# Supplementary material for: The Diagnostic and Prognostic Values of HOXA Gene Family in Kidney Clear Cell Renal Cell Carcinoma
Source: Hindawi journal article supplement (doi:10.1155/2022/1762637), 2022-03-16
Supplement: f1 [file 1762637.f1.zip]

### The Discovery set

| id                           | age | grade | stage | M | T | MIR324 | XIST        | MIR210      | MIR25       | GABPB1.AS1  | LINC00894   | SNHG7       | FGD5.AS1    | MIR22HG     |             |
|------------------------------|-----|-------|-------|---|---|--------|-------------|-------------|-------------|-------------|-------------|-------------|-------------|-------------|-------------|
| TCGA-3Z-A93Z-01A-11R-A37O-07 | 1   |       | 2     | 1 | 1 | 0      | 0.612994625 | 0.017067153 | 3.225795816 | 2.570791284 | 0.743989965 | 0.135492261 | 3.899170055 | 4.145603507 | 3.200293686 |
| TCGA-A3-3306-01A-01R-0864-07 | 1   |       | 3     | 1 | 1 | 0      | 0.88577595  | 0.005145434 | 0.281897603 | 2.60562447  | 0.977179296 | 0.391317923 | 1.441174126 | 4.360450706 | 2.776280333 |
| TCGA-A3-3307-01A-01R-0864-07 | 1   |       | 3     | 1 | 1 | 2      | 0.484714312 | 0.004847677 | 1.011797781 | 2.466104779 | 1.182134566 | 0.580251633 | 2.640142256 | 4.704912301 | 4.30062154  |
| TCGA-A3-3311-01A-02R-1325-07 | 0   |       | 2     | 1 | 1 | 0      | 0.181635462 | 0.003259461 | 0.348477879 | 1.281629773 | 0.506645685 | 0.337764557 | 2.349022868 | 4.28629044  | 2.498248126 |
| TCGA-A3-3316-01A-01R-0864-07 | 0   |       | 3     | 1 | 1 | 1      | 0.318189979 | 0.003995546 | 1.173933342 | 2.569322713 | 2.13836557  | 0.600056476 | 1.418402138 | 4.331072939 | 4.034135136 |
| TCGA-A3-3322-01A-02R-1325-07 | 0   |       | 2     | 1 | 1 | 0      | 1.436572454 | 0.016813401 | 2.882044796 | 3.506785875 | 2.038529096 | 0.642447871 | 4.203742106 | 4.108666845 | 2.77547061  |
| TCGA-A3-3324-01A-02R-1325-07 | 0   |       | 3     | 1 | 1 | 0      | 1.070503483 | 0.005563705 | 1.872002034 | 2.994166784 | 1.757966131 | 0.407530454 | 2.236170111 | 4.159969709 | 2.709265411 |
| TCGA-A3-3325-01A-01R-0864-07 | 0   |       | 2     | 1 | 1 | 0      | 1.564626783 | 0.003337968 | 2.986442091 | 3.427029174 | 2.192708363 | 0.780208414 | 2.899234695 | 4.544274306 | 3.884063664 |
| TCGA-A3-3326-01A-01R-0864-07 | 0   |       | 0     | 1 | 1 | 0      | 0.811778007 | 0.003058685 | 2.489194856 | 3.401639195 | 2.050318401 | 0.744755886 | 3.096730379 | 4.010027102 | 2.35283203  |
| TCGA-A3-3328-01A-01R-0864-07 | 1   |       | 2     | 1 | 1 | 0      | 0.162490348 | 0.001931713 | 1.556875941 | 1.888406987 | 1.081957349 | 1.142674252 | 2.90086614  | 6.051657241 | 5.001901716 |
| TCGA-A3-3329-01A-01R-0864-07 | 1   |       | 2     | 1 | 1 | 0      | 0.715568508 | 0           | 4.221315867 | 3.049190828 | 0.795570848 | 0.628501044 | 3.795103959 | 4.493731857 | 3.973617836 |
| TCGA-A3-3331-01A-02R-1325-07 | 1   |       | 2     | 1 | 1 | 0      | 0.839902193 | 4.276446755 | 1.524404398 | 2.173381601 | 1.431317191 | 0.651998986 | 2.413291504 | 4.423857058 | 3.901148586 |
| TCGA-A3-3335-01A-01R-0864-07 | 0   |       | 4     | 1 | 1 | 1      | 1.074695993 | 0.01005463  | 1.349812207 | 1.074695993 | 1.661221394 | 0.664864528 | 2.900347554 | 3.597536036 | 1.900514427 |
| TCGA-A3-3343-01A-01R-0864-07 | 1   |       | 3     | 1 | 1 | 1      | 0.372642314 | 0.002387353 | 2.498569602 | 2.514892678 | 1.300531513 | 0.54020439  | 3.63085585  | 4.336509501 | 2.818106371 |
| TCGA-A3-3346-01A-01R-1766-07 | 1   |       | 3     | 1 | 1 | 0      | 0.374345468 | 0.003598101 | 2.384858827 | 1.834918089 | 1.139656113 | 0.44858756  | 1.70672591  | 3.948594154 | 1.870165575 |
| TCGA-A3-3347-01A-02R-1325-07 | 1   |       | 2     | 1 | 1 | 0      | 1.147750238 | 4.422461737 | 2.289887409 | 3.222819834 | 1.44294522  | 0.592229977 | 1.512641097 | 4.88114337  | 3.498082763 |
| TCGA-A3-3349-01A-01R-1188-07 | 0   |       | 2     | 1 | 1 | 0      | 0.761124026 | 2.296947881 | 2.002391016 | 3.223071373 | 1.347489107 | 0.683590811 | 3.515640566 | 4.618519963 | 2.590553847 |
| TCGA-A3-3351-01A-02R-1325-07 | 0   |       | 2     | 1 | 1 | 1      | 0.632657476 | 0.022140609 | 3.56497564  | 3.219932327 | 2.162229568 | 1.356109531 | 3.033614183 | 4.461891409 | 2.748192051 |
| TCGA-A3-3352-01A-01R-0864-07 | 1   |       | 3     | 1 | 1 | 2      | 1.201110179 | 0.004852942 | 2.370684618 | 2.721679819 | 1.01271579  | 0.745199779 | 3.101184112 | 4.270679917 | 2.302202596 |
| TCGA-A3-3359-01A-01R-0864-07 | 1   |       | 2     | 1 | 1 | 0      | 1.111658238 | 3.904797427 | 2.868736082 | 2.034158266 | 1.008416597 | 0.846844204 | 2.585563961 | 4.410656634 | 3.691176217 |
| TCGA-A3-3362-01A-02R-1325-07 | 0   |       | 2     | 1 | 1 | 0      | 0.827033403 | 3.339759142 | 2.65986119  | 1.732095958 | 1.026468089 | 0.773591872 | 2.80026231  | 4.375406672 | 3.19277564  |
| TCGA-A3-3363-01A-01R-0864-07 | 0   |       | 2     | 1 | 1 | 1      | 0.484500009 | 0.10701751  | 0.858151766 | 3.01705373  | 0.862262497 | 0.889887091 | 2.354737178 | 5.431375747 | 2.647157491 |
| TCGA-A3-3365-01A-01R-0864-07 | 0   |       | 2     | 1 | 1 | 0      | 0.230286292 | 0.008393958 | 0.234151056 | 2.758926466 | 1.724728195 | 0.505873413 | 2.491012747 | 5.237677123 | 4.749241757 |
| TCGA-A3-3367-01A-02R-1420-07 | 1   |       | 3     | 1 | 1 | 0      | 0.548657118 | 0.002810756 | 0.436537679 | 2.531437994 | 0.878063741 | 0.594756831 | 3.816034373 | 4.201271172 | 1.949998431 |
| TCGA-A3-3370-01A-02R-1420-07 | 0   |       | 2     | 1 | 1 | 0      | 0.629053046 | 4.546922515 | 2.291428992 | 2.708930724 | 1.028402557 | 0.90254606  | 2.981932338 | 4.372988402 | 3.003469631 |
| TCGA-A3-3372-01A-02R-1325-07 | 0   |       | 2     | 1 | 1 | 2      | 0.884609178 | 0.018180215 | 1.782972359 | 2.511333662 | 2.348491201 | 0.775702778 | 2.57859596  | 4.62067451  | 2.735664437 |
| TCGA-A3-3373-01A-02R-1420-07 | 0   |       | 3     | 1 | 1 | 0      | 0.742059926 | 2.927208034 | 1.312498555 | 0.67611675  | 0.925156268 | 0.254105705 | 1.655224791 | 4.558682345 | 3.400664357 |
| TCGA-A3-3374-01A-02R-1325-07 | 0   |       | 2     | 1 | 1 | 0      | 0.508855161 | 0.126832068 | 0           | 1.617115936 | 0.305919126 | 0.402856725 | 2.687029058 | 5.361132257 | 3.76615494  |
| TCGA-A3-3378-01A-02R-1325-07 | 0   |       | 3     | 1 | 1 | 0      | 0.511484573 | 0.010312119 | 1.107916357 | 2.138857283 | 1.450944361 | 0.740549762 | 1.37725409  | 4.354650317 | 2.58262656  |
| TCGA-A3-3380-01A-01R-0864-07 | 0   |       | 2     | 1 | 1 | 0      | 1.061215601 | 0.010970501 | 2.796421778 | 2.910758375 | 1.711536749 | 0.866219181 | 4.074754043 | 4.476725339 | 2.876421668 |
| TCGA-A3-3382-01A-02R-1325-07 | 1   |       | 3     | 1 | 1 | 0      | 0.712210919 | 0.005165583 | 2.193630532 | 2.206988983 | 0.936181763 | 0.768781454 | 3.302832174 | 4.475608227 | 2.003859915 |
| TCGA-A3-3383-01A-02R-1325-07 | 0   |       | 2     | 1 | 1 | 0      | 1.149579478 | 0.001645461 | 1.961564829 | 3.007227286 | 0.626830268 | 0.388862309 | 4.127562061 | 3.180763726 | 2.228591483 |
| TCGA-A3-3385-01A-02R-1420-07 | 0   |       | 2     | 1 | 1 | 0      | 0.90433916  | 4.279462467 | 1.536979135 | 2.410592353 | 1.528644054 | 0.484645215 | 3.517049678 | 4.730541686 | 1.171061287 |
| TCGA-A3-3387-01A-01R-1541-07 | 0   |       | 2     | 1 | 1 | 0      | 0.615831135 | 0.002156652 | 2.088388553 | 2.850360742 | 2.169902981 | 0.629481015 | 3.102031087 | 4.644681465 | 2.953302186 |
| TCGA-A3-A6NI-01A-11R-A33J-07 | 0   |       | 3     | 1 | 1 | 0      | 1.210963064 | 0.004730081 | 4.105569525 | 2.774859591 | 1.349823322 | 0.42396146  | 3.815907235 | 3.950723858 | 2.844287077 |
| TCGA-A3-A6NJ-01A-12R-A33J-07 | 0   |       | 0     | 1 | 1 | 0      | 1.21795398  | 3.547577122 | 2.383944423 | 1.778756997 | 0.721113738 | 0.32483724  | 2.829070612 | 4.403901691 | 3.901135882 |
| TCGA-A3-A6NL-01A-11R-A33J-07 | 0   |       | 2     | 1 | 1 | 0      | 1.50357892  | 3.929955013 | 3.175675357 | 3.102076308 | 0.865595169 | 0.649801673 | 3.529893052 | 4.360605598 | 3.000273959 |
| TCGA-A3-A6NN-01A-12R-A33J-07 | 1   |       | 2     | 1 | 1 | 0      | 0.981925585 | 0           | 2.450942053 | 2.681948747 | 1.465168943 | 0.464652728 | 4.295234184 | 4.669329602 | 2.459078033 |
| TCGA-A3-A8CQ-01A-11R-A37O-07 | 0   |       | 2     | 1 | 1 | 0      | 0.95113009  | 3.876517783 | 4.526587607 | 2.164993148 | 0.794009572 | 0.548859763 | 3.047193208 |             |             |

|                              |   |   |   |   |   |             |             |             |             |             |             |             |             |             |
|------------------------------|---|---|---|---|---|-------------|-------------|-------------|-------------|-------------|-------------|-------------|-------------|-------------|
| TCGA-AK-3455-01A-01R-0864-07 | 1 | 3 | 1 | 1 | 2 | 0.239181111 | 1.028320044 | 1.303815105 | 1.423852472 | 1.126102092 | 0.955355464 | 3.162362947 | 4.149272586 | 2.597510204 |
| TCGA-AK-3456-01A-02R-1325-07 | 0 | 3 | 1 | 1 | 1 | 0           | 0.001524229 | 0           | 1.002351855 | 0.832869067 | 0.337119156 | 1.629813577 | 5.139685931 | 1.633486492 |
| TCGA-AK-3458-01A-01R-1503-07 | 0 | 3 | 1 | 1 | 0 | 0.26267265  | 0.055579584 | 2.742704936 | 1.872889883 | 1.330085026 | 0.864455168 | 4.449753522 | 4.290539994 | 1.868527923 |
| TCGA-AK-3465-01A-02R-1325-07 | 1 | 1 | 1 | 1 | 0 | 0.49516194  | 1.410903263 | 0.874874112 | 2.156339112 | 1.210052124 | 0.828701961 | 3.747043489 | 5.685847879 | 3.973491545 |
| TCGA-AS-3778-01A-01R-A32Z-07 | 0 | 0 | 1 | 1 | 0 | 1.676032457 | 0.003555393 | 3.691770793 | 2.404189837 | 1.482318566 | 0.646331805 | 4.087508707 | 4.201578997 | 3.125043269 |
| TCGA-B0-4691-01A-01R-1277-07 | 0 | 3 | 1 | 2 | 1 | 1.066457636 | 0.049823588 | 2.60724704  | 2.116019731 | 0.60289818  | 0.638374526 | 2.592864693 | 3.918399011 | 3.298125705 |
| TCGA-B0-4693-01A-01R-1277-07 | 1 | 4 | 1 | 1 | 2 | 1.622325633 | 4.049374919 | 1.958338539 | 1.592501564 | 1.235114774 | 0.750907614 | 2.268722514 | 4.148516032 | 4.025199305 |
| TCGA-B0-4697-01A-01R-1277-07 | 0 | 4 | 1 | 2 | 2 | 2.586790188 | 3.692786743 | 2.191896546 | 2.323682719 | 1.928915014 | 1.415523562 | 3.164178955 | 4.174945746 | 2.354286995 |
| TCGA-B0-4698-01A-01R-1503-07 | 1 | 4 | 1 | 1 | 3 | 1.006196411 | 0.012213433 | 1.107898882 | 1.422778864 | 0.952628053 | 0.969412088 | 3.84822797  | 5.374507206 | 2.541883068 |
| TCGA-B0-4699-01A-01R-1277-07 | 1 | 4 | 1 | 2 | 3 | 0.999814464 | 0.011741149 | 1.463740342 | 1.72353147  | 1.229260155 | 1.023990302 | 2.95931446  | 5.465216616 | 3.606612567 |
| TCGA-B0-4700-11A-01R-1541-07 | 0 | 4 | 1 | 2 | 3 | 1.173711779 | 0.002906147 | 0.242057741 | 1.419296926 | 0.949420613 | 0.670035038 | 1.169083084 | 5.040116929 | 3.575573458 |
| TCGA-B0-4700-01A-02R-1541-07 | 0 | 4 | 1 | 2 | 3 | 0.866784453 | 0.436786838 | 1.59099184  | 1.069100728 | 0.657875384 | 0.23988225  | 1.558085998 | 4.143126492 | 2.752678245 |
| TCGA-B0-4701-01A-01R-1277-07 | 1 | 3 | 1 | 2 | 2 | 1.964330139 | 4.229498098 | 2.991524391 | 1.899790611 | 1.150498432 | 0.908411313 | 3.615539194 | 4.157683445 | 3.291623428 |
| TCGA-B0-4706-01A-01R-1503-07 | 0 | 4 | 1 | 1 | 2 | 2.010914841 | 0.007002252 | 3.358456001 | 2.675214597 | 1.635704744 | 1.24336188  | 4.610597719 | 4.199402512 | 2.041823042 |
| TCGA-B0-4707-01A-01R-1277-07 | 0 | 4 | 1 | 1 | 2 | 0.774127771 | 0.401173266 | 2.54113108  | 2.806709948 | 1.102105564 | 0.765734008 | 3.553266347 | 3.852998454 | 1.841477441 |
| TCGA-B0-4710-01A-01R-1503-07 | 1 | 3 | 1 | 1 | 2 | 2.820169397 | 4.251437685 | 2.493009276 | 2.497709632 | 1.426374544 | 0.810960414 | 2.770824401 | 3.920260793 | 3.283561272 |
| TCGA-B0-4712-01A-01R-1503-07 | 1 | 3 | 1 | 2 | 2 | 0           | 0.001169909 | 1.304456842 | 1.548376689 | 0.361976545 | 0.224994942 | 2.247117269 | 4.672651177 | 2.620492079 |
| TCGA-B0-4712-11A-02R-1503-07 | 1 | 3 | 1 | 2 | 2 | 0           | 0           | 0.155386172 | 0.200276643 | 0.565462146 | 0.069645782 | 2.030783144 | 5.828314292 | 3.324135643 |
| TCGA-B0-4714-01A-01R-1277-07 | 1 | 3 | 1 | 2 | 2 | 1.605440365 | 0.040089504 | 3.277732686 | 4.272327069 | 1.541935909 | 1.486824642 | 3.135656557 | 4.156690426 | 2.395927886 |
| TCGA-B0-4718-01A-01R-1277-07 | 0 | 2 | 1 | 1 | 2 | 1.132686837 | 0.152188829 | 4.089959659 | 2.679594458 | 1.201694561 | 1.358009421 | 3.088728869 | 3.899446619 | 3.159627533 |
| TCGA-B0-4810-01A-01R-1503-07 | 0 | 3 | 1 | 1 | 2 | 1.160532164 | 0.007768842 | 3.071659823 | 1.973924375 | 1.426437214 | 0.753313251 | 3.087660596 | 4.338214081 | 2.802725819 |
| TCGA-B0-4811-01A-01R-1503-07 | 0 | 3 | 1 | 1 | 2 | 2.555608744 | 0.093468    | 3.714513598 | 3.95808118  | 1.66601883  | 0.986358532 | 3.925370587 | 3.764393403 | 2.998561301 |
| TCGA-B0-4813-01A-01R-1277-07 | 1 | 3 | 1 | 1 | 2 | 1.514656257 | 0.163530525 | 3.386174026 | 3.775219207 | 1.347031779 | 1.488163146 | 3.540314221 | 3.963474787 | 3.644244326 |
| TCGA-B0-4814-01A-01R-1277-07 | 0 | 3 | 1 | 2 | 3 | 2.079346457 | 0.024567721 | 2.099232808 | 2.406412322 | 1.305222341 | 1.081228361 | 3.189572486 | 3.994275818 | 1.535014538 |
| TCGA-B0-4815-01A-01R-1503-07 | 0 | 4 | 1 | 1 | 2 | 1.590689608 | 0.005813579 | 3.004227154 | 3.237404132 | 1.172236495 | 0.795485755 | 2.840031683 | 4.378521916 | 3.118788402 |
| TCGA-B0-4816-01A-01R-1503-07 | 0 | 3 | 1 | 1 | 1 | 0.673997429 | 0.02203803  | 2.095620425 | 3.081245031 | 1.451753548 | 0.430908223 | 2.816543832 | 4.496634122 | 3.377117995 |
| TCGA-B0-4818-01A-01R-1503-07 | 1 | 3 | 1 | 1 | 1 | 0.637534696 | 4.007703015 | 3.329460262 | 1.917753546 | 0.844135898 | 0.791451036 | 2.912239481 | 4.432852367 | 2.744235979 |
| TCGA-B0-4819-01A-01R-1277-07 | 0 | 4 | 1 | 2 | 2 | 1.667493521 | 2.703846543 | 1.016396636 | 2.813025752 | 1.565307337 | 1.025061946 | 2.210901026 | 4.509835894 | 3.705454856 |
| TCGA-B0-4823-01A-02R-1420-07 | 1 | 2 | 1 | 1 | 0 | 0           | 0.009382424 | 0.198839404 | 0.255215985 | 0.214015523 | 0.058154248 | 3.765151232 | 4.380066043 | 2.825007553 |
| TCGA-B0-4824-01A-01R-1277-07 | 0 | 3 | 1 | 1 | 0 | 0.866943928 | 3.775280105 | 2.906985806 | 1.795511935 | 1.647799395 | 1.061501465 | 2.833139472 | 4.223823421 | 2.707295408 |
| TCGA-B0-4827-01A-02R-1420-07 | 1 | 4 | 1 | 1 | 2 | 0           | 0.980520136 | 0.321651408 | 0           | 0.156198365 | 0.009372324 | 2.529545933 | 3.7993921   | 2.080482308 |
| TCGA-B0-4828-01A-01R-1277-07 | 1 | 3 | 1 | 2 | 1 | 1.429162885 | 0.120095612 | 2.980891194 | 3.107364601 | 1.063439052 | 1.051038566 | 3.306139144 | 3.924602526 | 3.489430937 |
| TCGA-B0-4833-01A-01R-1305-07 | 1 | 2 | 1 | 1 | 0 | 0.964749564 | 3.314317576 | 2.355685093 | 3.106649416 | 1.893215831 | 1.141005909 | 3.399903842 | 4.166896407 | 2.601474387 |
| TCGA-B0-4834-01A-01R-1305-07 | 0 | 3 | 1 | 1 | 0 | 0.204113129 | 0.00491998  | 0           | 1.009480808 | 0.35548443  | 0.779110675 | 3.143869334 | 5.22106084  | 4.276789894 |
| TCGA-B0-4837-01A-01R-1305-07 | 0 | 3 | 1 | 1 | 0 | 0.210872842 | 0.017753695 | 2.228278602 | 1.814842099 | 1.167160674 | 0.357913745 | 2.903620134 | 3.954306724 | 2.078351224 |
| TCGA-B0-4838-01A-01R-1305-07 | 1 | 3 | 1 | 1 | 0 | 1.925287422 | 4.150307033 | 1.003983148 | 2.025897369 | 2.105338733 | 0.732762823 | 1.870248475 | 4.409084208 | 3.478917962 |
| TCGA-B0-4841-01A-01R-1277-07 | 0 | 3 | 1 | 2 | 1 | 0           | 0.561436229 | 1.319916238 | 0.477101901 | 0.334159127 | 0.260462869 | 2.437644324 | 3.947744438 | 2.678679046 |
| TCGA-B0-4842-01A-02R-1420-07 | 1 | 4 | 1 | 1 | 2 | 0           | 0.190241779 | 0.694119889 | 0           | 0.343739691 | 0.035739346 | 2.56489162  | 3.491095607 | 1.728653156 |
| TCGA-B0-4843-01A-01R-1277-07 | 0 | 3 | 1 | 1 | 2 | 1.161884757 | 0.054149442 | 2.948596243 | 2.357547747 | 0.8779195   | 0.560647507 | 3.133009378 | 3.897895812 | 3.200457551 |
| TCGA-B0-4844-01A-01R-1277-07 | 0 | 3 | 1 | 2 | 2 | 0.474012747 | 0.045014427 | 1.915435541 | 2.211125136 | 0.91070181  | 0.753208614 | 2.064660713 | 3.790513124 | 2.471093783 |
| TCGA-B0-4845-01A-01R-1277-07 | 1 | 2 | 1 | 2 | 2 | 2.991031437 | 0.032853642 | 3.656862347 | 3.885772828 | 2.494066199 | 1.054122445 | 2.08516735  | 4.336954142 | 2.981578158 |
| TCGA-B0-4846-01A-01R-1277-07 | 0 | 2 | 1 | 2 | 2 | 1.015944124 | 3.722828599 | 1.130600896 | 1.897602728 | 1.047727287 | 0.621084223 | 2.088243891 | 4.525813924 | 4.114595975 |
| TCGA-B0-4847-01A-01R-1277-07 | 0 | 3 | 1 | 2 | 2 | 1.390787625 | 0.014719997 | 3.075995979 | 3.529123405 | 0.837220168 | 1.029719037 | 2.888110188 | 3.593357749 | 3.01725437  |
| TCGA-B0-4849-01A-01R-1277-07 | 0 | 3 | 1 | 1 | 2 | 1.082399564 | 0.10481931  | 2.882074943 | 2.859633476 | 2.2450794   | 1.095083694 | 3.39713198  | 4.387835844 | 4.33136322  |
| TCGA-B0-4852-01A-01R-1503-07 | 1 | 2 | 1 | 1 | 1 | 1.187315577 | 4.217898982 | 2.087895181 | 1.829675971 | 1.253102554 | 0.919957865 | 2.487846681 | 4.283844185 | 3.343007288 |
| TCGA-B0-4945-01A-01R-1420-07 | 1 | 2 | 1 | 1 | 0 | 0.452854969 | 3.435050932 | 2.460849543 | 1.568833002 | 1.824199822 | 1.261694175 | 1.918476338 | 4.470468546 | 4.482982985 |
| TCGA-B0-5075-01A-01R-1334-07 | 1 | 2 | 1 | 1 | 2 | 0.995866441 | 3.611439872 | 1.930585598 | 1.389734573 | 0.571600265 | 0.744262075 | 2.117810219 | 3.933866943 | 2.868418675 |
| TCGA-B0-5077-01A-01R-1334-07 | 1 | 3 | 1 | 1 | 0 | 1.049965504 | 0.002889921 | 2.742421877 | 0.964611614 | 1.12294792  | 0.891711585 | 3.4519181   | 4.067125841 | 3.00318358  |
| TCGA-B0-5083-01A-02R-1420-07 | 0 | 3 | 1 | 1 | 0 | 0           | 0.223745518 | 0           | 0.957646665 | 0.122580383 | 0.040066709 | 3.074975679 | 5.082187587 | 3.113185335 |
| TCGA-B0-5085-01A-01R-1334-07 | 1 | 3 | 1 | 1 | 2 | 2.22750294  | 2.473830991 | 4.34879937  | 2.835663702 | 0.980048281 | 1.06730275  | 3.408814092 | 3.348912989 | 3.901840044 |
| TCGA-B0-5094-01A-01R-1420-07 | 0 | 2 | 1 | 2 | 2 | 1.336093536 | 0.010077917 | 2.133244734 | 3.131251138 | 0.966622207 | 0.618447181 | 2.371015199 | 3.86935751  | 2.487027791 |
| TCGA-B0-5096-01A-01R-1420-07 | 1 | 1 | 1 | 1 | 2 | 0.232294218 | 1.723822514 | 1.37901155  | 1.517770928 | 0.502704704 | 0.164381832 | 1.707139869 | 4.06439021  | 2.156999135 |
| TCGA-B0-5097-01A-01R-1420-07 | 0 | 2 | 1 | 1 | 2 | 0.837234847 | 2.651902187 | 1.287864999 | 2.255738816 | 0.523004172 | 0.338837529 | 1.824842214 | 4.379294993 | 3.814015398 |
| TCGA-B0-5099-01A-01R-1420-07 | 1 | 3 | 1 | 1 | 2 | 1.980424072 | 4.053738549 | 2.961381596 | 1.516362556 | 0.811594351 | 0.825199673 | 3.203762044 | 4.050432156 | 4.896987289 |
| TCGA-B0-5100-01A-01R-1420-07 | 1 | 3 | 1 | 1 | 2 | 0.567206223 | 0.010375346 | 3.247991372 | 1.321045799 | 0.730692685 | 0.265332826 | 3.57097047  | 4.723462256 | 3.195315299 |
| TCGA-B0-5104-01A-01R-1420-07 | 1 | 2 | 1 | 1 | 0 | 1.392016492 | 2.172302712 | 1.718147766 | 1.736625307 | 0.760520889 | 0.679912748 | 2.326709321 | 4.197511262 | 3.916771212 |
| TCGA-B0-5107-01A-01R-1420-07 | 0 | 4 | 1 | 2 | 1 | 1.294209433 | 3.0736529   | 2.823677757 | 3.752759547 | 1.04597469  | 0.864259239 | 3.061860616 | 4.082354755 | 1.654829317 |
| TCGA-B0-5108-01A-01R-1420-07 | 0 | 2 | 1 | 1 | 2 | 1.183350637 | 0.001144476 | 3.223430427 | 1.862440685 | 0.658300825 | 0.403486662 | 2.104940811 | 4.316039647 | 2.681157727 |

|                              |   |   |   |   |   |             |             |             |             |             |             |             |             |             |
|------------------------------|---|---|---|---|---|-------------|-------------|-------------|-------------|-------------|-------------|-------------|-------------|-------------|
| TCGA-B0-5109-01A-02R-1420-07 | 1 | 4 | 1 | 1 | 2 | 1.126253749 | 0.010918508 | 0.229046276 | 1.598293051 | 0.567014969 | 0.357686519 | 4.12751317  | 4.167942179 | 2.256319646 |
| TCGA-B0-5110-01A-01R-1420-07 | 1 | 2 | 1 | 1 | 0 | 1.087699369 | 4.897164907 | 2.348282304 | 2.215363423 | 0.831713403 | 0.825140986 | 2.655385034 | 4.556577166 | 4.289414322 |
| TCGA-B0-5113-01A-01R-1420-07 | 1 | 2 | 1 | 1 | 2 | 0.184049813 | 4.732747994 | 2.245083814 | 1.293604278 | 0.698442138 | 0.880613822 | 2.283526751 | 4.719077674 | 2.635983988 |
| TCGA-B0-5115-01A-01R-1420-07 | 0 | 3 | 1 | 2 | 1 | 1.285593068 | 0.016227514 | 2.391079643 | 2.435447844 | 2.073382767 | 0.982171273 | 3.402848146 | 4.349762606 | 2.143780698 |
| TCGA-B0-5116-01A-02R-1420-07 | 0 | 3 | 1 | 1 | 2 | 0           | 0.00116876  | 1.386981768 | 1.547443745 | 0.212765518 | 0.061332671 | 3.048180659 | 4.277815102 | 2.190593753 |
| TCGA-B0-5117-01A-01R-1420-07 | 0 | 2 | 1 | 1 | 0 | 0           | 0           | 0.22969739  | 2.341464509 | 0.379167938 | 0.92656804  | 3.5311565   | 4.831691087 | 3.997557181 |
| TCGA-B0-5399-01A-01R-1503-07 | 0 | 2 | 1 | 1 | 0 | 0.366771262 | 0.002344794 | 2.587450225 | 2.33699544  | 0.954517024 | 0.74791824  | 3.800965328 | 4.297998901 | 2.72772217  |
| TCGA-B0-5400-01A-01R-1503-07 | 0 | 4 | 1 | 1 | 2 | 0.375835156 | 1.29220883  | 0.540525126 | 1.131169307 | 0.33562342  | 0.34050336  | 1.852776848 | 3.635310465 | 2.802673689 |
| TCGA-B0-5402-11A-01R-1503-07 | 0 | 4 | 1 | 1 | 3 | 0.310316062 | 0.005824807 | 0.315383732 | 0.400507797 | 0.268983079 | 0.097796685 | 2.015589261 | 4.994093785 | 3.830134868 |
| TCGA-B0-5402-01A-01R-1503-07 | 0 | 4 | 1 | 1 | 3 | 0.291462585 | 0.002719953 | 1.662448926 | 0.922594905 | 0.297670903 | 0.204987435 | 2.715658042 | 4.176100796 | 2.688338633 |
| TCGA-B0-5690-11A-01R-1541-07 | 0 | 0 | 1 | 1 | 0 | 0           | 1.766623315 | 0           | 0.608736138 | 0.394897945 | 0.049446138 | 2.639152484 | 5.536044469 | 3.131323955 |
| TCGA-B0-5690-01A-11R-1541-07 | 0 | 0 | 1 | 1 | 0 | 0.712200913 | 3.696337271 | 1.781213364 | 1.543448668 | 0.66798021  | 0.290777709 | 3.374368804 | 4.521160859 | 2.779407797 |
| TCGA-B0-5691-11A-01R-1541-07 | 1 | 3 | 1 | 1 | 0 | 0.149044085 | 2.866792363 | 0           | 1.011344571 | 0.568030406 | 0.17278789  | 2.175675564 | 5.371073438 | 3.730660959 |
| TCGA-B0-5692-01A-11R-1541-07 | 1 | 3 | 1 | 1 | 2 | 0.411826669 | 0.566402454 | 1.81673048  | 1.345806763 | 0.25301446  | 0.272311401 | 2.746285803 | 3.919397973 | 1.895286556 |
| TCGA-B0-5694-11A-01R-1541-07 | 1 | 3 | 1 | 1 | 2 | 0           | 0.02463905  | 0           | 0.980474355 | 0.402346877 | 0.17539887  | 2.259693193 | 5.236556414 | 3.885627707 |
| TCGA-B0-5694-01A-11R-1541-07 | 1 | 3 | 1 | 1 | 2 | 0.510255188 | 0.015396843 | 0.518048308 | 1.936847355 | 0.372515629 | 0.154110901 | 2.671323161 | 4.024779873 | 2.128938335 |
| TCGA-B0-5695-01A-11R-1541-07 | 0 | 2 | 1 | 1 | 0 | 0.168086925 | 2.727947656 | 1.253358274 | 0.866934864 | 0.312296837 | 0.169616801 | 3.360650089 | 4.358387827 | 2.912738122 |
| TCGA-B0-5696-01A-11R-1541-07 | 1 | 4 | 1 | 1 | 2 | 0.344576318 | 0.402882872 | 0.867144681 | 0.622514396 | 0.207615599 | 0.037427692 | 2.546823468 | 3.860024528 | 2.505892785 |
| TCGA-B0-5696-11A-01R-1541-07 | 1 | 4 | 1 | 1 | 2 | 0           | 0.002470746 | 0.208249861 | 0.68710689  | 0.32258459  | 0.094285996 | 2.510427372 | 5.302345123 | 3.315073257 |
| TCGA-B0-5697-01A-11R-1541-07 | 0 | 2 | 1 | 1 | 0 | 0.16843633  | 1.900800995 | 1.400094079 | 0.993288847 | 0.381581341 | 0.195066281 | 1.413122487 | 5.003658098 | 2.694176432 |
| TCGA-B0-5698-01A-11R-1672-07 | 1 | 3 | 1 | 1 | 0 | 0.733887441 | 0.002148763 | 0.744308426 | 1.043332673 | 0.497302479 | 0.126467285 | 2.955150818 | 4.221794151 | 4.013217205 |
| TCGA-B0-5699-11A-01R-1541-07 | 0 | 2 | 1 | 1 | 0 | 0           | 0.00140504  | 0.436263407 | 0.944688526 | 0.36036027  | 0.102608085 | 2.433631652 | 5.248253766 | 3.636174136 |
| TCGA-B0-5701-01A-11R-1541-07 | 0 | 4 | 1 | 1 | 2 | 0.540155248 | 0.126800242 | 2.001985298 | 1.493911641 | 0.390532382 | 0.095417197 | 2.019793911 | 3.573380837 | 1.829868176 |
| TCGA-B0-5702-01A-11R-1541-07 | 1 | 2 | 1 | 1 | 0 | 0           | 0.033291259 | 0           | 0           | 0.233941786 | 0.021077074 | 3.418311197 | 1.586879907 | 1.456886466 |
| TCGA-B0-5703-01A-11R-1541-07 | 1 | 3 | 1 | 1 | 0 | 0.244938877 | 0           | 0.810342652 | 0.57864588  | 0.422453858 | 0.143897186 | 3.370726727 | 4.126936939 | 2.261991988 |
| TCGA-B0-5703-11A-01R-1541-07 | 1 | 3 | 1 | 1 | 0 | 0           | 0.002900631 | 0.241634289 | 0.967219125 | 0.560882627 | 0.184464637 | 3.143709452 | 5.707230767 | 3.854047135 |
| TCGA-B0-5705-11A-01R-1541-07 | 0 | 2 | 1 | 1 | 0 | 0           | 2.321333063 | 0           | 0.752040441 | 0.560760044 | 0.161124879 | 2.146998463 | 5.534367844 | 3.35524009  |
| TCGA-B0-5706-11A-01R-1541-07 | 0 | 2 | 1 | 1 | 1 | 0.227997089 | 0.002773317 | 0.231826438 | 0.752604119 | 0.836576903 | 0.382127483 | 2.350453694 | 5.703982168 | 3.716275951 |
| TCGA-B0-5709-11A-01R-1541-07 | 0 | 3 | 1 | 1 | 2 | 0.46182652  | 3.439061579 | 0.328946837 | 0.740476758 | 0.497327571 | 0.282237918 | 1.997151491 | 5.321041271 | 4.004283415 |
| TCGA-B0-5709-01A-11R-1541-07 | 0 | 3 | 1 | 1 | 2 | 0           | 1.707775932 | 1.680090184 | 0.886795438 | 0.304492449 | 0.103592812 | 1.812059787 | 4.68839724  | 2.631671003 |
| TCGA-B0-5710-01A-11R-1672-07 | 0 | 2 | 1 | 1 | 0 | 0           | 0.002502948 | 0.39464905  | 1.021490764 | 0.964127398 | 0.397758239 | 2.580674556 | 4.538427534 | 2.117028525 |
| TCGA-B0-5711-01A-11R-1672-07 | 0 | 3 | 1 | 1 | 2 | 0.194733741 | 0.00234125  | 0.527492034 | 0.470269017 | 0.641218423 | 0.157289267 | 2.904070502 | 4.223472927 | 2.258057565 |
| TCGA-B0-5712-11A-01R-1672-07 | 1 | 3 | 1 | 2 | 1 | 0           | 1.950557121 | 0           | 0.449646034 | 0.319229042 | 0.146503124 | 2.357652207 | 5.389088031 | 3.839707375 |
| TCGA-B0-5713-01A-11R-1672-07 | 1 | 3 | 1 | 1 | 2 | 0.765427095 | 3.251340887 | 0.776186647 | 1.317919183 | 0.776291473 | 0.209392635 | 2.40916542  | 4.366729353 | 3.343569063 |
| TCGA-B2-3923-01A-02R-A277-07 | 0 | 2 | 1 | 1 | 1 | 0           | 0.03450683  | 0           | 1.103478011 | 1.548529776 | 1.663116888 | 3.791518849 | 5.686715353 | 3.785409852 |
| TCGA-B2-3924-01A-02R-A277-07 | 1 | 2 | 1 | 1 | 0 | 0.520124397 | 0.014008189 | 2.315491213 | 2.161123794 | 1.616315969 | 0.835331144 | 3.78897386  | 4.572716092 | 2.903052538 |
| TCGA-B2-3924-01A-02R-1325-07 | 1 | 2 | 1 | 1 | 0 | 0.212423538 | 0.001285474 | 2.285819798 | 1.537840141 | 1.003791424 | 0.189658993 | 3.595680318 | 4.360834076 | 2.765812727 |
| TCGA-B2-4098-01A-02R-1325-07 | 1 | 2 | 1 | 1 | 0 | 1.340409408 | 1.072679309 | 1.356194777 | 2.346517606 | 1.433532307 | 1.686062956 | 2.257109506 | 4.759818072 | 2.844444536 |
| TCGA-B2-4101-01A-02R-1277-07 | 0 | 3 | 1 | 1 | 1 | 1.228412531 | 0.022954511 | 2.251159394 | 3.029125624 | 2.004393476 | 1.06650539  | 3.317117596 | 4.362411902 | 3.013995774 |
| TCGA-B2-4102-01A-02R-1325-07 | 0 | 2 | 1 | 1 | 0 | 1.338998047 | 0.059523927 | 2.914907262 | 3.458697447 | 0.927965131 | 1.072337008 | 1.919877337 | 4.541779693 | 3.026690157 |
| TCGA-B2-5633-01A-01R-1541-07 | 0 | 2 | 1 | 1 | 0 | 0.988024857 | 0.149811368 | 1.849401667 | 1.2086984   | 1.257832174 | 0.179376089 | 2.772020539 | 4.309064862 | 2.280514851 |
| TCGA-B2-5633-01A-01R-A277-07 | 0 | 2 | 1 | 1 | 0 | 0           | 0.01353137  | 0.250614823 | 1.453673058 | 1.460322682 | 0.467643077 | 3.258994089 | 4.962467879 | 2.325262163 |
| TCGA-B2-5635-01A-01R-1541-07 | 1 | 2 | 1 | 1 | 0 | 0.207629894 | 0.147772895 | 3.071656472 | 2.172667352 | 1.003693677 | 0.442732564 | 2.266163544 | 4.438385844 | 2.450152531 |
| TCGA-B2-5635-01B-04R-A277-07 | 1 | 2 | 1 | 1 | 0 | 1.264865578 | 0.042036337 | 2.301158848 | 3.002745887 | 3.063724921 | 3.022618298 | 1.977642566 | 4.990697313 | 2.720610799 |
| TCGA-B2-5636-01A-02R-1541-07 | 1 | 2 | 1 | 1 | 0 | 0.85384624  | 0.006530134 | 3.152364497 | 2.152032394 | 0.780663287 | 0.103477648 | 3.210602417 | 5.003052415 | 2.627151382 |
| TCGA-B2-5636-11A-01R-1541-07 | 1 | 2 | 1 | 1 | 0 | 0           | 0.002257374 | 0.511564001 | 1.201902691 | 0.83138616  | 0.220770476 | 2.287599476 | 5.082231838 | 3.663926819 |
| TCGA-B2-5639-01A-01R-1541-07 | 0 | 3 | 1 | 2 | 2 | 0           | 0           | 1.253794074 | 0.44641885  | 0.168806931 | 0.041112243 | 2.263026976 | 3.991131381 | 1.777390019 |
| TCGA-B2-5641-11A-01R-1541-07 | 1 | 3 | 1 | 1 | 0 | 0           | 0.001435104 | 0.783505951 | 1.273131878 | 1.321876167 | 0.158431832 | 2.033946793 | 5.793452778 | 3.443359759 |
| TCGA-B4-5377-01A-01R-1503-07 | 1 | 3 | 1 | 2 | 2 | 0.287122498 | 3.71530934  | 3.411553207 | 0.666493898 | 0.450808523 | 0.314732763 | 2.376244498 | 4.370721579 | 3.471054322 |
| TCGA-B4-5378-01A-01R-1503-07 | 0 | 2 | 1 | 1 | 0 | 0.590822868 | 0.074950717 | 3.267745505 | 1.426006232 | 0.63629536  | 0.297015217 | 4.105667828 | 5.021696197 | 2.703680617 |
| TCGA-B4-5832-01A-11R-1672-07 | 0 | 2 | 1 | 1 | 2 | 0           | 0           | 0           | 0           | 0.357274976 | 0.034914484 | 0.672766198 | 5.033712897 | 2.70964867  |
| TCGA-B4-5834-01A-11R-1672-07 | 0 | 0 | 1 | 1 | 0 | 0           | 0           | 1.664450066 | 0.222991612 | 0.497666937 | 0.080978242 | 3.95656133  | 4.477941897 | 1.762735663 |
| TCGA-B4-5835-01A-11R-1672-07 | 0 | 2 | 1 | 1 | 0 | 0           | 2.061574025 | 0.15549787  | 0.674574783 | 0.273114125 | 0.24623391  | 1.758184395 | 4.531025405 | 1.169507961 |
| TCGA-B4-5843-01A-11R-1672-07 | 0 | 2 | 1 | 1 | 0 | 0.436155529 | 0.001430163 | 0.238427459 | 1.122107417 | 0.481130129 | 0.209535194 | 2.774330579 | 4.351432561 | 1.772452665 |
| TCGA-B8-4146-01B-11R-1672-07 | 0 | 2 | 1 | 1 | 0 | 0           | 3.421056033 | 0.229619793 | 0.293872811 | 1.0468732   | 0.246209558 | 1.935810705 | 4.32032937  | 2.357493003 |
| TCGA-B8-4148-01A-02R-1325-07 | 0 | 3 | 1 | 1 | 0 | 1.78011977  | 4.880701907 | 4.144916221 | 2.579492942 | 1.354191405 | 0.861137283 | 2.51896454  | 4.670320464 | 4.114973396 |
| TCGA-B8-4151-01A-01R-1188-07 | 0 | 2 | 1 | 1 | 2 | 0.941433002 | 1.819359429 | 2.408978644 | 0.986809298 | 0.657440913 | 0.249898756 | 3.597374454 | 4.280944297 | 2.702664711 |
| TCGA-B8-4153-01B-11R-1672-07 | 1 | 3 | 1 | 1 | 2 | 0.639155971 | 0.003009539 | 1.790519613 | 1.576246278 | 0.994303524 | 0.337192785 | 3.301664617 | 3.996185927 | 3.097891567 |

|                              |   |   |   |   |   |             |             |             |             |             |             |             |             |             |
|------------------------------|---|---|---|---|---|-------------|-------------|-------------|-------------|-------------|-------------|-------------|-------------|-------------|
| TCGA-B8-4154-01A-01R-1188-07 | 1 | 2 | 1 | 1 | 0 | 1.558557481 | 1.965057271 | 1.767849206 | 1.415569424 | 0.618675872 | 0.151563059 | 3.680472539 | 4.606307067 | 2.880596962 |
| TCGA-B8-4619-11A-01R-1758-07 | 0 | 2 | 1 | 1 | 0 | 0           | 0.001855183 | 0.552172271 | 1.15136562  | 0.52497076  | 0.165660927 | 1.808438432 | 5.199575224 | 3.93386676  |
| TCGA-B8-4619-01A-02R-1325-07 | 0 | 2 | 1 | 1 | 0 | 0.398207704 | 0.003860314 | 0.404520735 | 1.908763147 | 0.769440809 | 0.922383031 | 2.298852087 | 5.567695118 | 4.413892374 |
| TCGA-B8-4620-01A-02R-1325-07 | 1 | 2 | 1 | 1 | 2 | 0.923083911 | 3.287119889 | 2.761051476 | 2.67287455  | 0.786165618 | 0.921609401 | 2.667108147 | 4.251628537 | 3.57652723  |
| TCGA-B8-4620-11A-01R-1758-07 | 1 | 2 | 1 | 1 | 2 | 0.308114949 | 1.478947416 | 0.78847981  | 0.965215947 | 0.534657147 | 0.26595314  | 2.161446781 | 5.45072223  | 4.126603345 |
| TCGA-B8-4622-01A-02R-1277-07 | 0 | 3 | 1 | 2 | 2 | 1.135221551 | 0.02200343  | 1.852236783 | 2.588325057 | 0.615012506 | 0.450333318 | 2.338563866 | 4.337372704 | 2.098495071 |
| TCGA-B8-4622-11A-01R-1758-07 | 0 | 3 | 1 | 2 | 2 | 0           | 0.001506862 | 0           | 0           | 0.191378663 | 0.074101159 | 2.375633603 | 5.300164621 | 3.323677014 |
| TCGA-B8-5158-01A-01R-1420-07 | 0 | 4 | 1 | 1 | 2 | 0.443933337 | 0           | 0.688343085 | 0.400837119 | 0.501600723 | 0.15413179  | 1.505351866 | 4.043616928 | 1.842289812 |
| TCGA-B8-5162-01A-01R-1420-07 | 0 | 2 | 1 | 1 | 1 | 0           | 0.002406927 | 0.931780408 | 0.481492327 | 0.432607232 | 0.08478233  | 2.17859168  | 4.672659975 | 2.436566821 |
| TCGA-B8-5163-01A-01R-1420-07 | 0 | 3 | 1 | 1 | 2 | 0           | 2.252780903 | 0.865428188 | 0           | 0.226974385 | 0.113985847 | 1.540548645 | 4.615247061 | 2.621675145 |
| TCGA-B8-5164-01A-01R-1420-07 | 0 | 3 | 1 | 1 | 2 | 0.162276034 | 0           | 2.174808097 | 0.84291819  | 0.437981139 | 0.206568194 | 1.447689287 | 4.77855451  | 2.902906953 |
| TCGA-B8-5165-01A-01R-1420-07 | 0 | 2 | 1 | 1 | 0 | 0           | 0.003964336 | 1.319456365 | 1.205259703 | 0.673188838 | 0.117119797 | 3.436470444 | 4.658652719 | 2.707741291 |
| TCGA-B8-5546-01A-01R-1541-07 | 0 | 2 | 1 | 1 | 0 | 0.261020451 | 1.35188694  | 0           | 0.338492507 | 0.466168862 | 0.135355163 | 3.204032203 | 4.969850287 | 1.744457313 |
| TCGA-B8-5549-11A-01R-1541-07 | 0 | 3 | 1 | 1 | 0 | 0           | 0           | 0.50937489  | 0.63644689  | 0.635158203 | 0.17650086  | 2.266842394 | 6.049265957 | 3.085317077 |
| TCGA-B8-5551-01A-01R-1541-07 | 0 | 3 | 1 | 1 | 0 | 0.229459304 | 3.017062323 | 0.908927925 | 1.103868992 | 0.56113525  | 0.177990977 | 2.106410014 | 4.596220443 | 2.641009927 |
| TCGA-B8-5552-11A-01R-1672-07 | 0 | 2 | 1 | 1 | 0 | 0           | 2.282286599 | 0           | 1.30539839  | 0.510477199 | 0.108618891 | 1.326397746 | 5.649833218 | 3.727134916 |
| TCGA-B8-5552-01B-11R-1672-07 | 0 | 2 | 1 | 1 | 0 | 0.48214988  | 2.806114934 | 1.230692058 | 0.612681047 | 0.767939542 | 0.147668415 | 2.558950434 | 4.826964179 | 3.13005326  |
| TCGA-B8-A54D-01A-21R-A266-07 | 1 | 2 | 1 | 1 | 2 | 1.663081866 | 0.005843942 | 3.29649956  | 2.127887254 | 1.372583118 | 1.701238416 | 2.910072974 | 4.988093946 | 2.859649099 |
| TCGA-B8-A54E-01A-11R-A266-07 | 0 | 3 | 1 | 1 | 0 | 0.475248531 | 0.734925416 | 0           | 0.832132819 | 0.550131624 | 0.177990762 | 3.076755867 | 4.334473869 | 3.164836271 |
| TCGA-B8-A54F-01A-11R-A266-07 | 0 | 2 | 1 | 1 | 0 | 1.474649154 | 4.635912694 | 3.04370067  | 2.933987862 | 1.664067052 | 0.878360318 | 3.69196466  | 4.267576701 | 2.353543021 |
| TCGA-B8-A54G-01A-11R-A266-07 | 0 | 3 | 1 | 1 | 0 | 1.006566239 | 0.024336654 | 2.568484961 | 3.047135101 | 1.468394594 | 1.363437454 | 3.007918518 | 4.488369283 | 2.515051906 |
| TCGA-B8-A54H-01A-11R-A33J-07 | 1 | 3 | 1 | 1 | 1 | 1.505125611 | 3.962906614 | 3.26466202  | 2.392032577 | 1.311675239 | 0.761055018 | 3.109336356 | 4.304693752 | 2.089111876 |
| TCGA-B8-A54I-01A-21R-A33J-07 | 0 | 3 | 1 | 1 | 0 | 1.502987633 | 0.001651356 | 4.313530881 | 2.264372595 | 0.829706034 | 0.63780215  | 1.673888923 | 3.530691496 | 2.703044131 |
| TCGA-B8-A54K-01A-11R-A33J-07 | 0 | 0 | 1 | 1 | 0 | 1.04354973  | 0.002865143 | 4.059056434 | 3.055044805 | 1.328746838 | 0.89897835  | 4.641013371 | 4.969033338 | 1.918341227 |
| TCGA-B8-A7U6-01A-12R-A37O-07 | 0 | 3 | 1 | 1 | 0 | 1.693930437 | 2.17582785  | 2.586699285 | 2.097119176 | 0.690240277 | 0.583905442 | 3.284928989 | 4.183918697 | 4.804230177 |
| TCGA-BP-4159-01A-02R-1289-07 | 1 | 2 | 1 | 1 | 0 | 0.456625155 | 0.089245589 | 1.095784199 | 1.578092594 | 0.539956105 | 0.157579245 | 3.760072353 | 4.454941147 | 2.469562625 |
| TCGA-BP-4162-01A-02R-1325-07 | 0 | 2 | 1 | 1 | 0 | 1.594995891 | 4.252383842 | 2.505013725 | 0.575238757 | 0.528055115 | 0.700281365 | 1.803640963 | 4.279119216 | 3.945727451 |
| TCGA-BP-4165-01A-02R-1289-07 | 0 | 0 | 1 | 1 | 0 | 0.632064944 | 3.776825033 | 3.586039376 | 2.365666116 | 1.394233976 | 0.763763875 | 3.779344647 | 4.470746255 | 2.513125903 |
| TCGA-BP-4166-01A-02R-1289-07 | 1 | 3 | 1 | 1 | 2 | 0           | 0.032274348 | 1.134591836 | 0.53338394  | 0.299544265 | 0.218372903 | 3.321651252 | 4.381419614 | 2.007225704 |
| TCGA-BP-4167-01A-02R-1325-07 | 0 | 2 | 1 | 1 | 2 | 1.063023392 | 0.017554892 | 0.944303092 | 1.668396381 | 0.519251182 | 0.153875482 | 2.486692847 | 4.722806331 | 2.805811924 |
| TCGA-BP-4169-01A-02R-1289-07 | 1 | 2 | 1 | 1 | 1 | 0.529696368 | 3.907922685 | 2.937804994 | 2.276423089 | 1.581129555 | 0.874164587 | 2.21033401  | 4.504204716 | 3.953170954 |
| TCGA-BP-4170-01A-02R-1289-07 | 1 | 2 | 1 | 1 | 0 | 0.169239733 | 2.461468332 | 2.059431211 | 1.318223775 | 0.349677029 | 0.201530932 | 2.590009385 | 4.372876097 | 2.754231943 |
| TCGA-BP-4173-01A-02R-1289-07 | 0 | 3 | 1 | 1 | 1 | 1.494378997 | 0.034713924 | 2.473789406 | 1.694583858 | 1.068594475 | 0.736503773 | 2.586276067 | 4.589543341 | 3.235148496 |
| TCGA-BP-4174-01A-02R-1289-07 | 0 | 3 | 1 | 1 | 1 | 0           | 0.034725502 | 1.484581306 | 0.892477805 | 0.467949235 | 0.251638407 | 2.787034497 | 4.255709275 | 1.919324219 |
| TCGA-BP-4177-01A-02R-1420-07 | 0 | 2 | 1 | 1 | 0 | 0.339422208 | 0.014974786 | 1.389806285 | 0.436872193 | 0.42574916  | 0.069472835 | 4.329119048 | 4.989349327 | 2.728183641 |
| TCGA-BP-4325-01A-02R-1289-07 | 0 | 2 | 1 | 1 | 0 | 1.154921892 | 4.361654844 | 2.198793296 | 3.027840952 | 1.328589638 | 0.714582014 | 2.969762653 | 4.337893754 | 2.463351443 |
| TCGA-BP-4327-01A-01R-1289-07 | 1 | 2 | 1 | 1 | 1 | 1.191885828 | 3.979374518 | 4.421924331 | 2.51345947  | 2.036958381 | 1.637059652 | 3.610234401 | 3.883265643 | 2.241206567 |
| TCGA-BP-4331-01A-01R-1289-07 | 0 | 2 | 1 | 1 | 0 | 2.108353649 | 0.006697058 | 3.725114215 | 3.242445965 | 1.343969125 | 0.874632461 | 3.056084221 | 4.295717061 | 4.107915795 |
| TCGA-BP-4332-01A-01R-1289-07 | 0 | 2 | 1 | 1 | 2 | 0.812244636 | 0.069394143 | 3.145806924 | 3.595400945 | 1.075813364 | 0.580562967 | 3.936431448 | 4.517472001 | 3.24370162  |
| TCGA-BP-4337-01A-01R-1289-07 | 1 | 4 | 1 | 1 | 2 | 0.967685578 | 2.747783947 | 3.379400755 | 3.310321645 | 2.737687803 | 1.017330557 | 2.764112224 | 4.066701403 | 2.557559724 |
| TCGA-BP-4338-01A-01R-1289-07 | 0 | 3 | 1 | 1 | 0 | 0           | 0.01046168  | 1.143255359 | 0.6559138   | 0.286333141 | 0.069984014 | 1.563529894 | 3.515267977 | 2.187231902 |
| TCGA-BP-4341-01A-01R-1289-07 | 1 | 2 | 1 | 1 | 2 | 2.368558732 | 0.087328969 | 3.63964943  | 2.518475965 | 1.704613506 | 1.215522566 | 4.157733879 | 3.999222785 | 3.102638369 |
| TCGA-BP-4342-01A-01R-1289-07 | 1 | 3 | 1 | 1 | 1 | 1.414946384 | 0.024729128 | 3.184664692 | 2.489265017 | 1.960411653 | 0.648622402 | 3.114842258 | 4.13809932  | 2.657260621 |
| TCGA-BP-4343-01A-02R-1289-07 | 0 | 3 | 1 | 1 | 2 | 0           | 0.198708836 | 0.228377484 | 0           | 0.262891895 | 0.177967597 | 1.965295919 | 5.090792021 | 2.231519013 |
| TCGA-BP-4345-01A-01R-1289-07 | 0 | 3 | 1 | 1 | 2 | 0.773530637 | 0.03858973  | 1.727489633 | 1.329691558 | 0.682564724 | 0.421475275 | 1.983758991 | 4.744802087 | 3.23890445  |
| TCGA-BP-4346-01A-01R-1289-07 | 0 | 3 | 1 | 1 | 2 | 1.296871983 | 0.024722623 | 3.208106259 | 3.585937374 | 1.976018603 | 1.188332063 | 2.273469233 | 4.394763031 | 2.363782088 |
| TCGA-BP-4347-01A-01R-1289-07 | 1 | 2 | 1 | 1 | 2 | 1.117860659 | 0.021402462 | 3.11948254  | 2.432237808 | 1.414309261 | 0.737331077 | 2.706743381 | 4.446259039 | 3.981151693 |
| TCGA-BP-4349-01A-01R-1289-07 | 1 | 2 | 1 | 1 | 0 | 1.639258486 | 4.13449907  | 4.09419885  | 3.183362207 | 2.369105405 | 1.088429769 | 2.717102191 | 4.112209129 | 3.338087969 |
| TCGA-BP-4351-01A-01R-1289-07 | 0 | 2 | 1 | 1 | 2 | 2.463891578 | 5.165860246 | 3.531197639 | 2.119670729 | 1.639179611 | 1.541695824 | 3.239344058 | 4.013574226 | 2.469068748 |
| TCGA-BP-4352-01A-01R-1289-07 | 1 | 4 | 1 | 2 | 2 | 2.553850548 | 1.950380238 | 3.212199911 | 3.825015118 | 2.934298209 | 1.774478496 | 4.157788609 | 4.299851788 | 1.438641406 |
| TCGA-BP-4353-01A-02R-1289-07 | 0 | 2 | 1 | 1 | 0 | 0.386819642 | 0.104562441 | 0.701502807 | 0.691548245 | 1.217969873 | 0.264879975 | 2.60898385  | 4.875096962 | 2.42375684  |
| TCGA-BP-4354-01A-02R-1289-07 | 0 | 4 | 1 | 2 | 3 | 1.168262508 | 0.013421137 | 2.653527133 | 2.647737408 | 0.631290451 | 0.585761605 | 2.628114937 | 4.791925914 | 4.117719843 |
| TCGA-BP-4355-01A-01R-1289-07 | 0 | 4 | 1 | 1 | 2 | 1.60534841  | 4.087421347 | 3.530963098 | 2.64100778  | 1.359714697 | 1.415312607 | 3.547049652 | 4.376645068 | 3.783011064 |
| TCGA-BP-4761-01A-01R-1289-07 | 0 | 4 | 1 | 1 | 2 | 0.689924426 | 0.101950285 | 2.506553866 | 1.787765117 | 0.381652961 | 0.244458759 | 3.806608924 | 3.16576675  | 2.148206704 |
| TCGA-BP-4762-01A-02R-1289-07 | 0 | 3 | 1 | 1 | 0 | 0           | 0.012933018 | 1.312235007 | 0.979060833 | 0.270345938 | 0.033121414 | 3.748929079 | 5.29592489  | 2.445671469 |
| TCGA-BP-4763-01A-01R-1289-07 | 1 | 2 | 1 | 1 | 0 | 0.704087991 | 2.353242488 | 0.214296715 | 0.505291026 | 0.55242947  | 0.108363899 | 1.406009733 | 4.646473213 | 2.871471675 |
| TCGA-BP-4766-01A-01R-1289-07 | 0 | 3 | 1 | 1 | 0 | 1.684957542 | 3.711660132 | 3.269993547 | 2.351182986 | 2.082433666 | 0.369740225 | 2.383859954 | 4.333211613 | 2.960008105 |
| TCGA-BP-4768-01A-01R-1289-07 | 1 | 2 | 1 | 1 | 0 | 0.596292672 | 0.009306092 | 3.950601644 | 2.936165971 | 2.094008417 | 0.831617487 | 3.294220552 | 3.904621583 | 2.314389387 |

|                              |   |   |   |   |   |             |             |             |             |             |             |             |             |             |
|------------------------------|---|---|---|---|---|-------------|-------------|-------------|-------------|-------------|-------------|-------------|-------------|-------------|
| TCGA-BP-4769-01A-01R-1289-07 | 0 | 2 | 1 | 1 | 0 | 0.214467826 | 0.02703185  | 2.477500791 | 1.438084657 | 0.804984216 | 0.233908903 | 3.465114017 | 5.008822179 | 3.921961839 |
| TCGA-BP-4770-01A-01R-1503-07 | 1 | 4 | 1 | 1 | 3 | 0           | 0.115498451 | 0.763004799 | 0.685725612 | 0.473312675 | 0.043085295 | 1.93373767  | 5.484153485 | 1.841911236 |
| TCGA-BP-4771-01A-01R-1289-07 | 0 | 4 | 1 | 2 | 2 | 0.877373557 | 0.022443967 | 3.953096878 | 3.559291108 | 2.104850452 | 1.063322131 | 2.992445061 | 4.499744605 | 2.899611034 |
| TCGA-BP-4774-01A-01R-1289-07 | 0 | 2 | 1 | 1 | 0 | 2.131427574 | 3.511517179 | 2.782780713 | 3.024805395 | 1.210697535 | 0.791808165 | 2.881715174 | 4.159891395 | 5.906239554 |
| TCGA-BP-4777-01A-01R-1289-07 | 0 | 3 | 1 | 1 | 0 | 0.997867369 | 0.021774719 | 2.16369065  | 1.219954871 | 1.238479344 | 0.452440925 | 2.409806333 | 4.284873633 | 3.399500069 |
| TCGA-BP-4781-01A-01R-1305-07 | 1 | 3 | 1 | 1 | 0 | 0.381001026 | 0.009768136 | 1.725982615 | 0.682115006 | 0.596776349 | 0.093453716 | 2.753986866 | 4.366488488 | 3.318849579 |
| TCGA-BP-4784-01A-01R-1305-07 | 1 | 2 | 1 | 1 | 0 | 0.216212791 | 1.436291613 | 1.490989375 | 0.719595486 | 0.584613726 | 0.08425615  | 4.091294575 | 5.058474976 | 2.594424298 |
| TCGA-BP-4787-01A-01R-1305-07 | 0 | 4 | 1 | 2 | 2 | 0.215811305 | 2.906080166 | 2.043176883 | 2.079680694 | 1.122451154 | 0.336795332 | 1.772530668 | 4.367322472 | 2.002867832 |
| TCGA-BP-4789-01A-01R-1305-07 | 0 | 2 | 1 | 1 | 0 | 0.345854707 | 0.018548232 | 1.617636588 | 1.578517102 | 0.895403344 | 0.169620048 | 4.035408788 | 4.839155687 | 2.548917994 |
| TCGA-BP-4790-01A-01R-1305-07 | 1 | 2 | 1 | 1 | 0 | 0.62494637  | 0.079796989 | 1.910753445 | 1.868105228 | 1.373273918 | 0.222131765 | 2.955911866 | 4.956381501 | 2.513745928 |
| TCGA-BP-4795-01A-02R-1420-07 | 1 | 2 | 1 | 1 | 0 | 0           | 1.378547364 | 1.045384294 | 0.762656419 | 0.345730371 | 0.099929876 | 2.690250176 | 5.02445717  | 3.029019819 |
| TCGA-BP-4797-01A-01R-1305-07 | 0 | 3 | 1 | 1 | 2 | 0           | 0.002830028 | 1.128244096 | 0.551785924 | 0.477773797 | 0.128083384 | 1.829846913 | 4.194867801 | 2.707276508 |
| TCGA-BP-4799-01A-01R-1305-07 | 1 | 3 | 1 | 1 | 2 | 0           | 0.016889951 | 0.21925386  | 0.280877853 | 0.153744084 | 0.103315533 | 1.512596069 | 4.546268309 | 2.158520539 |
| TCGA-BP-4804-01A-02R-1305-07 | 0 | 2 | 1 | 1 | 0 | 0.522286465 | 0.038386699 | 2.038832196 | 2.070051813 | 0.509707602 | 0.413876018 | 2.995894216 | 4.547302794 | 3.036956483 |
| TCGA-BP-4807-01A-01R-1305-07 | 0 | 3 | 1 | 1 | 0 | 0           | 0.018248614 | 1.725276818 | 0.323882332 | 0.279938506 | 0.12026787  | 2.982712393 | 4.594876709 | 2.691322779 |
| TCGA-BP-4959-01A-01R-1334-07 | 0 | 3 | 1 | 1 | 0 | 0           | 0.004551918 | 0.938202643 | 0.535943413 | 0.472905803 | 0.157754901 | 1.843567457 | 4.159166594 | 2.500139361 |
| TCGA-BP-4960-01A-01R-1334-07 | 0 | 3 | 1 | 1 | 1 | 2.323957111 | 0.006482473 | 2.344797882 | 2.072321789 | 0.844721638 | 0.969521284 | 2.347728306 | 3.970290673 | 2.810835309 |
| TCGA-BP-4961-01A-01R-1334-07 | 0 | 2 | 1 | 1 | 0 | 0           | 0.00174658  | 2.064397644 | 2.153518598 | 0.6173566   | 0.401353566 | 3.268714573 | 4.672239782 | 3.517876691 |
| TCGA-BP-4962-01A-01R-1334-07 | 0 | 2 | 1 | 1 | 1 | 0           | 0.002959709 | 1.163707391 | 0.857676029 | 0.295301303 | 0.172882101 | 2.689555348 | 4.348832003 | 2.318719422 |
| TCGA-BP-4963-01A-01R-1334-07 | 0 | 3 | 1 | 1 | 0 | 1.939517774 | 0.001149033 | 2.11117615  | 3.097958683 | 0.958891971 | 0.678300069 | 2.432100977 | 4.365907312 | 3.300842541 |
| TCGA-BP-4964-01A-01R-1334-07 | 0 | 2 | 1 | 1 | 0 | 0.649716407 | 3.604388996 | 2.124121486 | 1.899379413 | 0.63399768  | 0.549431327 | 3.04534336  | 3.997076358 | 2.341084278 |
| TCGA-BP-4965-01A-01R-1334-07 | 0 | 2 | 1 | 1 | 0 | 0.35074225  | 0.000743541 | 0.951638719 | 1.303238084 | 0.51242405  | 0.270675457 | 2.606181267 | 4.475367959 | 2.156454783 |
| TCGA-BP-4967-01A-01R-1334-07 | 1 | 2 | 1 | 1 | 2 | 1.092015578 | 0.000917198 | 2.781715376 | 1.893796925 | 0.959344043 | 0.98714967  | 2.828383377 | 4.468971664 | 2.485801529 |
| TCGA-BP-4969-01A-01R-1334-07 | 0 | 2 | 1 | 1 | 0 | 1.304671035 | 3.864633631 | 2.345607613 | 3.22898889  | 2.53447539  | 1.117411182 | 3.840974107 | 3.607149309 | 2.500155499 |
| TCGA-BP-4970-01A-01R-1334-07 | 0 | 3 | 1 | 1 | 0 | 0           | 0.00232406  | 1.116680309 | 0.173142878 | 0.356086417 | 0.217381806 | 2.407115225 | 4.680613728 | 2.972934923 |
| TCGA-BP-4972-01A-01R-1334-07 | 0 | 3 | 1 | 1 | 2 | 0.344986407 | 3.09722207  | 2.041677728 | 1.546456704 | 1.106738763 | 0.413334288 | 3.25599348  | 4.52259402  | 2.593554555 |
| TCGA-BP-4973-01A-01R-1334-07 | 0 | 3 | 1 | 1 | 2 | 1.42443531  | 0.004260284 | 2.593825273 | 2.172656994 | 1.870685576 | 0.987352635 | 3.191253009 | 4.188726773 | 1.78068882  |
| TCGA-BP-4974-01A-01R-1334-07 | 0 | 4 | 1 | 2 | 2 | 1.841982435 | 4.60782408  | 2.715397492 | 2.495640201 | 1.913236651 | 1.057498907 | 3.841408617 | 4.614925532 | 4.640054345 |
| TCGA-BP-4977-01A-01R-1334-07 | 0 | 3 | 1 | 1 | 0 | 0.93019234  | 0.005495412 | 1.507915587 | 2.208554746 | 1.460824202 | 0.81054052  | 3.13590707  | 4.58749811  | 2.15984592  |
| TCGA-BP-4983-01A-01R-1334-07 | 1 | 4 | 1 | 1 | 2 | 1.415052274 | 4.47551773  | 2.218803341 | 2.655175976 | 0.548994354 | 0.908110607 | 3.672623234 | 4.732338543 | 3.260595907 |
| TCGA-BP-4986-01A-01R-1334-07 | 1 | 3 | 1 | 1 | 0 | 0           | 0.004707224 | 3.528616454 | 2.498926689 | 1.627591588 | 0.662725934 | 1.93973361  | 4.685920132 | 4.122451741 |
| TCGA-BP-4987-01A-01R-1334-07 | 0 | 2 | 1 | 1 | 0 | 0.719155168 | 4.173861106 | 3.333416105 | 2.454292512 | 1.022446188 | 0.742485524 | 3.449932158 | 4.622503033 | 2.341198164 |
| TCGA-BP-4989-01A-01R-1334-07 | 0 | 3 | 1 | 1 | 2 | 1.315170636 | 0.009021148 | 3.035279928 | 3.449180653 | 1.636372921 | 1.190922276 | 2.194541859 | 4.282500851 | 3.783438297 |
| TCGA-BP-4992-01A-01R-1334-07 | 1 | 4 | 1 | 1 | 0 | 2.289295912 | 0.017707483 | 4.145359517 | 4.009158742 | 3.140370176 | 1.755985646 | 2.932108326 | 3.606548314 | 5.114552317 |
| TCGA-BP-4993-01A-02R-1420-07 | 0 | 3 | 1 | 1 | 0 | 0.395124999 | 0.002551925 | 2.229288736 | 0.704972322 | 0.740404338 | 0.198980384 | 3.351822202 | 4.327969362 | 3.040236118 |
| TCGA-BP-4995-01A-01R-1334-07 | 1 | 3 | 1 | 1 | 0 | 0.378417578 | 0.002429385 | 0.38445687  | 1.519108773 | 0.908149518 | 0.785978668 | 2.406244173 | 5.476011561 | 3.90126985  |
| TCGA-BP-4998-01A-01R-1334-07 | 0 | 3 | 1 | 1 | 0 | 1.300317592 | 0.001823349 | 1.559596236 | 1.485636671 | 1.069171825 | 0.923665792 | 2.958427615 | 4.656961234 | 2.334390802 |
| TCGA-BP-5000-01A-01R-1334-07 | 0 | 3 | 1 | 1 | 0 | 0.475893795 | 0.730124735 | 1.92036674  | 2.161435076 | 0.613462009 | 0.460575985 | 1.994570468 | 3.951902136 | 2.840168812 |
| TCGA-BP-5001-01A-01R-1334-07 | 0 | 2 | 1 | 1 | 0 | 1.170515049 | 2.679336648 | 3.188972238 | 2.939522901 | 0.923798323 | 1.273869306 | 2.579607573 | 3.583391284 | 4.472996844 |
| TCGA-BP-5004-01A-01R-1334-07 | 0 | 3 | 1 | 1 | 0 | 1.41897958  | 0.000847933 | 2.241343681 | 1.562160349 | 1.608022347 | 0.751745096 | 2.331064899 | 4.499813873 | 4.010784033 |
| TCGA-BP-5006-01A-01R-1334-07 | 0 | 2 | 1 | 1 | 0 | 0.56808617  | 0.002931101 | 1.981113136 | 1.291407103 | 0.51226895  | 0.394100133 | 3.189426362 | 4.20686195  | 4.192975615 |
| TCGA-BP-5008-01A-01R-1334-07 | 0 | 2 | 1 | 1 | 0 | 0.938700242 | 0.00278452  | 2.243022735 | 0.818850949 | 0.768765149 | 0.536692595 | 2.787041199 | 4.468270009 | 4.150884765 |
| TCGA-BP-5009-01A-01R-1334-07 | 0 | 3 | 1 | 1 | 0 | 0.434590484 | 0.003794808 | 2.232197674 | 2.693364281 | 1.660462635 | 0.41143913  | 1.995370597 | 4.064586112 | 3.291977101 |
| TCGA-BP-5169-01A-01R-1426-07 | 1 | 4 | 1 | 1 | 0 | 1.423012411 | 0.006799752 | 1.136463114 | 2.771678687 | 0.397049283 | 0.328996854 | 2.285342966 | 3.239039028 | 2.126923932 |
| TCGA-BP-5170-01A-01R-1426-07 | 0 | 2 | 1 | 1 | 0 | 0           | 0.005462005 | 0.426148819 | 0           | 0.442189495 | 0.025645186 | 4.278960276 | 4.023340581 | 2.283154683 |
| TCGA-BP-5173-01A-01R-1426-07 | 1 | 2 | 1 | 1 | 0 | 0           | 0.002210704 | 1.078225797 | 0.788875422 | 0.849215314 | 0.14894973  | 3.829256142 | 4.614869338 | 1.982973892 |
| TCGA-BP-5174-01A-01R-1426-07 | 0 | 2 | 1 | 1 | 0 | 0.359684594 | 2.684916401 | 1.725238367 | 1.432356583 | 0.667163772 | 0.290642178 | 2.285561913 | 3.430376571 | 1.969114783 |
| TCGA-BP-5175-01A-01R-1426-07 | 0 | 3 | 1 | 1 | 0 | 0.362087683 | 0.002310967 | 2.255841723 | 1.872889766 | 0.189571883 | 0.362340882 | 1.868296216 | 2.977252317 | 3.041519064 |
| TCGA-BP-5176-01A-01R-1426-07 | 1 | 2 | 1 | 1 | 0 | 0           | 1.764780991 | 1.501791204 | 0.970550463 | 0.310431536 | 0.045261114 | 2.770198283 | 4.025501557 | 2.240385465 |
| TCGA-BP-5180-01A-01R-1426-07 | 0 | 2 | 1 | 1 | 0 | 0           | 0.003118112 | 1.432323919 | 1.610467501 | 0.677272864 | 0.113489177 | 2.651534328 | 3.680276631 | 1.671541768 |
| TCGA-BP-5181-01A-01R-1426-07 | 0 | 2 | 1 | 1 | 0 | 0           | 1.951297136 | 0.92254578  | 0.475991853 | 0.190845884 | 0.080138707 | 3.309323096 | 4.126634697 | 1.523452567 |
| TCGA-BP-5183-01A-01R-1426-07 | 0 | 3 | 1 | 1 | 2 | 0.882595135 | 0.008184544 | 2.092311826 | 1.364508391 | 1.369686956 | 0.519427397 | 2.368065044 | 4.073321975 | 2.167888187 |
| TCGA-BP-5184-01A-01R-1426-07 | 0 | 3 | 1 | 1 | 0 | 0           | 0.001484972 | 0.246829484 | 0.983612369 | 0.763639596 | 0.103883282 | 3.290803513 | 4.619756983 | 2.827248971 |
| TCGA-BP-5185-01A-01R-1426-07 | 0 | 3 | 1 | 1 | 0 | 0.283902525 | 0.007035434 | 1.581564354 | 1.85192094  | 0.981195342 | 0.304500701 | 2.5329517   | 3.105193185 | 2.156643771 |
| TCGA-BP-5186-01A-01R-1426-07 | 0 | 2 | 1 | 1 | 0 | 0.192915556 | 3.408322392 | 1.458420177 | 1.539838253 | 0.603645167 | 0.194656556 | 2.38172673  | 4.561920524 | 2.568445607 |
| TCGA-BP-5187-01A-01R-1426-07 | 0 | 2 | 1 | 1 | 0 | 0.322469237 | 0.03609489  | 0.327713727 | 0.415713896 | 0.505554871 | 0.163225338 | 2.972712809 | 4.571471405 | 2.380955991 |
| TCGA-BP-5189-01A-02R-1426-07 | 0 | 4 | 1 | 1 | 0 | 0           | 0.003643754 | 1.131808144 | 0.879738592 | 0.509608628 | 0.294411767 | 1.711910306 | 4.202151051 | 2.704043319 |
| TCGA-BP-5191-01A-01R-1426-07 | 1 | 2 | 1 | 1 | 2 | 0.230884464 | 0.002811288 | 1.72125295  | 0.760618473 | 0.789676811 | 0.302919149 | 2.373752799 | 3.605478972 | 1.8676839   |

|                              |   |   |   |   |   |             |             |             |             |             |             |             |             |             |
|------------------------------|---|---|---|---|---|-------------|-------------|-------------|-------------|-------------|-------------|-------------|-------------|-------------|
| TCGA-BP-5194-01A-02R-1426-07 | 0 | 2 | 1 | 1 | 0 | 0.147432125 | 0.00435487  | 1.140829978 | 1.003049543 | 0.411097782 | 0.108545151 | 3.515938305 | 4.386233303 | 1.981904443 |
| TCGA-BP-5195-01A-02R-1426-07 | 1 | 2 | 1 | 1 | 0 | 0.326541301 | 0.00308553  | 1.27644857  | 0.884932423 | 0.821079082 | 0.103311851 | 2.351044878 | 4.644757672 | 2.889832309 |
| TCGA-BP-5196-01A-01R-1426-07 | 0 | 2 | 1 | 1 | 0 | 0           | 0.001244441 | 2.508625321 | 2.66075938  | 1.163162569 | 0.572314339 | 2.018624582 | 4.114193301 | 3.317361774 |
| TCGA-BP-5199-01A-01R-1426-07 | 0 | 4 | 1 | 1 | 1 | 1.177767518 | 0.001022962 | 2.789100543 | 3.042115879 | 1.238483639 | 0.644721485 | 4.058888209 | 4.330480497 | 3.384799079 |
| TCGA-BP-5200-01A-01R-1426-07 | 0 | 4 | 1 | 1 | 1 | 0.595027832 | 0.001654519 | 0.699320897 | 0.347402133 | 0.092972184 | 0.129669134 | 1.840689241 | 4.501102538 | 4.297318167 |
| TCGA-BP-5202-01A-02R-1426-07 | 1 | 2 | 1 | 1 | 2 | 0.157284726 | 0.001866437 | 2.175817584 | 0.822043676 | 0.435312373 | 0.195173495 | 2.447233503 | 4.486669752 | 3.889582576 |
| TCGA-CJ-4634-01A-02R-1325-07 | 0 | 2 | 1 | 1 | 0 | 1.359990555 | 4.09631153  | 2.914722156 | 1.893691223 | 1.00078     | 0.490776939 | 2.823419659 | 4.410348852 | 2.933751193 |
| TCGA-CJ-4635-01A-02R-1305-07 | 0 | 3 | 1 | 1 | 0 | 0.496057878 | 0.050664794 | 4.180341777 | 3.57806773  | 2.165420375 | 0.706970775 | 2.940067289 | 4.418945894 | 2.650618375 |
| TCGA-CJ-4636-01A-02R-1325-07 | 0 | 3 | 1 | 1 | 2 | 0.474855485 | 0.038968472 | 1.131324538 | 2.292130912 | 1.80180541  | 0.934595166 | 2.673623308 | 4.424289    | 2.446728043 |
| TCGA-CJ-4638-01A-02R-1325-07 | 0 | 4 | 1 | 2 | 2 | 1.090106981 | 2.489462699 | 1.721961996 | 2.296755121 | 1.077161382 | 2.035422062 | 2.99497793  | 3.357621955 | 2.014439957 |
| TCGA-CJ-4639-01A-02R-1325-07 | 0 | 2 | 1 | 1 | 1 | 0.562177255 | 4.366455987 | 0.78888533  | 0.709579795 | 1.768090217 | 0.669766622 | 3.894633596 | 4.443632876 | 2.097482295 |
| TCGA-CJ-4641-01A-02R-1325-07 | 0 | 4 | 1 | 2 | 2 | 0.584515657 | 3.844626093 | 1.236532118 | 1.783319797 | 1.572210526 | 0.847434868 | 2.290709263 | 4.42500146  | 3.270549694 |
| TCGA-CJ-4643-01A-02R-1325-07 | 1 | 3 | 1 | 1 | 1 | 1.783270945 | 4.73008894  | 2.50599034  | 1.803202384 | 1.533842331 | 1.078571963 | 2.47557793  | 4.816414542 | 2.963432184 |
| TCGA-CJ-4644-01A-02R-1325-07 | 0 | 3 | 1 | 2 | 2 | 0           | 1.63859914  | 0.998378817 | 0.284234252 | 0.260690895 | 0.037082186 | 2.459541008 | 4.697158229 | 1.92350801  |
| TCGA-CJ-4868-01A-01R-1305-07 | 0 | 3 | 1 | 2 | 2 | 0.455111029 | 0.00899236  | 1.707432186 | 1.689446699 | 0.557304781 | 0.17390381  | 2.778305735 | 4.128216924 | 2.672824156 |
| TCGA-CJ-4869-01A-02R-1426-07 | 0 | 2 | 1 | 1 | 1 | 0.168019241 | 0           | 0.70381218  | 0.730093044 | 0.419438058 | 0.103512838 | 2.183830702 | 4.465071028 | 2.484339154 |
| TCGA-CJ-4870-01A-01R-1305-07 | 0 | 2 | 1 | 1 | 2 | 0           | 1.577000613 | 2.465108623 | 0.286059898 | 0.2363493   | 0.089627875 | 4.618751221 | 4.399793679 | 2.567864455 |
| TCGA-CJ-4871-01A-01R-1305-07 | 0 | 4 | 1 | 2 | 2 | 0           | 0.010240575 | 0.895669418 | 1.210770035 | 0.509272817 | 0.110813862 | 1.873783547 | 4.426735492 | 2.398905269 |
| TCGA-CJ-4872-01A-01R-1305-07 | 0 | 4 | 1 | 1 | 0 | 0.78055106  | 0.01735265  | 0.36998012  | 1.721118017 | 0.739959895 | 0.375749198 | 2.556940717 | 4.562211029 | 2.214122317 |
| TCGA-CJ-4873-01A-01R-1305-07 | 1 | 3 | 1 | 1 | 2 | 1.755922222 | 2.814782799 | 2.795265916 | 2.931297821 | 0.889465324 | 0.968702897 | 2.494457481 | 3.705865477 | 2.817124867 |
| TCGA-CJ-4878-01A-01R-1305-07 | 1 | 2 | 1 | 1 | 2 | 2.775154283 | 4.201457606 | 4.082553709 | 2.941211982 | 1.427852641 | 1.040966796 | 3.511234102 | 4.218929958 | 3.358352509 |
| TCGA-CJ-4882-01A-02R-1426-07 | 0 | 3 | 1 | 1 | 2 | 1.200809525 | 0.101620766 | 1.679798096 | 1.2886448   | 1.020575587 | 0.55736336  | 3.75225168  | 4.777912878 | 2.9429324   |
| TCGA-CJ-4884-01A-01R-1305-07 | 1 | 3 | 1 | 1 | 2 | 0.7168189   | 3.731630407 | 3.036996515 | 2.355790393 | 1.441506974 | 0.769331224 | 2.555101519 | 4.308543477 | 3.10171201  |
| TCGA-CJ-4886-01A-01R-1305-07 | 0 | 3 | 1 | 1 | 0 | 0.207326596 | 2.641810498 | 2.516191893 | 0.497867467 | 1.194526017 | 0.236263294 | 2.857277022 | 4.638912323 | 3.010869141 |
| TCGA-CJ-4887-01A-01R-1305-07 | 0 | 3 | 1 | 2 | 2 | 1.749845531 | 0.005099992 | 2.690202095 | 3.167109116 | 1.729094641 | 0.472907128 | 2.74016315  | 3.925630942 | 2.880569047 |
| TCGA-CJ-4888-01A-01R-1305-07 | 0 | 4 | 1 | 2 | 2 | 0.325479556 | 0.007163285 | 1.614219335 | 1.51395889  | 1.119779804 | 0.363902641 | 2.092567366 | 4.611958093 | 2.928205906 |
| TCGA-CJ-4890-01A-01R-1305-07 | 1 | 4 | 1 | 2 | 2 | 0           | 0.009280381 | 1.117228287 | 1.239451618 | 1.2570863   | 0.275246907 | 2.177182835 | 4.659262273 | 2.95034074  |
| TCGA-CJ-4891-01A-01R-1305-07 | 0 | 4 | 1 | 1 | 2 | 1.17201262  | 1.83645358  | 2.138416662 | 1.313444979 | 1.075592462 | 0.323761818 | 1.929991215 | 3.468205289 | 3.110385879 |
| TCGA-CJ-4894-01A-01R-1305-07 | 0 | 3 | 1 | 1 | 2 | 0.186517586 | 0.005583598 | 2.1284737   | 2.108465033 | 1.710953451 | 0.868916474 | 3.111891005 | 4.394003897 | 2.255133461 |
| TCGA-CJ-4900-01A-01R-1334-07 | 1 | 4 | 1 | 2 | 3 | 1.187883384 | 2.433469406 | 1.84913641  | 2.361453116 | 1.205351977 | 0.966533204 | 2.676709713 | 3.778475411 | 2.964923847 |
| TCGA-CJ-4901-01A-01R-1426-07 | 0 | 3 | 1 | 1 | 2 | 0.377815782 | 0.007262797 | 0           | 1.675997888 | 0.527174872 | 0.636121748 | 2.639703671 | 3.920718391 | 2.629425996 |
| TCGA-CJ-4903-01A-01R-1426-07 | 0 | 3 | 1 | 1 | 0 | 0.663101592 | 0           | 0.672734912 | 1.595857788 | 0.722899648 | 0.573206117 | 3.412762458 | 4.413932354 | 2.153531624 |
| TCGA-CJ-4905-01A-02R-1426-07 | 0 | 2 | 1 | 1 | 0 | 0           | 2.672973968 | 1.816657901 | 0.958913689 | 0.59157728  | 0.135168212 | 3.627103775 | 4.529894838 | 2.327152745 |
| TCGA-CJ-4912-01A-01R-1426-07 | 0 | 3 | 1 | 1 | 1 | 1.851041868 | 0.001509211 | 3.46612286  | 3.921776832 | 1.475187154 | 1.418295236 | 2.6521489   | 3.865846646 | 3.460906571 |
| TCGA-CJ-4916-01A-01R-1426-07 | 1 | 3 | 1 | 1 | 2 | 0.988595558 | 3.485472331 | 1.249720428 | 1.857850886 | 1.547286784 | 0.739015378 | 3.334272157 | 3.998435461 | 2.832631718 |
| TCGA-CJ-4918-01A-01R-1426-07 | 0 | 4 | 1 | 2 | 2 | 0           | 0.008965075 | 0.19052747  | 0.636579743 | 0.683999216 | 0.148046719 | 3.748653119 | 4.619996612 | 2.701006743 |
| TCGA-CJ-5671-01A-11R-1541-07 | 0 | 3 | 1 | 1 | 0 | 0.208254172 | 0.002515685 | 0.396406669 | 1.025214544 | 0.26601824  | 0.06213623  | 2.581002556 | 4.229471527 | 2.31732142  |
| TCGA-CJ-5672-11A-01R-1541-07 | 1 | 3 | 1 | 1 | 0 | 0.165953145 | 0.001975263 | 0.581586629 | 0.722615441 | 0.48273662  | 0.113774383 | 2.307415857 | 5.719964928 | 3.302486478 |
| TCGA-CJ-5672-01A-11R-1541-07 | 1 | 3 | 1 | 1 | 0 | 0           | 0.028167088 | 1.478277944 | 0.664259508 | 0.359597276 | 0.218019458 | 2.503065193 | 3.841979622 | 2.381608296 |
| TCGA-CJ-5676-01A-11R-1541-07 | 0 | 3 | 1 | 1 | 2 | 0.246040768 | 0           | 1.33034676  | 1.798799912 | 0.354824508 | 0.114157694 | 2.738783705 | 4.061057122 | 2.688665644 |
| TCGA-CJ-5677-01A-11R-1541-07 | 0 | 4 | 1 | 2 | 2 | 0.454457648 | 1.273803053 | 0.646623124 | 1.310962635 | 0.371057006 | 0.143964704 | 1.962250668 | 4.085644488 | 2.339787113 |
| TCGA-CJ-5677-11A-01R-1541-07 | 0 | 4 | 1 | 2 | 2 | 0.188897329 | 2.567955199 | 0.192112893 | 0.950553756 | 0.557311308 | 0.190604408 | 1.770782959 | 5.269796676 | 4.066250641 |
| TCGA-CJ-5678-01A-11R-1541-07 | 0 | 3 | 1 | 2 | 1 | 0           | 0.001516625 | 0.96560343  | 2.390278496 | 0.447469651 | 0.1367983   | 3.894901677 | 3.863958622 | 2.655469905 |
| TCGA-CJ-5679-01A-11R-1541-07 | 1 | 4 | 1 | 1 | 2 | 0.242025565 | 0.193702217 | 1.314860775 | 0.981227062 | 0.506254469 | 0.099197368 | 1.811247882 | 4.033656474 | 2.21559166  |
| TCGA-CJ-5680-01A-11R-1541-07 | 0 | 4 | 1 | 2 | 2 | 0.374023423 | 2.34850174  | 1.410008471 | 0.670771472 | 0.543301289 | 0.177675712 | 2.623159375 | 4.336973886 | 1.701998666 |
| TCGA-CJ-5680-11A-01R-1541-07 | 0 | 4 | 1 | 2 | 2 | 0.549103257 | 3.231726769 | 0.557382955 | 1.020967848 | 0.69514026  | 0.301534728 | 2.134459193 | 5.489360106 | 3.512505462 |
| TCGA-CJ-5681-01A-11R-1541-07 | 0 | 3 | 1 | 2 | 2 | 0           | 0.357373008 | 2.453061061 | 1.38783765  | 0.374592454 | 0.394120248 | 1.144862654 | 5.022030678 | 2.686026279 |
| TCGA-CJ-5681-11A-01R-1541-07 | 0 | 3 | 1 | 2 | 2 | 0.788588567 | 1.652071506 | 0.63733817  | 1.555663939 | 1.083498695 | 0.29712689  | 1.525891714 | 5.080083619 | 3.607155228 |
| TCGA-CJ-5682-01A-11R-1541-07 | 0 | 4 | 1 | 2 | 2 | 0.25865236  | 0           | 1.137231381 | 0.607511076 | 0.236273989 | 0.049326277 | 3.136646177 | 4.904635809 | 2.229572327 |
| TCGA-CJ-5686-01A-11R-1672-07 | 0 | 3 | 1 | 1 | 0 | 0.454345727 | 3.195917412 | 0.587386105 | 0.990662128 | 0.723153376 | 0.240500267 | 2.643361252 | 4.150377044 | 2.07128558  |
| TCGA-CJ-5689-11A-01R-1541-07 | 1 | 4 | 1 | 1 | 0 | 0           | 0.001564971 | 0.478515337 | 0           | 0.494921262 | 0.081557425 | 1.955174598 | 5.335156968 | 3.913489643 |
| TCGA-CJ-5689-01A-11R-1541-07 | 1 | 4 | 1 | 1 | 0 | 0           | 0.001223054 | 0.206231681 | 1.142357149 | 0.289692259 | 0.056723255 | 2.510861922 | 4.376426592 | 2.65894131  |
| TCGA-CJ-6027-01A-11R-1672-07 | 1 | 4 | 1 | 1 | 0 | 0           | 0.004582638 | 0.365388813 | 0.81137638  | 0.723767028 | 0.13787752  | 2.081523819 | 4.234243633 | 2.331939233 |
| TCGA-CJ-6030-11A-01R-1672-07 | 0 | 3 | 1 | 1 | 0 | 0.414700889 | 0.006285895 | 0.15448696  | 0           | 0.398829699 | 0.145585497 | 1.964018157 | 5.122001564 | 3.311356284 |
| TCGA-CJ-6030-01A-11R-1672-07 | 0 | 3 | 1 | 1 | 0 | 0.336535254 | 0.00212832  | 0.849992444 | 0.766033497 | 0.621697623 | 0.149726971 | 1.972890603 | 4.377249316 | 1.699001258 |
| TCGA-CJ-6031-01A-11R-1672-07 | 0 | 3 | 1 | 1 | 0 | 0           | 0.002161361 | 0.346705071 | 0.439076371 | 0.315440161 | 0.066618208 | 2.886722042 | 4.160058883 | 2.000790893 |
| TCGA-CJ-6032-01A-11R-1672-07 | 0 | 3 | 1 | 1 | 1 | 0.311640506 | 2.851288931 | 2.10911951  | 0.71631653  | 0.560461944 | 0.098245346 | 1.74789661  | 4.034927941 | 4.053182177 |
| TCGA-CJ-6033-01A-11R-1672-07 | 0 | 4 | 1 | 2 | 2 | 0           | 1.63766024  | 1.366111813 | 0.755913034 | 0.494830203 | 0.089558962 | 2.575213288 | 3.944922927 | 2.500661789 |



|                              |   |   |   |   |   |             |             |             |             |             |             |             |             |             |
|------------------------------|---|---|---|---|---|-------------|-------------|-------------|-------------|-------------|-------------|-------------|-------------|-------------|
| TCGA-CW-5583-01A-02R-1541-07 | 0 | 2 | 1 | 1 | 0 | 0.591676772 | 4.052905985 | 2.592899459 | 0.883617215 | 0.861111345 | 0.135909752 | 3.639381295 | 4.348544954 | 2.210209391 |
| TCGA-CW-5584-01A-01R-1541-07 | 1 | 3 | 1 | 1 | 2 | 0.192034205 | 0           | 1.375501747 | 1.219597744 | 0.361725853 | 0.077900938 | 2.434982268 | 4.577493658 | 1.951469577 |
| TCGA-CW-5584-11A-01R-1541-07 | 1 | 3 | 1 | 1 | 2 | 0.404722189 | 0           | 0           | 0.898059128 | 0.520970687 | 0.088273477 | 2.073673197 | 5.414428857 | 3.512936146 |
| TCGA-CW-5585-01A-01R-1541-07 | 0 | 2 | 1 | 2 | 2 | 0.453036218 | 0           | 1.809073543 | 1.400339192 | 0.618761727 | 0.182756145 | 3.421634393 | 4.123308616 | 1.844879256 |
| TCGA-CW-5587-11A-01R-1541-07 | 0 | 2 | 1 | 1 | 2 | 0           | 1.571991569 | 0           | 0.436951964 | 0.317859889 | 0.091925232 | 1.78300603  | 5.228986222 | 3.159641473 |
| TCGA-CW-5587-01A-01R-1541-07 | 0 | 2 | 1 | 1 | 2 | 0.346023631 | 2.30351143  | 1.250903187 | 0.928660909 | 0.25092362  | 0.109988351 | 2.115276136 | 4.243064165 | 1.899086387 |
| TCGA-CW-5588-01A-01R-1541-07 | 1 | 2 | 1 | 1 | 0 | 0           | 0.60992489  | 0.214415295 | 1.035024553 | 0.240744691 | 0.043572797 | 2.745788295 | 4.563847738 | 2.114089387 |
| TCGA-CW-5589-11A-01R-1541-07 | 0 | 2 | 1 | 1 | 0 | 0.185941935 | 0.002228683 | 0           | 0.793812968 | 0.460241542 | 0.085309265 | 2.448138683 | 5.364664822 | 3.761130076 |
| TCGA-CW-6087-11A-01R-1672-07 | 0 | 4 | 1 | 2 | 2 | 0           | 0.000957692 | 0           | 1.072392398 | 0.505766837 | 0.194626227 | 2.164018877 | 5.095042539 | 2.741296913 |
| TCGA-CW-6087-01A-11R-1672-07 | 0 | 4 | 1 | 2 | 2 | 0.151007964 | 0.001788038 | 0           | 0.667670967 | 0.22534881  | 0.098101355 | 1.861500567 | 5.08952751  | 2.048674182 |
| TCGA-CW-6088-01A-11R-1672-07 | 0 | 2 | 1 | 1 | 0 | 0.785253152 | 0           | 0.576310789 | 1.468999335 | 0.842466868 | 0.87074812  | 2.368613269 | 4.817564485 | 2.879362729 |
| TCGA-CW-6088-11A-01R-1672-07 | 0 | 2 | 1 | 1 | 0 | 0.269066057 | 0.000830845 | 0.143233572 | 1.157150409 | 0.705685939 | 0.494224498 | 2.294421697 | 5.988953808 | 3.072029182 |
| TCGA-CW-6093-01A-11R-1672-07 | 1 | 0 | 1 | 1 | 0 | 0.503878394 | 0           | 0.511590369 | 1.201952621 | 0.86850692  | 0.226881117 | 3.228409258 | 4.575059324 | 3.505734741 |
| TCGA-CZ-4853-01A-01R-1426-07 | 1 | 2 | 1 | 1 | 0 | 0.898532584 | 0.00349869  | 2.518374178 | 1.287047587 | 1.192359564 | 0.469460273 | 3.170765857 | 3.809445526 | 1.583753112 |
| TCGA-CZ-4854-01A-01R-1305-07 | 1 | 2 | 1 | 1 | 0 | 1.594589478 | 0.018442175 | 2.634731898 | 2.633973303 | 1.581207125 | 0.748339311 | 3.298398402 | 4.74470267  | 2.415231672 |
| TCGA-CZ-4857-01A-01R-1305-07 | 0 | 3 | 1 | 2 | 2 | 0.915744436 | 0.004305919 | 2.365200269 | 2.686491416 | 1.41954548  | 0.556897921 | 2.062278362 | 4.203827139 | 2.46006717  |
| TCGA-CZ-4858-01A-01R-1305-07 | 0 | 4 | 1 | 1 | 1 | 0.232962292 | 0.011321278 | 2.300270673 | 2.171498991 | 1.216019437 | 0.250176776 | 2.898241063 | 4.28278253  | 1.206682195 |
| TCGA-CZ-4859-01A-02R-1426-07 | 0 | 2 | 1 | 1 | 0 | 0           | 2.206786583 | 1.923571825 | 0.525062627 | 0.183897405 | 0.049619526 | 3.406971091 | 4.046244417 | 2.410942269 |
| TCGA-CZ-4860-01A-01R-1305-07 | 0 | 4 | 1 | 2 | 3 | 0.180669593 | 0.016132883 | 2.222667623 | 0.236192257 | 0.610780223 | 0.148872591 | 3.364873356 | 4.058671087 | 1.245551544 |
| TCGA-CZ-4862-01A-01R-1305-07 | 0 | 2 | 1 | 1 | 0 | 0.841980037 | 0.676150593 | 2.079863236 | 1.510550172 | 1.58723527  | 0.652637972 | 2.646228844 | 5.207394631 | 2.708499148 |
| TCGA-CZ-4863-01A-01R-1503-07 | 0 | 3 | 1 | 1 | 2 | 1.503437913 | 2.714654927 | 2.964737192 | 2.377036624 | 1.039452476 | 0.673020442 | 2.464927848 | 4.440680713 | 3.170640021 |
| TCGA-CZ-4864-11A-01R-1503-07 | 1 | 3 | 1 | 1 | 1 | 0           | 0.003741124 | 0.304782526 | 0.944204305 | 0.339247896 | 0.198271018 | 1.916532843 | 5.086555085 | 3.91968712  |
| TCGA-CZ-4865-01A-02R-1503-07 | 1 | 2 | 1 | 1 | 0 | 0           | 2.315539959 | 0.657458522 | 1.176312296 | 0.304197288 | 0.142452343 | 2.111062371 | 4.739300152 | 3.082064034 |
| TCGA-CZ-5451-11A-01R-1503-07 | 1 | 3 | 1 | 1 | 1 | 0.154701058 | 0           | 0.546952013 | 0.380554893 | 0.275386258 | 0.156115581 | 2.254769203 | 5.25286714  | 3.903814253 |
| TCGA-CZ-5451-01A-01R-1503-07 | 1 | 3 | 1 | 1 | 1 | 0           | 0.001461921 | 1.680046432 | 0.783811062 | 0.275661702 | 0.045383808 | 3.329132263 | 4.247439906 | 2.205918419 |
| TCGA-CZ-5452-11A-01R-1503-07 | 1 | 2 | 1 | 1 | 1 | 0.187568304 | 0.085229357 | 0.771323437 | 0.945320792 | 0.486458936 | 0.128893418 | 2.897084834 | 5.953733253 | 3.43239732  |
| TCGA-CZ-5452-01A-01R-1503-07 | 1 | 2 | 1 | 1 | 1 | 0.660294164 | 0.001175865 | 2.989820652 | 1.645310182 | 0.543856179 | 0.278967331 | 2.574299118 | 3.840758491 | 2.127274639 |
| TCGA-CZ-5453-11A-01R-1503-07 | 1 | 2 | 1 | 1 | 1 | 0           | 0           | 0           | 0.543440759 | 0.720641992 | 0.096091088 | 1.985372512 | 6.093916086 | 3.539701754 |
| TCGA-CZ-5454-01A-01R-1503-07 | 0 | 2 | 1 | 2 | 1 | 0           | 0           | 0.397994749 | 0.978689202 | 0.384930728 | 0.090143715 | 4.465488569 | 3.870178363 | 1.802720373 |
| TCGA-CZ-5455-01A-01R-1503-07 | 0 | 4 | 1 | 2 | 2 | 0           | 0.001566229 | 1.188579217 | 1.194499176 | 0.540960388 | 0.195997822 | 2.094599107 | 4.496149454 | 2.732916062 |
| TCGA-CZ-5455-11A-01R-1503-07 | 0 | 4 | 1 | 2 | 2 | 0           | 0.001878297 | 0.669146058 | 0.207340955 | 0.306317378 | 0.029322559 | 2.128775247 | 5.659366625 | 3.316300066 |
| TCGA-CZ-5456-11A-02R-1503-07 | 0 | 3 | 1 | 1 | 1 | 0           | 0           | 1.005660863 | 0.611576806 | 0.702463982 | 0.097791982 | 1.773520112 | 5.667111996 | 3.770393492 |
| TCGA-CZ-5456-01A-01R-1503-07 | 0 | 3 | 1 | 1 | 1 | 0.361545236 | 0.004610428 | 0.659887096 | 1.097074827 | 0.443836482 | 0.095051688 | 1.960679845 | 4.715898655 | 1.844180698 |
| TCGA-CZ-5457-01A-01R-1503-07 | 0 | 4 | 1 | 1 | 2 | 0           | 0.001871947 | 1.041693854 | 0.823893606 | 0.264356898 | 0.037877467 | 4.655942687 | 4.651795441 | 1.997924637 |
| TCGA-CZ-5457-11A-01R-1503-07 | 0 | 4 | 1 | 1 | 2 | 0           | 0           | 0.31974806  | 0.217174446 | 0.363744629 | 0.081709038 | 2.552876602 | 5.48312087  | 3.434549933 |
| TCGA-CZ-5460-01A-01R-1503-07 | 0 | 2 | 1 | 2 | 2 | 0.178766139 | 0           | 2.544806623 | 1.791781101 | 0.515164411 | 0.278143617 | 2.785803433 | 4.099486278 | 2.034710673 |
| TCGA-CZ-5461-11A-01R-1503-07 | 0 | 4 | 1 | 2 | 0 | 0           | 0.000817982 | 0           | 0           | 0.425262001 | 0.085128661 | 1.611277761 | 5.752895775 | 3.413729761 |
| TCGA-CZ-5462-11A-01R-1503-07 | 1 | 3 | 1 | 2 | 0 | 0           | 0           | 0.547457101 | 0.884478234 | 0.334157005 | 0.013833121 | 2.560753271 | 6.030425309 | 2.962310236 |
| TCGA-CZ-5462-01A-01R-1503-07 | 1 | 3 | 1 | 2 | 0 | 0.315643611 | 0           | 1.750875506 | 0.72436913  | 0.396711    | 0.167952718 | 1.596280675 | 4.407304996 | 3.291693254 |
| TCGA-CZ-5463-11A-01R-1503-07 | 1 | 2 | 1 | 1 | 1 | 0           | 0.000925821 | 0.1587416   | 1.149595715 | 0.849694236 | 0.188552531 | 2.476169375 | 5.876228719 | 3.321652839 |
| TCGA-CZ-5464-01A-01R-1503-07 | 1 | 2 | 1 | 2 | 2 | 0.566704864 | 0.016483052 | 1.37413546  | 1.288896144 | 0.33383074  | 0.258236527 | 2.676229565 | 4.202021302 | 2.157188131 |
| TCGA-CZ-5465-01A-01R-1503-07 | 1 | 2 | 1 | 1 | 2 | 0.461977223 | 3.388320266 | 1.593366116 | 2.216757051 | 0.558821235 | 0.257673029 | 3.170245748 | 4.328608574 | 2.850251646 |
| TCGA-CZ-5466-11A-01R-1503-07 | 1 | 2 | 1 | 1 | 2 | 0           | 0.001559612 | 0.13486527  | 0.174177041 | 0.300449807 | 0.036427042 | 2.21467347  | 5.395426139 | 3.449826987 |
| TCGA-CZ-5467-01A-01R-1503-07 | 1 | 4 | 1 | 1 | 2 | 0.178257311 | 0.749659159 | 1.454595473 | 0.609816436 | 0.37671964  | 0.257835206 | 3.737301347 | 4.349519417 | 3.155825151 |
| TCGA-CZ-5468-11A-01R-1503-07 | 1 | 4 | 1 | 2 | 2 | 0           | 0           | 0.773305846 | 0.63896746  | 0.400195844 | 0.129302776 | 2.79625606  | 5.610525597 | 3.50140077  |
| TCGA-CZ-5469-11A-01R-1503-07 | 0 | 2 | 1 | 1 | 1 | 0           | 0           | 0.654969411 | 1.038015656 | 0.506799464 | 0.110987507 | 2.196679904 | 5.846802125 | 3.878492246 |
| TCGA-CZ-5469-01A-01R-1503-07 | 0 | 2 | 1 | 1 | 1 | 0.521021815 | 0.007035494 | 1.749330713 | 0.826422139 | 0.627121161 | 0.3790476   | 3.453700149 | 4.143176883 | 1.705913959 |
| TCGA-CZ-5470-11A-01R-1503-07 | 1 | 3 | 1 | 1 | 1 | 0           | 1.221150853 | 0.528076107 | 0.658843039 | 0.456464923 | 0.067720227 | 2.799392332 | 6.216355119 | 3.417958673 |
| TCGA-CZ-5470-01A-01R-1503-07 | 1 | 3 | 1 | 1 | 1 | 0.30949645  | 2.268615535 | 1.972143542 | 1.692977938 | 0.689809159 | 0.188861825 | 2.778071494 | 4.038588237 | 2.158427511 |
| TCGA-CZ-5982-11A-01R-1672-07 | 0 | 2 | 1 | 1 | 0 | 0           | 1.671329809 | 0.365416943 | 0.462026477 | 0.519791828 | 0.042767844 | 1.814616257 | 4.943770301 | 2.986137701 |
| TCGA-CZ-5984-01A-11R-1672-07 | 0 | 3 | 1 | 1 | 0 | 0.463924825 | 0           | 0.471120035 | 2.012322802 | 0.480084185 | 0.272942945 | 2.371478305 | 4.01551022  | 2.154551114 |
| TCGA-CZ-5985-11A-01R-1672-07 | 0 | 2 | 1 | 1 | 1 | 0.52320955  | 0           | 0           | 0.662538404 | 0.301327179 | 0.070844373 | 2.134796699 | 5.136875757 | 3.321006503 |
| TCGA-CZ-5986-01A-11R-1672-07 | 0 | 3 | 1 | 1 | 0 | 1.094442525 | 0.003676907 | 0           | 1.641193184 | 1.059086952 | 0.353340393 | 2.754362991 | 4.305208785 | 3.492378521 |
| TCGA-CZ-5986-11A-01R-1672-07 | 0 | 3 | 1 | 1 | 0 | 0           | 0           | 0.459845018 | 0.987811928 | 0.742471077 | 0.21412618  | 2.481688939 | 5.57071948  | 3.481714558 |
| TCGA-CZ-5987-01A-11R-1672-07 | 0 | 2 | 1 | 2 | 2 | 0.827376009 | 0.002091335 | 0           | 0.755660551 | 0.878258566 | 0.108002988 | 1.9466186   | 3.897926274 | 1.822488073 |
| TCGA-CZ-5987-11A-01R-1672-07 | 0 | 2 | 1 | 2 | 2 | 0           | 0.003697299 | 0           | 0.686037588 | 0.542990534 | 0.073924141 | 1.76106075  | 5.331192056 | 3.731265438 |
| TCGA-CZ-5988-11A-01R-1672-07 | 0 | 2 | 1 | 1 | 0 | 0           | 0.00155854  | 0           | 0.597344649 | 0.722106729 | 0.149294359 | 2.444263157 | 5.471700303 | 3.546578527 |
| TCGA-CZ-5988-01A-11R-1672-07 | 0 | 2 | 1 | 1 | 0 | 0.742847084 | 0.051836566 | 0           | 1.135724676 | 0.586896841 | 0.152300904 | 2.620617865 | 4.342156296 | 2.427221448 |

|                              |   |   |   |   |   |             |             |             |             |             |             |             |             |             |
|------------------------------|---|---|---|---|---|-------------|-------------|-------------|-------------|-------------|-------------|-------------|-------------|-------------|
| TCGA-CZ-5989-01A-11R-1672-07 | 0 | 2 | 1 | 1 | 1 | 0           | 0.001686318 | 0           | 0           | 1.580426325 | 0.225994342 | 1.180215377 | 5.077234774 | 2.806409725 |
| TCGA-CZ-5989-11A-01R-1672-07 | 0 | 2 | 1 | 1 | 1 | 0           | 0.002388011 | 0.201736332 | 1.469271187 | 0.923423934 | 0.156890299 | 2.368570516 | 6.139048816 | 3.728117759 |
| TCGA-DV-5565-01A-01R-1541-07 | 0 | 2 | 1 | 1 | 0 | 0.21598221  | 0.147948048 | 2.044108262 | 1.841534628 | 0.607181025 | 0.060612624 | 2.808781041 | 4.425221152 | 2.971746497 |
| TCGA-DV-5566-01A-01R-1541-07 | 1 | 2 | 1 | 1 | 0 | 0.271369153 | 1.754775718 | 1.730257525 | 1.800509629 | 0.612498376 | 0.102074253 | 2.447411353 | 4.050232603 | 3.254967035 |
| TCGA-DV-5568-01A-01R-1541-07 | 0 | 2 | 1 | 1 | 0 | 0           | 0           | 1.600216917 | 1.60728277  | 0.772792002 | 0.156011391 | 2.16035127  | 3.99952996  | 3.606646288 |
| TCGA-DV-5569-01A-01R-1541-07 | 0 | 2 | 1 | 1 | 0 | 0.523540319 | 2.800421846 | 1.22422417  | 0.473911282 | 0.315376887 | 0.191647175 | 3.055040966 | 3.980531511 | 3.330246532 |
| TCGA-DV-5574-01A-01R-1541-07 | 0 | 2 | 1 | 1 | 0 | 0           | 0           | 0.878411293 | 0.449900802 | 0.286989734 | 0.075158674 | 3.062489874 | 4.640030219 | 3.004685205 |
| TCGA-DV-5575-01A-01R-1541-07 | 0 | 2 | 1 | 1 | 0 | 0.220976496 | 2.618437649 | 1.59568528  | 1.072779063 | 0.699321487 | 0.152394636 | 3.245848233 | 4.401346242 | 2.697837489 |
| TCGA-DV-A4VX-01A-11R-A266-07 | 0 | 4 | 1 | 2 | 2 | 0.723864189 | 0.008777511 | 1.469465246 | 3.092477785 | 0.483272735 | 1.247004729 | 3.540021065 | 3.975491039 | 3.086626045 |
| TCGA-DV-A4VZ-01A-11R-A266-07 | 0 | 2 | 1 | 3 | 0 | 2.088380126 | 0.001464249 | 4.134156494 | 4.09955147  | 0.827987646 | 1.635135047 | 3.712173224 | 4.500507705 | 5.2101618   |
| TCGA-DV-A4W0-05A-11R-A266-07 | 0 | 3 | 1 | 1 | 0 | 0.692429347 | 0           | 3.312902543 | 2.839964437 | 1.547301342 | 0.736033706 | 3.426720316 | 5.064179235 | 3.023919801 |
| TCGA-DV-A4W0-01A-11R-A266-07 | 0 | 3 | 1 | 1 | 0 | 1.437035702 | 0           | 1.110446794 | 1.712310845 | 1.85154233  | 0.620807155 | 2.682355712 | 4.167041085 | 3.971679566 |
| TCGA-EU-5905-01A-11R-1672-07 | 1 | 3 | 1 | 1 | 0 | 0.304367909 | 1.71517762  | 2.19762     | 0.393053666 | 0.27840269  | 0.126350511 | 2.914321416 | 4.178191829 | 3.044485859 |
| TCGA-EU-5906-01A-11R-1672-07 | 0 | 2 | 1 | 1 | 0 | 0.390061435 | 0.003351878 | 0.88199081  | 0.975147355 | 0.454588804 | 0.126510846 | 2.307575658 | 4.456642534 | 3.014323549 |
| TCGA-EU-5907-01A-11R-1672-07 | 1 | 3 | 1 | 1 | 2 | 0.73041789  | 0           | 0.533466065 | 0.909831566 | 0.211091419 | 0.108134633 | 2.136845268 | 4.145196454 | 2.673842428 |
| TCGA-G6-A5PC-01A-11R-A33J-07 | 0 | 4 | 1 | 2 | 0 | 1.063409676 | 0.253753693 | 2.500969914 | 2.42208753  | 0.431000315 | 0.401042021 | 3.540532969 | 2.376218773 | 2.849086739 |
| TCGA-MW-A4EC-01A-11R-A266-07 | 1 | 2 | 1 | 3 | 0 | 1.252735135 | 3.115738581 | 4.203583951 | 2.079576474 | 0.802259196 | 0.729729965 | 3.156027609 | 4.137104392 | 4.341750671 |
| TCGA-T7-A92I-01A-11R-A37O-07 | 0 | 0 | 1 | 3 | 0 | 0.601757592 | 3.431673819 | 0           | 1.697230435 | 1.175438996 | 0.795522389 | 1.189507153 | 5.907387812 | 3.619255126 |



| MIR126      | MALAT1      | MIR4645     | HOXA13      | TRG.AS1     | HOXA10      | NEAT1       | HOXA3       | MIR570      | SNHG1       | MIR4668     | HOXA9       | MIR4701     | SNHG5       | MIR4768     |
|-------------|-------------|-------------|-------------|-------------|-------------|-------------|-------------|-------------|-------------|-------------|-------------|-------------|-------------|-------------|
| 3.968059001 | 3.747917597 | 1.726936923 | 0.057700495 | 0.601095375 | 2.598044821 | 4.385219424 | 1.781316517 | 2.558368131 | 3.493339112 | 0.509487556 | 2.397147302 | 0           | 5.547738685 | 4.250147372 |
| 1.41984578  | 4.401119755 | 2.23244844  | 0.013404145 | 0.562712392 | 1.875857936 | 5.096628277 | 1.195314169 | 3.925372324 | 3.821597708 | 0.746920277 | 1.449905101 | 0.461299521 | 5.915725461 | 3.75597297  |
| 2.870616418 | 4.697585329 | 1.112116554 | 0.092139141 | 0.831607512 | 2.672351106 | 4.70915583  | 1.304297378 | 3.868014716 | 2.951101252 | 0           | 2.586228437 | 1.472334667 | 5.081580443 | 1.143209465 |
| 0.913750017 | 4.763012775 | 2.350001864 | 0.149674128 | 0.614679468 | 2.666023931 | 3.930992519 | 2.08355336  | 3.227355734 | 2.520275991 | 1.051964341 | 3.000892874 | 1.132650651 | 4.665911172 | 2.945081595 |
| 3.083799185 | 6.491135786 | 0.442472668 | 0.169904218 | 0.605941323 | 2.236603884 | 5.114242111 | 1.973354101 | 3.983321776 | 2.995602952 | 1.127285762 | 2.501452831 | 0.908726808 | 4.806064638 | 0.457838749 |
| 3.614074236 | 5.787539827 | 2.436552739 | 0.035703844 | 0.533488123 | 2.932615546 | 5.905134481 | 2.737160207 | 2.484991103 | 4.168001138 | 0.933782216 | 3.647081638 | 0.743540489 | 5.695407577 | 0.896134874 |
| 2.840147078 | 5.908209079 | 3.000190686 | 0.233453563 | 0.958681117 | 1.828277025 | 4.349100753 | 2.379318949 | 2.878033703 | 3.564380248 | 1.214248801 | 2.233227498 | 1.563573534 | 5.192928041 | 1.717883665 |
| 3.105025885 | 5.87361583  | 2.29198141  | 0.009788688 | 0.849653327 | 2.784029492 | 5.264307684 | 2.664962082 | 4.180660614 | 3.554105153 | 0.220187569 | 3.44317842  | 2.103564963 | 4.360040717 | 0.9529552   |
| 2.316511444 | 6.020108717 | 1.404950831 | 0.058781465 | 1.143130555 | 1.848689531 | 5.989973403 | 2.26651707  | 3.405178475 | 3.708529864 | 0.681942846 | 1.949679808 | 0           | 5.826810209 | 0.652265262 |
| 0.836273631 | 6.018668711 | 0.604281598 | 0           | 0.094767535 | 0.03084678  | 8.077310853 | 0.013358797 | 4.516446831 | 3.016514968 | 0.466231185 | 0.037661994 | 0.710019606 | 3.429338593 | 0           |
| 3.479387271 | 4.602312339 | 1.116038271 | 0.064823024 | 0.791918566 | 2.432724311 | 4.776336716 | 1.923491707 | 5.071370605 | 3.764429091 | 0           | 2.903410891 | 0.892331633 | 5.438580346 | 2.665688361 |
| 2.633253736 | 5.808869049 | 1.543485433 | 0.198945765 | 0.955304469 | 2.705104041 | 5.650090683 | 2.048488342 | 4.365257102 | 2.570139216 | 1.981512021 | 2.830717064 | 1.635279267 | 4.463179618 | 2.317659004 |
| 0.629129572 | 5.347168604 | 0.681156393 | 0.627691867 | 0.41549747  | 2.183631054 | 5.513769844 | 1.993406777 | 3.783825541 | 3.573699007 | 1.779811059 | 2.051239973 | 0.317118332 | 5.13690264  | 1.527902503 |
| 1.73553827  | 5.025577248 | 1.050826398 | 0.027819922 | 0.720181484 | 2.323949393 | 5.356507981 | 2.364858488 | 2.9645743   | 3.762992846 | 0.557341598 | 3.222908303 | 0.836671679 | 5.28825331  | 3.174595301 |
| 0.66496703  | 3.572383149 | 0           | 0.721696467 | 0.647445644 | 2.906542267 | 3.304376969 | 2.117815046 | 3.402964279 | 3.291920715 | 0           | 3.592600673 | 0           | 5.310717513 | 0.291827718 |
| 1.613299092 | 5.076717826 | 2.870902513 | 0.919214324 | 1.26512407  | 2.507321645 | 5.63138298  | 2.840243312 | 3.985393759 | 3.411075305 | 0.637600901 | 2.946829554 | 0.945782377 | 4.641664944 | 2.380064296 |
| 2.797189021 | 5.091543926 | 2.471929031 | 0.17150128  | 0.615694592 | 2.599119126 | 5.131860838 | 2.235516859 | 4.003808242 | 3.787560827 | 1.256781898 | 3.200929178 | 1.660669848 | 5.578683274 | 2.869798591 |
| 2.419954674 | 5.935096591 | 1.976570439 | 0.112107499 | 1.379688286 | 2.440708494 | 5.713900611 | 2.33126972  | 4.165717952 | 3.9473798   | 1.465367732 | 3.045959275 | 1.715109897 | 5.294410684 | 3.221978343 |
| 1.572987384 | 5.838408607 | 1.85459443  | 0.098180621 | 0.74400662  | 0.480821006 | 5.773018017 | 2.045100475 | 4.459493242 | 3.609368292 | 1.286334348 | 0.445865612 | 0.438641244 | 5.303554544 | 3.098067208 |
| 3.580495836 | 6.888385951 | 2.460227632 | 0.140466171 | 1.179237559 | 0.637251549 | 6.24428017  | 1.814081157 | 5.154967577 | 3.054877016 | 0.947666956 | 0.557968127 | 1.90760408  | 5.175969874 | 3.795494255 |
| 3.726704648 | 5.735453557 | 2.034263171 | 0.117995367 | 0.723089364 | 2.325010152 | 5.38849661  | 2.185360204 | 4.168390335 | 3.61561611  | 0.94773379  | 2.665596408 | 1.768969697 | 5.584478516 | 3.634851908 |
| 0.23301847  | 3.997712295 | 0.471974998 | 0.012624013 | 0.37788826  | 1.353601218 | 4.492766533 | 3.5669726   | 3.573618705 | 3.402743287 | 1.434471041 | 2.176971008 | 0.960524272 | 4.521408268 | 4.257111581 |
| 1.987156434 | 4.99612224  | 1.004997069 | 0.100859443 | 0.596053923 | 2.53348489  | 4.696429671 | 1.633298228 | 3.458321372 | 3.19438712  | 1.075623921 | 2.418229905 | 0           | 4.857638392 | 3.453350613 |
| 0.937012467 | 6.00521743  | 1.817192048 | 0.239847645 | 0.565575374 | 1.894981357 | 4.922503906 | 1.904620189 | 3.352802016 | 3.981065724 | 1.310756184 | 2.428769483 | 1.61190372  | 6.227122762 | 3.121632409 |
| 2.201883789 | 5.836435951 | 2.267808283 | 0.051173121 | 1.166729147 | 2.032533373 | 5.731967322 | 1.551154481 | 4.317016402 | 3.25594591  | 1.262533475 | 2.39508779  | 1.649668785 | 5.138215093 | 1.408396784 |
| 1.772308782 | 5.436140856 | 1.157645276 | 0.246539273 | 0.726013296 | 2.878473764 | 5.187336992 | 2.501508969 | 4.190822687 | 3.180577432 | 1.89065918  | 2.782991584 | 1.587825847 | 4.807505474 | 2.80265209  |
| 1.471135113 | 4.876757588 | 0.407179562 | 0.049014789 | 0.241705691 | 2.251756462 | 4.745908112 | 1.033295359 | 2.533271362 | 1.224662058 | 0           | 1.997299976 | 0.845679395 | 4.510226832 | 3.686598502 |
| 0           | 3.510325795 | 0.269095896 | 0.035392061 | 0.604004413 | 1.728038985 | 4.288729592 | 0.242861749 | 2.246040748 | 3.456746359 | 0.293438355 | 1.659023056 | 0.32264305  | 2.654214293 | 0           |
| 1.084989947 | 5.625907959 | 3.763939265 | 0.285275024 | 0.931885879 | 2.092703938 | 5.064570934 | 1.963384037 | 2.97791176  | 2.61198596  | 2.96500135  | 2.241511438 | 0.589107328 | 4.073372245 | 0.515359044 |
| 3.261716658 | 6.054403844 | 0.480430209 | 0.123981815 | 0.509568694 | 2.679200811 | 6.115562879 | 1.850978572 | 2.766201488 | 4.456092642 | 0.520724562 | 2.908692104 | 0.78614411  | 6.202481474 | 4.175041842 |
| 1.728114494 | 4.372828022 | 0.301135488 | 1.822602526 | 1.009093115 | 2.243836532 | 5.663941936 | 1.678005249 | 4.811754843 | 3.556261125 | 0.595169746 | 2.677846869 | 0.648363499 | 5.436157932 | 1.427963633 |
| 3.515514061 | 3.854519853 | 0.91546441  | 0.025579491 | 0.453111621 | 2.592470597 | 4.693439342 | 2.017150133 | 1.741947858 | 3.387507318 | 0.405917503 | 3.287349265 | 0           | 6.303266965 | 3.168570224 |
| 0.409433844 | 5.31797979  | 0.626101982 | 0.015738655 | 0.229251688 | 1.749641096 | 5.467803518 | 2.799696173 | 3.887837937 | 3.403801466 | 0.84556707  | 2.198965514 | 0.914964945 | 5.288254567 | 1.936248894 |
| 1.928379821 | 4.432907099 | 3.612311903 | 0.167502434 | 0.922366948 | 1.58630474  | 3.925422725 | 2.187674006 | 2.565161869 | 3.475790942 | 0.889010036 | 1.322602856 | 0.559032149 | 5.476525716 | 2.078413108 |
| 3.300932195 | 4.349882669 | 3.803564235 | 0.153944602 | 0.388513171 | 2.044484416 | 4.39337235  | 2.704390331 | 1.749206857 | 3.433279198 | 0           | 2.429385627 | 0.603572966 | 5.905759531 | 1.869292873 |
| 3.818200148 | 4.520744496 | 1.664523628 | 0.020913774 | 1.220739398 | 2.473184413 | 5.525111951 | 1.519532038 | 3.081477687 | 2.965619186 | 0.339403291 | 2.376455175 | 0           | 4.756067334 | 1.002583709 |
| 4.397349195 | 4.776544913 | 1.520459576 | 0.275219767 | 0.74583083  | 2.551732403 | 5.70639904  | 2.035046552 | 4.149125458 | 3.708597692 | 0.666615503 | 2.554069799 | 0.98470449  | 5.865443763 | 1.807430667 |
| 3.086594428 | 4.364791381 | 2.837152844 | 0.151785226 | 0.881101609 | 2.747472268 | 4.847700263 | 2.336156361 | 2.883627601 | 3.253072683 | 0.333454219 | 2.664978346 | 0.900532917 | 4.970469023 | 0.988328055 |
| 3.86082518  | 5.340758921 | 2.179478603 | 0.035152582 | 0.388254087 | 2.534581271 | 5.034586286 | 2.710393394 | 3.557930367 | 2.911492992 | 0.675696152 | 2.833795724 | 2.110599653 | 4.750288688 | 0.646233865 |
| 5.244659635 | 5.051183221 | 3.368508647 | 0.299149227 | 0.548186436 | 2.945814032 | 5.667778183 | 2.911306994 | 1.898436256 | 2.722702137 | 0.622977423 | 3.06733444  | 1.765629505 | 5.039018517 | 1.929685304 |
| 3.905929985 | 5.055449372 | 1.764010142 | 0.225657198 | 0.302550298 | 2.960932301 | 6.025853104 | 3.08732919  | 2.875979185 | 3.906498498 | 0           | 3.795036726 | 0           | 5.682815261 | 1.412713096 |
| 4.422820041 | 4.854911975 | 2.078866888 | 0.124502743 | 0.566552217 | 0.619050422 | 5.668669623 | 1.670116343 | 3.464996097 | 3.394326434 | 0.628285891 | 0.469529296 | 1.145825795 | 5.448630691 | 0           |
| 2.796341499 | 3.921306145 | 1.157603026 | 2.361777052 | 1.020662142 | 2.552435517 | 4.570205475 | 1.855683625 | 1.480942351 | 2.436064881 | 0.745861691 | 2.51326432  | 1.002109699 | 5.739307421 | 0.714032097 |
| 0.30732446  | 2.227532816 | 1.208132624 | 0.072559414 | 0.730865078 | 2.545839246 | 2.868830357 | 1.965546974 | 2.042856199 | 2.780808995 | 0.365451193 | 2.381430997 | 0           | 5.897863661 | 1.669757997 |
| 1.22312295  | 4.782336738 | 1.073734255 | 0.152528348 | 1.931775831 | 1.97731265  | 4.831261479 | 2.149840309 | 1.461597045 | 3.327336155 | 0.856182049 | 2.348042834 | 1.887838913 | 3.636773849 | 2.670185804 |
| 0.266700929 | 1.778515212 | 0.534360643 | 0.05758545  | 0.053266548 | 2.886990351 | 2.379100364 | 0.984053235 | 2.008942453 | 2.865172196 | 0           | 3.077537601 | 0           | 5.948036564 | 0           |
| 1.088715855 | 2.795809746 | 0           | 0.062042156 | 0.065411709 | 2.280509178 | 2.790922978 | 1.073667417 | 1.403670142 | 3.132464977 | 1.713925617 | 2.089846863 | 0           | 6.138607842 | 0           |
| 0.650280548 | 2.79911204  | 1.529030455 | 0.204488302 | 0.65470995  | 2.427844636 | 2.31339615  | 1.032414876 | 0.584022571 | 3.165250085 | 0           | 2.049696219 | 0.469019622 | 5.553967961 | 2.094446908 |
| 0.35539371  | 6.272277409 | 0.693063498 | 0.020065021 | 0.208171994 | 3.011629478 | 6.330607107 | 2.200112768 | 2.674711824 | 3.288045588 | 0.747072986 | 3.636528908 | 1.32626144  | 4.119702093 | 0           |
| 0.639646108 | 5.77955549  | 0.864905696 | 0           | 0.059500585 | 0.200702026 | 6.273674465 | 0.052016168 | 3.219042089 | 3.392236117 | 0.746318794 | 0.0947058   | 1.172898766 | 3.014029953 | 0.279326675 |
| 0.552878181 | 5.681934753 | 1.139406084 | 0.294362048 | 0.00921489  | 2.860130026 | 7.838994745 | 0.837268375 | 4.048840711 | 2.583018377 | 0           | 3.132809387 | 0.879802087 | 3.584555936 | 0.441079577 |
| 1.684468554 | 4.485846214 | 1.995462559 | 1.116179128 | 0.926982582 | 2.234591573 | 4.64131882  | 1.797765623 | 4.046348307 | 3.06        |             |             |             |             |             |

|             |             |             |             |             |             |             |             |             |             |             |             |             |             |             |
|-------------|-------------|-------------|-------------|-------------|-------------|-------------|-------------|-------------|-------------|-------------|-------------|-------------|-------------|-------------|
| 0.560913343 | 4.956451949 | 1.957974061 | 0.10493718  | 1.770118724 | 3.147569458 | 5.113360767 | 1.962941626 | 3.538361731 | 3.299422374 | 2.489608751 | 3.390664417 | 0           | 5.356601455 | 3.817642343 |
| 0.319461844 | 4.602271725 | 0           | 0.640835007 | 0.292144286 | 2.88522097  | 4.674512235 | 3.009966978 | 2.58391118  | 1.734594173 | 1.768853898 | 3.694074673 | 0           | 4.426970278 | 1.832844652 |
| 1.506871463 | 3.885823051 | 0.660785305 | 0.031378409 | 0.703283331 | 0.835406043 | 4.426577097 | 1.619409748 | 3.478394575 | 4.154652591 | 1.544540642 | 0.816032506 | 0.774031236 | 6.91001627  | 4.139437073 |
| 0.781903807 | 6.102903772 | 0.674104234 | 0.021520549 | 0.112944424 | 0.787267343 | 6.41285325  | 0.522734862 | 3.983168191 | 2.598135861 | 0.522836718 | 0.958864814 | 0.789071985 | 2.690423718 | 0.868952142 |
| 3.857985656 | 4.961222915 | 1.434646853 | 0.050264288 | 0.46990178  | 0.303779588 | 5.247960974 | 1.962409116 | 3.541879576 | 3.589490363 | 1.118308177 | 0.497036089 | 0.832375576 | 5.627933951 | 1.871177482 |
| 0.497705387 | 4.580634529 | 1.984038804 | 0.922235975 | 1.277642589 | 3.147184498 | 4.459681314 | 2.731992189 | 2.940828561 | 3.164542773 | 1.170316837 | 3.067200688 | 0.637681827 | 5.633262142 | 3.177036273 |
| 2.901882912 | 6.029761733 | 1.405569767 | 0.070303005 | 0.93136017  | 2.820376487 | 5.465587113 | 1.760778106 | 4.304867336 | 2.738646705 | 0.682317474 | 2.412847232 | 1.422106523 | 4.812702406 | 3.383837489 |
| 2.490256934 | 6.746141439 | 0           | 0.046954911 | 1.845498134 | 2.384364926 | 6.071818282 | 2.264016481 | 3.090272749 | 4.249681607 | 2.072060447 | 2.924427196 | 0           | 4.239201998 | 5.441046647 |
| 0.997648325 | 5.047730349 | 0.938787751 | 0.20848684  | 1.144261928 | 0.064482539 | 5.565524892 | 0.437398984 | 2.537019685 | 4.349082093 | 1.686585127 | 0.153004497 | 0           | 5.479944487 | 1.540115718 |
| 0.781176489 | 5.881816571 | 1.295235987 | 0.53437749  | 0.910653547 | 2.921536542 | 6.400293367 | 1.016919474 | 4.065316404 | 3.837796362 | 2.019260626 | 2.795947189 | 0.71922584  | 4.749521394 | 1.548828443 |
| 1.408630779 | 6.969767842 | 0.334532863 | 0.10442841  | 0.061831101 | 1.985396323 | 5.453237651 | 1.500459836 | 2.721010993 | 2.004340486 | 0.896231433 | 2.957312457 | 1.375629376 | 3.706408236 | 4.018521746 |
| 1.203042764 | 4.559148684 | 1.544350615 | 0.517678811 | 1.209941908 | 2.239564993 | 3.290640285 | 1.737679105 | 2.524757931 | 2.45275272  | 0.337482793 | 2.118942064 | 0           | 5.03531436  | 3.550909982 |
| 1.485239256 | 6.094243747 | 2.799052784 | 0.163892823 | 0.935137893 | 0.634052615 | 5.11830684  | 1.710867627 | 4.65800488  | 4.377327806 | 1.671416695 | 0.55919968  | 1.777400903 | 5.352040833 | 3.799054556 |
| 1.872623259 | 5.796632125 | 1.977663683 | 0.212740215 | 0.949624682 | 2.756890655 | 5.3450849   | 2.87345531  | 4.272624494 | 4.425648236 | 0.547718061 | 3.179032424 | 0.597488007 | 5.744752638 | 3.147730021 |
| 0.391670479 | 3.820438407 | 0.426874414 | 1.481926913 | 0.640153911 | 2.81628112  | 3.475489304 | 2.443413287 | 3.474177616 | 2.591151735 | 2.010779164 | 3.311494536 | 1.634205411 | 3.163713882 | 5.070526255 |
| 3.431022847 | 5.856462964 | 1.680112068 | 0.163695072 | 0.829294317 | 2.831417193 | 6.048557575 | 1.995717717 | 5.658914589 | 3.866444976 | 1.145671349 | 2.946380427 | 1.776096099 | 4.564470284 | 0.297942796 |
| 0.651379969 | 4.346115568 | 0.274991242 | 0.045150979 | 0.476641644 | 2.724475828 | 2.182566851 | 2.020256974 | 3.481314571 | 2.305455056 | 0.299813672 | 2.285529612 | 0.329583423 | 3.607878062 | 3.148281723 |
| 0.667816427 | 4.145897633 | 0.217176981 | 0.010605972 | 0.034540891 | 2.401140133 | 3.269113773 | 1.959966539 | 1.839640992 | 1.674205436 | 0.237199478 | 3.134310387 | 0           | 2.919908995 | 1.51574809  |
| 3.644010825 | 6.754312935 | 1.3900085   | 0.096970438 | 1.596758312 | 0.794979114 | 6.833995515 | 2.948465916 | 5.202057907 | 3.964300686 | 2.666449259 | 1.02639258  | 2.104884851 | 5.28282484  | 2.900133896 |
| 2.984527977 | 7.005455107 | 0.429704569 | 0.095298489 | 0.860014548 | 2.370933864 | 6.97427707  | 1.610523144 | 2.927911834 | 3.977461702 | 1.718052925 | 3.07793856  | 0           | 5.75466427  | 3.425947532 |
| 1.892597912 | 5.530467797 | 0.484726733 | 0.156869768 | 1.165628333 | 3.187770623 | 4.51124268  | 2.308115529 | 3.349451843 | 3.764093351 | 2.174413752 | 3.059039264 | 0.315020547 | 4.221248021 | 3.312295392 |
| 2.92942975  | 6.589279269 | 0.503315945 | 0.450566854 | 0.391032887 | 3.065352063 | 5.429559017 | 3.577755787 | 3.747086387 | 3.934741124 | 1.616576732 | 3.783115156 | 1.186244453 | 5.536194431 | 4.111841409 |
| 1.503581139 | 6.138230963 | 1.426780692 | 0.007357024 | 0.331285873 | 2.977113496 | 5.984929858 | 1.682634161 | 5.097613252 | 4.219753423 | 0           | 3.106751738 | 0           | 5.091045376 | 1.463053432 |
| 1.966628178 | 5.909824034 | 2.739957507 | 0.119024888 | 0.52350681  | 2.617121735 | 6.046090204 | 2.484796055 | 4.789911711 | 3.724927963 | 2.685610105 | 3.127847447 | 0.380577269 | 6.045776903 | 0.329974539 |
| 1.868298548 | 5.773047445 | 2.485092822 | 2.58424068  | 1.447030301 | 2.412657712 | 5.612191031 | 2.570833003 | 3.963665488 | 4.178117092 | 0.756857242 | 2.264437936 | 1.605905937 | 5.91051955  | 2.091731588 |
| 2.627289484 | 4.188374349 | 2.101455969 | 0.059303763 | 0.827935434 | 1.782262595 | 4.825090813 | 1.739331092 | 3.209590647 | 3.069348112 | 1.099858208 | 1.69077087  | 1.041694849 | 5.664012913 | 1.486743803 |
| 1.905218514 | 5.947019279 | 2.011108887 | 0.118566446 | 1.085858892 | 3.315660595 | 5.851424505 | 2.238190596 | 3.917921139 | 3.012009516 | 2.445024318 | 2.860267255 | 0.991212648 | 4.18598237  | 1.177291317 |
| 2.313566403 | 6.577122548 | 0.791284351 | 0.25305455  | 2.17887426  | 1.714335128 | 5.794384213 | 1.904434706 | 3.56390851  | 3.408150228 | 1.980687655 | 2.196786297 | 0.375909917 | 4.699005522 | 4.188398516 |
| 0           | 2.469291982 | 0.883172312 | 0.085051117 | 0.592377461 | 2.395672676 | 1.822143283 | 1.191249805 | 0.878056267 | 2.764456976 | 0.55034375  | 2.143549414 | 0           | 6.15801818  | 1.212874365 |
| 2.556949847 | 6.629981002 | 2.102719192 | 0.125260906 | 1.332928239 | 2.20638962  | 6.262224638 | 2.61630836  | 3.606020647 | 3.481530707 | 1.212925822 | 2.923548541 | 1.301309755 | 4.670244179 | 3.939084907 |
| 0.216125281 | 1.626113684 | 1.169156294 | 3.071400342 | 0.414255229 | 2.94064928  | 1.184661548 | 1.669964389 | 0.359783508 | 1.088445694 | 0           | 2.11546547  | 0           | 3.193252709 | 0           |
| 1.418453166 | 6.276778102 | 0.692071401 | 0.182869503 | 0.736115031 | 2.522047646 | 5.65731876  | 2.979226047 | 3.429410733 | 3.822751097 | 1.89089282  | 2.631225912 | 1.324697543 | 5.451583053 | 5.716029113 |
| 2.511629875 | 6.503759682 | 1.449116829 | 0.066476169 | 1.146033251 | 2.226688574 | 5.920037917 | 1.779106811 | 3.679554427 | 3.687496263 | 2.016324805 | 2.325317315 | 0.508924259 | 4.833710889 | 5.643141541 |
| 0.848808838 | 7.064971991 | 1.074021944 | 0.120372256 | 0.141479762 | 1.885708618 | 6.358461557 | 1.019897474 | 4.705624082 | 2.519983797 | 1.43410951  | 2.478788335 | 1.531709035 | 4.636991124 | 0.75707629  |
| 1.519259529 | 5.559049315 | 0.754275993 | 0.403079069 | 0.168355116 | 2.456516165 | 4.153977315 | 1.425784227 | 2.154714457 | 2.19118217  | 0           | 2.390245812 | 0.641178366 | 3.979640264 | 1.948043857 |
| 1.202432391 | 6.099403507 | 1.135573523 | 0.279591691 | 1.454601075 | 3.197008003 | 4.070659245 | 2.987540964 | 3.610329504 | 2.762691777 | 0.840007018 | 2.903359313 | 1.11799921  | 3.638544512 | 2.696124811 |
| 2.593434255 | 5.63513731  | 0           | 0.107928799 | 0.442257793 | 2.508271438 | 3.786839086 | 1.142776913 | 1.755277398 | 1.414380171 | 1.74487935  | 2.526266394 | 0           | 4.91702705  | 5.576388251 |
| 0           | 2.930205899 | 0           | 0.579627662 | 0.594717242 | 2.431447169 | 2.649663346 | 2.070053201 | 0.553005297 | 1.770957512 | 0           | 1.93916393  | 0           | 4.792369773 | 2.560383339 |
| 4.019592305 | 6.024803924 | 1.137500639 | 1.265098191 | 0.555648112 | 2.464089921 | 4.711449186 | 1.670562671 | 3.428126539 | 2.924659952 | 0.731181138 | 2.177384652 | 1.302559625 | 3.871194544 | 3.138163315 |
| 0.596955899 | 5.076566339 | 0.886476919 | 0.614534253 | 0.480844231 | 2.512642071 | 4.592826734 | 1.725394345 | 3.147233036 | 2.767845383 | 0.698083186 | 2.152050196 | 0.758301142 | 4.148147635 | 4.780931263 |
| 3.167369889 | 6.253898907 | 2.566873775 | 0.114254057 | 0.535522153 | 2.793619765 | 6.152977848 | 2.826924271 | 6.053903879 | 4.224273166 | 0.891758668 | 3.201254415 | 2.263617447 | 5.679896853 | 3.773723745 |
| 1.726407403 | 5.208036025 | 1.044081288 | 0.023012652 | 0.949083871 | 1.804396514 | 5.03614288  | 1.987865289 | 3.288056955 | 2.793036335 | 2.313848798 | 2.378774225 | 1.200419327 | 4.464645909 | 0.733844911 |
| 2.470461475 | 6.006697824 | 0           | 0.012827243 | 1.267688763 | 0.265647567 | 5.481924281 | 2.543802936 | 4.267722701 | 3.412014114 | 1.709778152 | 0.283848617 | 0.444129414 | 4.101616696 | 4.74309014  |
| 2.437661836 | 6.724562757 | 0.722653057 | 0.204868967 | 0.582101138 | 0.989816721 | 6.257511135 | 1.631662654 | 5.194335093 | 3.974776035 | 2.403652722 | 1.361913805 | 2.314270041 | 5.44220227  | 4.242542264 |
| 1.057926063 | 6.518142841 | 2.01871116  | 0.174511861 | 0.802997812 | 3.065372459 | 6.123523476 | 1.817586153 | 4.827271742 | 3.80889861  | 2.346904611 | 3.095331731 | 0.572002146 | 4.673445749 | 2.98262847  |
| 2.489500522 | 6.607518178 | 1.227060412 | 0.139473536 | 0.545963696 | 2.101702715 | 5.449081916 | 1.800791363 | 3.514922125 | 2.414751748 | 2.273504125 | 1.742080532 | 0.987919814 | 4.385150065 | 4.543749187 |
| 0.368639809 | 6.506633414 | 0.5676176   | 0.256556895 | 0.761334877 | 2.400282006 | 4.938797408 | 2.229451805 | 3.885221572 | 2.572398969 | 2.484337509 | 2.534983203 | 0.986959027 | 5.455385103 | 2.81135018  |
| 1.873540231 | 6.436956866 | 2.365179124 | 0.033614419 | 0.735057563 | 1.714551467 | 5.352364489 | 3.288002037 | 3.250172477 | 3.259423597 | 2.525490215 | 2.158861037 | 0.708724671 | 5.357480738 | 1.887646439 |
| 0.301896428 | 3.259779224 | 0           | 0.169261108 | 0.3537199   | 2.788321928 | 2.413514984 | 0.83648934  | 1.014242076 | 2.821346894 | 0           | 2.979028949 | 0           | 4.558314326 | 0.617982705 |
| 3.184066838 | 7.400817369 | 0.532518195 | 0.066693639 | 0.596368553 | 1.716294032 | 6.493056202 | 2.631624286 | 3.666210618 | 3.10452957  | 1.980603552 | 2.161197934 | 0.348041584 | 5.48547469  | 5.096574188 |
| 1.06750379  | 5.173761909 | 0.264967473 | 1.237725261 | 0.764803761 | 3.208771145 | 4.251267778 | 3.006711725 | 3.914902087 | 3.301784735 | 0.916155137 | 3.490560458 | 0.98960684  | 5.331665274 | 1.303620652 |
| 0           | 3.836805664 | 3.378805357 | 0.253816434 | 0.692335108 | 2.926592186 | 2.966451451 | 2.735923831 | 1.270242143 | 2.28872026  | 0.355605423 | 3.594365045 | 0           | 3.277658871 | 2.977232387 |
| 1.518879288 | 4.424263118 |             |             |             |             |             |             |             |             |             |             |             |             |             |

|             |               |             |             |             |             |             |             |             |             |             |             |             |             |             |
|-------------|---------------|-------------|-------------|-------------|-------------|-------------|-------------|-------------|-------------|-------------|-------------|-------------|-------------|-------------|
| 0.531400375 | 2.923532238   | 1.30731133  | 1.251329048 | 1.063975469 | 2.567286762 | 4.15509132  | 2.059729896 | 1.11817145  | 3.748607045 | 0           | 2.78629245  | 0           | 4.131637774 | 1.016538206 |
| 2.266920007 | 5.626322995   | 1.634383095 | 0.079488805 | 0.417592941 | 2.475316878 | 5.076630778 | 1.520615453 | 3.196524771 | 3.018711795 | 1.020690637 | 2.594750988 | 0           | 5.029505825 | 1.14834382  |
| 1.883368101 | 5.96626719    | 1.837108233 | 0.186290379 | 0.877845058 | 1.961319874 | 5.516240889 | 2.273951915 | 3.24548661  | 3.289273835 | 0.521472091 | 2.066886737 | 1.964507483 | 5.984268676 | 2.296571488 |
| 1.095401601 | 6.152820559   | 2.430792159 | 0.07996545  | 0.723482539 | 2.645326242 | 6.300793629 | 2.165269041 | 3.242884063 | 3.73156404  | 2.295980724 | 2.786866164 | 1.187808543 | 6.013373143 | 2.912360764 |
| 0.251005738 | 3.527718977   | 3.131240048 | 1.44434255  | 0.459926239 | 3.318514002 | 2.072521782 | 2.869068874 | 1.321201318 | 3.294540291 | 0           | 3.966053075 | 0.329293961 | 5.827272337 | 1.20771205  |
| 0.739892413 | 6.631391653   | 0           | 0.042451076 | 0.089979704 | 2.968411292 | 6.297287741 | 1.05058268  | 3.204800689 | 3.72153763  | 0.346203784 | 2.971644852 | 0           | 2.008524317 | 0.329469424 |
| 0.817886992 | 4.777796343   | 0.881332964 | 0.036323834 | 1.2279425   | 2.866405618 | 4.366948295 | 2.425081668 | 3.77616684  | 3.984491923 | 0           | 3.589162175 | 1.02091433  | 5.98569081  | 1.067135062 |
| 0.477282787 | 4.641832538   | 0           | 0.904264616 | 0.774149918 | 3.255586663 | 3.455440969 | 1.302643446 | 1.767768132 | 1.930929038 | 0.308095677 | 2.779251195 | 0           | 4.244840181 | 2.518352828 |
| 0.211764846 | 3.897176442   | 1.362202643 | 0.141498841 | 0.233536757 | 2.069523481 | 3.300127641 | 1.122076896 | 1.485984178 | 1.395914291 | 0.468809454 | 2.798781026 | 0           | 3.725386591 | 1.824761186 |
| 0.669018334 | 3.973844079   | 2.708397339 | 0.059225187 | 0.665286912 | 1.751653593 | 4.079399757 | 1.121865502 | 3.799611036 | 3.153410727 | 0           | 2.354524128 | 0.483374273 | 4.081862029 | 0           |
| 0.230099355 | 3.743210564   | 1.101169961 | 0.037043042 | 0.060331851 | 2.093244745 | 2.671710191 | 1.891493425 | 1.710552461 | 1.951717485 | 0           | 3.177157769 | 0           | 4.308269647 | 0.261373642 |
| 2.492060512 | 3.926190053   | 2.993364499 | 0.176347972 | 0.536109289 | 2.194522491 | 3.584635345 | 1.681725488 | 3.523858416 | 3.115322338 | 0           | 2.375544053 | 0.888358449 | 5.172089017 | 0           |
| 0.779913117 | 4.520209105   | 0.560631125 | 0.100170481 | 0.302364839 | 2.18000732  | 3.353191162 | 1.370305741 | 2.215452971 | 2.008863114 | 0           | 2.821419568 | 0.471933674 | 4.034894511 | 1.106386972 |
| 0.28410543  | 4.167239426   | 0.310652484 | 0.076646013 | 1.209464357 | 2.199541423 | 2.527152448 | 1.620681854 | 1.223484492 | 2.11427621  | 0.338333537 | 1.929643537 | 0           | 4.815322877 | 1.700476158 |
| 0.253787374 | 4.272874328   | 0.886950557 | 0.182697116 | 0.226770525 | 2.539990416 | 3.458847141 | 1.724457436 | 1.674013784 | 1.65343856  | 1.116189646 | 3.415015215 | 0.33284778  | 4.199458783 | 1.468523644 |
| 0           | 4.44409687    | 1.159844479 | 0.340612633 | 0.229707845 | 3.185153845 | 3.745698695 | 2.752495783 | 2.619205518 | 2.819755201 | 0           | 2.66317238  | 0           | 5.788756883 | 0.401732562 |
| 0.406685737 | 3.902095228   | 0.781518141 | 0.163149465 | 0.541746819 | 2.709358673 | 3.705504818 | 1.720195459 | 1.891747277 | 2.520665799 | 0.480695606 | 2.352631924 | 0           | 5.828300078 | 1.697887112 |
| 0.616553747 | 2.41587114    | 0.667761907 | 0.095343474 | 0.328905955 | 2.905377612 | 2.151840819 | 1.787614834 | 2.196042698 | 1.973867545 | 0           | 2.569920289 | 0           | 5.18760349  | 0.689271456 |
| 0           | 3.739205364   | 0           | 0.061652881 | 0.109137084 | 2.124047152 | 3.072952752 | 1.929245868 | 2.336351729 | 1.880954793 | 0.315010403 | 3.326848045 | 0           | 4.036716643 | 0.943599778 |
| 0           | 4.304902616   | 2.551768137 | 0.072880948 | 0.74129284  | 2.913187287 | 3.210216657 | 2.471179777 | 2.147881497 | 1.740373877 | 0.481595706 | 3.060094941 | 0.287069809 | 4.338525487 | 0.459291287 |
| 0.232353961 | 4.35963379    | 1.109317834 | 0.049695216 | 0.510347493 | 2.004762525 | 2.754012704 | 1.229787607 | 1.966984123 | 2.725880738 | 0.510347493 | 1.613351181 | 0           | 4.673489179 | 1.140359325 |
| 0.296866621 | 3.574792395   | 0.324477561 | 0.111279499 | 0.013504386 | 2.028716096 | 3.278453718 | 1.647659734 | 1.486394062 | 1.368578427 | 0           | 3.133739682 | 0.38764682  | 3.118935688 | 1.36435614  |
| 0.37761339  | 2.972589255   | 0.993367771 | 0.111036453 | 0.510840425 | 3.517058246 | 2.829644469 | 2.549602534 | 2.0517656   | 1.94505248  | 0           | 3.56036589  | 0           | 5.587790525 | 0           |
| 0           | 1.675735191   | 1.77272522  | 0           | 0.536674517 | 1.495650725 | 1.958891052 | 2.994458162 | 0           | 1.03768288  | 0           | 1.460008316 | 0           | 7.119622683 | 4.96253464  |
| 0.791991031 | 4.053710686   | 1.884218176 | 0.222890471 | 0.657257576 | 3.040680272 | 3.363497377 | 1.908057571 | 2.455966368 | 2.935256099 | 0           | 2.921297834 | 0.729382324 | 5.489749373 | 1.696223272 |
| 0           | 3.70976058    | 0.833027411 | 0.09893461  | 0.107956279 | 2.49485908  | 4.241515711 | 1.794365102 | 1.711248803 | 2.301623336 | 0           | 3.181352883 | 0           | 5.296864752 | 1.53467451  |
| 0.591768461 | 4.375179277   | 1.610000441 | 0.020235049 | 0.106394716 | 2.448156666 | 4.1788876   | 2.130941176 | 2.187412691 | 1.530906262 | 1.018819075 | 3.146492809 | 0           | 2.91770957  | 0.662179707 |
| 0.745688624 | 4.411813399   | 0           | 0.053392306 | 0.128106588 | 2.337828964 | 4.736177327 | 2.282539607 | 2.471633556 | 2.504975854 | 0.349288848 | 2.594340305 | 0.383352561 | 3.895679517 | 1.736443871 |
| 0.41296409  | 4.201844565   | 0.631129752 | 0.054878922 | 0.188818299 | 2.058352703 | 4.165542308 | 1.669848879 | 2.49740594  | 1.838468629 | 0.26449843  | 3.18374054  | 0           | 3.523680887 | 1.537751746 |
| 0.223811837 | 3.041588215   | 1.415355026 | 0.391011501 | 0.881846541 | 2.545189893 | 2.553986756 | 2.654648898 | 2.179290229 | 2.163087268 | 0           | 2.340297971 | 0.294449791 | 4.054161452 | 0.658354701 |
| 0.85942747  | 4.861275804   | 0.925181136 | 0.126791803 | 0.654449687 | 1.350369746 | 3.379095343 | 1.328266846 | 2.400938609 | 2.844531443 | 0.800422575 | 1.614636075 | 0.35012471  | 4.404493228 | 1.521418104 |
| 0.465539927 | 3.859563185   | 0.506298488 | 0.118922508 | 0.756803832 | 0.760624082 | 2.748621972 | 1.527653419 | 2.808790676 | 3.101689525 | 0           | 0.55078649  | 0           | 5.51990736  | 0.285369367 |
| 0.928659734 | 3.8680669     | 1.84526197  | 0.164527807 | 0.290592043 | 2.515849289 | 3.531767815 | 1.497101621 | 1.455129707 | 1.835161985 | 0.729678273 | 2.530256607 | 0.791947629 | 4.651218229 | 1.715096545 |
| 1.598750491 | 4.558074351   | 0.267355368 | 0.073684581 | 0.660633035 | 2.747059113 | 3.831900943 | 1.664437027 | 2.734808609 | 1.948271801 | 0.741469772 | 2.087575537 | 1.166213428 | 4.976060624 | 2.062744267 |
| 2.542165718 | 9.244004162   | 0           | 0.053729128 | 0.166921089 | 0.217461998 | 5.820802635 | 0.116408967 | 4.577711323 | 3.551599133 | 1.024212352 | 0.271504019 | 0.820333258 | 3.03877789  | 0.407068073 |
| 3.25994158  | 9.089282879   | 0.706099491 | 0           | 0.939743542 | 2.413569249 | 4.855083499 | 0.987155197 | 3.861213136 | 3.52810076  | 1.256438539 | 2.665575238 | 0           | 5.524576042 | 2.099268734 |
| 1.526669596 | 3.639666313   | 0.299524569 | 0.059243829 | 0.941563514 | 2.674077985 | 4.114112198 | 1.630427278 | 2.778469409 | 3.408254514 | 0.32632178  | 3.02993979  | 0           | 5.311779183 | 0.565778551 |
| 0.365603052 | 6.841499125   | 3.309584037 | 0.788982352 | 0.513382066 | 2.139429487 | 6.319830793 | 2.879609467 | 2.920525868 | 3.195166171 | 0.765915541 | 3.931015588 | 1.11597516  | 4.78497081  | 5.064656421 |
| 4.062316504 | 5.9792036     | 2.495635396 | 0.031652627 | 1.357060409 | 0.681324801 | 5.619433626 | 1.642583659 | 4.416437695 | 3.949803959 | 0.852681384 | 0.87817268  | 1.480672026 | 5.482976719 | 2.720313375 |
| 3.546350441 | 5.750137677   | 1.223459303 | 0.066484584 | 0.871605533 | 2.614863228 | 5.421931029 | 2.310058892 | 4.603796566 | 3.274427084 | 1.153029981 | 3.13567858  | 1.895134149 | 4.974531932 | 2.234038144 |
| 2.363665171 | 3.394571351   | 0.36300246  | 0.192746303 | 0.616739895 | 1.011642816 | 3.329831811 | 2.006644348 | 2.347093264 | 2.609452459 | 0           | 0.818569692 | 0           | 4.637063287 | 0.375955024 |
| 2.563217982 | 7.090022421   | 0           | 0.091733886 | 0.420666024 | 1.088073206 | 3.853859714 | 0.34090549  | 2.67321498  | 3.470437893 | 0           | 0.520088916 | 0           | 4.135970172 | 0           |
| 1.603871648 | 4.498486975   | 2.337046104 | 0.090534325 | 0.572337734 | 2.297007842 | 4.350013343 | 2.083040186 | 1.808246755 | 2.896868345 | 0.319228537 | 2.465073306 | 0.868326436 | 5.165261314 | 1.523164463 |
| 2.901210234 | 11.72194634   | 2.192634604 | 0.127884901 | 1.393188095 | 2.162215474 | 9.42531847  | 2.007139709 | 6.343242806 | 3.330243462 | 2.72512878  | 2.493185653 | 0           | 4.119407034 | 5.19255588  |
| 1.18682002  | 2.7237501     | 0.304341225 | 0.160061756 | 0.243551033 | 1.303555258 | 2.732114889 | 2.474215127 | 2.350916431 | 3.150815396 | 0           | 1.250429041 | 0.364062002 | 4.345749413 | 0.574103007 |
| 1.407249028 | 4.324801905   | 0.266233879 | 0.143159146 | 0.240457565 | 2.198753359 | 3.853971025 | 1.813560866 | 1.62826546  | 2.23450556  | 0           | 3.383103186 | 0.319271887 | 3.152497476 | 1.535019187 |
| 0.441894638 | 2.7014448614  | 2.618963876 | 0.042571219 | 0.498818939 | 3.135920748 | 1.778149808 | 2.088915382 | 0.394020754 | 2.227171307 | 0           | 3.215218164 | 0           | 3.736741281 | 0.866569097 |
| 1.519500106 | 4.519701643   | 0.330684928 | 0.055197272 | 0.054394563 | 2.19864854  | 3.788111695 | 2.488309409 | 3.028094693 | 1.976846911 | 0.359938649 | 3.209664489 | 0.39490593  | 2.970267415 | 1.879917262 |
| 0.195442914 | 3.805660456   | 1.084771227 | 0.041376168 | 0.530956621 | 2.555002933 | 4.333567122 | 1.046369246 | 2.748625807 | 1.757137672 | 0           | 2.213995324 | 0.666493898 | 4.360585816 | 0.584888295 |
| 1.322190102 | 4.427983484   | 1.305857913 | 0.119521234 | 0.21995685  | 0.629150539 | 4.952634697 | 1.035498821 | 3.053913462 | 4.207875284 | 0           | 0.86663356  | 0.535925131 | 4.975072075 | 0           |
| 0           | 4.27330749    | 0           | 3.098926009 | 0.523601084 | 3.297205541 | 2.698513785 | 2.072917336 | 0.615664814 | 1.61765486  | 0           | 1.240990669 | 0           | 3.022111108 | 0.43172848  |
| 0.993572185 | 2.930743823   | 1.828979401 | 0.007943668 | 0.521211621 | 0.932839023 | 3.118708098 | 1.446217605 | 2.456079988 | 3.234916191 | 0.263733437 | 0.882563111 | 0           | 5.032311117 | 1.219199701 |
| 0           | 3.063191094   | 1.638555152 | 0.378833539 | 0.371861697 | 2.694694404 | 3.154580028 | 2.552561354 | 2.92257302  | 2.310216058 | 0.77850425  | 3.304151535 | 0           | 4.110850249 | 0.592170348 |
| 0           | 4.1660809     | 0           | 0.154082568 | 0.511959898 | 0.65129755  | 3.462469879 | 2.124464407 | 2.700959161 | 3.374806832 | 0.358841005 | 0.449390924 | 0           | 4.177383862 | 1.649406342 |
| 0.290741473 | 4.620163743</ |             |             |             |             |             |             |             |             |             |             |             |             |             |

|              |             |             |             |             |             |             |             |             |             |             |             |             |             |             |
|--------------|-------------|-------------|-------------|-------------|-------------|-------------|-------------|-------------|-------------|-------------|-------------|-------------|-------------|-------------|
| 1.591803708  | 2.46538702  | 1.145896795 | 0.056283892 | 0.680767324 | 2.327168643 | 2.80955428  | 1.762521517 | 2.578768811 | 3.915075137 | 0.530776612 | 3.156807404 | 0           | 6.83841743  | 3.09963735  |
| 0.681167214  | 3.500047007 | 0           | 0.043001293 | 0.276353392 | 1.834582018 | 3.867200539 | 0.99612346  | 2.525833603 | 1.562090637 | 0           | 3.113370646 | 0.492704534 | 3.553286593 | 3.049270638 |
| 0.877885627  | 5.947561897 | 1.510670082 | 0.039839606 | 0.175432517 | 2.362905584 | 6.878839574 | 1.08144942  | 4.189837558 | 2.510105537 | 0.593202177 | 3.300182069 | 0.646256349 | 3.438727399 | 0.566669093 |
| 1.364257257  | 6.18213743  | 1.203834852 | 0.148661524 | 0.400522976 | 2.43532466  | 5.291120434 | 1.910073388 | 3.547496533 | 4.155581515 | 1.655715484 | 2.65070609  | 0.339741864 | 5.163251819 | 3.00141363  |
| 0.393654726  | 4.005258476 | 1.254137281 | 0.311710688 | 0.431525669 | 1.971046245 | 3.552402741 | 1.054874625 | 1.54811484  | 1.544427098 | 0           | 2.321008181 | 0.509208577 | 5.047358195 | 3.728130345 |
| 1.973780958  | 5.354502767 | 0.320343883 | 0.599970763 | 0.811945026 | 2.688946551 | 4.680771114 | 2.50290933  | 4.799169504 | 3.103421054 | 1.243336858 | 3.000533247 | 0.934808224 | 4.960143438 | 3.928741838 |
| 0            | 3.206924098 | 0           | 0.223922261 | 0.318595596 | 2.323686824 | 2.365014997 | 0.74604373  | 1.323702295 | 1.379957392 | 0.375787649 | 2.971208518 | 0.412086295 | 4.847546193 | 3.582206731 |
| 0.396713928  | 3.161810408 | 2.720329502 | 0.24505339  | 0.580210386 | 1.619165754 | 2.731845225 | 1.676312216 | 1.915905124 | 2.234710654 | 0.656718574 | 1.622154043 | 0           | 2.941560731 | 0           |
| 0            | 2.748234103 | 1.056937486 | 0.100274454 | 0.900134281 | 2.181785886 | 3.255579496 | 1.08976123  | 2.147599422 | 2.575755853 | 0.307675988 | 1.899282933 | 0           | 5.931215585 | 1.36403492  |
| 0.735310859  | 3.322024611 | 1.539995739 | 0.286849661 | 0.901032639 | 1.992188912 | 2.144852588 | 1.160993068 | 1.190008063 | 1.813652998 | 0.21591559  | 1.750770212 | 0           | 3.91181056  | 0.68782842  |
| 0.210223576  | 3.630974044 | 1.027856263 | 0.044687666 | 1.284920088 | 1.760581239 | 3.924435029 | 1.580666504 | 2.39541828  | 1.359263742 | 0.465675512 | 1.832678799 | 0           | 4.294357022 | 0           |
| 0.403383765  | 3.471806656 | 1.379930129 | 0.11937633  | 0.487173199 | 1.899012758 | 2.923776799 | 1.203076067 | 1.881905359 | 3.121391821 | 0           | 1.88489796  | 0           | 5.298648579 | 0.24522875  |
| 0            | 2.602705393 | 2.696218587 | 0.097446478 | 0.255343574 | 2.815571724 | 3.658078485 | 2.990683212 | 2.148909601 | 1.790843679 | 0           | 3.307808098 | 0.435713468 | 4.066696374 | 0.67837681  |
| 0.242032328  | 3.404202681 | 0           | 0.013152091 | 0.010806459 | 2.383380796 | 4.070216232 | 2.137542509 | 1.465017223 | 1.959548505 | 0           | 3.01319975  | 0.578103345 | 2.933658852 | 0           |
| 0.295319119  | 2.86063336  | 2.090799819 | 0.452328733 | 1.308792791 | 1.904940309 | 2.824075203 | 1.740137878 | 2.132223994 | 2.686794304 | 0.351439228 | 2.052760881 | 0.385685972 | 3.034561412 | 0           |
| 0.627912974  | 3.989863855 | 1.38144629  | 0.060090481 | 0.260966313 | 3.108250292 | 2.919788585 | 1.444855027 | 1.760997208 | 1.715053697 | 0           | 3.045920985 | 0           | 2.65611119  | 1.299582852 |
| 1.360993757  | 3.521834269 | 1.449743102 | 0.188801891 | 0.918082682 | 2.715238996 | 3.406516444 | 1.844260638 | 2.976880822 | 2.611596966 | 0           | 2.699873776 | 0.770164511 | 4.398889627 | 1.379396116 |
| 1.279542592  | 5.494732224 | 1.632853936 | 0.088988822 | 1.705940178 | 2.09908847  | 6.116561135 | 2.531416047 | 2.682804997 | 3.727334098 | 0           | 2.272798039 | 0.715499207 | 3.55361428  | 4.767513908 |
| 0.330036365  | 4.388169489 | 3.450391283 | 2.457722265 | 0.482095017 | 3.531311314 | 5.193959142 | 1.897147938 | 0.293071049 | 1.632246862 | 0.391906423 | 3.551645406 | 0           | 3.481025532 | 0           |
| 2.248197487  | 5.598441618 | 1.35203637  | 0.295417416 | 0.430166026 | 2.548093374 | 6.394043717 | 2.427000809 | 4.054205277 | 4.448841775 | 1.096708978 | 2.749188242 | 0.707162879 | 6.459119332 | 0           |
| 0            | 5.008964014 | 2.780575498 | 0.146220259 | 2.269123557 | 2.28453558  | 5.559883208 | 2.034641    | 3.66126335  | 3.761283916 | 1.386588914 | 2.671997069 | 1.054083271 | 4.45587622  | 0           |
| 3.864525081  | 5.395934474 | 2.133328632 | 0.079538907 | 0.941633021 | 2.612114639 | 5.700978765 | 2.173114816 | 4.037879285 | 3.107118494 | 0.477378935 | 2.639214844 | 0.904258463 | 4.932535046 | 0.455240536 |
| 2.405119814  | 5.967960653 | 1.987142526 | 0.727066356 | 0.926689873 | 2.679534581 | 5.345387837 | 2.740458397 | 2.021213892 | 2.981460435 | 0.724381506 | 2.500109896 | 0.786310282 | 4.75121152  | 1.511374742 |
| 2.310968627  | 5.418646531 | 2.119250453 | 0.092502167 | 0.09377011  | 1.180508336 | 6.039929098 | 2.022934456 | 2.748157052 | 5.173351025 | 0           | 1.64715947  | 0.394467215 | 5.259119348 | 0.618640111 |
| 3.209016299  | 5.461505633 | 0.982169584 | 0.161102676 | 0.341107709 | 1.954976414 | 5.745118985 | 1.355138954 | 2.358866611 | 3.38568987  | 1.47938347  | 1.688589477 | 1.372727048 | 5.934563652 | 3.292263556 |
| 0.795679678  | 4.879371148 | 0           | 0.198599924 | 0.381738285 | 3.261342778 | 3.227146132 | 1.455848782 | 1.83972815  | 3.053084536 | 0           | 2.269148632 | 0           | 5.493739588 | 2.533550174 |
| 0.569646829  | 5.973955414 | 1.767689344 | 0.051597583 | 1.201868809 | 0.334439574 | 5.779942525 | 1.642338645 | 3.686992888 | 2.615361447 | 1.744865165 | 0.259428903 | 0.985389698 | 5.280000803 | 0.637962556 |
| 2.049332886  | 5.72654393  | 0.616472107 | 0.122717394 | 0.732035045 | 2.709821696 | 5.165626478 | 2.486606446 | 4.442066367 | 3.379912964 | 1.742323152 | 3.476440532 | 1.203630971 | 5.403091235 | 3.4205977   |
| 0.528128607  | 4.621005879 | 0           | 0.198818592 | 0.274118243 | 2.757541266 | 2.898320206 | 1.042805014 | 2.683287415 | 2.501272556 | 1.052115367 | 2.565256012 | 0.376527482 | 5.026669879 | 3.341962381 |
| 0.780444518  | 4.673624954 | 1.369854066 | 1.196195278 | 0.919254627 | 2.258458621 | 3.298675644 | 1.567752918 | 1.174888743 | 2.055252177 | 0.367909394 | 1.775428118 | 0           | 3.671983564 | 5.954221965 |
| 1.382661418  | 5.575300861 | 1.704188628 | 0.137679353 | 0.813871558 | 2.22832858  | 5.702703633 | 1.789838847 | 5.09991657  | 3.46255676  | 2.850150266 | 2.467658218 | 0.479575806 | 4.713379502 | 3.124572781 |
| 0.727709448  | 4.4824411   | 0           | 0.124922776 | 0.672706215 | 3.08847298  | 3.63536972  | 1.790942997 | 1.953921104 | 2.232754309 | 1.995368112 | 2.861606461 | 0.528616253 | 5.282027083 | 0.248996973 |
| 0.796464682  | 5.741751874 | 1.694583858 | 0.013263361 | 1.641225295 | 2.409407256 | 5.478687648 | 1.961431926 | 2.236549259 | 2.920285411 | 1.227803319 | 2.666810604 | 0.803732669 | 4.863727973 | 1.182409477 |
| 0.709039233  | 4.658247836 | 0.951746466 | 0.117511051 | 0.481555937 | 3.091580248 | 3.386240121 | 1.926897771 | 3.280021017 | 1.922724328 | 0.598190809 | 2.604591172 | 0.362277856 | 5.001949178 | 1.297560811 |
| 0            | 2.163976128 | 0.254483896 | 0.10950127  | 0.060959465 | 1.164897704 | 2.781533729 | 0.588461036 | 1.58050274  | 4.161773646 | 0           | 0.982496022 | 0           | 5.639126105 | 1.381746521 |
| 2.900248571  | 6.031791939 | 0.532148338 | 0.080527563 | 0.899131883 | 3.330170701 | 6.027530623 | 3.074238483 | 4.452346709 | 3.419907774 | 1.305717969 | 3.883148607 | 1.240635012 | 4.799880153 | 0.76234712  |
| 1.823260059  | 7.119931911 | 1.737892578 | 0.025282691 | 0.538880596 | 0.384736844 | 6.782075304 | 2.674292388 | 4.368188969 | 3.716111516 | 2.424207216 | 0.388160701 | 0.651585914 | 3.735432835 | 3.961710699 |
| 3.99190243   | 4.935969428 | 1.488792468 | 0.055898042 | 0.869525412 | 2.473262297 | 4.920417228 | 2.102680973 | 3.694933378 | 3.505045794 | 1.21710399  | 2.777756616 | 1.154883071 | 5.321309436 | 2.941792628 |
| 2.673272571  | 5.232179384 | 0.730949097 | 0.088491293 | 0.79743118  | 3.711022783 | 5.041012402 | 3.838687214 | 3.088551988 | 4.140413797 | 0           | 4.507563343 | 1.228908364 | 5.45762142  | 2.593153093 |
| 0.879327366  | 6.685263392 | 1.390554931 | 1.15553317  | 0.491635381 | 1.794430834 | 5.999959298 | 2.504188367 | 4.584322963 | 3.970965712 | 2.020854954 | 2.125316972 | 1.092669054 | 5.323758521 | 4.392966129 |
| 0.191828459  | 4.647064226 | 1.447230519 | 0.731810637 | 0.624304058 | 1.461698801 | 1.783158257 | 1.97376911  | 1.456618701 | 1.522579619 | 0.229814415 | 0.40842809  | 0           | 5.139982985 | 3.366103868 |
| 3.807998722  | 6.934585949 | 0.742446101 | 0.048185499 | 0.550174561 | 2.520806697 | 6.488786948 | 2.119578456 | 4.163318456 | 3.375373761 | 1.793980535 | 2.499150253 | 2.569346946 | 5.410757077 | 5.338064522 |
| 2.518418594  | 5.696702828 | 1.083225666 | 1.380416704 | 0.867031623 | 1.946529923 | 5.27264774  | 1.895610533 | 5.13107959  | 3.495059719 | 0.864279196 | 2.479970408 | 1.713243571 | 4.688975914 | 3.366390507 |
| 0.289200308  | 3.314016973 | 0           | 0.451273545 | 0.717317294 | 2.287856498 | 1.734926302 | 0.694028455 | 1.650552208 | 2.369937817 | 0           | 2.007531285 | 0           | 5.036134729 | 2.608606843 |
| 0.805574594  | 6.194296533 | 1.514735405 | 0.161867332 | 0.785254734 | 1.713979525 | 4.194999656 | 1.308146508 | 3.659013864 | 2.306706548 | 2.409647423 | 1.658238933 | 0.589280693 | 4.758466489 | 4.754084467 |
| 1.4364400528 | 6.387308614 | 2.253227495 | 0.060432916 | 2.207087368 | 1.807070755 | 5.828997107 | 2.121568441 | 4.515344036 | 3.466007728 | 2.362955207 | 2.528743231 | 1.591945699 | 4.916247538 | 3.465394403 |
| 2.380005487  | 6.530136598 | 0.695080478 | 0.162829558 | 0.595173418 | 2.547722247 | 5.038139855 | 1.24303682  | 3.500594653 | 2.960222023 | 1.239852858 | 2.647835429 | 1.09409215  | 4.062336242 | 3.43590081  |
| 2.119116462  | 6.384068018 | 0.864244144 | 0.112008829 | 0.490904988 | 2.252774146 | 6.053348017 | 1.827388117 | 4.82536984  | 3.408153122 | 2.132277724 | 2.676043759 | 0.809019415 | 5.095744868 | 2.210385555 |
| 2.548351687  | 6.794792335 | 0.980658945 | 0.309718879 | 0.846786547 | 2.903031294 | 6.512957026 | 2.571248956 | 3.413919655 | 4.000073897 | 2.163429606 | 3.119217009 | 1.756741683 | 5.291506195 | 2.716014215 |
| 1.566345101  | 6.261675856 | 0.837856883 | 0.305020372 | 0.150691676 | 2.302599902 | 5.118579328 | 3.411616639 | 4.292417863 | 4.957379085 | 1.931656583 | 3.186117418 | 1.548307618 | 5.783349774 | 4.556499583 |
| 0.490761986  | 4.799530123 | 0.740648089 | 0.229807458 | 0.951580363 | 2.080160449 | 4.013888752 | 0.98535289  | 2.740057653 | 3.762992636 | 0.988430364 | 2.372566264 | 0           | 5.294161785 | 1.394492557 |
| 0.349298162  | 4.872616238 | 4.879009647 | 0.726560321 | 1.350752661 | 1.483604759 | 5.021173367 | 2.111112504 | 2.651023094 | 3.957116308 | 2.412605454 | 0.66378916  | 1.509955675 | 3.274352166 | 1.814465616 |
| 4.412112623  | 7.141038259 | 0.296960069 | 0.213091189 | 0.38133007  | 1.516508077 | 6.71230981  | 2.420251814 | 5.429329644 | 4.112759124 | 2.91391672  | 1.888173828 | 2.21146     |             |             |

|             |             |             |             |             |             |             |             |             |             |             |             |             |             |             |
|-------------|-------------|-------------|-------------|-------------|-------------|-------------|-------------|-------------|-------------|-------------|-------------|-------------|-------------|-------------|
| 1.732510981 | 4.244037903 | 1.51854921  | 0.575889865 | 0.137462418 | 2.365918222 | 4.066182853 | 1.180986816 | 2.492242652 | 2.948533026 | 1.19042947  | 2.012314003 | 1.582336222 | 5.159163906 | 3.866360095 |
| 0.202057774 | 3.334067594 | 1.73266204  | 1.645292509 | 0.226726454 | 2.887803729 | 2.196187898 | 1.82145642  | 0.610660188 | 2.646906742 | 0.630088294 | 1.375570007 | 0.266441067 | 5.879016241 | 3.104028248 |
| 1.30482827  | 5.850092517 | 3.340735114 | 0.073443371 | 1.930131962 | 2.269896901 | 5.528804875 | 2.587610474 | 4.21392671  | 3.635429269 | 1.478018961 | 2.701308816 | 0.802420574 | 4.357150983 | 3.940887277 |
| 4.036421478 | 6.234271474 | 0.863747855 | 0.099446407 | 0.434587154 | 2.033784122 | 5.338657054 | 1.635627031 | 4.136994641 | 2.910029493 | 1.366273071 | 2.28417469  | 2.089588723 | 5.305093612 | 5.404976806 |
| 0.954863319 | 5.484086777 | 1.51833622  | 0.770392933 | 1.465382634 | 1.603983603 | 4.692844211 | 1.384919665 | 1.79365341  | 2.919582922 | 0.296188569 | 2.002618406 | 0.815291689 | 4.196036864 | 2.081906035 |
| 0.483624794 | 4.013205284 | 3.15596398  | 1.639948834 | 0.312428298 | 3.523753857 | 3.181450774 | 2.650528231 | 1.854945312 | 2.723746021 | 0           | 2.995247496 | 0           | 5.974280676 | 2.888368988 |
| 0.889200191 | 2.881344766 | 1.121582418 | 0.312789266 | 0.222325654 | 1.659516823 | 2.837098886 | 0.489247006 | 1.084127418 | 3.326939811 | 0           | 1.301397486 | 0           | 5.676864263 | 3.431382051 |
| 2.706617843 | 5.083259735 | 0           | 0.240274149 | 0.510405481 | 2.213135188 | 4.455953912 | 2.415603137 | 2.350156625 | 2.467912132 | 1.349945812 | 1.670691177 | 0.654172598 | 4.989837383 | 3.057705344 |
| 1.87859426  | 3.746384089 | 2.415341979 | 0.087651778 | 0.552382322 | 1.337124898 | 3.774960892 | 1.161319748 | 1.44380717  | 3.089599968 | 0.519487462 | 0.972047901 | 0           | 6.026459015 | 1.157075533 |
| 2.115603442 | 4.681487906 | 1.036643433 | 0.045215138 | 1.293160617 | 1.530658361 | 3.617081035 | 2.129271928 | 3.158535413 | 2.947566328 | 0           | 1.103893156 | 0.973668901 | 4.881876924 | 3.673704745 |
| 0           | 3.146214074 | 0.815526278 | 0.084611615 | 0.628057211 | 2.757356823 | 2.965861048 | 1.603307076 | 1.705841982 | 2.037083711 | 0           | 2.473607406 | 0           | 3.705711751 | 0.991633784 |
| 0           | 4.943276738 | 0.592879119 | 0.275392543 | 0.628955068 | 2.846705201 | 2.754012265 | 1.37323389  | 1.985026819 | 1.700708623 | 1.082810299 | 2.677253661 | 0           | 3.351524096 | 1.269206461 |
| 0.711244556 | 4.56772753  | 0           | 0.838397474 | 0.404351404 | 2.258300312 | 2.746923509 | 0.970974839 | 2.181560127 | 2.526962082 | 0.826812548 | 1.903749584 | 0           | 5.583321889 | 2.43071959  |
| 2.328715028 | 4.761866552 | 2.676579958 | 0.370714055 | 0.978236985 | 2.554968528 | 3.856633717 | 1.994257759 | 3.501515719 | 2.634516433 | 0           | 2.429577327 | 0           | 5.332127055 | 3.986901327 |
| 0.320465332 | 3.555313346 | 2.102627246 | 0.029678791 | 0.397683447 | 3.166553133 | 2.861989355 | 1.807014505 | 1.063372233 | 2.190021778 | 0.681733931 | 3.039887297 | 0.417479883 | 4.889535324 | 0           |
| 0.199372763 | 5.321749694 | 1.56713468  | 0.126498454 | 0.453188072 | 2.292095837 | 2.730048499 | 1.148596119 | 2.212950281 | 2.110002476 | 0.443513266 | 2.264619282 | 0           | 4.767645479 | 2.610430545 |
| 2.432928347 | 6.478158823 | 1.114822408 | 0.156670855 | 0.636166216 | 2.447630465 | 5.834746217 | 2.621901653 | 4.010227308 | 2.532913402 | 1.547636262 | 2.684310176 | 1.277820693 | 4.794391402 | 4.513044517 |
| 1.993663707 | 5.190372891 | 1.360521511 | 0.183064274 | 0.340267288 | 1.758631382 | 4.095531445 | 1.038519726 | 2.901404973 | 2.977834691 | 0.42751131  | 1.410310709 | 0.468046354 | 5.116010815 | 1.976880224 |
| 0           | 5.259847353 | 0.615008883 | 0.351973101 | 0.655181068 | 2.104805129 | 2.800894133 | 0.665549792 | 1.700654898 | 1.750494653 | 0.256899613 | 1.410117014 | 0.28281282  | 3.497447911 | 0.244122881 |
| 1.926914895 | 6.312623014 | 0.867858897 | 0.22479054  | 0.937448323 | 0.638680102 | 5.288106976 | 2.357026611 | 4.498911614 | 3.387120479 | 0.2949729   | 0.745294725 | 1.708681361 | 4.118926086 | 2.148474056 |
| 2.837209101 | 6.029274848 | 0.41248126  | 0.248419366 | 0.804592655 | 2.77764852  | 5.34657708  | 1.86379424  | 4.100806408 | 3.417159709 | 1.185388245 | 2.989366769 | 0.855228303 | 6.379875724 | 0.600827473 |
| 1.552903668 | 4.479086371 | 1.451381633 | 0.253286508 | 0.599300142 | 2.55877668  | 3.722860293 | 1.742257615 | 2.793233148 | 2.67621826  | 0.526415887 | 2.735103363 | 0           | 5.087985773 | 0           |
| 1.479977322 | 4.806879401 | 0.21985101  | 0.210397973 | 0.524942086 | 3.508542261 | 5.123738087 | 3.004756517 | 4.308654178 | 2.41405145  | 1.061048848 | 3.891685016 | 1.004300183 | 5.009716965 | 1.136852682 |
| 2.976110021 | 7.186391925 | 1.115365125 | 0.021077324 | 0.498983218 | 2.824098549 | 6.076765653 | 2.491551218 | 4.759254945 | 3.12830949  | 1.918445144 | 3.035773771 | 1.853524781 | 5.602403244 | 3.670533522 |
| 0.324262053 | 4.902819131 | 0.87548478  | 0.082658229 | 0.672564447 | 2.581859339 | 3.55326731  | 2.194393216 | 2.249256007 | 2.034551872 | 0.688903596 | 2.724288364 | 0           | 3.630606235 | 0           |
| 1.987769187 | 5.190110731 | 1.630230192 | 0.017063287 | 0.685304834 | 0.983085324 | 4.431157799 | 1.666071172 | 3.401266573 | 2.619325739 | 0.51825556  | 0.713055714 | 1.189450776 | 5.46218476  | 1.398041767 |
| 1.916018818 | 6.567495726 | 1.153672919 | 0.158198996 | 0.835891071 | 2.870367463 | 6.08505927  | 2.635205368 | 3.113792502 | 3.784223897 | 2.181610773 | 3.507907319 | 1.320180008 | 5.550783625 | 1.691662316 |
| 4.063561941 | 6.247446944 | 0.519894146 | 0.486114262 | 0.899557767 | 2.271120219 | 6.211408806 | 1.826700404 | 5.637769426 | 3.627008339 | 2.568379667 | 2.093635343 | 3.043852352 | 4.915608092 | 2.50204159  |
| 0.803830947 | 6.856832285 | 2.156227766 | 0.093966428 | 0.744428531 | 2.60208913  | 4.836622056 | 2.812228831 | 5.04528082  | 3.378519588 | 1.665971215 | 2.80686108  | 1.590860162 | 5.309390172 | 0.228130946 |
| 0           | 5.400001554 | 0.803998171 | 1.023838008 | 1.953020055 | 1.639210107 | 4.634735921 | 0.710990267 | 4.878840728 | 4.039907476 | 1.284467324 | 0.36644838  | 1.713361329 | 5.06988746  | 0.97835444  |
| 1.910251497 | 6.11246962  | 1.599434969 | 0.096475746 | 0.771100882 | 1.900762465 | 5.67106295  | 2.343472166 | 3.664981133 | 3.487295719 | 0.639989372 | 2.031410364 | 1.799672519 | 5.602079796 | 0.611775159 |
| 2.799171942 | 6.222475712 | 1.089459974 | 0.1029922   | 0.875126201 | 2.786643969 | 5.217943895 | 2.883702369 | 4.619312453 | 3.551094066 | 0.696322415 | 3.898802963 | 1.504940906 | 5.023496403 | 0.257749108 |
| 1.566122155 | 7.667097322 | 1.577452256 | 0.023450248 | 1.948195325 | 2.775192062 | 6.37675344  | 3.327098277 | 4.375901504 | 3.394490582 | 2.476167526 | 3.041261648 | 1.466722105 | 5.379683505 | 3.85952562  |
| 3.208164117 | 8.260628986 | 1.569072942 | 0.976660969 | 1.462491632 | 2.126272942 | 6.567200641 | 2.244125105 | 4.721104137 | 4.470660038 | 2.259044733 | 3.226098607 | 0.927218193 | 3.296176483 | 4.951203042 |
| 0.698396563 | 4.830520204 | 0           | 0.106103465 | 0.649082002 | 2.583190022 | 4.916917528 | 1.488993035 | 2.37390798  | 2.905295311 | 1.005889612 | 2.546059578 | 0           | 5.077263671 | 0           |
| 0.729998556 | 6.215624568 | 0.661433882 | 0.173366797 | 0.500596139 | 2.703843917 | 6.122754753 | 1.773265098 | 4.475043343 | 3.032865822 | 0.713536774 | 2.485993271 | 0.917346054 | 5.275835278 | 0           |
| 1.311903179 | 6.41269866  | 0.408545337 | 0.119991198 | 0.928469009 | 3.166040445 | 6.295795917 | 2.583312249 | 4.052342504 | 3.151399445 | 2.459698687 | 3.329064407 | 2.26329282  | 5.211728995 | 1.961715766 |
| 2.2558039   | 5.568442851 | 0           | 0.243160773 | 0.746944231 | 2.120736053 | 4.557287644 | 1.782166539 | 1.890351939 | 2.121703727 | 0.874728608 | 2.100860888 | 0           | 3.552816727 | 3.46658185  |
| 4.127857429 | 7.120981948 | 0.540900313 | 0.12825445  | 1.089463288 | 0.752765554 | 6.777333299 | 2.726987504 | 3.750351363 | 3.093362507 | 1.460107471 | 0.813448952 | 1.415701285 | 4.832147074 | 1.409594234 |
| 1.481363658 | 5.9750785   | 1.498833757 | 0.036106788 | 0.347522416 | 2.229237278 | 5.708847042 | 1.049250777 | 3.998139666 | 3.063410744 | 0.587066284 | 2.171487908 | 1.202869867 | 5.816047751 | 0.212068576 |
| 2.168997696 | 5.746033298 | 2.800359766 | 0.034088285 | 0.350283714 | 0.692412965 | 4.598701316 | 1.111700557 | 2.942257493 | 2.700508769 | 0.470973521 | 0.536583991 | 1.441352321 | 5.651578006 | 0.241948261 |
| 1.491611658 | 6.038999315 | 1.502636698 | 0.091685635 | 0.886299631 | 1.7068292   | 5.623529037 | 1.90162941  | 2.953899982 | 3.016892131 | 2.222557996 | 1.819566872 | 0.493101015 | 5.662629646 | 1.146747291 |
| 1.432082077 | 6.59020405  | 1.523467321 | 0.23005998  | 0.791487944 | 2.96623984  | 4.61966146  | 2.797487595 | 2.956945693 | 3.0650496   | 0.643803952 | 3.059220777 | 1.297594468 | 5.125499011 | 1.376358867 |
| 0.288719452 | 5.230749074 | 0           | 0.574114959 | 0.910773268 | 1.255131257 | 4.446041361 | 0.823531811 | 6.220747112 | 3.0977736   | 0.85367248  | 1.108637492 | 0.676130415 | 4.146414587 | 3.152049273 |
| 0.289665227 | 3.338039699 | 0.576200111 | 0.118321613 | 0.231310952 | 2.327013128 | 2.149543264 | 2.019684276 | 2.108499586 | 4.05610855  | 0.856000325 | 2.051320599 | 0           | 6.823391234 | 0.820672267 |
| 0.238531822 | 3.414589173 | 1.371708498 | 0.080099125 | 0.570210613 | 2.839774359 | 2.897372018 | 1.577212205 | 2.349444191 | 3.001888194 | 0.52269488  | 2.423363239 | 0.313333776 | 6.116941712 | 1.023316296 |
| 0.641202369 | 4.52295457  | 0           | 0.803315994 | 0.299075267 | 1.953965345 | 3.40161238  | 1.647117649 | 1.917970535 | 1.883279417 | 1.238235132 | 1.94007241  | 0.588199637 | 5.192417074 | 1.440514916 |
| 0.645107977 | 5.638444747 | 1.166636789 | 0.08790157  | 0.451525067 | 1.941132396 | 4.261426289 | 2.235774666 | 3.127784173 | 2.118760264 | 0.542461248 | 2.054517234 | 0.816197077 | 5.124042171 | 4.87192803  |
| 0           | 3.05541369  | 0           | 0.367992286 | 0.416885819 | 0.851624685 | 2.863503643 | 2.032738498 | 0.501303362 | 1.083737235 | 0.468672201 | 0.668919853 | 0.278867119 | 5.409552604 | 0.627262329 |
| 0           | 3.500064542 | 0           | 0.036238418 | 0.606042518 | 1.909592408 | 4.300594534 | 2.158697485 | 1.753202511 | 2.829451271 | 0.4964128   | 2.167612791 | 0           | 4.282022781 | 0.473528698 |
| 0           | 2.804729254 | 0           | 0.107644723 | 0.322417875 | 2.612352398 | 2.091823047 | 1.969593734 | 1.428916676 | 3.175288989 | 0.303955433 | 3.059782901 | 0.33409082  | 5.260118365 | 0.289064199 |
| 1.078393976 | 4.446994371 | 1.442575778 | 0.10840012  | 0.781084734 | 3.020028991 | 4.518283378 | 2.517742206 | 4.15019286  | 2.956511791 | 0           | 2.818043384 | 0.925949823 | 5.564993724 | 0.595287612 |
| 0.786122608 | 3.463607019 | 1.765152128 | 0.034517548 | 0.488063085 | 0.791507874 | 3.694987666 | 1.11626721  | 1.429125625 | 2.790423754 |             |             |             |             |             |

|             |             |             |             |             |             |             |             |             |             |             |             |             |             |             |
|-------------|-------------|-------------|-------------|-------------|-------------|-------------|-------------|-------------|-------------|-------------|-------------|-------------|-------------|-------------|
| 0.511287682 | 3.844377002 | 1.809027107 | 0.259013862 | 0.511982439 | 0.837295875 | 3.19640449  | 1.575995226 | 3.220908417 | 3.341636982 | 0           | 0.802378379 | 0           | 5.831391571 | 0.983379004 |
| 0.739307    | 3.745173821 | 1.842462708 | 0.27804642  | 0.381927945 | 2.685571874 | 2.871636235 | 1.781513606 | 1.539201038 | 1.880190849 | 0.492012615 | 2.553300258 | 0           | 3.946034475 | 1.106557973 |
| 0.490256272 | 4.171428921 | 1.358166619 | 0.121579294 | 0.84766814  | 1.417005017 | 3.896769577 | 2.512302873 | 1.87173256  | 2.945600725 | 0.576681369 | 0.664358015 | 0.34824161  | 5.803137186 | 2.717697208 |
| 2.36682499  | 6.015326316 | 0.794443604 | 0.312468374 | 1.661472671 | 2.659947843 | 4.91172015  | 2.51631997  | 5.600305187 | 3.789076648 | 1.145203829 | 3.274496883 | 1.884727085 | 5.789545821 | 2.942343624 |
| 0           | 4.293987341 | 0.199762907 | 0.124242136 | 0.520754323 | 1.900376212 | 3.797728661 | 0.91405333  | 1.642471944 | 1.505328748 | 0.407865127 | 1.466257875 | 0           | 3.650537357 | 1.51316883  |
| 0.684459246 | 4.130314526 | 0           | 0.043258446 | 0.232571088 | 2.26938909  | 3.660838111 | 1.34989888  | 2.112688458 | 2.223957386 | 0           | 2.148233889 | 0.268764483 | 5.770902171 | 1.707687354 |
| 2.887536988 | 5.162471207 | 0           | 0.105554734 | 0.638421219 | 2.941906508 | 5.568080015 | 2.842815672 | 4.111211767 | 2.976861364 | 1.587628439 | 3.503529544 | 1.560636263 | 4.396062919 | 1.128103954 |
| 1.532296302 | 6.018745687 | 1.480594987 | 1.412899923 | 1.01309465  | 3.168412114 | 6.235973799 | 3.661068705 | 4.36898999  | 3.556795139 | 1.209849172 | 4.207858422 | 1.672903919 | 5.09467001  | 2.500312208 |
| 1.727336803 | 5.613265368 | 1.828339404 | 0.647549723 | 0.983860588 | 3.421635288 | 4.152794281 | 3.508625711 | 2.822879072 | 3.381322384 | 1.521522773 | 3.482225512 | 1.02815231  | 3.590556679 | 1.307334938 |
| 0.375732187 | 5.769268038 | 1.983918721 | 1.261300317 | 0.477015785 | 2.540022992 | 5.462512808 | 3.109106206 | 4.079150693 | 3.354773139 | 2.205540878 | 2.463749921 | 0.486854425 | 3.965852342 | 3.657468344 |
| 0.702970685 | 5.445837581 | 0.429259659 | 0.137088684 | 1.10002894  | 2.134338245 | 5.398430606 | 1.75949623  | 3.711932697 | 3.980396086 | 0.817535902 | 2.277901788 | 0.509495015 | 6.189830951 | 0.444233894 |
| 0.524873721 | 5.170019753 | 1.294661398 | 0.188196121 | 1.640530537 | 1.750389927 | 4.796659981 | 1.746772321 | 3.795090755 | 3.322921611 | 2.158157967 | 1.866899105 | 1.473073125 | 4.767224162 | 3.097701295 |
| 2.73950597  | 5.56186813  | 0.702070714 | 0.155595028 | 0.989566206 | 2.734478467 | 5.986588152 | 2.01085247  | 3.748442872 | 2.8849312   | 1.250381891 | 2.66527283  | 0.595271625 | 4.608924949 | 2.531860578 |
| 0.281195918 | 2.800568436 | 1.129482292 | 0.16180618  | 0.465610922 | 0.639322325 | 2.051269267 | 1.064711707 | 1.3269004   | 1.473834762 | 0           | 0.670679679 | 0           | 4.139361721 | 1.574116094 |
| 0.983604567 | 4.589360638 | 2.67688547  | 0.292315308 | 0.918486937 | 1.883372691 | 4.458390499 | 1.959489111 | 2.279227455 | 2.920168326 | 1.31240566  | 1.56612922  | 0.730624293 | 5.621242577 | 3.278109547 |
| 0.573614068 | 2.985067509 | 0.621968909 | 0.331585167 | 1.250971989 | 1.413793868 | 2.229796869 | 1.353279363 | 1.998165776 | 1.997960078 | 0.671629849 | 0.970180404 | 0           | 5.242102058 | 1.207012075 |
| 0.722620733 | 2.845218969 | 1.419376113 | 0.292270879 | 0.135048875 | 2.169437391 | 3.438070283 | 1.732499838 | 1.535626141 | 3.767605815 | 0           | 2.040494818 | 0           | 6.272845125 | 1.166527863 |
| 0.455422613 | 3.732130962 | 1.017474827 | 0.20800014  | 0.311085407 | 0.59924351  | 2.607115295 | 1.551246284 | 1.300821385 | 2.087743997 | 0.536773001 | 0.475715342 | 0           | 4.841275002 | 1.046771248 |
| 0.462906592 | 5.167925727 | 1.417102233 | 0.777751062 | 0.892568147 | 2.657382398 | 3.773933807 | 2.076789061 | 2.93173578  | 3.468916961 | 0.940179691 | 2.599003386 | 0.820190681 | 5.883930416 | 3.176197185 |
| 1.581820862 | 6.001629074 | 0.703755932 | 1.245323165 | 1.142343565 | 2.358092276 | 4.907582077 | 3.056459007 | 2.805133617 | 3.458881188 | 0.428471271 | 2.700040564 | 1.724815436 | 5.49084127  | 5.919693781 |
| 3.209836934 | 6.692426831 | 0           | 0.045696313 | 0.346817019 | 1.675823262 | 7.067725078 | 1.394529011 | 5.206199059 | 4.499541595 | 3.810144556 | 1.857816015 | 1.079584343 | 5.132456985 | 4.864015597 |
| 0.891889652 | 4.570508763 | 2.737036487 | 0.30838683  | 1.036108353 | 2.75731149  | 4.417480574 | 1.755228361 | 4.228376071 | 3.685867904 | 1.449736512 | 2.79295551  | 0           | 4.804287677 | 1.719479446 |
| 1.518811877 | 6.714537715 | 0.247582104 | 0.861001588 | 1.089104496 | 2.593577578 | 5.126299232 | 2.113603653 | 3.265983429 | 3.080847758 | 1.795454252 | 2.870008864 | 1.61323599  | 4.894503006 | 3.476367245 |
| 1.602352706 | 4.924732203 | 0.292540625 | 0.197037955 | 1.086250037 | 2.751452403 | 4.202683691 | 1.753467155 | 2.449203033 | 2.625422574 | 0.800599198 | 2.616269627 | 0.63180235  | 5.811988834 | 3.044598103 |
| 1.965804243 | 5.680490687 | 1.502478336 | 0.230781552 | 1.355840489 | 2.70838824  | 4.855897403 | 2.441986056 | 4.008868354 | 2.590263067 | 1.708715438 | 2.860447317 | 0.356240727 | 3.370244793 | 3.637572705 |
| 1.737383524 | 5.239140527 | 1.194346713 | 1.794481227 | 1.840188163 | 2.788020356 | 4.926983626 | 1.725624527 | 1.859951291 | 2.914399201 | 0.49049767  | 2.700981533 | 0.535974888 | 4.687846184 | 2.272146717 |
| 0.880232413 | 4.846980353 | 1.079714107 | 0.275896797 | 1.352598199 | 1.8349531   | 4.243202673 | 1.06254815  | 2.874870139 | 2.556248057 | 1.698571739 | 1.434705266 | 0.748928178 | 4.911175293 | 1.551527367 |
| 1.303265458 | 5.303371322 | 1.009156429 | 0.320062501 | 0.50888003  | 1.715678706 | 4.78486376  | 1.682297931 | 2.862073943 | 3.210849839 | 1.3559241   | 2.66903439  | 0.992934205 | 5.563679491 | 3.554424885 |
| 2.268707712 | 5.263097802 | 1.002691039 | 0.230493113 | 1.174764127 | 2.892524117 | 4.448418606 | 2.620050314 | 3.764378168 | 3.189639912 | 0.733323512 | 3.204955789 | 0.986541165 | 5.740039229 | 2.372312462 |
| 1.768074526 | 6.64750101  | 0.845421122 | 0.389146881 | 0.960358406 | 1.827322953 | 6.08024501  | 2.313390811 | 4.681876861 | 3.878742587 | 1.60648589  | 1.991862997 | 0.405576152 | 5.487324127 | 3.777444442 |
| 0.839101986 | 6.076538336 | 0.28418945  | 0.432324484 | 1.730252333 | 0.804228694 | 5.14823331  | 2.299985259 | 4.573743192 | 3.663577484 | 0.781146093 | 0.676048832 | 0.340402129 | 5.181654603 | 2.344245497 |
| 0.386844034 | 5.449968452 | 0.226188607 | 0.065236554 | 0.699051401 | 0.56167197  | 5.137060432 | 2.292889876 | 4.711321511 | 3.253892633 | 1.853598458 | 0.371188055 | 0.271976241 | 5.794835075 | 0.613405158 |
| 0           | 3.199972393 | 0.425691977 | 0.256836843 | 0.501751977 | 1.9666831   | 3.018639083 | 1.525090083 | 2.422018947 | 3.178931493 | 0.462092402 | 2.110970879 | 0.27470117  | 4.926115599 | 0.618892839 |
| 2.976695271 | 6.370799364 | 0.345873362 | 0.052297076 | 0.510241372 | 2.936824297 | 4.63308278  | 2.978073449 | 4.23649303  | 3.254301137 | 1.316180905 | 3.320136537 | 1.867499879 | 5.869762804 | 2.462171181 |
| 2.290038576 | 6.252664434 | 0.778898159 | 0.0423675   | 1.677494617 | 0.505931303 | 5.643010431 | 1.758754185 | 4.423323696 | 3.095946004 | 1.12505783  | 0.476362397 | 0.727849264 | 5.974634989 | 4.088654925 |
| 1.754956129 | 3.758126893 | 0.682628019 | 0.142501832 | 0.552153643 | 1.934938184 | 3.029094922 | 2.110378468 | 2.015047324 | 2.834255194 | 0.529782285 | 2.418933534 | 0.989883882 | 5.011172412 | 1.421644856 |
| 0.690506032 | 2.877951826 | 2.057365325 | 0.503042139 | 0.96476028  | 2.556830484 | 1.768239625 | 2.086594719 | 2.139718053 | 3.116505519 | 0           | 2.345548182 | 0           | 3.982111854 | 0.769854136 |
| 0.401915388 | 3.8722606   | 0.437908086 | 0.071771357 | 0.037660022 | 2.200000295 | 3.687155579 | 2.106741754 | 2.034458814 | 1.644574987 | 0           | 3.04014179  | 0.28300151  | 3.797119754 | 0.453139217 |
| 0.366182417 | 3.55040056  | 1.692739452 | 0.133007971 | 0.910813477 | 2.177795921 | 2.902621509 | 1.626447123 | 2.538702544 | 2.03540802  | 0           | 2.266291054 | 0           | 4.558532771 | 1.218812851 |
| 0.9855408   | 3.929278877 | 1.057886459 | 0.920420948 | 0.593887676 | 2.076953356 | 2.447780438 | 1.171633444 | 2.516888296 | 2.023702798 | 0.375753241 | 1.653145178 | 0           | 5.01873028  | 3.195601158 |
| 0           | 3.35399494  | 0.62159105  | 1.176165907 | 0.502542356 | 2.613065515 | 2.949357058 | 2.962454177 | 2.072600086 | 2.50202999  | 0.374303996 | 2.863405856 | 0           | 5.311134022 | 2.214943069 |
| 0.942339878 | 4.862959641 | 0.267211553 | 0.131587552 | 0.184689934 | 2.420448501 | 3.919257852 | 1.645515282 | 2.586710368 | 1.675443947 | 0.533717699 | 3.202230245 | 0.320423621 | 3.853844565 | 2.500299937 |
| 0.318030802 | 4.222172313 | 0.347383867 | 0.351808245 | 0.962873711 | 3.316622828 | 3.527323459 | 1.755222164 | 2.817885228 | 3.943789342 | 0           | 3.276888608 | 0           | 5.729029621 | 2.312096407 |
| 0.311120377 | 4.075410351 | 0.339907651 | 2.652881434 | 0.919598821 | 3.109705396 | 2.384666277 | 2.691241366 | 1.038777167 | 1.724154992 | 0           | 2.856076912 | 0.721966837 | 3.418732451 | 2.363645752 |
| 0.256994601 | 3.622555907 | 2.004836214 | 0.130275919 | 0.148416388 | 2.930921263 | 2.240111213 | 2.840418541 | 2.574119733 | 2.39456811  | 0           | 3.615983776 | 0.839340478 | 4.747883622 | 0.922871449 |
| 0           | 3.943412325 | 1.086002954 | 0.019487872 | 0.384761343 | 2.059114849 | 3.741199064 | 1.740363489 | 2.819888652 | 2.299374844 | 1.688513635 | 2.620427281 | 0           | 4.13129916  | 1.520746476 |
| 0.262709724 | 4.964188812 | 1.950936695 | 4.389880207 | 0.146495298 | 2.888004414 | 2.594037019 | 2.235737124 | 2.47263041  | 1.742381371 | 0.313279811 | 2.536884493 | 0           | 3.693069656 | 0.297977341 |
| 0.309884835 | 4.812091133 | 1.215688404 | 0.338333281 | 0.241794246 | 2.052463538 | 3.966231712 | 1.210949177 | 2.256828197 | 3.293674744 | 0.368437006 | 3.004769728 | 0           | 4.070693549 | 2.639069801 |
| 0.331973473 | 3.556594947 | 2.864639948 | 1.247967021 | 0.610868616 | 3.221794028 | 2.196535822 | 1.739494533 | 0.539482822 | 2.733427041 | 0           | 2.978755712 | 0           | 5.127174581 | 2.666643185 |
| 0.573124292 | 4.627756695 | 2.714495301 | 0.123885324 | 0.790311451 | 2.670038001 | 3.662376785 | 1.88213641  | 2.047638415 | 2.605199705 | 1.252134328 | 2.679510141 | 0.729500138 | 5.224706947 | 0.951393967 |
| 0.593581554 | 3.570042075 | 0.35719734  | 0.200207455 | 0.255558231 | 2.120864901 | 3.060192125 | 1.618125581 | 2.765167236 | 1.756424912 | 0.946420737 | 2.638693375 | 0           | 4.493861844 | 0.908407871 |
| 0.48309224  | 4.183965313 | 0           | 0.25832835  | 0.630827038 | 2.879931692 | 2.789007004 | 1.910626383 | 0.606724352 | 1.716439018 | 0           | 2.985501924 | 0           | 5.121831392 | 1.245238809 |
| 0           | 4.021369441 | 0           | 1.201476823 | 1.471624339 | 2.258400189 | 3.272311149 | 1.882643955 | 1.305012181 | 3.080283166 | 0.          |             |             |             |             |



|             |             |             |             |             |             |             |             |             |             |             |             |             |             |             |
|-------------|-------------|-------------|-------------|-------------|-------------|-------------|-------------|-------------|-------------|-------------|-------------|-------------|-------------|-------------|
| 1.117080591 | 3.786240733 | 0.452832891 | 0.031860129 | 0.444575146 | 0.823527367 | 3.826629539 | 1.766955772 | 2.648140937 | 3.218380009 | 0.266395448 | 0.904365072 | 0.536713614 | 5.418861583 | 0.253186689 |
| 0           | 2.648684431 | 1.292557596 | 0.166425238 | 0.268591888 | 2.325771475 | 1.661845217 | 1.645848187 | 1.649416678 | 1.828428448 | 0.296072438 | 2.255368359 | 0           | 4.504896219 | 0           |
| 0.278995094 | 3.66405281  | 0.556827865 | 0.04556949  | 0.26541838  | 2.610526284 | 2.924956785 | 1.601293639 | 1.611886509 | 1.672277112 | 0.829607273 | 3.108937752 | 0           | 4.574156393 | 2.435933557 |
| 0.571535037 | 3.478968753 | 1.051870796 | 0.057443575 | 0.197530222 | 2.597633293 | 4.194472472 | 1.653622006 | 2.577638969 | 3.065946693 | 0           | 2.527391802 | 0.906484831 | 4.824458482 | 0.802799979 |
| 0           | 4.136106666 | 0.254533272 | 0.125064694 | 0.095384356 | 2.150150981 | 2.865302962 | 1.568853875 | 1.652751776 | 1.473034635 | 0           | 3.273078426 | 0.305477346 | 4.397001526 | 1.140537995 |
| 0           | 2.846928941 | 0.259578739 | 0.079572204 | 0.981086461 | 0.474039973 | 2.48601542  | 1.38652453  | 1.60135945  | 2.241863091 | 0.283141863 | 0.4915018   | 0.311428205 | 4.939680755 | 0.691857911 |
| 0.697847961 | 1.913864161 | 1.991233105 | 0.546872971 | 0.468943022 | 1.157993669 | 1.143566466 | 1.555923216 | 1.669252846 | 2.410683804 | 0           | 0.661656721 | 0.355887866 | 6.380454527 | 0.308226967 |
| 0.240320186 | 3.436960413 | 0.67830577  | 0.068282362 | 0.113792981 | 2.122331992 | 3.163630269 | 1.699086639 | 0.843306629 | 2.11597463  | 0           | 3.157785326 | 0           | 4.367865344 | 1.2971248   |
| 0.698506651 | 4.389192266 | 1.022403097 | 0           | 0.045507324 | 2.224600272 | 3.290653767 | 2.101599056 | 2.095803694 | 1.838275647 | 0           | 3.100405301 | 0.506052592 | 2.689795371 | 0.921632539 |
| 0           | 2.647708876 | 2.794637385 | 0.398701847 | 1.343746964 | 2.261211209 | 1.894720075 | 2.857622817 | 1.719558083 | 2.28766098  | 0           | 3.003936695 | 0.667670967 | 2.714681272 | 0           |
| 1.539212323 | 4.484946446 | 2.331554313 | 0.03406787  | 0.60394158  | 2.780725777 | 4.535214336 | 2.181847713 | 3.743050431 | 2.564271908 | 0.658751444 | 2.807459225 | 0.716347856 | 5.132469769 | 0.629877717 |
| 0.623218613 | 4.42045987  | 0.674861589 | 0.003253183 | 0.058940555 | 2.025907968 | 3.936373032 | 2.19817382  | 2.953616131 | 2.01818519  | 0           | 3.078679342 | 0.241531062 | 3.98052451  | 0           |
| 1.594363561 | 4.176058679 | 2.152346451 | 0.026319418 | 0.554403031 | 2.775588089 | 4.122084355 | 1.36341355  | 2.182542163 | 2.450644281 | 0.531956341 | 2.617479839 | 0.580562029 | 5.249579546 | 0           |
| 0.650153176 | 5.91022807  | 1.747097022 | 0.086576878 | 0.519591365 | 1.752497133 | 5.512131992 | 1.742463331 | 4.084476971 | 2.913715677 | 0.898532584 | 1.906118781 | 1.448022285 | 4.320720114 | 2.392530866 |
| 1.164885785 | 5.706659449 | 0.476925161 | 1.88934686  | 0.763460246 | 3.025182867 | 4.698916017 | 2.941096943 | 4.865183363 | 3.440254341 | 1.752848703 | 3.841014606 | 0.969137776 | 5.881084778 | 3.094515323 |
| 0.553124475 | 5.106808377 | 1.488166617 | 1.70519725  | 0.742584976 | 2.606249849 | 4.604515626 | 3.308222074 | 3.262815911 | 3.2854375   | 1.094083429 | 2.926385228 | 1.176871746 | 5.677492332 | 1.653917564 |
| 0.299727464 | 3.83555135  | 3.451699802 | 0.221496472 | 0.946148837 | 1.580537625 | 3.256723946 | 2.05142147  | 4.749545918 | 4.090641146 | 0           | 0.906722582 | 0           | 3.580001841 | 1.217964596 |
| 0           | 1.931148262 | 0.213670689 | 0.058088901 | 0.244311268 | 2.544614564 | 2.608655427 | 1.574457521 | 2.144520785 | 2.162049588 | 0           | 2.718053397 | 0.257142631 | 4.35462789  | 0.735025117 |
| 0           | 2.821141389 | 0           | 0.378134888 | 0.217609417 | 2.224037414 | 2.957248839 | 1.52122156  | 1.254812747 | 6.114798179 | 0           | 0.920570407 | 0           | 6.516485319 | 0.48937348  |
| 1.204959686 | 5.229421886 | 2.818008706 | 0.19955256  | 1.612510975 | 2.842295942 | 5.43338755  | 2.402605099 | 2.975072704 | 3.063727132 | 1.537057774 | 3.34342005  | 0           | 3.490232909 | 2.458912616 |
| 1.698392254 | 5.665309624 | 2.147963105 | 0.100527967 | 1.324055013 | 2.672275002 | 4.401821948 | 1.686880949 | 3.899623133 | 2.888792146 | 0.274690233 | 2.823356302 | 0.950208972 | 4.936167985 | 2.622539277 |
| 0.2044027   | 4.800646195 | 0           | 0.071592535 | 0.133710405 | 1.660093006 | 3.648316405 | 1.181381716 | 2.569255495 | 1.774641026 | 0           | 3.016205059 | 0.49643502  | 3.85779004  | 1.547540638 |
| 0.583099357 | 3.148327243 | 1.677731065 | 0.047253134 | 0.693859821 | 3.110119663 | 2.811122008 | 2.292276044 | 2.019750109 | 1.872975548 | 0.682386429 | 3.063284928 | 0.224037572 | 5.112233034 | 0.362947102 |
| 0           | 3.611765336 | 0.219885748 | 0.137115467 | 0.098420156 | 1.968537675 | 3.229721994 | 1.49240616  | 1.360834048 | 1.58893168  | 0           | 3.331338146 | 0.264510391 | 4.369745171 | 0.425063933 |
| 1.945881263 | 2.453540406 | 0.336199401 | 0.11031064  | 0.55552068  | 1.542654011 | 2.989738531 | 1.129123066 | 1.02969298  | 2.53977804  | 0           | 1.549893595 | 0           | 5.893976611 | 0           |
| 0.242383584 | 3.383851605 | 0           | 0.01753705  | 0.094606313 | 2.236479092 | 3.575662138 | 1.976732892 | 1.897365068 | 1.909709071 | 0           | 2.877851329 | 0           | 4.482186826 | 0           |
| 0.819479127 | 4.059853525 | 0.508035706 | 0.115137148 | 1.368404687 | 1.539542033 | 4.16190296  | 2.154879471 | 1.668125487 | 2.679977315 | 0.550234672 | 1.882834395 | 0.826902815 | 5.270234354 | 2.648627273 |
| 0.202496132 | 3.490685724 | 2.056765355 | 0.01085876  | 0.074125045 | 2.617742353 | 3.288302676 | 1.931278569 | 1.214409463 | 2.285078246 | 0.792364708 | 3.45005802  | 0.492229728 | 3.746674181 | 0           |
| 0           | 4.844314156 | 1.144171095 | 0.035894808 | 0.567819605 | 2.648338525 | 3.181885525 | 1.336664454 | 2.412240141 | 4.43862366  | 0.736046382 | 2.734821082 | 0.2447535   | 6.79866617  | 0.837566311 |
| 0.818928938 | 3.873546062 | 1.17965348  | 0.036383723 | 1.330519703 | 0.509351092 | 3.484868141 | 1.255592567 | 2.590186135 | 2.472652966 | 0           | 0.455926294 | 0.599757178 | 4.739914645 | 0           |
| 0.384580161 | 2.91648071  | 0           | 0.011006096 | 0.026957731 | 2.692322694 | 2.930769501 | 1.757836348 | 1.225547972 | 1.808409636 | 0.245459024 | 3.237403207 | 0           | 4.089314862 | 0           |
| 0.833963593 | 3.872903548 | 0           | 0           | 0.045740107 | 2.378214975 | 4.278785911 | 2.267730149 | 1.612252198 | 1.692189138 | 0           | 2.915384871 | 0           | 4.321828191 | 1.32087442  |
| 0           | 2.864532702 | 0.500043709 | 0.840145885 | 0.865954212 | 2.668220355 | 2.399255653 | 2.31984153  | 2.486404959 | 2.066580089 | 0.29612378  | 2.816532082 | 0.32556682  | 5.041917973 | 0           |
| 0.686068257 | 3.43314662  | 2.634406712 | 1.434006795 | 0.518377433 | 3.246209299 | 3.136419674 | 1.485384346 | 1.976221557 | 3.353111773 | 0.63647607  | 3.409853517 | 0           | 5.087479904 | 0.765028832 |
| 0.21480051  | 5.047098838 | 1.163861197 | 0           | 0.078843112 | 2.623172956 | 3.076348348 | 1.74206747  | 1.426634372 | 1.610105563 | 0           | 3.111162539 | 0.282862276 | 3.002446144 | 1.074812267 |
| 1.704709661 | 4.619918499 | 1.447257859 | 0.328416835 | 1.200745502 | 2.483204912 | 4.764941344 | 1.708403183 | 4.222534448 | 3.17636057  | 0.707696119 | 2.605833618 | 0           | 3.897947255 | 1.763780787 |
| 0           | 2.955389827 | 0.371395274 | 0.0991209   | 0.117490764 | 2.458029472 | 3.13391008  | 1.884935355 | 1.518299631 | 1.464963345 | 0           | 2.921339739 | 0           | 4.401874036 | 0.205083512 |
| 0.162788759 | 1.868777984 | 0.611112868 | 0.008614369 | 0.048818586 | 2.554655325 | 1.554684342 | 1.582455891 | 0.504556425 | 1.438886828 | 0           | 3.054966341 | 0           | 3.233466039 | 0.631169089 |
| 0.215524945 | 3.570645378 | 3.566799379 | 0.322428076 | 0.699052249 | 2.932011496 | 3.460739178 | 1.729221839 | 1.880752261 | 2.172423784 | 0.257799238 | 2.904658807 | 0           | 3.836821484 | 0.799344453 |
| 0           | 3.925193826 | 0.735215172 | 0.014444523 | 0.164553414 | 2.466827766 | 3.660645748 | 1.890196434 | 1.440802051 | 2.056977851 | 0.242178796 | 3.056610296 | 1.011088371 | 3.859766051 | 0           |
| 0.708380124 | 4.330381561 | 0.765394966 | 0.067196089 | 0.989216877 | 0.806230723 | 3.005028325 | 1.642102221 | 2.96446465  | 2.855462863 | 0.469791614 | 0.682461656 | 0           | 5.044043404 | 1.586197519 |
| 1.165618209 | 4.434976296 | 0           | 0.092872465 | 0.386325713 | 2.040224822 | 3.919040888 | 1.747830964 | 3.490717379 | 3.647019729 | 1.238017551 | 2.378700557 | 0.588073186 | 5.646497231 | 1.192381275 |
| 0           | 4.850272649 | 1.262950844 | 0.15906509  | 0.30743067  | 2.3438705   | 1.925263401 | 1.250526549 | 0.530562158 | 1.152203127 | 0           | 3.209818282 | 0           | 5.082065348 | 1.603718656 |
| 0.230562115 | 4.33292078  | 0.654333905 | 0.041189008 | 0.309127689 | 2.794193679 | 3.757753986 | 1.582222092 | 3.271376046 | 2.953318382 | 0.506756307 | 2.278413642 | 0.30311636  | 5.888480291 | 0.844953238 |
| 0.632881274 | 3.419270588 | 0.266184896 | 0.008824286 | 0.058738971 | 2.222142879 | 3.464692436 | 1.631290592 | 1.193306742 | 1.853115341 | 0.290289569 | 2.907958689 | 0           | 3.288747536 | 0.507592362 |
| 0           | 2.922117426 | 0           | 0.010717179 | 0.056291485 | 2.546506685 | 4.134187854 | 1.526939122 | 1.797443114 | 1.984871535 | 0           | 3.061623766 | 0           | 4.273620279 | 0           |
| 0.466854048 | 4.388268181 | 0           | 1.360475603 | 0.323824713 | 2.455687814 | 3.963723239 | 3.29474862  | 3.093141368 | 3.230743725 | 0           | 2.64723395  | 0.330857499 | 6.392454753 | 2.17348539  |
| 0.192827421 | 2.541463235 | 0           | 0.006879425 | 0.125964595 | 2.998924718 | 2.541015086 | 1.882580749 | 0.17032336  | 1.980001312 | 0           | 3.405297064 | 0           | 4.397021891 | 0.21941153  |
| 0.960393306 | 4.278402891 | 0.231454818 | 1.169145367 | 0.927475806 | 2.173062839 | 3.71749893  | 2.303466625 | 1.911792711 | 3.225188397 | 0.820224098 | 2.192172193 | 0           | 5.395577768 | 2.558015765 |
| 0           | 3.537265171 | 1.021108815 | 0.099894484 | 0.038255131 | 2.005442579 | 2.524747428 | 1.189841723 | 1.566238007 | 1.380712072 | 0           | 3.304067577 | 0           | 3.147126004 | 0           |
| 0.584740405 | 3.285641918 | 0.633843301 | 0.312920681 | 0.693451972 | 2.062847664 | 3.002266816 | 2.068016621 | 3.15103983  | 2.718826672 | 0           | 1.821207894 | 0           | 4.760244595 | 1.226182491 |
| 0           | 3.847073609 | 0.710043071 | 0.094081874 | 0.017002402 | 1.800344592 | 3.644708032 | 1.099442676 | 1.594069327 | 1.419560006 | 0           | 2.784874251 | 0           | 3.161389543 | 0           |
| 0.377608439 | 4.33712831  | 1.406729048 | 0.130935025 | 0.618906069 | 2.515973021 | 4.562374485 | 1.969940294 | 2.223555733 | 2.660333134 | 0.787930176 | 2.561482719 | 0.853858666 | 5.870515418 | 0.426168187 |
| 0.789692626 | 4.13304049  | 0.851531855 | 0.074195277 | 0.220297036 | 2.142149465 | 3.394358205 | 1.81446931  | 2.799059205 | 2.000488073 | 0           | 3.317636115 | 1.399786253 | 4.335634228 | 1.081364438 |
| 0.748723635 | 4.542553772 | 1.524799247 | 0.220156253 | 0.43299806  | 0.218831828 | 3.749871593 | 1.961247176 | 2.194359564 | 2.14584927  | 1.162937028 | 0.2520      |             |             |             |

|             |             |             |             |             |             |             |             |             |             |             |             |             |             |             |
|-------------|-------------|-------------|-------------|-------------|-------------|-------------|-------------|-------------|-------------|-------------|-------------|-------------|-------------|-------------|
| 0           | 5.522699353 | 2.689111489 | 0.360825151 | 1.262882206 | 4.320321537 | 4.053075182 | 2.714800027 | 3.078897298 | 2.421349184 | 0.414681417 | 4.866230064 | 0.454180906 | 3.826829034 | 0.959779173 |
| 0.25607269  | 4.202591533 | 1.441068695 | 0.004675355 | 0.147864117 | 3.341139152 | 3.858889249 | 2.162658606 | 1.961003635 | 1.988001245 | 0.305495063 | 3.339681409 | 0.607952613 | 4.226529677 | 0           |
| 1.315884081 | 4.036495012 | 0.769520304 | 0.045452417 | 0.404994317 | 2.873495332 | 3.34043279  | 1.596765027 | 1.994030903 | 2.801435467 | 0           | 2.297848506 | 0.36412546  | 4.590064841 | 2.06264384  |
| 0.34788177  | 3.666668255 | 2.612912991 | 0.089230956 | 0.337741934 | 2.668698075 | 3.217771682 | 2.463685412 | 0.77977839  | 2.179471925 | 0           | 2.847662805 | 0           | 4.864089623 | 2.510553327 |
| 0.855254578 | 4.182654346 | 0.920779583 | 0.212731903 | 0.7292205   | 2.696453525 | 4.023293684 | 1.718900865 | 2.441260761 | 2.330029705 | 0.576498824 | 2.088279087 | 0.348122801 | 4.141710521 | 3.488361955 |
| 1.546696418 | 4.334803845 | 0.277521534 | 0.0590043   | 0.311771692 | 2.556231852 | 3.928154436 | 1.287666474 | 2.011058497 | 2.831507522 | 1.736915828 | 2.197146766 | 0           | 5.827271535 | 0.28772032  |
| 0.625234595 | 3.124180219 | 1.26138015  | 0.176252251 | 0.934904886 | 1.367192034 | 2.940472723 | 1.553165551 | 2.113524078 | 2.283029456 | 0           | 1.457081596 | 0           | 3.984147149 | 0.501208336 |
| 0.726220502 | 3.733628288 | 2.859919678 | 0.020882647 | 0.765741049 | 2.606669094 | 3.774749384 | 1.944891407 | 2.431816515 | 2.92018202  | 1.640937515 | 2.490788608 | 0           | 5.17577045  | 1.323727809 |
| 0.894199717 | 4.233051054 | 2.671466024 | 0.358618672 | 0.613640208 | 2.35460825  | 4.938803268 | 2.385642172 | 3.003971308 | 3.470430685 | 1.625326375 | 0.224848393 | 0           | 5.020851138 | 2.982480035 |
| 4.021373792 | 6.110725635 | 1.633550963 | 0.089050373 | 0.23440051  | 2.706021727 | 6.933021827 | 1.519027316 | 3.124335858 | 4.366305237 | 1.108702852 | 3.778425691 | 2.074692521 | 5.753212334 | 5.079807611 |
| 4.189671775 | 5.164486227 | 2.511978631 | 0.099250697 | 0.317768253 | 1.676330218 | 5.508614937 | 1.553212843 | 3.082061368 | 4.525635085 | 0.798426241 | 2.334270972 | 2.004166009 | 4.745051299 | 0.552046472 |
| 3.357590338 | 5.519639638 | 1.551823626 | 0.45173789  | 0.393823884 | 0.395382222 | 5.565281639 | 2.264529625 | 3.350681368 | 3.942116961 | 0.382479529 | 0.583149674 | 1.008583378 | 5.14881718  | 1.284427122 |
| 0.695077356 | 2.445455997 | 0.423997575 | 0.220965527 | 0.446854201 | 2.013373032 | 3.011371377 | 0.682404511 | 2.908576551 | 3.659960826 | 0           | 1.775286961 | 0           | 5.45849074  | 1.942579028 |
| 0.966784178 | 3.387732749 | 1.409107991 | 0.032507492 | 0.415706906 | 2.17747667  | 3.144753191 | 1.386794575 | 2.920618829 | 2.177578079 | 0.581803129 | 2.337985717 | 0           | 5.141490625 | 0.955861904 |
| 0.366806926 | 3.39346931  | 0           | 0.145926002 | 0.215206258 | 0.293597204 | 3.591261901 | 1.728756011 | 3.747431096 | 2.078370189 | 0           | 0.155404517 | 0           | 4.813831051 | 0           |
| 2.484236953 | 3.942468994 | 1.181551939 | 0.006908418 | 0.675386258 | 0.203476521 | 4.000322056 | 2.203457323 | 2.007253523 | 3.057483548 | 0           | 0.143754813 | 0           | 5.685621307 | 5.444857568 |
| 2.142950786 | 4.242449026 | 0.323590721 | 0.053899864 | 0.608850592 | 0.855620454 | 5.10772876  | 2.193627794 | 2.376166403 | 3.836289381 | 0.352290195 | 0.831722139 | 0.691207623 | 4.922463767 | 1.033186741 |
| 1.241189762 | 5.892934771 | 1.325179977 | 0.292898013 | 0.31686831  | 3.132856658 | 7.536871571 | 3.224932428 | 2.639000476 | 2.974541937 | 1.164885492 | 3.693959674 | 0.941192128 | 3.542703634 | 0.4768174   |

### The test set

| id                           | age | grade | stage | M | T | MIR324      | XIST        | MIR210      | MIR25       | GABPB1.AS1  | LINC00894   | SNHG7       | FGD5.AS1    | MIR22HG     | MIR126      |
|------------------------------|-----|-------|-------|---|---|-------------|-------------|-------------|-------------|-------------|-------------|-------------|-------------|-------------|-------------|
| TCGA-CJ-6033-11A-01R-1858-07 | 0   | 4     | 1     | 2 | 2 | 0.423758576 | 1.774511129 | 0.605435533 | 0.541240885 | 0.578250392 | 0.210684135 | 2.766387983 | 5.10113994  | 2.869272594 | 0.925799049 |
| TCGA-CZ-5984-11A-01R-1672-07 | 0   | 3     | 1     | 1 | 0 | 0.184250443 | 0.001103974 | 0.187391932 | 0.932194695 | 0.548654848 | 0.213201265 | 2.348907139 | 5.203332882 | 3.741524511 | 0.621520036 |
| TCGA-CZ-4865-11A-01R-1503-07 | 1   | 2     | 1     | 1 | 0 | 0           | 2.328843557 | 0.547993771 | 1.493237877 | 0.591588621 | 0.260960168 | 2.585594648 | 6.118883206 | 3.535878892 | 0.676220939 |
| TCGA-CJ-5678-11A-01R-1541-07 | 0   | 3     | 1     | 2 | 1 | 0           | 0.003427006 | 0           | 0.645512292 | 0.294260866 | 0.035607773 | 2.332400781 | 5.261142852 | 3.362677958 | 0           |
| TCGA-CZ-5458-11A-01R-1503-07 | 0   | 3     | 1     | 1 | 2 | 0.123968392 | 0           | 0.630552675 | 0.163031905 | 0.505320481 | 0.084603019 | 2.417820495 | 5.861753631 | 4.651786329 | 0.161217145 |
| TCGA-CZ-5454-11A-01R-1503-07 | 0   | 2     | 1     | 2 | 1 | 0.24105013  | 0           | 0.45451078  | 0.97810819  | 0.750956274 | 0.247111086 | 2.083761756 | 5.751243723 | 3.57660018  | 0           |
| TCGA-CW-6090-11A-01R-1672-07 | 1   | 3     | 1     | 1 | 0 | 0           | 0.002200799 | 0           | 1.061220927 | 0.703789363 | 0.265571536 | 2.11665476  | 5.436677986 | 3.273014934 | 0.237545779 |
| TCGA-A3-3387-11A-01R-1541-07 | 0   | 2     | 1     | 1 | 0 | 0.40325     | 0           | 0.219306143 | 1.053073685 | 0.498897888 | 0.129943891 | 2.192274703 | 4.988400416 | 3.94430098  | 0.510880692 |
| TCGA-CJ-5679-11A-01R-1541-07 | 1   | 4     | 1     | 1 | 2 | 0           | 0.002166821 | 0.347484005 | 0.919598345 | 0.566013457 | 0.191733525 | 2.25232309  | 5.446084945 | 4.155398913 | 0.234157759 |
| TCGA-CW-5580-11A-02R-1672-07 | 1   | 3     | 1     | 2 | 2 | 0           | 2.062755009 | 0.159639041 | 1.250366488 | 0.709588861 | 0.274604674 | 2.45621765  | 5.798934457 | 3.72323509  | 0.540290102 |
| TCGA-B0-5701-11A-01R-1541-07 | 0   | 4     | 1     | 1 | 2 | 0           | 0.001137543 | 0.514771648 | 0.458719273 | 0.591676841 | 0.133523426 | 2.420296189 | 5.390304842 | 3.077164498 | 0.244836818 |
| TCGA-A3-3358-11A-01R-1541-07 | 0   | 2     | 1     | 1 | 0 | 0.617148764 | 2.619590617 | 0.446112932 | 1.6486326   | 0.535032156 | 0.280167165 | 2.605699634 | 5.867546222 | 3.768518254 | 0.768428925 |
| TCGA-CZ-5465-11A-01R-1503-07 | 1   | 2     | 1     | 1 | 2 | 0           | 1.71248891  | 0           | 0.667027567 | 0.546544127 | 0.08742266  | 2.343893448 | 6.062220341 | 3.566486167 | 0.52171633  |
| TCGA-CW-5581-11A-01R-1541-07 | 0   | 3     | 1     | 1 | 0 | 0           | 0           | 0           | 1.13344063  | 0.280737195 | 0.126953999 | 2.468011887 | 5.162362558 | 3.041573084 | 0.557686815 |
| TCGA-CW-5591-11A-01R-1541-07 | 0   | 2     | 1     | 2 | 2 | 0.356504127 | 0           | 0.651529711 | 0.247173854 | 0.358800679 | 0.10696826  | 1.754311687 | 3.946357119 | 1.768833503 | 0.453504367 |
| TCGA-CZ-5467-11A-01R-1503-07 | 1   | 4     | 1     | 1 | 2 | 0           | 0.91865786  | 0.466111847 | 0.414624977 | 0.24065099  | 0.059383701 | 1.540283685 | 5.309006702 | 4.653360075 | 0           |
| TCGA-CZ-4863-11A-01R-1503-07 | 0   | 3     | 1     | 1 | 2 | 0           | 1.469485604 | 0.61773031  | 0.765438914 | 0.450146277 | 0.138050512 | 2.448819075 | 5.899575892 | 2.984530673 | 0           |
| TCGA-CW-5585-11A-01R-1541-07 | 0   | 2     | 1     | 2 | 2 | 0.166912829 | 0           | 0           | 0.575907052 | 0.252314587 | 0.055343358 | 2.445829264 | 5.235789152 | 3.824903846 | 0.40406197  |
| TCGA-B0-5697-11A-01R-1541-07 | 0   | 2     | 1     | 1 | 0 | 0           | 0.001510918 | 0.464372586 | 0.320339512 | 0.341932448 | 0.144951991 | 1.648054333 | 5.379947805 | 3.887466888 | 0.31695593  |
| TCGA-CJ-5676-11A-01R-1541-07 | 0   | 3     | 1     | 1 | 2 | 0           | 0           | 0           | 0.718323148 | 0.400810218 | 0.066464774 | 2.231318537 | 5.252813564 | 4.17967765  | 0.213402414 |
| TCGA-B0-5711-11A-01R-1672-07 | 0   | 3     | 1     | 1 | 2 | 0           | 0.000983712 | 0           | 0.720162788 | 0.804260014 | 0.12756973  | 2.450175869 | 5.73739922  | 3.388798765 | 0.214047635 |
| TCGA-BP-4163-01A-02R-1325-07 | 0   | 3     | 1     | 1 | 2 | 0.272726949 | 2.040929114 | 1.640956868 | 2.01862511  | 1.411722627 | 1.022938632 | 1.338396533 | 4.299806039 | 2.354249151 | 0.630756013 |
| TCGA-A3-3320-01A-02R-1325-07 | 0   | 0     | 1     | 1 | 0 | 0.933075831 | 5.156265877 | 2.369170925 | 1.688331196 | 1.506302809 | 1.258989153 | 2.571875303 | 4.427215191 | 3.773057894 | 3.167991903 |
| TCGA-B0-4703-01A-01R-1277-07 | 0   | 4     | 1     | 2 | 2 | 0.672809855 | 0.006008735 | 2.008949369 | 1.755613718 | 0.75414063  | 1.196547269 | 2.535482013 | 4.617255319 | 2.648641346 | 1.74361757  |
| TCGA-CW-6097-01A-11R-1672-07 | 0   | 4     | 1     | 1 | 2 | 0           | 0.004021632 | 1.124444102 | 1.217036168 | 0.854860515 | 0.12942451  | 1.873182166 | 4.499160698 | 2.654861391 | 0.726439739 |
| TCGA-MM-A564-01A-11R-A266-07 | 1   | 2     | 1     | 3 | 1 | 1.058869154 | 0.012243211 | 3.29630378  | 3.229203939 | 1.149919031 | 0.602258795 | 5.481691476 | 4.067585269 | 1.945764409 | 4.011717959 |
| TCGA-BP-5192-01A-01R-1426-07 | 0   | 2     | 1     | 1 | 0 | 0           | 0.001044814 | 2.341785786 | 0.894907459 | 0.542413651 | 0.10175281  | 3.932624126 | 4.095907131 | 2.27631581  | 0.887040873 |
| TCGA-CJ-4920-01A-01R-1426-07 | 0   | 2     | 1     | 1 | 0 | 1.193708723 | 3.881392462 | 1.39972301  | 2.07673017  | 1.504410628 | 0.490332421 | 2.950143258 | 4.267720346 | 3.694358016 | 2.268063817 |
| TCGA-B2-5641-01A-01R-1541-07 | 1   | 3     | 1     | 1 | 0 | 0.190502781 | 0.002286993 | 0.193743883 | 1.527146045 | 0.734261965 | 0.084077544 | 1.502786509 | 3.979546049 | 1.975733501 | 0.802402783 |
| TCGA-CZ-5459-01A-01R-1503-07 | 0   | 3     | 1     | 1 | 2 | 0.23768756  | 0           | 1.186819468 | 0.967320952 | 0.638747371 | 0.196521715 | 4.331374831 | 3.710171403 | 1.921392484 | 1.846358521 |
| TCGA-A3-3323-01A-02R-1325-07 | 0   | 0     | 1     | 1 | 0 | 0.662914344 | 0.015676745 | 1.755114512 | 3.294837527 | 2.408991321 | 0.723248165 | 2.624576036 | 4.32224568  | 2.603038567 | 3.733014442 |
| TCGA-BP-4161-01A-02R-1325-07 | 1   | 3     | 1     | 1 | 0 | 0.916059426 | 0.003590823 | 2.423548561 | 2.305100494 | 1.962033232 | 0.827869509 | 2.284346644 | 4.481253905 | 2.488821332 | 1.651960099 |
| TCGA-B8-4143-01A-01R-1188-07 | 1   | 3     | 1     | 2 | 2 | 1.21249948  | 4.165786343 | 4.837604519 | 4.544291224 | 3.604429472 | 1.849408169 | 4.649642183 | 4.757716997 | 3.650259039 | 1.798999734 |
| TCGA-CZ-4866-01A-01R-1503-07 | 1   | 3     | 1     | 1 | 0 | 1.11195523  | 1.544592065 | 2.770096937 | 1.706291533 | 1.430546515 | 1.143383027 | 2.0403374   | 4.391367971 | 3.194201099 | 0.436316162 |
| TCGA-B8-A54J-01A-11R-A33J-07 | 0   | 2     | 1     | 1 | 1 | 1.436364766 | 0           | 2.480377157 | 2.360836301 | 1.268324615 | 0.558379256 | 3.469957864 | 4.257956734 | 3.382110947 | 4.449486696 |
| TCGA-B2-3923-01B-10R-A277-07 | 0   | 2     | 1     | 1 | 1 | 0           | 0.41290208  | 0           | 0           | 3.444476789 | 3.01015859  | 2.544793738 | 6.184994672 | 3.185586281 | 0           |
| TCGA-CW-5580-01A-01R-1672-07 | 1   | 3     | 1     | 2 | 2 | 0.822706371 | 3.988939231 | 0.740611277 | 1.608772472 | 0.413818238 | 0.261122709 | 2.610379222 | 4.687847665 | 2.851133733 | 0.194970048 |
| TCGA-AK-3460-01A-02R-1277-07 | 0   | 2     | 1     | 1 | 0 | 0.552959005 | 0.137164071 | 3.257088509 | 1.520229434 | 0.910790853 | 0.486736863 | 4.019050271 | 4.476588074 | 3.180766873 | 0.943503489 |
| TCGA-BP-5177-01A-01R-1426-07 | 0   | 3     | 1     | 1 | 0 | 0.560384087 | 3.85755208  | 1.384587678 | 1.179998043 | 0.497312606 | 0.314782773 | 3.593211966 | 4.269564724 | 2.504992065 | 0.502796775 |
| TCGA-B8-5549-01A-01R-1541-07 | 0   | 3     | 1     | 1 | 0 | 0.204826956 | 0.088731557 | 1.864124271 | 0.85884822  | 0.210562193 | 0.06106227  | 2.420331412 | 4.339122449 | 2.621845476 | 0.487495714 |
| TCGA-B2-3923-01A-02R-1325-07 | 0   | 2     | 1     | 1 | 1 | 0.456180805 | 0.010514297 | 0           | 1.31476661  | 1.267547891 | 1.03844722  | 3.1676088   | 5.533900654 | 4.05696761  | 1.153869862 |
| TCGA-CZ-5982-01A-11R-1672-07 | 0   | 2     | 1     | 1 | 0 | 1.018843031 | 3.525357146 | 1.133716224 | 1.464333681 | 1.226578577 | 0.218607138 | 1.815877469 | 4.372073961 | 3.597941036 | 0.825979739 |
| TCGA-BP-4982-01A-01R-1334-07 | 0   | 3     | 1     | 1 | 0 | 0.528269473 | 0.004474216 | 2.09228421  | 1.98111767  | 1.385315008 | 0.810564826 | 2.815815321 | 4.673657725 | 3.033148678 | 2.25921154  |
| TCGA-A3-3358-01A-01R-1541-07 | 0   | 2     | 1     | 1 | 0 | 1.698426199 | 3.862673901 | 0.972802975 | 2.477605536 | 0.621599718 | 0.65213548  | 3.02244565  | 4.585153714 | 2.693791487 | 2.290739969 |
| TCGA-CZ-5461-01A-01R-1503-07 | 0   | 4     | 1     | 2 | 0 | 0.411042563 | 0           | 0.834435981 | 1.384936326 | 0.273179689 | 0.105554461 | 2.775875414 | 4.701756389 | 2.178875006 | 0.785700531 |
| TCGA-6D-AA2E-01A-11R-A37O-07 | 1   | 2     | 1     | 3 | 0 | 0.511810328 | 1.731167988 | 1.663528531 | 1.829861529 | 0.718514977 | 0.903969374 | 2.649458624 | 4.794021197 | 4.41771234  | 1.92809458  |
| TCGA-AK-3461-01A-02R-1277-07 | 1   | 2     | 1     | 1 | 0 | 1.680807472 | 0.095918725 | 2.913483639 | 2.073420641 | 1.7762912   | 0.838857617 | 3.092023539 | 4.435968858 | 3.433181986 | 2.45742822  |
| TCGA-B0-5095-01A-01R-1420-07 | 1   | 3     | 1     | 1 | 2 | 0.220065499 | 0.001335316 | 2.066216352 | 1.947216828 | 0.98769993  | 0.636531713 | 2.780366091 | 4.455359959 | 2.511883868 | 1.665076198 |
| TCGA-B0-4821-01A-01R-1503-07 | 1   | 3     | 1     | 1 | 2 | 2.035045434 | 1.651470185 | 2.839789693 | 2.119109671 | 1.064718889 | 0.944967701 | 4.005091109 | 3.791807438 | 2.791062943 | 1.35346636  |
| TCGA-B0-5092-01A-01R-1420-07 | 0   | 3     | 1     | 2 | 0 | 0.632245508 | 3.586473321 | 3.833167944 | 3.100547408 | 1.299675714 | 1.423352529 | 3.051631539 | 4.145583717 | 3.430017446 | 1.552113052 |
| TCGA-CJ-4908-01A-01R-1426-07 | 0   | 2     | 1     | 1 | 0 | 0.452316615 | 0.00099476  | 2.832660928 | 1.398680042 | 1.027664994 | 0.76006718  | 2.701618271 | 4.598213085 | 3.140376942 | 1.706768167 |
| TCGA-CJ-4907-01A-01R-1426-07 | 0   | 3     | 1     | 1 | 2 | 0.313447316 | 0           | 2.540566054 | 1.296334715 | 0.521932354 | 0.702729728 | 2.755268175 | 4.557640846 | 2.379969509 | 1.083487871 |
| TCGA-B2-5635-01A-01R-A277-07 | 1   | 2     | 1     | 1 | 0 | 0           | 0.028037144 | 1.521759206 | 2.065521397 | 0.991748208 | 0.688908263 | 2.46337974  | 5.07251543  | 2.196885234 | 1.668864302 |
| TCGA-BP-5182-01A-01R-1426-07 | 0   | 3     | 1     | 1 | 0 | 0           | 0.002915758 | 1.151785301 | 0.214135977 | 0.332246848 | 0.128993428 | 2.529344188 | 4.37165686  | 2.935149893 | 0.211792875 |
| TCGA-DV-5576-01A-01R-1541-07 | 0   | 2     | 1     | 1 | 0 | 0.191779535 | 3.057082851 | 3.669626322 | 1.711383492 | 1.068636834 | 0.249594272 | 3.325178096 | 4.873254782 | 3.360847648 | 1.522719244 |
| TCGA-BP-4776-01A-01R-1289-07 | 0   | 2     | 1     | 1 | 0 | 2.221334608 | 0.011830624 | 2.453075246 | 2.909281129 | 1.513441117 | 0.615489174 | 4.081222001 | 4.022962159 | 4.121500115 | 4.410940447 |

|                              |   |   |   |   |   |             |             |             |             |             |             |             |             |             |             |
|------------------------------|---|---|---|---|---|-------------|-------------|-------------|-------------|-------------|-------------|-------------|-------------|-------------|-------------|
| TCGA-B0-4817-01A-01R-1277-07 | 1 | 3 | 1 | 1 | 2 | 1.156776115 | 0.060197827 | 3.405750898 | 0.628990834 | 0.592354292 | 1.045149546 | 3.794793508 | 3.592975639 | 2.559830443 | 0           |
| TCGA-B0-5691-01A-11R-1541-07 | 1 | 3 | 1 | 1 | 0 | 0           | 3.062984332 | 1.528468384 | 1.346312615 | 0.660658354 | 0.288451212 | 3.074822307 | 4.808230859 | 2.742764568 | 0.686869226 |
| TCGA-BP-4760-01A-02R-1420-07 | 1 | 2 | 1 | 1 | 0 | 0           | 0.00588699  | 1.222535254 | 0.661851209 | 0.554537904 | 0.040338753 | 3.024115857 | 4.921743925 | 3.379207547 | 0.253086894 |
| TCGA-B2-3924-01B-03R-A277-07 | 1 | 2 | 1 | 1 | 0 | 1.097213651 | 0.015313894 | 2.033396024 | 2.184227652 | 3.823327066 | 2.79081453  | 3.072296226 | 4.511198259 | 3.693542127 | 3.955402839 |
| TCGA-CW-6090-01A-11R-1672-07 | 1 | 3 | 1 | 1 | 0 | 0.168283241 | 0           | 0.324165337 | 1.652825431 | 0.495445675 | 0.070944209 | 3.126049389 | 4.105988676 | 2.305816289 | 0.217875847 |
| TCGA-B0-5106-01A-01R-1420-07 | 0 | 2 | 1 | 1 | 0 | 1.194474761 | 0.015585828 | 3.660425916 | 1.74951743  | 1.779557553 | 1.504591441 | 3.504751716 | 4.513801753 | 2.192403498 | 2.204178876 |
| TCGA-CW-5591-01A-01R-1541-07 | 0 | 2 | 1 | 2 | 2 | 0           | 0           | 0           | 0.884364853 | 0.392099127 | 0.032067906 | 2.134041237 | 5.219441694 | 3.04480513  | 0.503857221 |
| TCGA-BP-5190-01A-01R-1426-07 | 0 | 3 | 1 | 1 | 0 | 0           | 0.003541026 | 1.47564669  | 1.969182875 | 0.899056922 | 0.490969565 | 2.063121368 | 3.658786395 | 2.700555056 | 0.253478099 |
| TCGA-CJ-5675-01A-11R-1541-07 | 1 | 3 | 1 | 1 | 1 | 0           | 0           | 0.893478033 | 0.642984286 | 0.363431422 | 0.063173038 | 2.337147437 | 4.191249777 | 1.801340786 | 0           |
| TCGA-CJ-4640-01A-02R-1325-07 | 0 | 4 | 1 | 1 | 2 | 0           | 0.018330484 | 1.109978636 | 0.649725057 | 0.46094429  | 0.141803605 | 2.671416576 | 4.706583405 | 2.615016021 | 0.459205386 |
| TCGA-B0-4690-01A-01R-1277-07 | 0 | 3 | 1 | 2 | 3 | 0.365625446 | 0.012804219 | 0.911540759 | 1.807278267 | 1.532902412 | 0.548318233 | 2.001355464 | 4.749818674 | 2.648192309 | 0.250999292 |
| TCGA-BP-4765-01A-01R-1289-07 | 0 | 2 | 1 | 1 | 0 | 1.263292048 | 0.007206836 | 3.09057134  | 2.294025257 | 1.311744508 | 0.700136823 | 2.914011683 | 4.47524501  | 4.156459067 | 2.670853963 |
| TCGA-CZ-4861-01A-01R-1305-07 | 0 | 2 | 1 | 1 | 1 | 0.18156754  | 0.02265413  | 2.270083419 | 1.383710193 | 0.974117005 | 0.388275838 | 3.46412585  | 4.262608165 | 1.984737502 | 0.436624234 |
| TCGA-CZ-5468-01A-01R-1503-07 | 1 | 4 | 1 | 2 | 2 | 0.625284222 | 0.002197426 | 2.509751062 | 1.961034886 | 0.305787164 | 0.285247041 | 2.628696003 | 4.493134653 | 2.532831913 | 0.921096256 |
| TCGA-B0-4848-01A-01R-1277-07 | 0 | 3 | 1 | 1 | 2 | 0           | 0.073960556 | 1.372123032 | 0           | 0.463505958 | 0.101034098 | 1.694651527 | 4.390187144 | 2.480025901 | 0.598298851 |
| TCGA-CZ-5458-01A-01R-1503-07 | 0 | 3 | 1 | 1 | 2 | 0.327750176 | 0.001033501 | 1.846762064 | 0.594652956 | 0.474157905 | 0.180498532 | 2.718467794 | 4.457792939 | 1.959450688 | 0.588908157 |
| TCGA-B0-5080-01A-01R-1503-07 | 0 | 3 | 1 | 2 | 2 | 0           | 0.003680425 | 0.69340529  | 0.854475947 | 0.35006731  | 0.324562023 | 2.519459576 | 4.8743529   | 3.070315748 | 1.136120598 |
| TCGA-CZ-5985-01A-11R-1672-07 | 0 | 2 | 1 | 1 | 1 | 0.33669118  | 0           | 0.739062021 | 1.036628265 | 0.398235237 | 0.263285153 | 2.036757893 | 3.875924427 | 1.782486306 | 0           |
| TCGA-BP-4758-01A-01R-1289-07 | 0 | 2 | 1 | 1 | 0 | 0.462534235 | 0.044255057 | 2.865046386 | 2.511848753 | 0.764682245 | 0.372476825 | 3.418712799 | 3.890982574 | 3.003994059 | 1.659047133 |
| TCGA-B2-4099-01A-02R-1188-07 | 1 | 3 | 1 | 1 | 0 | 0.868000586 | 0           | 2.067814097 | 3.121219248 | 0.784928829 | 0.503865243 | 2.615918938 | 4.745853828 | 3.691722725 | 2.686200618 |
| TCGA-BP-4981-01A-01R-1334-07 | 1 | 3 | 1 | 1 | 2 | 1.416512174 | 0.84452771  | 2.608629334 | 2.499289149 | 1.212833494 | 1.268203691 | 3.399047115 | 3.554553492 | 3.055666983 | 2.137337245 |
| TCGA-B0-5705-01A-11R-1541-07 | 0 | 2 | 1 | 1 | 0 | 0.445895804 | 2.393621444 | 1.156492346 | 0.975086512 | 0.35013321  | 0.195859165 | 2.442085657 | 4.386715511 | 2.35500436  | 0.966723703 |
| TCGA-A3-3317-01A-02R-1325-07 | 1 | 2 | 1 | 1 | 1 | 1.640225841 | 0.003673285 | 1.585763232 | 2.495070482 | 2.056542943 | 0.983831665 | 2.207087238 | 4.538444684 | 3.696920623 | 2.80277735  |
| TCGA-BP-4971-01A-01R-1334-07 | 0 | 3 | 1 | 1 | 2 | 2.097661534 | 0.0068779   | 2.964079774 | 2.510328897 | 2.734654826 | 2.166153715 | 2.773404452 | 4.516199142 | 3.139941046 | 2.227054814 |
| TCGA-CJ-4895-01A-01R-1305-07 | 0 | 4 | 1 | 2 | 2 | 0.991849889 | 0.009321497 | 1.421075484 | 2.027175101 | 1.311233693 | 0.289053284 | 1.353135052 | 4.393023033 | 2.7820093   | 1.45263174  |
| TCGA-BP-4330-01A-01R-1289-07 | 0 | 2 | 1 | 1 | 2 | 0.948895612 | 4.316219755 | 3.820385136 | 2.393205136 | 1.709439634 | 1.015619649 | 3.500282175 | 4.29042405  | 2.621728591 | 1.36524321  |
| TCGA-DV-5573-01A-01R-1541-07 | 0 | 2 | 1 | 1 | 0 | 0.223219143 | 0.076612038 | 1.830120624 | 2.507259657 | 1.022933168 | 0.622418353 | 2.555427057 | 4.557507492 | 3.010965717 | 1.4667117   |
| TCGA-CJ-4874-01A-01R-1305-07 | 1 | 3 | 1 | 1 | 0 | 0           | 1.24902199  | 0.921540306 | 0.475393816 | 0.28059879  | 0.06222236  | 2.826386899 | 4.596019199 | 1.923834264 | 0.47062114  |
| TCGA-CJ-4881-01A-01R-1305-07 | 0 | 3 | 1 | 1 | 2 | 1.093173017 | 0.101368341 | 3.985281373 | 3.022261414 | 1.223660105 | 0.611385633 | 2.56172394  | 4.320197108 | 2.880647518 | 2.141961325 |
| TCGA-A3-3319-01A-02R-1325-07 | 1 | 2 | 1 | 1 | 0 | 0.974497516 | 0.000977539 | 0.576522796 | 1.550858016 | 1.001341697 | 0.348774216 | 1.306700897 | 4.482213286 | 2.40299052  | 0.843718763 |
| TCGA-B0-4694-01A-01R-1277-07 | 1 | 4 | 1 | 1 | 2 | 0.188850764 | 0.023615792 | 1.648913011 | 1.083276594 | 0.338477806 | 0.165283477 | 1.717730574 | 4.336641985 | 2.310496842 | 0.796697417 |
| TCGA-BP-4985-01A-01R-1334-07 | 1 | 4 | 1 | 1 | 2 | 0.160443754 | 0.005710527 | 0.969496276 | 0.210190763 | 0.199138483 | 0.13204505  | 0.75297463  | 4.255263309 | 2.649042763 | 0.948582679 |
| TCGA-B0-4696-01A-01R-1277-07 | 0 | 3 | 1 | 1 | 2 | 1.14954938  | 0.364651538 | 0.696260721 | 1.23500939  | 1.754400894 | 0.431801109 | 2.697297349 | 4.676164408 | 3.499960743 | 0.34207712  |
| TCGA-AK-3447-01A-01R-1766-07 | 1 | 2 | 1 | 1 | 1 | 0           | 0.00313833  | 0           | 0.600944524 | 0.074584236 | 0.029407916 | 4.388786231 | 4.314522524 | 3.847459769 | 0           |
| TCGA-A3-3376-01A-02R-1420-07 | 0 | 2 | 1 | 1 | 0 | 0.923606159 | 0.015268437 | 1.498921875 | 2.111588714 | 0.817804429 | 0.480663541 | 3.123281006 | 5.218212342 | 2.652799216 | 2.674336161 |
| TCGA-B8-5550-01A-01R-1541-07 | 1 | 3 | 1 | 1 | 2 | 0           | 0.004787694 | 1.002756061 | 1.036767425 | 0.325673768 | 0.116130523 | 2.641596271 | 4.306497426 | 2.898520747 | 0           |
| TCGA-MM-A84U-01A-11R-A37O-07 | 0 | 2 | 1 | 3 | 0 | 0.487097311 | 0.59997913  | 2.875450832 | 2.326600583 | 0.998277942 | 0.623550466 | 3.163672833 | 3.898042345 | 2.870245227 | 2.234002208 |
| TCGA-EU-5904-01A-11R-1672-07 | 0 | 0 | 1 | 1 | 0 | 0.193897005 | 2.84783604  | 1.803186019 | 0.468424999 | 0.394158282 | 0.24920671  | 3.256707417 | 4.330726326 | 2.735508225 | 0.961781181 |
| TCGA-CJ-4899-01A-01R-1334-07 | 0 | 2 | 1 | 1 | 0 | 0.153845163 | 0.004554271 | 2.111941066 | 1.632534992 | 0.813823821 | 0.674449284 | 3.255242971 | 4.665149795 | 3.399413068 | 2.140890703 |
| TCGA-B0-5102-01A-01R-1420-07 | 1 | 3 | 1 | 1 | 0 | 0.736980449 | 3.327357583 | 2.773516618 | 2.130227377 | 1.366616069 | 0.876629198 | 2.600774505 | 4.037361957 | 2.447872557 | 1.930189577 |
| TCGA-BP-4158-01A-02R-1289-07 | 1 | 2 | 1 | 1 | 0 | 1.23017343  | 0.02969941  | 2.770681265 | 3.500670079 | 1.070507555 | 0.636267901 | 4.159825055 | 4.324928568 | 2.375793075 | 2.608521259 |
| TCGA-CJ-4893-01A-01R-1305-07 | 1 | 3 | 1 | 1 | 0 | 0.454979252 | 2.463142712 | 1.591371095 | 1.10667339  | 0.397761235 | 0.230130058 | 2.090501398 | 4.29321846  | 2.171364883 | 0.573893044 |
| TCGA-CJ-4904-01A-02R-1426-07 | 0 | 3 | 1 | 2 | 2 | 0           | 2.163520944 | 0.811388504 | 0.770713695 | 0.370484621 | 0.042669443 | 2.81876429  | 4.580475687 | 3.303226661 | 0           |
| TCGA-BP-4759-01A-01R-1289-07 | 0 | 2 | 1 | 1 | 0 | 0           | 0.032024534 | 1.758772724 | 1.071690962 | 0.321513333 | 0.095334387 | 3.79022332  | 3.851620168 | 1.523743956 | 1.062765564 |
| TCGA-BP-5178-01A-01R-1426-07 | 1 | 4 | 1 | 2 | 2 | 0.45285216  | 0.000996131 | 0.701102424 | 0.987914644 | 0.167882245 | 0.085372381 | 1.897151379 | 3.996905937 | 2.66209925  | 0.216557859 |
| TCGA-B0-4839-01A-01R-1305-07 | 1 | 2 | 1 | 1 | 0 | 0.204097449 | 0.290284781 | 1.731585962 | 0.490817783 | 0.494856541 | 0.185588538 | 3.311393329 | 4.070625323 | 1.703628226 | 0           |
| TCGA-B0-5707-01A-11R-1541-07 | 0 | 3 | 1 | 1 | 0 | 0           | 2.386758209 | 0.463068468 | 2.077757577 | 0.539211128 | 0.144499162 | 1.375915388 | 5.293813185 | 2.780250469 | 0.316021424 |
| TCGA-CJ-6028-01A-11R-1672-07 | 0 | 4 | 1 | 2 | 2 | 0.24444596  | 0.010440219 | 0.248528516 | 0.577602676 | 0.645761027 | 0.139319881 | 2.406662697 | 4.370439501 | 2.535889893 | 0           |
| TCGA-AK-3429-01A-02R-1325-07 | 0 | 2 | 1 | 1 | 1 | 0           | 1.37052591  | 1.411818109 | 0.346922263 | 0.411046965 | 0.081043062 | 2.987673808 | 4.004610054 | 2.204623129 | 0           |
| TCGA-B8-5545-01A-01R-1672-07 | 0 | 2 | 1 | 1 | 0 | 0           | 0           | 0.808684665 | 0.669529033 | 0.347551452 | 0.048231668 | 2.622143457 | 5.109047476 | 2.393123889 | 1.115840229 |
| TCGA-CZ-4864-01A-01R-1503-07 | 1 | 3 | 1 | 1 | 1 | 0.661971017 | 0.003771289 | 3.390291389 | 2.786609019 | 1.247408608 | 0.877699121 | 2.754500707 | 4.699120213 | 2.72807753  | 2.273800125 |
| TCGA-BP-4999-01A-01R-1334-07 | 0 | 2 | 1 | 1 | 0 | 0.494765274 | 0.002485255 | 2.368850759 | 1.844350576 | 1.427398503 | 0.520826485 | 3.169249137 | 4.772724534 | 4.173119978 | 2.445479084 |
| TCGA-B0-5119-01A-02R-1420-07 | 0 | 2 | 1 | 1 | 0 | 0.375571978 | 3.12401375  | 2.509134294 | 0.842330016 | 0.453446911 | 0.181815044 | 2.690085549 | 4.56451069  | 2.425479954 | 0.258101203 |
| TCGA-CJ-4637-01A-02R-1325-07 | 0 | 4 | 1 | 2 | 1 | 0.604940773 | 4.186130684 | 1.936867221 | 2.084491928 | 1.633828691 | 0.860014016 | 2.712490675 | 4.554273714 | 3.487840314 | 1.100286792 |
| TCGA-CZ-5463-01A-01R-1503-07 | 1 | 2 | 1 | 1 | 1 | 0.444213183 | 0.001460849 | 1.006909287 | 1.42366895  | 1.884033433 | 0.398072068 | 3.563560548 | 4.306346515 | 2.275289576 | 0.672545826 |
| TCGA-B0-5120-01A-01R-1420-07 | 1 | 2 | 1 | 1 | 0 | 0.378126887 | 3.655756605 | 2.018283809 | 2.534672683 | 0.621263102 | 0.258685768 | 3.051640465 | 4.325549648 | 4.168553756 | 1.127311112 |
| TCGA-B4-5836-01A-11R-1672-07 | 0 | 2 | 1 | 1 | 0 | 0           | 2.797372416 | 0.360282701 | 0.245789118 | 0.281250048 | 0.106339945 | 2.110346    |             |             |             |

|                              |   |   |   |   |   |             |             |             |             |             |             |             |             |             |             |
|------------------------------|---|---|---|---|---|-------------|-------------|-------------|-------------|-------------|-------------|-------------|-------------|-------------|-------------|
| TCGA-A3-3313-01A-02R-1325-07 | 0 | 3 | 1 | 1 | 0 | 0.987779147 | 0.007948359 | 0           | 1.99863069  | 1.318135834 | 0.874520062 | 3.010695444 | 4.889012013 | 3.390607882 | 1.198756996 |
| TCGA-B0-5081-01A-01R-1334-07 | 1 | 2 | 1 | 1 | 2 | 1.04987197  | 4.005470142 | 1.612835707 | 1.687050435 | 1.217283824 | 0.893265366 | 2.550633332 | 4.254249835 | 2.590441138 | 1.602720761 |
| TCGA-B0-4713-01A-01R-1277-07 | 1 | 2 | 1 | 1 | 2 | 0.502127999 | 2.675524335 | 2.389209401 | 1.255603638 | 1.047291173 | 1.190977496 | 3.568643516 | 3.461854276 | 2.626742446 | 1.245705431 |
| TCGA-B0-4836-01A-01R-1305-07 | 0 | 3 | 1 | 2 | 2 | 0           | 0.008864138 | 1.922855771 | 0.98177187  | 1.06708596  | 0.240396651 | 2.128832306 | 4.165551808 | 2.241774467 | 0           |
| TCGA-BP-4994-01A-01R-1334-07 | 0 | 3 | 1 | 1 | 0 | 0.13477323  | 0.006336825 | 0.997838605 | 1.031735634 | 0.880811313 | 0.890143229 | 2.413119725 | 5.78789405  | 4.237612391 | 0.82712455  |
| TCGA-BP-5168-01A-01R-1420-07 | 1 | 2 | 1 | 1 | 0 | 0           | 0.011355485 | 1.654287811 | 0.768170568 | 0.376244431 | 0.048583798 | 3.602430183 | 4.094591834 | 2.222116015 | 0.300548177 |
| TCGA-B8-5553-01A-01R-1541-07 | 1 | 2 | 1 | 1 | 0 | 0           | 2.116423967 | 1.723562085 | 1.141482266 | 0.452683535 | 0.132425601 | 2.730904226 | 4.501866417 | 3.021358902 | 0.482637163 |
| TCGA-B4-5844-01A-11R-1672-07 | 0 | 0 | 1 | 1 | 1 | 0           | 2.898008565 | 0.847098802 | 0.702827096 | 0.571394559 | 0.144861451 | 2.590683851 | 4.51153514  | 2.872134848 | 0.499310449 |
| TCGA-B0-4688-01A-01R-1277-07 | 0 | 4 | 1 | 2 | 3 | 0.925948109 | 0.037210968 | 0.818506227 | 1.847918673 | 2.008471766 | 0.802313012 | 1.873351619 | 5.40474421  | 3.126893745 | 0.840385786 |
| TCGA-BP-4803-01A-01R-1305-07 | 1 | 3 | 1 | 1 | 2 | 0           | 0.004551218 | 0.363170445 | 1.209126784 | 1.105664292 | 0.107269123 | 2.728390016 | 4.411341133 | 2.018913316 | 0.945683443 |
| TCGA-BP-5007-01A-01R-1334-07 | 0 | 2 | 1 | 1 | 1 | 0.32075337  | 0.011059347 | 3.126318945 | 2.410259218 | 0.875913141 | 0.94737362  | 3.200965534 | 4.483824715 | 2.977851994 | 2.717475752 |
| TCGA-G6-A8L6-01A-11R-A37O-07 | 0 | 3 | 1 | 2 | 1 | 1.481941    | 0.016519834 | 2.960088764 | 3.253876081 | 0.776662809 | 0.507927776 | 5.200227897 | 3.914595981 | 2.918922822 | 4.498461631 |
| TCGA-CJ-4902-01A-01R-1426-07 | 0 | 3 | 1 | 1 | 2 | 1.12369286  | 0.003471657 | 1.398905554 | 2.652559225 | 1.039275831 | 0.90415806  | 2.465414823 | 4.394683715 | 3.104079456 | 2.134083945 |
| TCGA-CJ-4889-01A-01R-1305-07 | 0 | 4 | 1 | 1 | 0 | 0.367327    | 2.323154565 | 1.616653295 | 1.812700232 | 1.252112635 | 0.241634837 | 2.616138408 | 4.93331862  | 3.555363974 | 1.338146501 |
| TCGA-B0-5693-01A-11R-1541-07 | 0 | 2 | 1 | 1 | 0 | 0.875919544 | 4.526547416 | 1.757456372 | 0.531496703 | 0.812102015 | 0.3030369   | 2.516841961 | 4.258457687 | 2.851020849 | 2.029033495 |
| TCGA-DV-5567-01A-01R-1541-07 | 0 | 2 | 1 | 1 | 0 | 0           | 2.357826876 | 2.401260811 | 1.264270276 | 0.51101124  | 0.084791955 | 3.638307082 | 5.10685079  | 2.602452718 | 0.899930638 |
| TCGA-B0-5812-01A-11R-1672-07 | 0 | 3 | 1 | 1 | 0 | 0.342964449 | 0.002173973 | 0.184749638 | 0.921842888 | 0.717080322 | 0.137271825 | 3.083684383 | 4.523128077 | 2.754362589 | 0.913806534 |
| TCGA-CJ-4876-01A-01R-1305-07 | 0 | 3 | 1 | 1 | 1 | 1.400301001 | 0.022421378 | 2.4169423   | 1.941825686 | 1.292468898 | 0.663336091 | 2.563384187 | 4.180752145 | 3.591092378 | 1.056711821 |
| TCGA-BP-5010-01A-02R-1420-07 | 0 | 4 | 1 | 1 | 2 | 1.772986453 | 0.004515929 | 3.034803637 | 2.797227249 | 0.522538536 | 0.428550653 | 2.325479763 | 4.047822572 | 3.744408925 | 1.304659999 |
| TCGA-B0-5121-01A-02R-1420-07 | 0 | 2 | 1 | 1 | 0 | 0.171959627 | 0.004099188 | 1.194649992 | 1.332881137 | 0.92316851  | 0.393873789 | 2.847944458 | 3.93096702  | 2.104312684 | 1.223041463 |
| TCGA-B8-4621-01A-01R-1503-07 | 0 | 3 | 1 | 1 | 0 | 0.768161899 | 0           | 1.351106988 | 1.988644053 | 0.860713713 | 0.356387693 | 1.576044831 | 4.834563061 | 2.976350289 | 0.693876131 |
| TCGA-B8-A8YJ-01A-13R-A39I-07 | 0 | 2 | 1 | 1 | 0 | 1.104362402 | 3.225563671 | 1.900031074 | 2.418079109 | 1.872517748 | 0.43263663  | 2.383874548 | 5.042666321 | 4.843367544 | 3.370809504 |
| TCGA-CW-5589-01A-01R-1541-07 | 0 | 2 | 1 | 1 | 0 | 0.2040582   | 0.077920395 | 1.662548108 | 0.856240963 | 0.405883121 | 0.057094467 | 3.755836224 | 4.291943127 | 2.341685254 | 1.000705075 |
| TCGA-B2-5633-01B-04R-A277-07 | 0 | 2 | 1 | 1 | 0 | 1.54508067  | 0.178243446 | 2.507767423 | 2.935417009 | 4.126210098 | 2.822761049 | 2.758152896 | 4.488937427 | 3.457657352 | 3.65839112  |
| TCGA-B0-4822-01A-01R-1277-07 | 1 | 4 | 1 | 1 | 1 | 3.076824132 | 0.014592708 | 2.612763415 | 3.133000326 | 1.413089117 | 0.757668574 | 3.055940642 | 3.85021919  | 3.28370832  | 4.766690434 |
| TCGA-CJ-5683-01A-11R-1541-07 | 1 | 3 | 1 | 1 | 0 | 0.586661473 | 0.282346453 | 0.226874517 | 1.477191449 | 0.97215391  | 0.206713603 | 3.510820929 | 4.241447935 | 2.521744646 | 1.346355065 |
| TCGA-CZ-5453-01A-01R-1503-07 | 1 | 2 | 1 | 1 | 1 | 0           | 0.001003817 | 1.3296304   | 0.580582273 | 0.949415387 | 0.206118243 | 3.244894969 | 4.131787891 | 2.822158906 | 0.574948064 |
| TCGA-B0-5088-01A-01R-1334-07 | 0 | 3 | 1 | 1 | 0 | 1.195602736 | 0.010423646 | 2.761501125 | 1.532363856 | 0.960223261 | 0.994215896 | 2.846687649 | 3.824289249 | 3.384468947 | 2.245086839 |
| TCGA-A3-3357-01A-02R-1420-07 | 0 | 3 | 1 | 1 | 1 | 1.413480914 | 0.004809281 | 1.062831042 | 1.45576471  | 1.535189799 | 0.60002327  | 2.410418088 | 3.74022403  | 2.592781291 | 1.171678753 |
| TCGA-CZ-4856-01A-02R-1426-07 | 0 | 2 | 1 | 1 | 0 | 0.152129637 | 1.3080524   | 0.930430335 | 0.374684743 | 0.231442459 | 0.016951377 | 2.697476959 | 4.099521683 | 2.330394926 | 0.910120088 |
| TCGA-BP-4176-01A-02R-1289-07 | 0 | 2 | 1 | 1 | 0 | 0.195488223 | 0.038308994 | 1.617533623 | 1.349284425 | 0.971740344 | 0.467786903 | 2.56073048  | 4.297642229 | 2.986114054 | 0.467187416 |
| TCGA-BP-4801-01A-02R-1420-07 | 0 | 2 | 1 | 1 | 0 | 0           | 0.01046695  | 1.119522927 | 0.970736573 | 0.298626589 | 0.06122944  | 2.617381476 | 4.386714279 | 2.598053298 | 0           |
| TCGA-CJ-4892-01A-01R-1305-07 | 0 | 2 | 1 | 1 | 0 | 0.911737782 | 3.040697332 | 2.864203675 | 1.977353501 | 1.607584936 | 0.813213694 | 2.91433517  | 4.374393255 | 2.32822633  | 1.553570095 |
| TCGA-B0-5700-01A-11R-1541-07 | 1 | 2 | 1 | 1 | 0 | 0.854956787 | 0.135982935 | 2.031317948 | 1.055385018 | 0.233038857 | 0.055741044 | 3.372192064 | 3.616156164 | 3.549375543 | 1.377612885 |
| TCGA-BP-4775-01A-01R-1289-07 | 0 | 2 | 1 | 1 | 0 | 1.721440439 | 4.304943953 | 3.489929284 | 3.015147131 | 1.506690608 | 1.080060423 | 2.815792832 | 4.080172981 | 4.427012653 | 1.329840675 |
| TCGA-CW-5581-01A-02R-1541-07 | 0 | 3 | 1 | 1 | 0 | 0.741028813 | 0.001088153 | 1.791133214 | 0.620205243 | 0.254097753 | 0.109009083 | 2.094496772 | 4.037608884 | 1.933713199 | 0.614262327 |
| TCGA-BP-4164-01A-02R-1325-07 | 0 | 2 | 1 | 1 | 2 | 0.548110951 | 4.081125468 | 2.87828104  | 1.158629834 | 1.669035501 | 1.126275396 | 1.674476999 | 4.450059426 | 2.701313693 | 0.936187664 |
| TCGA-CJ-4642-01B-01R-1305-07 | 0 | 2 | 1 | 1 | 1 | 0           | 2.64850482  | 2.380352438 | 0           | 2.963713167 | 0.664898446 | 3.982136609 | 3.046098555 | 2.717824047 | 0           |
| TCGA-BP-4976-01A-01R-1334-07 | 1 | 3 | 1 | 1 | 0 | 0           | 0.011339441 | 1.505004428 | 1.139875215 | 0.221687842 | 0.099047597 | 3.35583597  | 4.73469191  | 2.100345296 | 0.48180159  |
| TCGA-CJ-4897-01A-03R-1426-07 | 1 | 3 | 1 | 1 | 2 | 0.258546795 | 1.737410289 | 1.377808802 | 1.206947858 | 0.333152135 | 0.187849182 | 3.165253004 | 4.310812906 | 2.174821858 | 0.175440727 |
| TCGA-BP-4160-01A-02R-1289-07 | 1 | 2 | 1 | 1 | 2 | 0.32539169  | 0.012254549 | 1.194101761 | 0           | 0.546172391 | 0.111921992 | 2.787031526 | 4.733207814 | 3.244031925 | 0.415077978 |
| TCGA-B8-5159-01A-01R-1420-07 | 0 | 3 | 1 | 1 | 0 | 0.298049584 | 2.301930715 | 1.398117499 | 0.205376766 | 0.365136571 | 0.147590456 | 3.138357441 | 4.203536776 | 1.610170893 | 0.381145051 |
| TCGA-CJ-4885-01A-01R-1305-07 | 0 | 3 | 1 | 2 | 2 | 0           | 0.038138888 | 2.203417147 | 0.240748128 | 0.468440668 | 0.116951346 | 2.918071791 | 4.136175303 | 1.796038364 | 0           |
| TCGA-BP-5201-01A-01R-1426-07 | 0 | 4 | 1 | 2 | 2 | 0.937977022 | 0.018967039 | 1.301788894 | 1.151287273 | 1.485762986 | 0.445225798 | 2.345985867 | 3.801150408 | 3.768882782 | 1.534224679 |
| TCGA-BP-4991-01A-01R-1334-07 | 0 | 2 | 1 | 1 | 0 | 0.804677975 | 0.00259224  | 2.090369402 | 2.316927102 | 1.712413489 | 0.707546081 | 2.768328463 | 4.62361426  | 3.586377194 | 2.081685116 |
| TCGA-BP-4968-01A-01R-1334-07 | 0 | 3 | 1 | 1 | 0 | 0.862207701 | 0.002838677 | 2.694199428 | 1.867173874 | 1.698763554 | 0.634631576 | 1.979023774 | 4.182919473 | 3.14184344  | 1.509597731 |
| TCGA-BP-4975-01A-01R-1334-07 | 0 | 3 | 1 | 1 | 0 | 0.245965541 | 0.001506204 | 0.888847773 | 1.080873911 | 1.303824172 | 0.230034106 | 3.701814801 | 4.277904972 | 2.059668436 | 1.230896544 |
| TCGA-BP-4340-01A-01R-1289-07 | 1 | 2 | 1 | 1 | 0 | 2.482020319 | 1.472482245 | 2.79335538  | 2.263535089 | 1.252203499 | 1.547727531 | 3.109493976 | 3.969599208 | 2.931803184 | 0.861341025 |
| TCGA-B0-5084-01A-01R-1334-07 | 0 | 3 | 1 | 2 | 2 | 0.177638624 | 1.201841781 | 1.137976602 | 2.720423182 | 1.300629013 | 2.210287279 | 4.288813721 | 4.512418261 | 1.941381898 | 1.025678471 |
| TCGA-CW-5590-01A-01R-1541-07 | 0 | 3 | 1 | 2 | 2 | 0.974035364 | 0.004460448 | 2.079331441 | 2.166698276 | 0.835180967 | 0.312174314 | 2.101585332 | 4.635640266 | 2.668658978 | 1.397082236 |
| TCGA-BP-5198-01A-01R-1426-07 | 1 | 3 | 1 | 1 | 2 | 0.181895677 | 0.003264425 | 1.157916486 | 0.779603004 | 0.259559819 | 0.053921452 | 1.222513375 | 4.697449465 | 3.09253789  | 0           |
| TCGA-A3-3308-01A-02R-1325-07 | 1 | 2 | 1 | 1 | 2 | 0.93247729  | 3.766980855 | 0.636953271 | 2.285840653 | 0.95476395  | 0.536660807 | 2.718789971 | 4.445188058 | 2.730431727 | 2.533213243 |
| TCGA-B0-5706-01A-11R-1541-07 | 0 | 2 | 1 | 1 | 1 | 0           | 0.003603007 | 1.491749017 | 0.672028396 | 0.231514256 | 0.140734929 | 2.184058897 | 3.987422638 | 2.760210747 | 0           |
| TCGA-CZ-5466-01A-01R-1503-07 | 1 | 2 | 1 | 1 | 2 | 0.451446413 | 0.007427396 | 1.85544554  | 0.316076603 | 0.597038272 | 0.064270171 | 2.558657276 | 3.973837158 | 2.632807072 | 0.569605191 |
| TCGA-AK-3434-01A-02R-1277-07 | 1 | 2 | 1 | 1 | 0 | 0.517865997 | 0.176100462 | 1.67736684  | 1.286557374 | 0.986348153 | 0.372386542 | 3.466907837 | 4.511728837 | 2.220523438 | 0           |
| TCGA-BP-4335-01A-01R-1289-07 | 0 | 3 | 1 | 2 | 2 | 0.594702026 | 4.012269323 | 2.041459496 | 1.895634858 | 1.279096794 | 1.449162986 | 3.069880142 | 4.121271707 | 2.668546406 | 3.010461654 |
| TCGA-B0-5699-01A-11R-1541-07 | 0 | 2 | 1 | 1 | 0 | 0.364597072 | 0.002329077 | 1.300854882 |             |             |             |             |             |             |             |

|                              |   |   |   |   |   |             |             |             |             |             |             |             |             |             |             |
|------------------------------|---|---|---|---|---|-------------|-------------|-------------|-------------|-------------|-------------|-------------|-------------|-------------|-------------|
| TCGA-BP-4344-01A-01R-1289-07 | 1 | 2 | 1 | 1 | 0 | 0.713101778 | 3.402369845 | 2.743257149 | 2.886208428 | 0.776315443 | 0.428029996 | 3.294625219 | 4.796162281 | 3.735494339 | 4.256384    |
| TCGA-G6-A8L7-01A-11R-A37O-07 | 1 | 3 | 1 | 3 | 0 | 0.393687716 | 1.006100032 | 3.680292125 | 3.350957124 | 0.586066351 | 0.328425433 | 2.84373514  | 2.780135881 | 1.908331249 | 3.50273828  |
| TCGA-BP-4782-01A-02R-1420-07 | 0 | 2 | 1 | 1 | 0 | 0           | 2.563890811 | 1.029880959 | 0.474887646 | 0.596242968 | 0.083456362 | 2.338610011 | 4.17431464  | 2.901079953 | 0.254124746 |
| TCGA-G6-A8L8-01A-21R-A37O-07 | 0 | 3 | 1 | 3 | 0 | 1.102199924 | 3.837963124 | 5.387790745 | 3.484645787 | 1.897351458 | 2.09440775  | 3.926396063 | 3.894563479 | 3.230814663 | 4.453094111 |
| TCGA-BP-4756-01A-01R-1289-07 | 0 | 2 | 1 | 1 | 0 | 0.357379008 | 3.022040668 | 1.100862536 | 2.55393479  | 1.000445249 | 0.845313076 | 1.814714028 | 4.536201825 | 2.561378034 | 1.199342752 |
| TCGA-AK-3436-01A-02R-1325-07 | 0 | 2 | 1 | 2 | 1 | 0.568514898 | 0.024588573 | 0.988089051 | 0.894262814 | 0.303425306 | 0.279630717 | 3.533882675 | 4.302150045 | 1.730704882 | 0           |
| TCGA-B0-5712-01A-11R-1672-07 | 1 | 3 | 1 | 2 | 1 | 0.36282406  | 2.540329815 | 0.368644963 | 0.465978851 | 0.32707265  | 0.348804076 | 2.912014752 | 4.41830843  | 2.02980125  | 0.249001606 |
| TCGA-CJ-4875-01A-01R-1305-07 | 1 | 3 | 1 | 2 | 2 | 1.160195672 | 0.061593962 | 3.643346622 | 3.961930142 | 2.532199699 | 1.207447107 | 3.02811952  | 4.321332492 | 2.399037591 | 2.717811324 |



| MALAT1      | MIR4645     | HOXA13      | TRG.AS1     | HOXA10      | NEAT1       | HOXA3       | MIR570      | SNHG1       | MIR4668     | HOXA9       | MIR4701     | SNHG5       | MIR4768     |
|-------------|-------------|-------------|-------------|-------------|-------------|-------------|-------------|-------------|-------------|-------------|-------------|-------------|-------------|
| 4.086426021 | 1.16447674  | 0.068835685 | 0.210886751 | 2.457412918 | 3.629246175 | 2.329766159 | 2.567467221 | 1.825858919 | 0           | 3.179601717 | 0           | 3.917460738 | 2.035779462 |
| 4.178425832 | 0           | 0.132242554 | 0.102840251 | 2.247780943 | 3.588971738 | 1.457771513 | 1.814213679 | 1.686130223 | 0.90446447  | 3.2483253   | 0.787884826 | 4.025442636 | 1.796667351 |
| 4.739927055 | 1.464770091 | 0.042615937 | 0.108277987 | 3.570118999 | 4.132151495 | 1.88100518  | 2.376235954 | 2.221141003 | 0           | 3.312139236 | 0.620902879 | 4.748120426 | 0.754316954 |
| 3.84509945  | 0.496100407 | 0.112062236 | 0.116585646 | 2.003302004 | 2.684315539 | 1.019644923 | 0.983557371 | 2.693469179 | 0           | 2.927722907 | 0           | 3.049294121 | 1.546784388 |
| 3.29034579  | 0.33459985  | 0.005690083 | 0.048328708 | 2.293898827 | 3.473791533 | 1.491118558 | 1.465328586 | 2.247477606 | 0           | 2.790547609 | 0.213523805 | 3.92807592  | 0.747623278 |
| 3.745247653 | 0           | 0.011508861 | 0.089648313 | 2.337659094 | 4.541666492 | 1.929652988 | 2.517129126 | 1.811754334 | 0.788610926 | 2.875954323 | 0.570404934 | 3.568237767 | 0.350764701 |
| 4.394545444 | 0.260123503 | 0.095991791 | 0.092622753 | 2.155625976 | 3.845935898 | 1.633303623 | 2.153981084 | 1.699568831 | 0           | 3.40234883  | 0.3120705   | 3.693901473 | 0.693117855 |
| 3.34782931  | 0.554900469 | 0.02034642  | 0.155346657 | 1.661292949 | 3.403867301 | 1.092452943 | 1.516903635 | 1.486984193 | 0.600245017 | 2.880004021 | 0.363622155 | 4.567595861 | 2.22052387  |
| 4.272535786 | 0.256441179 | 0.168248519 | 0.355313662 | 2.416747272 | 3.916261066 | 1.57665776  | 1.347209064 | 1.830363683 | 1.049565468 | 3.296749876 | 0           | 4.354769537 | 2.335795972 |
| 4.526248779 | 0.416091199 | 0.050228591 | 0.128943693 | 2.234091366 | 5.007769223 | 2.218968754 | 2.354271886 | 2.148476828 | 0.451792178 | 2.56677317  | 1.015422765 | 3.870040634 | 1.626281718 |
| 3.995749154 | 0           | 0.039587882 | 0.223413773 | 2.1938307   | 3.605684572 | 1.927524481 | 1.845283635 | 1.763080453 | 0.535242273 | 2.519435166 | 0.321405742 | 4.418226787 | 1.18568618  |
| 3.37715603  | 0.601852253 | 0.055454057 | 0.145566538 | 2.036377673 | 4.035307204 | 1.96251298  | 2.029264726 | 2.425540458 | 0.361448462 | 3.302014937 | 0.396543256 | 5.349090989 | 2.170318079 |
| 3.452638275 | 0           | 0.010466241 | 0.063271079 | 2.974436727 | 3.325699588 | 2.287304973 | 1.718348496 | 1.803681701 | 0           | 4.000438496 | 0           | 4.327451933 | 0           |
| 3.731545467 | 0.604960045 | 0.082907995 | 0.101438744 | 2.211113601 | 3.072166901 | 1.593011649 | 1.163872914 | 1.346636196 | 0           | 3.262208904 | 0           | 3.880179503 | 0.858445389 |
| 2.332304559 | 0.688499681 | 1.274879989 | 0.60836498  | 2.188122014 | 1.693314439 | 1.470800292 | 2.992562684 | 1.551340008 | 0.291905006 | 1.821408414 | 0.320973392 | 4.91669732  | 1.043112943 |
| 3.198173297 | 0           | 0.003961255 | 0.033795354 | 1.677739362 | 3.182218391 | 0.908306413 | 1.52313182  | 1.253986718 | 0           | 2.055828699 | 0           | 3.585684933 | 0           |
| 4.2624701   | 0.38449777  | 0.013279909 | 0.072100268 | 2.674156584 | 3.466336412 | 1.074441114 | 1.826017042 | 1.993983165 | 0.224006799 | 2.919927079 | 0.457618569 | 4.491339674 | 1.183420621 |
| 3.138763504 | 0.777047956 | 0.072200058 | 0.070242282 | 2.338507783 | 2.330036106 | 1.357957772 | 1.354918692 | 1.189091205 | 0           | 3.089216001 | 0           | 4.37060955  | 0.455518684 |
| 4.294828658 | 1.89229997  | 0.05235517  | 0.02889028  | 2.041062048 | 3.506954689 | 1.546280494 | 2.15213702  | 1.55335097  | 0.675091876 | 3.107485218 | 0           | 3.959151992 | 0           |
| 3.316815856 | 0.233866407 | 0.034185734 | 0.243349197 | 2.138550993 | 2.446314279 | 1.203404913 | 1.75482535  | 1.967699701 | 0           | 2.852563525 | 0           | 4.309419246 | 1.301549112 |
| 3.014488882 | 0.23456862  | 0.041807431 | 0.14877293  | 2.603887957 | 3.111563775 | 2.409439543 | 2.418110659 | 1.993653552 | 0.256057004 | 3.359468199 | 0           | 3.991722385 | 0.451461736 |
| 4.955727203 | 1.14450368  | 0.231592718 | 0.559756181 | 1.013281748 | 5.097685284 | 1.947767457 | 3.43975402  | 2.681891502 | 3.413504404 | 0.977814644 | 1.310191906 | 4.053705409 | 2.928628287 |
| 6.163650285 | 0.732347283 | 0.04736352  | 0.685521531 | 0.525652963 | 7.061506343 | 2.055739821 | 4.181848748 | 3.259661329 | 2.053940884 | 0.631512195 | 1.529093026 | 4.264523511 | 3.060095345 |
| 4.97951314  | 1.329092026 | 0.418918462 | 0.728237085 | 2.358657888 | 3.734137837 | 1.861960207 | 4.182011971 | 3.116323587 | 1.536729044 | 2.216313525 | 1.638130207 | 4.712121774 | 1.886696419 |
| 2.796189524 | 2.128270056 | 0.041483036 | 1.183201245 | 1.725226172 | 3.256095208 | 1.943687392 | 2.432268056 | 2.65150589  | 0.339065875 | 1.788767729 | 0           | 5.938044442 | 0.3226393   |
| 5.321728557 | 0.705121906 | 0.060656167 | 0.837797054 | 4.015563119 | 5.023347623 | 2.743590791 | 0.585277242 | 4.875871933 | 0.429380646 | 3.857865892 | 0.470065743 | 5.988818755 | 2.787121    |
| 3.719006435 | 0.643926054 | 0.132942555 | 0.236716551 | 2.169243259 | 4.073532681 | 1.888610617 | 3.312028148 | 2.915895029 | 0           | 2.186330665 | 0           | 5.578518113 | 0.257164655 |
| 4.882448571 | 3.085820244 | 0.168682928 | 0.752884452 | 2.633954318 | 5.106655058 | 3.196337968 | 4.631320907 | 3.2241627   | 1.193708723 | 3.24477208  | 1.441766806 | 5.612445936 | 2.612306662 |
| 3.018660551 | 1.95403184  | 0.099627249 | 0.696129959 | 1.767831347 | 2.263844044 | 1.824064376 | 2.247556798 | 1.971311067 | 0.293792046 | 1.864374855 | 0           | 4.143244383 | 0.513287796 |
| 3.793615212 | 2.216346806 | 0.03929032  | 0.680113464 | 2.790742402 | 3.584664778 | 1.671211146 | 1.291356554 | 3.561863395 | 1.587813117 | 2.592886477 | 0           | 6.240616693 | 0           |
| 5.204992041 | 1.271429626 | 0.373423712 | 0.954953334 | 2.501852818 | 5.521143911 | 2.185884413 | 4.632042935 | 3.511803491 | 0.951024006 | 2.606409916 | 1.773794848 | 5.711915661 | 2.179891541 |
| 5.862565997 | 1.65543979  | 0.205391653 | 1.255232473 | 0.65640428  | 5.105199052 | 2.529936787 | 4.228916893 | 3.247720943 | 1.274486368 | 0.512325099 | 0.609379117 | 3.743797051 | 1.966641103 |
| 6.241292439 | 2.427575779 | 0.011908803 | 1.348467839 | 1.521408589 | 6.929076902 | 1.837866915 | 3.64581198  | 5.478202171 | 2.004023859 | 3.08300073  | 2.226607612 | 6.123639622 | 4.464550948 |
| 6.323006994 | 1.995931551 | 2.213979906 | 0.454885179 | 1.071251412 | 5.842295314 | 1.450731183 | 4.103908995 | 3.084576961 | 1.000415979 | 1.376015463 | 1.280597294 | 5.003482005 | 3.029681324 |
| 5.59394842  | 1.089623942 | 0.067397479 | 0.982565505 | 2.416839541 | 5.324906444 | 1.829467664 | 4.035958467 | 2.971107956 | 0.994799306 | 2.393976754 | 1.072527577 | 5.066766407 | 2.018705129 |
| 12.32690828 | 0           | 0.043588239 | 0.30945359  | 0.913631857 | 9.425610076 | 0.83591934  | 8.362384011 | 3.196718868 | 2.94224795  | 1.547376726 | 0           | 2.349000601 | 1.636090177 |
| 3.716750488 | 1.082797551 | 0.956594419 | 0.304825864 | 1.975645692 | 3.732483069 | 1.932205517 | 2.508827853 | 3.037513821 | 0.767934828 | 1.911194041 | 0.2572891   | 5.3321548   | 0.872670846 |
| 4.686162105 | 0           | 0.086397379 | 0.510294474 | 2.295459968 | 5.353676185 | 1.297425463 | 2.901468946 | 3.488423525 | 0.458038955 | 2.188354598 | 0.500998391 | 6.186165581 | 3.536580506 |
| 4.539445189 | 1.723073734 | 0.218791082 | 0.471099518 | 2.689205909 | 4.152283764 | 2.166657127 | 1.830915517 | 3.787074895 | 0           | 2.930282142 | 0.643913516 | 6.38034004  | 0.309722186 |
| 3.035462971 | 0.289112217 | 0.042971606 | 0.271240249 | 1.907484718 | 3.159016554 | 1.484095639 | 0.769392639 | 2.222295438 | 0           | 1.929419993 | 0           | 4.321442933 | 0.299694344 |
| 5.704915752 | 0           | 0.023439358 | 0.203243105 | 0.18248504  | 6.935587299 | 0.219644614 | 4.462143954 | 3.125000234 | 0.375761411 | 0.237282111 | 1.215572766 | 2.448250319 | 0           |
| 3.711424357 | 1.188739265 | 0.107669871 | 0.304021881 | 2.098408365 | 4.157430858 | 1.213783922 | 2.719494816 | 2.574751923 | 1.524390025 | 2.363784276 | 0           | 3.488797913 | 0           |
| 5.687111558 | 1.700968302 | 0.178185121 | 0.860322039 | 1.637336214 | 5.35716213  | 1.988205308 | 4.455080929 | 2.927162729 | 1.469257151 | 1.828105768 | 1.363036678 | 5.198752574 | 0.41644686  |
| 4.879622974 | 0.754979145 | 0.108458523 | 1.360206913 | 2.692228679 | 4.213508612 | 2.132386489 | 4.228014929 | 3.954999421 | 0.960111241 | 3.177119363 | 0.880026257 | 6.10934538  | 2.249835655 |
| 2.792979579 | 0.565095634 | 1.020334645 | 0.533043069 | 2.906314534 | 1.916141801 | 1.945735637 | 1.599311631 | 2.785456233 | 0.233656645 | 2.779671029 | 0.257428248 | 5.461127893 | 0.221948903 |
| 5.615079876 | 1.663528531 | 0.60449872  | 0.465806444 | 2.830113633 | 6.337944187 | 2.23248661  | 2.564840353 | 2.881287385 | 1.240425708 | 3.07452637  | 0.813151778 | 3.805480026 | 1.552640614 |
| 5.78198557  | 0.906995674 | 0.074501144 | 0.558921045 | 1.683312807 | 5.474101853 | 1.252383712 | 2.811614679 | 3.557829115 | 1.54858481  | 1.794683392 | 0.776587677 | 5.095006285 | 3.576205381 |
| 5.410583602 | 2.473552822 | 0.964025932 | 0.9144264   | 2.499551376 | 5.163765617 | 3.040264472 | 3.932644057 | 3.371682381 | 1.636574407 | 2.670850679 | 1.118901135 | 4.402389388 | 3.206395666 |
| 6.193407064 | 0.515217447 | 0.969722527 | 0.799256925 | 2.72415771  | 5.435798427 | 2.294736627 | 5.207314746 | 4.54151038  | 1.124544014 | 2.951864613 | 1.035045922 | 5.97930218  | 4.688563694 |
| 6.525903114 | 2.662911123 | 0.308227809 | 2.103035963 | 2.490410877 | 6.044471842 | 2.912236296 | 2.835632944 | 3.821876011 | 2.176272937 | 3.028253819 | 1.563386998 | 5.284057679 | 2.937186944 |
| 5.756322383 | 1.807164576 | 0.11248665  | 0.979641559 | 0.946452721 | 5.565997639 | 1.262055139 | 4.027370892 | 3.352788949 | 2.117252508 | 0.945515685 | 1.669995752 | 5.376386624 | 2.632673453 |
| 5.474861869 | 0.613031336 | 0.082407857 | 0.359500933 | 2.569098136 | 4.613134166 | 1.736509959 | 2.868787091 | 2.940253232 | 0.829082568 | 2.482777614 | 1.198028124 | 4.816072625 | 2.892890084 |
| 7.45097725  | 1.224485633 | 0.068422922 | 0.55926322  | 2.003531851 | 4.549117739 | 0.614147141 | 2.204068476 | 3.325776674 | 0.371925326 | 2.059009472 | 0           | 4.699145644 | 1.257561414 |
| 3.391244904 | 1.362328086 | 0.922863179 | 0.787211493 | 1.987642992 | 3.098633425 | 1.589850965 | 2.286823626 | 2.031474417 | 0.468866415 | 1.839195503 | 0           | 5.18189845  | 0.240780579 |
| 3.684628534 | 1.408364878 | 0.166202607 | 0.086359939 | 2.181151723 | 4.577782671 | 2.17291086  | 1.858582665 | 3.37892977  | 0.295693299 | 3.032270372 | 0.590242089 | 4.663388508 | 2.079866756 |
| 5.648887311 | 0.438531197 | 0.097493908 | 0.674509123 | 2.48840856  | 5.647913131 | 1.51660614  | 2.957462253 | 2.978516593 | 1.901194705 | 2.306309832 | 0.520208516 | 6.106246013 | 5.659060542 |

|             |             |             |             |             |             |             |             |             |             |             |             |             |             |
|-------------|-------------|-------------|-------------|-------------|-------------|-------------|-------------|-------------|-------------|-------------|-------------|-------------|-------------|
| 5.463888198 | 1.479483747 | 2.245234102 | 0.879059041 | 3.16786696  | 4.752994527 | 3.468445186 | 3.681569802 | 2.46519471  | 1.208866085 | 3.021987776 | 0.448184075 | 3.584923879 | 3.180197915 |
| 3.879144316 | 1.423767435 | 0.014628209 | 0.434457218 | 2.343634506 | 3.525674595 | 1.682039067 | 2.990325963 | 3.054321407 | 0.454415367 | 2.448277465 | 0.497089918 | 4.889616392 | 0           |
| 2.244929883 | 1.429436565 | 0.041021903 | 0.181651677 | 1.780668919 | 2.839896816 | 0.648724687 | 0.879831855 | 2.419044721 | 0           | 1.730844727 | 0.331953026 | 4.802432699 | 1.465748323 |
| 11.89457248 | 1.682468462 | 0.212769984 | 1.330021813 | 2.329910766 | 8.659886382 | 2.162638395 | 6.658015065 | 3.648526462 | 3.422633145 | 2.771481343 | 2.129623464 | 4.461096881 | 4.400492095 |
| 3.91984101  | 1.887274279 | 0.127807922 | 0.5977316   | 2.565398091 | 3.378131276 | 2.468363847 | 1.836467766 | 4.334079612 | 0           | 3.233225634 | 0           | 6.886558522 | 2.726303607 |
| 7.165540737 | 2.317012168 | 0.103651174 | 1.034472611 | 0.654676326 | 6.141705751 | 2.029833921 | 3.750717917 | 3.927641132 | 1.194474761 | 0.757784184 | 1.838842846 | 4.949324726 | 3.920287307 |
| 2.529196608 | 0.299495677 | 0.078455047 | 0.186052198 | 2.664164555 | 1.858878113 | 1.760750239 | 1.405065341 | 1.190150575 | 1.010881586 | 3.277649618 | 0           | 4.943125674 | 0.782578135 |
| 5.087385529 | 0.886069878 | 0.789682311 | 0.347970298 | 2.483788253 | 4.081084519 | 1.828526362 | 3.28575729  | 2.130095959 | 0.765289547 | 3.023449341 | 0           | 4.702287896 | 2.436319771 |
| 2.721239909 | 1.015077079 | 0.017731183 | 0.916146477 | 2.740653056 | 2.040074702 | 2.487551708 | 1.199618364 | 2.139996633 | 0.535301291 | 2.682441555 | 0           | 3.716994111 | 0           |
| 3.635228075 | 1.024537839 | 0.162220888 | 0.846669996 | 2.329447047 | 3.264997188 | 2.296795347 | 1.858917769 | 2.066626555 | 0.750729131 | 2.537636942 | 0           | 5.528830526 | 3.01848771  |
| 5.013782232 | 1.725750164 | 1.557607549 | 1.347589422 | 2.920457703 | 5.102044193 | 3.094219418 | 4.840094082 | 3.540413501 | 1.386956839 | 3.209396267 | 1.725750164 | 3.683858036 | 0.726689069 |
| 5.810995928 | 1.4150154   | 0.024066248 | 0.558752839 | 0.917269358 | 5.931875174 | 1.18999133  | 3.722566878 | 3.266816192 | 1.01327898  | 0.925335404 | 1.893743829 | 6.006118424 | 3.410666529 |
| 5.43006827  | 2.234643552 | 0.130283061 | 0.569223682 | 1.809070365 | 4.115521953 | 2.28660632  | 3.076052624 | 3.930272891 | 2.076822897 | 2.255147082 | 0           | 5.508252192 | 3.220702778 |
| 4.749303832 | 1.251535182 | 1.983260686 | 0.451864219 | 0.8829477   | 4.804880681 | 1.972504917 | 1.444997726 | 3.364838878 | 0.28333613  | 0.517315329 | 0           | 2.475466984 | 1.704001697 |
| 3.153572038 | 3.16068793  | 0.536974846 | 0.637198562 | 3.591391318 | 1.970975401 | 3.164922181 | 0.744614961 | 1.913819693 | 0.391799776 | 3.617999386 | 0.759921188 | 4.564553531 | 1.307902675 |
| 3.045538181 | 2.446749261 | 0.043892359 | 0.667140558 | 2.25345415  | 2.806848366 | 1.518112871 | 0.527815139 | 2.738481548 | 0           | 2.601481452 | 0.748586355 | 5.062003694 | 1.347163648 |
| 4.110877067 | 2.2469109   | 0.864582644 | 0.887963034 | 2.427878348 | 3.129855997 | 1.526007878 | 2.052797709 | 2.063769195 | 1.431362949 | 1.661104802 | 0.621744387 | 5.136566906 | 1.102074219 |
| 3.909512152 | 2.710148757 | 0.234559233 | 0.83808826  | 2.269024056 | 3.67239588  | 1.848584047 | 2.790427012 | 2.843267851 | 0.705629917 | 3.052980513 | 0           | 4.459428517 | 0.261733882 |
| 5.390110607 | 1.502093466 | 0.051117282 | 0.909245848 | 2.222066501 | 4.163346952 | 1.780212795 | 3.282165982 | 3.005213091 | 1.385502964 | 2.612353289 | 0.741513818 | 5.146811513 | 3.592109267 |
| 3.295767779 | 2.201814114 | 0.086484092 | 0.713666403 | 3.054747099 | 3.702293902 | 2.465754915 | 3.2302059   | 4.300805547 | 0.338044572 | 2.882953543 | 1.120033812 | 6.07574606  | 2.522463188 |
| 6.545197746 | 1.578560367 | 0.038065392 | 0.660199235 | 2.352863071 | 6.126525805 | 1.882906366 | 3.338002575 | 3.215063136 | 2.055428905 | 2.291142014 | 1.056031382 | 5.817076766 | 1.994956573 |
| 3.420156629 | 2.93969998  | 0.071089369 | 0.582663374 | 2.680915626 | 3.745438783 | 1.496294274 | 2.62231018  | 2.069210633 | 0           | 2.639576526 | 0.280496866 | 4.870893542 | 0.63052991  |
| 5.295699453 | 0.286837684 | 0.193073629 | 0.724266553 | 3.241407392 | 5.521410327 | 2.89357381  | 4.047912618 | 3.531185515 | 0.976611663 | 3.324719101 | 2.252117551 | 4.571732496 | 3.663676436 |
| 7.599832655 | 2.235995775 | 0.049322451 | 1.162697399 | 2.334823679 | 7.008661772 | 3.349388384 | 4.874565367 | 3.646571142 | 2.964079774 | 2.808576289 | 2.772176773 | 4.688076364 | 3.296585222 |
| 4.742622867 | 2.703308438 | 1.905752641 | 0.656708559 | 2.583452069 | 5.00367496  | 2.544690194 | 2.900961161 | 2.7142365   | 1.368474161 | 2.659782832 | 0.370675462 | 4.853123566 | 2.456644288 |
| 5.883257963 | 1.454153937 | 0.03339178  | 1.450872059 | 1.940775986 | 5.521188801 | 2.024997776 | 4.312988555 | 3.745579937 | 1.91249674  | 2.48163933  | 1.939409997 | 4.965882886 | 0           |
| 4.827848248 | 0.980820711 | 0.112457952 | 1.438714313 | 1.260254278 | 4.214083188 | 1.868145504 | 3.026595504 | 3.150371579 | 0.34225508  | 1.523449183 | 0.375718042 | 3.718221688 | 3.060854566 |
| 3.37580658  | 0.888740192 | 0.120382099 | 0.771044603 | 2.247894102 | 2.482123782 | 1.217106912 | 1.333969708 | 2.415163894 | 0.554202985 | 2.009069716 | 0.333650945 | 5.379321775 | 3.235385736 |
| 5.848986484 | 0.556831341 | 1.355120097 | 0.797169355 | 2.617452493 | 4.494520722 | 3.032216321 | 3.835313111 | 3.249774886 | 1.352992772 | 3.125867425 | 2.24552898  | 3.469035194 | 3.259617251 |
| 5.345135292 | 0           | 1.506267412 | 0.566418524 | 2.123134354 | 3.690378176 | 1.968861401 | 3.407322142 | 2.662292965 | 1.109660121 | 2.823546424 | 1.322530291 | 4.232520076 | 3.41625158  |
| 3.359283099 | 1.012303971 | 0.544869486 | 0.995436878 | 2.638514252 | 2.9155185   | 2.013445495 | 2.586394071 | 2.19607907  | 0.740975653 | 2.495346224 | 0           | 4.72776383  | 0           |
| 4.592246707 | 0.227863563 | 0.981108559 | 0.460919432 | 1.712864327 | 2.826954133 | 1.395484596 | 1.665910757 | 1.984382092 | 0.248789067 | 1.739863041 | 0           | 5.603204156 | 0.617399733 |
| 4.463420139 | 1.749768779 | 0.209787912 | 0.240905705 | 1.549200502 | 3.730288337 | 0.820396351 | 3.238969067 | 3.710030175 | 1.20143039  | 1.062663359 | 1.488054804 | 5.174636389 | 0           |
| 1.046755589 | 0           | 0.048425544 | 0.015082656 | 3.000308278 | 1.566430956 | 0.196804616 | 0.291285006 | 2.925688115 | 0           | 2.411506618 | 0           | 3.341177986 | 0.371020598 |
| 4.654148578 | 2.20902887  | 0.083042151 | 0.563958976 | 2.387665533 | 4.434626325 | 2.071630063 | 3.783629269 | 3.084428283 | 0.213428327 | 2.493546623 | 1.560085273 | 4.194437103 | 1.039666388 |
| 2.286746111 | 2.151106606 | 2.361224204 | 0.317273301 | 2.769855102 | 2.226571517 | 2.081024001 | 0.541359222 | 1.866260327 | 0           | 1.982880249 | 0           | 4.768582191 | 0           |
| 5.215978393 | 0.663733932 | 1.242712711 | 0.521711861 | 2.730391896 | 4.609724078 | 2.637642185 | 2.662861174 | 3.099093083 | 0.715976968 | 2.91628505  | 0.440417873 | 4.395318248 | 4.35413685  |
| 4.132870803 | 0.27409507  | 0.088623032 | 0.475188485 | 1.72207489  | 4.936678857 | 1.354161904 | 2.803100068 | 2.960861628 | 0.75743012  | 1.607767614 | 0.59594682  | 5.38551879  | 0.725220796 |
| 5.690853045 | 1.101493596 | 0.126561145 | 0.923867222 | 2.231338508 | 5.325576251 | 1.615180197 | 4.129399317 | 3.258023624 | 1.485679993 | 2.559062732 | 2.070689372 | 5.030734889 | 2.194292539 |
| 5.928943678 | 0           | 0.041750993 | 0.53803056  | 3.168735173 | 5.55050211  | 2.854436316 | 4.918940119 | 2.805659074 | 1.047324882 | 2.999282134 | 1.127775689 | 5.051854851 | 3.244262038 |
| 6.209691985 | 1.439904833 | 0.166410848 | 0.49166518  | 2.631105206 | 5.462664852 | 2.504273366 | 3.593698278 | 4.221050644 | 1.65696447  | 3.190743071 | 0.923948775 | 5.89741462  | 2.107793011 |
| 5.202462756 | 1.65863061  | 0.156144502 | 0.788503788 | 2.041896144 | 4.60314459  | 1.339207214 | 3.531037114 | 2.019729432 | 1.253494496 | 1.620433403 | 0           | 3.278638368 | 2.765237933 |
| 3.153934037 | 0.823998531 | 0.156123162 | 0.43647759  | 2.116925858 | 2.827801395 | 0.72260798  | 1.372867142 | 2.027231489 | 0           | 1.982929275 | 0           | 4.921656095 | 0.401208556 |
| 5.14402623  | 0           | 0.137626197 | 0.34786116  | 2.585461727 | 2.425032723 | 1.46416681  | 2.169540965 | 3.944834501 | 0.526828241 | 3.188742407 | 0           | 5.892766206 | 0.273177744 |
| 3.862111274 | 1.281121346 | 0.243739262 | 0.411419978 | 1.867033767 | 3.177518686 | 1.361624295 | 1.094489658 | 1.779756102 | 0.259017192 | 2.001500421 | 0.285123647 | 5.078739422 | 2.294749643 |
| 4.652537807 | 0.288111237 | 0.066055476 | 0.406609223 | 3.061905716 | 2.827868693 | 1.873454614 | 1.155915536 | 2.348204197 | 0.313994259 | 2.090533149 | 0           | 5.614241552 | 4.469896541 |
| 3.334791629 | 0.856793211 | 0.011761198 | 0.228191443 | 3.235316593 | 3.718209491 | 3.273164357 | 2.403795152 | 1.57994782  | 0.375589688 | 3.897477851 | 0.411871803 | 4.349994454 | 1.57001104  |
| 4.055462996 | 2.078188964 | 0.946384169 | 1.491893806 | 2.591251191 | 3.090524519 | 1.430430462 | 3.315273335 | 2.652022163 | 1.12544055  | 2.341695322 | 0           | 4.400833325 | 0.355525713 |
| 3.503217738 | 0.918136469 | 0.129988565 | 0.980472167 | 0.56004595  | 2.180310046 | 1.35563476  | 0.556624053 | 2.282919692 | 0.407312903 | 0.371851051 | 0           | 5.236029974 | 0.693462805 |
| 2.133045766 | 2.97671134  | 0.009350555 | 0.550344563 | 2.214082005 | 2.387391932 | 1.807317767 | 1.759823672 | 1.949189458 | 0.305937213 | 2.101587904 | 0.336247148 | 3.495688165 | 0.740157509 |
| 5.751266652 | 1.429641287 | 0.096581951 | 1.462475109 | 2.626527917 | 5.653523762 | 2.172299086 | 3.879168521 | 3.443461552 | 0.456948469 | 3.099224414 | 1.292273875 | 4.837315408 | 1.46595605  |
| 6.086859522 | 2.633807542 | 0.156863741 | 0.334235474 | 2.176159635 | 5.534367154 | 1.778783709 | 3.479694976 | 2.804570443 | 0.72643572  | 1.868261471 | 0.932886759 | 5.636611016 | 1.258894145 |
| 3.887041984 | 2.353009586 | 0.060134063 | 0.467834562 | 2.753873496 | 3.441052126 | 1.931782297 | 2.35615403  | 2.164993667 | 0.307875017 | 2.885193859 | 0.338355376 | 4.592053177 | 0.926073839 |
| 5.453668253 | 2.471494111 | 0.131712617 | 1.89231193  | 2.241847805 | 5.500555606 | 2.282743225 | 4.173260249 | 3.506628513 | 2.205294425 | 2.848428546 | 0.693660727 | 5.113204194 | 2.379863247 |
| 4.462705759 | 2.672606151 | 0.112883506 | 0.698984361 | 2.995955839 | 3.692812137 | 1.840542526 | 1.671626139 | 3.627531942 | 0.657104912 | 3.186311737 | 0           | 5.883518497 | 0           |
| 4.534921331 | 1.9385065   | 0.41493242  | 0.580818684 | 3.1492567   | 4.169707243 | 2.289607469 | 3.16314523  | 3.525681491 | 1.658784664 | 3.320684192 | 1.377485434 | 5.882333037 | 1.239146418 |
| 2.924814076 | 0.856393673 | 0.09        |             |             |             |             |             |             |             |             |             |             |             |

|             |             |               |             |             |             |             |             |             |             |             |             |             |             |
|-------------|-------------|---------------|-------------|-------------|-------------|-------------|-------------|-------------|-------------|-------------|-------------|-------------|-------------|
| 6.665642539 | 1.280960505 | 0.336728548   | 0.165917772 | 1.993881235 | 6.239962882 | 2.403907345 | 2.511672138 | 3.461746459 | 1.23161204  | 2.39462118  | 1.699175786 | 2.69302534  | 2.924029009 |
| 6.207669598 | 2.264739101 | 0.095036057   | 1.532647149 | 1.541794225 | 4.621397851 | 2.30748028  | 4.204720422 | 2.906957598 | 1.796468506 | 0.90696113  | 1.638891211 | 4.872062753 | 2.021468518 |
| 5.043182803 | 0           | 0.507620462   | 1.157404533 | 0.944457195 | 4.265351998 | 1.635086626 | 3.620108057 | 3.246551924 | 0.736459187 | 0.621767067 | 0.799162613 | 5.278215937 | 4.424755047 |
| 5.280772192 | 1.375886631 | 0.117071701   | 0.810215917 | 2.383869799 | 3.999431271 | 1.710450006 | 2.262749924 | 2.212752969 | 0.664422444 | 2.262582338 | 0           | 3.051500051 | 3.490100131 |
| 6.511445466 | 0.513276725 | 0.245427371   | 0.354817373 | 3.01005683  | 6.50726871  | 1.853255744 | 4.661546858 | 3.18675151  | 0.834599411 | 2.603170564 | 1.781202558 | 4.752193576 | 0.199378461 |
| 3.49494569  | 0           | 0.314826827   | 0.405061172 | 2.024897038 | 3.542777599 | 1.316419773 | 1.86333191  | 2.690728519 | 0.35754469  | 2.249967835 | 0           | 5.309957287 | 1.517168875 |
| 3.097317133 | 2.025032606 | 0.115030226   | 0.417107883 | 2.255809521 | 2.039040995 | 1.005594441 | 1.627080694 | 2.072203278 | 0.567964237 | 1.761900583 | 0.342573874 | 4.239417262 | 0.752345629 |
| 3.414939738 | 0.935841023 | 0.058617973   | 0.366673393 | 2.459255611 | 3.05091286  | 1.270368967 | 2.264528613 | 2.065774294 | 0           | 2.775847306 | 0.354986827 | 3.93942353  | 0.963488358 |
| 4.21833259  | 0.726392074 | 1.14331179    | 0.375097118 | 1.970252649 | 5.665562511 | 0.526910238 | 2.414019629 | 3.7940911   | 1.545897143 | 1.859488202 | 0.616633684 | 2.900988154 | 1.240045544 |
| 4.954962395 | 1.949532825 | 1.460508602   | 0.40492848  | 3.242498757 | 2.88495563  | 3.045724829 | 2.291412938 | 2.950792985 | 1.087158216 | 3.334212651 | 0.321813022 | 5.808991775 | 2.138829977 |
| 5.81614155  | 0.625957533 | 0.08075383    | 0.571578828 | 0.54113177  | 5.588540212 | 1.791153429 | 4.288564253 | 3.724711836 | 0.997061393 | 0.800008684 | 1.350058727 | 5.80577516  | 2.513612394 |
| 5.251639689 | 2.122207862 | 0.197456541   | 0.675778131 | 2.76494067  | 5.143755991 | 2.076676062 | 3.542076587 | 4.674477492 | 0.495576546 | 3.035451552 | 0.541442233 | 6.782522909 | 1.351013537 |
| 5.796820495 | 2.095596759 | 0.053480766   | 1.067525329 | 1.149025785 | 5.583974952 | 1.573681677 | 3.616147153 | 3.269872544 | 1.346798589 | 1.255287913 | 1.440935017 | 5.663765266 | 1.559110008 |
| 4.139282347 | 1.636359827 | 0.156959898   | 0.955810424 | 2.973644068 | 4.445185967 | 2.760673353 | 1.741401862 | 2.341443483 | 0.762055728 | 3.257185793 | 1.022169652 | 3.64601528  | 1.861223197 |
| 4.060054442 | 0.789839498 | 0.046986818   | 0.6924714   | 2.397659404 | 4.387434366 | 1.167941463 | 3.877102808 | 3.354659    | 0           | 2.443805686 | 0.375125054 | 6.082578969 | 0.325168165 |
| 3.233043185 | 2.270167496 | 0.089063832   | 0.151210806 | 2.435132299 | 3.431426788 | 1.089649112 | 2.433307234 | 3.411689303 | 0.275374854 | 2.648114499 | 0           | 4.167212767 | 1.480505266 |
| 4.021722544 | 2.043602157 | 0.118611581   | 0.35224711  | 1.37924884  | 2.890647408 | 1.5915648   | 2.035128153 | 3.074172897 | 0.280585933 | 1.147664933 | 0.778735968 | 6.02847651  | 1.392134294 |
| 5.682623553 | 0.778584713 | 0.051170602   | 0.570117746 | 0.506966886 | 5.596683069 | 2.526945268 | 3.279218    | 2.768298713 | 0           | 0.334207976 | 0.662622039 | 5.641488154 | 5.159511497 |
| 4.902224137 | 0.345398042 | 0.080431142   | 0.61784786  | 2.057742107 | 4.732588533 | 2.683113608 | 4.947067065 | 2.457277392 | 0.920411337 | 2.62712319  | 0.412090932 | 4.225932056 | 3.648485864 |
| 5.143202277 | 0.452337265 | 0.243648065   | 0.678752688 | 1.906849535 | 4.225495929 | 1.545756141 | 3.69881585  | 3.207923881 | 1.147464264 | 1.93273316  | 0           | 5.328198351 | 2.625969286 |
| 6.228000013 | 1.759698622 | 0.033122921   | 0.44937896  | 2.233681631 | 4.232990239 | 2.492314627 | 2.086546153 | 1.872883654 | 1.209422535 | 2.421949761 | 0.874444427 | 1.898859676 | 2.660094751 |
| 4.859055962 | 2.373497234 | 0.04200849    | 0.913527321 | 1.144259963 | 5.424344937 | 1.189832618 | 3.566126879 | 3.171111108 | 0.690062842 | 1.126693011 | 1.240624776 | 3.565750552 | 0           |
| 2.435663989 | 0.528061304 | 0.028674749   | 0.441973677 | 2.689032357 | 2.956558468 | 1.816097308 | 1.713950029 | 3.264913518 | 0           | 2.791036183 | 0           | 5.812588711 | 0.545878113 |
| 12.15577746 | 0.639716476 | 0.266346208   | 1.623287939 | 1.006057652 | 9.41018149  | 2.260585905 | 5.723206301 | 3.601973795 | 2.563305048 | 1.015321513 | 0.750201755 | 4.014648515 | 4.822237516 |
| 5.616979651 | 0.664273938 | 0.4135883     | 1.037094954 | 1.951061851 | 5.004325684 | 2.403962889 | 3.854173114 | 3.445750825 | 1.383009642 | 2.450764137 | 1.051079194 | 5.447918346 | 3.615514268 |
| 4.208468546 | 0.790641632 | 0.243862805   | 0.246062416 | 2.917270316 | 4.189431898 | 1.624719859 | 1.811701914 | 2.806292711 | 0.850261758 | 2.230236103 | 0           | 5.456459291 | 2.33637006  |
| 4.0293531   | 1.486274756 | 0.069148296   | 0.288883077 | 3.243752613 | 3.679139465 | 2.501263776 | 2.441891221 | 3.309763787 | 0           | 3.557854566 | 0           | 4.918379838 | 0.247889348 |
| 6.211587143 | 0           | 0.087484412   | 0.890527971 | 1.523703396 | 6.10368474  | 1.755447846 | 3.417473038 | 3.006096094 | 2.358760844 | 1.732775527 | 1.503472232 | 5.248333698 | 0.832864236 |
| 6.518638814 | 2.457961043 | 0.408311377   | 0.789405242 | 0.090353039 | 4.779407125 | 1.347980806 | 3.310237173 | 2.927052891 | 0.964019829 | 0.09802705  | 1.040103561 | 5.080959046 | 3.396854491 |
| 2.285075029 | 1.906846266 | 0.075706364   | 0.514245762 | 2.208527749 | 1.649587805 | 1.43030656  | 1.191599147 | 1.680424389 | 0.236258365 | 1.757394328 | 0           | 4.987088936 | 0           |
| 5.117424795 | 0.276283967 | 0.115145083   | 0.834396358 | 2.643388679 | 4.968019459 | 1.85274766  | 3.036453536 | 2.921656607 | 0.762591825 | 2.750712709 | 0           | 4.543468539 | 2.242962971 |
| 2.993494144 | 0.703330668 | 0.062657032   | 0.816694198 | 2.364535613 | 2.734565852 | 1.627432577 | 0.735489227 | 2.488236425 | 0.299082647 | 2.574420221 | 0           | 5.657757029 | 1.063191714 |
| 6.062644153 | 2.211655955 | 0.054938862   | 1.452452523 | 1.127571876 | 5.524371012 | 2.202493826 | 3.742086348 | 3.398939942 | 0.956104441 | 0.876884898 | 1.205170278 | 5.100247474 | 4.790641695 |
| 3.499767323 | 1.466990574 | 0.019141812   | 0.239924081 | 2.231298439 | 2.847248854 | 1.409512256 | 0.765807551 | 2.289391749 | 0.404338389 | 2.351664794 | 0           | 6.325172472 | 2.768487171 |
| 6.311615877 | 1.299915166 | 0.307048849   | 0.51830416  | 3.069213332 | 6.324895058 | 2.395560174 | 4.484751    | 3.406057451 | 1.617246488 | 3.226976887 | 1.186801589 | 4.739532918 | 1.935646274 |
| 2.540147153 | 1.562214823 | 0.316632343   | 0.455664201 | 2.352052447 | 2.566820837 | 1.26542355  | 1.980285121 | 1.564575413 | 0.280763389 | 1.914719169 | 0           | 4.916215287 | 1.011583999 |
| 6.91767565  | 2.009028937 | 0.071608589   | 0.47356463  | 2.966104072 | 6.348228211 | 2.079864829 | 4.132809053 | 3.047835183 | 0.453897767 | 3.25597174  | 0.865234206 | 4.761903377 | 0.765110684 |
| 4.946528131 | 0           | 0             | 1.815955665 | 0.998996049 | 4.916785181 | 4.409834921 | 0           | 3.01504504  | 0           | 0.938549392 | 0           | 5.194062582 | 2.858600192 |
| 2.850066919 | 1.672832324 | 0.050104973   | 0.134775033 | 2.494812211 | 2.039156359 | 1.521331179 | 2.004004096 | 3.164261788 | 0.214724911 | 2.060384815 | 0           | 5.420995305 | 0.54143915  |
| 3.550142683 | 0.892557712 | 0.186893048   | 0.315963091 | 3.049474107 | 3.168071672 | 1.483878947 | 2.312064182 | 3.087493882 | 0.394005873 | 2.287677818 | 0           | 5.045522238 | 2.666101227 |
| 3.709183134 | 1.305694302 | 0.023914504   | 1.146930178 | 0.514063768 | 3.169404569 | 0.81832844  | 2.074991399 | 2.205935239 | 0           | 0.224523517 | 0           | 4.927509667 | 0           |
| 3.082584698 | 2.001483955 | 0.105412395   | 0.421334072 | 0.272620639 | 1.86771895  | 1.368347258 | 1.81442532  | 2.106051675 | 0.243163194 | 0.172844707 | 0.267815285 | 5.632881434 | 1.147716802 |
| 4.544593918 | 0.481536215 | 0.079959264   | 0.217257149 | 3.409434744 | 4.002012564 | 2.600757945 | 1.363263008 | 1.574310107 | 1.206366738 | 3.010930274 | 0           | 5.692403503 | 1.022000169 |
| 4.741929991 | 0.816573166 | 0.045012971   | 1.25965389  | 2.740773274 | 5.154016408 | 2.228196659 | 3.995988382 | 2.664695941 | 0.504538713 | 2.161397366 | 0.301697985 | 5.302080523 | 3.12478441  |
| 6.263658053 | 2.880092252 | 0.10457122    | 0.730839215 | 2.402379804 | 5.400009049 | 2.135378895 | 4.328571865 | 3.768927813 | 1.242142976 | 3.307849305 | 1.711859329 | 5.161405025 | 2.080389734 |
| 6.717270106 | 0           | 0.086439188   | 0.982463917 | 2.130288134 | 5.870713611 | 1.978767297 | 3.439295934 | 3.138105493 | 1.31929334  | 1.894231785 | 0.501209395 | 6.026661332 | 4.167939742 |
| 4.540830487 | 0.182933716 | 0.169732647   | 0.397892534 | 0.686484969 | 3.953851566 | 1.524041958 | 2.936133832 | 3.374003738 | 1.029249728 | 0.536253578 | 0.220617419 | 6.2543909   | 0.882857205 |
| 6.391990551 | 0.927199315 | 0.102601289   | 0.396172365 | 2.880392145 | 7.186299446 | 1.994873475 | 4.902738915 | 3.159121462 | 3.644337652 | 3.368495076 | 1.07171614  | 5.039283537 | 2.808187618 |
| 4.823204668 | 0.251677552 | 0.06511382    | 0.266088504 | 2.713307851 | 5.247892798 | 3.804053886 | 3.496714037 | 3.781688862 | 1.30307846  | 3.599229716 | 1.517806654 | 6.293280427 | 3.549562959 |
| 3.700996908 | 0.486209188 | 0.29575256    | 0.735512582 | 0.902959313 | 3.66033483  | 1.447367585 | 2.880209866 | 3.013979513 | 0.526905488 | 0.915580508 | 0.316039745 | 5.373899916 | 2.72891892  |
| 3.640689429 | 2.971006455 | 0.972102627   | 0.397288484 | 2.37679455  | 2.564654085 | 1.552269263 | 3.078496611 | 2.298284367 | 0.280953377 | 2.842169402 | 0.309043604 | 4.776625925 | 0.687175487 |
| 5.01004128  | 2.457645438 | 1.105963869   | 0.687991102 | 2.677326985 | 4.091704871 | 2.316018414 | 3.263363891 | 3.315656568 | 1.601769201 | 2.825239726 | 2.285840653 | 4.679196321 | 2.97737456  |
| 3.962546708 | 2.287913666 | 0.09571332    | 0.775660677 | 2.260418365 | 3.251262124 | 1.580506851 | 1.345615923 | 2.300887711 | 0           | 2.278032071 | 0           | 4.412724265 | 1.594771324 |
| 2.697650821 | 0.341652937 | 1.045404201   | 0.869464788 | 2.890671386 | 3.098916288 | 2.436979844 | 1.54053298  | 2.68696068  | 0.371757791 | 2.834666373 | 0           | 6.449224651 | 0.875088932 |
| 4.747505617 | 1.67736684  | 0.112141264   | 0.577105956 | 2.538005851 | 4.669801158 | 1.403545209 | 4.205666685 | 3.360555535 | 1.252097321 | 2.421999243 | 0.821879968 | 4.679436174 | 4.537422424 |
| 7.825968793 | 0.455255851 | 0.146298727   | 1.002182379 | 2.882349342 | 7.389249003 | 2.89317178  | 3.675932124 | 3.903523887 | 2.912660643 | 3.31754503  | 0.931268725 | 5.385370439 | 4.474677014 |
| 3.494348732 | 0.876902024 | 0.262367078</ |             |             |             |             |             |             |             |             |             |             |             |

|             |             |             |             |             |             |             |             |             |             |             |             |             |             |
|-------------|-------------|-------------|-------------|-------------|-------------|-------------|-------------|-------------|-------------|-------------|-------------|-------------|-------------|
| 5.720780786 | 1.259959759 | 0.167600487 | 0.438741326 | 2.927151114 | 5.385286667 | 2.259197153 | 2.667182317 | 2.961910366 | 1.188179169 | 2.879520636 | 2.044599828 | 5.056234406 | 2.865834568 |
| 4.972118341 | 0           | 0.068139318 | 0.666374444 | 2.828764795 | 5.527115776 | 1.931841368 | 3.811628658 | 3.494731127 | 0           | 3.317251872 | 0           | 3.383030922 | 5.015283629 |
| 2.981920458 | 1.73935555  | 0.098714375 | 0.848607675 | 2.515217273 | 2.3305305   | 1.929708524 | 2.429850598 | 1.574798816 | 0           | 2.418376926 | 0.333278678 | 4.328892643 | 0           |
| 6.522619858 | 0.353906459 | 0.573617628 | 0.45754366  | 3.243618193 | 7.790816572 | 3.490096984 | 4.351983639 | 4.344513145 | 0.384953996 | 3.451121163 | 0.748114156 | 5.066820457 | 2.633936554 |
| 6.507996621 | 2.511461883 | 0.017751165 | 0.520556305 | 2.330510086 | 5.351858613 | 3.399487678 | 4.160062922 | 2.425247994 | 1.972105262 | 3.726688376 | 1.584437039 | 3.310959017 | 1.739821047 |
| 2.643366346 | 0.303552792 | 0.145823154 | 0.399141462 | 2.449043061 | 2.233726401 | 1.264746638 | 2.347580555 | 3.616205944 | 0           | 2.17766883  | 0           | 6.558233077 | 1.879867014 |
| 4.01177385  | 0.501733308 | 0.1467139   | 0.435971689 | 1.8464197   | 2.835935479 | 0.690268456 | 1.575772011 | 1.992766578 | 0.937351986 | 1.822729767 | 0.326732302 | 4.98647784  | 0.721733611 |
| 5.845050576 | 0.597598668 | 0.08171026  | 1.421799063 | 2.956740072 | 5.416383616 | 3.551871524 | 3.25625991  | 3.531427641 | 1.429506761 | 3.862767024 | 0           | 5.271573578 | 1.977098779 |

### The validation set

<https://www.ncbi.nlm.nih.gov/geo/query/acc.cgi?acc=GSE151419>

|      | age | grade | stage | M | T | MIR324      | XIST        | MIR210      | MIR25       | GABPB1.AS1  | LINC00894   | SNHG7       | FGD5.AS1    | MIR22HG     | MIR126      | MALAT1      |
|------|-----|-------|-------|---|---|-------------|-------------|-------------|-------------|-------------|-------------|-------------|-------------|-------------|-------------|-------------|
| 001C | -   | -     | -     | - | - | 20.03255    | 0           | 10.993069   | 14.395685   | 2.023725    | 2.988192    | 4.974711    | 7.011268    | 9.213046    | 1.778291    | 92.194867   |
| 004C | -   | -     | -     | - | - | 22.21272431 | 0.03694517  | 23.46471422 | 21.94828711 | 0.75124238  | 2.27431879  | 3.56426039  | 15.19911397 | 6.23607729  | 4.33801439  | 88.31860374 |
| 005C | -   | -     | -     | - | - | 13.345747   | 6.836745    | 7.55248     | 20.439647   | 2.350286    | 1.716816    | 3.836787    | 5.710112    | 8.23539     | 3.909519    | 77.032704   |
| 006C | -   | -     | -     | - | - | 14.8269868  | 0.01896991  | 8.60587346  | 12.39655581 | 0.47941213  | 2.69486469  | 4.61884854  | 8.61593684  | 18.0389022  | 10.02331144 | 80.60818422 |
| 009C | -   | -     | -     | - | - | 30.80111507 | 0           | 18.26066108 | 8.69555289  | 2.52985467  | 1.41510737  | 6.38807936  | 5.33833397  | 20.30321325 | 15.03819147 | 96.7992325  |
| 011C | -   | -     | -     | - | - | 49.63599324 | 16.63643284 | 32.9129024  | 34.18294051 | 4.10592902  | 4.71884365  | 9.51040654  | 5.62044671  | 4.93347661  | 30.84332842 | 223.1328725 |
| 012C | -   | -     | -     | - | - | 11.05212447 | 0.01378678  | 8.33933028  | 10.92055156 | 0.58203953  | 0.75440407  | 4.56024137  | 7.77698215  | 7.8338317   | 4.31682979  | 38.19137039 |
| 016C | -   | -     | -     | - | - | 1.12476713  | 0.49107487  | 4.24343961  | 5.55688521  | 0.29345167  | 0.47246267  | 10.50654162 | 22.28818896 | 6.75312292  | 2.19660403  | 16.34657274 |
| 019C | -   | -     | -     | - | - | 35.20949023 | 0           | 14.68185203 | 22.88837476 | 2.14433121  | 0.63246194  | 5.00899834  | 11.73583461 | 19.93450199 | 6.33334793  | 75.73665171 |
| 024C | -   | -     | -     | - | - | 39.58230937 | 0           | 20.18017001 | 7.39939567  | 0.59956684  | 0.91278327  | 3.86233127  | 11.90594634 | 18.22838398 | 5.22310283  | 67.15997459 |
| 028C | -   | -     | -     | - | - | 4.1274048   | 0           | 9.3429436   | 1.0195673   | 0.7129077   | 0.7720525   | 6.3271833   | 13.9039485  | 8.8052915   | 11.0832958  | 36.5465076  |
| 030C | -   | -     | -     | - | - | 5.8094445   | 0           | 5.0097028   | 0           | 0.6696275   | 0.42487     | 4.8511679   | 23.1580369  | 14.9485772  | 0.8103931   | 27.5848368  |
| 034C | -   | -     | -     | - | - | 0           | 0           | 8.78528018  | 5.75226678  | 0.39377529  | 0.76417904  | 19.90588799 | 8.94622664  | 13.99731093 | 5.68459305  | 180.002915  |
| 035C | -   | -     | -     | - | - | 8.818724654 | 0.007333842 | 6.654128603 | 12.19923577 | 3.740938008 | 1.273366378 | 15.16130568 | 11.29814235 | 5.49088174  | 3.4444901   | 85.04211966 |
| 045C | -   | -     | -     | - | - | 8.87340631  | 0.01229886  | 13.39077679 | 14.61295086 | 0.50016969  | 0.15530449  | 6.21512847  | 7.94242786  | 6.90616084  | 5.77641352  | 58.7736055  |
| 050C | -   | -     | -     | - | - | 2.9083383   | 7.9633628   | 12.069604   | 4.3105728   | 0.5269342   | 0.4199451   | 5.5278508   | 23.0524496  | 8.9733827   | 0           | 27.4064793  |
| 058C | -   | -     | -     | - | - | 10.4264813  | 18.7833105  | 11.8008811  | 0           | 1.2593835   | 0.5474604   | 9.5602075   | 11.9327431  | 10.5783741  | 0           | 42.5779745  |
| 059C | -   | -     | -     | - | - | 0.72539233  | 6.58147903  | 3.83139038  | 2.15027011  | 0.18224537  | 0.05713196  | 5.08542593  | 24.71197194 | 3.205962    | 1.41664855  | 6.80816534  |
| 062C | -   | -     | -     | - | - | 10.6706717  | 2.6067263   | 4.0257534   | 0           | 0.7411051   | 0.1925969   | 4.000274    | 17.5415674  | 10.2329098  | 0           | 35.8616231  |
| 065C | -   | -     | -     | - | - | 0.8875509   | 1.40609298  | 1.33939499  | 1.75396963  | 0.20583286  | 0.04660239  | 8.22286797  | 22.91406979 | 6.19234689  | 6.06667142  | 5.56181665  |
| 067C | -   | -     | -     | - | - | 6.18486499  | 8.06881496  | 1.75003566  | 6.11123565  | 0.51920068  | 0.25370858  | 7.01491088  | 23.87383803 | 6.68326859  | 0.75491734  | 9.93852349  |
| 068C | -   | -     | -     | - | - | 4.15497476  | 4.36412854  | 9.40535195  | 3.28440862  | 0.36937409  | 0.17453128  | 6.03212446  | 18.98056604 | 6.32903121  | 3.24576852  | 18.25350887 |
| 069C | -   | -     | -     | - | - | 4.38922121  | 6.61776082  | 8.61085398  | 3.46957486  | 0.69132981  | 0.2419868   | 7.83109797  | 37.47424857 | 13.8353074  | 5.1431345   | 31.24995156 |
| 073C | -   | -     | -     | - | - | 1.5187613   | 10.3474125  | 0.5729872   | 0.7503404   | 0.6824215   | 0.2990444   | 2.1468888   | 24.3835037  | 6.5012749   | 0.7415129   | 13.3832273  |
| 074C | -   | -     | -     | - | - | 0           | 0.008671391 | 4.720626369 | 0           | 0.231740006 | 0           | 8.285993963 | 23.00665174 | 6.666211606 | 9.163568833 | 7.018483141 |
| 075C | -   | -     | -     | - | - | 15.3697269  | 29.836368   | 16.5673679  | 8.6781451   | 2.7899992   | 0.4323289   | 7.5496867   | 21.843353   | 3.0515915   | 0           | 25.0204156  |
| 081C | -   | -     | -     | - | - | 3.55153046  | 10.89852448 | 4.8236241   | 0.70185007  | 0.72754794  | 0.32633864  | 1.75034461  | 19.11942996 | 11.15532627 | 0.69359301  | 17.82466693 |
| 082C | -   | -     | -     | - | - | 7.5910692   | 5.4038403   | 11.4556135  | 1.5001399   | 1.0782774   | 0.2790075   | 10.64357    | 19.3524182  | 10.5080125  | 0           | 24.9432735  |
| 083C | -   | -     | -     | - | - | 0.9179852   | 0           | 0.6926615   | 2.7211703   | 0.4923102   | 0.120501    | 2.8583248   | 20.046821   | 5.9453835   | 1.792771    | 8.8246109   |
| 084C | -   | -     | -     | - | - | 0           | 2.3381555   | 6.8990276   | 2.2586102   | 0.3092294   | 0.2400421   | 7.4230044   | 20.8174226  | 4.2570189   | 4.4640767   | 2.0586762   |
| 090C | -   | -     | -     | - | - | 1.015823    | 8.4055649   | 2.2994538   | 2.0074597   | 0.5398722   | 0.173347    | 4.4436703   | 16.4157072  | 5.8731306   | 1.9838425   | 10.9881763  |
| 091C | -   | -     | -     | - | - | 19.0309044  | 17.4179561  | 11.1686418  | 2.0893718   | 0.7662287   | 0.5551391   | 2.9082901   | 16.3159127  | 7.4058643   | 2.0647909   | 31.8539106  |
| 091N | -   | -     | -     | - | - | 2.950061825 | 0.391385953 | 0.127052448 | 1.687225468 | 0.405705865 | 0.195456583 | 5.121516065 | 25.79447826 | 12.42183865 | 0.262500615 | 26.47945337 |
| 096C | -   | -     | -     | - | - | 6.47879321  | 0.03591937  | 0           | 8.53555296  | 1.41903133  | 0.65201203  | 6.47680509  | 13.48454342 | 7.80377079  | 0           | 21.78394007 |
| 104C | -   | -     | -     | - | - | 7.33474131  | 20.68486137 | 6.14932857  | 4.02634609  | 1.90969602  | 0.24605095  | 4.85719118  | 30.40028622 | 14.88318741 | 5.57056824  | 27.50516356 |
| 106C | -   | -     | -     | - | - | 0           | 0.3805244   | 17.2628368  | 15.0707306  | 0.847449    | 0.8008486   | 17.7727096  | 14.618403   | 9.5390759   | 11.1700709  | 27.0756734  |
| 106N | -   | -     | -     | - | - | 4.75179216  | 0.8516447   | 0           | 1.87808928  | 0.85863631  | 1.06037937  | 4.12099038  | 19.75452709 | 13.94792629 | 5.56798234  | 47.10260787 |
| 107C | -   | -     | -     | - | - | 1.21265479  | 4.15741753  | 1.37250473  | 1.19821842  | 0.24021563  | 0.05571346  | 3.27779612  | 32.22929652 | 3.89320666  | 0.59206087  | 10.73182171 |
| 117C | -   | -     | -     | - | - | 13.61170968 | 0.005957786 | 7.027289354 | 12.74178839 | 1.713343686 | 0.639474013 | 4.666612794 | 20.29183399 | 16.54810964 | 12.591885   | 42.91021004 |
| 118C | -   | -     | -     | - | - | 9.64469499  | 5.39895878  | 1.81934019  | 5.95617325  | 0.27376415  | 0.15825354  | 1.03633302  | 15.65994145 | 9.34955635  | 0           | 9.82921657  |
| 119C | -   | -     | -     | - | - | 3.30722188  | 0.02062768  | 0           | 0           | 0.64714048  | 0.13023853  | 7.09149815  | 16.39720737 | 3.92995647  | 0           | 20.47379996 |
| 119N | -   | -     | -     | - | - | 3.385710432 | 0.009385434 | 1.703114944 | 2.23026957  | 0.256275227 | 0.029628759 | 5.454279506 | 21.56028673 | 11.85792354 | 1.102015552 | 9.85394489  |
| 123C | -   | -     | -     | - | - | 0           | 1.11748235  | 0           | 0           | 0.34355864  | 0.09608702  | 4.33470751  | 47.49905111 | 8.19689081  | 2.04221243  | 5.07579011  |
| 123N | -   | -     | -     | - | - | 0           | 1.57327764  | 0           | 1.3644506   | 0.4003045   | 0.07250599  | 5.38117963  | 26.35828173 | 12.82016948 | 4.04519472  | 7.48819217  |
| 124C | -   | -     | -     | - | - | 3.36429523  | 5.92671704  | 6.7693698   | 1.10808137  | 0.41178133  | 0.3091342   | 7.7976285   | 31.31047918 | 16.42751034 | 0           | 20.3274394  |
| 125C | -   | -     | -     | - | - | 3.7657034   | 3.4878646   | 1.4206972   | 0.9302184   | 0.3138451   | 0.1482936   | 1.02506     | 16.7363166  | 3.2186927   | 0           | 12.2004702  |
| 126C | -   | -     | -     | - | - | 3.60312413  | 0           | 16.8560698  | 4.27227576  | 2.27005839  | 0.80405     | 7.99785754  | 21.51874774 | 13.50073478 | 10.55503422 | 42.35677164 |
| 126N | -   | -     | -     | - | - | 3.9067147   | 0           | 5.8955876   | 5.7903092   | 2.3688395   | 1.589748    | 4.8507999   | 38.8021814  | 9.3389582   | 1.907396    | 75.147698   |
| 132C | -   | -     | -     | - | - | 8.22143495  | 0           | 8.75780664  | 4.77856513  | 0.77106831  | 0.49516304  | 10.56849241 | 14.82463453 | 3.18592347  | 0.94446934  | 14.27249062 |
| 132N | -   | -     | -     | - | - | 8.144506414 | 0.009675926 | 0           | 3.448949145 | 1.641458071 | 0.565097472 | 6.956637584 | 29.6995457  | 10.28447528 | 6.816746544 | 57.5783446  |
| 143C | -   | -     | -     | - | - | 14.19561765 | 0.00621336  | 7.32874232  | 5.16770292  | 0.71473672  | 0.56883145  | 4.05328689  | 11.92872215 | 6.04340877  | 1.45911612  | 24.2737424  |
| 143N | -   | -     | -     | - | - | 0           | 0           | 0           | 3.309232    | 0.63106374  | 0.63745763  | 3.96650869  | 21.53483851 | 19.92188694 | 1.63514993  | 50.26101625 |
| 147C | -   | -     | -     | - | - | 5.6583669   | 0.0156854   | 19.9243101  | 7.4546738   | 3.9367135   | 0.8170313   | 6.7014859   | 19.8316699  | 8.1262436   | 27.6261443  | 38.211696   |
| 147N | -   | -     | -     | - | - | 8.328579081 | 0.008657783 | 2.356609308 | 3.086035999 | 1.242390417 | 0.601296276 | 2.754349276 | 22.81898378 | 20.43026109 | 7.11603595  | 69.96119394 |
| 149C | -   | -     | -     | - | - | 4.25888697  | 0           | 8.35516189  | 13.46619499 | 0.40330388  | 0.54786947  | 2.94505219  | 20.25440651 | 11.00949381 | 1.66347115  | 28.90079238 |
| 152N | -   | -     | -     | - | - | 2.68825932  | 0           | 0           | 2.65625623  | 0.56628866  | 0.43757022  | 7.60013291  | 24.5694642  | 9.23587231  | 1.05000246  | 39.03868384 |

|      |   |   |   |   |   |             |             |             |             |             |             |             |             |             |             |             |
|------|---|---|---|---|---|-------------|-------------|-------------|-------------|-------------|-------------|-------------|-------------|-------------|-------------|-------------|
| 153C | - | - | - | - | - | 10.3400987  | 0           | 4.255677    | 1.8576368   | 0.7720779   | 0.3948543   | 3.5015064   | 16.0116633  | 3.0832042   | 0           | 17.3508155  |
| 153N | - | - | - | - | - | 2.7948925   | 0           | 0           | 2.76162     | 0.6211595   | 0.1834383   | 4.9651957   | 33.4408443  | 13.0256717  | 0           | 21.3384429  |
| 156N | - | - | - | - | - | 2.94944024  | 0           | 0           | 0           | 0.14250162  | 0.01935818  | 3.95798589  | 21.98269948 | 15.98683533 | 0           | 15.57459415 |
| 158C | - | - | - | - | - | 12.5784657  | 12.5944715  | 17.0838434  | 0           | 1.0574434   | 0.8255675   | 7.7850425   | 14.6499534  | 8.8108234   | 0           | 40.9734719  |
| 158N | - | - | - | - | - | 3.36765524  | 1.56554381  | 0.50820979  | 1.33102564  | 0.29287368  | 0.14145963  | 3.96274976  | 23.18490507 | 11.43897524 | 0           | 29.96609258 |
| 162C | - | - | - | - | - | 3.43721762  | 0           | 1.29676847  | 1.69814918  | 0.61860513  | 0.21431647  | 6.38535358  | 18.29275025 | 7.18955189  | 4.19542739  | 22.68789374 |
| 164C | - | - | - | - | - | 11.98662294 | 0.34889174  | 13.15556633 | 11.84392505 | 0.65283895  | 0.67229043  | 11.71927824 | 12.95589965 | 6.5728267   | 1.06405316  | 31.2397743  |
| 171N | - | - | - | - | - | 2.328844016 | 0.011303992 | 0.851557472 | 2.68617854  | 0.203420414 | 0.044033855 | 3.966329893 | 25.43007281 | 14.09628476 | 1.482544311 | 13.31080125 |
| 175C | - | - | - | - | - | 8.3739947   | 0.7080062   | 12.6371192  | 3.6774686   | 0.512478    | 0.1465637   | 14.6455503  | 20.4543511  | 6.5950583   | 8.1769595   | 32.6196292  |
| 178C | - | - | - | - | - | 6.5509892   | 0           | 8.6502834   | 0           | 0.5697176   | 0.3224728   | 15.86146    | 22.2801938  | 5.8270018   | 6.3968482   | 25.587393   |
| 179C | - | - | - | - | - | 4.95127167  | 0.00823517  | 8.21911098  | 6.84925915  | 0.88989734  | 0.36396506  | 21.60235843 | 20.58381915 | 4.7068586   | 1.93390847  | 23.56364198 |
| 179N | - | - | - | - | - | 11.0694538  | 0           | 2.08810151  | 1.36720932  | 0.57492987  | 0.94448368  | 4.41408801  | 23.85994771 | 15.73069107 | 4.05337353  | 54.12368662 |
| 180C | - | - | - | - | - | 15.216511   | 0           | 9.3287587   | 2.8191304   | 0.5054381   | 0.574259    | 12.7350727  | 15.2456109  | 7.0846465   | 4.6432736   | 24.893356   |
| 180N | - | - | - | - | - | 5.2240648   | 0           | 0           | 7.7428104   | 0.5552793   | 0.7886082   | 7.0852506   | 26.0699263  | 22.5075666  | 5.1011456   | 60.4956253  |
| 182C | - | - | - | - | - | 12.6870418  | 0           | 13.0540224  | 10.2567319  | 1.5435748   | 1.4685689   | 5.3758337   | 21.2317615  | 16.5426727  | 2.2524588   | 37.7778885  |
| 182N | - | - | - | - | - | 5.39648436  | 0           | 0           | 0           | 0.6518252   | 0.37780227  | 3.0582148   | 20.36872222 | 14.75027009 | 7.026011    | 59.90868121 |
| 183C | - | - | - | - | - | 6.165981793 | 0.005697516 | 3.618621638 | 4.061718165 | 0.261497194 | 0.125904912 | 2.682884035 | 30.24400784 | 7.769770314 | 2.006966623 | 16.53636577 |
| 183N | - | - | - | - | - | 1.2719776   | 0.01322255  | 0           | 3.14208751  | 0.1505656   | 0.05843895  | 2.47838028  | 29.29985889 | 16.33464597 | 1.86307307  | 16.7676576  |
| 185C | - | - | - | - | - | 8.23556903  | 1.80353777  | 2.07137039  | 8.13752654  | 0.90190643  | 0.14414091  | 13.52945725 | 15.63115603 | 5.34144408  | 2.68059698  | 21.60092711 |



| MIR4645     | HOXA13      | TRG.AS1     | HOXA10      | NEAT1       | HOXA3       | MIR570      | SNHG1       | MIR4668     | HOXA9       | MIR4701     | SNHG5       | MIR4768     | y      |
|-------------|-------------|-------------|-------------|-------------|-------------|-------------|-------------|-------------|-------------|-------------|-------------|-------------|--------|
| 7.852192    | 0           | 1.35417     | 0           | 50.464568   | 5.441007    | 42.073987   | 11.710867   | 0           | 0.19961     | 0           | 12.713441   | 20.42631    | tumor  |
| 0           | 0.14499851  | 0.89281168  | 4.32689728  | 64.31377382 | 4.32441402  | 20.90744051 | 15.2165441  | 2.63379445  | 9.92129241  | 2.92643828  | 25.27273776 | 0           | tumor  |
| 0           | 0           | 1.394679    | 2.898479    | 32.087063   | 3.562843    | 18.842269   | 10.21877    | 2.373636    | 5.924296    | 1.758249    | 5.292683    | 14.968878   | tumor  |
| 0           | 0.03722556  | 0.38966061  | 0.89378508  | 41.56727221 | 1.86866969  | 5.85554276  | 7.66188521  | 1.35235154  | 0.71881346  | 0           | 45.70599722 | 23.02652628 | tumor  |
| 0           | 0.03590378  | 2.12230443  | 0.09851989  | 154.5182218 | 1.5266693   | 30.12067806 | 19.05798494 | 2.60866587  | 0.48228884  | 0           | 30.3255073  | 7.40297071  | tumor  |
| 0           | 0.07363864  | 0.84638674  | 0.26941903  | 209.7754302 | 9.13266227  | 48.90719234 | 28.11937404 | 0           | 1.77227068  | 0           | 12.24292053 | 26.99287429 | tumor  |
| 0           | 0.27054453  | 0.35538066  | 1.163052    | 16.4068732  | 3.28073049  | 6.61988074  | 5.5684346   | 0           | 2.66506164  | 0           | 54.50113493 | 19.83408284 | tumor  |
| 0           | 0.03671084  | 4.52085576  | 3.24868671  | 16.20510448 | 1.62602772  | 7.69943682  | 14.01826377 | 0           | 4.2840668   | 0           | 59.34132876 | 0           | tumor  |
| 2.99629633  | 0.06048363  | 0.52138942  | 3.46456025  | 35.34310092 | 3.96490862  | 11.89251637 | 10.89281886 | 1.09864199  | 4.72245582  | 2.44142664  | 40.65447215 | 14.54958309 | tumor  |
| 1.15315257  | 0.06983307  | 1.33296619  | 1.77250158  | 38.18162267 | 4.45407189  | 9.15389155  | 11.7728404  | 2.53693566  | 2.6969075   | 0           | 24.05730504 | 0           | tumor  |
| 2.2245104   | 0           | 0.8087415   | 5.1289156   | 47.2776116  | 3.659645    | 16.7755602  | 8.9383148   | 0           | 5.1459703   | 1.359423    | 23.3573589  | 3.4720398   | tumor  |
| 0.8945898   | 0.2708746   | 3.1022554   | 1.133501    | 18.722298   | 0.7358655   | 6.3912445   | 4.4565147   | 0.9840488   | 1.6828566   | 0           | 25.2950543  | 0           | tumor  |
| 0           | 0.09500401  | 0.35098577  | 5.01829802  | 27.50537053 | 2.24426572  | 2.49067221  | 8.29759889  | 0           | 4.62612145  | 0           | 45.30990957 | 0           | tumor  |
| 0           | 0           | 0.708914427 | 0.552865284 | 51.4075056  | 8.941195563 | 21.1285733  | 14.88852417 | 4.182595122 | 0.193319022 | 0           | 54.22852838 | 0           | tumor  |
| 6.37656038  | 2.07557918  | 0.35665507  | 3.97352427  | 22.16993952 | 4.96012285  | 7.59270849  | 24.31445626 | 3.50710821  | 12.3194557  | 0           | 22.05436335 | 13.27013916 | tumor  |
| 1.567481    | 0.5695448   | 1.1689689   | 5.4047862   | 14.3242719  | 3.5597764   | 3.7328672   | 8.6119645   | 0           | 6.3754924   | 1.9158102   | 32.225929   | 0           | tumor  |
| 5.6194672   | 0.2552294   | 0.785773    | 4.7273559   | 20.3644289  | 9.3453332   | 8.9216284   | 12.1538184  | 3.090707    | 11.4281671  | 0           | 24.6238858  | 5.8472834   | tumor  |
| 3.90958202  | 0.0473516   | 0.6122803   | 4.011672    | 7.45751869  | 2.72653851  | 4.96557222  | 3.17388113  | 0           | 4.88975257  | 0           | 14.91182309 | 0           | tumor  |
| 0           | 0.2176725   | 0.8309818   | 2.6878176   | 11.3445898  | 2.4681814   | 3.4239655   | 5.6592061   | 0           | 5.2996672   | 0           | 11.0153489  | 0           | tumor  |
| 0           | 0.11587373  | 0.24971771  | 3.81548721  | 2.89593351  | 2.30956985  | 3.03780307  | 3.35383649  | 0           | 3.64807153  | 0           | 34.01219558 | 0           | tumor  |
| 1.66670063  | 0.08831613  | 0.63701863  | 2.40608266  | 2.76491337  | 3.50196794  | 1.32305102  | 5.43275182  | 0           | 2.24556133  | 2.03707855  | 32.95670835 | 0           | tumor  |
| 1.79149561  | 0.05424505  | 0.36740842  | 3.31187467  | 14.89907117 | 3.31568144  | 11.37692057 | 4.38883037  | 0           | 3.09682107  | 0           | 26.36460862 | 0.93206191  | tumor  |
| 1.89249538  | 0.02865162  | 0.5821829   | 4.02927429  | 14.21570178 | 2.82577776  | 8.26259581  | 5.43160282  | 1.04087246  | 4.54629998  | 0           | 27.2511884  | 0           | tumor  |
| 0.8185532   | 0           | 2.6249196   | 0.9521449   | 11.657812   | 0.5415834   | 5.1982345   | 4.0441669   | 0           | 0.5202096   | 0           | 6.9480339   | 0           | tumor  |
| 2.247917318 | 0.15314655  | 0.230506776 | 3.035021899 | 2.980240538 | 1.386807328 | 9.814360663 | 2.465467357 | 0           | 2.342910193 | 0           | 39.6792807  | 0           | tumor  |
| 2.3667668   | 0.0716638   | 0.3971355   | 4.0803903   | 28.4964259  | 3.0895486   | 18.7877368  | 6.8413173   | 0           | 5.8360454   | 0           | 18.9154988  | 0           | tumor  |
| 0           | 0.06955022  | 0.5995465   | 2.59232024  | 22.51062248 | 2.23170718  | 8.50902763  | 4.36357902  | 0           | 2.04368359  | 0.93580009  | 26.01718513 | 0           | tumor  |
| 0           | 0.0991048   | 0.9763622   | 5.9487607   | 14.6064481  | 4.7408043   | 24.6827136  | 8.0854184   | 0           | 12.6885385  | 0           | 39.7338405  | 1.7028615   | tumor  |
| 0           | 0.4194647   | 0.7194959   | 4.3779498   | 9.5680207   | 2.1764307   | 2.3564774   | 3.1036991   | 0           | 3.4713114   | 1.209409    | 7.82653     | 0           | tumor  |
| 0           | 0.7460608   | 0.2296892   | 2.2007284   | 6.1999431   | 2.9079738   | 0           | 10.7085546  | 0           | 2.1296107   | 0           | 69.8051222  | 0           | tumor  |
| 0           | 0           | 0.5920305   | 6.8233051   | 14.428104   | 2.2517488   | 3.4768374   | 3.5467259   | 0           | 8.183596    | 1.3383065   | 27.3701394  | 0           | tumor  |
| 0           | 0.2760633   | 0.7649225   | 5.9654467   | 28.9467055  | 3.5460123   | 12.6654701  | 6.9623475   | 0           | 9.3287104   | 0           | 36.6844029  | 0           | tumor  |
| 0.144886703 | 0.037815478 | 0.104875648 | 2.565561678 | 16.64023356 | 2.003103748 | 4.323002243 | 2.813306963 | 0           | 6.571072478 | 0.705768033 | 15.80036012 | 1.131525938 | normal |
| 4.65575616  | 0.21145884  | 0.69441787  | 4.40017311  | 32.01985205 | 11.57235443 | 31.41435471 | 9.68771626  | 0           | 1.53859753  | 2.84518432  | 35.09230381 | 0           | tumor  |
| 0.87847551  | 0.09309837  | 1.26113349  | 3.26626058  | 15.82695157 | 3.11036638  | 5.57877231  | 5.54683845  | 1.93264612  | 3.61772978  | 1.07369229  | 13.33968521 | 0           | tumor  |
| 0           | 0           | 0.3065233   | 0.6830005   | 22.6309191  | 1.5434724   | 6.525471    | 14.4086777  | 0           | 1.0448509   | 0           | 53.4649539  | 0           | tumor  |
| 0           | 0.03101838  | 0.11459528  | 1.34055145  | 42.70531014 | 1.86849384  | 10.57151286 | 3.94818769  | 0           | 5.70309185  | 1.25205952  | 12.76078987 | 2.13188513  | normal |
| 0.65357368  | 0.18800202  | 0.87733959  | 6.92361439  | 6.49207339  | 3.44773019  | 2.07526489  | 2.6797217   | 0           | 9.81914084  | 0           | 21.30804594 | 0.68006991  | tumor  |
| 4.633377596 | 0.303972406 | 1.454147601 | 1.090745666 | 21.72452441 | 2.306107854 | 17.16419604 | 7.994714582 | 0           | 2.061233513 | 1.887672354 | 22.32473208 | 0.803536205 | tumor  |
| 0           | 0.01967434  | 0.31497052  | 1.61959068  | 7.65190495  | 1.13867204  | 11.34743109 | 10.09695056 | 0           | 1.65176148  | 0           | 58.19739788 | 0           | tumor  |
| 0           | 0.08095736  | 0.61479893  | 0.81453833  | 11.47515348 | 2.05587695  | 1.41494544  | 4.12918451  | 0           | 0.67967832  | 0           | 24.19308561 | 0           | tumor  |
| 0           | 0           | 0.18144566  | 2.147845256 | 10.08426275 | 2.240628463 | 0           | 2.34427696  | 0           | 9.030051505 | 0           | 16.72941648 | 1.265828675 | normal |
| 0           | 0.03413057  | 0.18913953  | 8.78008109  | 18.71826233 | 0.82641783  | 4.47391898  | 7.60256531  | 0           | 12.5506056  | 0           | 7.67291517  | 0           | tumor  |
| 0           | 0.09014066  | 0           | 2.84447646  | 7.86343543  | 2.60848986  | 0           | 3.11251671  | 0           | 6.62179724  | 0           | 17.92636101 | 0           | normal |
| 0           | 0.03660198  | 0.18029798  | 8.63747481  | 17.70243573 | 4.77715338  | 8.63618054  | 3.96501958  | 0           | 8.02032877  | 0           | 12.7258822  | 0           | tumor  |
| 2.0295674   | 1.3827076   | 1.2297802   | 1.6230517   | 7.9727401   | 0.9799049   | 4.8332997   | 3.2037553   | 1.1162621   | 2.2443169   | 0           | 5.4534636   | 0           | tumor  |
| 1.55355482  | 0.04704039  | 1.18754784  | 2.96881099  | 27.40621644 | 2.6391671   | 6.1661712   | 10.5896931  | 3.41782061  | 5.1933045   | 1.89878923  | 49.34371463 | 0           | tumor  |
| 0           | 0.1275098   | 0.353307    | 3.498865    | 58.280008   | 3.5769212   | 21.7285831  | 5.2229946   | 0           | 10.4374673  | 0           | 20.4836852  | 0           | normal |
| 1.04259603  | 0.09470691  | 0.38876462  | 0.24904742  | 8.22827484  | 2.74994993  | 7.86246387  | 6.90372892  | 1.14685563  | 0.50357147  | 0           | 36.9505884  | 0           | tumor  |
| 0           | 0.037975059 | 0           | 3.178206171 | 48.21954182 | 5.068497489 | 15.92916718 | 6.427753997 | 0           | 7.874853841 | 6.131465146 | 16.86701543 | 0           | normal |
| 3.22142519  | 0.73156628  | 0.72072564  | 3.12822372  | 43.25916864 | 0.9072883   | 3.83582072  | 7.13242064  | 0.88589193  | 4.68829568  | 0           | 55.13202881 | 0           | tumor  |
| 0           | 0           | 0.06730641  | 2.88698578  | 61.9269853  | 1.83982847  | 5.73145336  | 4.36649462  | 0           | 7.0663957   | 2.20615467  | 19.1021094  | 0           | normal |
| 0           | 0           | 1.7057305   | 3.2095116   | 31.8638438  | 2.2540607   | 0           | 11.5035382  | 0           | 4.6514802   | 2.4848913   | 57.3748413  | 0           | tumor  |
| 1.122194909 | 0.016989581 | 0.115072529 | 2.109526631 | 64.27825181 | 2.217416484 | 7.126516121 | 4.290543127 | 0           | 5.505757193 | 2.057357333 | 18.1539326  | 2.335378594 | normal |
| 3.67259863  | 0.05560167  | 1.74604054  | 4.80598219  | 14.84315734 | 5.91061508  | 0.72884045  | 10.69121231 | 0           | 8.21575713  | 0           | 28.92171423 | 0.95537194  | tumor  |
| 0.57954681  | 0.03509643  | 0.11885621  | 2.61225997  | 22.1684866  | 2.10378455  | 4.60052626  | 2.54253792  | 0           | 6.93906382  | 0.708335    | 18.09600703 | 3.01520978  | normal |

|             |             |             |             |             |             |             |             |            |             |            |             |                    |
|-------------|-------------|-------------|-------------|-------------|-------------|-------------|-------------|------------|-------------|------------|-------------|--------------------|
| 1.0132564   | 0           | 0.3211508   | 3.7463427   | 14.3862207  | 2.3917181   | 11.2607261  | 7.0002638   | 0          | 6.5425121   | 2.476849   | 31.6383335  | 0 tumor            |
| 0           | 0           | 0.1872285   | 3.4209223   | 18.1298707  | 3.070747    | 7.9716865   | 3.952734    | 0          | 6.6118415   | 1.2273867  | 15.858064   | 0 normal           |
| 0           | 0.07219924  | 0.05927446  | 1.46934955  | 3.05372712  | 0.83856299  | 1.26187392  | 1.31982739  | 0          | 4.88960521  | 0          | 19.82347921 | 0 normal           |
| 0           | 0           | 0.5055751   | 0.4506124   | 31.9068829  | 3.4428657   | 8.6104136   | 21.5139987  | 2.9828933  | 0.5514758   | 3.3143259  | 20.4019652  | 0 tumor            |
| 0           | 0.04396624  | 0.05414342  | 2.75971489  | 23.20884983 | 1.99932045  | 3.45792229  | 3.43812854  | 0          | 7.84377938  | 0.88735043 | 9.42389022  | 1.51089397 normal  |
| 1.85252638  | 0.05609301  | 0.69077255  | 2.27030681  | 12.05151121 | 2.2857577   | 13.97034068 | 4.74722215  | 1.01888951 | 3.57906384  | 0          | 24.35269913 | 0 tumor            |
| 4.69841655  | 0.03556607  | 0.41608858  | 3.83053397  | 21.96061398 | 0.92418923  | 8.39175945  | 22.70744967 | 0          | 8.39052813  | 0          | 42.40598399 | 0 tumor            |
| 0           | 0.010378895 | 0.212145875 | 2.704383793 | 8.588396755 | 1.972311767 | 1.3604915   | 2.704031625 | 0          | 8.558142388 | 0          | 17.55615765 | 0.632914338 normal |
| 1.002946    | 0           | 0.8040567   | 3.2915675   | 12.9644214  | 1.9369481   | 1.592306    | 8.7795156   | 0          | 5.2011473   | 0          | 50.5816452  | 0 tumor            |
| 1.765364    | 0.267269    | 0.1974814   | 0.6600471   | 18.9626779  | 2.1466432   | 15.4150853  | 10.640125   | 0          | 0.9872983   | 2.1576671  | 44.1758006  | 0 tumor            |
| 2.13483402  | 0.06464106  | 0.61693085  | 4.83346694  | 13.33931351 | 4.90550748  | 9.32064132  | 16.49949328 | 0          | 4.66717428  | 0          | 40.03654274 | 0 tumor            |
| 0           | 0.04516146  | 0.11123059  | 2.26159363  | 54.70638863 | 2.66710597  | 11.83975085 | 3.69976453  | 0          | 6.82476229  | 0          | 9.08406367  | 0 normal           |
| 4.1005533   | 0           | 0.6498334   | 0.1703494   | 20.2097732  | 2.2547805   | 8.1376959   | 6.5149232   | 0          | 0.2345397   | 0          | 55.1758503  | 0 tumor            |
| 0           | 0           | 0           | 1.1111883   | 59.4489489  | 2.0139219   | 4.4700761   | 4.0981648   | 0          | 6.5132654   | 0          | 19.0882168  | 0 normal           |
| 13.6756425  | 0           | 0.7649088   | 5.6554518   | 29.4626692  | 4.7798054   | 10.8559224  | 15.1393295  | 0          | 14.632802   | 0          | 33.5087504  | 0 tumor            |
| 1.93899654  | 0.05871126  | 0           | 1.6513116   | 26.05436648 | 1.24823465  | 4.61761032  | 4.29304985  | 2.1328962  | 5.76705839  | 0          | 13.30579124 | 6.05281353 normal  |
| 0.738494212 | 0.279512654 | 1.748604091 | 3.144626688 | 10.7149292  | 2.443067823 | 4.103591548 | 7.539483239 | 0          | 2.853527981 | 0          | 24.91109609 | 0.768433166 tumor  |
| 0           | 0.02075779  | 0.24284609  | 3.26092233  | 7.09253076  | 1.70399507  | 2.720983    | 3.06378629  | 0          | 8.08623327  | 0          | 18.38289882 | 0 normal           |
| 0           | 0.08959919  | 0.49652704  | 5.90063969  | 18.57473446 | 3.28071205  | 9.39590694  | 8.79615489  | 3.25501062 | 6.16829348  | 0          | 38.41005728 | 0 tumor            |
