# Supplementary material for: The Diagnostic and Prognostic Values of HOXA Gene Family in Kidney Clear Cell Renal Cell Carcinoma
Source: Hindawi journal article supplement (doi:10.1155/2022/1762637), 2022-03-16
Supplement: f1 [file 1762637.f1.zip]

| Gene_name | Ensemble        | Location                | Alteration    | Role                                                                                                                                                     | Ref.                                                                                                                                                                                                                  |
|-----------|-----------------|-------------------------|---------------|----------------------------------------------------------------------------------------------------------------------------------------------------------|-----------------------------------------------------------------------------------------------------------------------------------------------------------------------------------------------------------------------|
| HOXA1     | ENSG00000105991 | Chr 7:27092993-27096000 | Unknown       | -                                                                                                                                                        | -                                                                                                                                                                                                                     |
| HOXA2     | ENSG00000105996 | Chr 7:27100354-27102686 | Downregulated | -                                                                                                                                                        | -                                                                                                                                                                                                                     |
| HOXA3     | ENSG00000105997 | Chr 7:27106184-27152583 | Upregulated   | Increase cell invasion and metastasis through partially the FAK/YAP signaling pathway                                                                    | He C, Chen ZY, Li Y, et al. miR-10b suppresses cell invasion and metastasis through targeting HOXA3 regulated by FAK/YAP signaling pathway in clear-cell renal cell carcinoma. BMC Nephrol. 2019 Apr 11;20(1):127.    |
| HOXA4     | ENSG00000197576 | Chr 7:27128507-27130780 | Upregulated   | -                                                                                                                                                        | -                                                                                                                                                                                                                     |
| HOXA5     | ENSG00000106004 | Chr 7:27141052-27143681 | Downregulated | Show high methylation level and may initiate cancer and promote progression                                                                              | Yoo KH, Park YK, Kim HS, et al. Epigenetic inactivation of HOXA5 and MSH2 gene in clear cell renal cell carcinoma. Pathol Int. 2010 Oct;60(10):661-6.                                                                 |
| HOXA6     | ENSG00000106006 | Chr 7:27145396-27150603 | Downregulated | Inhibit cell proliferation and induce apoptosis by suppressing the PI3K/Akt signaling pathway                                                            | Wu F, Wu S, Tong H, et al. HOXA6 inhibits cell proliferation and induces apoptosis by suppressing the PI3K/Akt signaling pathway in clear cell renal cell carcinoma. Int J Oncol. 2019 Jun;54(6):2095-2105.           |
| HOXA7     | ENSG00000122592 | Chr 7:27153716-27157936 | Downregulated | -                                                                                                                                                        | -                                                                                                                                                                                                                     |
| HOXA9     | ENSG00000078399 | Chr 7:27162438-27175180 | Downregulated | Show high promoter methylation level and its expression level is related to tumor aggressiveness                                                         | Pires-Luis AS, Costa-Pinheiro P, Ferreira MJ, et al. Identification of clear cell renal cell carcinoma and oncocytoma using a three-gene promoter methylation panel. J Transl Med. 2017 Jun 29;15(1):149.             |
| HOXA10    | ENSG00000253293 | Chr 7:27170592-27180261 | Unknown       | -                                                                                                                                                        | -                                                                                                                                                                                                                     |
| HOXA11    | ENSG00000005073 | Chr 7:27181157-27185232 | Downregulated | Function as a tumor suppressor, significantly inhibit cell proliferation, colony formation, cell migration and invasion and induce KIRC cells apoptosis. | Wang L, Cui Y, Sheng J, et al. Epigenetic inactivation of HOXA11, a novel functional tumor suppressor for renal cell carcinoma, is associated with RCC TNM classification. Oncotarget. 2017 Mar 28;8(13):21861-21870. |
| HOXA13    | ENSG00000106031 | Chr 7:27193503-27200091 | Upregulated   | Function as a novel oncogene, promote cell proliferation, increase the protein level of p53 and decrease the protein level of cyclin D1 in KIRC cells.   | Cui Y, Yan M, Zhang C, et al. Comprehensive analysis of the HOXA gene family identifies HOXA13 as a novel oncogenic gene in kidney renal clear cell carcinoma. J Cancer Res Clin Oncol. 2020                          |
