# Supplementary material for: The Diagnostic and Prognostic Values of HOXA Gene Family in Kidney Clear Cell Renal Cell Carcinoma
Source: Hindawi journal article supplement (doi:10.1155/2022/1762637), 2022-03-16
Supplement: f1 [file 1762637.f1.zip]

| ###DGldb   |          |                           |                   |                                                                  |
|------------|----------|---------------------------|-------------------|------------------------------------------------------------------|
| match_term | gene     | drug                      | interaction_types | sources                                                          |
| UMOD       | UMOD     | CYCLOSPORINE              |                   | PharmGKB                                                         |
| SLC12A1    | SLC12A1  | ETHACRYNATE SODIUM        | inhibitor         | ChemblInteractions                                               |
| SLC12A1    | SLC12A1  | TORSEMIDE                 | inhibitor         | TdgClinicalTrial ChemblInteractions TEND TTD                     |
| SLC12A1    | SLC12A1  | HYDROFLUMETHIAZIDE        | inhibitor         | TdgClinicalTrial TEND TTD                                        |
| SLC12A1    | SLC12A1  | BUMETANIDE                | inhibitor         | TdgClinicalTrial ChemblInteractions TEND GuideToPharmacology TTD |
| SLC12A1    | SLC12A1  | CHLORTHALIDONE            | inhibitor         | TdgClinicalTrial TEND TTD                                        |
| SLC12A1    | SLC12A1  | FUROSEMIDE                | inhibitor         | TdgClinicalTrial ChemblInteractions TEND GuideToPharmacology TTD |
| SLC12A1    | SLC12A1  | METHYCLOTHIAZIDE          | inhibitor         | TdgClinicalTrial TEND TTD                                        |
| SLC12A1    | SLC12A1  | TRICHLORMETHIAZIDE        | inhibitor         | TdgClinicalTrial TEND TTD                                        |
| SLC12A1    | SLC12A1  | ALDOSTERONE               |                   | TTD                                                              |
| SLC12A1    | SLC12A1  | METOLAZONE                |                   | TdgClinicalTrial TEND                                            |
| SLC12A1    | SLC12A1  | BENDROFLUMETHIAZIDE       |                   | TTD                                                              |
| SLC12A1    | SLC12A1  | CHLORMERODRIN             | inducer           | TdgClinicalTrial TEND                                            |
| SLC12A1    | SLC12A1  | PIRETANIDE                | inhibitor         | GuideToPharmacology                                              |
| SLC12A1    | SLC12A1  | ETHACRYNIC ACID           | inhibitor         | ChemblInteractions                                               |
| KCNJ10     | KCNJ10   | CHLORPROPAMIDE            |                   | TTD                                                              |
| KCNJ10     | KCNJ10   | NORTRIPTYLINE             | blocker           | GuideToPharmacology                                              |
| KCNJ10     | KCNJ10   | TOLAZAMIDE                |                   | TTD                                                              |
| KCNJ10     | KCNJ10   | MITIGLINIDE               |                   | TTD                                                              |
| KCNJ10     | KCNJ10   | GLISOXEPIDE               |                   | TTD                                                              |
| KCNJ10     | KCNJ10   | GLIQUIDONE                |                   | TTD                                                              |
| KCNJ10     | KCNJ10   | GLYMIDINE                 |                   | TTD                                                              |
| KCNJ10     | KCNJ10   | GLIPIZIDE                 |                   | TTD                                                              |
| KNG1       | KNG1     | AVORALSTAT                |                   | TTD                                                              |
| PVT1       | PVT1     | GLIVEC                    |                   | NCI                                                              |
| ESRRB      | ESRRB    | DAIDZEIN                  | agonist           | GuideToPharmacology                                              |
| ESRRB      | ESRRB    | GENISTEIN                 | agonist           | GuideToPharmacology                                              |
| ESRRB      | ESRRB    | DIETHYLSTILBESTROL        | antagonist        | DTC GuideToPharmacology                                          |
| CA9        | CA9      | GIRENTUXIMAB              |                   | ChemblInteractions TTD                                           |
| CA9        | CA9      | ETHOXZOLAMIDE             | inhibitor         | ChemblInteractions                                               |
| CA9        | CA9      | CG250 177LU               |                   | ChemblInteractions                                               |
| CA9        | CA9      | CURCUMIN                  |                   | TTD                                                              |
| CA9        | CA9      | PHENOL                    |                   | TTD                                                              |
| CA9        | CA9      | INDISULAM                 |                   | TTD                                                              |
| CA9        | CA9      | CELECOXIB                 |                   | PharmGKB                                                         |
| CA9        | CA9      | SUNITINIB                 |                   | CGI                                                              |
| CA9        | CA9      | PARABEN                   |                   | TTD                                                              |
| CA9        | CA9      | CG250 111IN               |                   | ChemblInteractions                                               |
| CA9        | CA9      | SULFAMIDE                 |                   | TTD                                                              |
| CA9        | CA9      | IODINE I 124 GIRENTUXIMAB |                   | ChemblInteractions                                               |
| KCNJ1      | KCNJ1    | GLICLAZIDE                |                   | TdgClinicalTrial TEND                                            |
| KCNJ1      | KCNJ1    | GLYMIDINE                 | other/unknown     | TdgClinicalTrial TEND                                            |
| KCNJ1      | KCNJ1    | NATEGLINIDE               |                   | TEND                                                             |
| KCNJ1      | KCNJ1    | GLIMEPIRIDE               | inhibitor         | TdgClinicalTrial TEND                                            |
| KCNJ1      | KCNJ1    | GLYBURIDE                 |                   | TdgClinicalTrial TEND                                            |
| KCNJ1      | KCNJ1    | ACETOHEXAMIDE             | inhibitor         | TdgClinicalTrial TEND                                            |
| KCNJ1      | KCNJ1    | CHLORPROPAMIDE            |                   | TdgClinicalTrial TEND                                            |
| KCNJ1      | KCNJ1    | MINOXIDIL                 | inducer           | TdgClinicalTrial TEND                                            |
| KCNJ1      | KCNJ1    | REPAGLINIDE               |                   | TEND                                                             |
| KCNJ1      | KCNJ1    | TOLAZAMIDE                |                   | TdgClinicalTrial TEND                                            |
| KCNJ1      | KCNJ1    | GLIPIZIDE                 |                   | TdgClinicalTrial TEND                                            |
| KCNJ1      | KCNJ1    | TOLBUTAMIDE               | inhibitor         | TdgClinicalTrial TEND                                            |
| KCNJ1      | KCNJ1    | HYDROCHLOROTHIAZIDE       |                   | PharmGKB                                                         |
| KCNJ1      | KCNJ1    | MK-7145                   | blocker           | GuideToPharmacology                                              |
| SERPINA5   | SERPINA5 | GEMCITABINE               |                   | PharmGKB                                                         |
| SERPINA5   | SERPINA5 | THROMBIN                  |                   | NCI                                                              |
| SERPINA5   | SERPINA5 | HEPARIN                   |                   | NCI                                                              |
| SERPINA5   | SERPINA5 | CARBOPLATIN               |                   | PharmGKB                                                         |
| EGF        | EGF      | CETUXIMAB                 |                   | CIViC PharmGKB                                                   |

|        |        |                          |                                 |                                                                  |
|--------|--------|--------------------------|---------------------------------|------------------------------------------------------------------|
| EGF    | EGF    | NIMOTUZUMAB              |                                 | TdgClinicalTrial                                                 |
| EGF    | EGF    | PANITUMUMAB              |                                 | PharmGKB                                                         |
| CASR   | CASR   | CINACALCET HYDROCHLORIDE | positive modulator              | ChemblInteractions                                               |
| CASR   | CASR   | TECALCET HYDROCHLORIDE   | modulator                       | ChemblInteractions                                               |
| CASR   | CASR   | VELCALCETIDE             | agonist                         | ChemblInteractions GuideToPharmacology TTD                       |
| CASR   | CASR   | CINACALCET               | allosteric modulator agonist    | TdgClinicalTrial TEND GuideToPharmacology TTD                    |
| CASR   | CASR   | RONACALERET              | allosteric modulator antagonist | TdgClinicalTrial ChemblInteractions GuideToPharmacology          |
| CASR   | CASR   | TECALCET                 | allosteric modulator            | GuideToPharmacology                                              |
| CASR   | CASR   | ASP7991                  | positive modulator              | ChemblInteractions TTD                                           |
| CASR   | CASR   | CALINDOL                 | allosteric modulator            | GuideToPharmacology                                              |
| CASR   | CASR   | ENCALERET                | allosteric modulator            | GuideToPharmacology                                              |
| CASR   | CASR   | CHEMBL1084513            | allosteric modulator            | GuideToPharmacology                                              |
| CASR   | CASR   | ENCALERET SULFATE        |                                 | TTD                                                              |
| CASR   | CASR   | PAMIDRONIC ACID          |                                 | NCI                                                              |
| CASR   | CASR   | EVOCALCET                | agonist                         | GuideToPharmacology                                              |
| CASR   | CASR   | TRYPTOPHAN               | allosteric modulator            | GuideToPharmacology                                              |
| CASR   | CASR   | CHEMBL180672             |                                 | TdgClinicalTrial                                                 |
| CASR   | CASR   | SPERMINE                 | agonist                         | GuideToPharmacology                                              |
| SCNN1G | SCNN1G | TRIAMTERENE              | inhibitor blocker               | TdgClinicalTrial ChemblInteractions TEND PharmGKB                |
| SCNN1G | SCNN1G | AMILORIDE                | blocker inhibitor               | TdgClinicalTrial TEND PharmGKB                                   |
| SCNN1G | SCNN1G | AMILORIDE HYDROCHLORIDE  | blocker                         | ChemblInteractions                                               |
| SCNN1G | SCNN1G | P-1037                   | blocker                         | ChemblInteractions                                               |
| PTGER1 | PTGER1 | CLOPROSTENOL             | agonist                         | GuideToPharmacology                                              |
| PTGER1 | PTGER1 | DINOPROSTONE             | agonist                         | DTC TdgClinicalTrial ChemblInteractions TEND GuideToPharmacology |
| PTGER1 | PTGER1 | EOPROSTENOL              | agonist                         | GuideToPharmacology                                              |
| PTGER1 | PTGER1 | CICAPROST                | agonist                         | GuideToPharmacology                                              |
| PTGER1 | PTGER1 | ECRAPROST                |                                 | TTD                                                              |
| PTGER1 | PTGER1 | ALPROSTADIL              | agonist                         | TdgClinicalTrial ChemblInteractions TEND GuideToPharmacology     |
| PTGER1 | PTGER1 | CAFFEINE                 |                                 | NCI                                                              |
| PTGER1 | PTGER1 | ILOPROST                 | agonist                         | TdgClinicalTrial TEND GuideToPharmacology                        |
| PTGER1 | PTGER1 | CHEMBL234940             | antagonist                      | GuideToPharmacology                                              |
| PTGER1 | PTGER1 | IBUPROFEN                |                                 | NCI                                                              |
| PTGER1 | PTGER1 | SULPROSTONE              | agonist                         | GuideToPharmacology                                              |
| PTGER1 | PTGER1 | CARBACYCLIN              | agonist                         | GuideToPharmacology                                              |
| PTGER1 | PTGER1 | INTERLEUKIN-10           |                                 | NCI                                                              |
| PTGER1 | PTGER1 | BIMATOPROST              | agonist                         | TdgClinicalTrial                                                 |
| PTGER1 | PTGER1 | CHEMBL112816             | antagonist                      | GuideToPharmacology                                              |
| PTGER1 | PTGER1 | TREPROSTINIL             | agonist                         | GuideToPharmacology                                              |
| PTGER1 | PTGER1 | BUTAPROST                |                                 | TTD                                                              |
| PTGER1 | PTGER1 | ENPROSTIL                | agonist                         | GuideToPharmacology                                              |
| GABRD  | GABRD  | CLORAZEPIC ACID          |                                 | TdgClinicalTrial TEND                                            |
| GABRD  | GABRD  | DIAZEPAM                 | potentiator positive modulator  | TdgClinicalTrial ChemblInteractions TEND                         |
| GABRD  | GABRD  | TRIAZOLAM                | positive modulator potentiator  | TdgClinicalTrial ChemblInteractions TEND                         |
| GABRD  | GABRD  | ENFLURANE                |                                 | ChemblInteractions                                               |
| GABRD  | GABRD  | HALAZEPAM                | positive modulator potentiator  | TdgClinicalTrial ChemblInteractions TEND                         |
| GABRD  | GABRD  | BROMAZEPAM               | potentiator                     | TdgClinicalTrial TEND                                            |
| GABRD  | GABRD  | QUAZEPAM                 | positive modulator potentiator  | TdgClinicalTrial ChemblInteractions TEND                         |
| GABRD  | GABRD  | PRAZEPAM                 | positive modulator potentiator  | TdgClinicalTrial ChemblInteractions TEND                         |
| GABRD  | GABRD  | CLOTIAZEPAM              | potentiator                     | TdgClinicalTrial TEND                                            |
| GABRD  | GABRD  | OXAZEPAM                 | positive modulator potentiator  | TdgClinicalTrial ChemblInteractions TEND                         |
| GABRD  | GABRD  | DESFLURANE               | positive modulator              | ChemblInteractions                                               |
| GABRD  | GABRD  | ESZOPICLONE              | positive modulator              | ChemblInteractions                                               |
| GABRD  | GABRD  | PENTOBARBITAL            | positive modulator              | ChemblInteractions                                               |
| GABRD  | GABRD  | FLUDIAZEPAM              | potentiator                     | TdgClinicalTrial TEND                                            |
| GABRD  | GABRD  | ALPRAZOLAM               | positive modulator              | TdgClinicalTrial ChemblInteractions TEND                         |
| GABRD  | GABRD  | MIDAZOLAM HYDROCHLORIDE  | positive modulator              | ChemblInteractions                                               |
| GABRD  | GABRD  | CLONAZEPAM               | positive modulator              | TdgClinicalTrial ChemblInteractions TEND                         |
| GABRD  | GABRD  | CHLORDIAZEPOXIDE         | positive modulator              | TdgClinicalTrial ChemblInteractions TEND                         |
| GABRD  | GABRD  | FLURAZEPAM               | potentiator                     | TdgClinicalTrial TEND                                            |
| GABRD  | GABRD  | THIAMYLAL SODIUM         | positive modulator              | ChemblInteractions                                               |
| GABRD  | GABRD  | TEMAZEPAM                | potentiator positive modulator  | TdgClinicalTrial ChemblInteractions TEND                         |

|        |        |                                |                                |                                                                   |
|--------|--------|--------------------------------|--------------------------------|-------------------------------------------------------------------|
| GABRD  | GABRD  | CLOBAZAM                       | positive modulator             | TdgClinicalTrial ChembllInteractions TEND                         |
| GABRD  | GABRD  | NITRAZEPAM                     | potentiator                    | TdgClinicalTrial TEND                                             |
| GABRD  | GABRD  | ESTAZOLAM                      | potentiator positive modulator | TdgClinicalTrial ChembllInteractions TEND                         |
| GABRD  | GABRD  | TALBUTAL                       | positive modulator             | ChembllInteractions                                               |
| GABRD  | GABRD  | TOPIRAMATE                     |                                | ChembllInteractions                                               |
| GABRD  | GABRD  | ADIPIPLON                      |                                | TdgClinicalTrial                                                  |
| GABRD  | GABRD  | GLUTETHIMIDE                   |                                | ChembllInteractions                                               |
| GABRD  | GABRD  | BUTABARBITAL SODIUM            | positive modulator             | ChembllInteractions                                               |
| GABRD  | GABRD  | ISOFLURANE                     | positive modulator             | ChembllInteractions                                               |
| GABRD  | GABRD  | METHARBITAL                    | positive modulator             | ChembllInteractions                                               |
| GABRD  | GABRD  | ADINAZOLAM                     | potentiator                    | TdgClinicalTrial TEND                                             |
| GABRD  | GABRD  | CINOLAZEPAM                    | potentiator                    | TdgClinicalTrial TEND                                             |
| GABRD  | GABRD  | GANAXOLONE                     |                                | TTD                                                               |
| GABRD  | GABRD  | BUTALBITAL                     | positive modulator             | ChembllInteractions                                               |
| GABRD  | GABRD  | FLUMAZENIL                     |                                | ChembllInteractions                                               |
| GABRD  | GABRD  | THIOPENTAL SODIUM              | positive modulator             | ChembllInteractions                                               |
| GABRD  | GABRD  | LORAZEPAM                      | positive modulator             | TdgClinicalTrial ChembllInteractions TEND                         |
| GABRD  | GABRD  | CLORAZEPATE DIPOTASSIUM        | positive modulator             | ChembllInteractions                                               |
| GABRD  | GABRD  | ETHCHLORVYNOL                  |                                | ChembllInteractions                                               |
| GABRD  | GABRD  | PICROTOXIN                     | blocker                        | GuideToPharmacology                                               |
| GABRD  | GABRD  | PF-06372865                    | agonist                        | ChembllInteractions                                               |
| GABRD  | GABRD  | GABOXADOL                      | agonist                        | GuideToPharmacology TTD                                           |
| GABRD  | GABRD  | BREXANOLONE                    |                                | TTD                                                               |
| GABRD  | GABRD  | AZIETOMIDATE                   |                                | DTC                                                               |
| GABRD  | GABRD  | OCINAPLON                      |                                | TdgClinicalTrial                                                  |
| GABRD  | GABRD  | SEVOFLURANE                    | positive modulator             | ChembllInteractions                                               |
| GABRD  | GABRD  | CHLORDIAZEPOXIDE HYDROCHLORIDE | positive modulator             | ChembllInteractions                                               |
| GABRD  | GABRD  | TRICLOFOS SODIUM               |                                | ChembllInteractions                                               |
| GABRD  | GABRD  | ETOMIDATE                      |                                | DTC ChembllInteractions                                           |
| GABRD  | GABRD  | METHYPRYLON                    | positive modulator             | ChembllInteractions                                               |
| GABRD  | GABRD  | HALOTHANE                      | positive modulator             | ChembllInteractions                                               |
| GABRD  | GABRD  | PRIMIDONE                      | positive modulator             | ChembllInteractions                                               |
| GABRD  | GABRD  | MIDAZOLAM                      | potentiator                    | TdgClinicalTrial TEND                                             |
| GABRD  | GABRD  | REMIMAZOLAM                    |                                | TdgClinicalTrial                                                  |
| GABRD  | GABRD  | METHOXYFLURANE                 |                                | ChembllInteractions                                               |
| GABRD  | GABRD  | SECOBARBITAL SODIUM            | positive modulator             | ChembllInteractions                                               |
| GABRD  | GABRD  | ACAMPROSATE CALCIUM            |                                | ChembllInteractions                                               |
| GABRD  | GABRD  | METHOHEXITAL SODIUM            | positive modulator             | ChembllInteractions                                               |
| GABRD  | GABRD  | PROPOFOL                       | positive modulator             | ChembllInteractions                                               |
| GABRD  | GABRD  | MEPROBAMATE                    | agonist                        | ChembllInteractions                                               |
| GABRD  | GABRD  | PENTOBARBITAL SODIUM           | positive modulator             | ChembllInteractions                                               |
| SCNN1B | SCNN1B | TRIAMTERENE                    | blocker inhibitor              | TdgClinicalTrial ChembllInteractions TEND PharmGKB                |
| SCNN1B | SCNN1B | AMILORIDE                      | blocker inhibitor              | TdgClinicalTrial TEND PharmGKB                                    |
| SCNN1B | SCNN1B | AMILORIDE HYDROCHLORIDE        | blocker                        | ChembllInteractions                                               |
| SCNN1B | SCNN1B | FARGLITAZAR                    |                                | PharmGKB                                                          |
| SCNN1B | SCNN1B | P-1037                         | blocker                        | ChembllInteractions                                               |
| SCNN1B | SCNN1B | GLYBURIDE                      |                                | PharmGKB                                                          |
| CA10   | CA10   | MONTELUKAST                    |                                | PharmGKB                                                          |
| ATP1A1 | ATP1A1 | ISTAROXIME                     |                                | TdgClinicalTrial                                                  |
| ATP1A1 | ATP1A1 | DIGOXIN                        | inhibitor                      | TdgClinicalTrial ChembllInteractions TEND GuideToPharmacology     |
| ATP1A1 | ATP1A1 | ACETYLDIGITOXIN                | inhibitor                      | TdgClinicalTrial ChembllInteractions TEND GuideToPharmacology TTD |
| ATP1A1 | ATP1A1 | ARTEMETHER                     |                                | TTD                                                               |
| ATP1A1 | ATP1A1 | ALMITRINE                      | binder                         | TdgClinicalTrial TEND TTD                                         |
| ATP1A1 | ATP1A1 | DESLANOSIDE                    | inhibitor                      | TdgClinicalTrial ChembllInteractions TEND GuideToPharmacology TTD |
| ATP1A1 | ATP1A1 | BEPRIDIL                       | inhibitor                      | TdgClinicalTrial TEND                                             |
| ATP1A1 | ATP1A1 | LUMEFANTRINE                   |                                | TTD                                                               |
| ATP1A1 | ATP1A1 | DIGITOXIN                      | inhibitor                      | TdgClinicalTrial ChembllInteractions TEND GuideToPharmacology     |
| ATP1A1 | ATP1A1 | OUABAIN                        | inhibitor                      | TdgClinicalTrial TEND TTD                                         |
| ATP1A1 | ATP1A1 | EPLERENONE                     |                                | PharmGKB                                                          |
| ATP1A1 | ATP1A1 | CHLOROPROCAINE                 |                                | TTD                                                               |
| ADH1C  | ADH1C  | FOMEPIZOLE                     | inhibitor                      | TdgClinicalTrial ChembllInteractions TEND                         |

|          |          |                         |           |                                             |
|----------|----------|-------------------------|-----------|---------------------------------------------|
| ADH1C    | ADH1C    | CYCLOPHOSPHAMIDE        |           | PharmGKB                                    |
| ADH1C    | ADH1C    | CISPLATIN               |           | PharmGKB                                    |
| ADH1C    | ADH1C    | ABACAVIR                |           | PharmGKB                                    |
| ADH1C    | ADH1C    | ALCOHOL                 |           | PharmGKB                                    |
| GPC3     | GPC3     | ERY-974                 |           | TTD                                         |
| GPC3     | GPC3     | CODRITUZUMAB            | antibody  | GuideToPharmacology TTD                     |
| TYRP1    | TYRP1    | FLANVOTUMAB             |           | ChEMBLInteractions TTD                      |
| CDKN2A   | CDKN2A   | RIGOSERTIB              |           | JAX-CKB                                     |
| CDKN2A   | CDKN2A   | ABEMACICLIB             |           | ClearityFoundationBiomarkers JAX-CKB OncoKB |
| CDKN2A   | CDKN2A   | ALVOCIDIB               |           | JAX-CKB                                     |
| CDKN2A   | CDKN2A   | PALBOCICLIB             |           | JAX-CKB CIViC OncoKB                        |
| CDKN2A   | CDKN2A   | SAPANISERTIB            |           | JAX-CKB                                     |
| CDKN2A   | CDKN2A   | MILCICLIB MALEATE       |           | JAX-CKB                                     |
| CDKN2A   | CDKN2A   | HMN-214                 |           | JAX-CKB                                     |
| CDKN2A   | CDKN2A   | ALECTINIB               |           | JAX-CKB                                     |
| CDKN2A   | CDKN2A   | TRAMETINIB              |           | JAX-CKB                                     |
| CDKN2A   | CDKN2A   | CARBOPLATIN             |           | JAX-CKB                                     |
| CDKN2A   | CDKN2A   | CRIZOTINIB              |           | JAX-CKB                                     |
| CDKN2A   | CDKN2A   | LETROZOLE               |           | CIViC                                       |
| CDKN2A   | CDKN2A   | RIBOCICLIB              |           | ClearityFoundationBiomarkers OncoKB         |
| CDKN2A   | CDKN2A   | PACLITAXEL              |           | JAX-CKB                                     |
| CDKN2A   | CDKN2A   | PF-00477736             |           | JAX-CKB                                     |
| CDKN2A   | CDKN2A   | IMATINIB                |           | JAX-CKB                                     |
| CDKN2A   | CDKN2A   | PANITUMUMAB             |           | CIViC                                       |
| CDKN2A   | CDKN2A   | GSK-461364              |           | JAX-CKB                                     |
| CDKN2A   | CDKN2A   | ILORASERTIB             |           | CGI                                         |
| CDKN2A   | CDKN2A   | GEMCITABINE             |           | JAX-CKB                                     |
| CDKN2A   | CDKN2A   | DABRAFENIB              |           | CIViC                                       |
| CDKN2A   | CDKN2A   | VEMURAFENIB             |           | CIViC                                       |
| NDUFA4L2 | NDUFA4L2 | NV-128                  | inhibitor | ChEMBLInteractions                          |
| NDUFA4L2 | NDUFA4L2 | METFORMIN HYDROCHLORIDE | inhibitor | ChEMBLInteractions                          |
| NDUFA4L2 | NDUFA4L2 | ME-344                  | inhibitor | ChEMBLInteractions                          |
| PIK3C2G  | PIK3C2G  | APITOLISIB              | inhibitor | MyCancerGenome                              |
| PIK3C2G  | PIK3C2G  | INFIGRATINIB            | inhibitor | MyCancerGenome                              |
| PIK3C2G  | PIK3C2G  | PILARALISIB             | inhibitor | MyCancerGenome                              |
| PIK3C2G  | PIK3C2G  | PF-04691502             | inhibitor | MyCancerGenome                              |
| PIK3C2G  | PIK3C2G  | DACTOLISIB              | inhibitor | MyCancerGenome                              |
| PIK3C2G  | PIK3C2G  | SONOLISIB               | inhibitor | MyCancerGenome                              |
| PIK3C2G  | PIK3C2G  | PI-103                  | inhibitor | MyCancerGenome                              |
| PIK3C2G  | PIK3C2G  | GSK-2636771             | inhibitor | MyCancerGenome                              |
| PIK3C2G  | PIK3C2G  | BUPARLISIB              | inhibitor | MyCancerGenome                              |
| PIK3C2G  | PIK3C2G  | QUERCETIN               | inhibitor | MyCancerGenome                              |
| PIK3C2G  | PIK3C2G  | COPANLISIB              | inhibitor | MyCancerGenome                              |
| PIK3C2G  | PIK3C2G  | VOXTALISIB              | inhibitor | MyCancerGenome                              |
| PIK3C2G  | PIK3C2G  | SAR-260301              | inhibitor | GuideToPharmacology                         |
| PIK3C2G  | PIK3C2G  | ALPELISIB               | inhibitor | MyCancerGenome                              |
| PIK3C2G  | PIK3C2G  | GEDATOLISIB             | inhibitor | MyCancerGenome                              |
| PIK3C2G  | PIK3C2G  | PICTILISIB              | inhibitor | MyCancerGenome                              |
| TMPRSS2  | TMPRSS2  | NAFAMOSTAT              | inhibitor | GuideToPharmacology                         |
| TMPRSS2  | TMPRSS2  | CAMOSTAT                | inhibitor | GuideToPharmacology                         |
| SLC4A1   | SLC4A1   | METOPROLOL              |           | PharmGKB                                    |
| SLC4A1   | SLC4A1   | ATENOLOL                |           | PharmGKB                                    |
| GATA3    | GATA3    | MERCAPTOPURINE          |           | PharmGKB                                    |
| GATA3    | GATA3    | PEGASPARGASE            |           | PharmGKB                                    |
| GATA3    | GATA3    | LEUCOVORIN              |           | PharmGKB                                    |
| GATA3    | GATA3    | VINCRISTINE             |           | PharmGKB                                    |
| GATA3    | GATA3    | THIOGUANINE             |           | PharmGKB                                    |
| GATA3    | GATA3    | ASPARAGINASE            |           | PharmGKB                                    |
| GATA3    | GATA3    | PREDNISONE              |           | PharmGKB                                    |
| GATA3    | GATA3    | METHOTREXATE            |           | PharmGKB                                    |
| GATA3    | GATA3    | DEXAMETHASONE           |           | PharmGKB                                    |

|         |         |                                      |                            |                                                                          |
|---------|---------|--------------------------------------|----------------------------|--------------------------------------------------------------------------|
| GATA3   | GATA3   | DOXORUBICIN                          |                            | PharmGKB                                                                 |
| GATA3   | GATA3   | CYCLOPHOSPHAMIDE                     |                            | PharmGKB                                                                 |
| GATA3   | GATA3   | DAUNORUBICIN                         |                            | PharmGKB                                                                 |
| GATA3   | GATA3   | CYTARABINE                           |                            | PharmGKB                                                                 |
| SOST    | SOST    | BLOSOZUMAB                           | inhibitor                  | ChemblInteractions                                                       |
| SOST    | SOST    | SETRUSUMAB                           |                            | TTD                                                                      |
| SOST    | SOST    | ROMOSOZUMAB                          | inhibitor                  | ChemblInteractions TTD                                                   |
| TRPV6   | TRPV6   | SOR-C13                              |                            | TTD                                                                      |
| CXCR4   | CXCR4   | BKT140                               | antagonist                 | TdgClinicalTrial ChemblInteractions GuideToPharmacology TTD              |
| CXCR4   | CXCR4   | PLERIXAFOR                           | partial agonist antagonist | DTC TdgClinicalTrial ChemblInteractions NCI TEND GuideToPharmacology TTD |
| CXCR4   | CXCR4   | BURIXAFOR                            | antagonist                 | TdgClinicalTrial ChemblInteractions TTD                                  |
| CXCR4   | CXCR4   | CHEMBL2347630                        |                            | DTC                                                                      |
| CXCR4   | CXCR4   | MSX-122                              | antagonist                 | TdgClinicalTrial ChemblInteractions TTD                                  |
| CXCR4   | CXCR4   | BEVACIZUMAB                          |                            | PharmGKB                                                                 |
| CXCR4   | CXCR4   | MAVORIXAFOR                          | antagonist                 | DTC TdgClinicalTrial GuideToPharmacology TTD                             |
| CXCR4   | CXCR4   | POL6326                              | antagonist                 | ChemblInteractions TTD                                                   |
| CXCR4   | CXCR4   | ULOCUPLUMAB                          | antibody                   | GuideToPharmacology TTD                                                  |
| CXCR4   | CXCR4   | CTCE-9908                            | antagonist                 | ChemblInteractions TTD                                                   |
| CXCR4   | CXCR4   | CHEMBL2347632                        |                            | DTC                                                                      |
| CXCR4   | CXCR4   | CHEMBL2347631                        |                            | DTC                                                                      |
| CXCR4   | CXCR4   | CHEMBL1242210                        |                            | DTC                                                                      |
| CXCR4   | CXCR4   | CHEMBL2347633                        |                            | DTC                                                                      |
| CXCR4   | CXCR4   | CHEMBL1221944                        |                            | DTC                                                                      |
| CXCR4   | CXCR4   | USL-311                              |                            | TTD                                                                      |
| CXCR4   | CXCR4   | PF-06747143                          |                            | TTD                                                                      |
| CXCR4   | CXCR4   | BALIXAFORTIDE                        |                            | TTD                                                                      |
| CXCR4   | CXCR4   | CHEMBL2062277                        |                            | DTC                                                                      |
| CXCR4   | CXCR4   | CISPLATIN                            |                            | CIViC                                                                    |
| TNNC1   | TNNC1   | LEVOSIMENDAN                         | potentiator                | TdgClinicalTrial TEND TTD                                                |
| TNNC1   | TNNC1   | BEPRIDIL                             | other/unknown              | TdgClinicalTrial TEND                                                    |
| TNNC1   | TNNC1   | PURPUROGALLIN                        |                            | DTC                                                                      |
| TNNC1   | TNNC1   | PYROGALLOL RED                       |                            | DTC                                                                      |
| TNNC1   | TNNC1   | CHEMBL1601846                        |                            | DTC                                                                      |
| CD70    | CD70    | MDX-1411                             |                            | TdgClinicalTrial TTD                                                     |
| CD70    | CD70    | VORSETUZUMAB MAFODOTIN               |                            | TdgClinicalTrial                                                         |
| GSTM3   | GSTM3   | OLANZAPINE                           |                            | PharmGKB                                                                 |
| F11     | F11     | THROMBIN                             | activator                  | NCI                                                                      |
| F11     | F11     | SULFATED PENTAGALLOYLGLUCOSIDE       |                            | DTC                                                                      |
| SCARB1  | SCARB1  | RIBAVIRIN                            |                            | PharmGKB                                                                 |
| SCARB1  | SCARB1  | ATORVASTATIN                         |                            | PharmGKB                                                                 |
| SCARB1  | SCARB1  | FENOFIBRATE                          |                            | PharmGKB                                                                 |
| SLC16A3 | SLC16A3 | STREPTOZOCIN                         |                            | NCI                                                                      |
| SLC15A2 | SLC15A2 | SORAFENIB                            |                            | PharmGKB                                                                 |
| TYMP    | TYMP    | URIDINE                              |                            | TTD                                                                      |
| TYMP    | TYMP    | FLUOROURACIL                         |                            | NCI PharmGKB                                                             |
| TYMP    | TYMP    | CAPECITABINE                         |                            | PharmGKB                                                                 |
| TYMP    | TYMP    | TIPIRACIL HYDROCHLORIDE              | inhibitor                  | ChemblInteractions                                                       |
| TYMP    | TYMP    | PROGESTERONE                         |                            | NCI                                                                      |
| TYMP    | TYMP    | SULFASALAZINE                        |                            | NCI                                                                      |
| FGF1    | FGF1    | MUPARFOSTAT                          | inhibitor                  | ChemblInteractions                                                       |
| SCNN1A  | SCNN1A  | TRIAMTERENE                          | inhibitor blocker          | TdgClinicalTrial ChemblInteractions TEND PharmGKB                        |
| SCNN1A  | SCNN1A  | AMILORIDE                            | inhibitor blocker          | TdgClinicalTrial TEND PharmGKB                                           |
| SCNN1A  | SCNN1A  | AMILORIDE HYDROCHLORIDE              | blocker                    | ChemblInteractions                                                       |
| SCNN1A  | SCNN1A  | P-1037                               | blocker                    | ChemblInteractions                                                       |
| SDS     | SDS     | DEXAMETHASONE                        |                            | NCI                                                                      |
| COL4A6  | COL4A6  | OCRIPLASMIN                          |                            | ChemblInteractions                                                       |
| COL4A6  | COL4A6  | COLLAGENASE CLOSTRIDIUM HISTOLYTICUM |                            | ChemblInteractions                                                       |
| COL5A3  | COL5A3  | OCRIPLASMIN                          |                            | ChemblInteractions                                                       |
| COL5A3  | COL5A3  | COLLAGENASE CLOSTRIDIUM HISTOLYTICUM |                            | ChemblInteractions                                                       |
| ESRRG   | ESRRG   | DAIDZEIN                             | agonist                    | GuideToPharmacology                                                      |
| ESRRG   | ESRRG   | DIETHYLSTILBESTROL                   | antagonist agonist         | NCI GuideToPharmacology                                                  |

|        |        |                           |            |                                                               |
|--------|--------|---------------------------|------------|---------------------------------------------------------------|
| ESRRG  | ESRRG  | GENISTEIN                 | agonist    | GuideToPharmacology                                           |
| ESRRG  | ESRRG  | AFIMOXIFENE               | antagonist | ChemblInteractions                                            |
| ESRRG  | ESRRG  | AFIMOXIFENE               | agonist    | GuideToPharmacology                                           |
| ESRRG  | ESRRG  | CHEMBL193836              | agonist    | GuideToPharmacology                                           |
| ESRRG  | ESRRG  | CHEMBL201013              | agonist    | GuideToPharmacology                                           |
| PIK3R5 | PIK3R5 | QUERCETIN                 | inhibitor  | MyCancerGenome                                                |
| PIK3R5 | PIK3R5 | BGT-226                   | inhibitor  | ChemblInteractions                                            |
| PIK3R5 | PIK3R5 | WX-037                    | inhibitor  | ChemblInteractions                                            |
| PIK3R5 | PIK3R5 | OMIPALISIB                | inhibitor  | ChemblInteractions MyCancerGenomeClinicalTrial                |
| PIK3R5 | PIK3R5 | VS-5584                   | inhibitor  | ChemblInteractions                                            |
| PIK3R5 | PIK3R5 | PUQUITINIB                | inhibitor  | ChemblInteractions                                            |
| PIK3R5 | PIK3R5 | PILARALISIB               | inhibitor  | MyCancerGenome ChemblInteractions                             |
| PIK3R5 | PIK3R5 | RG-7666                   | inhibitor  | ChemblInteractions                                            |
| PIK3R5 | PIK3R5 | PI-103                    | inhibitor  | MyCancerGenome                                                |
| PIK3R5 | PIK3R5 | GSK-2636771               | inhibitor  | MyCancerGenome                                                |
| PIK3R5 | PIK3R5 | VOXTALISIB                | inhibitor  | MyCancerGenome ChemblInteractions                             |
| PIK3R5 | PIK3R5 | RECILISIB                 | inhibitor  | ChemblInteractions                                            |
| PIK3R5 | PIK3R5 | TASELISIB                 | inhibitor  | ChemblInteractions                                            |
| PIK3R5 | PIK3R5 | AZD-6482                  | inhibitor  | ChemblInteractions                                            |
| PIK3R5 | PIK3R5 | BUPARLISIB                | inhibitor  | MyCancerGenome ChemblInteractions                             |
| PIK3R5 | PIK3R5 | GEDATOLISIB               | inhibitor  | MyCancerGenome ChemblInteractions MyCancerGenomeClinicalTrial |
| PIK3R5 | PIK3R5 | DACTOLISIB                | inhibitor  | MyCancerGenome ChemblInteractions MyCancerGenomeClinicalTrial |
| PIK3R5 | PIK3R5 | INFIGRATINIB              | inhibitor  | MyCancerGenome                                                |
| PIK3R5 | PIK3R5 | PWT-33587                 | inhibitor  | ChemblInteractions                                            |
| PIK3R5 | PIK3R5 | APITOLISIB                | inhibitor  | MyCancerGenome ChemblInteractions                             |
| PIK3R5 | PIK3R5 | SF-1126                   | inhibitor  | ChemblInteractions                                            |
| PIK3R5 | PIK3R5 | SONOLISIB                 | inhibitor  | MyCancerGenome ChemblInteractions MyCancerGenomeClinicalTrial |
| PIK3R5 | PIK3R5 | ALPELISIB                 | inhibitor  | MyCancerGenome MyCancerGenomeClinicalTrial                    |
| PIK3R5 | PIK3R5 | PICTILISIB                | inhibitor  | MyCancerGenome ChemblInteractions                             |
| PIK3R5 | PIK3R5 | SAMOTOLISIB               | inhibitor  | ChemblInteractions                                            |
| PIK3R5 | PIK3R5 | PANULISIB                 | inhibitor  | ChemblInteractions                                            |
| PIK3R5 | PIK3R5 | COPANLISIB                | inhibitor  | MyCancerGenome ChemblInteractions MyCancerGenomeClinicalTrial |
| PIK3R5 | PIK3R5 | ZSTK-474                  | inhibitor  | ChemblInteractions                                            |
| PIK3R5 | PIK3R5 | PF-04691502               | inhibitor  | MyCancerGenome ChemblInteractions                             |
| PIK3R5 | PIK3R5 | GSK-1059615               | inhibitor  | ChemblInteractions                                            |
| PIK3R5 | PIK3R5 | DS-7423                   | inhibitor  | ChemblInteractions                                            |
| PIK3R5 | PIK3R5 | PA-799                    | inhibitor  | ChemblInteractions                                            |
| CEL    | CEL    | GENISTEIN                 |            | NCI                                                           |
| CEL    | CEL    | RESVERATROL               |            | NCI                                                           |
| CEL    | CEL    | SIMVASTATIN               |            | NCI                                                           |
| CEL    | CEL    | GELDANAMYCIN              |            | NCI                                                           |
| EGLN3  | EGLN3  | DAPRODUSTAT               | inhibitor  | ChemblInteractions                                            |
| EGLN3  | EGLN3  | ROXADUSTAT                | inhibitor  | TdgClinicalTrial ChemblInteractions                           |
| NNMT   | NNMT   | NIACIN                    | binder     | TdgClinicalTrial                                              |
| PDE1A  | PDE1A  | CRISABOROLE               | inhibitor  | GuideToPharmacology                                           |
| PDE1A  | PDE1A  | PENTOXIFYLLINE            | inhibitor  | ChemblInteractions                                            |
| PDE1A  | PDE1A  | DIPYRIDAMOLE              | inhibitor  | ChemblInteractions                                            |
| PDE1A  | PDE1A  | VINPOCETINE               | inhibitor  | GuideToPharmacology                                           |
| FCGR3A | FCGR3A | CETUXIMAB                 |            | NCI PharmGKB                                                  |
| FCGR3A | FCGR3A | CYCLOSPORINE              |            | NCI                                                           |
| FCGR3A | FCGR3A | INDOMETHACIN              |            | NCI                                                           |
| FCGR3A | FCGR3A | ETANERCEPT                | ligand     | PharmGKB                                                      |
| FCGR3A | FCGR3A | THALIDOMIDE               |            | NCI                                                           |
| FCGR3A | FCGR3A | TRASTUZUMAB               |            | NCI PharmGKB                                                  |
| FCGR3A | FCGR3A | ALDESLEUKIN               |            | NCI                                                           |
| FCGR3A | FCGR3A | SODIUM CHLORIDE           |            | NCI                                                           |
| FCGR3A | FCGR3A | RITUXIMAB                 |            | PharmGKB                                                      |
| FCGR3A | FCGR3A | EPOETIN ALFA              |            | NCI                                                           |
| FCGR3A | FCGR3A | GELDANAMYCIN              |            | NCI                                                           |
| FCGR3A | FCGR3A | PUROMYCIN                 |            | NCI                                                           |
| FCGR3A | FCGR3A | TESMILIFENE HYDROCHLORIDE |            | NCI                                                           |

|         |         |                        |           |                                                                   |
|---------|---------|------------------------|-----------|-------------------------------------------------------------------|
| FCGR3A  | FCGR3A  | DOXORUBICIN            |           | NCI                                                               |
| FCGR3A  | FCGR3A  | MAFOSFAMIDE            |           | NCI                                                               |
| FCGR3A  | FCGR3A  | TOCILIZUMAB            |           | PharmGKB                                                          |
| FCGR3A  | FCGR3A  | PENICILLIN G POTASSIUM |           | NCI                                                               |
| FCGR3A  | FCGR3A  | INFLIXIMAB             |           | PharmGKB                                                          |
| FCGR3A  | FCGR3A  | CIMETIDINE             |           | NCI                                                               |
| FCGR3A  | FCGR3A  | FENTANYL               |           | NCI                                                               |
| FCGR3A  | FCGR3A  | LACTULOSE              |           | NCI                                                               |
| FCGR3A  | FCGR3A  | ADALIMUMAB             |           | PharmGKB                                                          |
| FCGR3A  | FCGR3A  | PREDNISOLONE           |           | NCI                                                               |
| FCGR3A  | FCGR3A  | HEPARIN                |           | NCI                                                               |
| HLA-B   | HLA-B   | PAZOPANIB              |           | PharmGKB FDA                                                      |
| HLA-B   | HLA-B   | MINOCYCLINE            |           | PharmGKB                                                          |
| HLA-B   | HLA-B   | DAPSONE                |           | PharmGKB                                                          |
| HLA-B   | HLA-B   | BCG VACCINE            |           | NCI                                                               |
| HLA-B   | HLA-B   | TICLOPIDINE            |           | PharmGKB                                                          |
| HLA-B   | HLA-B   | CLOZAPINE              |           | PharmGKB                                                          |
| HLA-B   | HLA-B   | RIBAVIRIN              |           | PharmGKB                                                          |
| HLA-B   | HLA-B   | CARBAMAZEPINE          |           | NCI FDA                                                           |
| HLA-B   | HLA-B   | PHENYTOIN              |           | FDA                                                               |
| HLA-B   | HLA-B   | FOSPHENYTOIN           |           | PharmGKB FDA                                                      |
| HLA-B   | HLA-B   | STAVUDINE              |           | PharmGKB                                                          |
| HLA-B   | HLA-B   | ABACAVIR               |           | FDA                                                               |
| HLA-B   | HLA-B   | METHIMAZOLE            |           | PharmGKB                                                          |
| HLA-B   | HLA-B   | OXCARBAZEPINE          |           | FDA                                                               |
| HLA-B   | HLA-B   | CARBIMAZOLE            |           | PharmGKB                                                          |
| HLA-B   | HLA-B   | CLAVULANIC ACID        |           | PharmGKB                                                          |
| HLA-B   | HLA-B   | ACETAZOLAMIDE          |           | PharmGKB                                                          |
| HLA-B   | HLA-B   | THALIDOMIDE            |           | NCI                                                               |
| HLA-B   | HLA-B   | AMOXICILLIN            |           | PharmGKB                                                          |
| HLA-B   | HLA-B   | FLOXACILLIN            |           | PharmGKB                                                          |
| HLA-B   | HLA-B   | SULFASALAZINE          |           | PharmGKB                                                          |
| HLA-B   | HLA-B   | METHAZOLAMIDE          |           | PharmGKB                                                          |
| HLA-B   | HLA-B   | LAMIVUDINE             |           | PharmGKB                                                          |
| HLA-B   | HLA-B   | CLINDAMYCIN            |           | PharmGKB                                                          |
| HLA-B   | HLA-B   | TRICHLOROETHYLENE      |           | PharmGKB                                                          |
| SCD     | SCD     | ARAMCHOL               |           | TTD                                                               |
| SCD     | SCD     | COLCHICINE             |           | NCI                                                               |
| SCD     | SCD     | CLOFIBRATE             |           | NCI                                                               |
| SCD     | SCD     | ROSIGLITAZONE          |           | NCI                                                               |
| SCD     | SCD     | MK-8245                |           | TTD                                                               |
| NPHS1   | NPHS1   | LOSARTAN               |           | PharmGKB                                                          |
| SLC12A3 | SLC12A3 | HYDROCHLOROTHIAZIDE    | inhibitor | TdgClinicalTrial ChembllInteractions TEND GuideToPharmacology     |
| SLC12A3 | SLC12A3 | CHLOROTHIAZIDE         | inhibitor | TdgClinicalTrial ChembllInteractions TEND GuideToPharmacology     |
| SLC12A3 | SLC12A3 | TRICHLORMETHIAZIDE     | inhibitor | ChembllInteractions                                               |
| SLC12A3 | SLC12A3 | BENZTHIAZIDE           | inhibitor | TdgClinicalTrial ChembllInteractions TEND                         |
| SLC12A3 | SLC12A3 | METOLAZONE             | inhibitor | TdgClinicalTrial ChembllInteractions TEND GuideToPharmacology TTD |
| SLC12A3 | SLC12A3 | QUINETHAZONE           | inhibitor | TdgClinicalTrial ChembllInteractions TEND                         |
| SLC12A3 | SLC12A3 | DIAZOXIDE              |           | TdgClinicalTrial TEND                                             |
| SLC12A3 | SLC12A3 | BUMETANIDE             |           | PharmGKB                                                          |
| SLC12A3 | SLC12A3 | BENDROFLUMETHIAZIDE    | inhibitor | TdgClinicalTrial ChembllInteractions TEND TTD                     |
| SLC12A3 | SLC12A3 | HYDROFLUMETHIAZIDE     | inhibitor | ChembllInteractions                                               |
| SLC12A3 | SLC12A3 | POLYTHIAZIDE           | inhibitor | TdgClinicalTrial ChembllInteractions TEND TTD                     |
| SLC12A3 | SLC12A3 | FUROSEMIDE             |           | PharmGKB                                                          |
| SLC12A3 | SLC12A3 | CYCLOTHIAZIDE          | inhibitor | ChembllInteractions GuideToPharmacology                           |
| SLC12A3 | SLC12A3 | TORSEMIDE              |           | PharmGKB                                                          |
| SLC12A3 | SLC12A3 | CHLOROTHIAZIDE SODIUM  | inhibitor | ChembllInteractions                                               |
| SLC12A3 | SLC12A3 | CHLORTHALIDONE         | inhibitor | ChembllInteractions                                               |
| SLC12A3 | SLC12A3 | METHYCLOTHIAZIDE       | inhibitor | ChembllInteractions                                               |
| SLC12A3 | SLC12A3 | INDAPAMIDE             | inhibitor | ChembllInteractions                                               |
| NPTX2   | NPTX2   | PRM-151                |           | TTD                                                               |

|         |         |                                |                                 |                                                                      |
|---------|---------|--------------------------------|---------------------------------|----------------------------------------------------------------------|
| VIM     | VIM     | PRITUMUMAB                     |                                 | ChEMBLInteractions                                                   |
| VIM     | VIM     | GELDANAMYCIN                   |                                 | NCI                                                                  |
| VIM     | VIM     | ALDESLEUKIN                    |                                 | NCI                                                                  |
| SLC16A5 | SLC16A5 | CISPLATIN                      |                                 | PharmGKB                                                             |
| ADM     | ADM     | CHEMBL35482                    |                                 | NCI                                                                  |
| ADM     | ADM     | CHEMBL472004                   |                                 | DTC                                                                  |
| ADM     | ADM     | INDOMETHACIN                   |                                 | NCI                                                                  |
| ADM     | ADM     | CHEMBL2063510                  |                                 | DTC                                                                  |
| ADM     | ADM     | PAROXETINE                     |                                 | PharmGKB                                                             |
| ADM     | ADM     | INSULIN                        |                                 | NCI                                                                  |
| ADM     | ADM     | ALTEPLASE                      |                                 | NCI                                                                  |
| PSMB8   | PSMB8   | CARFILZOMIB                    | inhibitor                       | DTC MyCancerGenome ChEMBLInteractions                                |
| PSMB8   | PSMB8   | OPROZOMIB                      | inhibitor                       | ChEMBLInteractions                                                   |
| PSMB8   | PSMB8   | BORTEZOMIB                     | inhibitor                       | DTC MyCancerGenome ChEMBLInteractions                                |
| PSMB8   | PSMB8   | KZR-616                        | inhibitor                       | GuideToPharmacology                                                  |
| PSMB8   | PSMB8   | BELACTOSIN A                   |                                 | DTC                                                                  |
| PSMB8   | PSMB8   | MARIZOMIB                      | inhibitor                       | ChEMBLInteractions                                                   |
| PSMB8   | PSMB8   | IXAZOMIB CITRATE               | inhibitor                       | ChEMBLInteractions                                                   |
| PSMB8   | PSMB8   | LACTACYSTIN                    |                                 | DTC                                                                  |
| FOLR3   | FOLR3   | PEMETREXED                     |                                 | PharmGKB                                                             |
| TMSB10  | TMSB10  | MELATONIN                      |                                 | NCI                                                                  |
| P2RX7   | P2RX7   | GSK1482160                     | allosteric modulator antagonist | ChEMBLInteractions GuideToPharmacology TTD                           |
| P2RX7   | P2RX7   | CYCLIC ADENOSINE MONOPHOSPHATE | allosteric modulator            | GuideToPharmacology                                                  |
| P2RX7   | P2RX7   | AZD9056                        | antagonist                      | ChEMBLInteractions TTD                                               |
| P2RX7   | P2RX7   | JNJ-54175446                   |                                 | TTD                                                                  |
| P2RX7   | P2RX7   | CHELERYTHRINE                  | allosteric modulator            | GuideToPharmacology                                                  |
| P2RX7   | P2RX7   | FENTANYL                       |                                 | PharmGKB                                                             |
| P2RX7   | P2RX7   | ADENOSINE TRIPHOSPHATE         | agonist                         | GuideToPharmacology                                                  |
| P2RX7   | P2RX7   | EVT401                         | antagonist                      | TdgClinicalTrial ChEMBLInteractions                                  |
| P2RX7   | P2RX7   | IVERMECTIN                     | allosteric modulator            | GuideToPharmacology                                                  |
| P2RX7   | P2RX7   | CE-224535                      | antagonist                      | ChEMBLInteractions TTD                                               |
| P2RX7   | P2RX7   | CLEMASTINE                     | allosteric modulator            | GuideToPharmacology                                                  |
| KLK7    | KLK7    | CASTANIN                       |                                 | DTC                                                                  |
| SLC6A3  | SLC6A3  | MODAFINIL                      | inhibitor                       | TdgClinicalTrial ChEMBLInteractions TTD                              |
| SLC6A3  | SLC6A3  | ACETYLCYSTEINE                 |                                 | NCI                                                                  |
| SLC6A3  | SLC6A3  | ALTROPANE                      |                                 | TdgClinicalTrial TTD                                                 |
| SLC6A3  | SLC6A3  | BENZTROPINE                    |                                 | TdgClinicalTrial TEND                                                |
| SLC6A3  | SLC6A3  | FENCAMFAMIN                    | inhibitor                       | TdgClinicalTrial TEND                                                |
| SLC6A3  | SLC6A3  | AMPHETAMINE                    | negative modulator              | TdgClinicalTrial ChEMBLInteractions NCI TEND                         |
| SLC6A3  | SLC6A3  | DEXMETHYLPHENIDATE             | inhibitor                       | TdgClinicalTrial GuideToPharmacology                                 |
| SLC6A3  | SLC6A3  | PHENDIMETRAZINE TARTRATE       | inhibitor                       | ChEMBLInteractions                                                   |
| SLC6A3  | SLC6A3  | SIBUTRAMINE HYDROCHLORIDE      | inhibitor                       | ChEMBLInteractions                                                   |
| SLC6A3  | SLC6A3  | VANOXERINE                     | inhibitor                       | GuideToPharmacology                                                  |
| SLC6A3  | SLC6A3  | LISDEXAMFETAMINE               | inhibitor                       | TdgClinicalTrial TEND                                                |
| SLC6A3  | SLC6A3  | DIETHYLPROPION HYDROCHLORIDE   | inhibitor                       | ChEMBLInteractions                                                   |
| SLC6A3  | SLC6A3  | LEVOMILNACIPRAN                | inhibitor                       | GuideToPharmacology                                                  |
| SLC6A3  | SLC6A3  | METHYLPHENIDATE                | inhibitor                       | TdgClinicalTrial ChEMBLInteractions NCI TEND GuideToPharmacology TTD |
| SLC6A3  | SLC6A3  | AMPHETAMINE ADIPATE            |                                 | ChEMBLInteractions                                                   |
| SLC6A3  | SLC6A3  | ATOMOXETINE                    | binder inhibitor                | GuideToPharmacology                                                  |
| SLC6A3  | SLC6A3  | PSEUDOEPHEDRINE                | inhibitor                       | TdgClinicalTrial                                                     |
| SLC6A3  | SLC6A3  | AMITIFADINE                    |                                 | TTD                                                                  |
| SLC6A3  | SLC6A3  | DEXTROAMPHETAMINE SULFATE      |                                 | ChEMBLInteractions                                                   |
| SLC6A3  | SLC6A3  | DEXTROAMPHETAMINE              | negative modulator inhibitor    | TdgClinicalTrial ChEMBLInteractions TEND GuideToPharmacology         |
| SLC6A3  | SLC6A3  | SIBUTRAMINE                    | inhibitor                       | TdgClinicalTrial GuideToPharmacology                                 |
| SLC6A3  | SLC6A3  | METHAMPHETAMINE                | negative modulator              | TdgClinicalTrial                                                     |
| SLC6A3  | SLC6A3  | DASOTRALINE                    | inhibitor                       | ChEMBLInteractions TTD                                               |
| SLC6A3  | SLC6A3  | BUPROPION                      | inhibitor                       | TdgClinicalTrial TEND GuideToPharmacology                            |
| SLC6A3  | SLC6A3  | DISULFIRAM                     |                                 | PharmGKB                                                             |
| SLC6A3  | SLC6A3  | PHENMETRAZINE                  | inhibitor                       | TdgClinicalTrial TEND TTD                                            |
| SLC6A3  | SLC6A3  | TRIMIPRAMINE                   | inhibitor                       | GuideToPharmacology                                                  |
| SLC6A3  | SLC6A3  | ALTROPANE I-123                |                                 | TTD                                                                  |



|         |         |                                  |                      |                                                                                                         |
|---------|---------|----------------------------------|----------------------|---------------------------------------------------------------------------------------------------------|
| SLC6A3  | SLC6A3  | DIETHYLPROPION                   | inhibitor            | TdgClinicalTrial TEND                                                                                   |
| SLC6A3  | SLC6A3  | HALOPERIDOL                      |                      | PharmGKB                                                                                                |
| SLC6A3  | SLC6A3  | NICOTINE                         |                      | NCI                                                                                                     |
| SLC6A3  | SLC6A3  | SERTRALINE                       | binder inhibitor     | TdgClinicalTrial                                                                                        |
| SLC6A3  | SLC6A3  | COCAINE                          | inhibitor            | TdgClinicalTrial TEND PharmGKB TTD                                                                      |
| SLC6A3  | SLC6A3  | AMPHETAMINE SULFATE              |                      | ChemblInteractions                                                                                      |
| SLC6A3  | SLC6A3  | PHENTERMINE                      | inhibitor            | TdgClinicalTrial TEND                                                                                   |
| SLC6A3  | SLC6A3  | CLOZAPINE                        |                      | PharmGKB                                                                                                |
| SLC6A3  | SLC6A3  | MAZINDOL                         | inhibitor            | ChemblInteractions GuideToPharmacology                                                                  |
| SLC6A3  | SLC6A3  | PHENELZINE                       | inhibitor            | GuideToPharmacology                                                                                     |
| SLC6A3  | SLC6A3  | PHENMETRAZINE HYDROCHLORIDE      | inhibitor            | ChemblInteractions                                                                                      |
| SLC6A3  | SLC6A3  | TEDATIOXETINE                    | inhibitor            | TdgClinicalTrial ChemblInteractions                                                                     |
| SLC6A3  | SLC6A3  | METHAMPHETAMINE HYDROCHLORIDE    | inhibitor            | ChemblInteractions                                                                                      |
| SLC6A3  | SLC6A3  | NOMIFENSINE                      | inhibitor            | GuideToPharmacology                                                                                     |
| SLC6A3  | SLC6A3  | DEXMETHYLPHENIDATE HYDROCHLORIDE | inhibitor            | ChemblInteractions                                                                                      |
| SLC6A3  | SLC6A3  | DEXTROAMPHETAMINE ADIPATE        |                      | ChemblInteractions                                                                                      |
| SLC6A3  | SLC6A3  | SPIROGLUMIDE                     |                      | TTD                                                                                                     |
| SLC6A3  | SLC6A3  | CLOMIPRAMINE                     | inhibitor            | GuideToPharmacology                                                                                     |
| SLC6A3  | SLC6A3  | RTI-336                          |                      | TTD                                                                                                     |
| SLC6A3  | SLC6A3  | ARMODAFINIL                      | antagonist inhibitor | TdgClinicalTrial ChemblInteractions                                                                     |
| SLC6A3  | SLC6A3  | BUPROPION HYDROCHLORIDE          | inhibitor            | ChemblInteractions                                                                                      |
| SLC6A3  | SLC6A3  | AMPHETAMINE ASPARTATE            |                      | ChemblInteractions                                                                                      |
| SLC6A3  | SLC6A3  | BUPROPION HYDROBROMIDE           | inhibitor            | ChemblInteractions                                                                                      |
| SLC6A3  | SLC6A3  | METHYLPHENIDATE HYDROCHLORIDE    | inhibitor            | ChemblInteractions                                                                                      |
| SLC6A3  | SLC6A3  | METYROSINE                       |                      | NCI                                                                                                     |
| SLC6A3  | SLC6A3  | HINOKININ                        |                      | DTC                                                                                                     |
| SLC6A3  | SLC6A3  | SOLRIAMFETOL                     | inhibitor            | GuideToPharmacology                                                                                     |
| SLC6A3  | SLC6A3  | LISDEXAMFETAMINE DIMESYLATE      |                      | TdgClinicalTrial ChemblInteractions                                                                     |
| SLC6A3  | SLC6A3  | LIAFENSINE                       | inhibitor            | ChemblInteractions                                                                                      |
| SLC6A3  | SLC6A3  | MIDOMAFETAMINE                   | negative modulator   | TTD                                                                                                     |
| SLC6A3  | SLC6A3  | LEVODOPA                         |                      | PharmGKB                                                                                                |
| SLC6A3  | SLC6A3  | DESVENLAFAXINE                   | inhibitor            | GuideToPharmacology                                                                                     |
| HSD11B2 | HSD11B2 | HYDROCORTISONE                   |                      | NCI                                                                                                     |
| ERBB4   | ERBB4   | PALIPERIDONE                     |                      | PharmGKB                                                                                                |
| ERBB4   | ERBB4   | PELITINIB                        | inhibitor            | TALC MyCancerGenome                                                                                     |
| ERBB4   | ERBB4   | ERLOTINIB                        |                      | DTC JAX-CKB PharmGKB                                                                                    |
| ERBB4   | ERBB4   | AC-480                           | inhibitor            | TALC MyCancerGenome TdgClinicalTrial ChemblInteractions GuideToPharmacology                             |
| ERBB4   | ERBB4   | AFATINIB                         | inhibitor            | JAX-CKB CGI                                                                                             |
| ERBB4   | ERBB4   | LAPATINIB                        |                      | DTC JAX-CKB CGI DoCM CIViC PharmGKB                                                                     |
| ERBB4   | ERBB4   | ILORASERTIB                      |                      | DTC                                                                                                     |
| ERBB4   | ERBB4   | CETUXIMAB                        |                      | JAX-CKB                                                                                                 |
| ERBB4   | ERBB4   | JNJ-26483327                     | inhibitor            | ChemblInteractions                                                                                      |
| ERBB4   | ERBB4   | AZD-1152-HQPA                    |                      | DTC                                                                                                     |
| ERBB4   | ERBB4   | IBRUTINIB                        | inhibitor            | GuideToPharmacology                                                                                     |
| ERBB4   | ERBB4   | DACOMITINIB                      | inhibitor            | TALC MyCancerGenome TdgClinicalTrial ChemblInteractions GuideToPharmacology MyCancerGenomeClinicalTrial |
| ERBB4   | ERBB4   | CURCUMIN                         |                      | DTC                                                                                                     |
| ERBB4   | ERBB4   | LAUROGUADINE                     |                      | DTC                                                                                                     |
| ERBB4   | ERBB4   | SP-600125                        |                      | DTC                                                                                                     |
| ERBB4   | ERBB4   | TUCATINIB                        | inhibitor            | GuideToPharmacology                                                                                     |
| ERBB4   | ERBB4   | ALLITINIB                        | inhibitor            | GuideToPharmacology                                                                                     |
| ERBB4   | ERBB4   | GEFITINIB                        | inhibitor            | DTC MyCancerGenomeClinicalTrial PharmGKB                                                                |
| ERBB4   | ERBB4   | METHYLCURCUMIN                   |                      | DTC                                                                                                     |
| ERBB4   | ERBB4   | R-406                            |                      | DTC                                                                                                     |
| ERBB4   | ERBB4   | DIMETHYLCURCUMIN                 |                      | DTC                                                                                                     |
| ERBB4   | ERBB4   | AEE-788                          | inhibitor            | GuideToPharmacology                                                                                     |
| ERBB4   | ERBB4   | POZIOTINIB                       | inhibitor            | ChemblInteractions GuideToPharmacology MyCancerGenomeClinicalTrial                                      |
| ERBB4   | ERBB4   | SB-220025                        |                      | DTC                                                                                                     |
| ERBB4   | ERBB4   | BMS-690514                       | inhibitor            | TALC MyCancerGenome ChemblInteractions                                                                  |
| ERBB4   | ERBB4   | TAK-715                          |                      | DTC                                                                                                     |
| ERBB4   | ERBB4   | OSIMERTINIB MESYLATE             | inhibitor            | ChemblInteractions                                                                                      |
| ERBB4   | ERBB4   | AFATINIB DIMALEATE               | inhibitor            | ChemblInteractions                                                                                      |

|         |         |                            |                           |                                                                                                                |
|---------|---------|----------------------------|---------------------------|----------------------------------------------------------------------------------------------------------------|
| ERBB4   | ERBB4   | TAE-684                    |                           | DTC                                                                                                            |
| ERBB4   | ERBB4   | CENISERTIB                 |                           | DTC                                                                                                            |
| ERBB4   | ERBB4   | VANDETANIB                 | inhibitor                 | ChemblInteractions                                                                                             |
| ERBB4   | ERBB4   | DASATINIB                  |                           | DTC                                                                                                            |
| ERBB4   | ERBB4   | CHEMBL578061               |                           | DTC                                                                                                            |
| ERBB4   | ERBB4   | CANERTINIB DIHYDROCHLORIDE | inhibitor                 | ChemblInteractions                                                                                             |
| ERBB4   | ERBB4   | RG-1530                    |                           | DTC                                                                                                            |
| ERBB4   | ERBB4   | ACALABRUTINIB              | inhibitor                 | GuideToPharmacology                                                                                            |
| ERBB4   | ERBB4   | ALISERTIB                  |                           | DTC                                                                                                            |
| ERBB4   | ERBB4   | CEDIRANIB                  |                           | DTC                                                                                                            |
| KCNK13  | KCNK13  | HALOTHANE                  | inhibitor                 | GuideToPharmacology                                                                                            |
| TRPM2   | TRPM2   | ECONAZOLE                  | blocker                   | GuideToPharmacology                                                                                            |
| TRPM2   | TRPM2   | CLOTRIMAZOLE               | blocker                   | GuideToPharmacology                                                                                            |
| TRPM2   | TRPM2   | NADIDE                     | activator                 | GuideToPharmacology                                                                                            |
| TRPM2   | TRPM2   | MICONAZOLE                 | blocker                   | GuideToPharmacology                                                                                            |
| IL2RB   | IL2RB   | BASILIXIMAB                | inhibitor antibody        | ChemblInteractions                                                                                             |
| IL2RB   | IL2RB   | ALDESLEUKIN                | agonist                   | TdgClinicalTrial                                                                                               |
| IL2RB   | IL2RB   | DENILEUKIN DIFTITOX        | agonist                   | ChemblInteractions                                                                                             |
| IL2RB   | IL2RB   | ALDESLEUKIN                | modulator agonist         | TdgClinicalTrial ChemblInteractions TEND                                                                       |
| IL2RB   | IL2RB   | DACLIZUMAB                 | inhibitor antibody        | ChemblInteractions                                                                                             |
| IL2RB   | IL2RB   | BEMPEGALDESLEUKIN          | agonist                   | GuideToPharmacology                                                                                            |
| TNFRSF4 | TNFRSF4 | TAVOLIMAB                  |                           | TTD                                                                                                            |
| TNFRSF4 | TNFRSF4 | VONLEROLIZUMAB             | antibody                  | GuideToPharmacology                                                                                            |
| TNFRSF4 | TNFRSF4 | IVUXOLIMAB                 |                           | TTD                                                                                                            |
| COL26A1 | COL26A1 | ASPIRIN                    |                           | PharmGKB                                                                                                       |
| COL26A1 | COL26A1 | CITALOPRAM                 |                           | PharmGKB                                                                                                       |
| FCER1G  | FCER1G  | ASPIRIN                    |                           | PharmGKB                                                                                                       |
| ENO2    | ENO2    | INDOMETHACIN               |                           | NCI                                                                                                            |
| ENO2    | ENO2    | STREPTOZOCIN               |                           | NCI                                                                                                            |
| ENO2    | ENO2    | INSULIN                    |                           | NCI                                                                                                            |
| ENO2    | ENO2    | FLOXURIDINE                |                           | NCI                                                                                                            |
| ENO2    | ENO2    | GABAPENTIN                 |                           | NCI                                                                                                            |
| ENO2    | ENO2    | FENRETINIDE                |                           | NCI                                                                                                            |
| ENO2    | ENO2    | LIOTHYRONINE SODIUM        |                           | NCI                                                                                                            |
| ENO2    | ENO2    | PROPOFOL                   |                           | NCI                                                                                                            |
| PROX1   | PROX1   | ATENOLOL                   |                           | PharmGKB                                                                                                       |
| GRIK3   | GRIK3   | TEZAMPANEL                 | antagonist                | TdgClinicalTrial ChemblInteractions                                                                            |
| GRIK3   | GRIK3   | SELURAMPANEL               | antagonist                | ChemblInteractions                                                                                             |
| GRIK3   | GRIK3   | TOPIRAMATE                 | antagonist                | ChemblInteractions                                                                                             |
| GRIK3   | GRIK3   | DYSIHERBAINE               | agonist                   | GuideToPharmacology                                                                                            |
| VEGFA   | VEGFA   | SQUALAMINE                 |                           | TTD                                                                                                            |
| VEGFA   | VEGFA   | FENOFIBRATE                |                           | NCI                                                                                                            |
| VEGFA   | VEGFA   | AFLIBERCEPT                | antibody binder inhibitor | MyCancerGenome TdgClinicalTrial ChemblInteractions PharmGKB TTD                                                |
| VEGFA   | VEGFA   | BEVACIZUMAB                | inhibitor antibody        | TALC MyCancerGenome TdgClinicalTrial ClarityFoundationClinicalTrial ChemblInteractions TEND CIViC PharmGKB TTD |
| VEGFA   | VEGFA   | ZALTRAP                    | antibody                  | TALC                                                                                                           |
| VEGFA   | VEGFA   | SORAFENIB                  |                           | CGI PharmGKB                                                                                                   |
| VEGFA   | VEGFA   | CARBOPLATIN                |                           | PharmGKB                                                                                                       |
| VEGFA   | VEGFA   | ELMIRON                    |                           | NCI                                                                                                            |
| VEGFA   | VEGFA   | SUNITINIB                  |                           | PharmGKB                                                                                                       |
| VEGFA   | VEGFA   | MUPARFOSTAT                | inhibitor                 | ChemblInteractions                                                                                             |
| VEGFA   | VEGFA   | OSI-632                    |                           | TTD                                                                                                            |
| VEGFA   | VEGFA   | RANIBIZUMAB                | inhibitor                 | TdgClinicalTrial ChemblInteractions TEND PharmGKB TTD                                                          |
| VEGFA   | VEGFA   | BEVACIZUMAB 111IN          |                           | ChemblInteractions                                                                                             |
| VEGFA   | VEGFA   | IRINOTECAN                 |                           | PharmGKB                                                                                                       |
| VEGFA   | VEGFA   | REGORAFENIB                |                           | PharmGKB                                                                                                       |
| VEGFA   | VEGFA   | ABICIPAR PEGOL             |                           | TTD                                                                                                            |
| VEGFA   | VEGFA   | OXALIPLATIN                |                           | PharmGKB                                                                                                       |
| VEGFA   | VEGFA   | CONBERCEPT                 | inhibitor                 | ChemblInteractions                                                                                             |
| VEGFA   | VEGFA   | BROLUCIZUMAB               | inhibitor                 | ChemblInteractions                                                                                             |
| VEGFA   | VEGFA   | LENALIDOMIDE               |                           | ClarityFoundationClinicalTrial                                                                                 |
| VEGFA   | VEGFA   | NAVICIXIZUMAB              |                           | TTD                                                                                                            |

|        |        |                         |                                  |                                                                  |
|--------|--------|-------------------------|----------------------------------|------------------------------------------------------------------|
| VEGFA  | VEGFA  | LEUCOVORIN              |                                  | PharmGKB                                                         |
| VEGFA  | VEGFA  | DOMATINOSTAT            |                                  | TdgClinicalTrial                                                 |
| VEGFA  | VEGFA  | PEGAPTANIB SODIUM       | antagonist                       | TdgClinicalTrial ChemblInteractions PharmGKB                     |
| VEGFA  | VEGFA  | DOCETAXEL               |                                  | PharmGKB                                                         |
| VEGFA  | VEGFA  | CAPECITABINE            |                                  | PharmGKB                                                         |
| VEGFA  | VEGFA  | PHENYTOIN               |                                  | NCI                                                              |
| VEGFA  | VEGFA  | SILDENAFIL              |                                  | PharmGKB                                                         |
| VEGFA  | VEGFA  | GENTAMICIN              |                                  | NCI                                                              |
| VEGFA  | VEGFA  | BEVASIRANIB             |                                  | TdgClinicalTrial                                                 |
| VEGFA  | VEGFA  | CDC-801                 |                                  | NCI                                                              |
| VEGFA  | VEGFA  | CILOSTAZOL              |                                  | NCI                                                              |
| VEGFA  | VEGFA  | FLUOROURACIL            |                                  | PharmGKB                                                         |
| VEGFA  | VEGFA  | CELECOXIB               |                                  | PharmGKB                                                         |
| VEGFA  | VEGFA  | CISPLATIN               |                                  | PharmGKB                                                         |
| VEGFA  | VEGFA  | MP-0250                 |                                  | TTD                                                              |
| VEGFA  | VEGFA  | RISUTEGANIB             |                                  | TTD                                                              |
| VEGFA  | VEGFA  | ENALAPRIL               |                                  | PharmGKB                                                         |
| GABRA2 | GABRA2 | HALAZEPAM               | positive modulator potentiator   | TdgClinicalTrial ChemblInteractions TEND                         |
| GABRA2 | GABRA2 | CLONAZEPAM              | allosteric modulator positive mo | TdgClinicalTrial ChemblInteractions TEND GuideToPharmacology     |
| GABRA2 | GABRA2 | FLUMAZENIL              | allosteric modulator             | TdgClinicalTrial ChemblInteractions TEND GuideToPharmacology TTD |
| GABRA2 | GABRA2 | BROMAZEPAM              | potentiator                      | TdgClinicalTrial TEND                                            |
| GABRA2 | GABRA2 | CINOLAZEPAM             | potentiator                      | TdgClinicalTrial TEND                                            |
| GABRA2 | GABRA2 | BUTETHAL                | potentiator                      | TdgClinicalTrial TEND                                            |
| GABRA2 | GABRA2 | PHENOBARBITAL           |                                  | TdgClinicalTrial TEND                                            |
| GABRA2 | GABRA2 | ISOGUVACINE             | agonist                          | GuideToPharmacology                                              |
| GABRA2 | GABRA2 | FLUNITRAZEPAM           | allosteric modulator potentiator | TdgClinicalTrial TEND GuideToPharmacology                        |
| GABRA2 | GABRA2 | GANAXOLONE              |                                  | TdgClinicalTrial                                                 |
| GABRA2 | GABRA2 | PAGOCLONE               |                                  | TdgClinicalTrial                                                 |
| GABRA2 | GABRA2 | TALBUTAL                | potentiator positive modulator   | TdgClinicalTrial ChemblInteractions TEND                         |
| GABRA2 | GABRA2 | PRIMIDONE               | positive modulator potentiator   | TdgClinicalTrial ChemblInteractions TEND                         |
| GABRA2 | GABRA2 | DIAZEPAM                | allosteric modulator positive mo | TdgClinicalTrial ChemblInteractions TEND GuideToPharmacology     |
| GABRA2 | GABRA2 | ENFLURANE               |                                  | ChemblInteractions                                               |
| GABRA2 | GABRA2 | ADIPIPLON               | partial agonist                  | TdgClinicalTrial ChemblInteractions                              |
| GABRA2 | GABRA2 | MEPHOBARBITAL           | potentiator                      | TdgClinicalTrial TEND                                            |
| GABRA2 | GABRA2 | PICROTOXIN              | blocker                          | GuideToPharmacology                                              |
| GABRA2 | GABRA2 | AZD7325                 | positive modulator allosteric mo | ChemblInteractions GuideToPharmacology                           |
| GABRA2 | GABRA2 | ADINAZOLAM              | potentiator                      | TdgClinicalTrial TEND                                            |
| GABRA2 | GABRA2 | HEXOBARBITAL            | potentiator                      | TdgClinicalTrial TEND                                            |
| GABRA2 | GABRA2 | TEMAZEPAM               | positive modulator potentiator   | TdgClinicalTrial ChemblInteractions TEND                         |
| GABRA2 | GABRA2 | TRIAZOLAM               | allosteric modulator potentiator | TdgClinicalTrial ChemblInteractions TEND GuideToPharmacology     |
| GABRA2 | GABRA2 | ALPRAZOLAM              | allosteric modulator positive mo | TdgClinicalTrial ChemblInteractions TEND GuideToPharmacology     |
| GABRA2 | GABRA2 | QUAZEPAM                | potentiator positive modulator   | TdgClinicalTrial ChemblInteractions TEND                         |
| GABRA2 | GABRA2 | THIOPENTAL SODIUM       | positive modulator               | ChemblInteractions                                               |
| GABRA2 | GABRA2 | MIDAZOLAM               | potentiator                      | TdgClinicalTrial TEND                                            |
| GABRA2 | GABRA2 | TRICLOFOS SODIUM        |                                  | ChemblInteractions                                               |
| GABRA2 | GABRA2 | NITRAZEPAM              | potentiator                      | TdgClinicalTrial TEND                                            |
| GABRA2 | GABRA2 | DESFLURANE              | positive modulator               | ChemblInteractions                                               |
| GABRA2 | GABRA2 | MEPROBAMATE             | agonist                          | TdgClinicalTrial ChemblInteractions TEND                         |
| GABRA2 | GABRA2 | PRAZEPAM                | potentiator positive modulator   | TdgClinicalTrial ChemblInteractions TEND                         |
| GABRA2 | GABRA2 | CHLORDIAZEPOXIDE        | positive modulator               | TdgClinicalTrial ChemblInteractions TEND                         |
| GABRA2 | GABRA2 | CLOBAZAM                | positive modulator               | TdgClinicalTrial ChemblInteractions TEND                         |
| GABRA2 | GABRA2 | OXAZEPAM                | positive modulator potentiator   | TdgClinicalTrial ChemblInteractions TEND                         |
| GABRA2 | GABRA2 | PROPOFOL                | positive modulator               | ChemblInteractions                                               |
| GABRA2 | GABRA2 | ETOMIDATE               |                                  | DTC ChemblInteractions                                           |
| GABRA2 | GABRA2 | MUSCIMOL                | agonist                          | GuideToPharmacology                                              |
| GABRA2 | GABRA2 | PF-06372865             | allosteric modulator agonist     | ChemblInteractions GuideToPharmacology                           |
| GABRA2 | GABRA2 | MIDAZOLAM HYDROCHLORIDE | positive modulator               | ChemblInteractions                                               |
| GABRA2 | GABRA2 | BUTALBITAL              | positive modulator potentiator   | TdgClinicalTrial ChemblInteractions TEND                         |
| GABRA2 | GABRA2 | ESTAZOLAM               | potentiator positive modulator   | TdgClinicalTrial ChemblInteractions TEND                         |
| GABRA2 | GABRA2 | TOPIRAMATE              |                                  | ChemblInteractions                                               |
| GABRA2 | GABRA2 | METHARBITAL             | potentiator positive modulator   | TdgClinicalTrial ChemblInteractions TEND                         |

|        |        |                                |                                |                                                                  |
|--------|--------|--------------------------------|--------------------------------|------------------------------------------------------------------|
| GABRA2 | GABRA2 | PENTOBARBITAL SODIUM           | positive modulator             | ChemblInteractions                                               |
| GABRA2 | GABRA2 | ZOPICLONE                      | potentiator                    | TdgClinicalTrial TEND                                            |
| GABRA2 | GABRA2 | FLUDIAZEPAM                    | potentiator                    | TdgClinicalTrial TEND                                            |
| GABRA2 | GABRA2 | ZOLPIDEM                       | agonist allosteric modulator   | TdgClinicalTrial TEND GuideToPharmacology                        |
| GABRA2 | GABRA2 | GABOXADOL                      | agonist                        | TdgClinicalTrial ChemblInteractions GuideToPharmacology          |
| GABRA2 | GABRA2 | METHYPRYLON                    | positive modulator             | ChemblInteractions                                               |
| GABRA2 | GABRA2 | COCAINE                        |                                | PharmGKB                                                         |
| GABRA2 | GABRA2 | CLORAZEPIC ACID                |                                | TdgClinicalTrial TEND                                            |
| GABRA2 | GABRA2 | METHOHEXITAL SODIUM            | positive modulator             | ChemblInteractions                                               |
| GABRA2 | GABRA2 | RESEQUINIL                     | inverse agonist                | ChemblInteractions                                               |
| GABRA2 | GABRA2 | OCINAPLON                      | allosteric modulator           | TdgClinicalTrial GuideToPharmacology                             |
| GABRA2 | GABRA2 | ISOFLURANE                     | positive modulator             | ChemblInteractions                                               |
| GABRA2 | GABRA2 | LORAZEPAM                      | positive modulator             | TdgClinicalTrial ChemblInteractions TEND                         |
| GABRA2 | GABRA2 | AZD6280                        | positive modulator             | ChemblInteractions                                               |
| GABRA2 | GABRA2 | METHOXYFLURANE                 |                                | ChemblInteractions                                               |
| GABRA2 | GABRA2 | SECOBARBITAL                   | potentiator                    | TdgClinicalTrial TEND                                            |
| GABRA2 | GABRA2 | GLUTETHIMIDE                   |                                | ChemblInteractions                                               |
| GABRA2 | GABRA2 | CLOTIAZEPAM                    | potentiator                    | TdgClinicalTrial TEND                                            |
| GABRA2 | GABRA2 | THIOPENTAL                     | potentiator                    | TdgClinicalTrial TEND                                            |
| GABRA2 | GABRA2 | BUTABARBITAL                   |                                | TdgClinicalTrial TEND                                            |
| GABRA2 | GABRA2 | GABAZINE                       | antagonist                     | GuideToPharmacology                                              |
| GABRA2 | GABRA2 | FLURAZEPAM                     | potentiator                    | TdgClinicalTrial TEND                                            |
| GABRA2 | GABRA2 | ETAZOLATE                      |                                | TdgClinicalTrial                                                 |
| GABRA2 | GABRA2 | ESZOPICLONE                    | positive modulator agonist     | TdgClinicalTrial ChemblInteractions                              |
| GABRA2 | GABRA2 | THIAMYLAL SODIUM               | positive modulator             | ChemblInteractions                                               |
| GABRA2 | GABRA2 | BRETAZENIL                     | allosteric modulator           | GuideToPharmacology                                              |
| GABRA2 | GABRA2 | SECOBARBITAL SODIUM            | positive modulator             | ChemblInteractions                                               |
| GABRA2 | GABRA2 | BUTABARBITAL SODIUM            | positive modulator             | ChemblInteractions                                               |
| GABRA2 | GABRA2 | PENTOBARBITAL                  | potentiator positive modulator | TdgClinicalTrial ChemblInteractions TEND                         |
| GABRA2 | GABRA2 | AZIETOMIDATE                   |                                | DTC                                                              |
| GABRA2 | GABRA2 | ETHCHLORVYNOL                  |                                | ChemblInteractions                                               |
| GABRA2 | GABRA2 | SEVOFLURANE                    | positive modulator             | ChemblInteractions                                               |
| GABRA2 | GABRA2 | CHLORDIAZEPOXIDE HYDROCHLORIDE | positive modulator             | ChemblInteractions                                               |
| GABRA2 | GABRA2 | BICUCULLINE                    | antagonist                     | GuideToPharmacology                                              |
| GABRA2 | GABRA2 | MK-0777                        | allosteric modulator           | GuideToPharmacology                                              |
| GABRA2 | GABRA2 | REMIMAZOLAM                    |                                | TdgClinicalTrial                                                 |
| GABRA2 | GABRA2 | HALOTHANE                      | positive modulator             | ChemblInteractions                                               |
| GABRA2 | GABRA2 | ACAMPROSATE CALCIUM            |                                | ChemblInteractions                                               |
| GABRA2 | GABRA2 | LOREDIPLON                     | positive modulator             | ChemblInteractions                                               |
| GABRA2 | GABRA2 | CLORAZEPATE DIPOTASSIUM        | positive modulator             | ChemblInteractions                                               |
| AVPR2  | AVPR2  | TOLVAPTAN                      | antagonist                     | TdgClinicalTrial ChemblInteractions TEND GuideToPharmacology TTD |
| AVPR2  | AVPR2  | DESMOPRESSIN                   | agonist                        | TdgClinicalTrial GuideToPharmacology TTD                         |
| AVPR2  | AVPR2  | VASOPRESSIN                    | agonist                        | TdgClinicalTrial ChemblInteractions TEND GuideToPharmacology TTD |
| AVPR2  | AVPR2  | VASOPRESSIN TANNATE            | agonist                        | ChemblInteractions                                               |
| AVPR2  | AVPR2  | LIXIVAPTAN                     | antagonist                     | TdgClinicalTrial ChemblInteractions GuideToPharmacology TTD      |
| AVPR2  | AVPR2  | CONIVAPTAN HYDROCHLORIDE       | antagonist                     | ChemblInteractions                                               |
| AVPR2  | AVPR2  | TERLIPRESSIN                   | agonist                        | TdgClinicalTrial TEND                                            |
| AVPR2  | AVPR2  | MOZAVAPTAN                     | antagonist                     | GuideToPharmacology TTD                                          |
| AVPR2  | AVPR2  | FEDOVAPAGON                    |                                | TTD                                                              |
| AVPR2  | AVPR2  | CONIVAPTAN                     | antagonist                     | TdgClinicalTrial TEND GuideToPharmacology TTD                    |
| AVPR2  | AVPR2  | OXYTOCIN                       | agonist                        | GuideToPharmacology TTD                                          |
| AVPR2  | AVPR2  | SATAVAPTAN                     | antagonist                     | ChemblInteractions GuideToPharmacology TTD                       |
| AVPR2  | AVPR2  | CHEMBL296908                   | antagonist                     | GuideToPharmacology                                              |
| AVPR2  | AVPR2  | CHEMBL435323                   | agonist                        | GuideToPharmacology                                              |
| AVPR2  | AVPR2  | LYPRESSIN                      | agonist                        | ChemblInteractions                                               |
| AVPR2  | AVPR2  | RELCOVAPTAN                    | antagonist                     | GuideToPharmacology                                              |
| AVPR2  | AVPR2  | QUERCETIN                      |                                | DTC                                                              |
| AVPR2  | AVPR2  | ITRACONAZOLE                   |                                | DTC                                                              |
| AVPR2  | AVPR2  | CLOTRIMAZOLE                   |                                | DTC                                                              |
| AVPR2  | AVPR2  | DESMOPRESSIN ACETATE           | agonist                        | ChemblInteractions                                               |
| AVPR2  | AVPR2  | RO-5028442                     | antagonist                     | GuideToPharmacology                                              |

|         |         |                                    |                                 |                                            |
|---------|---------|------------------------------------|---------------------------------|--------------------------------------------|
| AVPR2   | AVPR2   | NELIVAPTAN                         | antagonist                      | GuideToPharmacology                        |
| AVPR2   | AVPR2   | TETRA-IODOPHENOLPHTHALEIN          |                                 | DTC                                        |
| AVPR2   | AVPR2   | BALOVAPTAN                         | antagonist                      | GuideToPharmacology                        |
| AVPR2   | AVPR2   | ATOSIBAN                           | antagonist                      | GuideToPharmacology TTD                    |
| CD247   | CD247   | MUROMONAB-CD3                      |                                 | TdgClinicalTrial                           |
| CD247   | CD247   | AZACITIDINE                        |                                 | NCI                                        |
| CD247   | CD247   | BLINATUMOMAB                       |                                 | TdgClinicalTrial                           |
| CRHBP   | CRHBP   | ALCOHOL                            |                                 | PharmGKB                                   |
| C3      | C3      | COMPSTATIN                         |                                 | DTC                                        |
| C3      | C3      | PEGCETACOPLAN                      |                                 | TTD                                        |
| C3      | C3      | CLOZAPINE                          |                                 | PharmGKB                                   |
| FCGR1A  | FCGR1A  | MDX-447                            |                                 | ChemblInteractions NCI                     |
| FCGR1A  | FCGR1A  | MDX-210                            |                                 | ChemblInteractions                         |
| FCGR1A  | FCGR1A  | CEP-11981                          |                                 | DTC                                        |
| RHBDF2  | RHBDF2  | FENTANYL                           |                                 | PharmGKB                                   |
| RHBDF2  | RHBDF2  | MORPHINE                           |                                 | PharmGKB                                   |
| RHBDF2  | RHBDF2  | OXYCODONE                          |                                 | PharmGKB                                   |
| HLA-A   | HLA-A   | TERBINAFINE                        |                                 | PharmGKB                                   |
| HLA-A   | HLA-A   | ZONISAMIDE                         |                                 | PharmGKB                                   |
| HLA-A   | HLA-A   | TICLOPIDINE                        |                                 | PharmGKB                                   |
| HLA-A   | HLA-A   | CARBAMAZEPINE                      |                                 | FDA                                        |
| HLA-A   | HLA-A   | RIBAVIRIN                          |                                 | PharmGKB                                   |
| HLA-A   | HLA-A   | VANCOMYCIN                         |                                 | PharmGKB                                   |
| HLA-A   | HLA-A   | LEVETIRACETAM                      |                                 | PharmGKB                                   |
| HLA-A   | HLA-A   | SERTRALINE                         |                                 | PharmGKB                                   |
| HLA-A   | HLA-A   | FENOFIBRATE                        |                                 | PharmGKB                                   |
| HLA-A   | HLA-A   | CLAVULANIC ACID                    |                                 | PharmGKB                                   |
| HLA-A   | HLA-A   | DAPSONE                            |                                 | PharmGKB                                   |
| HLA-A   | HLA-A   | IPILIMUMAB                         |                                 | PharmGKB FDA                               |
| HLA-A   | HLA-A   | AMPICILLIN                         |                                 | PharmGKB                                   |
| HLA-A   | HLA-A   | BACAMPICILLIN                      |                                 | PharmGKB                                   |
| HLA-A   | HLA-A   | AMOXICILLIN                        |                                 | PharmGKB                                   |
| CD40    | CD40    | RAVAGALIMAB                        |                                 | TTD                                        |
| CD40    | CD40    | ISCALIMAB                          | antibody                        | GuideToPharmacology TTD                    |
| CD40    | CD40    | LUCATUMUMAB                        |                                 | TdgClinicalTrial                           |
| CD40    | CD40    | TENELIXIMAB                        | partial agonist                 | ChemblInteractions                         |
| CD40    | CD40    | HYDROQUINONE                       |                                 | NCI                                        |
| CD40    | CD40    | APX-005M                           |                                 | TTD                                        |
| CD40    | CD40    | BLESELUMAB                         |                                 | TTD                                        |
| CD40    | CD40    | STREPTOZOCIN                       |                                 | NCI                                        |
| CD40    | CD40    | DACETUZUMAB                        | inhibitor                       | TdgClinicalTrial ChemblInteractions        |
| CD40    | CD40    | PG-102                             | inhibitor                       | ChemblInteractions                         |
| CD40    | CD40    | FLUDARABINE                        |                                 | NCI                                        |
| PRKAR2B | PRKAR2B | THEOPHYLLINE                       |                                 | NCI                                        |
| PSMB9   | PSMB9   | CARFILZOMIB                        | inhibitor                       | DTC MyCancerGenome ChemblInteractions      |
| PSMB9   | PSMB9   | KZR-616                            | inhibitor                       | GuideToPharmacology                        |
| PSMB9   | PSMB9   | OPROZOMIB                          | inhibitor                       | ChemblInteractions                         |
| PSMB9   | PSMB9   | BORTEZOMIB                         | inhibitor                       | DTC MyCancerGenome ChemblInteractions      |
| PSMB9   | PSMB9   | MARIZOMIB                          | inhibitor                       | ChemblInteractions                         |
| PSMB9   | PSMB9   | IXAZOMIB CITRATE                   | inhibitor                       | ChemblInteractions                         |
| GCGR    | GCGR    | SAR425899                          | agonist                         | ChemblInteractions TTD                     |
| GCGR    | GCGR    | REDIocide A                        |                                 | DTC                                        |
| GCGR    | GCGR    | LGD-6972                           |                                 | TTD                                        |
| GCGR    | GCGR    | GLUCAGON HYDROCHLORIDE RECOMBINANT | agonist                         | ChemblInteractions                         |
| GCGR    | GCGR    | GLUCAGON HYDROCHLORIDE             | agonist                         | ChemblInteractions                         |
| GCGR    | GCGR    | ADOMEGLIVANT                       | antagonist                      | GuideToPharmacology TTD                    |
| GCGR    | GCGR    | GLUCAGON                           | agonist                         | DTC ChemblInteractions GuideToPharmacology |
| GCGR    | GCGR    | PF-06291874                        | antagonist                      | ChemblInteractions TTD                     |
| GCGR    | GCGR    | MK-0893                            | antagonist allosteric modulator | DTC ChemblInteractions GuideToPharmacology |
| GCGR    | GCGR    | PEGAPAMODUTIDE                     |                                 | TTD                                        |
| GCGR    | GCGR    | CROTEDUMAB                         | antibody                        | GuideToPharmacology                        |

|         |         |                         |                    |                                                                  |
|---------|---------|-------------------------|--------------------|------------------------------------------------------------------|
| GCGR    | GCGR    | VOLAGIDEMAB             |                    | TTD                                                              |
| TRPV2   | TRPV2   | AMILORIDE               | blocker            | GuideToPharmacology                                              |
| TRPV2   | TRPV2   | CANNABIDIOL             | activator          | GuideToPharmacology                                              |
| CD1D    | CD1D    | RGI-7000                |                    | DTC                                                              |
| MAPK4   | MAPK4   | SORAFENIB               |                    | PharmGKB                                                         |
| LAMA4   | LAMA4   | OCRIPLASMIN             |                    | ChemblInteractions                                               |
| EPCAM   | EPCAM   | OPORTUZUMAB MONATOX     |                    | TdgClinicalTrial ChemblInteractions TTD                          |
| EPCAM   | EPCAM   | TUCOTUZUMAB CELMOLEUKIN |                    | ChemblInteractions                                               |
| EPCAM   | EPCAM   | ING-1                   |                    | TdgClinicalTrial ChemblInteractions TTD                          |
| EPCAM   | EPCAM   | ADECATUMUMAB            | inhibitor          | TdgClinicalTrial ChemblInteractions                              |
| EPCAM   | EPCAM   | TRASTUZUMAB             |                    | NCI                                                              |
| EPCAM   | EPCAM   | SOLITOMAB               | antibody           | TALC TdgClinicalTrial                                            |
| EPCAM   | EPCAM   | CITATUZUMAB BOGATOX     |                    | TdgClinicalTrial ChemblInteractions                              |
| EPCAM   | EPCAM   | CATUMAXOMAB             | ligand antibody    | TALC TdgClinicalTrial                                            |
| LST1    | LST1    | ABACAVIR                |                    | PharmGKB                                                         |
| IDO1    | IDO1    | PHENYLHYDRAZINE         |                    | DTC                                                              |
| IDO1    | IDO1    | LINRODOSTAT             | inhibitor          | GuideToPharmacology TTD                                          |
| IDO1    | IDO1    | 2-MERCAPTOBENZOTHAZOLE  |                    | DTC                                                              |
| IDO1    | IDO1    | PF-06840003             | inhibitor          | GuideToPharmacology TTD                                          |
| IDO1    | IDO1    | CHEMBL14145             |                    | DTC                                                              |
| IDO1    | IDO1    | EPACADOSTAT             | inhibitor          | ChemblInteractions GuideToPharmacology TTD                       |
| IDO1    | IDO1    | NECROSTATIN             | inhibitor          | GuideToPharmacology                                              |
| IDO1    | IDO1    | NORHARMANE              | inhibitor          | GuideToPharmacology                                              |
| IDO1    | IDO1    | CHEMBL1668301           |                    | DTC                                                              |
| IDO1    | IDO1    | TRYPTOPHAN              |                    | TTD                                                              |
| IDO1    | IDO1    | TRYPTANTHRIN            | inhibitor          | GuideToPharmacology                                              |
| IDO1    | IDO1    | CHEMBL1224312           |                    | DTC                                                              |
| IDO1    | IDO1    | NAVOXIMOD               | inhibitor          | GuideToPharmacology                                              |
| IDO1    | IDO1    | CHEMBL1933308           |                    | DTC                                                              |
| DIO1    | DIO1    | PROPYLTHIOURACIL        | inhibitor          | ChemblInteractions TTD                                           |
| XPNPEP2 | XPNPEP2 | TOSEDOSTAT              | inhibitor          | ChemblInteractions                                               |
| LGALS9  | LGALS9  | LACTOSE, ANHYDROUS      |                    | DTC                                                              |
| CSF3R   | CSF3R   | FILGRASTIM              | stimulator agonist | TdgClinicalTrial ChemblInteractions TEND GuideToPharmacology TTD |
| CSF3R   | CSF3R   | PEGFILGRASTIM           | agonist            | TdgClinicalTrial ChemblInteractions TEND GuideToPharmacology TTD |
| CSF3R   | CSF3R   | PEXIDARTINIB            |                    | TTD                                                              |
| CSF3R   | CSF3R   | RUXOLITINIB             |                    | JAX-CKB DoCM CIViC                                               |
| CSF3R   | CSF3R   | BALUGRASTIM             | agonist            | ChemblInteractions                                               |
| CSF3R   | CSF3R   | LIPEGFILGRASTIM         | agonist            | ChemblInteractions                                               |
| CSF3R   | CSF3R   | DASATINIB               |                    | CGI                                                              |
| CSF3R   | CSF3R   | PLX-5622                |                    | TTD                                                              |
| E2F1    | E2F1    | DIETHYLSTILBESTROL      |                    | NCI                                                              |
| E2F1    | E2F1    | CARMUSTINE              |                    | NCI                                                              |
| E2F1    | E2F1    | QUERCETIN               |                    | NCI                                                              |
| E2F1    | E2F1    | LARGAZOLE               |                    | DTC                                                              |
| E2F1    | E2F1    | VASOPRESSIN             |                    | NCI                                                              |
| E2F1    | E2F1    | ADRIAMYCIN              |                    | NCI                                                              |
| E2F1    | E2F1    | ACETYLCYSTEINE          |                    | NCI                                                              |
| E2F1    | E2F1    | IRINOTECAN              |                    | NCI                                                              |
| E2F1    | E2F1    | ETOPOSIDE               |                    | NCI                                                              |
| E2F1    | E2F1    | FLUOROURACIL            |                    | NCI                                                              |
| E2F1    | E2F1    | CISPLATIN               |                    | NCI                                                              |
| E2F1    | E2F1    | PRIMAQUINE              |                    | NCI                                                              |
| E2F1    | E2F1    | NICOTINE                |                    | NCI                                                              |
| E2F1    | E2F1    | METHOTREXATE            |                    | NCI                                                              |
| E2F1    | E2F1    | PACLITAXEL              |                    | NCI                                                              |
| E2F1    | E2F1    | BORTEZOMIB              |                    | NCI                                                              |
| MT1H    | MT1H    | CISPLATIN               |                    | NCI                                                              |
| MT1H    | MT1H    | STREPTOZOCIN            |                    | NCI                                                              |
| CYP2B6  | CYP2B6  | ARTEMISININ             |                    | PharmGKB                                                         |
| CYP2B6  | CYP2B6  | TAMOXIFEN               |                    | DTC                                                              |
| CYP2B6  | CYP2B6  | MITOTANE                |                    | PharmGKB                                                         |

|        |        |                        |           |                              |
|--------|--------|------------------------|-----------|------------------------------|
| CYP2B6 | CYP2B6 | METHADONE              |           | DTC PharmGKB                 |
| CYP2B6 | CYP2B6 | VORICONAZOLE           |           | DTC                          |
| CYP2B6 | CYP2B6 | ZIDOVUDINE             |           | PharmGKB                     |
| CYP2B6 | CYP2B6 | SORAFENIB              |           | PharmGKB                     |
| CYP2B6 | CYP2B6 | SIBUTRAMINE            | inhibitor | GuideToPharmacology          |
| CYP2B6 | CYP2B6 | MIDAZOLAM              |           | PharmGKB                     |
| CYP2B6 | CYP2B6 | PRASUGREL              |           | PharmGKB FDA                 |
| CYP2B6 | CYP2B6 | THIOTEPA               | inhibitor | GuideToPharmacology PharmGKB |
| CYP2B6 | CYP2B6 | PHENOBARBITAL          |           | NCI PharmGKB                 |
| CYP2B6 | CYP2B6 | TRAMADOL               |           | PharmGKB                     |
| CYP2B6 | CYP2B6 | RIFAMPIN               |           | PharmGKB                     |
| CYP2B6 | CYP2B6 | ISONIAZID              |           | PharmGKB                     |
| CYP2B6 | CYP2B6 | NICOTINE               |           | PharmGKB                     |
| CYP2B6 | CYP2B6 | BICALUTAMIDE           |           | NCI                          |
| CYP2B6 | CYP2B6 | CYCLOPHOSPHAMIDE       |           | NCI PharmGKB                 |
| CYP2B6 | CYP2B6 | TROFOSFAMIDE           |           | NCI                          |
| CYP2B6 | CYP2B6 | COLCHICINE             |           | NCI                          |
| CYP2B6 | CYP2B6 | CLOPIDOGREL            |           | DTC                          |
| CYP2B6 | CYP2B6 | ARTEMETHER             |           | PharmGKB                     |
| CYP2B6 | CYP2B6 | STAVUDINE              |           | PharmGKB                     |
| CYP2B6 | CYP2B6 | OSPEMIFENE             |           | PharmGKB FDA                 |
| CYP2B6 | CYP2B6 | SELEGILINE             |           | PharmGKB                     |
| CYP2B6 | CYP2B6 | IFOSFAMIDE             |           | PharmGKB                     |
| CYP2B6 | CYP2B6 | NEVIRAPINE             |           | NCI PharmGKB                 |
| CYP2B6 | CYP2B6 | LAMIVUDINE             |           | PharmGKB                     |
| CYP2B6 | CYP2B6 | EFAVIRENZ              |           | NCI FDA                      |
| CYP2B6 | CYP2B6 | PYRAZINAMIDE           |           | PharmGKB                     |
| CYP2B6 | CYP2B6 | CARBAMAZEPINE          |           | NCI PharmGKB                 |
| CYP2B6 | CYP2B6 | 6-O-BENZYLGUANINE      |           | NCI                          |
| CYP2B6 | CYP2B6 | PHENYTOIN              |           | PharmGKB                     |
| CYP2B6 | CYP2B6 | IMATINIB               |           | PharmGKB                     |
| CYP2B6 | CYP2B6 | MIRTAZAPINE            |           | PharmGKB                     |
| CYP2B6 | CYP2B6 | BUSULFAN               |           | PharmGKB                     |
| CYP2B6 | CYP2B6 | TESTOSTERONE           |           | NCI                          |
| CYP2B6 | CYP2B6 | TICLOPIDINE            | inhibitor | GuideToPharmacology PharmGKB |
| CYP2B6 | CYP2B6 | KETAMINE               |           | PharmGKB                     |
| CYP2B6 | CYP2B6 | CHEMBL530733           |           | DTC                          |
| CYP2B6 | CYP2B6 | DOXORUBICIN            |           | PharmGKB                     |
| CYP2B6 | CYP2B6 | RITONAVIR              |           | NCI                          |
| CYP2B6 | CYP2B6 | FLIBANSERIN            |           | PharmGKB                     |
| CYP2B6 | CYP2B6 | COTININE               |           | PharmGKB                     |
| CYP2B6 | CYP2B6 | SERTRALINE             |           | PharmGKB                     |
| CYP2B6 | CYP2B6 | MEPERIDINE             |           | PharmGKB                     |
| CYP2B6 | CYP2B6 | DIAZEPAM               |           | PharmGKB                     |
| CYP2B6 | CYP2B6 | ETHAMBUTOL             |           | PharmGKB                     |
| CYP2B6 | CYP2B6 | MEPHENYTOIN            |           | PharmGKB                     |
| TUBB2B | TUBB2B | BRENTUXIMAB VEDOTIN    | inhibitor | ChEMBLInteractions           |
| TUBB2B | TUBB2B | PODOFILOX              |           | DTC                          |
| TUBB2B | TUBB2B | CYCLOSTREPTIN          |           | DTC                          |
| TUBB2B | TUBB2B | CHEMBL1935538          |           | DTC                          |
| TUBB2B | TUBB2B | CHEMBL1795737          |           | DTC                          |
| TUBB2B | TUBB2B | SAGOPILONE             |           | ChEMBLInteractions           |
| TUBB2B | TUBB2B | VERUBULIN              |           | ChEMBLInteractions           |
| TUBB2B | TUBB2B | FOSBRETABULIN DISODIUM | inhibitor | ChEMBLInteractions           |
| TUBB2B | TUBB2B | ZAMPANOLIDE            |           | DTC                          |
| TUBB2B | TUBB2B | ABT-751                |           | DTC                          |
| TUBB2B | TUBB2B | COMBRETASTATIN A4      |           | DTC                          |
| TUBB2B | TUBB2B | PACLITAXEL             | inhibitor | DTC ChEMBLInteractions       |
| TUBB2B | TUBB2B | VINCRIStINE            |           | DTC                          |
| TUBB2B | TUBB2B | VINOReLBINE TARTRATE   | inhibitor | ChEMBLInteractions           |
| TUBB2B | TUBB2B | DOCETAXEL              | inhibitor | ChEMBLInteractions           |

|         |         |                            |                     |                                                         |
|---------|---------|----------------------------|---------------------|---------------------------------------------------------|
| TUBB2B  | TUBB2B  | IXABEPILONE                | inhibitor           | ChemblInteractions                                      |
| TUBB2B  | TUBB2B  | VINCRIStINE SULFATE        | inhibitor           | ChemblInteractions                                      |
| TUBB2B  | TUBB2B  | INDIBULIN                  | inhibitor           | ChemblInteractions                                      |
| TUBB2B  | TUBB2B  | CROLIBULIN                 | inhibitor           | ChemblInteractions                                      |
| TUBB2B  | TUBB2B  | VINBLASTINE                |                     | DTC                                                     |
| TUBB2B  | TUBB2B  | MAYTANSINE                 |                     | DTC                                                     |
| TUBB2B  | TUBB2B  | CHEMBL2036124              |                     | DTC                                                     |
| TUBB2B  | TUBB2B  | CURCUMIN                   |                     | DTC                                                     |
| TUBB2B  | TUBB2B  | CHEMBL2036119              |                     | DTC                                                     |
| TUBB2B  | TUBB2B  | PLINABULIN                 | inhibitor           | ChemblInteractions                                      |
| TUBB2B  | TUBB2B  | PAClitAXEL POLIGLUMEX      |                     | ChemblInteractions                                      |
| TUBB2B  | TUBB2B  | NOCODAZOLE                 |                     | DTC                                                     |
| TUBB2B  | TUBB2B  | CHEMBL453818               |                     | DTC                                                     |
| TUBB2B  | TUBB2B  | MAYTANSINOL                |                     | DTC                                                     |
| TUBB2B  | TUBB2B  | CABAZITAXEL                | inhibitor           | ChemblInteractions                                      |
| TUBB2B  | TUBB2B  | VINBLASTINE SULFATE        | inhibitor           | ChemblInteractions                                      |
| TUBB2B  | TUBB2B  | VORINOSTAT                 |                     | DTC                                                     |
| TUBB2B  | TUBB2B  | FOSBRETABULIN TROMETHAMINE |                     | ChemblInteractions                                      |
| TUBB2B  | TUBB2B  | VINORELBINE                |                     | DTC                                                     |
| TUBB2B  | TUBB2B  | ERIBULIN MESYLATE          | inhibitor           | ChemblInteractions                                      |
| TUBB2B  | TUBB2B  | LARGAZOLE                  |                     | DTC                                                     |
| TUBB2B  | TUBB2B  | COLCHICINE                 | inhibitor           | DTC ChemblInteractions                                  |
| TUBB2B  | TUBB2B  | VINFLUNINE                 | inhibitor           | ChemblInteractions                                      |
| TUBB2B  | TUBB2B  | LEXIBULIN                  | inhibitor           | ChemblInteractions                                      |
| TUBB2B  | TUBB2B  | TRASTUZUMAB EMTANSINE      | inhibitor           | ChemblInteractions                                      |
| TUBB2B  | TUBB2B  | DAVUNETIDE                 |                     | ChemblInteractions                                      |
| DNER    | DNER    | BIRABRESIB                 |                     | TTD                                                     |
| DNER    | DNER    | MOLIBRESIB                 |                     | TTD                                                     |
| DNER    | DNER    | BMS-986158                 |                     | TTD                                                     |
| DNER    | DNER    | MIVEBRESIB                 |                     | TTD                                                     |
| DNER    | DNER    | ALOBRESIB                  |                     | TTD                                                     |
| IGFBP3  | IGFBP3  | CELECOXIB                  |                     | PharmGKB                                                |
| IGFBP3  | IGFBP3  | FLUOROURACIL               |                     | PharmGKB                                                |
| SLC22A8 | SLC22A8 | PROBENECID                 | inhibitor           | DTC TdgClinicalTrial ChemblInteractions TEND TTD        |
| SLC22A8 | SLC22A8 | DICLOXACILLIN              |                     | DTC                                                     |
| SLC22A8 | SLC22A8 | BENZYLpenicILLIN           | inhibitor substrate | DTC                                                     |
| SLC22A8 | SLC22A8 | PRAVASTATIN                |                     | PharmGKB                                                |
| SLC22A8 | SLC22A8 | CEFOTAXIME                 |                     | PharmGKB                                                |
| SLC22A8 | SLC22A8 | CEPHALOTHIN                | inhibitor           | GuideToPharmacology                                     |
| SLC22A8 | SLC22A8 | FLUORESCeIN                |                     | TTD                                                     |
| SLC22A8 | SLC22A8 | OXACILLIN                  |                     | DTC                                                     |
| SLC22A8 | SLC22A8 | ZIDOVUDINE                 |                     | PharmGKB                                                |
| SLC22A8 | SLC22A8 | RUCAPARIB                  |                     | PharmGKB                                                |
| SLC22A8 | SLC22A8 | PRATOSARTAN                | inhibitor           | ChemblInteractions                                      |
| SLC22A8 | SLC22A8 | CEFAClor                   |                     | DTC                                                     |
| SLC22A8 | SLC22A8 | METHOTREXATE               |                     | PharmGKB                                                |
| TNNT2   | TNNT2   | PYROGALLOL RED             |                     | DTC                                                     |
| TNNT2   | TNNT2   | PURPUROGALLIN              |                     | DTC                                                     |
| TNNT2   | TNNT2   | CHEMBL1601846              |                     | DTC                                                     |
| SELPLG  | SELPLG  | INCLACUMAB                 |                     | TTD                                                     |
| SELPLG  | SELPLG  | NEIHULIZUMAB               |                     | TTD                                                     |
| RUNX3   | RUNX3   | LEUCOVORIN                 |                     | NCI                                                     |
| RUNX3   | RUNX3   | IRINOTECAN                 |                     | NCI                                                     |
| CD37    | CD37    | OTLERTUZUMAB               | antibody            | TdgClinicalTrial GuideToPharmacology TTD                |
| CD37    | CD37    | NARATUXIMAB EMTANSINE      |                     | TTD                                                     |
| PLA2G7  | PLA2G7  | DARAPLADIB                 | inhibitor           | TdgClinicalTrial ChemblInteractions GuideToPharmacology |
| PLA2G7  | PLA2G7  | RILAPLADIB                 | inhibitor           | ChemblInteractions GuideToPharmacology TTD              |
| PLA2G7  | PLA2G7  | EPOETIN BETA               |                     | NCI                                                     |
| SLC16A7 | SLC16A7 | METHOTREXATE               |                     | PharmGKB                                                |
| BTK     | BTK     | CHEMBL202721               |                     | DTC                                                     |
| BTK     | BTK     | TIRABRUTINIB               | inhibitor           | ChemblInteractions GuideToPharmacology TTD              |



|         |         |                         |                     |                                                                        |
|---------|---------|-------------------------|---------------------|------------------------------------------------------------------------|
| BTK     | BTK     | ZANUBRUTINIB            | inhibitor           | GuideToPharmacology TTD                                                |
| BTK     | BTK     | ACALABRUTINIB           | inhibitor           | GuideToPharmacology TTD                                                |
| BTK     | BTK     | MSC-2364447             | inhibitor           | ChemblInteractions                                                     |
| BTK     | BTK     | SPEBRUTINIB BESYLATE    | inhibitor           | TdgClinicalTrial ChemblInteractions TTD                                |
| BTK     | BTK     | CENISERTIB              | inhibitor           | TALC DTC MyCancerGenome                                                |
| BTK     | BTK     | HM-71224                | inhibitor           | ChemblInteractions                                                     |
| BTK     | BTK     | ABIVERTINIB             | inhibitor           | GuideToPharmacology                                                    |
| BTK     | BTK     | IBRUTINIB               | inhibitor           | DTC MyCancerGenome TdgClinicalTrial ChemblInteractions CGI DoCM COSMIC |
| BTK     | BTK     | ALISERTIB               |                     | DTC                                                                    |
| BTK     | BTK     | ILORASERTIB             |                     | DTC                                                                    |
| BTK     | BTK     | BRANEBRUTINIB           | inhibitor           | GuideToPharmacology                                                    |
| BTK     | BTK     | TAE-684                 |                     | DTC                                                                    |
| BTK     | BTK     | MLN-8054                |                     | DTC                                                                    |
| BTK     | BTK     | EVOBRUTINIB             | inhibitor           | GuideToPharmacology                                                    |
| BTK     | BTK     | R-406                   |                     | DTC                                                                    |
| BTK     | BTK     | CHEMBL1997335           |                     | DTC                                                                    |
| BTK     | BTK     | CHEMBL406845            |                     | DTC                                                                    |
| BTK     | BTK     | FENEBRUTINIB            | inhibitor           | GuideToPharmacology TTD                                                |
| BTK     | BTK     | BMS-986142              | inhibitor           | GuideToPharmacology TTD                                                |
| BTK     | BTK     | CHEMBL228043            | inhibitor           | GuideToPharmacology                                                    |
| BTK     | BTK     | SPEBRUTINIB             | inhibitor           | GuideToPharmacology                                                    |
| BTK     | BTK     | HESPERADIN              | inhibitor           | DTC                                                                    |
| BTK     | BTK     | VECABRUTINIB            | inhibitor           | GuideToPharmacology TTD                                                |
| BTK     | BTK     | RG-1530                 |                     | DTC                                                                    |
| BTK     | BTK     | VANDETANIB              |                     | DTC                                                                    |
| BTK     | BTK     | PD-0166285              |                     | DTC                                                                    |
| BTK     | BTK     | TOZASERTIB              |                     | DTC                                                                    |
| BTK     | BTK     | AZD-1152-HQPA           |                     | DTC                                                                    |
| BTK     | BTK     | POSELTINIB              | inhibitor           | GuideToPharmacology                                                    |
| BTK     | BTK     | PF-00562271             |                     | DTC                                                                    |
| BTK     | BTK     | ENTRECTINIB             |                     | DTC                                                                    |
| BTK     | BTK     | DOVITINIB               |                     | DTC                                                                    |
| BTK     | BTK     | DASATINIB               |                     | DTC                                                                    |
| HPD     | HPD     | NITISINONE              | inhibitor           | TdgClinicalTrial ChemblInteractions TEND TTD                           |
| SLC9A3  | SLC9A3  | TENAPANOR HYDROCHLORIDE | inhibitor           | ChemblInteractions TTD                                                 |
| SLC9A3  | SLC9A3  | ALBUMIN HUMAN           |                     | NCI                                                                    |
| TAPBP   | TAPBP   | ASPIRIN                 |                     | PharmGKB                                                               |
| ITGB2   | ITGB2   | ALCOHOL                 |                     | NCI                                                                    |
| ITGB2   | ITGB2   | SODIUM CHLORIDE         |                     | NCI                                                                    |
| ITGB2   | ITGB2   | MLNM-2201               | inhibitor           | ChemblInteractions                                                     |
| ITGB2   | ITGB2   | INDOMETHACIN            |                     | NCI                                                                    |
| ITGB2   | ITGB2   | ROVELIZUMAB             | antagonist antibody | ChemblInteractions GuideToPharmacology                                 |
| ITGB2   | ITGB2   | MYCOPHENOLATE MOFETIL   |                     | NCI                                                                    |
| ITGB2   | ITGB2   | EFALIZUMAB              | inhibitor           | ChemblInteractions                                                     |
| ITGB2   | ITGB2   | CYCLOPHOSPHAMIDE        |                     | NCI                                                                    |
| ITGB2   | ITGB2   | LIFITEGRAST             | antagonist          | ChemblInteractions                                                     |
| ITGB2   | ITGB2   | ERLIZUMAB               | negative modulator  | ChemblInteractions                                                     |
| ITGB2   | ITGB2   | ANTIBIOTIC              |                     | NCI                                                                    |
| ITGB2   | ITGB2   | PREDNISONE              |                     | NCI                                                                    |
| ITGB2   | ITGB2   | CYCLOSPORINE            |                     | NCI                                                                    |
| ITGB2   | ITGB2   | METHYLPREDNISOLONE      |                     | NCI                                                                    |
| ITGB2   | ITGB2   | COLCHICINE              |                     | NCI                                                                    |
| ITGB2   | ITGB2   | PENTOXIFYLLINE          |                     | NCI                                                                    |
| ITGB2   | ITGB2   | AME-133V                | inhibitor           | ChemblInteractions                                                     |
| ITGB2   | ITGB2   | BUTEIN                  |                     | NCI                                                                    |
| ITGB2   | ITGB2   | THALIDOMIDE             |                     | NCI                                                                    |
| PRF1    | PRF1    | ALDESLEUKIN             |                     | NCI                                                                    |
| PRF1    | PRF1    | EMAPALUMAB              |                     | PharmGKB FDA                                                           |
| RPS6KA6 | RPS6KA6 | CHEMBL573107            | inhibitor           | GuideToPharmacology TTD                                                |
| RPS6KA6 | RPS6KA6 | CEP-1347                |                     | DTC                                                                    |
| RPS6KA6 | RPS6KA6 | AT-9283                 | inhibitor           | GuideToPharmacology                                                    |

|         |         |                                      |           |                                         |
|---------|---------|--------------------------------------|-----------|-----------------------------------------|
| CTH     | CTH     | AMINOETHOXYVINYLGLYCINE              | inhibitor | GuideToPharmacology                     |
| CTH     | CTH     | BUSULFAN                             |           | PharmGKB                                |
| CTH     | CTH     | CYCLOPHOSPHAMIDE                     |           | PharmGKB                                |
| SLC47A2 | SLC47A2 | METFORMIN                            |           | PharmGKB                                |
| SLC47A2 | SLC47A2 | CIMETIDINE                           | inhibitor | GuideToPharmacology                     |
| SLC47A2 | SLC47A2 | RUCAPARIB                            |           | PharmGKB                                |
| CAV1    | CAV1    | ALCOHOL                              |           | NCI                                     |
| CAV1    | CAV1    | TESTOSTERONE                         |           | NCI                                     |
| KISS1R  | KISS1R  | TAK-448                              | agonist   | GuideToPharmacology                     |
| KISS1R  | KISS1R  | KISSPEPTIN-10                        | agonist   | GuideToPharmacology                     |
| KISS1R  | KISS1R  | BENZETHONIUM CHLORIDE                |           | DTC                                     |
| FMO5    | FMO5    | METFORMIN                            |           | PharmGKB                                |
| GZMA    | GZMA    | CYCLOSPORINE                         |           | NCI                                     |
| ANGPT2  | ANGPT2  | NESVACUMAB                           | inhibitor | TdgClinicalTrial ChemblInteractions TTD |
| ANGPT2  | ANGPT2  | MEDI-3617                            |           | TTD                                     |
| ANGPT2  | ANGPT2  | TREBANANIB                           | inhibitor | ChemblInteractions                      |
| ANGPT2  | ANGPT2  | RIBAVIRIN                            |           | NCI                                     |
| COL4A5  | COL4A5  | COLLAGENASE CLOSTRIDIUM HISTOLYTICUM |           | ChemblInteractions                      |
| COL4A5  | COL4A5  | OCRIPLASMIN                          |           | ChemblInteractions                      |
| VAV1    | VAV1    | EPOETIN ALFA                         |           | NCI                                     |
| KCNQ1   | KCNQ1   | INDAPAMIDE                           | inhibitor | TdgClinicalTrial TEND TTD               |
| KCNQ1   | KCNQ1   | CHEMBL298475                         | blocker   | GuideToPharmacology                     |
| KCNQ1   | KCNQ1   | BEPRIDIL                             | inhibitor | TdgClinicalTrial TEND                   |
| KCNQ1   | KCNQ1   | INSULIN                              |           | NCI                                     |
| KCNQ1   | KCNQ1   | NERISPIRDINE                         | blocker   | ChemblInteractions                      |
| KCNQ1   | KCNQ1   | EZOGABINE                            | blocker   | TdgClinicalTrial ChemblInteractions     |
| KCNQ1   | KCNQ1   | DOLASETRON                           |           | NCI                                     |
| KCNQ1   | KCNQ1   | INDOMETHACIN                         |           | TdgClinicalTrial                        |
| KCNQ1   | KCNQ1   | TEDISAMIL                            | blocker   | ChemblInteractions                      |
| KCNQ1   | KCNQ1   | DALFAMPRIDINE                        | blocker   | ChemblInteractions                      |
| KCNQ1   | KCNQ1   | CELECOXIB                            |           | PharmGKB                                |
| KCNQ1   | KCNQ1   | REPAGLINIDE                          |           | PharmGKB                                |
| KCNQ1   | KCNQ1   | GUANIDINE HYDROCHLORIDE              | blocker   | ChemblInteractions                      |
| KCNQ1   | KCNQ1   | TACROLIMUS                           |           | PharmGKB                                |
| ALB     | ALB     | RALTITREXED                          |           | NCI                                     |
| ALB     | ALB     | EBSELEN                              |           | TTD                                     |
| ALB     | ALB     | EPIGALOCATECHIN GALLATE              |           | DTC                                     |
| ALB     | ALB     | OXYPHENBUTAZONE                      |           | TTD                                     |
| ALB     | ALB     | PHENYLBUTAZONE                       |           | DTC                                     |
| ALB     | ALB     | EPIGALLOCATECHIN                     |           | DTC                                     |
| ALB     | ALB     | [19F]-HALOPERIDOL                    |           | DTC                                     |
| ALB     | ALB     | DIAZEPAM                             |           | DTC                                     |
| ALB     | ALB     | IODIPAMIDE                           |           | TTD                                     |
| ALB     | ALB     | (-)-EPICATECHIN                      |           | DTC                                     |
| ALB     | ALB     | PYROGALLOL                           |           | DTC                                     |
| ALB     | ALB     | AMODIAQUINE HYDROCHLORIDE            |           | DTC                                     |
| ALB     | ALB     | DICLOFENAC                           |           | DTC                                     |
| ALB     | ALB     | WARFARIN                             |           | DTC                                     |
| ALB     | ALB     | NAPROXEN                             |           | NCI                                     |
| ALB     | ALB     | OLMESARTAN MEDOXOMIL                 |           | DTC                                     |
| ALB     | ALB     | GADOFOSVESET                         |           | TTD                                     |
| ALB     | ALB     | CHEMBL1945287                        |           | DTC                                     |
| ALB     | ALB     | FLUCONAZOLE                          |           | DTC                                     |
| ALB     | ALB     | EPICATECHIN GALLATE                  |           | DTC                                     |
| ALB     | ALB     | COCHINCHINENIN C                     |           | DTC                                     |
| BMP7    | BMP7    | PEGASPARGASE                         |           | PharmGKB                                |
| BMP7    | BMP7    | METHOTREXATE                         |           | PharmGKB                                |
| BMP7    | BMP7    | CYCLOPHOSPHAMIDE                     |           | PharmGKB                                |
| BMP7    | BMP7    | THIOGUANINE                          |           | PharmGKB                                |
| BMP7    | BMP7    | PREDNISONE                           |           | PharmGKB                                |
| BMP7    | BMP7    | DEXAMETHASONE                        |           | PharmGKB                                |

|         |         |                                      |                         |                                                                                                   |
|---------|---------|--------------------------------------|-------------------------|---------------------------------------------------------------------------------------------------|
| BMP7    | BMP7    | CYTARABINE                           |                         | PharmGKB                                                                                          |
| BMP7    | BMP7    | VINCRIStINE                          |                         | PharmGKB                                                                                          |
| BMP7    | BMP7    | DAUNORUBICIN                         |                         | PharmGKB                                                                                          |
| BMP7    | BMP7    | DOXORUBICIN                          |                         | PharmGKB                                                                                          |
| ST6GAL1 | ST6GAL1 | FLOXACILLIN                          |                         | PharmGKB                                                                                          |
| ABAT    | ABAT    | VIGABATRIN                           | inhibitor               | TdgClinicalTrial ChembIInteractions TEND GuideToPharmacology TTD                                  |
| ABAT    | ABAT    | TIAGABINE                            |                         | TdgClinicalTrial TEND                                                                             |
| ABAT    | ABAT    | CHEMBL378577                         | inhibitor               | GuideToPharmacology                                                                               |
| ABAT    | ABAT    | CPP-115                              | inhibitor               | GuideToPharmacology TTD                                                                           |
| ABAT    | ABAT    | 4-HYDROXYBENZALDEHYDE                |                         | TTD                                                                                               |
| ABAT    | ABAT    | L-ALANINE                            | inhibitor               | TTD                                                                                               |
| ABAT    | ABAT    | VALPROIC ACID                        |                         | DTC                                                                                               |
| TBXAS1  | TBXAS1  | ASPIRIN                              |                         | PharmGKB                                                                                          |
| TBXAS1  | TBXAS1  | PYRIDINE                             |                         | TTD                                                                                               |
| TBXAS1  | TBXAS1  | OZAGREL                              | inhibitor               | GuideToPharmacology                                                                               |
| GRIK5   | GRIK5   | DYSIHERBAINE                         | agonist                 | GuideToPharmacology                                                                               |
| GRIK5   | GRIK5   | TEZAMPANEL                           |                         | TdgClinicalTrial                                                                                  |
| LTB4R   | LTB4R   | AMELUBANT                            | antagonist              | ChembIInteractions TTD                                                                            |
| LTB4R   | LTB4R   | SC-41390                             | antagonist              | GuideToPharmacology                                                                               |
| LTB4R   | LTB4R   | CP-195543                            | antagonist              | GuideToPharmacology TTD                                                                           |
| LTB4R   | LTB4R   | ETALOCIB                             | antagonist              | ChembIInteractions GuideToPharmacology                                                            |
| LTB4R   | LTB4R   | CHEMBL422420                         | antagonist              | GuideToPharmacology                                                                               |
| COL4A4  | COL4A4  | OCRIPLASMIN                          |                         | ChembIInteractions                                                                                |
| COL4A4  | COL4A4  | COLLAGENASE CLOSTRIDIUM HISTOLYTICUM |                         | ChembIInteractions                                                                                |
| SCN1B   | SCN1B   | ZONISAMIDE                           | inhibitor               | TdgClinicalTrial                                                                                  |
| HMOX1   | HMOX1   | SORAFENIB                            |                         | CIViC                                                                                             |
| HMOX1   | HMOX1   | SUNITINIB                            |                         | CIViC                                                                                             |
| HMOX1   | HMOX1   | STANNSOPORFIN                        |                         | TdgClinicalTrial TTD                                                                              |
| HMOX1   | HMOX1   | ASPIRIN                              |                         | NCI                                                                                               |
| TYMS    | TYMS    | OSI-7904                             |                         | TdgClinicalTrial                                                                                  |
| TYMS    | TYMS    | CAPECITABINE                         | inhibitor               | ClarityFoundationBiomarkers ClarityFoundationClinicalTrial ChembIInteractions GuideToPharmacology |
| TYMS    | TYMS    | METHOTREXATE                         | inhibitor               | CIViC                                                                                             |
| TYMS    | TYMS    | IRINOTECAN                           |                         | CIViC PharmGKB                                                                                    |
| TYMS    | TYMS    | HYDROCORTISONE                       |                         | NCI                                                                                               |
| TYMS    | TYMS    | TEGAFUR                              | inhibitor               | TdgClinicalTrial                                                                                  |
| TYMS    | TYMS    | FLUOROURACIL                         | other/unknown inhibitor | DTC ClarityFoundationClinicalTrial ChembIInteractions CIViC                                       |
| TYMS    | TYMS    | PEMETREXED                           | inhibitor               | ClarityFoundationBiomarkers TdgClinicalTrial TEND CIViC GuideToPharmacology                       |
| TYMS    | TYMS    | RALTITREXED                          | inhibitor               | TdgClinicalTrial TEND GuideToPharmacology PharmGKB                                                |
| TYMS    | TYMS    | INDOMETHACIN                         |                         | NCI                                                                                               |
| TYMS    | TYMS    | TAMOXIFEN                            |                         | NCI                                                                                               |
| TYMS    | TYMS    | DEXAMETHASONE                        |                         | NCI PharmGKB                                                                                      |
| TYMS    | TYMS    | HYDROXYCHLOROQUINE                   |                         | PharmGKB                                                                                          |
| TYMS    | TYMS    | ASPARAGINASE                         |                         | PharmGKB                                                                                          |
| TYMS    | TYMS    | DAUNORUBICIN                         |                         | NCI PharmGKB                                                                                      |
| TYMS    | TYMS    | CISPLATIN                            |                         | NCI                                                                                               |
| TYMS    | TYMS    | DEOXYURIDINE MONOPHOSPHATE           |                         | DTC                                                                                               |
| TYMS    | TYMS    | AZATHIOPRINE                         |                         | PharmGKB                                                                                          |
| TYMS    | TYMS    | FLOXURIDINE                          | inhibitor               | TdgClinicalTrial ClarityFoundationClinicalTrial ChembIInteractions TEND                           |
| TYMS    | TYMS    | ARFOLITIXORIN                        |                         | TdgClinicalTrial                                                                                  |
| TYMS    | TYMS    | 9-AMINOCAMPTOTHECIN                  |                         | NCI                                                                                               |
| TYMS    | TYMS    | PLATINUM                             |                         | PharmGKB                                                                                          |
| TYMS    | TYMS    | LEUCOVORIN                           |                         | TdgClinicalTrial TEND                                                                             |
| TYMS    | TYMS    | DOXIFLURIDINE                        |                         | NCI                                                                                               |
| TYMS    | TYMS    | RESERPINE                            |                         | NCI                                                                                               |
| TYMS    | TYMS    | TOPOTECAN                            |                         | NCI                                                                                               |
| TYMS    | TYMS    | PREDNISONE                           |                         | PharmGKB                                                                                          |
| TYMS    | TYMS    | AZACITIDINE                          |                         | PharmGKB                                                                                          |
| TYMS    | TYMS    | ENILURACIL                           |                         | NCI                                                                                               |
| TYMS    | TYMS    | CARBOGEN                             |                         | NCI                                                                                               |
| TYMS    | TYMS    | PHENTOLAMINE                         |                         | NCI                                                                                               |
| TYMS    | TYMS    | SULFASALAZINE                        |                         | PharmGKB                                                                                          |

|          |          |                                       |          |
|----------|----------|---------------------------------------|----------|
| TYMS     | TYMS     | ETOPOSIDE                             | PharmGKB |
| TYMS     | TYMS     | CYTARABINE                            | PharmGKB |
| TYMS     | TYMS     | VINCRIStINE                           | NCI      |
| TYMS     | TYMS     | THYMIDINE MONOPHOSPHATE               | DTC      |
| TYMS     | TYMS     | VERAPAMIL                             | NCI      |
| APOBEC3G | APOBEC3G | CHEMBL1388703                         | DTC      |
| APOBEC3G | APOBEC3G | SCOULERINE                            | DTC      |
| APOBEC3G | APOBEC3G | CHEMBL122355                          | DTC      |
| APOBEC3G | APOBEC3G | CHEMBL601550                          | DTC      |
| APOBEC3G | APOBEC3G | CHEMBL410484                          | DTC      |
| APOBEC3G | APOBEC3G | CHEMBL1520346                         | DTC      |
| APOBEC3G | APOBEC3G | CHEMBL1451921                         | DTC      |
| APOBEC3G | APOBEC3G | CHEMBL584635                          | DTC      |
| APOBEC3G | APOBEC3G | CEFOTETAN                             | DTC      |
| APOBEC3G | APOBEC3G | CHEMBL124006                          | DTC      |
| APOBEC3G | APOBEC3G | CHEMBL609606                          | DTC      |
| APOBEC3G | APOBEC3G | CHEMBL605003                          | DTC      |
| APOBEC3G | APOBEC3G | CHEMBL582287                          | DTC      |
| APOBEC3G | APOBEC3G | CHEMBL589421                          | DTC      |
| APOBEC3G | APOBEC3G | CHEMBL576409                          | DTC      |
| APOBEC3G | APOBEC3G | CHEMBL103583                          | DTC      |
| APOBEC3G | APOBEC3G | 2,3,4,4'-TETRAMETHOXYBIPHENYL         | DTC      |
| APOBEC3G | APOBEC3G | CHEMBL584442                          | DTC      |
| APOBEC3G | APOBEC3G | PYRONIN Y                             | DTC      |
| APOBEC3G | APOBEC3G | MYRICETIN                             | DTC      |
| APOBEC3G | APOBEC3G | CHEMBL72365                           | DTC      |
| APOBEC3G | APOBEC3G | CHEMBL116548                          | DTC      |
| APOBEC3G | APOBEC3G | CHEMBL582675                          | DTC      |
| APOBEC3G | APOBEC3G | MICHLER'S KETONE                      | DTC      |
| APOBEC3G | APOBEC3G | SB-216763                             | DTC      |
| APOBEC3G | APOBEC3G | CHEMBL585240                          | DTC      |
| APOBEC3G | APOBEC3G | SEMAXANIB                             | DTC      |
| APOBEC3G | APOBEC3G | CHEMBL118678                          | DTC      |
| APOBEC3G | APOBEC3G | GLAUCINE METHIODIDE                   | DTC      |
| APOBEC3G | APOBEC3G | CHEMBL590706                          | DTC      |
| APOBEC3G | APOBEC3G | CHEMBL277148                          | DTC      |
| APOBEC3G | APOBEC3G | BENZOQUINONE                          | DTC      |
| APOBEC3G | APOBEC3G | CHEMBL584514                          | DTC      |
| APOBEC3G | APOBEC3G | 3-O-METHYLQUERCETIN                   | DTC      |
| APOBEC3G | APOBEC3G | CHEMBL1287981                         | DTC      |
| APOBEC3G | APOBEC3G | CHEMBL586670                          | DTC      |
| APOBEC3G | APOBEC3G | CHEMBL589711                          | DTC      |
| APOBEC3G | APOBEC3G | CHEMBL1390716                         | DTC      |
| APOBEC3G | APOBEC3G | CHEMBL600360                          | DTC      |
| APOBEC3G | APOBEC3G | CHEMBL600306                          | DTC      |
| APOBEC3G | APOBEC3G | CGS-15943                             | DTC      |
| APOBEC3G | APOBEC3G | CHEMBL600692                          | DTC      |
| APOBEC3G | APOBEC3G | DIMETHYLPHENYLPiPERAZINIUM IODIDE     | DTC      |
| APOBEC3G | APOBEC3G | STILONIUM IODIDE                      | DTC      |
| APOBEC3G | APOBEC3G | CHEMBL88147                           | DTC      |
| APOBEC3G | APOBEC3G | CHEMBL578504                          | DTC      |
| APOBEC3G | APOBEC3G | APOMORPHINE HYDROCHLORIDE HEMIHYDRATE | DTC      |
| APOBEC3G | APOBEC3G | ELLIPTECINE                           | DTC      |
| APOBEC3G | APOBEC3G | CHEMBL429095                          | DTC      |
| APOBEC3G | APOBEC3G | CHEMBL192626                          | DTC      |
| APOBEC3G | APOBEC3G | CHEMBL601744                          | DTC      |
| APOBEC3G | APOBEC3G | CHEMBL592314                          | DTC      |
| APOBEC3G | APOBEC3G | CHEMBL428064                          | DTC      |
| APOBEC3G | APOBEC3G | PROTOAPIGENONE                        | DTC      |
| APOBEC3G | APOBEC3G | CHEMBL1255944                         | DTC      |
| APOBEC3G | APOBEC3G | CHEMBL609438                          | DTC      |

|          |          |                           |                    |                                                                                     |
|----------|----------|---------------------------|--------------------|-------------------------------------------------------------------------------------|
| APOBEC3G | APOBEC3G | CHEMBL584849              |                    | DTC                                                                                 |
| APOBEC3G | APOBEC3G | CHEMBL313737              |                    | DTC                                                                                 |
| CD52     | CD52     | ALEMTUZUMAB               | antibody inhibitor | MyCancerGenome TdgClinicalTrial ChemblInteractions NCI TEND GuideToPharmacology TTD |
| GZMB     | GZMB     | HEXACHLOROPHENE           |                    | DTC                                                                                 |
| BMPR1B   | BMPR1B   | GALUNISERTIB              | inhibitor          | GuideToPharmacology                                                                 |
| HCK      | HCK      | XL-228                    | inhibitor          | ChemblInteractions                                                                  |
| HCK      | HCK      | CHEMBL406845              |                    | DTC                                                                                 |
| HCK      | HCK      | DASATINIB                 | inhibitor          | DTC ChemblInteractions                                                              |
| HCK      | HCK      | MASITINIB                 |                    | TdgClinicalTrial                                                                    |
| HCK      | HCK      | BOSUTINIB                 | inhibitor          | ChemblInteractions                                                                  |
| HCK      | HCK      | ENMD-981693               | inhibitor          | ChemblInteractions                                                                  |
| HCK      | HCK      | HESPERADIN                | inhibitor          | DTC                                                                                 |
| HCK      | HCK      | NINTEDANIB                | inhibitor          | TALC                                                                                |
| HCK      | HCK      | MLN-8054                  |                    | DTC                                                                                 |
| HCK      | HCK      | TG100-801                 | inhibitor          | ChemblInteractions                                                                  |
| HCK      | HCK      | GEFITINIB                 |                    | DTC                                                                                 |
| HCK      | HCK      | AST-487                   |                    | DTC                                                                                 |
| HCK      | HCK      | ILORASERTIB               | inhibitor          | ChemblInteractions                                                                  |
| HCK      | HCK      | PEXMETINIB                | inhibitor          | GuideToPharmacology                                                                 |
| HCK      | HCK      | R-406                     |                    | DTC                                                                                 |
| HCK      | HCK      | IMATINIB MESYLATE         |                    | NCI                                                                                 |
| HCK      | HCK      | DORAMAPIMOD               |                    | TTD                                                                                 |
| HCK      | HCK      | IBRUTINIB                 | inhibitor          | GuideToPharmacology                                                                 |
| HCK      | HCK      | DOVITINIB                 |                    | DTC                                                                                 |
| HCK      | HCK      | PF-00562271               |                    | DTC                                                                                 |
| THRB     | THRB     | MB07811                   | agonist            | TdgClinicalTrial ChemblInteractions TTD                                             |
| THRB     | THRB     | DEXTROTHYROXINE           | agonist            | ChemblInteractions GuideToPharmacology                                              |
| THRB     | THRB     | LEVOTHYROXINE             | agonist            | DTC TdgClinicalTrial TEND                                                           |
| THRB     | THRB     | CHEMBL297304              |                    | DTC                                                                                 |
| THRB     | THRB     | CHEMBL1397308             |                    | DTC                                                                                 |
| THRB     | THRB     | ERYTHROSINE               |                    | DTC                                                                                 |
| THRB     | THRB     | ROSE BENGAL               |                    | DTC                                                                                 |
| THRB     | THRB     | PROTOPORPHYRIN            |                    | DTC                                                                                 |
| THRB     | THRB     | CHEMBL581044              |                    | DTC                                                                                 |
| THRB     | THRB     | 3-METHYLCHOLANTHRENE      |                    | DTC                                                                                 |
| THRB     | THRB     | WEDELOLACTONE             |                    | DTC                                                                                 |
| THRB     | THRB     | SHIKONIN                  |                    | DTC                                                                                 |
| THRB     | THRB     | TIRATRICOL                | agonist            | GuideToPharmacology TTD                                                             |
| THRB     | THRB     | AMMONIA SOLUTION, STRONG  |                    | DTC                                                                                 |
| THRB     | THRB     | HYPERICIN                 |                    | DTC                                                                                 |
| THRB     | THRB     | DOXORUBICIN HYDROCHLORIDE |                    | DTC                                                                                 |
| THRB     | THRB     | SOBETIROME                | agonist            | TdgClinicalTrial GuideToPharmacology                                                |
| THRB     | THRB     | PRIMAQUINE PHOSPHATE      |                    | DTC                                                                                 |
| THRB     | THRB     | TOLONIUM CHLORIDE         |                    | DTC                                                                                 |
| THRB     | THRB     | METHYLTHIONINIUM CHLORIDE |                    | DTC                                                                                 |
| THRB     | THRB     | LIOTHYRONINE              | agonist            | TdgClinicalTrial ChemblInteractions TEND                                            |
| THRB     | THRB     | DEXTROTHYROXINE SODIUM    | agonist            | ChemblInteractions                                                                  |
| THRB     | THRB     | CHEMBL602969              |                    | DTC                                                                                 |
| THRB     | THRB     | ORTHO-PHTHALALDEHYDE      |                    | DTC                                                                                 |
| THRB     | THRB     | ZIRAM                     |                    | DTC                                                                                 |
| THRB     | THRB     | DAUNORUBICIN              |                    | DTC                                                                                 |
| THRB     | THRB     | ISOTRETINOIN              |                    | DTC                                                                                 |
| THRB     | THRB     | RHAMNETIN                 |                    | DTC                                                                                 |
| THRB     | THRB     | OXYTETRACYCLINE           |                    | DTC                                                                                 |
| THRB     | THRB     | LIOTHYRONINE SODIUM       | agonist            | ChemblInteractions GuideToPharmacology                                              |
| THRB     | THRB     | EPROTIROME                | agonist            | TdgClinicalTrial ChemblInteractions                                                 |
| THRB     | THRB     | CHEMBL601952              |                    | DTC                                                                                 |
| THRB     | THRB     | CHEMBL426404              |                    | DTC                                                                                 |
| THRB     | THRB     | SLAZINIC ACID             |                    | DTC                                                                                 |
| THRB     | THRB     | CHEMBL1493528             |                    | DTC                                                                                 |
| THRB     | THRB     | DITHIAZANINE IODIDE       |                    | DTC                                                                                 |

|      |      |                            |         |                                         |
|------|------|----------------------------|---------|-----------------------------------------|
| THRB | THRB | ROSMARINIC ACID            |         | DTC                                     |
| THRB | THRB | QUINALDINE BLUE            |         | DTC                                     |
| THRB | THRB | CHEMBL1341830              |         | DTC                                     |
| THRB | THRB | CIRAZOLINE                 |         | DTC                                     |
| THRB | THRB | PYRACLOSTROBIN             |         | DTC                                     |
| THRB | THRB | METHYL PARATHIONE          |         | DTC                                     |
| THRB | THRB | QUININE                    |         | DTC                                     |
| THRB | THRB | BENZO(K)FLUORANTHENE       |         | DTC                                     |
| THRB | THRB | DIENOCHLOR                 |         | DTC                                     |
| THRB | THRB | RESMETIROM                 | agonist | TdgClinicalTrial ChemblInteractions TTD |
| THRB | THRB | DIPYRIDAMOLE               |         | DTC                                     |
| THRB | THRB | GOSSYPOL                   |         | DTC                                     |
| THRB | THRB | CHEMBL584508               |         | DTC                                     |
| THRB | THRB | METHYLENE BLUE             |         | DTC                                     |
| THRB | THRB | WORTMANNIN                 |         | DTC                                     |
| THRB | THRB | CHEMBL1465049              |         | DTC                                     |
| THRB | THRB | TRIAMTERENE                |         | DTC                                     |
| THRB | THRB | AZORUBINE                  |         | DTC                                     |
| THRB | THRB | CHEMBL578741               |         | DTC                                     |
| THRB | THRB | QUINALIZARIN               |         | DTC                                     |
| THRB | THRB | LEVOTHYROXINE SODIUM       | agonist | ChemblInteractions GuideToPharmacology  |
| THRB | THRB | 3R14S-OCHRATOXIN A         |         | DTC                                     |
| THRB | THRB | CLOSANTEL                  |         | DTC                                     |
| THRB | THRB | CHEMBL429095               |         | DTC                                     |
| THRB | THRB | DEPHOSTATIN                |         | DTC                                     |
| THRB | THRB | FUMARPROTOCETRARIC ACID    |         | DTC                                     |
| THRB | THRB | CHEMBL592124               |         | DTC                                     |
| THRB | THRB | BENZO[B]FLUORANTHENE       |         | DTC                                     |
| THRB | THRB | CHEMBL211670               |         | DTC                                     |
| THRB | THRB | QUINPIROLE                 |         | DTC                                     |
| THRB | THRB | 4-METHOXYCINNAMIC ACID     |         | DTC                                     |
| THRB | THRB | CHEMBL87568                |         | DTC                                     |
| THRB | THRB | AXITIROME                  |         | TTD                                     |
| THRB | THRB | CHLOROPHENYLPIPERAZINE     |         | DTC                                     |
| THRB | THRB | CHEMBL577415               |         | DTC                                     |
| THRB | THRB | OXYCARBOXIN                |         | DTC                                     |
| THRB | THRB | SPIRONOLACTONE             |         | DTC                                     |
| THRB | THRB | TETRAIDOFLUORESCEIN        |         | DTC                                     |
| THRB | THRB | HOMIDIUM BROMIDE           |         | DTC                                     |
| THRB | THRB | INAMRINONE                 |         | DTC                                     |
| THRB | THRB | METHYLENE BLUE             |         | DTC                                     |
| THRB | THRB | CHEMBL1451216              |         | DTC                                     |
| THRB | THRB | CHEMBL533293               |         | DTC                                     |
| THRB | THRB | ANAZOLENE                  |         | DTC                                     |
| THRB | THRB | CARUBICIN                  |         | DTC                                     |
| THRB | THRB | PICEATANNOL                |         | DTC                                     |
| THRB | THRB | DIBENZ[A,H]ANTHRACENE      |         | DTC                                     |
| THRB | THRB | IDARUBICIN                 |         | DTC                                     |
| THRB | THRB | HOMIDIUM                   |         | DTC                                     |
| THRB | THRB | ACID BLUE 129              |         | DTC                                     |
| THRB | THRB | DYCLONINE HYDROCHLORIDE    |         | DTC                                     |
| THRB | THRB | BAICALEIN                  |         | DTC                                     |
| THRB | THRB | CHEMBL603024               |         | DTC                                     |
| THRB | THRB | JUGLONE                    |         | DTC                                     |
| THRB | THRB | METHACYCLINE HYDROCHLORIDE |         | DTC                                     |
| THRB | THRB | DACTINOMYCIN               |         | DTC                                     |
| THRB | THRB | DAUNORUBICIN HYDROCHLORIDE |         | DTC                                     |
| THRB | THRB | GENTIAN VIOLET             |         | DTC                                     |
| THRB | THRB | HEXACHLOROPHENE            |         | DTC                                     |
| THRB | THRB | LOMOFUNGIN                 |         | DTC                                     |
| THRB | THRB | OXIDOPAMINE                |         | DTC                                     |

|         |         |                        |                    |                                                             |
|---------|---------|------------------------|--------------------|-------------------------------------------------------------|
| THRB    | THRB    | CHLOROTHALONIL         |                    |                                                             |
| PLK2    | PLK2    | ONVANSERTIB            | inhibitor          | DTC                                                         |
| PLK2    | PLK2    | BI-2536                | inhibitor          | GuideToPharmacology                                         |
| PLK2    | PLK2    | WORTMANNIN             |                    | GuideToPharmacology                                         |
| P2RY1   | P2RY1   | ASPIRIN                |                    | DTC                                                         |
| P2RY1   | P2RY1   | ADENOSINE DIPHOSPHATE  | agonist            | PharmGKB                                                    |
| P2RY1   | P2RY1   | SURAMIN                | antagonist         | GuideToPharmacology                                         |
| P2RY1   | P2RY1   | ADENOSINE TRIPHOSPHATE | agonist antagonist | GuideToPharmacology                                         |
| P2RY1   | P2RY1   | ISO-IANATHERAN A       |                    | GuideToPharmacology                                         |
| PPP1R18 | PPP1R18 | CARBOPLATIN            |                    | DTC                                                         |
| PPP1R18 | PPP1R18 | GEMCITABINE            |                    | PharmGKB                                                    |
| HOMER1  | HOMER1  | LEVODOPA               |                    | PharmGKB                                                    |
| HOMER1  | HOMER1  | HALOPERIDOL            |                    | PharmGKB                                                    |
| JAK3    | JAK3    | AT-9283                | inhibitor          | TALC ChemblInteractions GuideToPharmacology                 |
| JAK3    | JAK3    | CERDULATINIB           | inhibitor          | ChemblInteractions GuideToPharmacology TTD                  |
| JAK3    | JAK3    | PACRITINIB             | inhibitor          | GuideToPharmacology                                         |
| JAK3    | JAK3    | R-406                  |                    | DTC                                                         |
| JAK3    | JAK3    | CHEMBL1997335          |                    | DTC                                                         |
| JAK3    | JAK3    | NS-018                 | inhibitor          | GuideToPharmacology                                         |
| JAK3    | JAK3    | SOLCITINIB             | inhibitor          | GuideToPharmacology                                         |
| JAK3    | JAK3    | LAUROGUADINE           |                    | DTC                                                         |
| JAK3    | JAK3    | PF-00562271            |                    | DTC                                                         |
| JAK3    | JAK3    | GO-6976                |                    | DTC                                                         |
| JAK3    | JAK3    | RG-1530                |                    | DTC                                                         |
| JAK3    | JAK3    | PEFICITINIB            | inhibitor          | TdgClinicalTrial ChemblInteractions GuideToPharmacology TTD |
| JAK3    | JAK3    | ACALABRUTINIB          | inhibitor          | GuideToPharmacology                                         |
| JAK3    | JAK3    | OCLACITINIB            | inhibitor          | GuideToPharmacology                                         |
| JAK3    | JAK3    | RUXOLITINIB            | inhibitor          | DTC JAX-CKB GuideToPharmacology                             |
| JAK3    | JAK3    | BREPOCITINIB           | inhibitor          | GuideToPharmacology                                         |
| JAK3    | JAK3    | TOFACITINIB            | inhibitor          | DTC JAX-CKB CIViC GuideToPharmacology TTD                   |
| JAK3    | JAK3    | IBRUTINIB              | inhibitor          | GuideToPharmacology                                         |
| JAK3    | JAK3    | UPADACITINIB           | inhibitor          | GuideToPharmacology                                         |
| JAK3    | JAK3    | CYC-116                |                    | DTC                                                         |
| JAK3    | JAK3    | R-333                  | inhibitor          | ChemblInteractions                                          |
| JAK3    | JAK3    | CENISERTIB             |                    | DTC                                                         |
| JAK3    | JAK3    | AZD-1480               | inhibitor          | GuideToPharmacology                                         |
| JAK3    | JAK3    | MOMELOTINIB            | inhibitor          | GuideToPharmacology                                         |
| JAK3    | JAK3    | TOFACITINIB CITRATE    | inhibitor          | ChemblInteractions                                          |
| JAK3    | JAK3    | DECERNOTINIB           | inhibitor          | TdgClinicalTrial ChemblInteractions GuideToPharmacology TTD |
| JAK3    | JAK3    | CHEMBL379975           |                    | DTC                                                         |
| JAK3    | JAK3    | POSELTINIB             | inhibitor          | GuideToPharmacology                                         |
| JAK3    | JAK3    | JNJ-7706621            |                    | DTC                                                         |
| JAK3    | JAK3    | GW843682X              |                    | DTC                                                         |
| JAK3    | JAK3    | GANDOTINIB             | inhibitor          | GuideToPharmacology                                         |
| JAK3    | JAK3    | TRICETAMIDE            | inhibitor          | ChemblInteractions                                          |
| JAK3    | JAK3    | FEDRATINIB             | inhibitor          | GuideToPharmacology                                         |
| JAK3    | JAK3    | BMS-911543             | inhibitor          | GuideToPharmacology                                         |
| JAK3    | JAK3    | WHI-P131               | inhibitor          | ChemblInteractions                                          |
| JAK3    | JAK3    | ENTRECTINIB            |                    | DTC                                                         |
| JAK3    | JAK3    | R-348                  | inhibitor          | ChemblInteractions                                          |
| JAK3    | JAK3    | XELJANZ                | inhibitor          | MyCancerGenome                                              |
| JAK3    | JAK3    | PF-06651600            | inhibitor          | TTD                                                         |
| JAK3    | JAK3    | ABIVERTINIB            | inhibitor          | GuideToPharmacology                                         |
| JAK3    | JAK3    | DELGOCITINIB           | inhibitor          | GuideToPharmacology                                         |
| JAK3    | JAK3    | XL-019                 | inhibitor          | GuideToPharmacology                                         |
| JAK3    | JAK3    | TAE-684                |                    | DTC                                                         |
| JAK3    | JAK3    | ADAVOSERTIB            |                    | DTC                                                         |
| JAK3    | JAK3    | SOTRASTAUIN            |                    | DTC                                                         |
| JAK3    | JAK3    | PD-0166285             |                    | DTC                                                         |
| JAK3    | JAK3    | CHEMBL225519           |                    | DTC                                                         |
| JAK3    | JAK3    | TASOCITINIB            |                    | TdgClinicalTrial                                            |

|         |         |                                |                      |                                                                   |
|---------|---------|--------------------------------|----------------------|-------------------------------------------------------------------|
| JAK3    | JAK3    | BARICITINIB                    | inhibitor            | GuideToPharmacology                                               |
| JAK3    | JAK3    | CHEMBL2062804                  | inhibitor            | GuideToPharmacology                                               |
| JAK3    | JAK3    | FILGOTINIB                     | inhibitor            | GuideToPharmacology                                               |
| JAK3    | JAK3    | ATEZOLIZUMAB                   |                      | CIViC                                                             |
| PTP4A3  | PTP4A3  | CETUXIMAB                      |                      | CIViC                                                             |
| PTP4A3  | PTP4A3  | EMODIN                         |                      | DTC                                                               |
| CD2     | CD2     | ALEFACEPT                      | inhibitor            | TdgClinicalTrial ChembllInteractions TEND GuideToPharmacology     |
| CD2     | CD2     | SIPLIZUMAB                     | inhibitor            | TdgClinicalTrial ChembllInteractions TTD                          |
| CD2     | CD2     | ALDESLEUKIN                    |                      | NCI                                                               |
| LDHA    | LDHA    | CHEMBL2058994                  |                      | DTC                                                               |
| SLC36A2 | SLC36A2 | OXITRIPTAN                     | inhibitor            | GuideToPharmacology                                               |
| PROZ    | PROZ    | MENADIONE                      | activator            | TEND                                                              |
| PPP1R1A | PPP1R1A | INSULIN                        |                      | NCI                                                               |
| SLC5A2  | SLC5A2  | CANAGLIFLOZIN                  | inhibitor            | TdgClinicalTrial GuideToPharmacology                              |
| SLC5A2  | SLC5A2  | EMPAGLIFLOZIN                  | antagonist inhibitor | TdgClinicalTrial ChembllInteractions GuideToPharmacology          |
| SLC5A2  | SLC5A2  | ERTUGLIFLOZIN                  | antagonist inhibitor | ChembllInteractions GuideToPharmacology                           |
| SLC5A2  | SLC5A2  | IPRAGLIFLOZIN                  | inhibitor            | TdgClinicalTrial GuideToPharmacology                              |
| SLC5A2  | SLC5A2  | SOTAGLIFLOZIN                  | inhibitor            | ChembllInteractions GuideToPharmacology                           |
| SLC5A2  | SLC5A2  | TOFOGLIFLOZIN                  | inhibitor            | ChembllInteractions GuideToPharmacology                           |
| SLC5A2  | SLC5A2  | DAPAGLIFLOZIN                  | antagonist inhibitor | TdgClinicalTrial GuideToPharmacology                              |
| SLC5A2  | SLC5A2  | REMOGLIFLOZIN ETABONATE        | inhibitor            | ChembllInteractions                                               |
| SLC5A2  | SLC5A2  | LICOGLIFLOZIN                  | inhibitor            | GuideToPharmacology                                               |
| SLC5A2  | SLC5A2  | REMOGLIFLOZIN                  | inhibitor            | GuideToPharmacology                                               |
| SLC5A2  | SLC5A2  | BEXAGLIFLOZIN                  | inhibitor            | ChembllInteractions                                               |
| SLC5A2  | SLC5A2  | CANAGLIFLOZIN                  | inhibitor            | ChembllInteractions                                               |
| SLC5A2  | SLC5A2  | DAPAGLIFLOZIN PROPYLENE GLYCOL | inhibitor            | ChembllInteractions                                               |
| SLC5A2  | SLC5A2  | GLUFOSFAMIDE                   |                      | TdgClinicalTrial                                                  |
| SLC5A2  | SLC5A2  | SERGLIFLOZIN ETABONATE         | inhibitor            | GuideToPharmacology                                               |
| CXCR3   | CXCR3   | DIOSCIN                        | antagonist           | GuideToPharmacology                                               |
| ITGAL   | ITGAL   | CASEARINONE B                  |                      | DTC                                                               |
| ITGAL   | ITGAL   | BUSULFAN                       |                      | NCI                                                               |
| ITGAL   | ITGAL   | LIFITEGRAST                    | antagonist           | ChembllInteractions GuideToPharmacology TTD                       |
| ITGAL   | ITGAL   | EFALIZUMAB                     | inhibitor antibody   | TdgClinicalTrial ChembllInteractions TEND GuideToPharmacology TTD |
| ITGAL   | ITGAL   | FLUOROURACIL                   |                      | NCI                                                               |
| ITGAL   | ITGAL   | CASEARINOL B                   |                      | DTC                                                               |
| ITGAL   | ITGAL   | EPOETIN ALFA                   |                      | NCI                                                               |
| ITGAL   | ITGAL   | ETOPOSIDE                      |                      | NCI                                                               |
| ITGAL   | ITGAL   | CASEARINONE A                  |                      | DTC                                                               |
| ITGAL   | ITGAL   | ROVELIZUMAB                    | antibody antagonist  | ChembllInteractions GuideToPharmacology                           |
| ITGAL   | ITGAL   | ODULIMOMAB                     | inhibitor            | ChembllInteractions                                               |
| ITGAL   | ITGAL   | CYCLOSPORINE                   |                      | NCI                                                               |
| ITGAL   | ITGAL   | THROMBIN                       |                      | NCI                                                               |
| ITGAL   | ITGAL   | CYCLOPHOSPHAMIDE               |                      | NCI                                                               |
| ITGAL   | ITGAL   | STAUROSPORINE                  |                      | NCI                                                               |
| ITGAL   | ITGAL   | MYCOPHENOLATE MOFETIL          |                      | NCI                                                               |
| ITGAL   | ITGAL   | SIROLIMUS                      |                      | NCI                                                               |
| CBLC    | CBLC    | OLAPARIB                       |                      | JAX-CKB                                                           |
| CYP4F2  | CYP4F2  | CLOFIBRATE                     |                      | PharmGKB                                                          |
| CYP4F2  | CYP4F2  | KETOCONAZOLE                   |                      | PharmGKB                                                          |
| CYP4F2  | CYP4F2  | CLOPIDOGREL                    |                      | PharmGKB                                                          |
| CYP4F2  | CYP4F2  | PHENPROCOUNOMON                |                      | PharmGKB                                                          |
| CYP4F2  | CYP4F2  | ACENOCOUNAROL                  |                      | PharmGKB                                                          |
| CYP4F2  | CYP4F2  | LOVASTATIN                     |                      | PharmGKB                                                          |
| CYP4F2  | CYP4F2  | ASPIRIN                        |                      | PharmGKB                                                          |
| CYP4F2  | CYP4F2  | PAFURAMIDINE MALEATE           |                      | PharmGKB                                                          |
| ADH1B   | ADH1B   | ACETALDEHYDE                   |                      | PharmGKB                                                          |
| ADH1B   | ADH1B   | FOMEPIZOLE                     | inhibitor            | TdgClinicalTrial ChembllInteractions TEND                         |
| ADH1B   | ADH1B   | ALCOHOL                        |                      | PharmGKB                                                          |
| ADH1B   | ADH1B   | ABACAVIR                       |                      | PharmGKB                                                          |
| NR3C2   | NR3C2   | PROGESTERONE                   | agonist antagonist   | TdgClinicalTrial GuideToPharmacology                              |
| NR3C2   | NR3C2   | DESOXYCORTICOSTERONE PIVALATE  | agonist              | ChembllInteractions                                               |



|        |        |                                   |            |                                                                  |
|--------|--------|-----------------------------------|------------|------------------------------------------------------------------|
| NR3C2  | NR3C2  | FELODIPINE                        | antagonist | ChemblInteractions                                               |
| NR3C2  | NR3C2  | FINERENONE                        | antagonist | ChemblInteractions GuideToPharmacology TTD                       |
| NR3C2  | NR3C2  | ONAPRISTONE                       | antagonist | GuideToPharmacology                                              |
| NR3C2  | NR3C2  | FLUDROCORTISONE                   | agonist    | TdgClinicalTrial TEND GuideToPharmacology TTD                    |
| NR3C2  | NR3C2  | XL550                             | antagonist | ChemblInteractions TTD                                           |
| NR3C2  | NR3C2  | HYDROCORTISONE                    | agonist    | GuideToPharmacology                                              |
| NR3C2  | NR3C2  | BREMELANOTIDE                     |            | TTD                                                              |
| NR3C2  | NR3C2  | FLUDROCORTISONE ACETATE           | agonist    | ChemblInteractions                                               |
| NR3C2  | NR3C2  | DROSPIRENONE                      | antagonist | TdgClinicalTrial ChemblInteractions GuideToPharmacology TTD      |
| NR3C2  | NR3C2  | EPLERENONE                        | antagonist | TdgClinicalTrial ChemblInteractions TEND GuideToPharmacology TTD |
| NR3C2  | NR3C2  | PF-03882845                       | antagonist | ChemblInteractions GuideToPharmacology                           |
| NR3C2  | NR3C2  | SPIRONOLACTONE                    | antagonist | TdgClinicalTrial ChemblInteractions TEND GuideToPharmacology TTD |
| NR3C2  | NR3C2  | PREDNISOLONE                      | agonist    | GuideToPharmacology                                              |
| NR3C2  | NR3C2  | NIMODIPINE                        | antagonist | ChemblInteractions GuideToPharmacology                           |
| NR3C2  | NR3C2  | LY2623091                         | antagonist | ChemblInteractions TTD                                           |
| NR3C2  | NR3C2  | ENALAPRIL                         |            | PharmGKB                                                         |
| NR3C2  | NR3C2  | ALDOSTERONE                       | agonist    | GuideToPharmacology TTD                                          |
| NR3C2  | NR3C2  | MT-3995                           | antagonist | ChemblInteractions TTD                                           |
| NR3C2  | NR3C2  | DEXAMETHASONE                     | agonist    | GuideToPharmacology                                              |
| NR3C2  | NR3C2  | DESOXYCORTICOSTERONE ACETATE      | agonist    | ChemblInteractions                                               |
| NR3C2  | NR3C2  | BUDESONIDE                        | agonist    | GuideToPharmacology                                              |
| NCF4   | NCF4   | DOXORUBICIN                       |            | PharmGKB                                                         |
| NCF4   | NCF4   | IDARUBICIN                        |            | PharmGKB                                                         |
| NTNG1  | NTNG1  | ALLOPURINOL                       |            | PharmGKB                                                         |
| FABP1  | FABP1  | FENOFIBRATE                       |            | PharmGKB                                                         |
| FABP1  | FABP1  | DEXAMETHASONE                     |            | NCI                                                              |
| FABP1  | FABP1  | CLOFIBRATE                        |            | NCI                                                              |
| LOXL2  | LOXL2  | SIMTUZUMAB                        | inhibitor  | ChemblInteractions GuideToPharmacology TTD                       |
| DPEP1  | DPEP1  | CILASTATIN                        | inhibitor  | TdgClinicalTrial TEND TTD                                        |
| DPEP1  | DPEP1  | CILASTATIN SODIUM                 | inhibitor  | ChemblInteractions                                               |
| DPEP1  | DPEP1  | DEXAMETHASONE                     |            | NCI                                                              |
| VWF    | VWF    | EGAPTIVON PEGOL                   |            | TdgClinicalTrial                                                 |
| VWF    | VWF    | MITOMYCIN                         |            | NCI                                                              |
| VWF    | VWF    | THALIDOMIDE                       |            | NCI                                                              |
| VWF    | VWF    | HEPARIN                           |            | NCI                                                              |
| VWF    | VWF    | O-CHLOROACETYLCARBAMOYLFUMAGILLOL |            | NCI                                                              |
| VWF    | VWF    | VINCRISTINE                       |            | NCI                                                              |
| VWF    | VWF    | ACETYLCYSTEINE                    |            | NCI                                                              |
| VWF    | VWF    | PENTOXIFYLLINE                    |            | NCI                                                              |
| VWF    | VWF    | CAPLACIZUMAB                      | inhibitor  | TdgClinicalTrial ChemblInteractions TTD                          |
| VWF    | VWF    | PHENYLEPHRINE                     |            | NCI                                                              |
| VWF    | VWF    | STREPTOZOCIN                      |            | NCI                                                              |
| VWF    | VWF    | WARFARIN                          |            | NCI                                                              |
| VWF    | VWF    | PREDNISONE                        |            | NCI                                                              |
| VWF    | VWF    | RIBAVIRIN                         |            | NCI                                                              |
| GLDC   | GLDC   | ESCITALOPRAM                      |            | PharmGKB                                                         |
| GLDC   | GLDC   | CITALOPRAM                        |            | PharmGKB                                                         |
| POU5F1 | POU5F1 | PHENYTOIN                         |            | PharmGKB                                                         |
| POU5F1 | POU5F1 | ALCOHOL                           |            | NCI                                                              |
| POU5F1 | POU5F1 | ALLOPURINOL                       |            | PharmGKB                                                         |
| POU5F1 | POU5F1 | CARBAMAZEPINE                     |            | PharmGKB                                                         |
| CASP1  | CASP1  | BELNACASAN                        |            | TdgClinicalTrial TTD                                             |
| CASP1  | CASP1  | NIVOCASAN                         | inhibitor  | ChemblInteractions TTD                                           |
| CASP1  | CASP1  | BERKELEYDIONE                     |            | DTC                                                              |
| CASP1  | CASP1  | PRALNACASAN                       | inhibitor  | GuideToPharmacology TTD                                          |
| CASP1  | CASP1  | DIACEREIN                         |            | TTD                                                              |
| CASP1  | CASP1  | VERMISTATIN                       |            | DTC                                                              |
| CASP1  | CASP1  | BERKELEYACETAL C                  |            | DTC                                                              |
| CASP1  | CASP1  | CHEMBL415893                      |            | DTC                                                              |
| CASP1  | CASP1  | 4-CHLOROMERCURIBENZOIC ACID       |            | DTC                                                              |
| CASP1  | CASP1  | BERKELEYTRIONE                    |            | DTC                                                              |

|          |          |                             |                      |                                                                  |
|----------|----------|-----------------------------|----------------------|------------------------------------------------------------------|
| CASP1    | CASP1    | ISOBOLDINE                  |                      | DTC                                                              |
| CASP1    | CASP1    | JUGLONE                     |                      | DTC                                                              |
| CASP1    | CASP1    | CHEMBL429095                |                      | DTC                                                              |
| CASP1    | CASP1    | MESALAMINE                  |                      | DTC                                                              |
| CASP1    | CASP1    | EMRICASAN                   | inhibitor            | ChemblInteractions                                               |
| CASP1    | CASP1    | BERKELEYAMIDE C             |                      | DTC                                                              |
| CASP1    | CASP1    | AMMONIUM TRICHLOROTELLURATE | inhibitor            | GuideToPharmacology                                              |
| CASP1    | CASP1    | CHEMBL580421                |                      | DTC                                                              |
| CASP1    | CASP1    | GOSSYPOL                    |                      | DTC                                                              |
| CASP1    | CASP1    | BERKELEYAMIDE B             |                      | DTC                                                              |
| CASP1    | CASP1    | CHEMBL337173                |                      | DTC                                                              |
| CASP1    | CASP1    | BERKELEYACETAL B            |                      | DTC                                                              |
| CASP1    | CASP1    | BERKELEYACETAL A            |                      | DTC                                                              |
| CASP1    | CASP1    | CHEMBL578512                |                      | DTC                                                              |
| PADI2    | PADI2    | CHEMBL1910970               |                      | DTC                                                              |
| PADI2    | PADI2    | STREPTONIGRIN               |                      | DTC                                                              |
| PADI2    | PADI2    | CHEMBL1910971               |                      | DTC                                                              |
| CSPG4    | CSPG4    | ALTEPLASE                   |                      | NCI                                                              |
| TRIB3    | TRIB3    | METHYLPHENIDATE             |                      | PharmGKB                                                         |
| GJC1     | GJC1     | CARBENOXOLONE               | inhibitor            | GuideToPharmacology                                              |
| GJC1     | GJC1     | OCTANOL                     | inhibitor            | GuideToPharmacology                                              |
| DNASE1L3 | DNASE1L3 | IMG-7289                    |                      | TTD                                                              |
| SLC29A2  | SLC29A2  | GEMCITABINE                 |                      | PharmGKB                                                         |
| SLC29A2  | SLC29A2  | TECADENOSON                 |                      | DTC                                                              |
| SLC29A2  | SLC29A2  | MERCAPTOPURINE              |                      | NCI                                                              |
| CD86     | CD86     | PAMIDRONIC ACID             |                      | NCI                                                              |
| CD86     | CD86     | ABATACEPT                   | antagonist inhibitor | TdgClinicalTrial ChemblInteractions TEND GuideToPharmacology TTD |
| CD86     | CD86     | INDOMETHACIN                |                      | NCI                                                              |
| CD86     | CD86     | BELATACEPT                  | antagonist inhibitor | TdgClinicalTrial ChemblInteractions GuideToPharmacology          |
| CD86     | CD86     | TERFENADINE                 |                      | NCI                                                              |
| CD86     | CD86     | ROXITHROMYCIN               |                      | NCI                                                              |
| CD86     | CD86     | DEXAMETHASONE               |                      | NCI                                                              |
| ITGA5    | ITGA5    | VOLOCIXIMAB                 | antibody antagonist  | TALC ChemblInteractions GuideToPharmacology                      |
| ITGA5    | ITGA5    | PF-04605412                 | antibody             | TALC                                                             |
| ITGA5    | ITGA5    | GLPG-0187                   |                      | TdgClinicalTrial                                                 |
| ITGA5    | ITGA5    | ETARACIZUMAB                | antibody             | TALC                                                             |
| ITGA5    | ITGA5    | CILMOSTIM                   |                      | NCI                                                              |
| ITGA5    | ITGA5    | DIMETHYL SULFOXIDE          |                      | NCI                                                              |
| ITGA5    | ITGA5    | CILENGITIDE                 |                      | TdgClinicalTrial                                                 |
| CALCA    | CALCA    | MINOXIDIL                   |                      | TTD                                                              |
| CALCA    | CALCA    | DALFAMPRIDINE               |                      | TTD                                                              |
| CALCA    | CALCA    | PINACIDIL                   |                      | TTD                                                              |
| CALCA    | CALCA    | AZD7009                     |                      | TTD                                                              |
| CALCA    | CALCA    | DOFETILIDE                  |                      | TTD                                                              |
| CALCA    | CALCA    | CHEMBL1563246               |                      | TTD                                                              |
| CALCA    | CALCA    | BIMAKALIM                   |                      | TTD                                                              |
| CALCA    | CALCA    | IBUTILIDE                   |                      | TTD                                                              |
| CALCA    | CALCA    | NATEGLINIDE                 |                      | TTD                                                              |
| CALCA    | CALCA    | DIAZOXIDE                   |                      | TTD                                                              |
| CALCA    | CALCA    | EPTINEZUMAB                 | antibody inhibitor   | ChemblInteractions                                               |
| CALCA    | CALCA    | AMIODARONE                  |                      | TTD                                                              |
| CALCA    | CALCA    | BUDIODARONE                 |                      | TTD                                                              |
| CALCA    | CALCA    | CHEMBL42661                 |                      | TTD                                                              |
| CALCA    | CALCA    | RANITIDINE                  |                      | NCI                                                              |
| CALCA    | CALCA    | ANDOLAST                    |                      | TTD                                                              |
| CALCA    | CALCA    | PREDNISONE                  |                      | NCI                                                              |
| CALCA    | CALCA    | AMIFAMPRIDINE               |                      | TTD                                                              |
| CALCA    | CALCA    | AZIMILIDE                   |                      | TTD                                                              |
| CALCA    | CALCA    | DRONEDARONE                 |                      | TTD                                                              |
| CALCA    | CALCA    | CIZOLIRTINE                 |                      | TTD                                                              |
| CD84     | CD84     | ETANERCEPT                  |                      | PharmGKB                                                         |

|          |          |                           |                              |                                                                  |
|----------|----------|---------------------------|------------------------------|------------------------------------------------------------------|
| DEPTOR   | DEPTOR   | OSI-027                   | inhibitor                    | MyCancerGenome                                                   |
| DEPTOR   | DEPTOR   | AZD-8055                  | inhibitor                    | MyCancerGenome                                                   |
| DEPTOR   | DEPTOR   | SAPANISERTIB              | inhibitor                    | MyCancerGenome                                                   |
| CD3D     | CD3D     | FORALUMAB                 | inhibitor                    | TdgClinicalTrial ChembllInteractions                             |
| CD3D     | CD3D     | MUROMONAB-CD3             | inhibitor                    | TdgClinicalTrial ChembllInteractions                             |
| CD3D     | CD3D     | BLINATUMOMAB              | activator                    | TdgClinicalTrial ChembllInteractions                             |
| CD3D     | CD3D     | CATUMAXOMAB               |                              | TdgClinicalTrial                                                 |
| CD3D     | CD3D     | SOLITOMAB                 |                              | TdgClinicalTrial                                                 |
| CD3D     | CD3D     | OTELIXIZUMAB              |                              | TdgClinicalTrial                                                 |
| CD3D     | CD3D     | VISILIZUMAB               |                              | TdgClinicalTrial                                                 |
| PGF      | PGF      | TB-403                    |                              | TdgClinicalTrial TTD                                             |
| PGF      | PGF      | AFLIBERCEPT               | binder inhibitor             | ChembllInteractions TTD                                          |
| PGF      | PGF      | CONBERCEPT                | inhibitor                    | ChembllInteractions                                              |
| PTH1R    | PTH1R    | 9-AMINOCAMPTOTHECIN       |                              | DTC                                                              |
| PTH1R    | PTH1R    | TERIPARATIDE              | binder agonist               | TdgClinicalTrial ChembllInteractions TEND GuideToPharmacology    |
| PTH1R    | PTH1R    | DEXAMETHASONE             |                              | NCI                                                              |
| PTH1R    | PTH1R    | CHEMBL586870              |                              | DTC                                                              |
| PTH1R    | PTH1R    | CHEMBL599896              |                              | DTC                                                              |
| PTH1R    | PTH1R    | PARATHYROID HORMONE       | agonist                      | TdgClinicalTrial ChembllInteractions                             |
| PTH1R    | PTH1R    | TERIPARATIDE ACETATE      | agonist                      | ChembllInteractions                                              |
| PTH1R    | PTH1R    | PCO-371                   |                              | TTD                                                              |
| PTH1R    | PTH1R    | ABALOPARATIDE             | ligand agonist               | GuideToPharmacology TTD                                          |
| TNFSF13B | TNFSF13B | BLISIBIMOD                | inhibitor                    | TdgClinicalTrial ChembllInteractions TTD                         |
| TNFSF13B | TNFSF13B | TABALUMAB                 | inhibitor                    | ChembllInteractions TTD                                          |
| TNFSF13B | TNFSF13B | BELIMUMAB                 | antibody inhibitor modulator | MyCancerGenome TdgClinicalTrial ChembllInteractions PharmGKB TTD |
| TNFSF13B | TNFSF13B | ATACICEPT                 | inhibitor                    | TdgClinicalTrial ChembllInteractions                             |
| TNFSF13B | TNFSF13B | ETOPOSIDE                 |                              | NCI                                                              |
| PYGL     | PYGL     | DEXAMETHASONE             |                              | PharmGKB                                                         |
| PYGL     | PYGL     | METHOTREXATE              |                              | PharmGKB                                                         |
| PYGL     | PYGL     | ASPARAGINASE              |                              | PharmGKB                                                         |
| CYP2J2   | CYP2J2   | TERFENADINE               | inhibitor                    | GuideToPharmacology PharmGKB                                     |
| CYP2J2   | CYP2J2   | NABUMETONE                |                              | PharmGKB                                                         |
| CYP2J2   | CYP2J2   | THIORIDAZINE              |                              | PharmGKB                                                         |
| CYP2J2   | CYP2J2   | DICLOFENAC                |                              | PharmGKB                                                         |
| CYP2J2   | CYP2J2   | ASTEMIZOLE                |                              | PharmGKB                                                         |
| CYP2J2   | CYP2J2   | ALBENDAZOLE               |                              | PharmGKB                                                         |
| CYP2J2   | CYP2J2   | DANAZOL                   |                              | PharmGKB                                                         |
| CYP2J2   | CYP2J2   | MESORIDAZINE              |                              | PharmGKB                                                         |
| CYP2J2   | CYP2J2   | TACROLIMUS                |                              | PharmGKB                                                         |
| CYP2J2   | CYP2J2   | AMIODARONE                |                              | PharmGKB                                                         |
| SLC14A2  | SLC14A2  | NIFEDIPINE                |                              | PharmGKB                                                         |
| RAPGEF3  | RAPGEF3  | CRYPTOTANSHINONE          |                              | DTC                                                              |
| RAPGEF3  | RAPGEF3  | CHEMBL1256796             |                              | DTC                                                              |
| RAPGEF3  | RAPGEF3  | HEXACHLOROPHENE           |                              | DTC                                                              |
| RAPGEF3  | RAPGEF3  | LUTEOLIN                  |                              | DTC                                                              |
| RAPGEF3  | RAPGEF3  | CHEMBL1210769             |                              | DTC                                                              |
| RAPGEF3  | RAPGEF3  | IDARUBICIN HYDROCHLORIDE  |                              | DTC                                                              |
| RAPGEF3  | RAPGEF3  | CHEMBL234338              |                              | DTC                                                              |
| RAPGEF3  | RAPGEF3  | 2,4-DIHYDROXYBENZOPHENONE |                              | DTC                                                              |
| RAPGEF3  | RAPGEF3  | 9,10-PHENANTHRENEQUINONE  |                              | DTC                                                              |
| RAPGEF3  | RAPGEF3  | RAFOXANIDE                |                              | DTC                                                              |
| RAPGEF3  | RAPGEF3  | TANSHINONE I              |                              | DTC                                                              |
| RAPGEF3  | RAPGEF3  | BITHIONOLOXIDE            |                              | DTC                                                              |
| RAPGEF3  | RAPGEF3  | DAPHNORETIN               |                              | DTC                                                              |
| RAPGEF3  | RAPGEF3  | ACRIFLAVINE               |                              | DTC                                                              |
| RAPGEF3  | RAPGEF3  | CHEMBL601757              |                              | DTC                                                              |
| RAPGEF3  | RAPGEF3  | PENTABROMOPHENOL          |                              | DTC                                                              |
| RAPGEF3  | RAPGEF3  | SENNOSIDE B               |                              | DTC                                                              |
| RAPGEF3  | RAPGEF3  | CHEMBL1576310             |                              | DTC                                                              |
| RAPGEF3  | RAPGEF3  | PHYSODIC ACID             |                              | DTC                                                              |
| RAPGEF3  | RAPGEF3  | CHEMBL585591              |                              | DTC                                                              |

|          |          |                                      |            |                                                                  |
|----------|----------|--------------------------------------|------------|------------------------------------------------------------------|
| RAPGEF3  | RAPGEF3  | PYROGALLOL RED                       |            | DTC                                                              |
| RAPGEF3  | RAPGEF3  | LOBARIC ACID                         |            | DTC                                                              |
| RAPGEF3  | RAPGEF3  | GYROPHORIC ACID                      |            | DTC                                                              |
| RAPGEF3  | RAPGEF3  | ACID BLUE 129                        |            | DTC                                                              |
| RAPGEF3  | RAPGEF3  | CHEMBL515252                         |            | DTC                                                              |
| RAPGEF3  | RAPGEF3  | CHEMBL601385                         |            | DTC                                                              |
| RAPGEF3  | RAPGEF3  | CHEMBL505670                         |            | DTC                                                              |
| RAPGEF3  | RAPGEF3  | PURPUROGALLIN                        |            | DTC                                                              |
| RAPGEF3  | RAPGEF3  | 1,4-DIMETHOXYANTHRAQUINONE           |            | DTC                                                              |
| RAPGEF3  | RAPGEF3  | DIPYRIDAMOLE                         |            | DTC                                                              |
| RAPGEF3  | RAPGEF3  | CHEMBL1306556                        |            | DTC                                                              |
| RAPGEF3  | RAPGEF3  | MYRICETIN                            |            | DTC                                                              |
| RAPGEF3  | RAPGEF3  | ESTROIPATE                           |            | DTC                                                              |
| ADA      | ADA      | PENTOSTATIN                          | inhibitor  | TdgClinicalTrial ChemblInteractions TEND GuideToPharmacology TTD |
| ADA      | ADA      | DIPYRIDAMOLE                         | inhibitor  | TdgClinicalTrial TEND                                            |
| ADA      | ADA      | FLUDARABINE                          |            | TTD                                                              |
| ADA      | ADA      | HYDROCORTISONE                       |            | NCI                                                              |
| ADA      | ADA      | CLADRIBINE                           |            | TTD                                                              |
| ADA      | ADA      | CORDYCEPIN                           |            | DTC                                                              |
| ADA      | ADA      | GARLIC                               |            | NCI                                                              |
| ADA      | ADA      | ELAPEGADEMASE                        |            | TTD                                                              |
| ADA      | ADA      | EHNA                                 | inhibitor  | GuideToPharmacology                                              |
| ADA      | ADA      | METHOTREXATE                         |            | NCI                                                              |
| ADA      | ADA      | AMITRIPTYLINE                        |            | NCI                                                              |
| ADA      | ADA      | LEVODOPA                             |            | NCI                                                              |
| RAC2     | RAC2     | IDARUBICIN                           |            | PharmGKB                                                         |
| RAC2     | RAC2     | DOXORUBICIN                          |            | PharmGKB                                                         |
| ITGB6    | ITGB6    | STX-100                              | inhibitor  | ChemblInteractions                                               |
| ITGB6    | ITGB6    | INTETUMUMAB                          | antagonist | ChemblInteractions                                               |
| ITGB6    | ITGB6    | GLPG-0187                            |            | TdgClinicalTrial                                                 |
| ITGB6    | ITGB6    | ABITUZUMAB                           | inhibitor  | ChemblInteractions                                               |
| FCGR2A   | FCGR2A   | INFLIXIMAB                           |            | PharmGKB                                                         |
| FCGR2A   | FCGR2A   | CETUXIMAB                            |            | PharmGKB                                                         |
| FCGR2A   | FCGR2A   | ADALIMUMAB                           |            | PharmGKB                                                         |
| FCGR2A   | FCGR2A   | RITUXIMAB                            |            | PharmGKB                                                         |
| FCGR2A   | FCGR2A   | VALZIFLOCEPT                         |            | TTD                                                              |
| FCGR2A   | FCGR2A   | ETANERCEPT                           | ligand     | PharmGKB                                                         |
| FCGR2A   | FCGR2A   | TRASTUZUMAB                          |            | PharmGKB                                                         |
| DCN      | DCN      | SIROLIMUS                            |            | NCI                                                              |
| IL10RA   | IL10RA   | INTERLEUKIN-10                       | agonist    | GuideToPharmacology                                              |
| PVALB    | PVALB    | SODIUM CHLORIDE                      |            | NCI                                                              |
| COL4A3   | COL4A3   | COLLAGENASE CLOSTRIDIUM HISTOLYTICUM |            | ChemblInteractions                                               |
| COL4A3   | COL4A3   | OCRIPLASMIN                          |            | ChemblInteractions                                               |
| CCL4     | CCL4     | EPOETIN ALFA                         |            | NCI                                                              |
| CCL4     | CCL4     | CLODRONIC ACID                       |            | NCI                                                              |
| CYP27B1  | CYP27B1  | CHEMBL2036072                        |            | DTC                                                              |
| CYP27B1  | CYP27B1  | RIBAVIRIN                            |            | PharmGKB                                                         |
| CYP27B1  | CYP27B1  | DEFERASIROX                          |            | PharmGKB                                                         |
| CYP27B1  | CYP27B1  | CHEMBL255088                         | inhibitor  | GuideToPharmacology                                              |
| APLN     | APLN     | STAUROSPORINE                        |            | NCI                                                              |
| HLA-DQB1 | HLA-DQB1 | TICLOPIDINE                          |            | PharmGKB                                                         |
| HLA-DQB1 | HLA-DQB1 | CARBAMAZEPINE                        |            | PharmGKB                                                         |
| HLA-DQB1 | HLA-DQB1 | AMOXICILLIN                          |            | PharmGKB                                                         |
| HLA-DQB1 | HLA-DQB1 | FLOXACILLIN                          |            | PharmGKB                                                         |
| HLA-DQB1 | HLA-DQB1 | ACETAMINOPHEN                        |            | PharmGKB                                                         |
| HLA-DQB1 | HLA-DQB1 | CLAVULANIC ACID                      |            | PharmGKB                                                         |
| HLA-DQB1 | HLA-DQB1 | BUCILLAMINE                          |            | PharmGKB                                                         |
| HLA-DQB1 | HLA-DQB1 | FLUPIRTINE                           |            | PharmGKB                                                         |
| HLA-DQB1 | HLA-DQB1 | NEVIRAPINE                           |            | PharmGKB                                                         |
| HLA-DQB1 | HLA-DQB1 | LAMOTRIGINE                          |            | PharmGKB                                                         |
| HLA-DQB1 | HLA-DQB1 | LUMIRACOXIB                          |            | PharmGKB                                                         |

|          |          |                         |                               |                                                                               |
|----------|----------|-------------------------|-------------------------------|-------------------------------------------------------------------------------|
| HLA-DQB1 | HLA-DQB1 | ASPIRIN                 |                               | PharmGKB                                                                      |
| SLAMF7   | SLAMF7   | ELOTUZUMAB              | antibody inhibitor modulator  | MyCancerGenome TdgClinicalTrial ChemblInteractions GuideToPharmacology        |
| CCR5     | CCR5     | MARAVIROC               | antagonist                    | DTC TdgClinicalTrial ChemblInteractions TEND GuideToPharmacology PharmGKB TTD |
| CCR5     | CCR5     | ANCRIVIROC              | antagonist                    | GuideToPharmacology                                                           |
| CCR5     | CCR5     | LERONLIMAB              | antibody antagonist           | ChemblInteractions GuideToPharmacology TTD                                    |
| CCR5     | CCR5     | CHEMBL207004            | antagonist                    | DTC GuideToPharmacology TTD                                                   |
| CCR5     | CCR5     | INCB-9471               | antagonist                    | ChemblInteractions TTD                                                        |
| CCR5     | CCR5     | CENICRIVIROC            | antagonist                    | TdgClinicalTrial ChemblInteractions GuideToPharmacology TTD                   |
| CCR5     | CCR5     | APLAVIROC HYDROCHLORIDE | antagonist                    | ChemblInteractions                                                            |
| CCR5     | CCR5     | CHEMBL41275             | antagonist                    | GuideToPharmacology                                                           |
| CCR5     | CCR5     | VICRIVIROC MALEATE      | antagonist                    | ChemblInteractions                                                            |
| CCR5     | CCR5     | PF-04634817             | antagonist                    | ChemblInteractions                                                            |
| CCR5     | CCR5     | VICRIVIROC              | antagonist                    | TdgClinicalTrial GuideToPharmacology TTD                                      |
| CCR5     | CCR5     | AZD5672                 | antagonist                    | ChemblInteractions GuideToPharmacology                                        |
| CCR5     | CCR5     | CHEMBL2018969           | antagonist                    | GuideToPharmacology                                                           |
| CCR5     | CCR5     | PF-232798               |                               | TTD                                                                           |
| CCR5     | CCR5     | APLAVIROC               | antagonist                    | GuideToPharmacology                                                           |
| CD4      | CD4      | PRILIXIMAB              | negative modulator            | ChemblInteractions                                                            |
| CD4      | CD4      | CLENOLIXIMAB            | inhibitor                     | ChemblInteractions                                                            |
| CD4      | CD4      | TRX-1                   | inhibitor                     | ChemblInteractions                                                            |
| CD4      | CD4      | ZANOLIMUMAB             |                               | TdgClinicalTrial ChemblInteractions TTD                                       |
| CD4      | CD4      | CEDELIZUMAB             | inhibitor                     | ChemblInteractions                                                            |
| CD4      | CD4      | IBALIZUMAB              | antagonist inhibitor antibody | ChemblInteractions GuideToPharmacology TTD                                    |
| CD4      | CD4      | KELIXIMAB               | negative modulator            | ChemblInteractions                                                            |
| CD4      | CD4      | TREGALIZUMAB            | agonist antibody              | TdgClinicalTrial ChemblInteractions GuideToPharmacology TTD                   |
| CD4      | CD4      | HERBIMYCIN              |                               | NCI                                                                           |
| HLA-DPB1 | HLA-DPB1 | CLOZAPINE               |                               | PharmGKB                                                                      |
| HLA-DPB1 | HLA-DPB1 | ASPIRIN                 |                               | PharmGKB                                                                      |
| ABCC3    | ABCC3    | EMTRICITABINE           |                               | DTC                                                                           |
| ABCC3    | ABCC3    | PACLITAXEL              |                               | CIViC                                                                         |
| ABCC3    | ABCC3    | METHOTREXATE            |                               | PharmGKB                                                                      |
| ABCC3    | ABCC3    | CEFOPERAZONE            |                               | DTC                                                                           |
| ABCC3    | ABCC3    | DOXORUBICIN             |                               | DTC PharmGKB                                                                  |
| ABCC3    | ABCC3    | CEFACLOR                |                               | DTC                                                                           |
| ABCC3    | ABCC3    | ABACAVIR                |                               | DTC                                                                           |
| ABCC3    | ABCC3    | DELAVIRDINE             |                               | DTC                                                                           |
| ABCC3    | ABCC3    | TENOFOVIR               |                               | DTC                                                                           |
| ABCC3    | ABCC3    | CISPLATIN               |                               | PharmGKB                                                                      |
| ABCC3    | ABCC3    | LAMIVUDINE              |                               | DTC PharmGKB                                                                  |
| ABCC3    | ABCC3    | VINCISTINE              |                               | PharmGKB                                                                      |
| ABCC3    | ABCC3    | CEPHALEXIN              |                               | DTC                                                                           |
| ABCC3    | ABCC3    | CEFUROXIME              |                               | DTC                                                                           |
| ABCC3    | ABCC3    | MORPHINE                |                               | PharmGKB                                                                      |
| ABCC3    | ABCC3    | CEPHRADINE              |                               | DTC                                                                           |
| ABCC3    | ABCC3    | CYCLOPHOSPHAMIDE        |                               | PharmGKB                                                                      |
| ABCC3    | ABCC3    | CEFOXITIN               |                               | DTC                                                                           |
| ABCC3    | ABCC3    | RIMONABANT              |                               | DTC                                                                           |
| ABCC3    | ABCC3    | CEFMETAZOLE             |                               | DTC                                                                           |
| ABCC3    | ABCC3    | CEFTRIAZONE             |                               | DTC                                                                           |
| ABCC3    | ABCC3    | ETRAVIRINE              |                               | DTC                                                                           |
| ABCC3    | ABCC3    | NEVIRAPINE              |                               | DTC                                                                           |
| ABCC3    | ABCC3    | EFVIRENZA               |                               | DTC                                                                           |
| ABCC3    | ABCC3    | CEFAMANDOLE             |                               | DTC                                                                           |
| PDK1     | PDK1     | CELECOXIB               |                               | PharmGKB                                                                      |
| PDK1     | PDK1     | CHEMBL445304            |                               | DTC                                                                           |
| PDK1     | PDK1     | AR-12                   | inhibitor                     | TdgClinicalTrial ChemblInteractions                                           |
| PDK1     | PDK1     | DICHLOROACETIC ACID     | inhibitor                     | DTC                                                                           |
| PDK1     | PDK1     | UCN-01                  | inhibitor                     | ChemblInteractions                                                            |
| PDK1     | PDK1     | CHEMBL257158            |                               | DTC                                                                           |
| AQP3     | AQP3     | AUPHEN                  | inhibitor                     | GuideToPharmacology                                                           |
| BTC      | BTC      | PANITUMUMAB             |                               | PharmGKB                                                                      |

|       |       |                            |                           |                                                                              |
|-------|-------|----------------------------|---------------------------|------------------------------------------------------------------------------|
| BTC   | BTC   | CETUXIMAB                  |                           | PharmGKB                                                                     |
| CD3E  | CD3E  | ERTUMAXOMAB                |                           | ChemblInteractions TTD                                                       |
| CD3E  | CD3E  | OTELIXIZUMAB               | antibody                  | TdgClinicalTrial ChemblInteractions GuideToPharmacology                      |
| CD3E  | CD3E  | BLINATUMOMAB               | antibody                  | TdgClinicalTrial ChemblInteractions GuideToPharmacology                      |
| CD3E  | CD3E  | MUROMONAB-CD3              | antibody inhibitor binder | TdgClinicalTrial ChemblInteractions TEND GuideToPharmacology TTD             |
| CD3E  | CD3E  | TEPLIZUMAB                 |                           | TdgClinicalTrial ChemblInteractions                                          |
| CD3E  | CD3E  | CATUMAXOMAB                | agonist antibody          | TdgClinicalTrial GuideToPharmacology                                         |
| CD3E  | CD3E  | FORALUMAB                  | inhibitor                 | TdgClinicalTrial ChemblInteractions                                          |
| CD3E  | CD3E  | SOLITOMAB                  |                           | TdgClinicalTrial                                                             |
| CD3E  | CD3E  | VISILIZUMAB                | inhibitor                 | TdgClinicalTrial ChemblInteractions                                          |
| CD3E  | CD3E  | RESIMMUNE                  |                           | TTD                                                                          |
| CDH3  | CDH3  | PF-06671008                |                           | TTD                                                                          |
| RRM2  | RRM2  | HYDROXYUREA                | inhibitor                 | ChemblInteractions GuideToPharmacology TTD                                   |
| RRM2  | RRM2  | FLUDARABINE PHOSPHATE      | inhibitor                 | ChemblInteractions                                                           |
| RRM2  | RRM2  | CYTARABINE                 |                           | PharmGKB                                                                     |
| RRM2  | RRM2  | GALLIUM NITRATE            | inhibitor                 | ChemblInteractions                                                           |
| RRM2  | RRM2  | GEMCITABINE                | inhibitor                 | ClarityFoundationClinicalTrial GuideToPharmacology TTD                       |
| RRM2  | RRM2  | FLUDARABINE                | inhibitor                 | GuideToPharmacology                                                          |
| RRM2  | RRM2  | LY-2334737                 |                           | TTD                                                                          |
| RRM2  | RRM2  | CLOFARABINE                | inhibitor                 | ChemblInteractions GuideToPharmacology                                       |
| RRM2  | RRM2  | TRIAPINE                   |                           | TdgClinicalTrial TTD                                                         |
| RRM2  | RRM2  | GEMCITABINE HYDROCHLORIDE  | inhibitor                 | ChemblInteractions                                                           |
| RRM2  | RRM2  | TEZACITABINE               | inhibitor                 | ChemblInteractions                                                           |
| RRM2  | RRM2  | CLADRIBINE                 | inhibitor                 | PharmGKB                                                                     |
| RRM2  | RRM2  | GEMCITABINE ELAIDATE       |                           | TTD                                                                          |
| TOP2A | TOP2A | AMRUBICIN                  | inhibitor                 | ChemblInteractions                                                           |
| TOP2A | TOP2A | EPIRUBICIN                 | inhibitor                 | TdgClinicalTrial TEND PharmGKB                                               |
| TOP2A | TOP2A | CHEMBL1773343              |                           | DTC                                                                          |
| TOP2A | TOP2A | DOXORUBICIN                | inhibitor                 | DTC TdgClinicalTrial ClarityFoundationClinicalTrial TEND GuideToPharmacology |
| TOP2A | TOP2A | BECATECARIN                | inhibitor                 | TdgClinicalTrial ChemblInteractions                                          |
| TOP2A | TOP2A | VOSAROXIN                  | inhibitor                 | TdgClinicalTrial ChemblInteractions                                          |
| TOP2A | TOP2A | ELLIPTECINE                |                           | DTC                                                                          |
| TOP2A | TOP2A | TENIPOSIDE                 | inhibitor                 | TdgClinicalTrial ChemblInteractions NCI TEND                                 |
| TOP2A | TOP2A | MAKALUVAMINE C TFA SALT    |                           | DTC                                                                          |
| TOP2A | TOP2A | DAUNORUBICIN               | inhibitor                 | DTC TdgClinicalTrial NCI                                                     |
| TOP2A | TOP2A | ADRIAMYCIN                 |                           | NCI                                                                          |
| TOP2A | TOP2A | C-1311                     | inhibitor                 | TdgClinicalTrial ChemblInteractions                                          |
| TOP2A | TOP2A | CARINATIN G                |                           | DTC                                                                          |
| TOP2A | TOP2A | 4'-O-ACETYLPATENTIFLORIN B |                           | DTC                                                                          |
| TOP2A | TOP2A | MITOXANTRONE               | inhibitor                 | TdgClinicalTrial NCI TEND GuideToPharmacology                                |
| TOP2A | TOP2A | DEXRAZOXANE                | inhibitor                 | NCI                                                                          |
| TOP2A | TOP2A | DAUNORUBICIN CITRATE       | inhibitor                 | ChemblInteractions                                                           |
| TOP2A | TOP2A | ETOPOSIDE                  | inhibitor                 | DTC TdgClinicalTrial ChemblInteractions NCI TEND GuideToPharmacology         |
| TOP2A | TOP2A | BETULIN                    |                           | DTC                                                                          |
| TOP2A | TOP2A | CHEMBL2332127              |                           | DTC                                                                          |
| TOP2A | TOP2A | IDARUBICIN                 | inhibitor                 | TdgClinicalTrial TEND                                                        |
| TOP2A | TOP2A | KAEMPFERITRIN              |                           | DTC                                                                          |
| TOP2A | TOP2A | CHEMBL244268               |                           | DTC                                                                          |
| TOP2A | TOP2A | GANCOTAMAB                 | inhibitor                 | ChemblInteractions                                                           |
| TOP2A | TOP2A | PODOFILOX                  | inhibitor                 | TdgClinicalTrial TEND                                                        |
| TOP2A | TOP2A | CHEMBL2171781              |                           | DTC                                                                          |
| TOP2A | TOP2A | CHEMBL2171794              |                           | DTC                                                                          |
| TOP2A | TOP2A | AMONAFIDE                  |                           | DTC TdgClinicalTrial                                                         |
| TOP2A | TOP2A | AMSACRINE                  | inhibitor                 | DTC NCI                                                                      |
| TOP2A | TOP2A | BERUBICIN HYDROCHLORIDE    | inhibitor                 | ChemblInteractions                                                           |
| TOP2A | TOP2A | CHEMBL1080077              |                           | DTC                                                                          |
| TOP2A | TOP2A | CAMPTOTHECIN               |                           | NCI                                                                          |
| TOP2A | TOP2A | ELINAFIDE                  |                           | DTC                                                                          |
| TOP2A | TOP2A | CHEMBL2332126              |                           | DTC                                                                          |
| TOP2A | TOP2A | VALRUBICIN                 | inhibitor                 | TdgClinicalTrial ChemblInteractions TEND                                     |
| TOP2A | TOP2A | CHEMBL2332128              |                           | DTC                                                                          |

|          |          |                            |           |                                                         |
|----------|----------|----------------------------|-----------|---------------------------------------------------------|
| TOP2A    | TOP2A    | ETOPOSIDE PHOSPHATE        | inhibitor | ChemblInteractions                                      |
| TOP2A    | TOP2A    | CHEMBL2171812              |           | DTC                                                     |
| TOP2A    | TOP2A    | MAKALUVAMINE A             |           | DTC                                                     |
| TOP2A    | TOP2A    | MYRICETIN                  |           | DTC                                                     |
| TOP2A    | TOP2A    | DEMETHYLZEYLASTERONE       |           | DTC                                                     |
| TOP2A    | TOP2A    | CHEMBL594695               |           | DTC                                                     |
| TOP2A    | TOP2A    | IDRONOXIL                  |           | ClarityFoundationClinicalTrial                          |
| TOP2A    | TOP2A    | CHEMBL594379               |           | DTC                                                     |
| TOP2A    | TOP2A    | CHEMBL593570               |           | DTC                                                     |
| TOP2A    | TOP2A    | MAKALUVAMINE F             |           | DTC                                                     |
| TOP2A    | TOP2A    | ALDOXORUBICIN              | inhibitor | TdgClinicalTrial ChemblInteractions                     |
| TOP2A    | TOP2A    | FRANGULIN B                |           | DTC                                                     |
| TOP2A    | TOP2A    | CHEMBL2023733              |           | DTC                                                     |
| TOP2A    | TOP2A    | IDARUBICIN HYDROCHLORIDE   | inhibitor | ChemblInteractions                                      |
| TOP2A    | TOP2A    | MAKALUVAMINE E             |           | DTC                                                     |
| TOP2A    | TOP2A    | CHEMBL594153               |           | DTC                                                     |
| TOP2A    | TOP2A    | PACLITAXEL                 |           | TdgClinicalTrial                                        |
| TOP2A    | TOP2A    | CHEMBL594257               |           | DTC                                                     |
| TOP2A    | TOP2A    | GENISTEIN                  |           | DTC                                                     |
| TOP2A    | TOP2A    | 13-DEOXYDOXORUBICIN        |           | TdgClinicalTrial                                        |
| TOP2A    | TOP2A    | DIPHYLLIN                  |           | DTC                                                     |
| TOP2A    | TOP2A    | FLUOROURACIL               |           | PharmGKB                                                |
| TOP2A    | TOP2A    | LYCOBETAINE                |           | DTC                                                     |
| TOP2A    | TOP2A    | VINCISTINE                 |           | NCI                                                     |
| TOP2A    | TOP2A    | SECAUBRYOLIDE              |           | DTC                                                     |
| TOP2A    | TOP2A    | MITOXANTRONE HYDROCHLORIDE | inhibitor | ChemblInteractions                                      |
| TOP2A    | TOP2A    | TRICITRINOL B              |           | DTC                                                     |
| TOP2A    | TOP2A    | AMRUBICIN HYDROCHLORIDE    | inhibitor | ChemblInteractions                                      |
| TOP2A    | TOP2A    | OLEANDEROLIDE              |           | DTC                                                     |
| TOP2A    | TOP2A    | QUERCETIN                  |           | DTC                                                     |
| TOP2A    | TOP2A    | CHEMBL596082               |           | DTC                                                     |
| TOP2A    | TOP2A    | HURATOXIN                  |           | DTC                                                     |
| TOP2A    | TOP2A    | HYDROQUINONE               |           | NCI                                                     |
| TOP2A    | TOP2A    | SIMOCYCLINONE D8           |           | DTC                                                     |
| TOP2A    | TOP2A    | DIAZIRINE                  |           | DTC                                                     |
| TOP2A    | TOP2A    | LUPEOL                     |           | DTC                                                     |
| TOP2A    | TOP2A    | CHEMBL507986               |           | DTC                                                     |
| TOP2A    | TOP2A    | DOXORUBICIN HYDROCHLORIDE  | inhibitor | ChemblInteractions                                      |
| TOP2A    | TOP2A    | UNGEREMINE                 |           | DTC                                                     |
| TOP2A    | TOP2A    | FISETIN                    |           | DTC                                                     |
| TOP2A    | TOP2A    | DAUNORUBICIN HYDROCHLORIDE | inhibitor | ChemblInteractions                                      |
| TOP2A    | TOP2A    | CHEMBL594259               |           | DTC                                                     |
| TOP2A    | TOP2A    | CHEMBL607534               |           | DTC                                                     |
| TOP2A    | TOP2A    | DIGITOXIN                  |           | DTC                                                     |
| CYP17A1  | CYP17A1  | ORTERONEL                  | inhibitor | TdgClinicalTrial ChemblInteractions CancerCommons TTD   |
| CYP17A1  | CYP17A1  | GALETERONE                 | inhibitor | TdgClinicalTrial ChemblInteractions GuideToPharmacology |
| CYP17A1  | CYP17A1  | ABIRATERONE                | inhibitor | TdgClinicalTrial CGI GuideToPharmacology PharmGKB TTD   |
| CYP17A1  | CYP17A1  | ABIRATERONE ACETATE        | inhibitor | ChemblInteractions                                      |
| CYP17A1  | CYP17A1  | CFG-920                    |           | TTD                                                     |
| CYP17A1  | CYP17A1  | ENZALUTAMIDE               |           | CGI                                                     |
| CYP17A1  | CYP17A1  | SEVITERONEL                |           | TTD                                                     |
| CYP17A1  | CYP17A1  | ZYTIGA                     | inhibitor | CancerCommons                                           |
| BCL2A1   | BCL2A1   | OBATOCLAX MESYLATE         | inhibitor | ChemblInteractions                                      |
| EIF4EBP1 | EIF4EBP1 | PACLITAXEL                 |           | NCI                                                     |
| CD27     | CD27     | VARLILUMAB                 |           | TTD                                                     |
| SGK2     | SGK2     | ILORASERTIB                |           | DTC                                                     |
| SGK2     | SGK2     | CHEMBL225519               |           | DTC                                                     |
| SGK2     | SGK2     | PF-00562271                |           | DTC                                                     |
| SGK2     | SGK2     | RG-1530                    |           | DTC                                                     |
| SGK2     | SGK2     | CENISERTIB                 |           | DTC                                                     |
| SGK2     | SGK2     | SB-220025                  |           | DTC                                                     |

|       |       |                                             |            |                                          |
|-------|-------|---------------------------------------------|------------|------------------------------------------|
| SGK2  | SGK2  | CYC-116                                     |            | DTC                                      |
| SGK2  | SGK2  | SOTRASTAUIN                                 |            | DTC                                      |
| SGK2  | SGK2  | GSK-269962A                                 |            | DTC                                      |
| SGK2  | SGK2  | SP-600125                                   |            | DTC                                      |
| SGK2  | SGK2  | DOVITINIB                                   |            | DTC                                      |
| SGK2  | SGK2  | AZD-1080                                    |            | DTC                                      |
| SGK2  | SGK2  | GW441756X                                   |            | DTC                                      |
| SGK2  | SGK2  | FASUDIL                                     |            | DTC                                      |
| DLL4  | DLL4  | NAVICIXIZUMAB                               |            | TTD                                      |
| DLL4  | DLL4  | DEMCIZUMAB                                  | inhibitor  | TdgClinicalTrial ChembllInteractions TTD |
| DLL4  | DLL4  | ENOTICUMAB                                  |            | TTD                                      |
| ITGAM | ITGAM | DIMETHYL SULFOXIDE                          |            | NCI                                      |
| ITGAM | ITGAM | PHENYLEPHRINE                               |            | NCI                                      |
| ITGAM | ITGAM | LIARAZOLE                                   |            | NCI                                      |
| ITGAM | ITGAM | ROVELIZUMAB                                 | antagonist | ChembllInteractions                      |
| ITGAM | ITGAM | CLARITHROMYCIN                              |            | NCI                                      |
| ITGAM | ITGAM | HYDROCORTISONE                              |            | NCI                                      |
| ITGAM | ITGAM | MORPHINE                                    |            | NCI                                      |
| ITGAM | ITGAM | ATORVASTATIN                                |            | NCI                                      |
| ITGAM | ITGAM | FENTANYL                                    |            | NCI                                      |
| ITGAM | ITGAM | THEOPHYLLINE                                |            | NCI                                      |
| ACKR3 | ACKR3 | PLERIXAFOR                                  | agonist    | GuideToPharmacology                      |
| HPGD  | HPGD  | CHEMBL601618                                |            | DTC                                      |
| HPGD  | HPGD  | CHEMBL592106                                |            | DTC                                      |
| HPGD  | HPGD  | LY-255283                                   |            | DTC                                      |
| HPGD  | HPGD  | 4-CHLOROMERCURIBENZOIC ACID                 |            | DTC                                      |
| HPGD  | HPGD  | HAEMATOKYLIN                                |            | DTC                                      |
| HPGD  | HPGD  | TYRPHOSTIN 47                               |            | DTC                                      |
| HPGD  | HPGD  | ALLITRIDIN                                  |            | DTC                                      |
| HPGD  | HPGD  | CHEMBL472656                                |            | DTC                                      |
| HPGD  | HPGD  | LUTEOLIN                                    |            | DTC                                      |
| HPGD  | HPGD  | REV-5901                                    |            | DTC                                      |
| HPGD  | HPGD  | DICHLOROPHEN                                |            | DTC                                      |
| HPGD  | HPGD  | BRIMONIDINE                                 |            | DTC                                      |
| HPGD  | HPGD  | THIMEROSAL                                  |            | DTC                                      |
| HPGD  | HPGD  | ZARDAVERINE                                 |            | DTC                                      |
| HPGD  | HPGD  | HYPERICIN                                   |            | DTC                                      |
| HPGD  | HPGD  | CHEMBL239439                                |            | DTC                                      |
| HPGD  | HPGD  | MERCURIC CHLORIDE                           |            | DTC                                      |
| HPGD  | HPGD  | CHEMBL220845                                |            | DTC                                      |
| HPGD  | HPGD  | ZAPA                                        |            | DTC                                      |
| HPGD  | HPGD  | OBTUSAQUINONE                               |            | DTC                                      |
| HPGD  | HPGD  | METHYL 7-DESHYDROXYPYROGALLIN-4-CARBOXYLATE |            | DTC                                      |
| HPGD  | HPGD  | CHEMBL1481974                               |            | DTC                                      |
| HPGD  | HPGD  | PHENAMIPHOS                                 |            | DTC                                      |
| HPGD  | HPGD  | CHEMBL581929                                |            | DTC                                      |
| HPGD  | HPGD  | CHEMBL38508                                 |            | DTC                                      |
| HPGD  | HPGD  | ARACHIDONIC ACID                            |            | DTC                                      |
| HPGD  | HPGD  | SAPPANONE A DIMETHYL ETHER                  |            | DTC                                      |
| HPGD  | HPGD  | DEMETHYLENCECALIN                           |            | DTC                                      |
| HPGD  | HPGD  | 7-NITROINDAZOLE                             |            | DTC                                      |
| HPGD  | HPGD  | CHEMBL502257                                |            | DTC                                      |
| HPGD  | HPGD  | FPL-55712                                   |            | DTC                                      |
| HPGD  | HPGD  | TOLMETIN SODIUM                             |            | DTC                                      |
| HPGD  | HPGD  | GOSSYPETIN                                  |            | DTC                                      |
| HPGD  | HPGD  | CHLORANIL                                   |            | DTC                                      |
| HPGD  | HPGD  | CHEMBL592124                                |            | DTC                                      |
| HPGD  | HPGD  | CHEMBL242171                                |            | DTC                                      |
| HPGD  | HPGD  | CHEMBL120806                                |            | DTC                                      |
| HPGD  | HPGD  | GUTHION                                     |            | DTC                                      |
| HPGD  | HPGD  | NIFEDIPINE                                  |            | DTC                                      |



|      |      |                                           |     |
|------|------|-------------------------------------------|-----|
| HPGD | HPGD | CARNOSIC ACID                             | DTC |
| HPGD | HPGD | CHEMBL515505                              | DTC |
| HPGD | HPGD | CISPLATIN                                 | DTC |
| HPGD | HPGD | SULFADIAZINE, SILVER                      | DTC |
| HPGD | HPGD | LEOIDIN                                   | DTC |
| HPGD | HPGD | (S)-THIORPHAN                             | DTC |
| HPGD | HPGD | OXYBENZONE                                | DTC |
| HPGD | HPGD | MANGOSTIN                                 | DTC |
| HPGD | HPGD | THIOTEPA                                  | DTC |
| HPGD | HPGD | TANSHINONE IIA                            | DTC |
| HPGD | HPGD | PURPUROGALLIN                             | DTC |
| HPGD | HPGD | CHEMBL602807                              | DTC |
| HPGD | HPGD | QUINALIZARIN                              | DTC |
| HPGD | HPGD | BAY-11-7085                               | DTC |
| HPGD | HPGD | CHEMBL277148                              | DTC |
| HPGD | HPGD | HEXACHLOROPHENE                           | DTC |
| HPGD | HPGD | SULFASALAZINE                             | DTC |
| HPGD | HPGD | 2',4'-DIHYDROXYCHALCONE                   | DTC |
| HPGD | HPGD | LECANORIC ACID                            | DTC |
| HPGD | HPGD | NBQX                                      | DTC |
| HPGD | HPGD | CHEMBL523200                              | DTC |
| HPGD | HPGD | IRIGINOL HEXAACEATATE                     | DTC |
| HPGD | HPGD | ELLAGIC ACID                              | DTC |
| HPGD | HPGD | DIOXYBENZONE                              | DTC |
| HPGD | HPGD | APIGENIN                                  | DTC |
| HPGD | HPGD | 2-ARACHIDONOYLGLYCEROL                    | DTC |
| HPGD | HPGD | CHEMBL598663                              | DTC |
| HPGD | HPGD | LIOTHYRONINE SODIUM                       | DTC |
| HPGD | HPGD | BERGAPTOL                                 | DTC |
| HPGD | HPGD | SOFALCONE                                 | DTC |
| HPGD | HPGD | HOMIDIUM BROMIDE                          | DTC |
| HPGD | HPGD | TYRPHOSTIN 23                             | DTC |
| HPGD | HPGD | PROSTAGLANDIN A2                          | DTC |
| HPGD | HPGD | CARMINE                                   | DTC |
| HPGD | HPGD | IODOPHTHALEIN                             | DTC |
| HPGD | HPGD | CURCUMIN                                  | DTC |
| HPGD | HPGD | ATHRAQUINONES A                           | DTC |
| HPGD | HPGD | PURPURIN                                  | DTC |
| HPGD | HPGD | CHEMBL73711                               | DTC |
| HPGD | HPGD | THIOGUANINE                               | DTC |
| HPGD | HPGD | DIETHYLTOLUAMIDE                          | DTC |
| HPGD | HPGD | CHEMBL531709                              | DTC |
| HPGD | HPGD | CHEMBL471005                              | DTC |
| HPGD | HPGD | CHEMBL244707                              | DTC |
| HPGD | HPGD | AURIN                                     | DTC |
| HPGD | HPGD | CHEMBL516616                              | DTC |
| HPGD | HPGD | (4-CHLOROPHENYL)(MORPHOLINO)METHANETHIONE | DTC |
| HPGD | HPGD | KAEMPFEROL                                | DTC |
| HPGD | HPGD | STICTIC ACID                              | DTC |
| HPGD | HPGD | PENTABROMOPHENOL                          | DTC |
| HPGD | HPGD | IBUPROFEN                                 | NCI |
| HPGD | HPGD | CHEMBL585269                              | DTC |
| HPGD | HPGD | JUGLONE                                   | DTC |
| HPGD | HPGD | CEAROIN                                   | DTC |
| HPGD | HPGD | BENZOTHIAZYL DISULFIDE                    | DTC |
| HPGD | HPGD | LORECLEZOLE                               | DTC |
| HPGD | HPGD | CHEMBL53898                               | DTC |
| HPGD | HPGD | PYROGALLOL                                | DTC |
| HPGD | HPGD | CHEMBL80155                               | DTC |
| HPGD | HPGD | CHEMBL67535                               | DTC |
| HPGD | HPGD | CHEMBL261123                              | DTC |

|      |      |                               |     |
|------|------|-------------------------------|-----|
| HPGD | HPGD | CHEMBL1091971                 | DTC |
| HPGD | HPGD | DISULFIRAM                    | DTC |
| HPGD | HPGD | CHEMBL1465049                 | DTC |
| HPGD | HPGD | FLAVANONE                     | DTC |
| HPGD | HPGD | PLUMBAGIN                     | DTC |
| HPGD | HPGD | CHEMBL25230                   | DTC |
| HPGD | HPGD | DERRUBONE                     | DTC |
| HPGD | HPGD | ALPRAZOLAM                    | DTC |
| HPGD | HPGD | CHEMBL1459280                 | DTC |
| HPGD | HPGD | TPCK                          | DTC |
| HPGD | HPGD | CADMIUM DICHLORIDE            | DTC |
| HPGD | HPGD | CHEMBL39878                   | DTC |
| HPGD | HPGD | CHEMBL607309                  | DTC |
| HPGD | HPGD | CHEMBL35482                   | DTC |
| HPGD | HPGD | CHEMBL585628                  | DTC |
| HPGD | HPGD | PYRITHIONE ZINC               | DTC |
| HPGD | HPGD | PIPERINE                      | DTC |
| HPGD | HPGD | CHEMBL166486                  | DTC |
| HPGD | HPGD | CHEMBL395915                  | DTC |
| HPGD | HPGD | PAEONOL                       | DTC |
| HPGD | HPGD | NORSTICTIC ACID               | DTC |
| HPGD | HPGD | EBSELEN                       | DTC |
| HPGD | HPGD | 1,2-NAPHTHOQUINONE            | DTC |
| HPGD | HPGD | PHOSMET                       | DTC |
| HPGD | HPGD | CHEMBL1368535                 | DTC |
| HPGD | HPGD | U-0126                        | DTC |
| HPGD | HPGD | PEUCENIN                      | DTC |
| HPGD | HPGD | 7,8-DIHYDROXYFLAVONE          | DTC |
| HPGD | HPGD | CHEMBL1255936                 | DTC |
| HPGD | HPGD | CHEMBL595227                  | DTC |
| HPGD | HPGD | FENTICLOR                     | DTC |
| HPGD | HPGD | MESALAMINE                    | DTC |
| HPGD | HPGD | EMBELIN                       | DTC |
| HPGD | HPGD | 5,7-DIHYDROXYISOFLAVONE       | DTC |
| HPGD | HPGD | CHLORPROPHAM                  | DTC |
| HPGD | HPGD | DIHYDREXIDINE HYDROCHLORIDE   | DTC |
| HPGD | HPGD | CHEMBL222808                  | DTC |
| HPGD | HPGD | KETANSERIN                    | DTC |
| HPGD | HPGD | CHEMBL429095                  | DTC |
| HPGD | HPGD | FUMARPROTOCETRARIC ACID       | DTC |
| HPGD | HPGD | CHEMBL1332182                 | DTC |
| HPGD | HPGD | EMODIC ACID                   | DTC |
| HPGD | HPGD | QUERCETIN                     | DTC |
| HPGD | HPGD | PHENYLMERCURIC ACETATE        | DTC |
| HPGD | HPGD | HYDROQUINONE                  | DTC |
| HPGD | HPGD | FLUFENAMIC ACID               | DTC |
| HPGD | HPGD | OXYTETRACYCLINE HYDROCHLORIDE | DTC |
| HPGD | HPGD | SODIUM CHLORIDE               | NCI |
| HPGD | HPGD | CATECHOL                      | DTC |
| HPGD | HPGD | OXOGLAUCINE                   | DTC |
| HPGD | HPGD | GALLIC ACID                   | DTC |
| HPGD | HPGD | DANTHRON                      | DTC |
| HPGD | HPGD | TOLFENAMIC ACID               | DTC |
| HPGD | HPGD | CHEMBL72365                   | DTC |
| HPGD | HPGD | AMENTOFLAVONE                 | DTC |
| HPGD | HPGD | LINOLEIC ACID                 | DTC |
| HPGD | HPGD | TRICLOSAN                     | DTC |
| HPGD | HPGD | ARACHIDONOYL GLYCINE          | DTC |
| HPGD | HPGD | CHEMBL469309                  | DTC |
| HPGD | HPGD | THIRAM                        | DTC |
| HPGD | HPGD | TRANILAST                     | DTC |

|      |      |                                                |     |
|------|------|------------------------------------------------|-----|
| HPGD | HPGD | 3,4-DIDESMETHYL-5-DESHYDROXY-3'-ETHOXYSCLEROIN | DTC |
| HPGD | HPGD | NORDIHYDROGUAIARETIC ACID                      | DTC |
| HPGD | HPGD | KHELLIN                                        | DTC |
| HPGD | HPGD | E927A                                          | DTC |
| HPGD | HPGD | 2',BETA-DIHYDROXYCHALCONE                      | DTC |
| HPGD | HPGD | PHLORETIN                                      | DTC |
| HPGD | HPGD | GOSSYPOL                                       | DTC |
| HPGD | HPGD | PIRINIXIC ACID                                 | DTC |
| HPGD | HPGD | CHEMBL1388908                                  | DTC |
| HPGD | HPGD | SUPROFEN METHYL ESTER                          | DTC |
| HPGD | HPGD | DEPHOSTATIN                                    | DTC |
| HPGD | HPGD | ZAPRINAST                                      | DTC |
| HPGD | HPGD | KETANSERIN TARTRATE                            | DTC |
| HPGD | HPGD | CHEMBL56393                                    | DTC |
| HPGD | HPGD | CAPTAN                                         | DTC |
| HPGD | HPGD | CONGO RED                                      | DTC |
| HPGD | HPGD | ALTANSERIN                                     | DTC |
| HPGD | HPGD | BROMOENOL LACTONE                              | DTC |
| HPGD | HPGD | CHEMBL529138                                   | DTC |
| HPGD | HPGD | DNQX                                           | DTC |
| HPGD | HPGD | CHEMBL1214274                                  | DTC |
| HPGD | HPGD | CHEMBL452954                                   | DTC |
| HPGD | HPGD | FLAVONE                                        | DTC |
| HPGD | HPGD | ACETYLSEROTONIN                                | DTC |
| HPGD | HPGD | 2-MERCAPTOBENZOTHAZOLE                         | DTC |
| HPGD | HPGD | BENZBROMARONE                                  | DTC |
| HPGD | HPGD | SULFINPYRAZONE                                 | DTC |
| HPGD | HPGD | CHEMBL222556                                   | DTC |
| HPGD | HPGD | CHEMBL271023                                   | DTC |
| HPGD | HPGD | PAPAVERINE HYDROCHLORIDE                       | DTC |
| HPGD | HPGD | 2-BENZOYL-5-METHOXYBENZOQUINONE                | DTC |
| HPGD | HPGD | CHEMBL421215                                   | DTC |
| HPGD | HPGD | CARBIDOPA                                      | DTC |
| HPGD | HPGD | IRIGENOL                                       | DTC |
| HPGD | HPGD | MYRICETIN                                      | DTC |
| HPGD | HPGD | CHEMBL50267                                    | DTC |
| HPGD | HPGD | CHEMBL77387                                    | DTC |
| HPGD | HPGD | DITHIOLETHIONE                                 | DTC |
| HPGD | HPGD | FOSFONET                                       | DTC |
| HPGD | HPGD | CAPSAZEPINE                                    | DTC |
| HPGD | HPGD | CHEMBL1256291                                  | DTC |
| HPGD | HPGD | MUNDULONE                                      | DTC |
| HPGD | HPGD | BAICALEIN                                      | DTC |
| HPGD | HPGD | HEMATOXYLIN                                    | DTC |
| HPGD | HPGD | CHEMBL484663                                   | DTC |
| HPGD | HPGD | NITRAZEPAM                                     | DTC |
| HPGD | HPGD | METHYLDOPA (RACEMIC)                           | DTC |
| HPGD | HPGD | CHEMBL284609                                   | DTC |
| HPGD | HPGD | SULFANITRAN                                    | DTC |
| HPGD | HPGD | PENTACHLOROPHENOL                              | DTC |
| HPGD | HPGD | GW282974X                                      | DTC |
| HPGD | HPGD | LUZINDOLE                                      | DTC |
| HPGD | HPGD | TARENFLURBIL                                   | DTC |
| HPGD | HPGD | ONONETIN                                       | DTC |
| HPGD | HPGD | DIALLYLDISULFIDE                               | DTC |
| HPGD | HPGD | CHEMBL225513                                   | DTC |
| HPGD | HPGD | AMBUNOL                                        | DTC |
| HPGD | HPGD | CHEMBL1485420                                  | DTC |
| HPGD | HPGD | MECYSTEINE HYDROCHLORIDE                       | DTC |
| HPGD | HPGD | CHEMBL68534                                    | DTC |
| HPGD | HPGD | ZEARALENONE                                    | DTC |

|         |         |                                                |                      |                                                                                         |
|---------|---------|------------------------------------------------|----------------------|-----------------------------------------------------------------------------------------|
| HPGD    | HPGD    | BITHIONOL                                      |                      | DTC                                                                                     |
| HPGD    | HPGD    | 3-HYDROXYCOUMARIN                              |                      | DTC                                                                                     |
| HPGD    | HPGD    | KAINIC ACID                                    |                      | DTC                                                                                     |
| HPGD    | HPGD    | GENISTEIN                                      |                      | DTC                                                                                     |
| HPGD    | HPGD    | CLORGYLINE HYDROCHLORIDE                       |                      | DTC                                                                                     |
| HPGD    | HPGD    | CHLOROTHALONIL                                 |                      | DTC                                                                                     |
| HPGD    | HPGD    | EPHEDRINE SULFATE                              |                      | DTC                                                                                     |
| HPGD    | HPGD    | TRICLOFENOL                                    |                      | DTC                                                                                     |
| HPGD    | HPGD    | CHEMBL1214407                                  |                      | DTC                                                                                     |
| HPGD    | HPGD    | 7-CHLOROKYNURENIC ACID                         |                      | DTC                                                                                     |
| HPGD    | HPGD    | KOPARIN                                        |                      | DTC                                                                                     |
| HPGD    | HPGD    | DIHYDROXIDINE                                  |                      | DTC                                                                                     |
| HPGD    | HPGD    | CHEMBL242172                                   |                      | DTC                                                                                     |
| HPGD    | HPGD    | OMEPRAZOLE                                     |                      | DTC                                                                                     |
| HPGD    | HPGD    | 3,4-DIMETHOXYDALBERGIONE                       |                      | DTC                                                                                     |
| HPGD    | HPGD    | PYRROLIDINE DITHIOCARBAMIC ACID, AMMONIUM SALT |                      | DTC                                                                                     |
| HPGD    | HPGD    | CLOROPHENE                                     |                      | DTC                                                                                     |
| HPGD    | HPGD    | PYRROLIDINE DITHIOCARBAMATE                    |                      | DTC                                                                                     |
| HPGD    | HPGD    | 3-METHOXYCATECHOL                              |                      | DTC                                                                                     |
| ALDH1A2 | ALDH1A2 | RETINOL                                        |                      | NCI                                                                                     |
| ALDH1A2 | ALDH1A2 | HYDROCHLOROTHIAZIDE                            |                      | PharmGKB                                                                                |
| ALDH1A2 | ALDH1A2 | ATENOLOL                                       |                      | PharmGKB                                                                                |
| CTSS    | CTSS    | ODANACATIB                                     | inhibitor            | GuideToPharmacology                                                                     |
| CTSS    | CTSS    | PETESICATIB                                    | inhibitor            | GuideToPharmacology TTD                                                                 |
| CDK18   | CDK18   | AZD-5438                                       | inhibitor            | ChemblInteractions                                                                      |
| CDK18   | CDK18   | PHA-793887                                     | inhibitor            | ChemblInteractions                                                                      |
| CDK18   | CDK18   | RONICICLIB                                     | inhibitor            | ChemblInteractions                                                                      |
| CDK18   | CDK18   | AT-7519                                        | inhibitor            | ChemblInteractions                                                                      |
| CXCL10  | CXCL10  | ELDELUMAB                                      |                      | TdgClinicalTrial TTD                                                                    |
| CXCL10  | CXCL10  | RITONAVIR                                      |                      | NCI                                                                                     |
| CXCL10  | CXCL10  | NI-0801                                        | inhibitor            | ChemblInteractions TTD                                                                  |
| CXCL10  | CXCL10  | ATROPINE                                       |                      | NCI                                                                                     |
| CXCL10  | CXCL10  | ANTIBIOTIC                                     |                      | NCI                                                                                     |
| CXCL10  | CXCL10  | ATORVASTATIN                                   |                      | NCI                                                                                     |
| CXCL10  | CXCL10  | REGRAMOSTIM                                    |                      | NCI                                                                                     |
| CXCL10  | CXCL10  | METHYLPREDNISOLONE                             |                      | NCI                                                                                     |
| CXCL10  | CXCL10  | OXALIPLATIN                                    |                      | NCI                                                                                     |
| CXCL10  | CXCL10  | TESTOSTERONE                                   |                      | NCI                                                                                     |
| CXCL10  | CXCL10  | STAVUDINE                                      |                      | NCI                                                                                     |
| CXCL10  | CXCL10  | ZIDOVUDINE                                     |                      | NCI                                                                                     |
| PDGFRA  | PDGFRA  | IMATINIB                                       | inhibitor antagonist | DTC MyCancerGenome TdgClinicalTrial JAX-CKB CGI TEND DoCM COSMIC CIViC FDA OncoKB       |
| PDGFRA  | PDGFRA  | ILORASERTIB                                    | inhibitor            | DTC ChemblInteractions GuideToPharmacology                                              |
| PDGFRA  | PDGFRA  | ENMD-2076                                      | inhibitor            | TdgClinicalTrial GuideToPharmacology                                                    |
| PDGFRA  | PDGFRA  | FAMITINIB                                      | inhibitor            | ChemblInteractions TTD                                                                  |
| PDGFRA  | PDGFRA  | RIPRETINIB                                     | inhibitor            | JAX-CKB TTD                                                                             |
| PDGFRA  | PDGFRA  | DASATINIB                                      |                      | DTC JAX-CKB CGI DoCM CIViC OncoKB                                                       |
| PDGFRA  | PDGFRA  | VANDETANIB                                     |                      | DTC                                                                                     |
| PDGFRA  | PDGFRA  | LINIFANIB                                      | inhibitor            | DTC ChemblInteractions                                                                  |
| PDGFRA  | PDGFRA  | OLARATUMAB                                     | antagonist antibody  | MyCancerGenome TdgClinicalTrial ChemblInteractions GuideToPharmacology PharmGKB TTD FDA |
| PDGFRA  | PDGFRA  | CYC-116                                        |                      | DTC                                                                                     |
| PDGFRA  | PDGFRA  | AVAPRITINIB                                    |                      | JAX-CKB CIViC TTD                                                                       |
| PDGFRA  | PDGFRA  | AMUVATINIB                                     | inhibitor            | MyCancerGenome TdgClinicalTrial ChemblInteractions                                      |
| PDGFRA  | PDGFRA  | PAZOPANIB                                      | inhibitor            | TALC DTC MyCancerGenome MyCancerGenomeClinicalTrial                                     |
| PDGFRA  | PDGFRA  | NINTEDANIB                                     | inhibitor            | TALC MyCancerGenome TdgClinicalTrial ClarityFoundationClinicalTrial GuideToPharmacology |
| PDGFRA  | PDGFRA  | ENMD-981693                                    | inhibitor            | ChemblInteractions                                                                      |
| PDGFRA  | PDGFRA  | PD-0166285                                     |                      | DTC                                                                                     |
| PDGFRA  | PDGFRA  | PEGPLERANIB SODIUM                             |                      | TdgClinicalTrial                                                                        |
| PDGFRA  | PDGFRA  | REGORAFENIB                                    | inhibitor            | JAX-CKB ChemblInteractions CGI MyCancerGenomeClinicalTrial                              |
| PDGFRA  | PDGFRA  | TELATINIB                                      |                      | TdgClinicalTrial                                                                        |
| PDGFRA  | PDGFRA  | SORAFENIB                                      | inhibitor            | DTC CIViC MyCancerGenomeClinicalTrial                                                   |
| PDGFRA  | PDGFRA  | SU-014813                                      | inhibitor            | ChemblInteractions                                                                      |

|        |        |                                |                      |                                                                                     |
|--------|--------|--------------------------------|----------------------|-------------------------------------------------------------------------------------|
| PDGFRA | PDGFRA | TANDUTINIB                     | inhibitor            | DTC MyCancerGenome                                                                  |
| PDGFRA | PDGFRA | ROMIPLOSTIM                    |                      | TTD                                                                                 |
| PDGFRA | PDGFRA | FORETINIB                      | inhibitor            | ChEMBLInteractions                                                                  |
| PDGFRA | PDGFRA | MASITINIB                      | inhibitor            | TdgClinicalTrial ChEMBLInteractions GuideToPharmacology MyCancerGenomeClinicalTrial |
| PDGFRA | PDGFRA | R-406                          |                      | DTC                                                                                 |
| PDGFRA | PDGFRA | CARBOPLATIN                    |                      | JAX-CKB                                                                             |
| PDGFRA | PDGFRA | SUNITINIB                      | inhibitor            | TdgClinicalTrial JAX-CKB CGI TEND DoCM COSMIC CIViC MyCancerGenomeClinicalTrial     |
| PDGFRA | PDGFRA | DOVITINIB                      | inhibitor            | DTC ClarityFoundationClinicalTrial ChEMBLInteractions GuideToPharmacology           |
| PDGFRA | PDGFRA | X-82                           | inhibitor            | MyCancerGenome ChEMBLInteractions                                                   |
| PDGFRA | PDGFRA | PONATINIB                      | inhibitor            | DTC JAX-CKB CIViC                                                                   |
| PDGFRA | PDGFRA | CRENOLANIB                     | inhibitor            | MyCancerGenome JAX-CKB ChEMBLInteractions CGI DoCM CIViC GuideToPharmacology TTD    |
| PDGFRA | PDGFRA | QUIZARTINIB                    | inhibitor            | ChEMBLInteractions GuideToPharmacology                                              |
| PDGFRA | PDGFRA | MOTESANIB                      | inhibitor            | MyCancerGenome TdgClinicalTrial ChEMBLInteractions                                  |
| PDGFRA | PDGFRA | BECAPLERMIN                    | agonist              | TdgClinicalTrial ChEMBLInteractions TEND                                            |
| PDGFRA | PDGFRA | ORANTINIB                      | inhibitor            | ChEMBLInteractions                                                                  |
| PDGFRA | PDGFRA | CHEMBL406845                   |                      | DTC                                                                                 |
| PDGFRA | PDGFRA | LUCITANIB                      | inhibitor            | GuideToPharmacology                                                                 |
| PDGFRA | PDGFRA | SITRAVATINIB                   | inhibitor            | GuideToPharmacology                                                                 |
| PDGFRA | PDGFRA | CEDIRANIB                      | inhibitor            | DTC ChEMBLInteractions GuideToPharmacology                                          |
| PDGFRA | PDGFRA | AZD-1152-HQPA                  |                      | DTC                                                                                 |
| PDGFRA | PDGFRA | MIDOSTAURIN                    | antagonist inhibitor | MyCancerGenome ChEMBLInteractions                                                   |
| PDGFRA | PDGFRA | AST-487                        |                      | DTC                                                                                 |
| PDGFRA | PDGFRA | TOVETUMAB                      | antibody             | TALC MyCancerGenome TTD                                                             |
| PDGFRA | PDGFRA | GEFITINIB                      |                      | JAX-CKB                                                                             |
| PDGFRA | PDGFRA | NILOTINIB                      | inhibitor            | JAX-CKB MyCancerGenomeClinicalTrial                                                 |
| PDGFRA | PDGFRA | RABEPRAZOLE SODIUM             |                      | TTD                                                                                 |
| PDGFRA | PDGFRA | RAMUCIRUMAB                    | antibody             | TALC MyCancerGenome                                                                 |
| PDGFRA | PDGFRA | PACLITAXEL                     |                      | JAX-CKB                                                                             |
| PDGFRA | PDGFRA | CENISERTIB                     |                      | DTC                                                                                 |
| PDGFRA | PDGFRA | VISTUSERTIB                    |                      | JAX-CKB                                                                             |
| PDGFRA | PDGFRA | VATALANIB                      | inhibitor            | DTC TdgClinicalTrial ChEMBLInteractions                                             |
| PDGFRA | PDGFRA | XL-820                         | inhibitor            | ChEMBLInteractions TTD                                                              |
| PDGFRA | PDGFRA | SUNITINIB MALATE               | inhibitor            | ChEMBLInteractions                                                                  |
| PDGFRA | PDGFRA | TAE-684                        |                      | DTC                                                                                 |
| PDGFRA | PDGFRA | LENVATINIB                     | inhibitor            | TdgClinicalTrial                                                                    |
| PDGFRA | PDGFRA | CHEMBL202721                   |                      | DTC                                                                                 |
| PDGFRA | PDGFRA | TAK-593                        | inhibitor            | ChEMBLInteractions                                                                  |
| PDGFRA | PDGFRA | BARASERTIB                     |                      | DTC                                                                                 |
| PDGFRA | PDGFRA | RG-1530                        |                      | DTC                                                                                 |
| PDGFRA | PDGFRA | CHEMBL1997335                  |                      | DTC                                                                                 |
| PDGFRA | PDGFRA | XL-999                         | inhibitor            | ChEMBLInteractions                                                                  |
| PDGFRA | PDGFRA | NINTEDANIB ESYLATE             | inhibitor            | ChEMBLInteractions                                                                  |
| PDGFRA | PDGFRA | PAZOPANIB HYDROCHLORIDE        | inhibitor            | ChEMBLInteractions                                                                  |
| PDGFRA | PDGFRA | OSI-632                        |                      | DTC                                                                                 |
| PDGFRA | PDGFRA | AXITINIB                       |                      | TdgClinicalTrial                                                                    |
| P4HA1  | P4HA1  | PYRIDINE-2,5-DICARBOXYLIC ACID |                      | DTC                                                                                 |
| P4HA1  | P4HA1  | LUFIRONIL                      |                      | TTD                                                                                 |
| P4HA1  | P4HA1  | SAFIRONIL                      |                      | TTD                                                                                 |
| BIRC7  | BIRC7  | GDC-0152                       | antagonist           | GuideToPharmacology                                                                 |
| BIRC7  | BIRC7  | AT-406                         | antagonist           | TALC                                                                                |
| BIRC7  | BIRC7  | CISPLATIN                      |                      | CIViC                                                                               |
| HMGCS2 | HMGCS2 | HYDROCHLOROTHIAZIDE            |                      | PharmGKB                                                                            |
| HMGCS2 | HMGCS2 | CHLOROTHIAZIDE                 |                      | PharmGKB                                                                            |
| PLAT   | PLAT   | MELPHALAN                      |                      | NCI                                                                                 |
| PLAT   | PLAT   | BORTEZOMIB                     |                      | DTC                                                                                 |
| PLAT   | PLAT   | NAPROXEN                       |                      | NCI                                                                                 |
| PLAT   | PLAT   | UROKINASE                      |                      | TdgClinicalTrial                                                                    |
| PLAT   | PLAT   | EPOETIN BETA                   |                      | NCI                                                                                 |
| PLAT   | PLAT   | ATORVASTATIN                   |                      | NCI                                                                                 |
| PLAT   | PLAT   | RALOXIFENE                     |                      | NCI                                                                                 |
| PLAT   | PLAT   | CHEMBL290376                   | inhibitor            | GuideToPharmacology                                                                 |

|        |        |                   |                     |                                                                            |
|--------|--------|-------------------|---------------------|----------------------------------------------------------------------------|
| PLAT   | PLAT   | AMINOCAPROIC ACID | inhibitor           | ChembIInteractions                                                         |
| MYH14  | MYH14  | MAVACAMTEN        |                     | TTD                                                                        |
| C3AR1  | C3AR1  | CHEMBL389348      |                     | DTC                                                                        |
| CD74   | CD74   | MILATUZUMAB       | antagonist antibody | MyCancerGenome TdgClinicalTrial ChembIInteractions GuideToPharmacology TTD |
| PTHLH  | PTHLH  | VINBLASTINE       |                     | NCI                                                                        |
| PTHLH  | PTHLH  | CAL               | inhibitor           | ChembIInteractions                                                         |
| CCND1  | CCND1  | NIFEDIPINE        |                     | NCI                                                                        |
| CCND1  | CCND1  | BRICICLIB         | inhibitor           | ChembIInteractions TTD                                                     |
| CCND1  | CCND1  | FLUOROURACIL      |                     | PharmGKB                                                                   |
| CCND1  | CCND1  | METHOTREXATE      |                     | NCI PharmGKB                                                               |
| CCND1  | CCND1  | TAMOXIFEN         |                     | NCI CIViC                                                                  |
| CCND1  | CCND1  | LAPATINIB         |                     | PharmGKB                                                                   |
| CCND1  | CCND1  | ACETAMINOPHEN     |                     | NCI                                                                        |
| CCND1  | CCND1  | PALBOCICLIB       | inhibitor           | DTC ChembIInteractions                                                     |
| CCND1  | CCND1  | TROGLITAZONE      |                     | NCI                                                                        |
| CCND1  | CCND1  | PROGESTERONE      |                     | NCI                                                                        |
| CCND1  | CCND1  | GOSSYPOL          |                     | NCI                                                                        |
| CCND1  | CCND1  | RIBOCICLIB        |                     | ClarityFoundationBiomarkers CIViC                                          |
| CCND1  | CCND1  | URACIL            |                     | NCI                                                                        |
| CCND1  | CCND1  | ALVOCIDIB         |                     | DTC                                                                        |
| CCND1  | CCND1  | VITAMIN E         |                     | NCI                                                                        |
| CCND1  | CCND1  | ABEMACICLIB       |                     | ClarityFoundationBiomarkers                                                |
| CCND1  | CCND1  | SELICICLIB        |                     | DTC                                                                        |
| CCND1  | CCND1  | NAVITOCLAX        |                     | TTD                                                                        |
| CCND1  | CCND1  | CETUXIMAB         |                     | PharmGKB                                                                   |
| CCND1  | CCND1  | BORTEZOMIB        |                     | CIViC                                                                      |
| PTGER3 | PTGER3 | ENPROSTIL         | agonist             | GuideToPharmacology                                                        |
| PTGER3 | PTGER3 | DINOPROSTONE      | agonist             | DTC TdgClinicalTrial ChembIInteractions TEND GuideToPharmacology           |
| PTGER3 | PTGER3 | TREPROSTINIL      | agonist             | GuideToPharmacology                                                        |
| PTGER3 | PTGER3 | BUTAPROST         |                     | TTD                                                                        |
| PTGER3 | PTGER3 | SEPETAPROST       |                     | TTD                                                                        |
| PTGER3 | PTGER3 | CICAPROST         | agonist             | GuideToPharmacology                                                        |
| PTGER3 | PTGER3 | ILOPROST          | agonist             | GuideToPharmacology                                                        |
| PTGER3 | PTGER3 | SULPROSTONE       | agonist             | GuideToPharmacology                                                        |
| PTGER3 | PTGER3 | CLOPROSTENOL      | agonist             | GuideToPharmacology                                                        |
| PTGER3 | PTGER3 | CHEMBL565591      | antagonist          | GuideToPharmacology                                                        |
| PTGER3 | PTGER3 | CARBACYCLIN       | agonist             | GuideToPharmacology                                                        |
| PTGER3 | PTGER3 | BIMATOPROST       | agonist             | TdgClinicalTrial                                                           |
| PTGER3 | PTGER3 | FLUPROSTENOL      | agonist             | GuideToPharmacology                                                        |
| PTGER3 | PTGER3 | BERAPROST         | agonist             | GuideToPharmacology                                                        |
| PTGER3 | PTGER3 | MISOPROSTOL       | agonist             | ChembIInteractions NCI                                                     |
| PTGER3 | PTGER3 | ASPIRIN           |                     | PharmGKB                                                                   |
| PLAU   | PLAU   | RETINOL           |                     | NCI                                                                        |
| PLAU   | PLAU   | RAZOXANE          |                     | NCI                                                                        |
| PLAU   | PLAU   | ALENDRONIC ACID   |                     | NCI                                                                        |
| PLAU   | PLAU   | AMEDIPASE         |                     | TTD                                                                        |
| PLAU   | PLAU   | CARMUSTINE        |                     | NCI                                                                        |
| PLAU   | PLAU   | HYDROCORTISONE    |                     | NCI                                                                        |
| PLAU   | PLAU   | FILGRASTIM        |                     | NCI                                                                        |
| PLAU   | PLAU   | CALCITRIOL        |                     | NCI                                                                        |
| PLAU   | PLAU   | UROKINASE         |                     | TdgClinicalTrial TTD                                                       |
| PLAU   | PLAU   | IONOMYCIN         |                     | NCI                                                                        |
| PLAU   | PLAU   | VERAPAMIL         |                     | NCI                                                                        |
| PLAU   | PLAU   | UPAMOSTAT         | inhibitor           | TdgClinicalTrial GuideToPharmacology TTD                                   |
| PLAU   | PLAU   | CISPLATIN         |                     | NCI                                                                        |
| PLAU   | PLAU   | DACARBAZINE       |                     | NCI                                                                        |
| PLAU   | PLAU   | SIROLIMUS         |                     | NCI                                                                        |
| PLAU   | PLAU   | BLEOMYCIN         |                     | NCI                                                                        |
| PLAU   | PLAU   | CLODRONIC ACID    |                     | NCI                                                                        |
| PLAU   | PLAU   | ESTRADIOL         |                     | NCI                                                                        |
| PLAU   | PLAU   | ANTIBIOTIC        |                     | NCI                                                                        |

|          |          |                 |                    |                         |
|----------|----------|-----------------|--------------------|-------------------------|
| PLAU     | PLAU     | AZACITIDINE     |                    | NCI                     |
| PLAU     | PLAU     | IRESSA          |                    | NCI                     |
| PLAU     | PLAU     | PAPAVERINE      |                    | NCI                     |
| PLAU     | PLAU     | ZOLEDRONIC ACID |                    | NCI                     |
| PLAU     | PLAU     | GELDANAMYCIN    |                    | NCI                     |
| PLAU     | PLAU     | CELECOXIB       |                    | NCI                     |
| PLAU     | PLAU     | SARUPLASE       |                    | TTD                     |
| HLA-DQA1 | HLA-DQA1 | MERCAPTOPURINE  |                    | PharmGKB                |
| HLA-DQA1 | HLA-DQA1 | LAPATINIB       |                    | PharmGKB FDA            |
| HLA-DQA1 | HLA-DQA1 | AZATHIOPRINE    |                    | PharmGKB                |
| HLA-DQA1 | HLA-DQA1 | LUMIRACOXIB     |                    | PharmGKB                |
| KCNJ13   | KCNJ13   | DALFAMPRIDINE   | blocker            | GuideToPharmacology     |
| TGFB1    | TGFB1    | VERAPAMIL       |                    | NCI                     |
| TGFB1    | TGFB1    | TOREMIFENE      |                    | NCI                     |
| TGFB1    | TGFB1    | TAMOXIFEN       |                    | NCI                     |
| TGFB1    | TGFB1    | PIRFENIDONE     |                    | NCI TTD                 |
| TGFB1    | TGFB1    | TRIAMCINOLONE   |                    | NCI                     |
| TGFB1    | TGFB1    | HYDROCORTISONE  |                    | NCI                     |
| TGFB1    | TGFB1    | M-7824          |                    | TTD                     |
| TGFB1    | TGFB1    | INOSITOL        |                    | NCI                     |
| TGFB1    | TGFB1    | SILYBIN A       |                    | NCI                     |
| TGFB1    | TGFB1    | VACTOSERTIB     |                    | TTD                     |
| TGFB1    | TGFB1    | IRINOTECAN      |                    | PharmGKB                |
| TGFB1    | TGFB1    | SOTATERCEPT     |                    | TTD                     |
| TGFB1    | TGFB1    | GENISTEIN       |                    | NCI                     |
| TGFB1    | TGFB1    | FRESOLIMUMAB    | antibody inhibitor | TALC ChEMBLInteractions |
| TGFB1    | TGFB1    | NIS-793         |                    | TTD                     |
| TGFB1    | TGFB1    | RITUXIMAB       |                    | PharmGKB                |
| TGFB1    | TGFB1    | SANDOSTATIN     |                    | NCI                     |
| TGFB1    | TGFB1    | RAMIPRIL        |                    | NCI                     |
| TGFB1    | TGFB1    | STREPTOZOCIN    |                    | NCI                     |
| TGFB1    | TGFB1    | ASPIRIN         |                    | PharmGKB                |
| TGFB1    | TGFB1    | TESTOSTERONE    |                    | NCI                     |
| TGFB1    | TGFB1    | METELIMUMAB     | inhibitor          | ChEMBLInteractions      |
| TGFB1    | TGFB1    | ADRIAMYCIN      |                    | NCI                     |
| TGFB1    | TGFB1    | MELATONIN       |                    | NCI                     |
| TGFB1    | TGFB1    | DOXORUBICIN     |                    | NCI                     |
| TGFB1    | TGFB1    | CLADRIBINE      |                    | NCI                     |
| TGFB1    | TGFB1    | ATENOLOL        |                    | NCI                     |
| TGFB1    | TGFB1    | AMIFOSTINE      |                    | NCI                     |
| TGFB1    | TGFB1    | ETOPOSIDE       |                    | NCI                     |
| TGFB1    | TGFB1    | LY-2382770      | inhibitor          | ChEMBLInteractions      |
| TGFB1    | TGFB1    | NICOTINE        |                    | NCI                     |
| TGFB1    | TGFB1    | EMODIN          |                    | NCI                     |
| TGFB1    | TGFB1    | DISITERTIDE     |                    | TTD                     |
| TGFB1    | TGFB1    | VITAMIN E       |                    | NCI                     |
| TGFB1    | TGFB1    | FENRETINIDE     |                    | NCI                     |
| TGFB1    | TGFB1    | PIOGLITAZONE    |                    | NCI                     |
| TGFB1    | TGFB1    | GOSSYPOL        |                    | NCI                     |
| GRB14    | GRB14    | INSULIN         |                    | NCI                     |
| LAG3     | LAG3     | RELATLIMAB      | antibody           | GuideToPharmacology TTD |
| LAG3     | LAG3     | GSK2831781      |                    | TTD                     |
| CXCL13   | CXCL13   | RITUXIMAB       |                    | PharmGKB                |
| HLA-G    | HLA-G    | FLUOROURACIL    |                    | PharmGKB                |
| HLA-G    | HLA-G    | METHOTREXATE    |                    | PharmGKB                |
| HLA-G    | HLA-G    | CAPECITABINE    |                    | PharmGKB                |
| SLC44A4  | SLC44A4  | ASG-5ME         |                    | TTD                     |
| FBP1     | FBP1     | MB-07803        |                    | TdgClinicalTrial TTD    |
| SLC2A3   | SLC2A3   | RESVERATROL     |                    | DTC                     |
| SLC2A3   | SLC2A3   | INSULIN         |                    | NCI                     |
| SLC2A3   | SLC2A3   | GLUFOSFAMIDE    |                    | TdgClinicalTrial        |

|        |        |                                      |                      |                                                                                   |
|--------|--------|--------------------------------------|----------------------|-----------------------------------------------------------------------------------|
| COL6A2 | COL6A2 | COLLAGENASE CLOSTRIDIUM HISTOLYTICUM |                      | ChemblInteractions                                                                |
| COL6A2 | COL6A2 | OCRIPLASMIN                          |                      | ChemblInteractions                                                                |
| BIRC3  | BIRC3  | AT-406                               | antagonist           | TALC GuideToPharmacology TTD                                                      |
| BIRC3  | BIRC3  | GDC-0152                             | antagonist           | GuideToPharmacology                                                               |
| BIRC3  | BIRC3  | CHEMBL504559                         | antagonist           | GuideToPharmacology                                                               |
| BIRC3  | BIRC3  | BESTATIN METHYL ESTER                |                      | DTC                                                                               |
| BIRC3  | BIRC3  | BIRINAPANT                           | inhibitor antagonist | TALC ChemblInteractions                                                           |
| BIRC3  | BIRC3  | LCL-161                              | antagonist           | TALC                                                                              |
| BIRC3  | BIRC3  | CHEMBL481422                         | inhibitor            | GuideToPharmacology                                                               |
| SAMHD1 | SAMHD1 | STAVUDINE                            |                      | PharmGKB                                                                          |
| ASS1   | ASS1   | CHLOROQUINE                          |                      | CIViC                                                                             |
| ASS1   | ASS1   | PEGARGIMINASE                        |                      | CIViC                                                                             |
| NRP2   | NRP2   | DAUNORUBICIN                         |                      | PharmGKB                                                                          |
| ALOX5  | ALOX5  | TEPOXALIN                            |                      | TTD                                                                               |
| ALOX5  | ALOX5  | MESALAMINE                           | inhibitor            | TdgClinicalTrial ChemblInteractions                                               |
| ALOX5  | ALOX5  | TENIDAP                              |                      | TTD                                                                               |
| ALOX5  | ALOX5  | CHEMBL416038                         |                      | DTC                                                                               |
| ALOX5  | ALOX5  | PF-4191834                           | inhibitor            | GuideToPharmacology TTD                                                           |
| ALOX5  | ALOX5  | RILOPIROX                            |                      | TTD                                                                               |
| ALOX5  | ALOX5  | ZILEUTON                             | inhibitor            | DTC TdgClinicalTrial ChemblInteractions NCI TEND GuideToPharmacology PharmGKB TTD |
| ALOX5  | ALOX5  | SULFASALAZINE                        | inhibitor            | ChemblInteractions                                                                |
| ALOX5  | ALOX5  | SILYBIN A                            |                      | TTD                                                                               |
| ALOX5  | ALOX5  | DIETHYLCARBAMAZINE                   | inhibitor            | TTD                                                                               |
| ALOX5  | ALOX5  | MONTELUKAST                          | other/unknown        | PharmGKB                                                                          |
| ALOX5  | ALOX5  | TIPELUKAST                           |                      | TTD                                                                               |
| ALOX5  | ALOX5  | ATRELEUTON                           |                      | TdgClinicalTrial TTD                                                              |
| ALOX5  | ALOX5  | LICOFELONE                           |                      | TdgClinicalTrial                                                                  |
| ALOX5  | ALOX5  | 5-OXO-ETE                            |                      | DTC                                                                               |
| ALOX5  | ALOX5  | ACACETIN                             |                      | DTC                                                                               |
| ALOX5  | ALOX5  | DARBUFELONE                          |                      | TTD                                                                               |
| ALOX5  | ALOX5  | MELATONIN                            |                      | NCI                                                                               |
| ALOX5  | ALOX5  | MECLOFENAMATE SODIUM                 | inhibitor            | ChemblInteractions                                                                |
| ALOX5  | ALOX5  | CHEMBL502496                         |                      | DTC                                                                               |
| ALOX5  | ALOX5  | BALSALAZIDE DISODIUM                 | inhibitor            | ChemblInteractions                                                                |
| ALOX5  | ALOX5  | BALSALAZIDE                          | inhibitor            | TdgClinicalTrial                                                                  |
| ALOX5  | ALOX5  | METHOTREXATE                         |                      | NCI                                                                               |
| ALOX5  | ALOX5  | 6BIO                                 |                      | DTC                                                                               |
| ALOX5  | ALOX5  | OLSALAZINE SODIUM                    | inhibitor            | ChemblInteractions                                                                |
| CA2    | CA2    | DICHLORPHENAMIDE                     | inhibitor            | ChemblInteractions TTD                                                            |
| CA2    | CA2    | DORZOLAMIDE                          | inhibitor            | NCI TTD                                                                           |
| CA2    | CA2    | ACETAZOLAMIDE                        | inhibitor            | TdgClinicalTrial ChemblInteractions TEND                                          |
| CA2    | CA2    | SULFAMIDE                            |                      | TTD                                                                               |
| CA2    | CA2    | ETHINAMATE                           | inhibitor            | TTD                                                                               |
| CA2    | CA2    | BRINZOLAMIDE                         | inhibitor            | TdgClinicalTrial ChemblInteractions TEND                                          |
| CA2    | CA2    | CYCLOTHIAZIDE                        | inhibitor            | TTD                                                                               |
| CA2    | CA2    | ETHOXZOLAMIDE                        | inhibitor            | ChemblInteractions TTD                                                            |
| CA2    | CA2    | TRICHLORMETHIAZIDE                   | inhibitor            | TdgClinicalTrial TEND                                                             |
| CA2    | CA2    | BENZTHIAZIDE                         | inhibitor            | TTD                                                                               |
| CA2    | CA2    | CHLOROTHIAZIDE                       | inhibitor            | TdgClinicalTrial TEND TTD                                                         |
| CA2    | CA2    | SULTHIAME                            |                      | TTD                                                                               |
| CA2    | CA2    | POLMACOXIB                           | inhibitor            | ChemblInteractions TTD                                                            |
| CA2    | CA2    | CURCUMIN                             |                      | TTD                                                                               |
| CA2    | CA2    | PARABEN                              |                      | TTD                                                                               |
| CA2    | CA2    | TOPIRAMATE                           | inhibitor            | TdgClinicalTrial ChemblInteractions TEND                                          |
| CA2    | CA2    | DORZOLAMIDE HYDROCHLORIDE            | inhibitor            | ChemblInteractions                                                                |
| CA2    | CA2    | METHAZOLAMIDE                        | inhibitor            | ChemblInteractions                                                                |
| CA2    | CA2    | SULFAMYLON                           |                      | TTD                                                                               |
| CA2    | CA2    | ACETAZOLAMIDE SODIUM                 | inhibitor            | ChemblInteractions                                                                |
| CA2    | CA2    | PHENOL                               |                      | TTD                                                                               |
| CA2    | CA2    | EPOETIN ALFA                         |                      | NCI                                                                               |
| CA2    | CA2    | GUAIACOL                             |                      | TTD                                                                               |



|          |          |                                      |            |                                            |
|----------|----------|--------------------------------------|------------|--------------------------------------------|
| SLC2A1   | SLC2A1   | DIAZEPAM                             |            | NCI                                        |
| SLC2A1   | SLC2A1   | PIOGLITAZONE                         |            | NCI                                        |
| SLC2A1   | SLC2A1   | GENISTEIN                            |            | NCI                                        |
| SLC2A1   | SLC2A1   | TRIAMCINOLONE                        |            | NCI                                        |
| SLC2A1   | SLC2A1   | THIOCTIC ACID                        |            | DTC                                        |
| SLC2A1   | SLC2A1   | PROGESTERONE                         |            | NCI                                        |
| SLC2A1   | SLC2A1   | GLUFOSFAMIDE                         |            | TdgClinicalTrial                           |
| SLC2A1   | SLC2A1   | THYMIDINE                            |            | NCI                                        |
| SLC2A1   | SLC2A1   | PHENYTOIN                            |            | NCI                                        |
| SLC2A1   | SLC2A1   | ROSIGLITAZONE                        |            | NCI                                        |
| SLC2A1   | SLC2A1   | GENTAMICIN                           |            | NCI                                        |
| CD200    | CD200    | SAMALIZUMAB                          | inhibitor  | ChemblInteractions TTD                     |
| SLFN11   | SLFN11   | NIRAPARIB                            |            | CIViC                                      |
| SLFN11   | SLFN11   | TEMOZOLOMIDE                         |            | CIViC                                      |
| SLFN11   | SLFN11   | TALAZOPARIB                          |            | CIViC                                      |
| MCHR1    | MCHR1    | CHEMBL178707                         | antagonist | GuideToPharmacology TTD                    |
| MCHR1    | MCHR1    | SNAP-7941                            | antagonist | GuideToPharmacology TTD                    |
| MCHR1    | MCHR1    | CHEMBL2110360                        | antagonist | DTC GuideToPharmacology                    |
| MCHR1    | MCHR1    | BMS-830216                           |            | TTD                                        |
| MCHR1    | MCHR1    | CHEMBL214957                         | antagonist | GuideToPharmacology                        |
| PSORS1C3 | PSORS1C3 | ALLOPURINOL                          |            | PharmGKB                                   |
| AXL      | AXL      | DASATINIB                            |            | DTC                                        |
| AXL      | AXL      | PF-00562271                          |            | DTC                                        |
| AXL      | AXL      | GILTERITINIB                         | inhibitor  | ChemblInteractions GuideToPharmacology TTD |
| AXL      | AXL      | HESPERADIN                           | inhibitor  | DTC                                        |
| AXL      | AXL      | BMS-754807                           |            | DTC                                        |
| AXL      | AXL      | DUBERMATINIB                         | inhibitor  | GuideToPharmacology TTD                    |
| AXL      | AXL      | GLESATINIB                           |            | TTD                                        |
| AXL      | AXL      | CEDIRANIB                            |            | DTC                                        |
| AXL      | AXL      | GW843682X                            |            | DTC                                        |
| AXL      | AXL      | LINIFANIB                            |            | DTC                                        |
| AXL      | AXL      | R428                                 | inhibitor  | ChemblInteractions                         |
| AXL      | AXL      | BEMCENTINIB                          | inhibitor  | GuideToPharmacology TTD                    |
| AXL      | AXL      | BPI-9016                             | inhibitor  | ChemblInteractions                         |
| AXL      | AXL      | SORAFENIB                            |            | DTC                                        |
| AXL      | AXL      | OSI-632                              |            | DTC                                        |
| AXL      | AXL      | ILORASERTIB                          |            | DTC                                        |
| AXL      | AXL      | GONIOTHALAMIN                        |            | DTC                                        |
| AXL      | AXL      | BI-505                               |            | TTD                                        |
| AXL      | AXL      | SITRAVATINIB                         | inhibitor  | GuideToPharmacology                        |
| AXL      | AXL      | MERESTINIB                           | inhibitor  | GuideToPharmacology                        |
| AXL      | AXL      | DOVITINIB                            |            | DTC                                        |
| AXL      | AXL      | BMS-777607                           | inhibitor  | GuideToPharmacology                        |
| AXL      | AXL      | VANDETANIB                           |            | DTC                                        |
| AXL      | AXL      | GEFITINIB                            |            | DTC                                        |
| AXL      | AXL      | TAE-684                              |            | DTC                                        |
| AXL      | AXL      | CENISERTIB                           |            | DTC                                        |
| AXL      | AXL      | ENTRECTINIB                          |            | DTC                                        |
| AXL      | AXL      | TOZASERTIB                           |            | DTC                                        |
| TFAP2A   | TFAP2A   | NELFINAVIR                           |            | NCI                                        |
| TFAP2A   | TFAP2A   | INDINAVIR                            |            | NCI                                        |
| TFAP2A   | TFAP2A   | AMPRENAVIR                           |            | NCI                                        |
| COL4A1   | COL4A1   | OCRIPLASMIN                          |            | ChemblInteractions                         |
| COL4A1   | COL4A1   | COLLAGENASE CLOSTRIDIUM HISTOLYTICUM |            | ChemblInteractions                         |
| NTRK2    | NTRK2    | LITHIUM                              |            | NCI PharmGKB                               |
| NTRK2    | NTRK2    | AST-487                              |            | DTC                                        |
| NTRK2    | NTRK2    | PILOCARPINE                          |            | NCI                                        |
| NTRK2    | NTRK2    | AZD-7451                             | inhibitor  | ChemblInteractions                         |
| NTRK2    | NTRK2    | CHEMBL546797                         |            | DTC                                        |
| NTRK2    | NTRK2    | DORAMAPIMOD                          |            | DTC                                        |
| NTRK2    | NTRK2    | ENTRECTINIB                          | inhibitor  | DTC CIViC PharmGKB OncoKB                  |

|       |       |                         |           |                                     |
|-------|-------|-------------------------|-----------|-------------------------------------|
| NTRK2 | NTRK2 | LAROTRECTINIB           | inhibitor | ChemblInteractions CIViC TTD OncoKB |
| NTRK2 | NTRK2 | HESPERADIN              | inhibitor | DTC                                 |
| NTRK2 | NTRK2 | SORAFENIB               |           | DTC                                 |
| NTRK2 | NTRK2 | ALTIRATINIB             | inhibitor | ChemblInteractions                  |
| NTRK2 | NTRK2 | CISPLATIN               |           | NCI                                 |
| NTRK2 | NTRK2 | MK-2461                 | inhibitor | GuideToPharmacology TTD             |
| NTRK2 | NTRK2 | TOZASERTIB              |           | DTC                                 |
| NTRK2 | NTRK2 | DOVITINIB               |           | DTC                                 |
| NTRK2 | NTRK2 | CEP-2563                | inhibitor | ChemblInteractions                  |
| NTRK2 | NTRK2 | SNS-314                 |           | DTC                                 |
| NTRK2 | NTRK2 | CORTICOTROPIN           |           | NCI                                 |
| NTRK2 | NTRK2 | DITIOCARB               |           | NCI                                 |
| NTRK2 | NTRK2 | GW632580X               |           | DTC                                 |
| NTRK2 | NTRK2 | PF-00562271             |           | DTC                                 |
| NTRK2 | NTRK2 | METHADONE               |           | PharmGKB                            |
| NTRK2 | NTRK2 | PLX-7486                | inhibitor | ChemblInteractions                  |
| NTRK2 | NTRK2 | LINIFANIB               |           | DTC                                 |
| NTRK2 | NTRK2 | CHEMBL202721            |           | DTC                                 |
| NTRK2 | NTRK2 | SB-202190               |           | DTC                                 |
| NTRK2 | NTRK2 | AZD-6918                | inhibitor | ChemblInteractions                  |
| NTRK2 | NTRK2 | SP-600125               |           | DTC                                 |
| NTRK2 | NTRK2 | LAUROGUADINE            |           | DTC                                 |
| NTRK2 | NTRK2 | JNJ-7706621             |           | DTC                                 |
| NTRK2 | NTRK2 | CLOZAPINE               |           | PharmGKB                            |
| NTRK2 | NTRK2 | R-406                   |           | DTC                                 |
| NTRK2 | NTRK2 | LESTAURTINIB            | inhibitor | TdgClinicalTrial ChemblInteractions |
| NTRK2 | NTRK2 | ILORASERTIB             |           | DTC                                 |
| NTRK2 | NTRK2 | SELITRECTINIB           | inhibitor | GuideToPharmacology                 |
| NTRK2 | NTRK2 | CEP-11981               | inhibitor | GuideToPharmacology                 |
| NTRK2 | NTRK2 | RG-1530                 |           | DTC                                 |
| NTRK2 | NTRK2 | GW441756X               |           | DTC                                 |
| NTRK2 | NTRK2 | ALISERTIB               |           | DTC                                 |
| NTRK2 | NTRK2 | CENISERTIB              |           | DTC                                 |
| NTRK2 | NTRK2 | PD-0166285              |           | DTC                                 |
| NTRK2 | NTRK2 | GAMBOGIC AMIDE          |           | DTC                                 |
| NTRK2 | NTRK2 | DOXORUBICIN             |           | NCI                                 |
| NTRK2 | NTRK2 | BMS-754807              |           | DTC                                 |
| NTRK2 | NTRK2 | REPOTRECTINIB           | inhibitor | GuideToPharmacology                 |
| USP2  | USP2  | QUINALIZARIN            |           | DTC                                 |
| USP2  | USP2  | THONZONIUM BROMIDE      |           | DTC                                 |
| USP2  | USP2  | DEPHOSTATIN             |           | DTC                                 |
| USP2  | USP2  | SURAMIN                 |           | DTC                                 |
| USP2  | USP2  | CALMIDAZOLIUM CHLORIDE  |           | DTC                                 |
| USP2  | USP2  | ZAPRINAST               |           | DTC                                 |
| USP2  | USP2  | CHEMBL461579            |           | DTC                                 |
| USP2  | USP2  | JUGLONE                 |           | DTC                                 |
| USP2  | USP2  | SENNOSIDE B             |           | DTC                                 |
| USP2  | USP2  | ELLAGIC ACID            |           | DTC                                 |
| USP2  | USP2  | CADMIUM ACETATE         |           | DTC                                 |
| USP2  | USP2  | CHEMBL56393             |           | DTC                                 |
| USP2  | USP2  | HEXACHLOROPHENE         |           | DTC                                 |
| USP2  | USP2  | CURCUMIN                |           | DTC                                 |
| USP2  | USP2  | MANGOSTIN               |           | DTC                                 |
| USP2  | USP2  | AURINTRICARBOXYLIC ACID |           | DTC                                 |
| USP2  | USP2  | GOSSYPOL                |           | DTC                                 |
| USP2  | USP2  | CHEMBL578741            |           | DTC                                 |
| USP2  | USP2  | TANNIC ACID             |           | DTC                                 |
| USP2  | USP2  | ALEXIDINE HYDROCHLORIDE |           | DTC                                 |
| USP2  | USP2  | ROBUSTIC ACID           |           | DTC                                 |
| USP2  | USP2  | GENTIAN VIOLET          |           | DTC                                 |
| USP2  | USP2  | CLOFOCTOL               |           | DTC                                 |

|       |       |                         |            |  |
|-------|-------|-------------------------|------------|--|
| USP2  | USP2  | CHAULMOSULFONE          |            |  |
| USP2  | USP2  | ALLOXAN                 |            |  |
| USP2  | USP2  | IDOACETAMIDE            |            |  |
| CD14  | CD14  | IC14                    | inhibitor  |  |
| CD14  | CD14  | LOVASTATIN              |            |  |
| CSF1R | CSF1R | SUNITINIB MALATE        | inhibitor  |  |
| CSF1R | CSF1R | ZOTIRACICLIB            | inhibitor  |  |
| CSF1R | CSF1R | AST-487                 |            |  |
| CSF1R | CSF1R | CERDULATINIB            | inhibitor  |  |
| CSF1R | CSF1R | DASATINIB               | inhibitor  |  |
| CSF1R | CSF1R | GW843682X               |            |  |
| CSF1R | CSF1R | SURUFATINIB             |            |  |
| CSF1R | CSF1R | GW632580X               |            |  |
| CSF1R | CSF1R | IMATINIB                | antagonist |  |
| CSF1R | CSF1R | CYC-116                 |            |  |
| CSF1R | CSF1R | REGRAMOSTIM             |            |  |
| CSF1R | CSF1R | CC-223                  | inhibitor  |  |
| CSF1R | CSF1R | ARRY-382                | inhibitor  |  |
| CSF1R | CSF1R | EMACTUZUMAB             | antibody   |  |
| CSF1R | CSF1R | CRENOLANIB              | inhibitor  |  |
| CSF1R | CSF1R | TANDUTINIB              | inhibitor  |  |
| CSF1R | CSF1R | PLX-5622                | inhibitor  |  |
| CSF1R | CSF1R | QUIZARTINIB             | inhibitor  |  |
| CSF1R | CSF1R | HESPERADIN              | inhibitor  |  |
| CSF1R | CSF1R | EDICOTINIB              | inhibitor  |  |
| CSF1R | CSF1R | PEXIDARTINIB            | inhibitor  |  |
| CSF1R | CSF1R | DOVITINIB               | inhibitor  |  |
| CSF1R | CSF1R | PLX-7486                | inhibitor  |  |
| CSF1R | CSF1R | CENISERTIB              |            |  |
| CSF1R | CSF1R | SUNITINIB               | inhibitor  |  |
| CSF1R | CSF1R | CEDIRANIB               | inhibitor  |  |
| CSF1R | CSF1R | KENPAULLONE             |            |  |
| CSF1R | CSF1R | LINIFANIB               | inhibitor  |  |
| CSF1R | CSF1R | OSI-930                 | inhibitor  |  |
| CSF1R | CSF1R | CHEMBL365617            |            |  |
| CSF1R | CSF1R | PROGESTERONE            |            |  |
| CSF1R | CSF1R | PAZOPANIB               | inhibitor  |  |
| CSF1R | CSF1R | MCS-110                 |            |  |
| CSF1R | CSF1R | VEMURAFENIB             |            |  |
| CSF1R | CSF1R | SORAFENIB               |            |  |
| CSF1R | CSF1R | CHEMBL1908396           | inhibitor  |  |
| CSF1R | CSF1R | CHEMBL406375            | inhibitor  |  |
| CSF1R | CSF1R | CILMOSTIM               |            |  |
| CSF1R | CSF1R | CT-1578                 | inhibitor  |  |
| CSF1R | CSF1R | SP-600125               |            |  |
| CSF1R | CSF1R | CHEMBL1908395           | inhibitor  |  |
| CSF1R | CSF1R | CHEMBL546797            |            |  |
| CSF1R | CSF1R | DACTOLISIB              |            |  |
| CSF1R | CSF1R | PAZOPANIB HYDROCHLORIDE | inhibitor  |  |
| CSF1R | CSF1R | ILORASERTIB             | inhibitor  |  |
| CSF1R | CSF1R | PD-0166285              |            |  |
| CSF1R | CSF1R | JNJ-7706621             |            |  |
| CSF1R | CSF1R | ENMD-2076               | inhibitor  |  |
| CSF1R | CSF1R | VATALANIB               | inhibitor  |  |
| CSF1R | CSF1R | GO-6976                 |            |  |
| CSF1R | CSF1R | RG-1530                 |            |  |
| CSF1R | CSF1R | TAE-684                 |            |  |
| CSF1R | CSF1R | CABIRALIZUMAB           | antibody   |  |
| CSF1R | CSF1R | IMC-CS4                 |            |  |
| CSF1R | CSF1R | MASITINIB               |            |  |
| CSF1R | CSF1R | ENTRECTINIB             |            |  |

|                                                                                   |
|-----------------------------------------------------------------------------------|
| DTC                                                                               |
| DTC                                                                               |
| DTC                                                                               |
| TdgClinicalTrial ChemblInteractions TTD                                           |
| NCI                                                                               |
| ChemblInteractions                                                                |
| GuideToPharmacology                                                               |
| DTC                                                                               |
| GuideToPharmacology                                                               |
| TALC                                                                              |
| DTC                                                                               |
| TTD                                                                               |
| DTC                                                                               |
| DTC TdgClinicalTrial JAX-CKB CGI TEND DoCM CIViC                                  |
| DTC                                                                               |
| GuideToPharmacology                                                               |
| GuideToPharmacology                                                               |
| ChemblInteractions GuideToPharmacology TTD                                        |
| GuideToPharmacology                                                               |
| GuideToPharmacology                                                               |
| DTC GuideToPharmacology                                                           |
| ChemblInteractions                                                                |
| ChemblInteractions GuideToPharmacology                                            |
| DTC                                                                               |
| ChemblInteractions GuideToPharmacology TTD                                        |
| MyCancerGenome JAX-CKB ChemblInteractions CIViC GuideToPharmacology CancerCommons |
| DTC ClarityFoundationClinicalTrial CIViC GuideToPharmacology                      |
| ChemblInteractions                                                                |
| DTC                                                                               |
| TEND                                                                              |
| DTC GuideToPharmacology                                                           |
| DTC                                                                               |
| DTC TdgClinicalTrial ChemblInteractions GuideToPharmacology                       |
| GuideToPharmacology                                                               |
| DTC                                                                               |
| NCI                                                                               |
| DTC GuideToPharmacology                                                           |
| TTD                                                                               |
| JAX-CKB                                                                           |
| DTC JAX-CKB                                                                       |
| GuideToPharmacology                                                               |
| GuideToPharmacology                                                               |
| GuideToPharmacology                                                               |
| ChemblInteractions                                                                |
| DTC                                                                               |
| GuideToPharmacology                                                               |
| DTC                                                                               |
| DTC                                                                               |
| ChemblInteractions                                                                |
| DTC GuideToPharmacology                                                           |
| DTC                                                                               |
| DTC                                                                               |
| TdgClinicalTrial ChemblInteractions                                               |
| DTC ChemblInteractions CIViC                                                      |
| DTC                                                                               |
| DTC                                                                               |
| DTC                                                                               |
| GuideToPharmacology TTD                                                           |
| TTD                                                                               |
| TdgClinicalTrial                                                                  |
| DTC                                                                               |

|          |          |                                      |           |                        |
|----------|----------|--------------------------------------|-----------|------------------------|
| CSF1R    | CSF1R    | ALSTERPAULLONE                       | inhibitor | DTC                    |
| CSF1R    | CSF1R    | FILGRASTIM                           |           | GuideToPharmacology    |
| CSF1R    | CSF1R    | PD-360324                            |           | TTD                    |
| CSF1R    | CSF1R    | CHEMBL541400                         |           | DTC                    |
| SLC5A3   | SLC5A3   | PHLORIZIN                            |           | GuideToPharmacology    |
| SLC22A7  | SLC22A7  | CAPECITABINE                         |           | PharmGKB               |
| SLC22A7  | SLC22A7  | ZIDOVUDINE                           |           | PharmGKB               |
| SLC22A7  | SLC22A7  | GS-9256                              |           | DTC                    |
| PTPRC    | PTPRC    | HYDROGEN PEROXIDE                    |           | DTC                    |
| PTPRC    | PTPRC    | PREDNISON                            |           | NCI                    |
| PTPRC    | PTPRC    | EPOETIN BETA                         |           | NCI                    |
| PTPRC    | PTPRC    | ETANERCEPT                           |           | PharmGKB               |
| PTPRC    | PTPRC    | ADALIMUMAB                           |           | PharmGKB               |
| PTPRC    | PTPRC    | CHEMBL204543                         |           | DTC                    |
| PTPRC    | PTPRC    | APAMISTAMAB IODINE I-131             |           | TTD                    |
| PTPRC    | PTPRC    | ALENDRONIC ACID                      |           | DTC                    |
| PTPRC    | PTPRC    | FLUOROURACIL                         |           | NCI                    |
| PTPRC    | PTPRC    | HYDROCORTISONE                       |           | NCI                    |
| PTPRC    | PTPRC    | ESTRADIOL                            |           | NCI                    |
| PTPRC    | PTPRC    | INFLIXIMAB                           |           | PharmGKB               |
| COL5A2   | COL5A2   | OCRIPLASMIN                          |           | ChEMBLInteractions     |
| COL5A2   | COL5A2   | COLLAGENASE CLOSTRIDIUM HISTOLYTICUM |           | ChEMBLInteractions     |
| HLA-DRB1 | HLA-DRB1 | FLUPIRTINE                           |           | PharmGKB               |
| HLA-DRB1 | HLA-DRB1 | FLUVASTATIN                          |           | PharmGKB               |
| HLA-DRB1 | HLA-DRB1 | METHIMAZOLE                          |           | PharmGKB               |
| HLA-DRB1 | HLA-DRB1 | ASPIRIN                              |           | PharmGKB               |
| HLA-DRB1 | HLA-DRB1 | LYM-1                                |           | ChEMBLInteractions TTD |
| HLA-DRB1 | HLA-DRB1 | EFAVIRENZ                            |           | PharmGKB               |
| HLA-DRB1 | HLA-DRB1 | INFLIXIMAB                           |           | PharmGKB               |
| HLA-DRB1 | HLA-DRB1 | ADALIMUMAB                           |           | PharmGKB               |
| HLA-DRB1 | HLA-DRB1 | PROPYLTHIOURACIL                     |           | PharmGKB               |
| HLA-DRB1 | HLA-DRB1 | LAPATINIB                            |           | PharmGKB FDA           |
| HLA-DRB1 | HLA-DRB1 | PITAVASTATIN                         |           | PharmGKB               |
| HLA-DRB1 | HLA-DRB1 | SIMVASTATIN                          |           | PharmGKB               |
| HLA-DRB1 | HLA-DRB1 | DABRAFENIB                           |           | PharmGKB               |
| HLA-DRB1 | HLA-DRB1 | PRAVASTATIN                          |           | PharmGKB               |
| HLA-DRB1 | HLA-DRB1 | BUCILLAMINE                          |           | PharmGKB               |
| HLA-DRB1 | HLA-DRB1 | ATORVASTATIN                         |           | PharmGKB               |
| HLA-DRB1 | HLA-DRB1 | ASPARAGINASE                         |           | PharmGKB               |
| HLA-DRB1 | HLA-DRB1 | CARBIMAZOLE                          |           | PharmGKB               |
| HLA-DRB1 | HLA-DRB1 | DAPSONE                              |           | PharmGKB               |
| HLA-DRB1 | HLA-DRB1 | LUMIRACOXIB                          |           | PharmGKB               |
| HLA-DRB1 | HLA-DRB1 | CARBAMAZEPINE                        |           | PharmGKB               |
| HLA-DRB1 | HLA-DRB1 | CLAVULANIC ACID                      |           | PharmGKB               |
| HLA-DRB1 | HLA-DRB1 | ETANERCEPT                           |           | PharmGKB               |
| HLA-DRB1 | HLA-DRB1 | OXCARBAZEPINE                        |           | PharmGKB               |
| HLA-DRB1 | HLA-DRB1 | LAMOTRIGINE                          |           | PharmGKB               |
| HLA-DRB1 | HLA-DRB1 | FLOXACILLIN                          |           | PharmGKB               |
| HLA-DRB1 | HLA-DRB1 | ROSUVASTATIN                         |           | PharmGKB               |
| HLA-DRB1 | HLA-DRB1 | AMOXICILLIN                          |           | PharmGKB               |
| HLA-DRB1 | HLA-DRB1 | MERCAPTOPURINE                       |           | PharmGKB               |
| HLA-DRB1 | HLA-DRB1 | TICLOPIDINE                          |           | PharmGKB               |
| HLA-DRB1 | HLA-DRB1 | AZATHIOPRINE                         |           | PharmGKB               |
| MUC1     | MUC1     | HUHMFG1                              |           | TdgClinicalTrial TTD   |
| MUC1     | MUC1     | SAR-566658                           |           | TTD                    |
| MUC1     | MUC1     | EMEPEPIMUT-S                         |           | TTD                    |
| MUC1     | MUC1     | GO-203-2C                            |           | TdgClinicalTrial TTD   |
| HLA-DRA  | HLA-DRA  | AMOXICILLIN                          |           | PharmGKB               |
| HLA-DRA  | HLA-DRA  | CLAVULANIC ACID                      |           | PharmGKB               |
| HLA-DRA  | HLA-DRA  | PEMBROLIZUMAB                        |           | CIViC                  |
| HLA-DRA  | HLA-DRA  | NIVOLUMAB                            |           | CIViC                  |

|         |         |                                |           |                                        |
|---------|---------|--------------------------------|-----------|----------------------------------------|
| HLA-DRA | HLA-DRA | FLOXACILLIN                    |           | PharmGKB                               |
| HLA-DRA | HLA-DRA | ATEZOLIZUMAB                   |           | CIViC                                  |
| SLC29A4 | SLC29A4 | FLUOXETINE                     | inhibitor | GuideToPharmacology                    |
| SLC29A4 | SLC29A4 | CIMETIDINE                     | inhibitor | GuideToPharmacology                    |
| SLC29A4 | SLC29A4 | METFORMIN                      |           | PharmGKB                               |
| SLC29A4 | SLC29A4 | HISTAMINE                      |           | DTC                                    |
| SLC29A4 | SLC29A4 | QUININE                        | inhibitor | GuideToPharmacology                    |
| SLC29A4 | SLC29A4 | QUINIDINE                      | inhibitor | GuideToPharmacology                    |
| SLC29A4 | SLC29A4 | DIPYRIDAMOLE                   | inhibitor | GuideToPharmacology                    |
| SLC29A4 | SLC29A4 | RHODAMINE123                   | inhibitor | GuideToPharmacology                    |
| SLC29A4 | SLC29A4 | DESIPRAMINE                    | inhibitor | GuideToPharmacology                    |
| SLC29A4 | SLC29A4 | VERAPAMIL                      | inhibitor | GuideToPharmacology                    |
| KCNMA1  | KCNMA1  | CHLORZOXAZONE                  |           | TdgClinicalTrial TEND                  |
| KCNMA1  | KCNMA1  | ANDOLAST                       | activator | ChemblInteractions                     |
| KCNMA1  | KCNMA1  | FLINDOKALNER                   | activator | ChemblInteractions GuideToPharmacology |
| KCNMA1  | KCNMA1  | TRICHLORMETHIAZIDE             |           | TdgClinicalTrial TEND                  |
| KCNMA1  | KCNMA1  | ENFLURANE                      |           | TdgClinicalTrial TEND                  |
| KCNMA1  | KCNMA1  | CHEMBL1290115                  | activator | GuideToPharmacology                    |
| KCNMA1  | KCNMA1  | BMS-223131                     | activator | ChemblInteractions                     |
| KCNMA1  | KCNMA1  | CROMOLYN                       |           | TdgClinicalTrial TEND                  |
| KCNMA1  | KCNMA1  | CHLOROTHIAZIDE                 |           | TEND                                   |
| KLK1    | KLK1    | ECALLANTIDE                    |           | TdgClinicalTrial TEND                  |
| ABCB1   | ABCB1   | DAPTOMYCIN                     |           | PharmGKB                               |
| ABCB1   | ABCB1   | PACLITAXEL                     |           | DTC NCI CIViC                          |
| ABCB1   | ABCB1   | AGOMELATINE                    |           | PharmGKB                               |
| ABCB1   | ABCB1   | NICARDIPINE                    |           | PharmGKB                               |
| ABCB1   | ABCB1   | DEXTROMETHORPHAN               |           | NCI                                    |
| ABCB1   | ABCB1   | VINBLASTINE                    |           | DTC                                    |
| ABCB1   | ABCB1   | 2'-HYDROXYCHALCONE             |           | DTC                                    |
| ABCB1   | ABCB1   | RANOLAZINE                     |           | PharmGKB                               |
| ABCB1   | ABCB1   | SPIRONOLACTONE                 |           | NCI PharmGKB                           |
| ABCB1   | ABCB1   | TESMILIFENE                    | inducer   | TdgClinicalTrial                       |
| ABCB1   | ABCB1   | PROPRANOLOL                    |           | NCI PharmGKB                           |
| ABCB1   | ABCB1   | HETEROCODEINE                  |           | DTC                                    |
| ABCB1   | ABCB1   | RISPERIDONE                    |           | PharmGKB                               |
| ABCB1   | ABCB1   | DENDROAMIDE A                  |           | DTC                                    |
| ABCB1   | ABCB1   | GABAPENTIN                     |           | NCI                                    |
| ABCB1   | ABCB1   | REMIFENTANIL                   |           | PharmGKB                               |
| ABCB1   | ABCB1   | QUININE                        |           | PharmGKB                               |
| ABCB1   | ABCB1   | ERLOTINIB                      |           | PharmGKB                               |
| ABCB1   | ABCB1   | BIRICODAR                      |           | PharmGKB TTD                           |
| ABCB1   | ABCB1   | NORTRIPTYLINE                  |           | PharmGKB                               |
| ABCB1   | ABCB1   | CHEMBL270688                   |           | DTC                                    |
| ABCB1   | ABCB1   | METHYLPREDNISOLONE             |           | PharmGKB                               |
| ABCB1   | ABCB1   | GRANISETRON                    |           | PharmGKB                               |
| ABCB1   | ABCB1   | VORICONAZOLE                   |           | PharmGKB                               |
| ABCB1   | ABCB1   | RITONAVIR                      |           | DTC PharmGKB                           |
| ABCB1   | ABCB1   | MIDAZOLAM                      |           | PharmGKB                               |
| ABCB1   | ABCB1   | VALINOMYCIN                    |           | PharmGKB                               |
| ABCB1   | ABCB1   | PREDNISOLONE                   |           | PharmGKB                               |
| ABCB1   | ABCB1   | RESERPINE                      |           | DTC PharmGKB                           |
| ABCB1   | ABCB1   | MORPHINE                       |           | DTC PharmGKB                           |
| ABCB1   | ABCB1   | DELAVIRDINE                    |           | DTC                                    |
| ABCB1   | ABCB1   | ALISKIREN                      |           | PharmGKB                               |
| ABCB1   | ABCB1   | AMIODARONE                     |           | PharmGKB                               |
| ABCB1   | ABCB1   | CELIPROLOL                     |           | PharmGKB                               |
| ABCB1   | ABCB1   | OXYCODONE                      |           | PharmGKB                               |
| ABCB1   | ABCB1   | PENTAZOCINE                    |           | PharmGKB                               |
| ABCB1   | ABCB1   | ITRACONAZOLE                   |           | NCI PharmGKB                           |
| ABCB1   | ABCB1   | FLUVASTATIN                    |           | PharmGKB                               |
| ABCB1   | ABCB1   | 7-ETHYL-10-HYDROXYCAMPTOTHECIN |           | PharmGKB                               |

|       |       |                          |           |                                                  |
|-------|-------|--------------------------|-----------|--------------------------------------------------|
| ABCB1 | ABCB1 | NIFEDIPINE               | inhibitor | NCI                                              |
| ABCB1 | ABCB1 | BLEOMYCIN                |           | PharmGKB                                         |
| ABCB1 | ABCB1 | MODAFINIL                |           | PharmGKB                                         |
| ABCB1 | ABCB1 | DIGOXIN                  |           | NCI                                              |
| ABCB1 | ABCB1 | MURUCOIDIN V             |           | DTC                                              |
| ABCB1 | ABCB1 | ONDANSETRON              |           | PharmGKB                                         |
| ABCB1 | ABCB1 | PREDNISONE               |           | PharmGKB                                         |
| ABCB1 | ABCB1 | PURGIN II                |           | DTC                                              |
| ABCB1 | ABCB1 | RITUXIMAB                |           | NCI PharmGKB                                     |
| ABCB1 | ABCB1 | CHEMBL217425             |           | DTC                                              |
| ABCB1 | ABCB1 | IDARUBICIN               |           | PharmGKB                                         |
| ABCB1 | ABCB1 | TENIPOSIDE               |           | PharmGKB                                         |
| ABCB1 | ABCB1 | PRAVASTATIN              |           | NCI PharmGKB                                     |
| ABCB1 | ABCB1 | CYCLOSPORINE             |           | DTC NCI PharmGKB                                 |
| ABCB1 | ABCB1 | NEFAZODONE               |           | PharmGKB                                         |
| ABCB1 | ABCB1 | NELFINAVIR               |           | DTC PharmGKB                                     |
| ABCB1 | ABCB1 | TARIQUIDAR               |           | DTC TdgClinicalTrial ChemblInteractions PharmGKB |
| ABCB1 | ABCB1 | COLCHICINE               |           | TEND PharmGKB                                    |
| ABCB1 | ABCB1 | PHENOBARBITAL            |           | NCI PharmGKB                                     |
| ABCB1 | ABCB1 | LOPINAVIR                |           | DTC PharmGKB                                     |
| ABCB1 | ABCB1 | IRINOTECAN               |           | PharmGKB                                         |
| ABCB1 | ABCB1 | TANGERETIN               |           | DTC                                              |
| ABCB1 | ABCB1 | TAMOXIFEN                |           | PharmGKB                                         |
| ABCB1 | ABCB1 | METHYLPHENIDATE          |           | PharmGKB                                         |
| ABCB1 | ABCB1 | ADRIAMYCIN               |           | NCI                                              |
| ABCB1 | ABCB1 | PROPAFENONE              |           | PharmGKB                                         |
| ABCB1 | ABCB1 | TETRACYCLINE             |           | PharmGKB                                         |
| ABCB1 | ABCB1 | DOXYCYCLINE              |           | NCI PharmGKB                                     |
| ABCB1 | ABCB1 | PROPOFOL                 |           | PharmGKB                                         |
| ABCB1 | ABCB1 | CARBOPLATIN              |           | NCI                                              |
| ABCB1 | ABCB1 | EPIRUBICIN               |           | NCI                                              |
| ABCB1 | ABCB1 | LAMIVUDINE               |           | PharmGKB                                         |
| ABCB1 | ABCB1 | CURCUMIN                 |           | NCI PharmGKB                                     |
| ABCB1 | ABCB1 | FEXOFENADINE             |           | PharmGKB                                         |
| ABCB1 | ABCB1 | PROGESTERONE             |           | PharmGKB                                         |
| ABCB1 | ABCB1 | DEFEROXAMINE             |           | NCI                                              |
| ABCB1 | ABCB1 | PAROXETINE               |           | PharmGKB                                         |
| ABCB1 | ABCB1 | FLAVOKAWAIN A            |           | DTC                                              |
| ABCB1 | ABCB1 | CYTARABINE               |           | PharmGKB                                         |
| ABCB1 | ABCB1 | BISANTRENE               |           | NCI                                              |
| ABCB1 | ABCB1 | BROMPERIDOL              |           | PharmGKB                                         |
| ABCB1 | ABCB1 | CHEMBL595816             |           | DTC                                              |
| ABCB1 | ABCB1 | VALGANCICLOVIR           |           | PharmGKB                                         |
| ABCB1 | ABCB1 | MAPROTILINE              |           | PharmGKB                                         |
| ABCB1 | ABCB1 | QUERCETIN-3'-O-PHOSPHATE |           | TdgClinicalTrial                                 |
| ABCB1 | ABCB1 | RIFAMPIN                 |           | PharmGKB                                         |
| ABCB1 | ABCB1 | TAXOL C                  |           | DTC                                              |
| ABCB1 | ABCB1 | LANSOPRAZOLE             |           | PharmGKB                                         |
| ABCB1 | ABCB1 | AMITRIPTYLINE            |           | PharmGKB                                         |
| ABCB1 | ABCB1 | TERFENADINE              |           | NCI PharmGKB                                     |
| ABCB1 | ABCB1 | AMISULPRIDE              |           | PharmGKB                                         |
| ABCB1 | ABCB1 | FLUOROURACIL             |           | NCI                                              |
| ABCB1 | ABCB1 | CLOPIDOGREL              |           | PharmGKB                                         |
| ABCB1 | ABCB1 | SIMEPREVIR               |           | PharmGKB                                         |
| ABCB1 | ABCB1 | CAMPTOTHECIN             |           | NCI                                              |
| ABCB1 | ABCB1 | CARVEDILOL               |           | PharmGKB                                         |
| ABCB1 | ABCB1 | CIMETIDINE               |           | PharmGKB                                         |
| ABCB1 | ABCB1 | FENOFIBRATE              |           | NCI                                              |
| ABCB1 | ABCB1 | LOPERAMIDE               |           | PharmGKB                                         |
| ABCB1 | ABCB1 | ETOPOSIDE                |           | PharmGKB                                         |
| ABCB1 | ABCB1 | RANITIDINE               |           | NCI PharmGKB                                     |

|       |       |                |           |                           |
|-------|-------|----------------|-----------|---------------------------|
| ABCB1 | ABCB1 | FLUPHENAZINE   |           | PharmGKB                  |
| ABCB1 | ABCB1 | QUINIDINE      |           | NCI PharmGKB              |
| ABCB1 | ABCB1 | LEVETIRACETAM  |           | PharmGKB                  |
| ABCB1 | ABCB1 | DEXRAZOXANE    |           | PharmGKB                  |
| ABCB1 | ABCB1 | BEPRIDIL       |           | PharmGKB                  |
| ABCB1 | ABCB1 | FELODIPINE     |           | PharmGKB                  |
| ABCB1 | ABCB1 | METHADONE      |           | NCI                       |
| ABCB1 | ABCB1 | PERVILLEINE B  |           | DTC                       |
| ABCB1 | ABCB1 | TETRABENAZINE  |           | PharmGKB                  |
| ABCB1 | ABCB1 | VOACAMINE      | inhibitor | DTC                       |
| ABCB1 | ABCB1 | ALDOSTERONE    |           | PharmGKB                  |
| ABCB1 | ABCB1 | KETOCONAZOLE   |           | PharmGKB                  |
| ABCB1 | ABCB1 | CLOMIPRAMINE   |           | PharmGKB                  |
| ABCB1 | ABCB1 | NEVIRAPINE     |           | DTC PharmGKB              |
| ABCB1 | ABCB1 | MITOMYCIN      |           | PharmGKB                  |
| ABCB1 | ABCB1 | LITHIUM        |           | PharmGKB                  |
| ABCB1 | ABCB1 | BROMOCRIPTINE  |           | NCI                       |
| ABCB1 | ABCB1 | GEFITINIB      |           | NCI PharmGKB              |
| ABCB1 | ABCB1 | E-FLUPENTIXOL  |           | PharmGKB                  |
| ABCB1 | ABCB1 | CHEMBL410907   |           | DTC                       |
| ABCB1 | ABCB1 | NITRENDIPINE   |           | PharmGKB                  |
| ABCB1 | ABCB1 | DOCETAXEL      |           | PharmGKB                  |
| ABCB1 | ABCB1 | SIROLIMUS      |           | NCI PharmGKB              |
| ABCB1 | ABCB1 | RUCAPARIB      |           | PharmGKB                  |
| ABCB1 | ABCB1 | ELACRIDAR      |           | PharmGKB                  |
| ABCB1 | ABCB1 | MEFLOQUINE     |           | PharmGKB                  |
| ABCB1 | ABCB1 | CLARITHROMYCIN |           | NCI PharmGKB              |
| ABCB1 | ABCB1 | ZIDOVUDINE     |           | NCI PharmGKB              |
| ABCB1 | ABCB1 | DOMPERIDONE    |           | NCI PharmGKB              |
| ABCB1 | ABCB1 | ATAZANAVIR     |           | NCI                       |
| ABCB1 | ABCB1 | HYDROCORTISONE |           | NCI PharmGKB              |
| ABCB1 | ABCB1 | IMATINIB       |           | NCI                       |
| ABCB1 | ABCB1 | LOVASTATIN     |           | NCI PharmGKB              |
| ABCB1 | ABCB1 | TEMOZOLOMIDE   |           | PharmGKB                  |
| ABCB1 | ABCB1 | DOXORUBICIN    |           | NCI PharmGKB              |
| ABCB1 | ABCB1 | AUSTOCYSTIN D  |           | DTC                       |
| ABCB1 | ABCB1 | PERVILLEINE C  |           | DTC                       |
| ABCB1 | ABCB1 | TRIMETREXATE   |           | NCI                       |
| ABCB1 | ABCB1 | SORAFENIB      |           | PharmGKB                  |
| ABCB1 | ABCB1 | IBUPROFEN      |           | NCI                       |
| ABCB1 | ABCB1 | BOCEPREVIR     |           | PharmGKB                  |
| ABCB1 | ABCB1 | ERYTHROMYCIN   |           | PharmGKB                  |
| ABCB1 | ABCB1 | SUFENTANIL     |           | PharmGKB                  |
| ABCB1 | ABCB1 | SILIBININ      |           | PharmGKB                  |
| ABCB1 | ABCB1 | VINCRISTINE    |           | PharmGKB                  |
| ABCB1 | ABCB1 | IVERMECTIN     |           | PharmGKB                  |
| ABCB1 | ABCB1 | CHEMBL444075   |           | DTC                       |
| ABCB1 | ABCB1 | PANTOPRAZOLE   |           | PharmGKB                  |
| ABCB1 | ABCB1 | CHEMBL408422   |           | DTC                       |
| ABCB1 | ABCB1 | TIPIFARNIB     |           | PharmGKB                  |
| ABCB1 | ABCB1 | ZOSUQUIDAR     | inhibitor | TdgClinicalTrial PharmGKB |
| ABCB1 | ABCB1 | VERAPAMIL      |           | DTC NCI                   |
| ABCB1 | ABCB1 | PERVILLEINE F  |           | DTC                       |
| ABCB1 | ABCB1 | SPARFLOXACIN   |           | PharmGKB                  |
| ABCB1 | ABCB1 | PHENOTHIAZINE  |           | NCI                       |
| ABCB1 | ABCB1 | INDINAVIR      |           | PharmGKB                  |
| ABCB1 | ABCB1 | FENTANYL       |           | PharmGKB                  |
| ABCB1 | ABCB1 | CITALOPRAM     |           | PharmGKB                  |
| ABCB1 | ABCB1 | RIVAROXABAN    |           | PharmGKB                  |
| ABCB1 | ABCB1 | NICOTINE       |           | NCI                       |
| ABCB1 | ABCB1 | DABIGATRAN     |           | PharmGKB                  |

|       |       |                         |              |
|-------|-------|-------------------------|--------------|
| ABCB1 | ABCB1 | MILTEFOSINE             | NCI          |
| ABCB1 | ABCB1 | FILGRASTIM              | NCI          |
| ABCB1 | ABCB1 | ANASTROZOLE             | PharmGKB     |
| ABCB1 | ABCB1 | CHEMBL203365            | DTC          |
| ABCB1 | ABCB1 | EFAVIRENZ               | DTC PharmGKB |
| ABCB1 | ABCB1 | LAMOTRIGINE             | PharmGKB     |
| ABCB1 | ABCB1 | AMPRENAVIR              | PharmGKB     |
| ABCB1 | ABCB1 | WARFARIN                | PharmGKB     |
| ABCB1 | ABCB1 | DAUNORUBICIN            | NCI PharmGKB |
| ABCB1 | ABCB1 | LENALIDOMIDE            | PharmGKB     |
| ABCB1 | ABCB1 | VECURONIUM              | PharmGKB     |
| ABCB1 | ABCB1 | CODEINE                 | DTC PharmGKB |
| ABCB1 | ABCB1 | ASTEMIZOLE              | PharmGKB     |
| ABCB1 | ABCB1 | CYANOCOBALAMIN          | PharmGKB     |
| ABCB1 | ABCB1 | ARIPRAZOLE              | PharmGKB     |
| ABCB1 | ABCB1 | SIMVASTATIN             | NCI PharmGKB |
| ABCB1 | ABCB1 | OMEPRAZOLE              | PharmGKB     |
| ABCB1 | ABCB1 | DISULFIRAM              | PharmGKB     |
| ABCB1 | ABCB1 | VALSPODAR               | PharmGKB     |
| ABCB1 | ABCB1 | MILTIRONE               | DTC          |
| ABCB1 | ABCB1 | HALOPERIDOL             | PharmGKB     |
| ABCB1 | ABCB1 | SEVOFLURANE             | PharmGKB     |
| ABCB1 | ABCB1 | DRONABINOL              | NCI          |
| ABCB1 | ABCB1 | DESIPRAMINE             | PharmGKB     |
| ABCB1 | ABCB1 | CHEMBL306786            | DTC          |
| ABCB1 | ABCB1 | SCUTELLARIN             | DTC          |
| ABCB1 | ABCB1 | LEVOFLOXACIN            | PharmGKB     |
| ABCB1 | ABCB1 | ETRAVIRINE              | DTC          |
| ABCB1 | ABCB1 | ATORVASTATIN            | NCI PharmGKB |
| ABCB1 | ABCB1 | VENLAFAXINE             | PharmGKB     |
| ABCB1 | ABCB1 | MITOXANTRONE            | PharmGKB     |
| ABCB1 | ABCB1 | ACENOCOUMAROL           | PharmGKB     |
| ABCB1 | ABCB1 | TALINOLOL               | PharmGKB     |
| ABCB1 | ABCB1 | ATENOLOL                | PharmGKB     |
| ABCB1 | ABCB1 | CAPECITABINE            | PharmGKB     |
| ABCB1 | ABCB1 | LONAFARNIB              | NCI          |
| ABCB1 | ABCB1 | FLUVOXAMINE             | PharmGKB     |
| ABCB1 | ABCB1 | ISONIAZID               | PharmGKB     |
| ABCB1 | ABCB1 | DILTIAZEM               | PharmGKB     |
| ABCB1 | ABCB1 | DIPYRIDAMOLE            | PharmGKB     |
| ABCB1 | ABCB1 | OXCARBAZEPINE           | PharmGKB     |
| ABCB1 | ABCB1 | TEMSIROLIMUS            | PharmGKB     |
| ABCB1 | ABCB1 | GEMTUZUMAB OZOGAMICIN   | NCI          |
| ABCB1 | ABCB1 | BRECANAVIR              | DTC          |
| ABCB1 | ABCB1 | CHLORPROMAZINE          | NCI PharmGKB |
| ABCB1 | ABCB1 | EPOTHILONE D            | DTC          |
| ABCB1 | ABCB1 | VEMURAFENIB             | PharmGKB     |
| ABCB1 | ABCB1 | MELPHALAN               | PharmGKB     |
| ABCB1 | ABCB1 | NIMODIPINE              | NCI          |
| ABCB1 | ABCB1 | 2',4'-DIHYDROXYCHALCONE | DTC          |
| ABCB1 | ABCB1 | SUNITINIB               | PharmGKB     |
| ABCB1 | ABCB1 | FLUOXETINE              | PharmGKB     |
| ABCB1 | ABCB1 | EVEROLIMUS              | PharmGKB     |
| ABCB1 | ABCB1 | METOCHALCONE            | DTC          |
| ABCB1 | ABCB1 | TRABECTEDIN             | PharmGKB     |
| ABCB1 | ABCB1 | MICONAZOLE              | NCI          |
| ABCB1 | ABCB1 | 3,4-DIHYDROXYXANTHONE   | DTC          |
| ABCB1 | ABCB1 | PROBENECID              | NCI          |
| ABCB1 | ABCB1 | SAQUINAVIR              | PharmGKB     |
| ABCB1 | ABCB1 | MIFEPRISTONE            | PharmGKB     |
| ABCB1 | ABCB1 | VINDESINE               | PharmGKB     |



|        |        |                    |                  |
|--------|--------|--------------------|------------------|
| ABCB1  | ABCB1  | CLOZAPINE          | PharmGKB         |
| ABCB1  | ABCB1  | ROCURONIUM         | PharmGKB         |
| ABCB1  | ABCB1  | SERTRALINE         | PharmGKB         |
| ABCB1  | ABCB1  | LOSARTAN           | PharmGKB         |
| ABCB1  | ABCB1  | OLANZAPINE         | PharmGKB         |
| ABCB1  | ABCB1  | TOPOTECAN          | PharmGKB         |
| ABCB1  | ABCB1  | HYDROXOCOBALAMIN   | PharmGKB         |
| ABCB1  | ABCB1  | CHEMBL533293       | DTC              |
| ABCB1  | ABCB1  | GARLIC             | NCI              |
| ABCB1  | ABCB1  | DEXAMETHASONE      | PharmGKB         |
| ABCB1  | ABCB1  | CISPLATIN          | PharmGKB         |
| ABCB1  | ABCB1  | CAPSAICIN          | NCI              |
| ABCB1  | ABCB1  | PERVILLEINE D      | DTC              |
| ABCB1  | ABCB1  | DICLOXACILLIN      | PharmGKB         |
| ABCB1  | ABCB1  | BAFETINIB          | CIViC            |
| ABCB1  | ABCB1  | CERITINIB          | CIViC            |
| ABCB1  | ABCB1  | CRIZOTINIB         | CIViC            |
| CP     | CP     | DEXRAZOXANE        | NCI              |
| CP     | CP     | AMPICILLIN         | NCI              |
| CP     | CP     | PENICILLAMINE      | NCI              |
| CP     | CP     | PROGESTERONE       | NCI              |
| CP     | CP     | VINCRIStINE        | NCI              |
| CP     | CP     | HYDROXYUREA        | NCI              |
| CP     | CP     | NICOTINE           | NCI              |
| CP     | CP     | ESTRADIOL          | NCI              |
| CP     | CP     | ISOFLAVONE         | NCI              |
| CP     | CP     | ISOPROTERENOL      | NCI              |
| CP     | CP     | DIETHYLSTILBESTROL | NCI              |
| CP     | CP     | DANAZOL            | NCI              |
| CP     | CP     | ANAKINRA           | NCI              |
| CP     | CP     | PROTOPORPHYRIN     | NCI              |
| CYP3A5 | CYP3A5 | HALOPERIDOL        | PharmGKB         |
| CYP3A5 | CYP3A5 | TESMILIFENE        | TdgClinicalTrial |
| CYP3A5 | CYP3A5 | DIAZEPAM           | PharmGKB         |
| CYP3A5 | CYP3A5 | ROSUVASTATIN       | PharmGKB         |
| CYP3A5 | CYP3A5 | TRAMADOL           | PharmGKB         |
| CYP3A5 | CYP3A5 | BUPRENORPHINE      | PharmGKB         |
| CYP3A5 | CYP3A5 | CILOSTAZOL         | PharmGKB         |
| CYP3A5 | CYP3A5 | APIXABAN           | PharmGKB         |
| CYP3A5 | CYP3A5 | MEPERIDINE         | PharmGKB         |
| CYP3A5 | CYP3A5 | CLARITHROMYCIN     | PharmGKB         |
| CYP3A5 | CYP3A5 | AMLODIPINE         | PharmGKB         |
| CYP3A5 | CYP3A5 | GEFITINIB          | NCI              |
| CYP3A5 | CYP3A5 | MODAFINIL          | PharmGKB         |
| CYP3A5 | CYP3A5 | ZIPRASIDONE        | PharmGKB         |
| CYP3A5 | CYP3A5 | HYDROXYZINE        | PharmGKB         |
| CYP3A5 | CYP3A5 | CITALOPRAM         | PharmGKB         |
| CYP3A5 | CYP3A5 | LAPATINIB          | DTC              |
| CYP3A5 | CYP3A5 | QUETIAPINE         | PharmGKB         |
| CYP3A5 | CYP3A5 | DOCETAXEL          | PharmGKB         |
| CYP3A5 | CYP3A5 | LORATADINE         | PharmGKB         |
| CYP3A5 | CYP3A5 | SIMVASTATIN        | NCI PharmGKB     |
| CYP3A5 | CYP3A5 | SUFENTANIL         | PharmGKB         |
| CYP3A5 | CYP3A5 | CHLORPHENIRAMINE   | PharmGKB         |
| CYP3A5 | CYP3A5 | CYCLOSPORINE       | NCI              |
| CYP3A5 | CYP3A5 | OLANZAPINE         | PharmGKB         |
| CYP3A5 | CYP3A5 | ATROPINE           | NCI              |
| CYP3A5 | CYP3A5 | SIBUTRAMINE        | PharmGKB         |
| CYP3A5 | CYP3A5 | PREDNISOLONE       | NCI              |
| CYP3A5 | CYP3A5 | TRETINOIN          | PharmGKB         |
| CYP3A5 | CYP3A5 | TRAZODONE          | PharmGKB         |

|        |        |                             |           |                              |
|--------|--------|-----------------------------|-----------|------------------------------|
| CYP3A5 | CYP3A5 | ISOPROPYL ALCOHOL           |           | NCI                          |
| CYP3A5 | CYP3A5 | ESZOPICLONE                 |           | PharmGKB                     |
| CYP3A5 | CYP3A5 | VINCRIStINE                 |           | PharmGKB                     |
| CYP3A5 | CYP3A5 | ALPRAZOLAM                  |           | PharmGKB                     |
| CYP3A5 | CYP3A5 | HYDROCODONE                 |           | PharmGKB                     |
| CYP3A5 | CYP3A5 | BUSPIRONE                   |           | PharmGKB                     |
| CYP3A5 | CYP3A5 | MONTELUKAST                 |           | PharmGKB                     |
| CYP3A5 | CYP3A5 | OMEPRazole                  |           | PharmGKB                     |
| CYP3A5 | CYP3A5 | ESOMEPRazole                |           | PharmGKB                     |
| CYP3A5 | CYP3A5 | PIOGLITAZONE                |           | PharmGKB                     |
| CYP3A5 | CYP3A5 | ONDANSETRON                 |           | PharmGKB                     |
| CYP3A5 | CYP3A5 | RITONAVIR                   | inhibitor | GuideToPharmacology PharmGKB |
| CYP3A5 | CYP3A5 | PROPOXYPHENE                |           | PharmGKB                     |
| CYP3A5 | CYP3A5 | MEDROXYPROGESTERONE ACETATE |           | PharmGKB                     |
| CYP3A5 | CYP3A5 | BOCEPREVIR                  |           | PharmGKB                     |
| CYP3A5 | CYP3A5 | NIFEDIPINE                  |           | PharmGKB                     |
| CYP3A5 | CYP3A5 | MIRTAZAPINE                 |           | PharmGKB                     |
| CYP3A5 | CYP3A5 | MELOXICAM                   |           | PharmGKB                     |
| CYP3A5 | CYP3A5 | AMIODARONE                  |           | PharmGKB                     |
| CYP3A5 | CYP3A5 | PAROXETINE                  |           | PharmGKB                     |
| CYP3A5 | CYP3A5 | PRASUGREL                   |           | PharmGKB FDA                 |
| CYP3A5 | CYP3A5 | SERTRALINE                  |           | PharmGKB                     |
| CYP3A5 | CYP3A5 | TERAZOSIN                   |           | PharmGKB                     |
| CYP3A5 | CYP3A5 | NEVIRAPINE                  |           | PharmGKB                     |
| CYP3A5 | CYP3A5 | ISOTRETINOIN                |           | PharmGKB                     |
| CYP3A5 | CYP3A5 | PANTOPRAZOLE                |           | PharmGKB                     |
| CYP3A5 | CYP3A5 | PACLITAXEL                  |           | NCI PharmGKB                 |
| CYP3A5 | CYP3A5 | ZOLPIDEM                    |           | PharmGKB                     |
| CYP3A5 | CYP3A5 | ATORVASTATIN                |           | PharmGKB                     |
| CYP3A5 | CYP3A5 | CARBAMAZEPINE               |           | NCI PharmGKB                 |
| CYP3A5 | CYP3A5 | PHENYTOIN                   |           | NCI                          |
| CYP3A5 | CYP3A5 | ARTEMETHER                  |           | PharmGKB                     |
| CYP3A5 | CYP3A5 | RIFAMPIN                    |           | DTC PharmGKB                 |
| CYP3A5 | CYP3A5 | GRANISETRON                 |           | PharmGKB                     |
| CYP3A5 | CYP3A5 | LOVASTATIN                  |           | PharmGKB                     |
| CYP3A5 | CYP3A5 | MIDAZOLAM                   |           | PharmGKB                     |
| CYP3A5 | CYP3A5 | FLUOXETINE                  |           | PharmGKB                     |
| CYP3A5 | CYP3A5 | DOLUTEGRAVIR                |           | PharmGKB                     |
| CYP3A5 | CYP3A5 | CLOPIDOGREL                 |           | DTC PharmGKB                 |
| CYP3A5 | CYP3A5 | CLINDAMYCIN                 |           | PharmGKB                     |
| CYP3A5 | CYP3A5 | AMPRENAVIR                  |           | NCI                          |
| CYP3A5 | CYP3A5 | DABIGATRAN                  |           | PharmGKB                     |
| CYP3A5 | CYP3A5 | EFAVIRENZ                   |           | PharmGKB                     |
| CYP3A5 | CYP3A5 | DONEPEZIL                   |           | PharmGKB                     |
| CYP3A5 | CYP3A5 | CARBOPLATIN                 |           | PharmGKB                     |
| CYP3A5 | CYP3A5 | TAMSULOSIN                  |           | PharmGKB                     |
| CYP3A5 | CYP3A5 | CELECOXIB                   |           | PharmGKB                     |
| CYP3A5 | CYP3A5 | TADALAFIL                   |           | PharmGKB                     |
| CYP3A5 | CYP3A5 | LOSARTAN                    |           | PharmGKB                     |
| CYP3A5 | CYP3A5 | AXITINIB                    |           | PharmGKB                     |
| CYP3A5 | CYP3A5 | NIMODIPINE                  |           | PharmGKB                     |
| CYP3A5 | CYP3A5 | SIROLIMUS                   |           | PharmGKB                     |
| CYP3A5 | CYP3A5 | FENTANYL                    |           | PharmGKB                     |
| CYP3A5 | CYP3A5 | CYCLOBENZAPRINE             |           | PharmGKB                     |
| CYP3A5 | CYP3A5 | FENOFIBRATE                 |           | PharmGKB                     |
| CYP3A5 | CYP3A5 | EVEROLIMUS                  |           | PharmGKB                     |
| CYP3A5 | CYP3A5 | HYDROMORPHONE               |           | PharmGKB                     |
| CYP3A5 | CYP3A5 | LUMEFANTRINE                |           | PharmGKB                     |
| CYP3A5 | CYP3A5 | PROGESTERONE                |           | PharmGKB                     |
| CYP3A5 | CYP3A5 | OXYCODONE                   |           | PharmGKB                     |
| CYP3A5 | CYP3A5 | VARDENAFIL                  |           | PharmGKB                     |

|        |        |                     |           |                             |
|--------|--------|---------------------|-----------|-----------------------------|
| CYP3A5 | CYP3A5 | LANSOPRAZOLE        | inhibitor | PharmGKB                    |
| CYP3A5 | CYP3A5 | SUNITINIB           |           | PharmGKB                    |
| CYP3A5 | CYP3A5 | LOPINAVIR           |           | PharmGKB                    |
| CYP3A5 | CYP3A5 | COBICISTAT          |           | ChEMBLInteractions          |
| CYP3A5 | CYP3A5 | ERYTHROMYCIN        |           | PharmGKB                    |
| CYP3A5 | CYP3A5 | VENLAFAXINE         |           | PharmGKB                    |
| CYP3A5 | CYP3A5 | FLUVASTATIN         |           | PharmGKB                    |
| CYP3A5 | CYP3A5 | SALMETEROL          |           | PharmGKB                    |
| CYP3A5 | CYP3A5 | TRIAZOLAM           |           | PharmGKB                    |
| CYP3A5 | CYP3A5 | IMATINIB            |           | PharmGKB                    |
| CYP3A5 | CYP3A5 | WARFARIN            |           | PharmGKB                    |
| CYP3A5 | CYP3A5 | SILDENAFIL          |           | PharmGKB                    |
| MYC    | MYC    | GLUTAMINE           |           | NCI                         |
| MYC    | MYC    | AN-9                |           | NCI                         |
| MYC    | MYC    | PROTOPORPHYRIN      |           | NCI                         |
| MYC    | MYC    | HYPOXANTHINE        |           | NCI                         |
| MYC    | MYC    | ADOZELESIN          |           | NCI                         |
| MYC    | MYC    | CISPLATIN           |           | CIViC                       |
| MYC    | MYC    | MITOGUAZONE         |           | NCI                         |
| MYC    | MYC    | ALISERTIB           |           | ClarityFoundationBiomarkers |
| MYC    | MYC    | OLAPARIB            |           | CIViC                       |
| MYC    | MYC    | BROMOCRIPTINE       |           | NCI                         |
| MYC    | MYC    | CHEMBL35482         |           | NCI                         |
| MYC    | MYC    | ANTIBIOTIC          |           | NCI                         |
| MYC    | MYC    | CETUXIMAB           |           | NCI                         |
| MYC    | MYC    | THIOGUANINE         |           | NCI                         |
| MYC    | MYC    | INDOMETHACIN        | inhibitor | NCI                         |
| MYC    | MYC    | DIETHYLSTILBESTROL  |           | NCI                         |
| MYC    | MYC    | AZACITIDINE         |           | NCI                         |
| MYC    | MYC    | IMATINIB            |           | NCI                         |
| MYC    | MYC    | VORINOSTAT          |           | NCI                         |
| MYC    | MYC    | DINACICLIB          |           | ClarityFoundationBiomarkers |
| MYC    | MYC    | TEMOZOLOMIDE        |           | CGI                         |
| MYC    | MYC    | QUINAPRIL           |           | NCI                         |
| MYC    | MYC    | PREXASERTIB         |           | CIViC                       |
| MYC    | MYC    | ACIVICIN            |           | NCI                         |
| MYC    | MYC    | TROGLITAZONE        |           | NCI                         |
| MYC    | MYC    | LITHIUM             |           | NCI                         |
| MYC    | MYC    | AMINOPTERIN         |           | NCI                         |
| MYC    | MYC    | AMG-900             |           | ClarityFoundationBiomarkers |
| MYC    | MYC    | MELATONIN           |           | NCI                         |
| MYC    | MYC    | THROMBIN            |           | NCI                         |
| MYC    | MYC    | AMIFOSTINE          |           | NCI                         |
| MYC    | MYC    | ESTRONE             |           | NCI                         |
| MYC    | MYC    | METHYLPREDNISOLONE  |           | NCI                         |
| MYC    | MYC    | CALCITRIOL          |           | NCI                         |
| MYC    | MYC    | NOVOBIOCIN          |           | NCI                         |
| MYC    | MYC    | VERAPAMIL           |           | NCI                         |
| MYC    | MYC    | THYROTROPIN         |           | NCI                         |
| MYC    | MYC    | LOBAPLATIN          |           | NCI                         |
| MYC    | MYC    | SULINDAC            |           | NCI                         |
| MYC    | MYC    | BIZELESIN           |           | NCI                         |
| MYC    | MYC    | IBRUTINIB           |           | CIViC                       |
| MT1F   | MT1F   | DEXAMETHASONE       | inhibitor | NCI                         |
| MT1F   | MT1F   | CISPLATIN           |           | NCI                         |
| DAO    | DAO    | CHEMBL492591        |           | DTC                         |
| DAO    | DAO    | 3-HYDROXYCOUMARIN   |           | DTC                         |
| DAO    | DAO    | BENZOIC ACID        |           | DTC                         |
| DAO    | DAO    | CHEMBL164585        |           | DTC                         |
| GUCA2B | GUCA2B | VOLANESORSEN SODIUM |           | NCI                         |
| TPSAB1 | TPSAB1 | GABEXATE            |           | GuideToPharmacology         |

|         |         |                                      |                                  |  |                                                                                                                |
|---------|---------|--------------------------------------|----------------------------------|--|----------------------------------------------------------------------------------------------------------------|
| TPSAB1  | TPSAB1  | PENTAMIDINE                          |                                  |  | TTD                                                                                                            |
| TPSAB1  | TPSAB1  | CHEMBL256892                         | inhibitor                        |  | GuideToPharmacology                                                                                            |
| TPSAB1  | TPSAB1  | THROMBIN                             |                                  |  | NCI                                                                                                            |
| TPSAB1  | TPSAB1  | NAFAMOSTAT                           | inhibitor                        |  | GuideToPharmacology                                                                                            |
| TPSAB1  | TPSAB1  | REGRAMOSTIM                          |                                  |  | NCI                                                                                                            |
| COL1A1  | COL1A1  | COLLAGENASE CLOSTRIDIUM HISTOLYTICUM |                                  |  | ChemblInteractions TEND                                                                                        |
| COL1A1  | COL1A1  | OCRIPLASMIN                          |                                  |  | ChemblInteractions                                                                                             |
| CDH1    | CDH1    | VOLASERTIB                           |                                  |  | JAX-CKB                                                                                                        |
| CDH1    | CDH1    | ERLOTINIB                            |                                  |  | JAX-CKB                                                                                                        |
| CDH1    | CDH1    | SELUMETINIB                          |                                  |  | JAX-CKB                                                                                                        |
| CDH1    | CDH1    | BICALUTAMIDE                         |                                  |  | CGI                                                                                                            |
| CDH1    | CDH1    | CAPECITABINE                         |                                  |  | JAX-CKB                                                                                                        |
| CDH1    | CDH1    | LAPATINIB                            |                                  |  | JAX-CKB                                                                                                        |
| ANGPTL3 | ANGPTL3 | VUPANORSEN                           |                                  |  | TTD                                                                                                            |
| ANGPTL3 | ANGPTL3 | EVINACUMAB                           |                                  |  | TTD                                                                                                            |
| GPR183  | GPR183  | CHEMBL169046                         | agonist                          |  | GuideToPharmacology                                                                                            |
| ST14    | ST14    | SURAMIN                              |                                  |  | NCI                                                                                                            |
| KIT     | KIT     | OSI-930                              | inhibitor                        |  | ChemblInteractions GuideToPharmacology TTD                                                                     |
| KIT     | KIT     | SORAFENIB                            | antagonist inhibitor             |  | TALC MyCancerGenome TdgClinicalTrial JAX-CKB CGI TEND DoCM CIViC GuideToPharmacology PharmGKB TTD OncoKB       |
| KIT     | KIT     | XL-820                               | inhibitor                        |  | ChemblInteractions TTD                                                                                         |
| KIT     | KIT     | TANDUTINIB                           | inhibitor                        |  | DTC MyCancerGenome ChemblInteractions GuideToPharmacology                                                      |
| KIT     | KIT     | SITRAVATINIB                         | inhibitor                        |  | GuideToPharmacology                                                                                            |
| KIT     | KIT     | PEXIDARTINIB                         | inhibitor                        |  | MyCancerGenome JAX-CKB ChemblInteractions GuideToPharmacology CancerCommons TTD                                |
| KIT     | KIT     | MIDOSTAURIN                          | antagonist inhibitor             |  | MyCancerGenome JAX-CKB ChemblInteractions CIViC PharmGKB FDA                                                   |
| KIT     | KIT     | CHEMBL406375                         | inhibitor                        |  | GuideToPharmacology                                                                                            |
| KIT     | KIT     | SU-014813                            | inhibitor                        |  | ChemblInteractions GuideToPharmacology                                                                         |
| KIT     | KIT     | MOTESANIB                            | inhibitor                        |  | TALC MyCancerGenome TdgClinicalTrial JAX-CKB ChemblInteractions                                                |
| KIT     | KIT     | ENTRECTINIB                          |                                  |  | DTC                                                                                                            |
| KIT     | KIT     | DASATINIB                            | antagonist inhibitor             |  | TALC TdgClinicalTrial JAX-CKB ChemblInteractions CGI TEND DoCM CIViC CancerCommons MyCancerGenomeClinicalTrial |
| KIT     | KIT     | REGORAFENIB                          | inhibitor                        |  | TALC MyCancerGenome JAX-CKB ChemblInteractions CGI CIViC MyCancerGenomeClinicalTrial TTD OncoKB                |
| KIT     | KIT     | IMATINIB                             | inhibitor antagonist multitarget |  | TALC MyCancerGenome TdgClinicalTrial JAX-CKB CGI TEND DoCM COSMIC CIViC PharmGKB TTD FDA OncoKB                |
| KIT     | KIT     | ENMD-2076                            | inhibitor                        |  | TdgClinicalTrial ChemblInteractions                                                                            |
| KIT     | KIT     | BARASERTIB                           |                                  |  | DTC                                                                                                            |
| KIT     | KIT     | QUIZARTINIB                          | inhibitor                        |  | JAX-CKB ChemblInteractions DoCM GuideToPharmacology                                                            |
| KIT     | KIT     | AKN-028                              | inhibitor                        |  | GuideToPharmacology                                                                                            |
| KIT     | KIT     | SUNITINIB                            | inhibitor                        |  | TALC MyCancerGenome TdgClinicalTrial JAX-CKB CGI TEND DoCM COSMIC CIViC GuideToPharmacology MyCancerGenom      |
| KIT     | KIT     | CENISERTIB                           | inhibitor                        |  | TALC DTC MyCancerGenome                                                                                        |
| KIT     | KIT     | SUNITINIB MALATE                     | inhibitor                        |  | ChemblInteractions                                                                                             |
| KIT     | KIT     | AXITINIB                             | inhibitor                        |  | TALC MyCancerGenome TdgClinicalTrial CancerCommons                                                             |
| KIT     | KIT     | CHEMBL578061                         |                                  |  | DTC                                                                                                            |
| KIT     | KIT     | SEMAXANIB                            | inhibitor                        |  | ChemblInteractions GuideToPharmacology                                                                         |
| KIT     | KIT     | PAZOPANIB HYDROCHLORIDE              | inhibitor                        |  | ChemblInteractions                                                                                             |
| KIT     | KIT     | CEDIRANIB                            | inhibitor                        |  | TALC ChemblInteractions GuideToPharmacology                                                                    |
| KIT     | KIT     | GW843682X                            |                                  |  | DTC                                                                                                            |
| KIT     | KIT     | VATALANIB                            | inhibitor                        |  | TALC DTC TdgClinicalTrial ChemblInteractions                                                                   |
| KIT     | KIT     | AST-487                              | inhibitor                        |  | DTC GuideToPharmacology                                                                                        |
| KIT     | KIT     | MASITINIB                            | inhibitor                        |  | MyCancerGenome TdgClinicalTrial ChemblInteractions GuideToPharmacology CancerCommons MyCancerGenomeClinicalTi  |
| KIT     | KIT     | PAZOPANIB                            | inhibitor                        |  | TALC MyCancerGenome GuideToPharmacology MyCancerGenomeClinicalTrial                                            |
| KIT     | KIT     | ILORASERTIB                          | inhibitor                        |  | DTC GuideToPharmacology                                                                                        |
| KIT     | KIT     | LINIFANIB                            | inhibitor                        |  | TdgClinicalTrial GuideToPharmacology                                                                           |
| KIT     | KIT     | CHEMBL1908396                        | inhibitor                        |  | GuideToPharmacology                                                                                            |
| KIT     | KIT     | CABOZANTINIB                         | inhibitor                        |  | MyCancerGenome JAX-CKB                                                                                         |
| KIT     | KIT     | PD-0325901                           |                                  |  | JAX-CKB                                                                                                        |
| KIT     | KIT     | CHEMBL541400                         |                                  |  | DTC                                                                                                            |
| KIT     | KIT     | TELATINIB                            | inhibitor                        |  | TALC MyCancerGenome ChemblInteractions                                                                         |
| KIT     | KIT     | FLUMATINIB                           | inhibitor                        |  | GuideToPharmacology                                                                                            |
| KIT     | KIT     | CHEMBL1908395                        | inhibitor                        |  | GuideToPharmacology                                                                                            |
| KIT     | KIT     | JNJ-7706621                          |                                  |  | DTC                                                                                                            |
| KIT     | KIT     | NILOTINIB                            | antagonist inhibitor             |  | JAX-CKB CGI COSMIC CIViC CancerCommons MyCancerGenomeClinicalTrial                                             |
| KIT     | KIT     | PONATINIB                            | inhibitor                        |  | DTC JAX-CKB CGI CIViC TTD                                                                                      |
| KIT     | KIT     | CYC-116                              |                                  |  | DTC                                                                                                            |

|         |         |                            |            |                                                                           |
|---------|---------|----------------------------|------------|---------------------------------------------------------------------------|
| KIT     | KIT     | DOVITINIB                  | inhibitor  | DTC ClarityFoundationClinicalTrial ChEMBLInteractions GuideToPharmacology |
| KIT     | KIT     | MK-2206                    |            | JAX-CKB                                                                   |
| KIT     | KIT     | BEVACIZUMAB                |            | JAX-CKB                                                                   |
| KIT     | KIT     | LENVATINIB                 | inhibitor  | TdgClinicalTrial                                                          |
| KIT     | KIT     | RIVOCERANIB                | inhibitor  | GuideToPharmacology                                                       |
| KIT     | KIT     | AVAPRITINIB                | inhibitor  | JAX-CKB GuideToPharmacology TTD OncoKB                                    |
| KIT     | KIT     | FAMITINIB                  | inhibitor  | ChEMBLInteractions GuideToPharmacology TTD                                |
| KIT     | KIT     | TRAMETINIB                 |            | JAX-CKB                                                                   |
| KIT     | KIT     | HENATINIB                  | inhibitor  | GuideToPharmacology                                                       |
| KIT     | KIT     | FORETINIB                  | inhibitor  | ChEMBLInteractions                                                        |
| KIT     | KIT     | PEMBROLIZUMAB              |            | JAX-CKB                                                                   |
| KIT     | KIT     | AMG-191                    |            | TTD                                                                       |
| KIT     | KIT     | IMATINIB MESYLATE          | inhibitor  | ChEMBLInteractions TTD                                                    |
| KIT     | KIT     | ANLOTINIB                  | inhibitor  | ChEMBLInteractions                                                        |
| KIT     | KIT     | XL-999                     | inhibitor  | ChEMBLInteractions                                                        |
| KIT     | KIT     | CYTARABINE                 |            | JAX-CKB                                                                   |
| KIT     | KIT     | LUCITANIB                  | inhibitor  | GuideToPharmacology                                                       |
| KIT     | KIT     | INFIGRATINIB               |            | JAX-CKB                                                                   |
| KIT     | KIT     | CM-082                     | inhibitor  | ChEMBLInteractions                                                        |
| KIT     | KIT     | ROMIPLOSTIM                |            | TTD                                                                       |
| KIT     | KIT     | AMUVATINIB                 | inhibitor  | TALC MyCancerGenome TdgClinicalTrial ChEMBLInteractions                   |
| KIT     | KIT     | SP-600125                  |            | DTC                                                                       |
| KIT     | KIT     | CRENOLANIB                 | inhibitor  | GuideToPharmacology                                                       |
| KIT     | KIT     | RIPRETINIB                 | inhibitor  | JAX-CKB GuideToPharmacology TTD                                           |
| KIT     | KIT     | SNS-314                    |            | DTC                                                                       |
| KIT     | KIT     | EDICOTINIB                 | inhibitor  | GuideToPharmacology                                                       |
| KIT     | KIT     | SORAFENIB TOSYLATE         | inhibitor  | ChEMBLInteractions                                                        |
| KIT     | KIT     | RG-1530                    | inhibitor  | DTC GuideToPharmacology                                                   |
| NECTIN4 | NECTIN4 | ENFORTUMAB VEDOTIN         | antibody   | TALC TdgClinicalTrial TTD                                                 |
| HRH2    | HRH2    | CONESSINE                  | antagonist | GuideToPharmacology                                                       |
| HRH2    | HRH2    | RANITIDINE                 | antagonist | TdgClinicalTrial TEND GuideToPharmacology TTD                             |
| HRH2    | HRH2    | NIZATIDINE                 | antagonist | TdgClinicalTrial ChEMBLInteractions TEND TTD                              |
| HRH2    | HRH2    | HISTAMINE                  | agonist    | TdgClinicalTrial                                                          |
| HRH2    | HRH2    | ARPROMIDINE                | agonist    | GuideToPharmacology                                                       |
| HRH2    | HRH2    | ASENAPINE                  | antagonist | TdgClinicalTrial                                                          |
| HRH2    | HRH2    | MK-0249                    | antagonist | GuideToPharmacology                                                       |
| HRH2    | HRH2    | DOXEPIN                    | antagonist | TdgClinicalTrial                                                          |
| HRH2    | HRH2    | FAMOTIDINE                 | antagonist | TdgClinicalTrial ChEMBLInteractions TEND GuideToPharmacology TTD          |
| HRH2    | HRH2    | CIMETIDINE                 | antagonist | TdgClinicalTrial ChEMBLInteractions TEND GuideToPharmacology TTD          |
| HRH2    | HRH2    | CHEMBL472273               | agonist    | GuideToPharmacology                                                       |
| HRH2    | HRH2    | AMTHAMINE                  | agonist    | GuideToPharmacology                                                       |
| HRH2    | HRH2    | TOLAZOLINE HYDROCHLORIDE   | agonist    | ChEMBLInteractions                                                        |
| HRH2    | HRH2    | IMPROMIDINE                | agonist    | GuideToPharmacology                                                       |
| HRH2    | HRH2    | CIPROXIFAN                 | antagonist | GuideToPharmacology                                                       |
| HRH2    | HRH2    | BURIMAMIDE                 | agonist    | GuideToPharmacology                                                       |
| HRH2    | HRH2    | METHANTHELINE BROMIDE      | antagonist | ChEMBLInteractions                                                        |
| HRH2    | HRH2    | BETAZOLE HYDROCHLORIDE     | agonist    | ChEMBLInteractions                                                        |
| HRH2    | HRH2    | BETAZOLE                   | agonist    | TdgClinicalTrial TEND TTD                                                 |
| HRH2    | HRH2    | EPINASTINE                 | antagonist | TdgClinicalTrial TEND                                                     |
| HRH2    | HRH2    | RANITIDINE HYDROCHLORIDE   | antagonist | ChEMBLInteractions                                                        |
| HRH2    | HRH2    | PITOLISANT                 | antagonist | GuideToPharmacology                                                       |
| HRH2    | HRH2    | CHEMBL351231               | antagonist | GuideToPharmacology                                                       |
| HRH2    | HRH2    | CLOBENPROPIT               | antagonist | GuideToPharmacology                                                       |
| HRH2    | HRH2    | CIMETIDINE HYDROCHLORIDE   | antagonist | ChEMBLInteractions                                                        |
| HRH2    | HRH2    | RANITIDINE BISMUTH CITRATE | antagonist | ChEMBLInteractions                                                        |
| IL2RG   | IL2RG   | DENILEUKIN DIFTITOX        |            | ChEMBLInteractions                                                        |
| IL2RG   | IL2RG   | ALDESLEUKIN                | agonist    | TdgClinicalTrial ChEMBLInteractions TEND                                  |
| IL2RG   | IL2RG   | DACLIZUMAB                 | inhibitor  | ChEMBLInteractions                                                        |
| IL2RG   | IL2RG   | ALDESLEUKIN                | agonist    | TdgClinicalTrial                                                          |
| IL2RG   | IL2RG   | BASILIXIMAB                | inhibitor  | ChEMBLInteractions                                                        |
| SLC28A1 | SLC28A1 | GEMCITABINE                |            | PharmGKB                                                                  |

|         |         |                          |                    |                                            |
|---------|---------|--------------------------|--------------------|--------------------------------------------|
| SLC28A1 | SLC28A1 | ADENOSINE                |                    | DTC                                        |
| SLC28A1 | SLC28A1 | ZIDOVUDINE               |                    | PharmGKB                                   |
| SLC28A1 | SLC28A1 | THYMIDINE                |                    | NCI                                        |
| SLC28A1 | SLC28A1 | URIDINE                  |                    | DTC NCI                                    |
| HAVCR2  | HAVCR2  | LY-3321367               |                    | TTD                                        |
| MMP9    | MMP9    | CELECOXIB                |                    | PharmGKB                                   |
| MMP9    | MMP9    | MARIMASTAT               | inhibitor          | TdgClinicalTrial TEND GuideToPharmacology  |
| MMP9    | MMP9    | ANDECALIXIMAB            | antibody inhibitor | ChemblInteractions GuideToPharmacology TTD |
| MMP9    | MMP9    | ILOMASTAT                | inhibitor          | GuideToPharmacology                        |
| MMP9    | MMP9    | DEMETHYLWEDELOLACTONE    |                    | DTC                                        |
| MMP9    | MMP9    | CURCUMIN                 |                    | TTD                                        |
| MMP9    | MMP9    | PRINOMASTAT              | vaccine            | TALC                                       |
| MMP9    | MMP9    | CGS-27023A               | inhibitor          | GuideToPharmacology                        |
| MMP9    | MMP9    | TOZULERISTIDE            |                    | TTD                                        |
| MMP9    | MMP9    | AZD-1236                 | inhibitor          | GuideToPharmacology                        |
| MMP9    | MMP9    | BEVACIZUMAB              |                    | CIViC                                      |
| MMP9    | MMP9    | S-3304                   | vaccine            | TALC                                       |
| MMP9    | MMP9    | INCYCLINIDE              |                    | TdgClinicalTrial                           |
| MMP9    | MMP9    | CURCUMIN PYRAZOLE        |                    | DTC                                        |
| MMP9    | MMP9    | CARBOXYLATED GLUCOSAMINE |                    | DTC                                        |
| SLCO2B1 | SLCO2B1 | ROSUVASTATIN             |                    | PharmGKB                                   |
| SLCO2B1 | SLCO2B1 | VERLUKAST                | inhibitor          | GuideToPharmacology                        |
| SLCO2B1 | SLCO2B1 | ISOSILYBIN B             |                    | DTC                                        |
| SLCO2B1 | SLCO2B1 | ELTROMBOPAG              |                    | DTC                                        |
| SLCO2B1 | SLCO2B1 | SILDENAFIL               | inhibitor          | GuideToPharmacology                        |
| SLCO2B1 | SLCO2B1 | SILIBININ                |                    | DTC                                        |
| SLCO2B1 | SLCO2B1 | FLUVASTATIN              |                    | PharmGKB                                   |
| SLCO2B1 | SLCO2B1 | SULFOBROMOPHTHALEIN      |                    | DTC                                        |
| SLCO2B1 | SLCO2B1 | GLYBURIDE                | inhibitor          | GuideToPharmacology                        |
| SLCO2B1 | SLCO2B1 | ISOSILYBIN A             |                    | DTC                                        |
| SLCO2B1 | SLCO2B1 | ERLOTINIB                | inhibitor          | GuideToPharmacology                        |
| SLCO2B1 | SLCO2B1 | SCUTELLARIN              |                    | DTC                                        |
| SLCO2B1 | SLCO2B1 | PRAVASTATIN              |                    | PharmGKB                                   |
| SLCO2B1 | SLCO2B1 | ROSIGLITAZONE            |                    | NCI                                        |
| SLCO2B1 | SLCO2B1 | ATORVASTATIN             |                    | PharmGKB                                   |
| SLCO2B1 | SLCO2B1 | SILICRISTIN              |                    | DTC                                        |
| SLCO2B1 | SLCO2B1 | FEXOFENADINE             |                    | PharmGKB                                   |
| SLCO2B1 | SLCO2B1 | SIMVASTATIN              |                    | PharmGKB                                   |
| SLCO2B1 | SLCO2B1 | SILYBIN B                |                    | DTC                                        |
| SLCO2B1 | SLCO2B1 | MONTELUKAST              |                    | PharmGKB                                   |
| SLCO2B1 | SLCO2B1 | LOVASTATIN               |                    | PharmGKB                                   |
| SLCO2B1 | SLCO2B1 | GEMFIBROZIL              | inhibitor          | GuideToPharmacology                        |
| SLCO2B1 | SLCO2B1 | SILYDIANIN               |                    | DTC                                        |
| CD36    | CD36    | ABT-510                  |                    | TdgClinicalTrial                           |
| GJA1    | GJA1    | BLEOMYCIN                |                    | NCI                                        |
| GJA1    | GJA1    | CARVEDILOL               | other/unknown      | NCI                                        |
| GJA1    | GJA1    | CARBENOXOLONE            | inhibitor          | GuideToPharmacology                        |
| GJA1    | GJA1    | OCTANOL                  | inhibitor          | GuideToPharmacology                        |
| GJA1    | GJA1    | EPIGALOCATECHIN GALLATE  |                    | NCI                                        |
| GJA1    | GJA1    | PROPYLTHIOURACIL         |                    | NCI                                        |
| GJA1    | GJA1    | LABETALOL                |                    | NCI                                        |
| GJA1    | GJA1    | ATENOLOL                 |                    | NCI                                        |
| RGS5    | RGS5    | IRINOTECAN               |                    | PharmGKB                                   |
| RGS5    | RGS5    | BEVACIZUMAB              |                    | PharmGKB                                   |
| RGS5    | RGS5    | FLUOROURACIL             |                    | PharmGKB                                   |
| RGS5    | RGS5    | LEUCOVORIN               |                    | PharmGKB                                   |
| CD248   | CD248   | ONTUXIZUMAB              | inhibitor          | TdgClinicalTrial ChemblInteractions TTD    |
| WT1     | WT1     | CYTARABINE               |                    | CIViC                                      |
| WT1     | WT1     | DIMETHYL SULFOXIDE       |                    | NCI                                        |
| WT1     | WT1     | HALOFUGINONE             |                    | NCI                                        |
| WT1     | WT1     | SIROLIMUS                |                    | NCI                                        |

|          |          |                      |                              |                                                             |
|----------|----------|----------------------|------------------------------|-------------------------------------------------------------|
| WT1      | WT1      | CURCUMIN             |                              | NCI                                                         |
| WT1      | WT1      | DEFEROXAMINE         |                              | NCI                                                         |
| WT1      | WT1      | DAUNORUBICIN         |                              | CIViC                                                       |
| SLC39A14 | SLC39A14 | NORTRIPTYLINE        |                              | PharmGKB                                                    |
| ANO1     | ANO1     | CROFELEMER           | blocker antagonist inhibitor | ChemblInteractions GuideToPharmacology                      |
| ANO1     | ANO1     | MIBEFRADIL           | blocker                      | GuideToPharmacology                                         |
| ANO1     | ANO1     | FLUOXETINE           | blocker                      | GuideToPharmacology                                         |
| PROC     | PROC     | AVATROMBOPAG         |                              | PharmGKB FDA                                                |
| PROC     | PROC     | PROGESTERONE         |                              | FDA                                                         |
| PROC     | PROC     | ANCROD               |                              | TTD                                                         |
| PROC     | PROC     | WARFARIN             |                              | FDA                                                         |
| PROC     | PROC     | LUSUTROMBOPAG        |                              | PharmGKB FDA                                                |
| PROC     | PROC     | MENADIONE            | activator                    | TEND                                                        |
| PROC     | PROC     | ESTRADIOL            |                              | FDA                                                         |
| PROC     | PROC     | PHENPROCUMON         |                              | PharmGKB                                                    |
| BDKRB2   | BDKRB2   | ICATIBANT            | antagonist                   | TdgClinicalTrial TEND GuideToPharmacology TTD               |
| BDKRB2   | BDKRB2   | LISINOPRIL           |                              | PharmGKB                                                    |
| BDKRB2   | BDKRB2   | ANATIBANT            | antagonist                   | TdgClinicalTrial ChemblInteractions GuideToPharmacology TTD |
| BDKRB2   | BDKRB2   | BRADYKININ           | agonist                      | GuideToPharmacology TTD                                     |
| BDKRB2   | BDKRB2   | ATORVASTATIN         |                              | PharmGKB                                                    |
| BDKRB2   | BDKRB2   | DELTIBANT            |                              | TTD                                                         |
| BDKRB2   | BDKRB2   | ICATIBANT ACETATE    | antagonist                   | ChemblInteractions                                          |
| BDKRB2   | BDKRB2   | LABRADIMIL           | agonist                      | ChemblInteractions GuideToPharmacology                      |
| BDKRB2   | BDKRB2   | ENALAPRIL            |                              | PharmGKB                                                    |
| BDKRB2   | BDKRB2   | VOLANESORSEN SODIUM  |                              | NCI                                                         |
| BDKRB2   | BDKRB2   | CHEMBL446325         | antagonist                   | GuideToPharmacology                                         |
| BDKRB2   | BDKRB2   | FASITIBANT CHLORIDE  | antagonist                   | ChemblInteractions                                          |
| BDKRB2   | BDKRB2   | IMIDAPRIL            |                              | PharmGKB                                                    |
| NGF      | NGF      | MEDI-578             |                              | TTD                                                         |
| NGF      | NGF      | TANEZUMAB            | inhibitor                    | TdgClinicalTrial ChemblInteractions TTD                     |
| NGF      | NGF      | FASINUMAB            | inhibitor                    | ChemblInteractions TTD                                      |
| NGF      | NGF      | METHADONE            |                              | PharmGKB                                                    |
| NGF      | NGF      | FULRANUMAB           | inhibitor                    | ChemblInteractions                                          |
| PLG      | PLG      | UROKINASE            | activator                    | TdgClinicalTrial ChemblInteractions TEND                    |
| PLG      | PLG      | ANISTREPLASE         | activator                    | TdgClinicalTrial TEND TTD                                   |
| PLG      | PLG      | ALTEPLASE            | activator                    | TdgClinicalTrial ChemblInteractions NCI TEND TTD            |
| PLG      | PLG      | DESMOTEPLASE         | activator                    | TdgClinicalTrial ChemblInteractions TTD                     |
| PLG      | PLG      | NYSTATIN             |                              | NCI                                                         |
| PLG      | PLG      | APROTININ            | inhibitor                    | ChemblInteractions GuideToPharmacology                      |
| PLG      | PLG      | RETEPLASE            | activator                    | TdgClinicalTrial ChemblInteractions TEND TTD                |
| PLG      | PLG      | BORTEZOMIB           |                              | DTC                                                         |
| PLG      | PLG      | DANAZOL              |                              | NCI                                                         |
| PLG      | PLG      | CHEMBL35482          |                              | NCI                                                         |
| PLG      | PLG      | AMEDIPLASE           |                              | TdgClinicalTrial                                            |
| PLG      | PLG      | STREPTOKINASE        | activator                    | TdgClinicalTrial ChemblInteractions TEND TTD                |
| PLG      | PLG      | PREDNISOLONE         |                              | NCI                                                         |
| PLG      | PLG      | TENECTEPLASE         | activator                    | TdgClinicalTrial ChemblInteractions TEND TTD                |
| PLG      | PLG      | NORETHINDRONE        |                              | NCI                                                         |
| PLG      | PLG      | RADIOSUMIN B         |                              | DTC                                                         |
| PLG      | PLG      | RANOLAZINE           |                              | TTD                                                         |
| PLG      | PLG      | AMINOCAPROIC ACID    | inhibitor                    | ChemblInteractions                                          |
| PLG      | PLG      | LEPIRUDIN            |                              | NCI                                                         |
| PLG      | PLG      | COUMARIN             |                              | NCI                                                         |
| PLG      | PLG      | INOSITOL             |                              | NCI                                                         |
| PLG      | PLG      | TRANEXAMIC ACID      | inhibitor                    | ChemblInteractions                                          |
| PLG      | PLG      | GARLIC               |                              | NCI                                                         |
| PLG      | PLG      | GENISTEIN            |                              | NCI                                                         |
| PLG      | PLG      | HUMAN GROWTH HORMONE |                              | NCI                                                         |
| PLG      | PLG      | DEFIBROTIDE SODIUM   | activator                    | ChemblInteractions                                          |
| PLG      | PLG      | FIBRINOLYSIN, HUMAN  |                              | TdgClinicalTrial                                            |
| PLG      | PLG      | OXYMETHOLONE         |                              | NCI                                                         |

|      |      |                    |            |                                                                                                                 |
|------|------|--------------------|------------|-----------------------------------------------------------------------------------------------------------------|
| PLG  | PLG  | MELAGATRAN         |            | TTD                                                                                                             |
| FLT1 | FLT1 | DOVITINIB          | inhibitor  | DTC TdgClinicalTrial ClarityFoundationClinicalTrial ChembllInteractions GuideToPharmacology CancerCommons       |
| FLT1 | FLT1 | VANDETANIB         | inhibitor  | DTC TdgClinicalTrial ClarityFoundationClinicalTrial ChembllInteractions MyCancerGenomeClinicalTrial             |
| FLT1 | FLT1 | NINTEDANIB         | inhibitor  | TALC MyCancerGenome TdgClinicalTrial ClarityFoundationClinicalTrial GuideToPharmacology                         |
| FLT1 | FLT1 | AXITINIB           | inhibitor  | TALC MyCancerGenome TdgClinicalTrial ChembllInteractions CancerCommons MyCancerGenomeClinicalTrial PharmGKB     |
| FLT1 | FLT1 | LINIFANIB          | inhibitor  | DTC MyCancerGenome TdgClinicalTrial ChembllInteractions GuideToPharmacology                                     |
| FLT1 | FLT1 | L-21649            | inhibitor  | ChembllInteractions                                                                                             |
| FLT1 | FLT1 | REGORAFENIB        | inhibitor  | TALC MyCancerGenome ChembllInteractions MyCancerGenomeClinicalTrial                                             |
| FLT1 | FLT1 | SUNITINIB          | inhibitor  | TALC DTC TdgClinicalTrial CGI TEND MyCancerGenomeClinicalTrial PharmGKB                                         |
| FLT1 | FLT1 | SORAFENIB          | inhibitor  | DTC MyCancerGenome MyCancerGenomeClinicalTrial PharmGKB                                                         |
| FLT1 | FLT1 | PAZOPANIB          | inhibitor  | TALC DTC MyCancerGenome TdgClinicalTrial GuideToPharmacology MyCancerGenomeClinicalTrial                        |
| FLT1 | FLT1 | TESEVATINIB        | inhibitor  | MyCancerGenome TdgClinicalTrial                                                                                 |
| FLT1 | FLT1 | CEDIRANIB          | inhibitor  | TALC DTC TdgClinicalTrial ClarityFoundationClinicalTrial ChembllInteractions GuideToPharmacology CancerCommons  |
| FLT1 | FLT1 | TELATINIB          |            | TdgClinicalTrial                                                                                                |
| FLT1 | FLT1 | SUNITINIB MALATE   | inhibitor  | ChembllInteractions                                                                                             |
| FLT1 | FLT1 | SEMAXANIB          | inhibitor  | ChembllInteractions GuideToPharmacology                                                                         |
| FLT1 | FLT1 | TIVOZANIB          | inhibitor  | TALC MyCancerGenome TdgClinicalTrial ClarityFoundationClinicalTrial ChembllInteractions GuideToPharmacology TTD |
| FLT1 | FLT1 | MOTESANIB          | inhibitor  | TALC MyCancerGenome TdgClinicalTrial ChembllInteractions GuideToPharmacology PharmGKB                           |
| FLT1 | FLT1 | AG-13958           | inhibitor  | ChembllInteractions                                                                                             |
| FLT1 | FLT1 | PEGPLERANIB SODIUM |            | TdgClinicalTrial                                                                                                |
| FLT1 | FLT1 | TG100-801          | inhibitor  | ChembllInteractions                                                                                             |
| FLT1 | FLT1 | ENMD-2076          | inhibitor  | MyCancerGenome                                                                                                  |
| FLT1 | FLT1 | PF-00562271        |            | DTC                                                                                                             |
| FLT1 | FLT1 | CHEMBL1997335      |            | DTC                                                                                                             |
| FLT1 | FLT1 | FAMITINIB          | inhibitor  | ChembllInteractions TTD                                                                                         |
| FLT1 | FLT1 | LUCITANIB          | inhibitor  | ChembllInteractions GuideToPharmacology MyCancerGenomeClinicalTrial                                             |
| FLT1 | FLT1 | FRUQUINTINIB       | inhibitor  | TdgClinicalTrial ChembllInteractions GuideToPharmacology TTD                                                    |
| FLT1 | FLT1 | SURUFATINIB        | inhibitor  | ChembllInteractions TTD                                                                                         |
| FLT1 | FLT1 | JNJ-7706621        |            | DTC                                                                                                             |
| FLT1 | FLT1 | RG-1530            | inhibitor  | DTC ChembllInteractions GuideToPharmacology                                                                     |
| FLT1 | FLT1 | PEXIDARTINIB       | inhibitor  | GuideToPharmacology                                                                                             |
| FLT1 | FLT1 | AZD-1152-HQPA      |            | DTC                                                                                                             |
| FLT1 | FLT1 | ICRUCUMAB          | antagonist | ChembllInteractions                                                                                             |
| FLT1 | FLT1 | CEP-5214           | inhibitor  | DTC ChembllInteractions                                                                                         |
| FLT1 | FLT1 | BRIVANIB           | inhibitor  | ChembllInteractions GuideToPharmacology                                                                         |
| FLT1 | FLT1 | ILORASERTIB        | inhibitor  | DTC ChembllInteractions GuideToPharmacology                                                                     |
| FLT1 | FLT1 | GLESATINIB         | inhibitor  | TALC MyCancerGenome TdgClinicalTrial                                                                            |
| FLT1 | FLT1 | CHIAURANIB         | inhibitor  | ChembllInteractions                                                                                             |
| FLT1 | FLT1 | GO-6976            |            | DTC                                                                                                             |
| FLT1 | FLT1 | BMS-690514         | inhibitor  | ChembllInteractions                                                                                             |
| FLT1 | FLT1 | VATALANIB          | inhibitor  | TALC DTC MyCancerGenome TdgClinicalTrial ChembllInteractions GuideToPharmacology                                |
| FLT1 | FLT1 | CEP-11981          | inhibitor  | ChembllInteractions GuideToPharmacology TTD                                                                     |
| FLT1 | FLT1 | XL-999             | inhibitor  | ChembllInteractions                                                                                             |
| FLT1 | FLT1 | R-406              |            | DTC                                                                                                             |
| FLT1 | FLT1 | XL-820             | inhibitor  | ChembllInteractions                                                                                             |
| FLT1 | FLT1 | DORSOMORPHIN       | inhibitor  | GuideToPharmacology                                                                                             |
| FLT1 | FLT1 | X-82               | inhibitor  | MyCancerGenome ChembllInteractions TTD                                                                          |
| FLT1 | FLT1 | ENTRECTINIB        |            | DTC                                                                                                             |
| FLT1 | FLT1 | SP-600125          |            | DTC                                                                                                             |
| FLT1 | FLT1 | TAK-593            | inhibitor  | ChembllInteractions                                                                                             |
| FLT1 | FLT1 | SITRAVATINIB       | inhibitor  | GuideToPharmacology                                                                                             |
| FLT1 | FLT1 | TOZASERTIB         |            | DTC                                                                                                             |
| FLT1 | FLT1 | MK-2461            | inhibitor  | GuideToPharmacology                                                                                             |
| FLT1 | FLT1 | PEXMETINIB         | inhibitor  | GuideToPharmacology                                                                                             |
| FLT1 | FLT1 | OSI-930            | inhibitor  | ChembllInteractions GuideToPharmacology                                                                         |
| FLT1 | FLT1 | CYC-116            |            | DTC                                                                                                             |
| FLT1 | FLT1 | RABEPRAZOLE SODIUM | inhibitor  | MyCancerGenome TTD                                                                                              |
| FLT1 | FLT1 | CENISERTIB         |            | DTC                                                                                                             |
| FLT1 | FLT1 | ABICIPAR PEGOL     |            | TdgClinicalTrial                                                                                                |
| FLT1 | FLT1 | SU-014813          | inhibitor  | ChembllInteractions GuideToPharmacology                                                                         |
| FLT1 | FLT1 | SORAFENIB TOSYLATE | inhibitor  | ChembllInteractions                                                                                             |



|        |        |                             |                    |                                                                      |
|--------|--------|-----------------------------|--------------------|----------------------------------------------------------------------|
| FLT1   | FLT1   | LENVATINIB                  | inhibitor          | TALC TdgClinicalTrial                                                |
| FLT1   | FLT1   | TAE-684                     |                    | DTC                                                                  |
| FLT1   | FLT1   | TELBERMIN                   | agonist            | ChemblInteractions                                                   |
| FLT1   | FLT1   | DORAMAPIMOD                 |                    | DTC                                                                  |
| FLT1   | FLT1   | MGCD-265                    | inhibitor          | ChemblInteractions                                                   |
| FLT1   | FLT1   | PAZOPANIB HYDROCHLORIDE     | inhibitor          | ChemblInteractions                                                   |
| FLT1   | FLT1   | FORETINIB                   | inhibitor          | MyCancerGenome ChemblInteractions GuideToPharmacology                |
| FLT1   | FLT1   | CP-459632                   | inhibitor          | ChemblInteractions                                                   |
| FLT1   | FLT1   | GW843682X                   |                    | DTC                                                                  |
| FLT1   | FLT1   | VEGFRECINE                  |                    | DTC                                                                  |
| FLT1   | FLT1   | KRN-633                     | inhibitor          | ChemblInteractions                                                   |
| FLT1   | FLT1   | LENVATINIB MESYLATE         | inhibitor          | ChemblInteractions                                                   |
| FLT1   | FLT1   | BRIVANIB ALANINATE          | inhibitor          | ChemblInteractions                                                   |
| FLT1   | FLT1   | ORANTINIB                   | inhibitor          | MyCancerGenome                                                       |
| FLT1   | FLT1   | 4SC-203                     | inhibitor          | ChemblInteractions                                                   |
| FLT1   | FLT1   | OSI-632                     |                    | DTC                                                                  |
| FLT1   | FLT1   | KENPAULLONE                 |                    | DTC                                                                  |
| FLT1   | FLT1   | AEE-788                     | inhibitor          | ChemblInteractions                                                   |
| FLT1   | FLT1   | ALISERTIB                   |                    | DTC                                                                  |
| FLT1   | FLT1   | AST-487                     |                    | DTC                                                                  |
| FLT1   | FLT1   | MUPARFOSTAT                 |                    | TdgClinicalTrial                                                     |
| FLT1   | FLT1   | CEP-7055                    | inhibitor          | ChemblInteractions                                                   |
| FLT1   | FLT1   | ERLOTINIB                   |                    | DTC                                                                  |
| FLT1   | FLT1   | NINTEDANIB ESYLATE          | inhibitor          | ChemblInteractions                                                   |
| FLT1   | FLT1   | PD-0166285                  |                    | DTC                                                                  |
| TPSB2  | TPSB2  | VOLANESORSEN SODIUM         |                    | NCI                                                                  |
| TPSB2  | TPSB2  | HEPARIN                     |                    | NCI                                                                  |
| DSP    | DSP    | ENALAPRIL                   |                    | NCI                                                                  |
| LAMC2  | LAMC2  | OCRIPLASMIN                 |                    | ChemblInteractions                                                   |
| PAH    | PAH    | SAPROPTERIN                 |                    | TdgClinicalTrial TEND                                                |
| PAH    | PAH    | SAPROPTERIN DIHYDROCHLORIDE | activator          | ChemblInteractions                                                   |
| PAH    | PAH    | CARBOCYSTEINE               |                    | PharmGKB                                                             |
| PAH    | PAH    | SAPROPTERIN                 | activator cofactor | TdgClinicalTrial TEND GuideToPharmacology                            |
| PAH    | PAH    | FENCLOLINE                  | inhibitor          | GuideToPharmacology                                                  |
| PAH    | PAH    | PEGVALIASE                  |                    | TTD                                                                  |
| CYBB   | CYBB   | APIGENIN                    |                    | DTC                                                                  |
| CYBB   | CYBB   | CHRYSLIN                    |                    | DTC                                                                  |
| CYBB   | CYBB   | LUTEOLIN                    |                    | DTC                                                                  |
| F2RL3  | F2RL3  | RUSALATIDE                  |                    | TdgClinicalTrial                                                     |
| F2RL3  | F2RL3  | VORAPAXAR                   |                    | TdgClinicalTrial                                                     |
| TEK    | TEK    | CE-245677                   | inhibitor          | ChemblInteractions                                                   |
| TEK    | TEK    | CETIRIZINE                  |                    | DTC                                                                  |
| TEK    | TEK    | CEP-11981                   | inhibitor          | ChemblInteractions GuideToPharmacology TTD                           |
| TEK    | TEK    | REGORAFENIB                 | inhibitor          | TALC TdgClinicalTrial ChemblInteractions MyCancerGenomeClinicalTrial |
| TEK    | TEK    | GLESATINIB                  | inhibitor          | TALC TdgClinicalTrial                                                |
| TEK    | TEK    | LOPERAMIDE                  |                    | DTC                                                                  |
| TEK    | TEK    | FORETINIB                   | inhibitor          | ChemblInteractions                                                   |
| TEK    | TEK    | LINIFANIB                   | inhibitor          | TdgClinicalTrial GuideToPharmacology                                 |
| TEK    | TEK    | ALTIRATINIB                 | inhibitor          | ChemblInteractions GuideToPharmacology TTD                           |
| TEK    | TEK    | REBASTINIB                  |                    | TTD                                                                  |
| TEK    | TEK    | PEXMETINIB                  | inhibitor          | TdgClinicalTrial ChemblInteractions GuideToPharmacology              |
| TEK    | TEK    | MGCD-265                    | inhibitor          | ChemblInteractions                                                   |
| TEK    | TEK    | RAZUPROTAFIB                |                    | TTD                                                                  |
| TEK    | TEK    | CABOZANTINIB                |                    | ClarityFoundationClinicalTrial                                       |
| TEK    | TEK    | GW559768X                   |                    | DTC                                                                  |
| TEK    | TEK    | AMPICILLIN                  |                    | DTC                                                                  |
| TEK    | TEK    | MERESTINIB                  | inhibitor          | GuideToPharmacology                                                  |
| TEK    | TEK    | VANDETANIB                  | inhibitor          | ChemblInteractions                                                   |
| SLPI   | SLPI   | HEPARIN                     |                    | NCI                                                                  |
| SLC2A5 | SLC2A5 | STREPTOZOCIN                |                    | NCI                                                                  |
| SLC2A5 | SLC2A5 | GLUFOSFAMIDE                |                    | TdgClinicalTrial                                                     |

|        |        |                               |           |                         |
|--------|--------|-------------------------------|-----------|-------------------------|
| F3     | F3     | SIMVASTATIN                   |           | PharmGKB                |
| TUBA3D | TUBA3D | ZAMPANOLIDE                   |           | DTC                     |
| TUBA3D | TUBA3D | VINORELBINE TARTRATE          | inhibitor | ChemblInteractions      |
| TUBA3D | TUBA3D | VORINOSTAT                    |           | DTC                     |
| TUBA3D | TUBA3D | CABAZITAXEL                   | inhibitor | ChemblInteractions      |
| TUBA3D | TUBA3D | DOCETAXEL                     | inhibitor | ChemblInteractions      |
| TUBA3D | TUBA3D | CHEMBL1935538                 |           | DTC                     |
| TUBA3D | TUBA3D | ERIBULIN MESYLATE             | inhibitor | ChemblInteractions      |
| TUBA3D | TUBA3D | INDIBULIN                     | inhibitor | ChemblInteractions      |
| TUBA3D | TUBA3D | FOSBRETABULIN TROMETHAMINE    |           | ChemblInteractions      |
| TUBA3D | TUBA3D | SAGOPILONE                    |           | ChemblInteractions      |
| TUBA3D | TUBA3D | VINFLUNINE                    | inhibitor | ChemblInteractions      |
| TUBA3D | TUBA3D | VINBLASTINE                   |           | DTC                     |
| TUBA3D | TUBA3D | PLINABULIN                    | inhibitor | ChemblInteractions      |
| TUBA3D | TUBA3D | LEXIBULIN                     | inhibitor | ChemblInteractions      |
| TUBA3D | TUBA3D | COLCHICINE                    | inhibitor | DTC ChemblInteractions  |
| TUBA3D | TUBA3D | PACLITAXEL                    | inhibitor | DTC ChemblInteractions  |
| TUBA3D | TUBA3D | VINORELBINE                   |           | DTC                     |
| TUBA3D | TUBA3D | CHEMBL1795737                 |           | DTC                     |
| TUBA3D | TUBA3D | TRASTUZUMAB EMTANSINE         | inhibitor | ChemblInteractions      |
| TUBA3D | TUBA3D | NOCODAZOLE                    |           | DTC                     |
| TUBA3D | TUBA3D | PACLITAXEL POLIGLUMEX         |           | ChemblInteractions      |
| TUBA3D | TUBA3D | PODOFILOX                     |           | DTC                     |
| TUBA3D | TUBA3D | CHEMBL2036119                 |           | DTC                     |
| TUBA3D | TUBA3D | CYCLOSTREPTIN                 |           | DTC                     |
| TUBA3D | TUBA3D | VERUBULIN                     |           | ChemblInteractions      |
| TUBA3D | TUBA3D | MAYTANSINOL                   |           | DTC                     |
| TUBA3D | TUBA3D | VINBLASTINE SULFATE           | inhibitor | ChemblInteractions      |
| TUBA3D | TUBA3D | CHEMBL2036124                 |           | DTC                     |
| TUBA3D | TUBA3D | CHEMBL453818                  |           | DTC                     |
| TUBA3D | TUBA3D | LARGAZOLE                     |           | DTC                     |
| TUBA3D | TUBA3D | VINCRISTINE                   |           | DTC                     |
| TUBA3D | TUBA3D | IXABEPILONE                   | inhibitor | ChemblInteractions      |
| TUBA3D | TUBA3D | VINCRISTINE SULFATE           | inhibitor | ChemblInteractions      |
| TUBA3D | TUBA3D | MAYTANSINE                    |           | DTC                     |
| TUBA3D | TUBA3D | CROLIBULIN                    | inhibitor | ChemblInteractions      |
| TUBA3D | TUBA3D | FOSBRETABULIN DISODIUM        | inhibitor | ChemblInteractions      |
| TUBA3D | TUBA3D | CURCUMIN                      |           | DTC                     |
| TUBA3D | TUBA3D | BRENTUXIMAB VEDOTIN           | inhibitor | ChemblInteractions      |
| TUBA3D | TUBA3D | COMBRETASTATIN A4             |           | DTC                     |
| TUBA3D | TUBA3D | DAVUNETIDE                    |           | ChemblInteractions      |
| TUBA3D | TUBA3D | ABT-751                       |           | DTC                     |
| FN1    | FN1    | L19IL2                        |           | ChemblInteractions      |
| FN1    | FN1    | OCRIPLASMIN                   | cleavage  | ChemblInteractions TTD  |
| FN1    | FN1    | L19SIP 131I                   |           | ChemblInteractions      |
| FN1    | FN1    | L19TNFA                       |           | ChemblInteractions      |
| CYP1B1 | CYP1B1 | AMINOGLUTETHIMIDE             |           | NCI                     |
| CYP1B1 | CYP1B1 | ANASTROZOLE                   |           | NCI                     |
| CYP1B1 | CYP1B1 | FORMESTANE                    |           | NCI                     |
| CYP1B1 | CYP1B1 | PACLITAXEL                    |           | PharmGKB                |
| CYP1B1 | CYP1B1 | FLUOROURACIL                  |           | PharmGKB                |
| CYP1B1 | CYP1B1 | FADROZOLE                     |           | NCI                     |
| CYP1B1 | CYP1B1 | DOCETAXEL                     |           | PharmGKB                |
| CYP1B1 | CYP1B1 | ACACETIN                      |           | DTC                     |
| CYP1B1 | CYP1B1 | TOREMIFENE                    |           | NCI                     |
| CYP1B1 | CYP1B1 | EPIRUBICIN                    |           | PharmGKB                |
| CYP1B1 | CYP1B1 | CYCLOPHOSPHAMIDE              |           | PharmGKB                |
| CYP1B1 | CYP1B1 | CHRY SIN                      | inhibitor | DTC GuideToPharmacology |
| CYP1B1 | CYP1B1 | ISOPROPYL ALCOHOL             |           | NCI                     |
| CYP1B1 | CYP1B1 | 2'H,4H-[2,8'-BICHROMEN]-4-ONE |           | DTC                     |
| CYP1B1 | CYP1B1 | PINOCEMBRIN                   |           | TTD                     |

|          |          |                               |                   |                                                              |
|----------|----------|-------------------------------|-------------------|--------------------------------------------------------------|
| CYP1B1   | CYP1B1   | SPIRONOLACTONE                |                   | NCI                                                          |
| CYP1B1   | CYP1B1   | RISPERIDONE                   |                   | PharmGKB                                                     |
| CYP1B1   | CYP1B1   | AMODIAQUINE                   |                   | PharmGKB                                                     |
| CYP1B1   | CYP1B1   | DOXORUBICIN                   |                   | PharmGKB                                                     |
| CYP1B1   | CYP1B1   | ALPHA-NAPHTHOFLAVONE          |                   | DTC                                                          |
| CYP1B1   | CYP1B1   | RIFAMPIN                      |                   | NCI                                                          |
| CYP1B1   | CYP1B1   | CHEMBL2347759                 |                   | DTC                                                          |
| CYP1B1   | CYP1B1   | NARINGENIN                    |                   | TTD                                                          |
| CYP1B1   | CYP1B1   | EXEMESTANE                    |                   | NCI                                                          |
| CYP1B1   | CYP1B1   | MEDROXYPROGESTERONE ACETATE   |                   | NCI                                                          |
| CYP1B1   | CYP1B1   | 2'H,4H-[2,5'-BICHROMEN]-4-ONE |                   | DTC                                                          |
| CYP1B1   | CYP1B1   | LETROZOLE                     |                   | NCI                                                          |
| CYP1B1   | CYP1B1   | BETA-NAPHTHOFLAVONE           |                   | DTC                                                          |
| PDGFD    | PDGFD    | SUNITINIB                     | inhibitor         | MyCancerGenomeClinicalTrial                                  |
| CA4      | CA4      | SULFAMYLON                    |                   | TTD                                                          |
| CA4      | CA4      | METHAZOLAMIDE                 | inhibitor         | ChemblInteractions GuideToPharmacology                       |
| CA4      | CA4      | ETHOXZOLAMIDE                 | inhibitor         | ChemblInteractions                                           |
| CA4      | CA4      | PARABEN                       |                   | TTD                                                          |
| CA4      | CA4      | PHENOL                        |                   | TTD                                                          |
| CA4      | CA4      | TOPIRAMATE                    | inhibitor         | TdgClinicalTrial ChemblInteractions TEND GuideToPharmacology |
| CA4      | CA4      | ACETAZOLAMIDE                 | inhibitor         | ChemblInteractions GuideToPharmacology                       |
| CA4      | CA4      | CHLOROTHIAZIDE                | inhibitor         | TdgClinicalTrial TEND                                        |
| CA4      | CA4      | TRICHLORMETHIAZIDE            | inhibitor         | TdgClinicalTrial TEND                                        |
| CA4      | CA4      | DICHLORPHENAMIDE              | inhibitor         | ChemblInteractions GuideToPharmacology                       |
| CA4      | CA4      | ACETAZOLAMIDE SODIUM          | inhibitor         | ChemblInteractions                                           |
| CA4      | CA4      | CHLORTHALIDONE                | inhibitor         | GuideToPharmacology                                          |
| CA4      | CA4      | BRINZOLAMIDE                  | inhibitor         | TTD                                                          |
| CA4      | CA4      | SULFAMIDE                     |                   | TTD                                                          |
| CA4      | CA4      | CURCUMIN                      |                   | TTD                                                          |
| GJB1     | GJB1     | CARBENOXOLONE                 | inhibitor         | GuideToPharmacology                                          |
| GJB1     | GJB1     | OCTANOL                       | inhibitor         | GuideToPharmacology                                          |
| VCAN     | VCAN     | CYCLOSPORINE                  |                   | NCI                                                          |
| KCNK3    | KCNK3    | HALOTHANE                     | binder activator  | ChemblInteractions GuideToPharmacology                       |
| KCNK3    | KCNK3    | DOXAPRAM HYDROCHLORIDE        | blocker           | ChemblInteractions                                           |
| KCNK3    | KCNK3    | ENFLURANE                     |                   | ChemblInteractions                                           |
| KCNK3    | KCNK3    | SEVOFLURANE                   |                   | ChemblInteractions                                           |
| KCNK3    | KCNK3    | ISOFLURANE                    |                   | ChemblInteractions                                           |
| KCNK3    | KCNK3    | ANANDAMIDE                    | blocker           | GuideToPharmacology                                          |
| KCNK3    | KCNK3    | DESFLURANE                    |                   | ChemblInteractions                                           |
| KCNK3    | KCNK3    | CANDESARTAN                   |                   | PharmGKB                                                     |
| SORCS2   | SORCS2   | ATAZANAVIR                    |                   | PharmGKB                                                     |
| NGFR     | NGFR     | VOCLOSPORIN                   |                   | TTD                                                          |
| NGFR     | NGFR     | FULRANUMAB                    |                   | TTD                                                          |
| NGFR     | NGFR     | CENEGERMIN                    |                   | TTD                                                          |
| CCL20    | CCL20    | GSK-3050002                   |                   | TTD                                                          |
| SERPINE1 | SERPINE1 | DEFIBROTIDE                   |                   | NCI                                                          |
| SERPINE1 | SERPINE1 | LEVOTHYROXINE                 |                   | NCI                                                          |
| SERPINE1 | SERPINE1 | CITALOPRAM                    |                   | PharmGKB                                                     |
| SERPINE1 | SERPINE1 | CETRORELIX                    |                   | NCI                                                          |
| SERPINE1 | SERPINE1 | UROKINASE                     | inducer substrate | TdgClinicalTrial                                             |
| SERPINE1 | SERPINE1 | ALEPLASININ                   | inhibitor         | ChemblInteractions                                           |
| SERPINE1 | SERPINE1 | REGRAMOSTIM                   |                   | NCI                                                          |
| SERPINE1 | SERPINE1 | FLUOXETINE                    |                   | PharmGKB                                                     |
| SERPINE1 | SERPINE1 | DEXAMETHASONE                 |                   | PharmGKB                                                     |
| SERPINE1 | SERPINE1 | VASOPRESSIN                   |                   | NCI                                                          |
| SERPINE1 | SERPINE1 | TIPLASININ                    |                   | DTC                                                          |
| SERPINE1 | SERPINE1 | NIMODIPINE                    |                   | NCI                                                          |
| SERPINE1 | SERPINE1 | DALTEPARIN                    |                   | NCI                                                          |
| SERPINE1 | SERPINE1 | PREMARIN                      |                   | NCI                                                          |
| SERPINE1 | SERPINE1 | ORLISTAT                      |                   | NCI                                                          |
| SERPINE1 | SERPINE1 | CAPTOPRIL                     |                   | NCI                                                          |

|          |          |                                      |                      |                                            |
|----------|----------|--------------------------------------|----------------------|--------------------------------------------|
| SERPINE1 | SERPINE1 | URIDINE                              |                      | NCI                                        |
| SERPINE1 | SERPINE1 | DIAPLASININ                          |                      | TTD                                        |
| SERPINE1 | SERPINE1 | HYDROCHLOROTHIAZIDE                  |                      | NCI                                        |
| SERPINE1 | SERPINE1 | EPIRUBICIN                           |                      | NCI                                        |
| COL5A1   | COL5A1   | OCRIPLASMIN                          |                      | ChEMBLInteractions                         |
| COL5A1   | COL5A1   | COLLAGENASE CLOSTRIDIUM HISTOLYTICUM |                      | ChEMBLInteractions                         |
| VCAM1    | VCAM1    | TROGLITAZONE                         |                      | NCI                                        |
| VCAM1    | VCAM1    | MERCAPTOPURINE                       |                      | NCI                                        |
| VCAM1    | VCAM1    | DEXAMETHASONE                        |                      | NCI                                        |
| VCAM1    | VCAM1    | CYCLOSPORINE                         |                      | NCI                                        |
| CYP24A1  | CYP24A1  | DEFERASIROX                          |                      | PharmGKB                                   |
| CYP24A1  | CYP24A1  | CHEMBL255088                         | inhibitor            | GuideToPharmacology                        |
| CYP24A1  | CYP24A1  | LUNACALCIPOL                         |                      | TdgClinicalTrial TTD                       |
| CYP24A1  | CYP24A1  | CALCITRIOL                           |                      | DTC                                        |
| CYP24A1  | CYP24A1  | TELAPREVIR                           |                      | PharmGKB                                   |
| COL1A2   | COL1A2   | OCRIPLASMIN                          |                      | ChEMBLInteractions                         |
| COL1A2   | COL1A2   | COLLAGENASE CLOSTRIDIUM HISTOLYTICUM |                      | ChEMBLInteractions TEND                    |
| SLC22A6  | SLC22A6  | TENOFOVIR                            |                      | PharmGKB                                   |
| SLC22A6  | SLC22A6  | PRATOSARTAN                          | inhibitor            | ChEMBLInteractions                         |
| SLC22A6  | SLC22A6  | RUCAPARIB                            |                      | PharmGKB                                   |
| SLC22A6  | SLC22A6  | CIDOFOVIR                            |                      | PharmGKB                                   |
| SLC22A6  | SLC22A6  | GS-9256                              |                      | DTC                                        |
| SLC22A6  | SLC22A6  | PROBENECID                           | inhibitor            | ChEMBLInteractions GuideToPharmacology     |
| SLC22A6  | SLC22A6  | PRAVASTATIN                          |                      | PharmGKB                                   |
| SLC22A6  | SLC22A6  | ZIDOVUDINE                           |                      | PharmGKB                                   |
| IGF2     | IGF2     | XENTUZUMAB                           |                      | TTD                                        |
| IGF2     | IGF2     | CABAZITAXEL                          |                      | CIViC                                      |
| IGF2     | IGF2     | ANASTROZOLE                          |                      | NCI                                        |
| IGF2     | IGF2     | GEFITINIB                            |                      | NCI                                        |
| IGF2     | IGF2     | ETOPOSIDE                            |                      | NCI                                        |
| IGF2     | IGF2     | DOCETAXEL                            |                      | CIViC                                      |
| IGF2     | IGF2     | HUMAN GROWTH HORMONE                 |                      | NCI                                        |
| IGF2     | IGF2     | LINSITINIB                           |                      | CIViC                                      |
| IGF2     | IGF2     | GLUTAMINE                            |                      | NCI                                        |
| IGF2     | IGF2     | BETAMETHASONE                        |                      | NCI                                        |
| IGF2     | IGF2     | DUSIGITUMAB                          | inhibitor            | ChEMBLInteractions TTD                     |
| IGF2     | IGF2     | FLUOXETINE                           |                      | NCI                                        |
| IGF2     | IGF2     | GANITUMAB                            |                      | CIViC                                      |
| IGF2     | IGF2     | GEMCITABINE                          |                      | CIViC                                      |
| SLC6A19  | SLC6A19  | CINROMIDE                            | inhibitor            | GuideToPharmacology                        |
| SLC6A19  | SLC6A19  | BENZATROPINE                         | inhibitor            | GuideToPharmacology                        |
| LTF      | LTF      | BACITRACIN                           |                      | NCI                                        |
| LTF      | LTF      | PARECOXIB                            |                      | TTD                                        |
| LTF      | LTF      | RESERPINE                            |                      | NCI                                        |
| LTF      | LTF      | TALACTOFERRIN ALFA                   |                      | TTD                                        |
| SLC22A12 | SLC22A12 | LESINURAD                            | inhibitor            | ChEMBLInteractions GuideToPharmacology TTD |
| SLC22A12 | SLC22A12 | SULFINPYRAZONE                       | inhibitor            | ChEMBLInteractions                         |
| SLC22A12 | SLC22A12 | PRATOSARTAN                          | inhibitor            | ChEMBLInteractions                         |
| SLC22A12 | SLC22A12 | VERINURAD                            | inhibitor            | GuideToPharmacology                        |
| SLC22A12 | SLC22A12 | ARHALOFENATE                         | inhibitor            | ChEMBLInteractions                         |
| SLC22A12 | SLC22A12 | FLUDARABINE                          |                      | PharmGKB                                   |
| SLC22A12 | SLC22A12 | IDARUBICIN                           |                      | PharmGKB                                   |
| SLC22A12 | SLC22A12 | CYTARABINE                           |                      | PharmGKB                                   |
| REG1A    | REG1A    | ROQUINIMEX                           |                      | NCI                                        |
| REG1A    | REG1A    | INSULIN                              |                      | NCI                                        |
| MMP7     | MMP7     | PRINOMASTAT                          |                      | TTD                                        |
| MMP7     | MMP7     | MARIMASTAT                           | inhibitor antagonist | GuideToPharmacology TTD                    |
| MMP7     | MMP7     | DOXYCYCLINE HYCLATE                  | inhibitor            | ChEMBLInteractions                         |
| MMP7     | MMP7     | DOXYCYCLINE                          | inhibitor            | ChEMBLInteractions                         |
| MMP7     | MMP7     | DOXYCYCLINE                          | inhibitor            | GuideToPharmacology                        |
| MMP7     | MMP7     | DOXYCYCLINE CALCIUM                  | inhibitor            | ChEMBLInteractions                         |

|         |         |                     |           |                    |
|---------|---------|---------------------|-----------|--------------------|
| DES     | DES     | ALTEPLASE           |           | NCI                |
| DES     | DES     | THROMBIN            |           | NCI                |
| FGG     | FGG     | ALFIMEPRASE         |           | TdgClinicalTrial   |
| FGG     | FGG     | EPTIFIBATIDE        |           | PharmGKB           |
| FGG     | FGG     | FIBRINOLYSIN, HUMAN | inhibitor | ChEMBLInteractions |
| FGG     | FGG     | TIROFIBAN           |           | PharmGKB           |
| FGG     | FGG     | ABCIXIMAB           |           | PharmGKB           |
| RBP4    | RBP4    | FENRETINIDE         |           | DTC NCI            |
| RBP4    | RBP4    | ROSIGLITAZONE       |           | NCI                |
| CYP4A11 | CYP4A11 | AMILORIDE           |           | PharmGKB           |
| CYP4A11 | CYP4A11 | SPIRONOLACTONE      |           | PharmGKB           |

### CMAP

| drug                      | cellline | pval        | FDR         |
|---------------------------|----------|-------------|-------------|
| TRICHOSTATIN A            | HL60     | 1.30E-12    | 4.65E-09    |
| TANESPIMYCIN              | HL60     | 3.03E-08    | 5.44E-05    |
| VALPROIC ACID             | HL60     | 4.88E-08    | 5.84E-05    |
| LY-294002                 | HL60     | 1.18E-06    | 0.00106222  |
| LY-294002                 | PC3      | 1.66E-05    | 0.009953761 |
| TRICHOSTATIN A            | PC3      | 1.66E-05    | 0.009953761 |
| TRETINOIN                 | MCF7     | 0.00170032  | 0.087129237 |
| VORINOSTAT                | HL60     | 0.002878702 | 1           |
| 15-DELTA PROSTAGLANDIN J2 | HL60     | 0.003788203 | 1           |
| ALPHA-ESTRADIOL           | HL60     | 0.006282167 | 1           |
| TANESPIMYCIN              | PC3      | 0.013305691 | 1           |
| ALVESPIMYCIN              | HL60     | 0.018594206 | 1           |
| SIROLIMUS                 | HL60     | 0.020864777 | 1           |
| CHLORPROMAZINE            | HL60     | 0.029648688 | 1           |
| TERGURIDE                 | HL60     | 0.031330123 | 1           |
| LYCORINE                  | MCF7     | 0.032774027 | 1           |
| SIROLIMUS                 | MCF7     | 0.034302261 | 1           |
| DIPHEMANIL METILSULFATE   | MCF7     | 0.0421254   | 1           |
| LITHOCHOLIC ACID          | PC3      | 0.047452449 | 1           |
| RALOXIFENE                | HL60     | 0.048218234 | 1           |
| AG-028671                 | PC3      | 0.05309223  | 1           |
| TINIDAZOLE                | MCF7     | 0.054409598 | 1           |
| SIROLIMUS                 | PC3      | 0.054628188 | 1           |
| OFLOXACIN                 | PC3      | 0.055833851 | 1           |
| CEFADROXIL                | MCF7     | 0.056899583 | 1           |
| C-75                      | PC3      | 0.056962793 | 1           |
| MEFLOQUINE                | PC3      | 0.057725839 | 1           |
| IOPANOIC ACID             | MCF7     | 0.060330425 | 1           |
| 0297417-0002B             | MCF7     | 0.061466252 | 1           |
| SCOPOLAMINE N-OXIDE       | MCF7     | 0.061736041 | 1           |
| SULFADIMIDINE             | MCF7     | 0.064758632 | 1           |
| PF-00562151-00            | PC3      | 0.065243736 | 1           |
| DROPROPIZINE              | MCF7     | 0.068876342 | 1           |
| WORTMANNIN                | PC3      | 0.069543942 | 1           |
| SITOSTEROL                | MCF7     | 0.070517524 | 1           |
| DILAZEP                   | PC3      | 0.070668283 | 1           |
| NEOMYCIN                  | MCF7     | 0.072961199 | 1           |
| DEMECLOCYCLINE            | PC3      | 0.073426928 | 1           |
| FLUFENAMIC ACID           | MCF7     | 0.0742278   | 1           |
| CLOPERASTINE              | PC3      | 0.074996742 | 1           |
| CETIRIZINE                | MCF7     | 0.076513043 | 1           |
| CEPHAELINE                | MCF7     | 0.076959928 | 1           |
| ETOPOSIDE                 | MCF7     | 0.078710161 | 1           |
| SCRIPTAID                 | PC3      | 0.079453697 | 1           |
| METARAMINOL               | PC3      | 0.080537634 | 1           |
| DILTIAZEM                 | PC3      | 0.081041895 | 1           |
| PROSCILLARIDIN            | MCF7     | 0.08334244  | 1           |
| DICLOFENAC                | PC3      | 0.083774137 | 1           |
| SULFADIAZINE              | PC3      | 0.084468564 | 1           |
| TORASEMIDE                | MCF7     | 0.085518806 | 1           |
| FUROSEMIDE                | MCF7     | 0.086224728 | 1           |
| NIZATIDINE                | MCF7     | 0.087113645 | 1           |
| URAPIDIL                  | MCF7     | 0.088822648 | 1           |
| ETANIDAZOLE               | MCF7     | 0.090742384 | 1           |
| GELDANAMYCIN              | HL60     | 0.091666037 | 1           |
| NORDIHYDROGUAIARETIC ACID | HL60     | 0.091741948 | 1           |
| ERYTHROMYCIN              | PC3      | 0.09525367  | 1           |
| ROSIGLITAZONE             | HL60     | 0.095645748 | 1           |
| URSOLIC ACID              | PC3      | 0.096602206 | 1           |

|                      |      |             |   |
|----------------------|------|-------------|---|
| METICRANE            | PC3  | 0.096990246 | 1 |
| TREMORINE            | MCF7 | 0.097477017 | 1 |
| PRESTWICK-1100       | MCF7 | 0.09934426  | 1 |
| OZAGREL              | MCF7 | 0.099542431 | 1 |
| ACENOCOUMAROL        | PC3  | 0.104083629 | 1 |
| COLFORSIN            | MCF7 | 0.104392022 | 1 |
| FLUDROXYCORTIDE      | PC3  | 0.111791651 | 1 |
| TROLOX C             | MCF7 | 0.112008871 | 1 |
| FURSULTIAMINE        | MCF7 | 0.112117602 | 1 |
| APIGENIN             | MCF7 | 0.113099857 | 1 |
| ORLISTAT             | PC3  | 0.113209404 | 1 |
| IMIDUREA             | MCF7 | 0.114973301 | 1 |
| TIRATRICOL           | MCF7 | 0.116533978 | 1 |
| MONASTROL            | MCF7 | 0.116596619 | 1 |
| FULVESTRANT          | MCF7 | 0.117127668 | 1 |
| PYRIDOXINE           | MCF7 | 0.121082644 | 1 |
| ACACETIN             | PC3  | 0.121198073 | 1 |
| DILAZEP              | MCF7 | 0.123641517 | 1 |
| PRESTWICK-920        | MCF7 | 0.124228777 | 1 |
| STREPTOMYCIN         | MCF7 | 0.125765574 | 1 |
| PHA-00745360         | MCF7 | 0.125832224 | 1 |
| PNU-0293363          | PC3  | 0.129003418 | 1 |
| CICLACILLIN          | MCF7 | 0.129124537 | 1 |
| CITALOPRAM           | MCF7 | 0.13095165  | 1 |
| HELVETICOSIDE        | PC3  | 0.13168793  | 1 |
| HALCINONIDE          | MCF7 | 0.131810945 | 1 |
| PHA-00851261E        | PC3  | 0.131819148 | 1 |
| AMANTADINE           | MCF7 | 0.131934048 | 1 |
| DOXYLAMINE           | MCF7 | 0.132303875 | 1 |
| PROCAINE             | PC3  | 0.133915479 | 1 |
| DORZOLAMIDE          | MCF7 | 0.135039816 | 1 |
| SOLANINE             | HL60 | 0.135379663 | 1 |
| SECURININE           | HL60 | 0.135468458 | 1 |
| FURSULTIAMINE        | HL60 | 0.135557297 | 1 |
| MEVALOLACTONE        | HL60 | 0.13564618  | 1 |
| APIGENIN             | HL60 | 0.135735106 | 1 |
| LEVCYCLOSERINE       | MCF7 | 0.135793299 | 1 |
| PIPERLONGUMINE       | HL60 | 0.135824076 | 1 |
| TORASEMIDE           | HL60 | 0.13591309  | 1 |
| SANGUINARINE         | HL60 | 0.136002148 | 1 |
| THIOSTREPTON         | HL60 | 0.136091249 | 1 |
| ETAMSYLATE           | HL60 | 0.136180394 | 1 |
| PRESTWICK-967        | HL60 | 0.136269583 | 1 |
| TODRALAZINE          | HL60 | 0.136448091 | 1 |
| FLUVOXAMINE          | HL60 | 0.136626775 | 1 |
| PRESTWICK-1080       | MCF7 | 0.13667634  | 1 |
| CINOXACIN            | HL60 | 0.136716183 | 1 |
| NARINGIN             | HL60 | 0.136805634 | 1 |
| SULFAPHENAZOLE       | HL60 | 0.136895129 | 1 |
| THAPSIGARGIN         | MCF7 | 0.136929425 | 1 |
| APRAMYCIN            | HL60 | 0.136984668 | 1 |
| MECLOFENOXATE        | HL60 | 0.137074251 | 1 |
| OXAMNIQUINE          | HL60 | 0.137343263 | 1 |
| METICRANE            | HL60 | 0.137433021 | 1 |
| PROSCILLARIDIN       | HL60 | 0.137522823 | 1 |
| DEQUALINIUM CHLORIDE | HL60 | 0.137702559 | 1 |
| LYMECYCLINE          | HL60 | 0.137792493 | 1 |
| NAFTIFINE            | HL60 | 0.13788247  | 1 |
| SOTALOL              | HL60 | 0.137972492 | 1 |
| TRACAZOLATE          | HL60 | 0.138062557 | 1 |
| FELODIPINE           | HL60 | 0.138152667 | 1 |

|                       |      |             |   |
|-----------------------|------|-------------|---|
| CHLORAMPHENICOL       | HL60 | 0.13824282  | 1 |
| 8-AZAGUANINE          | HL60 | 0.138423259 | 1 |
| PENTOLONIUM           | MCF7 | 0.138455309 | 1 |
| SULFACHLORPYRIDAZINE  | HL60 | 0.138513544 | 1 |
| ANDROSTERONE          | HL60 | 0.138694247 | 1 |
| ROXARSONE             | HL60 | 0.138875126 | 1 |
| TIABENDAZOLE          | HL60 | 0.138965631 | 1 |
| BICUCULLINE           | MCF7 | 0.13909483  | 1 |
| PINACIDIL             | HL60 | 0.139146774 | 1 |
| PIPEMIDIC ACID        | HL60 | 0.139237411 | 1 |
| ESTROPIPATE           | HL60 | 0.139328093 | 1 |
| F0447-0125            | MCF7 | 0.139351255 | 1 |
| LEVONORGESTREL        | HL60 | 0.139418818 | 1 |
| NATAMYCIN             | HL60 | 0.139509588 | 1 |
| DICLOXACILLIN         | HL60 | 0.139600402 | 1 |
| CEFALOTIN             | HL60 | 0.13969126  | 1 |
| PIMETHIXENE           | HL60 | 0.139782162 | 1 |
| NALBUPHINE            | HL60 | 0.139873108 | 1 |
| HYDROFLUMETHIAZIDE    | HL60 | 0.139964098 | 1 |
| DECAMETHONIUM BROMIDE | HL60 | 0.140055132 | 1 |
| BENZONATATE           | HL60 | 0.140146211 | 1 |
| MORANTEL              | HL60 | 0.1403285   | 1 |
| IPRATROPIUM BROMIDE   | HL60 | 0.140419711 | 1 |
| ACENOCOUMAROL         | HL60 | 0.140510966 | 1 |
| NAFTOPIDIL            | HL60 | 0.140602266 | 1 |
| ZUCLOPENTHIXOL        | HL60 | 0.140693609 | 1 |
| IOXAGLIC ACID         | HL60 | 0.140784997 | 1 |
| FLUPENTIXOL           | HL60 | 0.140876429 | 1 |
| PRESTWICK-1103        | MCF7 | 0.140897218 | 1 |
| ALLANTOIN             | HL60 | 0.140967905 | 1 |
| GIBBERELIC ACID       | HL60 | 0.141059425 | 1 |
| ZOMEPIRAC             | HL60 | 0.14115099  | 1 |
| BRINZOLAMIDE          | MCF7 | 0.141156115 | 1 |
| GINKGOLIDE A          | HL60 | 0.141242599 | 1 |
| RISPERIDONE           | HL60 | 0.141334252 | 1 |
| SKIMMIANINE           | HL60 | 0.14142595  | 1 |
| CANTHARIDIN           | HL60 | 0.141517691 | 1 |
| TACRINE               | HL60 | 0.141609477 | 1 |
| ETOMIDATE             | HL60 | 0.141701308 | 1 |
| NAPELLINE             | HL60 | 0.141793182 | 1 |
| LAUDANOSINE           | HL60 | 0.141885101 | 1 |
| N-ACETYL-L-LEUCINE    | HL60 | 0.141977064 | 1 |
| TALAMPICILLIN         | HL60 | 0.142069072 | 1 |
| ETOFENAMATE           | HL60 | 0.142161124 | 1 |
| PRESTWICK-1083        | HL60 | 0.14225322  | 1 |
| LUTEOLIN              | HL60 | 0.142529775 | 1 |
| IMIPRAMINE            | HL60 | 0.142622049 | 1 |
| TUBOCURARINE CHLORIDE | HL60 | 0.142806729 | 1 |
| ZARDAVERINE           | HL60 | 0.142899136 | 1 |
| AMINOHIPURIC ACID     | HL60 | 0.143084083 | 1 |
| ISOXSUPRINE           | PC3  | 0.143109148 | 1 |
| CYANOCOBALAMIN        | HL60 | 0.143176624 | 1 |
| MOLINDONE             | HL60 | 0.143269208 | 1 |
| KINETIN               | HL60 | 0.143454511 | 1 |
| HYDROCOTARNINE        | HL60 | 0.143547229 | 1 |
| TROPICAMIDE           | HL60 | 0.143639992 | 1 |
| EPIRIZOLE             | HL60 | 0.143732799 | 1 |
| HESPERETIN            | PC3  | 0.1437646   | 1 |
| LETROZOLE             | HL60 | 0.14382565  | 1 |
| URAPIDIL              | HL60 | 0.144011487 | 1 |
| PF-01378883-00        | PC3  | 0.144158939 | 1 |



|                      |      |             |   |
|----------------------|------|-------------|---|
| PRONETALOL           | HL60 | 0.144290576 | 1 |
| CHRYSLIN             | HL60 | 0.144476858 | 1 |
| BEPRIDIL             | HL60 | 0.144570066 | 1 |
| REPAGLINIDE          | HL60 | 0.144663318 | 1 |
| BECLOMETASONE        | HL60 | 0.144756615 | 1 |
| NIFLUMIC ACID        | HL60 | 0.144849957 | 1 |
| METHAZOLAMIDE        | HL60 | 0.144943343 | 1 |
| PRESTWICK-664        | HL60 | 0.145223769 | 1 |
| METITEPINE           | HL60 | 0.145317334 | 1 |
| PYRVINIUM            | HL60 | 0.145410943 | 1 |
| CIPROFLOXACIN        | PC3  | 0.145479197 | 1 |
| PRESTWICK-665        | HL60 | 0.145504597 | 1 |
| BISOPROLOL           | HL60 | 0.145598296 | 1 |
| OUABAIN              | HL60 | 0.145692039 | 1 |
| METHYLDOPATE         | HL60 | 0.14587966  | 1 |
| HYMECROMONE          | MCF7 | 0.146009801 | 1 |
| VERTEPORFIN          | HL60 | 0.14606746  | 1 |
| MOXONIDINE           | HL60 | 0.146161427 | 1 |
| FLUNIXIN             | HL60 | 0.146255438 | 1 |
| HOMATROPINE          | PC3  | 0.146275639 | 1 |
| TRIAMTERENE          | HL60 | 0.146443596 | 1 |
| EPIVINCAMINE         | HL60 | 0.146537742 | 1 |
| PROMETHAZINE         | HL60 | 0.146726167 | 1 |
| PTHALYLSULFATHIAZOLE | HL60 | 0.146820448 | 1 |
| METHYLDOPA           | HL60 | 0.146914773 | 1 |
| SCOPOLETIN           | HL60 | 0.147009142 | 1 |
| OXOLINIC ACID        | HL60 | 0.147103557 | 1 |
| SULCONAZOLE          | HL60 | 0.147198016 | 1 |
| CHLORPROTHIXENE      | HL60 | 0.14729252  | 1 |
| SULFADIMIDINE        | HL60 | 0.147387069 | 1 |
| CEFALONIUM           | HL60 | 0.147481663 | 1 |
| SPAGLUMIC ACID       | HL60 | 0.147576302 | 1 |
| 6-BENZYLAMINOPURINE  | HL60 | 0.147670985 | 1 |
| NITRENDIPINE         | HL60 | 0.147765713 | 1 |
| PROMAZINE            | HL60 | 0.147860487 | 1 |
| DOXYCYCLINE          | HL60 | 0.147955305 | 1 |
| PROTRIPTYLINE        | HL60 | 0.148145076 | 1 |
| CEFUROXIME           | HL60 | 0.148240028 | 1 |
| VANOXERINE           | HL60 | 0.148430069 | 1 |
| AMINOGLUTETHIMIDE    | HL60 | 0.148525156 | 1 |
| MESALAZINE           | HL60 | 0.148620289 | 1 |
| PRESTWICK-1084       | MCF7 | 0.148684314 | 1 |
| BETHANECHOL          | HL60 | 0.148715466 | 1 |
| FAMPROFAZONE         | HL60 | 0.148810689 | 1 |
| THIOGUANOSINE        | HL60 | 0.148905956 | 1 |
| DIPHENYLPYRALINE     | HL60 | 0.149096625 | 1 |
| NETILMICIN           | HL60 | 0.149192028 | 1 |
| CICLOSPORIN          | HL60 | 0.149287475 | 1 |
| FLAVOXATE            | HL60 | 0.149382967 | 1 |
| PHENTOLAMINE         | HL60 | 0.149574087 | 1 |
| ISRADIPINE           | HL60 | 0.149765387 | 1 |
| ETYNODIOL            | HL60 | 0.149861104 | 1 |
| DIOXYBENZONE         | HL60 | 0.149956866 | 1 |
| CICLOPIROX           | HL60 | 0.150148526 | 1 |
| CONESSINE            | HL60 | 0.150244424 | 1 |
| CEFUROXIME           | MCF7 | 0.150306273 | 1 |
| TRIOXYSALIN          | HL60 | 0.150340367 | 1 |
| BUFEXAMAC            | HL60 | 0.150436355 | 1 |
| SITOSTEROL           | HL60 | 0.150532388 | 1 |
| LIOETHYRONINE        | HL60 | 0.150628466 | 1 |
| DIGOXIGENIN          | HL60 | 0.150724589 | 1 |

|                                |      |             |   |
|--------------------------------|------|-------------|---|
| BUSPIRONE                      | HL60 | 0.150820757 | 1 |
| TRIPROLIDINE                   | HL60 | 0.151013229 | 1 |
| LATAMOXEF                      | HL60 | 0.151109533 | 1 |
| YOHIMBIC ACID                  | HL60 | 0.151205882 | 1 |
| 0175029-0000                   | MCF7 | 0.151258411 | 1 |
| CINCHONIDINE                   | HL60 | 0.151302276 | 1 |
| BROMOPRIDE                     | HL60 | 0.151398715 | 1 |
| HYOSCYAMINE                    | HL60 | 0.151495199 | 1 |
| 16,16-DIMETHYLPROSTAGLANDIN E2 | PC3  | 0.151531264 | 1 |
| DIGITOXIGENIN                  | HL60 | 0.151591729 | 1 |
| REMOXIPRIDE                    | HL60 | 0.151688304 | 1 |
| RIMEXOLONE                     | HL60 | 0.151784924 | 1 |
| CEFOTAXIME                     | MCF7 | 0.151804478 | 1 |
| LEVOCABASTINE                  | HL60 | 0.151978299 | 1 |
| ANTIMYCIN A                    | HL60 | 0.152075055 | 1 |
| ESTRIOL                        | HL60 | 0.152171856 | 1 |
| CP-690334-01                   | PC3  | 0.15222458  | 1 |
| CISAPRIDE                      | HL60 | 0.152268702 | 1 |
| DIFLORASONE                    | HL60 | 0.152365593 | 1 |
| PICROTOXININ                   | HL60 | 0.152559512 | 1 |
| BUTIRO SIN                     | HL60 | 0.152656539 | 1 |
| MEROPENEM                      | HL60 | 0.152753612 | 1 |
| HELIOTRINE                     | HL60 | 0.152850729 | 1 |
| TREMORINE                      | HL60 | 0.152947893 | 1 |
| ACETAZOLAMIDE                  | HL60 | 0.153045101 | 1 |
| PENTETRAZOL                    | HL60 | 0.153142355 | 1 |
| CYCLOPENTOLATE                 | HL60 | 0.153239654 | 1 |
| RONIDAZOLE                     | HL60 | 0.153336998 | 1 |
| PHENAZOPYRIDINE                | HL60 | 0.153434388 | 1 |
| METAMIZOLE SODIUM              | HL60 | 0.153531823 | 1 |
| IDAZOXAN                       | HL60 | 0.153629303 | 1 |
| DICOUMAROL                     | HL60 | 0.153726829 | 1 |
| PANCURONIUM BROMIDE            | HL60 | 0.1538244   | 1 |
| FLUSPIRILENE                   | HL60 | 0.153922017 | 1 |
| NIRIDAZOLE                     | HL60 | 0.154117386 | 1 |
| METRIZAMIDE                    | MCF7 | 0.154141421 | 1 |
| PARACETAMOL                    | HL60 | 0.154215138 | 1 |
| TINIDAZOLE                     | HL60 | 0.15441078  | 1 |
| DEXPROPRANOLOL                 | HL60 | 0.154508669 | 1 |
| NAFTIDROFURYL                  | HL60 | 0.154606604 | 1 |
| OXAPROZIN                      | PC3  | 0.154695101 | 1 |
| PRESTWICK-674                  | HL60 | 0.154704583 | 1 |
| RETRORSINE                     | HL60 | 0.154900679 | 1 |
| DROPROPIZINE                   | HL60 | 0.154998796 | 1 |
| TOBRAMYCIN                     | HL60 | 0.155195164 | 1 |
| PIRIBEDIL                      | HL60 | 0.155293417 | 1 |
| CETIRIZINE                     | HL60 | 0.155391715 | 1 |
| RIBOSTAMYCIN                   | HL60 | 0.155490059 | 1 |
| LORGLUMIDE                     | HL60 | 0.155588448 | 1 |
| OXPRENOLOL                     | HL60 | 0.155785363 | 1 |
| DELSOLINE                      | HL60 | 0.155883889 | 1 |
| ETHOTOIN                       | HL60 | 0.156179739 | 1 |
| KETOTIFEN                      | HL60 | 0.156377201 | 1 |
| PYRANTEL                       | HL60 | 0.156476    | 1 |
| (-)-ATENOLOL                   | HL60 | 0.156673735 | 1 |
| CYCLOSERINE                    | HL60 | 0.156772671 | 1 |
| DESOXYCORTONE                  | HL60 | 0.156871652 | 1 |
| SULFANILAMIDE                  | HL60 | 0.156970679 | 1 |
| MEDRYSONE                      | HL60 | 0.15716887  | 1 |
| IOPANOIC ACID                  | HL60 | 0.157268034 | 1 |
| PARTHENOLIDE                   | HL60 | 0.157367244 | 1 |

|                     |      |             |   |
|---------------------|------|-------------|---|
| BEZAFIBRATE         | HL60 | 0.157466499 | 1 |
| PENTAMIDINE         | MCF7 | 0.157643169 | 1 |
| CANAVANINE          | HL60 | 0.157764539 | 1 |
| PRESTWICK-860       | HL60 | 0.157863977 | 1 |
| TRIFLUSAL           | HL60 | 0.157963461 | 1 |
| STAUROSPORINE       | MCF7 | 0.158045164 | 1 |
| FLUDROXYCORTIDE     | HL60 | 0.158062991 | 1 |
| MECLOZINE           | HL60 | 0.158162566 | 1 |
| AZLOCILLIN          | HL60 | 0.158262186 | 1 |
| RIBOFLAVIN          | HL60 | 0.158361853 | 1 |
| AMIODARONE          | HL60 | 0.158461565 | 1 |
| CARBAMAZEPINE       | HL60 | 0.158661127 | 1 |
| SELEGILINE          | HL60 | 0.158760976 | 1 |
| PAPAVERINE          | HL60 | 0.158860872 | 1 |
| EQUILIN             | HL60 | 0.158960813 | 1 |
| MEPHENESIN          | HL60 | 0.1590608   | 1 |
| DACARBAZINE         | HL60 | 0.159160832 | 1 |
| ALTIZIDE            | HL60 | 0.15926091  | 1 |
| LISINOPRIL          | HL60 | 0.159361035 | 1 |
| GUAIFENESIN         | HL60 | 0.159461205 | 1 |
| ETOFYLLINE          | HL60 | 0.15956142  | 1 |
| PIMOZIDE            | HL60 | 0.159661682 | 1 |
| HALCINONIDE         | HL60 | 0.159761989 | 1 |
| DIMENHYDRINATE      | HL60 | 0.159962742 | 1 |
| PIRENZEPINE         | HL60 | 0.160063187 | 1 |
| METACYCLINE         | HL60 | 0.160264214 | 1 |
| MYOSMINE            | HL60 | 0.160364796 | 1 |
| ESTRONE             | HL60 | 0.160465425 | 1 |
| TERAZOSIN           | MCF7 | 0.160739307 | 1 |
| BERBERINE           | HL60 | 0.160767585 | 1 |
| ELLIPTICINE         | HL60 | 0.160969255 | 1 |
| MINOXIDIL           | MCF7 | 0.161024552 | 1 |
| FLUTICASONE         | HL60 | 0.161070159 | 1 |
| BRINZOLAMIDE        | HL60 | 0.161171108 | 1 |
| FLUVASTATIN         | HL60 | 0.161272104 | 1 |
| ATOVAQUONE          | HL60 | 0.161373146 | 1 |
| CITIOLONE           | HL60 | 0.161474233 | 1 |
| TELENZEPINE         | HL60 | 0.161575367 | 1 |
| ACECLOFENAC         | PC3  | 0.161596144 | 1 |
| SUPROFEN            | HL60 | 0.161676546 | 1 |
| BENZYL PENICILLIN   | HL60 | 0.161777771 | 1 |
| METACYCLINE         | MCF7 | 0.161882491 | 1 |
| BENZAMIL            | HL60 | 0.16198036  | 1 |
| NIPECOTIC ACID      | HL60 | 0.162081723 | 1 |
| ORPHENADRINE        | HL60 | 0.162183133 | 1 |
| ACACETIN            | HL60 | 0.162284588 | 1 |
| ARTICAINE           | HL60 | 0.162386089 | 1 |
| MEMANTINE           | HL60 | 0.162487637 | 1 |
| TERCONAZOLE         | HL60 | 0.16258923  | 1 |
| TRICHLORMETHIAZIDE  | MCF7 | 0.16259997  | 1 |
| CEFACLOX            | HL60 | 0.162690869 | 1 |
| ALFAXALONE          | HL60 | 0.162792555 | 1 |
| ETHIONAMIDE         | HL60 | 0.162894286 | 1 |
| TESTOSTERONE        | HL60 | 0.162996064 | 1 |
| MAFENIDE            | MCF7 | 0.163175611 | 1 |
| PYRITHYLDIONE       | HL60 | 0.163199757 | 1 |
| NORETYNODREL        | HL60 | 0.163301672 | 1 |
| DIGOXIN             | HL60 | 0.163403634 | 1 |
| PHENYLPROPANOLAMINE | HL60 | 0.163505642 | 1 |
| OXANTEL             | HL60 | 0.163607696 | 1 |
| CHLORMEZANONE       | HL60 | 0.163709796 | 1 |

|                                 |      |             |   |
|---------------------------------|------|-------------|---|
| CINCHONINE                      | HL60 | 0.163914134 | 1 |
| DANTROLENE                      | HL60 | 0.164118657 | 1 |
| METOPROLOL                      | HL60 | 0.164425788 | 1 |
| SULFACETAMIDE                   | HL60 | 0.164528257 | 1 |
| PRAZOSIN                        | HL60 | 0.164630772 | 1 |
| TRAZODONE                       | HL60 | 0.164733333 | 1 |
| TIAPROFENIC ACID                | HL60 | 0.164835941 | 1 |
| CEFOTAXIME                      | HL60 | 0.164938594 | 1 |
| TICARCILLIN                     | HL60 | 0.165041294 | 1 |
| DYCLONINE                       | HL60 | 0.16514404  | 1 |
| THIOPROPERAZINE                 | HL60 | 0.165246833 | 1 |
| TRIDIHEXETHYL                   | HL60 | 0.165349671 | 1 |
| COLECALCIFEROL                  | HL60 | 0.165452556 | 1 |
| CLOMIPRAMINE                    | MCF7 | 0.165930058 | 1 |
| DIFENIDOL                       | HL60 | 0.165967673 | 1 |
| MINOCYCLINE                     | HL60 | 0.166070835 | 1 |
| BUMETANIDE                      | HL60 | 0.166174043 | 1 |
| METYRAPONE                      | HL60 | 0.166380599 | 1 |
| BICUCULLINE                     | HL60 | 0.166483946 | 1 |
| XYLAZINE                        | HL60 | 0.16658734  | 1 |
| 15(S)-15-METHYLPROSTAGLANDIN E2 | PC3  | 0.166660458 | 1 |
| LY-294002                       | MCF7 | 0.166813463 | 1 |
| CORALYNE                        | HL60 | 0.166897798 | 1 |
| METHANTHELINIUM BROMIDE         | MCF7 | 0.166953267 | 1 |
| CARBIMAZOLE                     | HL60 | 0.167001376 | 1 |
| TICLOPIDINE                     | HL60 | 0.167105001 | 1 |
| CLEBOPRIDE                      | HL60 | 0.167208673 | 1 |
| TETRAMISOLE                     | HL60 | 0.16731239  | 1 |
| PHENACETIN                      | MCF7 | 0.167393174 | 1 |
| VELNACRINE                      | HL60 | 0.167416154 | 1 |
| MEPHENTERMINE                   | PC3  | 0.167686908 | 1 |
| DOXAZOSIN                       | HL60 | 0.167727724 | 1 |
| OXYTETRACYCLINE                 | MCF7 | 0.167831674 | 1 |
| SULFAMETHOXAZOLE                | MCF7 | 0.167833915 | 1 |
| ETAMIVAN                        | HL60 | 0.167935669 | 1 |
| FOLIOSIDINE                     | HL60 | 0.168039711 | 1 |
| BERGENIN                        | PC3  | 0.1681438   | 1 |
| CLOFAZIMINE                     | HL60 | 0.168247935 | 1 |
| DENATONIUM BENZOATE             | MCF7 | 0.168275491 | 1 |
| ACEPROMAZINE                    | HL60 | 0.168352116 | 1 |
| OLIGOMYCIN                      | MCF7 | 0.168560618 | 1 |
| SULFAMETOXYDIAZINE              | HL60 | 0.168664938 | 1 |
| 3-ACETYLCOUMARIN                | HL60 | 0.168769305 | 1 |
| TERGURIDE                       | MCF7 | 0.168934854 | 1 |
| SULFAMETHOXYPYRIDAZINE          | HL60 | 0.168978178 | 1 |
| (+)-ISOPRENALINE                | MCF7 | 0.169161149 | 1 |
| PYRAZINAMIDE                    | HL60 | 0.169187237 | 1 |
| TRACAZOLATE                     | PC3  | 0.169291836 | 1 |
| PRESTWICK-675                   | HL60 | 0.169396482 | 1 |
| FENOPROFEN                      | HL60 | 0.169501174 | 1 |
| GALLAMINE TRIETHIODIDE          | HL60 | 0.169605912 | 1 |
| SULINDAC                        | HL60 | 0.169710697 | 1 |
| NEOSTIGMINE BROMIDE             | HL60 | 0.169815529 | 1 |
| CEFTAZIDIME                     | HL60 | 0.170130302 | 1 |
| IMIPENEM                        | HL60 | 0.170655854 | 1 |
| AMRINONE                        | HL60 | 0.170761104 | 1 |
| APOMORPHINE                     | HL60 | 0.1708664   | 1 |
| THIAMPHENICOL                   | MCF7 | 0.171091555 | 1 |
| PRESTWICK-1103                  | HL60 | 0.171182569 | 1 |
| CORTISONE                       | HL60 | 0.171288052 | 1 |
| BETAXOLOL                       | PC3  | 0.171710449 | 1 |

|                     |        |             |   |
|---------------------|--------|-------------|---|
| RAMIPRIL            | HL60   | 0.172133591 | 1 |
| LIDOCAINE           | HL60   | 0.172451438 | 1 |
| PROTOVERATRINE A    | HL60   | 0.17255748  | 1 |
| MEROPENEM           | MCF7   | 0.172587191 | 1 |
| FLURBIPROFEN        | HL60   | 0.172769704 | 1 |
| PHENSUXIMIDE        | HL60   | 0.172875886 | 1 |
| TYLOXAPOL           | HL60   | 0.17308839  | 1 |
| SULMAZOLE           | PC3    | 0.173194712 | 1 |
| KETOCONAZOLE        | HL60   | 0.173407496 | 1 |
| MECLOFENAMIC ACID   | HL60   | 0.173513958 | 1 |
| 6-AZATHYMINE        | HL60   | 0.173620466 | 1 |
| ADRENOSTERONE       | HL60   | 0.173727022 | 1 |
| BISACODYL           | HL60   | 0.173940273 | 1 |
| DROFENINE           | HL60   | 0.174046968 | 1 |
| PYRAZINAMIDE        | MCF7   | 0.174092157 | 1 |
| IFENPRODIL          | HL60   | 0.17415371  | 1 |
| ARCAINE             | HL60   | 0.174260499 | 1 |
| RESVERATROL         | HL60   | 0.174367335 | 1 |
| ETANIDAZOLE         | HL60   | 0.174688123 | 1 |
| ZALCITABINE         | HL60   | 0.174795146 | 1 |
| SUXIBUZONE          | HL60   | 0.174902215 | 1 |
| ENALAPRIL           | HL60   | 0.175009331 | 1 |
| ESCULIN             | MCF7   | 0.175151193 | 1 |
| BUTOCONAZOLE        | HL60   | 0.175223704 | 1 |
| PYRIMETHAMINE       | HL60   | 0.175330961 | 1 |
| ESCULETIN           | HL60   | 0.175438264 | 1 |
| MOXISYLYTE          | HL60   | 0.175545614 | 1 |
| PIVAMPICILLIN       | HL60   | 0.175760455 | 1 |
| SERTACONAZOLE       | HL60   | 0.175867946 | 1 |
| CLOPERASTINE        | HL60   | 0.175975483 | 1 |
| PEMPIDINE           | HL60   | 0.176190698 | 1 |
| HEXESTROL           | HL60   | 0.176298376 | 1 |
| R-ATENOLOL          | HL60   | 0.176406101 | 1 |
| CLOMIFENE           | HL60   | 0.176513873 | 1 |
| NIMESULIDE          | MCF7   | 0.17651955  | 1 |
| AMPROLIUM           | HL60   | 0.176621691 | 1 |
| TRICHLORMETHIAZIDE  | HL60   | 0.176729556 | 1 |
| IOVERSOL            | MCF7   | 0.17682466  | 1 |
| CEFOTETAN           | HL60   | 0.176837469 | 1 |
| GOSSYPOL            | HL60   | 0.176945428 | 1 |
| PRESTWICK-664       | PC3    | 0.177130145 | 1 |
| PF-00562151-00      | MCF7   | 0.177226827 | 1 |
| WORTMANNIN          | SKMEL5 | 0.177269586 | 1 |
| ANABASINE           | HL60   | 0.177377733 | 1 |
| MECLOFENOXATE       | PC3    | 0.177589075 | 1 |
| DEXPANTHENOL        | HL60   | 0.177594166 | 1 |
| PIPENZOLATE BROMIDE | HL60   | 0.177702454 | 1 |
| LABETALOL           | HL60   | 0.177919169 | 1 |
| DOXEPIN             | HL60   | 0.178136072 | 1 |
| HELVETICOSIDE       | HL60   | 0.178244594 | 1 |
| NIFURTIMOX          | PC3    | 0.178353162 | 1 |
| COLFORSIN           | HL60   | 0.178679151 | 1 |
| CHLORPHENESIN       | HL60   | 0.178787907 | 1 |
| GRAMINE             | HL60   | 0.178896711 | 1 |
| NIFUROXAZIDE        | HL60   | 0.179005561 | 1 |
| LANATOSIDE C        | HL60   | 0.179114459 | 1 |
| INDOMETACIN         | HL60   | 0.179332395 | 1 |
| GLICLAZIDE          | HL60   | 0.179441433 | 1 |
| FLUVASTATIN         | PC3    | 0.179550519 | 1 |
| TOLBUTAMIDE         | HL60   | 0.17976883  | 1 |
| FLUNISOLIDE         | HL60   | 0.179878057 | 1 |

|                      |      |             |   |
|----------------------|------|-------------|---|
| FLUOROCURARINE       | HL60 | 0.17998733  | 1 |
| OXYBUPROCAINE        | HL60 | 0.180315433 | 1 |
| DILTIAZEM            | HL60 | 0.180424894 | 1 |
| ENOXACIN             | MCF7 | 0.180515262 | 1 |
| NICOTINIC ACID       | PC3  | 0.180534403 | 1 |
| ECONAZOLE            | HL60 | 0.180643959 | 1 |
| DICLOFENAMIDE        | HL60 | 0.180753561 | 1 |
| NIFEDIPINE           | HL60 | 0.180863211 | 1 |
| PRESTWICK-689        | HL60 | 0.180972908 | 1 |
| DL-ALPHA TOCOPHEROL  | PC3  | 0.181082652 | 1 |
| CHLORTALIDONE        | HL60 | 0.181302281 | 1 |
| PIPERACETAZINE       | HL60 | 0.181412166 | 1 |
| OMEPRAZOLE           | HL60 | 0.181742104 | 1 |
| EPITIOSTANOL         | HL60 | 0.181852177 | 1 |
| DEMECLOCYCLINE       | HL60 | 0.181962298 | 1 |
| CARBACHOL            | HL60 | 0.182072466 | 1 |
| DEQUALINIUM CHLORIDE | PC3  | 0.18218268  | 1 |
| ROLIPRAM             | HL60 | 0.182292942 | 1 |
| OXYPHENBUTAZONE      | HL60 | 0.182513607 | 1 |
| EBSELEN              | HL60 | 0.182734461 | 1 |
| HARPAGOSIDE          | HL60 | 0.182844959 | 1 |
| METRIFONATE          | HL60 | 0.182955503 | 1 |
| 1,4-CHRYSENEQUINONE  | HL60 | 0.183066095 | 1 |
| SOTALOL              | MCF7 | 0.18316222  | 1 |
| PHENACETIN           | HL60 | 0.18328742  | 1 |
| ZIMELDINE            | HL60 | 0.183619762 | 1 |
| VITEXIN              | MCF7 | 0.183632158 | 1 |
| SC-560               | PC3  | 0.183730637 | 1 |
| ETHOXYQUIN           | MCF7 | 0.183788993 | 1 |
| BENSERAZIDE          | PC3  | 0.183841559 | 1 |
| FLUVASTATIN          | MCF7 | 0.183945923 | 1 |
| RIFABUTIN            | PC3  | 0.184285719 | 1 |
| (-)-ISOPRENALINE     | MCF7 | 0.184417277 | 1 |
| CEFAPIRIN            | HL60 | 0.184508082 | 1 |
| SULFAFURAZOLE        | MCF7 | 0.184637626 | 1 |
| ISOETARINE           | PC3  | 0.184953376 | 1 |
| TERGURIDE            | PC3  | 0.185047071 | 1 |
| AH-23848             | PC3  | 0.185176306 | 1 |
| MIDECAMYCIN          | HL60 | 0.185287841 | 1 |
| ANISOMYCIN           | HL60 | 0.185622732 | 1 |
| PEPSTATIN            | HL60 | 0.185846229 | 1 |
| PREDNICARBATE        | PC3  | 0.185958049 | 1 |
| CLIDINIUM BROMIDE    | HL60 | 0.186069916 | 1 |
| CAPSAICIN            | HL60 | 0.186293791 | 1 |
| BUFLOMEDIL           | HL60 | 0.186405799 | 1 |
| PHENFORMIN           | HL60 | 0.186517855 | 1 |
| RIBAVIRIN            | HL60 | 0.186742109 | 1 |
| CLOXACILLIN          | HL60 | 0.187191183 | 1 |
| LINCOMYCIN           | HL60 | 0.18730357  | 1 |
| HEMICHOLINIUM        | HL60 | 0.187416005 | 1 |
| FIPEXIDE             | MCF7 | 0.187641015 | 1 |
| LANSOPRAZOLE         | PC3  | 0.187753592 | 1 |
| TIOGUANINE           | MCF7 | 0.187866215 | 1 |
| PRESTWICK-1100       | PC3  | 0.187899868 | 1 |
| NICLOSAMIDE          | HL60 | 0.188091605 | 1 |
| BETAHISTINE          | MCF7 | 0.188218738 | 1 |
| BETA-ESCIN           | HL60 | 0.188317183 | 1 |
| CLINDAMYCIN          | HL60 | 0.188655907 | 1 |
| CEFAMANDOLE          | MCF7 | 0.188857615 | 1 |
| BIOTIN               | PC3  | 0.188881959 | 1 |
| NORCYCLOBENZAPRINE   | HL60 | 0.188995056 | 1 |

|                              |      |             |   |
|------------------------------|------|-------------|---|
| SIMVASTATIN                  | MCF7 | 0.189177623 | 1 |
| ASCORBIC ACID                | HL60 | 0.189334633 | 1 |
| (-)-MK-801                   | HL60 | 0.189447919 | 1 |
| BETAHISTINE                  | HL60 | 0.189561254 | 1 |
| QUINIDINE                    | MCF7 | 0.189658345 | 1 |
| BUTACAINE                    | HL60 | 0.189901541 | 1 |
| BOLDINE                      | PC3  | 0.190015065 | 1 |
| FOSFOSAL                     | HL60 | 0.190242255 | 1 |
| FLORFENICOL                  | HL60 | 0.190355921 | 1 |
| GINKGOLIDE A                 | PC3  | 0.190469635 | 1 |
| ALIMEMAZINE                  | HL60 | 0.190583396 | 1 |
| DIETHYLCARBAMAZINE           | HL60 | 0.191152913 | 1 |
| SANTONIN                     | MCF7 | 0.191266918 | 1 |
| HARMINE                      | HL60 | 0.191266959 | 1 |
| PENTOXYVERINE                | HL60 | 0.191381052 | 1 |
| CANADINE                     | PC3  | 0.191495193 | 1 |
| AMRINONE                     | PC3  | 0.191723617 | 1 |
| RACECADOTRIL                 | HL60 | 0.1918379   | 1 |
| PIROMIDIC ACID               | MCF7 | 0.191913005 | 1 |
| AMIPRILOSE                   | HL60 | 0.191952231 | 1 |
| CEFALEXIN                    | HL60 | 0.192295507 | 1 |
| FENSPIRIDE                   | HL60 | 0.192410028 | 1 |
| FLORFENICOL                  | PC3  | 0.192524596 | 1 |
| ORCIPRENALINE                | HL60 | 0.193098149 | 1 |
| LYMECYCLINE                  | PC3  | 0.193213003 | 1 |
| HARMALINE                    | HL60 | 0.193442852 | 1 |
| BROMPERIDOL                  | HL60 | 0.193557848 | 1 |
| LYCORINE                     | HL60 | 0.193672891 | 1 |
| LATAMOXEF                    | PC3  | 0.194018306 | 1 |
| BENPERIDOL                   | HL60 | 0.194248821 | 1 |
| CHLOROPYRAZINE               | HL60 | 0.194364149 | 1 |
| METHYLBENZETHONIUM CHLORIDE  | HL60 | 0.194479526 | 1 |
| AMYLOCAINE                   | MCF7 | 0.194512559 | 1 |
| EDROPHONIUM CHLORIDE         | PC3  | 0.194675839 | 1 |
| PARGYLINE                    | HL60 | 0.194710421 | 1 |
| ROXITHROMYCIN                | HL60 | 0.19482594  | 1 |
| MEFLOQUINE                   | HL60 | 0.19505712  | 1 |
| BENZATHINE BENZYL PENICILLIN | HL60 | 0.195172782 | 1 |
| DIPERODON                    | PC3  | 0.195288491 | 1 |
| CHLORPHENESIN                | PC3  | 0.195404248 | 1 |
| CEFORANIDE                   | PC3  | 0.195635905 | 1 |
| ROLITETRACYCLINE             | HL60 | 0.195751804 | 1 |
| CAFFEIC ACID                 | HL60 | 0.195867751 | 1 |
| MESTRANOL                    | HL60 | 0.195983746 | 1 |
| SCOPOLAMINE N-OXIDE          | HL60 | 0.196215879 | 1 |
| SIMVASTATIN                  | HL60 | 0.196332016 | 1 |
| PENTOXYVERINE                | PC3  | 0.196448202 | 1 |
| ELDELINE                     | HL60 | 0.196564435 | 1 |
| MS-275                       | PC3  | 0.19664263  | 1 |
| RIMEXOLONE                   | PC3  | 0.196680715 | 1 |
| TRIFLUOPERAZINE              | HL60 | 0.19675601  | 1 |
| ACEBUTOLOL                   | MCF7 | 0.196807148 | 1 |
| PERHEXILINE                  | HL60 | 0.197029843 | 1 |
| QUINETHAZONE                 | MCF7 | 0.197796259 | 1 |
| NISOXETINE                   | HL60 | 0.197962945 | 1 |
| 3-ACETAMIDOCUMARIN           | HL60 | 0.198079798 | 1 |
| DL-ALPHA TOCOPHEROL          | MCF7 | 0.198292101 | 1 |
| CICLOHEXIMIDE                | HL60 | 0.198430641 | 1 |
| NORETYNODREL                 | PC3  | 0.198547684 | 1 |
| SULFAMETHOXYPYRIDAZINE       | MCF7 | 0.198886497 | 1 |
| ROFECOXIB                    | PC3  | 0.199016332 | 1 |

|                       |        |             |   |
|-----------------------|--------|-------------|---|
| MEPRYLCAINE           | PC3    | 0.199133614 | 1 |
| METOCLOPRAMIDE        | HL60   | 0.199368319 | 1 |
| PREDNISONE            | MCF7   | 0.199452405 | 1 |
| NITROFURANTOIN        | HL60   | 0.199485744 | 1 |
| MERCAPTOPURINE        | MCF7   | 0.199603216 | 1 |
| THIOPERAMIDE          | HL60   | 0.200191293 | 1 |
| DEXTROMETHORPHAN      | HL60   | 0.200309051 | 1 |
| NORFLOXACIN           | PC3    | 0.200450671 | 1 |
| FLUNARIZINE           | HL60   | 0.200544711 | 1 |
| NARINGIN              | PC3    | 0.200780562 | 1 |
| FLUOROMETHOLONE       | HL60   | 0.200898559 | 1 |
| SODIUM PHENYLBUTYRATE | SKMEL5 | 0.201016604 | 1 |
| PALMATINE             | HL60   | 0.201134696 | 1 |
| CHENODEOXYCHOLIC ACID | HL60   | 0.201252837 | 1 |
| NORTRIPTYLINE         | HL60   | 0.20148926  | 1 |
| IOPAMIDOL             | HL60   | 0.201607544 | 1 |
| IOVERSOL              | HL60   | 0.202081156 | 1 |
| DIAZOXIDE             | HL60   | 0.202199678 | 1 |
| AG-013608             | MCF7   | 0.202396426 | 1 |
| RESERPINE             | HL60   | 0.203268528 | 1 |
| PRESTWICK-642         | HL60   | 0.203625671 | 1 |
| HEXETIDINE            | PC3    | 0.203864006 | 1 |
| SULFAMERAZINE         | HL60   | 0.203983245 | 1 |
| MICONAZOLE            | HL60   | 0.204221866 | 1 |
| BETHANECHOL           | MCF7   | 0.20430921  | 1 |
| RIFAMPICIN            | HL60   | 0.204580157 | 1 |
| TRIMETAZIDINE         | HL60   | 0.204699682 | 1 |
| FLURBIPROFEN          | PC3    | 0.204819256 | 1 |
| DIHYDROERGOCRISTINE   | MCF7   | 0.204985422 | 1 |
| CARISOPRODOL          | PC3    | 0.205058547 | 1 |
| AMINOGLUTETHIMIDE     | MCF7   | 0.205154714 | 1 |
| GRISEOFULVIN          | PC3    | 0.205493585 | 1 |
| ESCULIN               | HL60   | 0.205777566 | 1 |
| PROADIFEN             | HL60   | 0.20589757  | 1 |
| CYPROHEPTADINE        | HL60   | 0.206017622 | 1 |
| QUINISOCAINE          | HL60   | 0.206378065 | 1 |
| SUCCINYLSULFATHIAZOLE | HL60   | 0.206618599 | 1 |
| MEXILETINE            | HL60   | 0.206859324 | 1 |
| METIXENE              | HL60   | 0.206979759 | 1 |
| ETHAVERINE            | HL60   | 0.207220772 | 1 |
| URSODEOXYCHOLIC ACID  | HL60   | 0.207461976 | 1 |
| EPIANDROSTERONE       | HL60   | 0.207703371 | 1 |
| MEPHENYTOIN           | PC3    | 0.207824141 | 1 |
| MONORDEN              | HL60   | 0.207905136 | 1 |
| ETILEFRINE            | HL60   | 0.208549763 | 1 |
| FUSARIC ACID          | HL60   | 0.208792021 | 1 |
| SODIUM PHENYLBUTYRATE | MCF7   | 0.20879742  | 1 |
| CARMUSTINE            | PC3    | 0.208913221 | 1 |
| DIGOXIGENIN           | PC3    | 0.209155765 | 1 |
| DOPAMINE              | MCF7   | 0.20927711  | 1 |
| PROGESTERONE          | HL60   | 0.209641429 | 1 |
| INDAPAMIDE            | HL60   | 0.209762965 | 1 |
| N6-METHYLADENOSINE    | HL60   | 0.209884548 | 1 |
| TETRACYCLINE          | PC3    | 0.210105817 | 1 |
| PIVMECILLINAM         | HL60   | 0.210127859 | 1 |
| AH-23848              | MCF7   | 0.210277981 | 1 |
| PHENELZINE            | MCF7   | 0.210692537 | 1 |
| NORETHISTERONE        | HL60   | 0.210736974 | 1 |
| AZACYCLONOL           | HL60   | 0.211225128 | 1 |
| GUANADREL             | MCF7   | 0.211312978 | 1 |
| METHYLPREDNISOLONE    | HL60   | 0.211714049 | 1 |



|                             |        |             |   |
|-----------------------------|--------|-------------|---|
| DEBRISOQUINE                | HL60   | 0.211958797 | 1 |
| METFORMIN                   | PC3    | 0.212004892 | 1 |
| MORACIZINE                  | HL60   | 0.212326278 | 1 |
| INDAPAMIDE                  | PC3    | 0.212698341 | 1 |
| HARMINE                     | PC3    | 0.212816924 | 1 |
| ZIDOVUDINE                  | PC3    | 0.212939705 | 1 |
| BIOTIN                      | HL60   | 0.213062534 | 1 |
| CIPROFIBRATE                | PC3    | 0.21343131  | 1 |
| AG-012559                   | PC3    | 0.213567308 | 1 |
| DIMETHADIONE                | PC3    | 0.213923681 | 1 |
| DIENESTROL                  | PC3    | 0.214170154 | 1 |
| SELEGILINE                  | MCF7   | 0.214613233 | 1 |
| 0179445-0000                | PC3    | 0.214748172 | 1 |
| LOBELINE                    | HL60   | 0.214787177 | 1 |
| 0198306-0000                | MCF7   | 0.215137491 | 1 |
| TACRINE                     | PC3    | 0.215157965 | 1 |
| DEPTROPINE                  | HL60   | 0.215281657 | 1 |
| TROGLITAZONE                | MCF7   | 0.215636615 | 1 |
| PROFENAMINE                 | HL60   | 0.215653021 | 1 |
| TIABENDAZOLE                | MCF7   | 0.215837843 | 1 |
| FLUCYTOSINE                 | PC3    | 0.216148845 | 1 |
| ISOSORBIDE                  | MCF7   | 0.216188595 | 1 |
| CEFOXITIN                   | HL60   | 0.216272921 | 1 |
| ACONITINE                   | HL60   | 0.216397044 | 1 |
| PYRAZINAMIDE                | PC3    | 0.216521216 | 1 |
| BISACODYL                   | MCF7   | 0.216539731 | 1 |
| KANAMYCIN                   | PC3    | 0.216645436 | 1 |
| EMETINE                     | MCF7   | 0.216715442 | 1 |
| BEPHENIUM HYDROXYNAPHTHOATE | HL60   | 0.216894019 | 1 |
| BENZATHINE BENZYLPENICILLIN | PC3    | 0.217267253 | 1 |
| TRIFLURIDINE                | HL60   | 0.217516316 | 1 |
| 7-AMINOCEPHALOSPORANIC ACID | MCF7   | 0.21759544  | 1 |
| GELSEMINE                   | MCF7   | 0.21794811  | 1 |
| MILRINONE                   | PC3    | 0.218139812 | 1 |
| TROGLITAZONE                | HL60   | 0.218226087 | 1 |
| CINNARIZINE                 | HL60   | 0.218264656 | 1 |
| SULFAMONOMETHOXINE          | HL60   | 0.218389547 | 1 |
| TRICHOSTATIN A              | ssMCF7 | 0.218514486 | 1 |
| S-PROPRANOLOL               | HL60   | 0.218639473 | 1 |
| VIDARABINE                  | PC3    | 0.218764508 | 1 |
| TANESPIMYCIN                | SKMEL5 | 0.219014722 | 1 |
| EXISULIND                   | MCF7   | 0.21918548  | 1 |
| PHTHALYLSULFATHIAZOLE       | PC3    | 0.219265128 | 1 |
| LEVCYCLOSERINE              | PC3    | 0.220072194 | 1 |
| KHELLIN                     | HL60   | 0.220394329 | 1 |
| TOLAZAMIDE                  | HL60   | 0.220520036 | 1 |
| EMETINE                     | PC3    | 0.220771593 | 1 |
| PHENIRAMINE                 | PC3    | 0.220783292 | 1 |
| DENATONIUM BENZOATE         | HL60   | 0.221653555 | 1 |
| PREDNISOLONE                | HL60   | 0.221779741 | 1 |
| PROXYPHYLLINE               | HL60   | 0.222032258 | 1 |
| MEPTAZINOL                  | PC3    | 0.222284967 | 1 |
| DOMPERIDONE                 | HL60   | 0.222411393 | 1 |
| FENOFIBRATE                 | HL60   | 0.22279096  | 1 |
| DEXPANTHENOL                | PC3    | 0.222917578 | 1 |
| PROXYMETACAINE              | HL60   | 0.223297721 | 1 |
| AMPROLIUM                   | MCF7   | 0.223463588 | 1 |
| HECOGENIN                   | HL60   | 0.223551389 | 1 |
| SPIRONOLACTONE              | HL60   | 0.223678296 | 1 |
| PICOTAMIDE                  | HL60   | 0.22380525  | 1 |
| NS-398                      | MCF7   | 0.224361819 | 1 |

|                       |        |             |   |
|-----------------------|--------|-------------|---|
| PHENAZONE             | HL60   | 0.22444074  | 1 |
| SULFINPYRAZONE        | HL60   | 0.224567982 | 1 |
| FLUMETASONE           | PC3    | 0.224721783 | 1 |
| PROGLUMIDE            | HL60   | 0.22482261  | 1 |
| PRESTWICK-1084        | PC3    | 0.22507743  | 1 |
| TIAPRIDE              | MCF7   | 0.225623373 | 1 |
| BUTYL HYDROXYBENZOATE | HL60   | 0.225715319 | 1 |
| SISOMICIN             | PC3    | 0.225843041 | 1 |
| FLUMETASONE           | HL60   | 0.225970811 | 1 |
| BUCLADESINE           | HL60   | 0.226482369 | 1 |
| INDOMETACIN           | MCF7   | 0.226572911 | 1 |
| ALVESPIMYCIN          | PC3    | 0.226708448 | 1 |
| THEOPHYLLINE          | HL60   | 0.226738437 | 1 |
| DL-PPMP               | MCF7   | 0.22750779  | 1 |
| METHYLPREDNISOLONE    | MCF7   | 0.228342538 | 1 |
| FENDILINE             | HL60   | 0.228793883 | 1 |
| MESORIDAZINE          | PC3    | 0.228922756 | 1 |
| SULFADIAZINE          | HL60   | 0.229051677 | 1 |
| SULFAGUANIDINE        | MCF7   | 0.229253724 | 1 |
| MESALAZINE            | PC3    | 0.229309663 | 1 |
| ETIFENIN              | HL60   | 0.229438728 | 1 |
| RISPERIDONE           | MCF7   | 0.229984399 | 1 |
| IOCETAMIC ACID        | PC3    | 0.230343525 | 1 |
| LINCOMYCIN            | MCF7   | 0.230533413 | 1 |
| XAMOTEROL             | HL60   | 0.23060247  | 1 |
| TETRANDRINE           | PC3    | 0.230861607 | 1 |
| NEOSTIGMINE BROMIDE   | PC3    | 0.231120936 | 1 |
| TOCAINIDE             | HL60   | 0.231640169 | 1 |
| PRESTWICK-1082        | MCF7   | 0.232369694 | 1 |
| CALCIUM PANTOTHENATE  | HL60   | 0.232420457 | 1 |
| AZATHIOPRINE          | PC3    | 0.23255385  | 1 |
| ERGOCALCIFEROL        | HL60   | 0.232941607 | 1 |
| DORZOLAMIDE           | HL60   | 0.233463525 | 1 |
| HARMOL                | HL60   | 0.233594124 | 1 |
| HALOFANTRINE          | MCF7   | 0.233660797 | 1 |
| CEFTAZIDIME           | PC3    | 0.23398621  | 1 |
| GRAMINE               | PC3    | 0.234247839 | 1 |
| TOLNAFTATE            | HL60   | 0.234378726 | 1 |
| TICLOPIDINE           | MCF7   | 0.234956598 | 1 |
| YOHIMBINE             | HL60   | 0.235033879 | 1 |
| ANTAZOLINE            | MCF7   | 0.235142095 | 1 |
| PNU-0293363           | MCF7   | 0.235427545 | 1 |
| MEPACRINE             | HL60   | 0.235558863 | 1 |
| ATRACURIUM BESILATE   | PC3    | 0.235821643 | 1 |
| RICININE              | PC3    | 0.235953105 | 1 |
| SULFAGUANIDINE        | HL60   | 0.236216172 | 1 |
| AMIPRILOSE            | MCF7   | 0.236257094 | 1 |
| BERGENIN              | MCF7   | 0.236815887 | 1 |
| MONOCROTALINE         | MCF7   | 0.237002343 | 1 |
| STAUROSPORINE         | SKMEL5 | 0.237138416 | 1 |
| SULFADIAZINE          | MCF7   | 0.237188895 | 1 |
| ETODOLAC              | HL60   | 0.237270356 | 1 |
| ACEBUTOLOL            | HL60   | 0.237402345 | 1 |
| PRESTWICK-920         | PC3    | 0.237534381 | 1 |
| NICLOSAMIDE           | PC3    | 0.237749125 | 1 |
| IOPROMIDE             | HL60   | 0.237798598 | 1 |
| NIFURTIMOX            | HL60   | 0.238063006 | 1 |
| KETANSERIN            | MCF7   | 0.238123091 | 1 |
| ACETYLSALICYLIC ACID  | HL60   | 0.238218756 | 1 |
| PENTAMIDINE           | HL60   | 0.238459977 | 1 |
| BUPROPION             | MCF7   | 0.238684757 | 1 |

|                             |        |             |   |
|-----------------------------|--------|-------------|---|
| DIFLORASONE                 | PC3    | 0.238989942 | 1 |
| PRENYLAMINE                 | PC3    | 0.239122553 | 1 |
| SOLASODINE                  | HL60   | 0.239255212 | 1 |
| LOXAPINE                    | HL60   | 0.239520673 | 1 |
| PIROXICAM                   | PC3    | 0.239653475 | 1 |
| ISOCONAZOLE                 | HL60   | 0.239919223 | 1 |
| MEBHYDROLIN                 | MCF7   | 0.239998663 | 1 |
| DIGITOXIGENIN               | MCF7   | 0.240374926 | 1 |
| ROLITETRACYCLINE            | MCF7   | 0.240563201 | 1 |
| CEFALONIUM                  | PC3    | 0.240850849 | 1 |
| FUSARIC ACID                | MCF7   | 0.240940039 | 1 |
| AMINOCAPROIC ACID           | HL60   | 0.24098413  | 1 |
| CEFORANIDE                  | HL60   | 0.241117458 | 1 |
| CLOMIFENE                   | MCF7   | 0.241506012 | 1 |
| OXYBUPROCAINE               | PC3    | 0.241651251 | 1 |
| 6-AZATHYMINE                | PC3    | 0.241918434 | 1 |
| METHYLPREDNISOLONE          | PC3    | 0.242052097 | 1 |
| PIROMIDIC ACID              | HL60   | 0.242587229 | 1 |
| SISOMICIN                   | HL60   | 0.242855081 | 1 |
| PRESTWICK-682               | PC3    | 0.242989079 | 1 |
| NIZATIDINE                  | PC3    | 0.243123125 | 1 |
| DEXTROMETHORPHAN            | MCF7   | 0.243398807 | 1 |
| AZAPERONE                   | HL60   | 0.243525549 | 1 |
| PRESTWICK-1080              | PC3    | 0.243588613 | 1 |
| ERASTIN                     | PC3    | 0.243778514 | 1 |
| LANATOSIDE C                | PC3    | 0.24434879  | 1 |
| NADIDE                      | PC3    | 0.244600782 | 1 |
| EUCATROPINE                 | HL60   | 0.245274355 | 1 |
| TONZONIUM BROMIDE           | HL60   | 0.245814073 | 1 |
| CYCLIZINE                   | HL60   | 0.245949122 | 1 |
| ACETAZOLAMIDE               | PC3    | 0.246354555 | 1 |
| PRESTWICK-674               | MCF7   | 0.246563045 | 1 |
| ORPHENADRINE                | PC3    | 0.247021448 | 1 |
| AMIKACIN                    | HL60   | 0.24743781  | 1 |
| SULFAPYRIDINE               | HL60   | 0.247573431 | 1 |
| SALSOLIDIN                  | MCF7   | 0.247596595 | 1 |
| SIROLIMUS                   | ssMCF7 | 0.247844817 | 1 |
| CHLOROQUINE                 | MCF7   | 0.2481726   | 1 |
| GABEXATE                    | MCF7   | 0.248557081 | 1 |
| METANEPHRINE                | MCF7   | 0.248749464 | 1 |
| MIMOSINE                    | PC3    | 0.248796171 | 1 |
| PREGNENOLONE                | PC3    | 0.24893227  | 1 |
| PROPRANOLOL                 | HL60   | 0.249068416 | 1 |
| PROPYLTHIOURACIL            | HL60   | 0.249204609 | 1 |
| N6-METHYLADENOSINE          | PC3    | 0.24947714  | 1 |
| VALINOMYCIN                 | PC3    | 0.250098818 | 1 |
| BAS-012416453               | PC3    | 0.2501593   | 1 |
| URAPIDIL                    | PC3    | 0.250295875 | 1 |
| IDOXURIDINE                 | MCF7   | 0.250678542 | 1 |
| PARACETAMOL                 | PC3    | 0.250979464 | 1 |
| RICININE                    | HL60   | 0.251664244 | 1 |
| CP-320650-01                | MCF7   | 0.251767625 | 1 |
| AZLOCILLIN                  | PC3    | 0.252212925 | 1 |
| PRESTWICK-1084              | HL60   | 0.252350214 | 1 |
| OXANTEL                     | PC3    | 0.252762367 | 1 |
| 7-AMINOCEPHALOSPORANIC ACID | HL60   | 0.253037374 | 1 |
| MENADIONE                   | PC3    | 0.253174948 | 1 |
| OXOLAMINE                   | HL60   | 0.25331257  | 1 |
| ALPHA-YOHIMBINE             | MCF7   | 0.253395255 | 1 |
| 0175029-0000                | PC3    | 0.253416788 | 1 |
| SEROTONIN                   | HL60   | 0.253725722 | 1 |

|                        |      |             |   |
|------------------------|------|-------------|---|
| ZARDAVERINE            | PC3  | 0.254139302 | 1 |
| CARBINOXAMINE          | HL60 | 0.254691408 | 1 |
| ISONIAZID              | HL60 | 0.254829553 | 1 |
| PERGOLIDE              | HL60 | 0.254967745 | 1 |
| BUCLADESINE            | PC3  | 0.255244273 | 1 |
| QUERCETIN              | HL60 | 0.255797899 | 1 |
| GRISEOFULVIN           | MCF7 | 0.255934613 | 1 |
| PRESTWICK-920          | HL60 | 0.256213617 | 1 |
| PRIDINOL               | HL60 | 0.256352284 | 1 |
| 0316684-0000           | MCF7 | 0.256522899 | 1 |
| STROPHANTHIDIN         | HL60 | 0.256629762 | 1 |
| H-89                   | PC3  | 0.256719184 | 1 |
| PF-00539758-00         | MCF7 | 0.256907429 | 1 |
| PNU-0251126            | MCF7 | 0.25711204  | 1 |
| FENBENDAZOLE           | HL60 | 0.257324287 | 1 |
| CANAVANINE             | PC3  | 0.257463334 | 1 |
| TRIMETHADIONE          | HL60 | 0.258019997 | 1 |
| DANTROLENE             | PC3  | 0.258095839 | 1 |
| DEHYDROCHOLIC ACID     | HL60 | 0.258437993 | 1 |
| NALIDIXIC ACID         | PC3  | 0.258687257 | 1 |
| FURAZOLIDONE           | PC3  | 0.258716894 | 1 |
| ISOCONAZOLE            | PC3  | 0.258884586 | 1 |
| PIROXICAM              | MCF7 | 0.259477142 | 1 |
| THIOSTREPTON           | PC3  | 0.259694539 | 1 |
| ROXITHROMYCIN          | MCF7 | 0.259872653 | 1 |
| CARBENOXOLONE          | PC3  | 0.260254236 | 1 |
| MEPACRINE              | MCF7 | 0.260394278 | 1 |
| MEGLUMINE              | MCF7 | 0.260664811 | 1 |
| RETRORSINE             | PC3  | 0.261375902 | 1 |
| AZTREONAM              | HL60 | 0.261656791 | 1 |
| WORTMANNIN             | MCF7 | 0.261690506 | 1 |
| HOMOCHLORCYCLIZINE     | PC3  | 0.261797307 | 1 |
| 8-AZAGUANINE           | PC3  | 0.26193787  | 1 |
| BUTYL HYDROXYBENZOATE  | PC3  | 0.262359843 | 1 |
| PRESTWICK-864          | MCF7 | 0.262851057 | 1 |
| SULOCTIDIL             | PC3  | 0.263064077 | 1 |
| 0173570-0000           | PC3  | 0.263455402 | 1 |
| CLOBETASOL             | PC3  | 0.263487185 | 1 |
| BAMBUTEROL             | PC3  | 0.263910717 | 1 |
| NALOXONE               | PC3  | 0.264048377 | 1 |
| ETHOXYQUIN             | HL60 | 0.264051989 | 1 |
| BISACODYL              | PC3  | 0.264193308 | 1 |
| LEVOTHYROXINE SODIUM   | MCF7 | 0.26444824  | 1 |
| TIAPRIDE               | HL60 | 0.264900612 | 1 |
| CO-DERGOCRINE MESILATE | HL60 | 0.265183864 | 1 |
| LOXAPINE               | MCF7 | 0.265449548 | 1 |
| METHOXAMINE            | HL60 | 0.266176732 | 1 |
| ETIFENIN               | PC3  | 0.266318759 | 1 |
| FAMOTIDINE             | MCF7 | 0.266654232 | 1 |
| LYNESTRENOL            | HL60 | 0.266745122 | 1 |
| CROMOGLICIC ACID       | PC3  | 0.267599121 | 1 |
| METRIFONATE            | PC3  | 0.267660727 | 1 |
| SITOSTEROL             | PC3  | 0.267741619 | 1 |
| BUTOCONAZOLE           | MCF7 | 0.267862308 | 1 |
| MELATONIN              | PC3  | 0.268026756 | 1 |
| BENZYLPENICILLIN       | MCF7 | 0.268063984 | 1 |
| BETAXOLOL              | HL60 | 0.268169395 | 1 |
| PRESTWICK-864          | HL60 | 0.269026218 | 1 |
| RIFAMPICIN             | MCF7 | 0.26947835  | 1 |
| KAEMPFEROL             | HL60 | 0.269598374 | 1 |
| FULVESTRANT            | HL60 | 0.270102649 | 1 |

|                                |        |             |   |
|--------------------------------|--------|-------------|---|
| MONOBENZONE                    | HL60   | 0.270601457 | 1 |
| R-ATENOLOL                     | MCF7   | 0.270897324 | 1 |
| SPIRONOLACTONE                 | PC3    | 0.27110041  | 1 |
| TICARCILLIN                    | MCF7   | 0.27117568  | 1 |
| HALCINONIDE                    | PC3    | 0.27130359  | 1 |
| TIRATRICOL                     | PC3    | 0.272038423 | 1 |
| IDOXURIDINE                    | HL60   | 0.272182378 | 1 |
| TRIAMCINOLONE                  | MCF7   | 0.272320899 | 1 |
| DEXPROPRANOLOL                 | MCF7   | 0.27232638  | 1 |
| NIFURTIMOX                     | MCF7   | 0.27293241  | 1 |
| MOMETASONE                     | HL60   | 0.273191374 | 1 |
| ISOMETHEPTENE                  | PC3    | 0.273335703 | 1 |
| GUANETHIDINE                   | MCF7   | 0.274058055 | 1 |
| BENZONATATE                    | PC3    | 0.27436255  | 1 |
| TRIDIHEXETHYL                  | PC3    | 0.274492027 | 1 |
| ATROPINE OXIDE                 | PC3    | 0.274772004 | 1 |
| CYCLIC ADENOSINE MONOPHOSPHATE | PC3    | 0.274926421 | 1 |
| NITROFURANTOIN                 | PC3    | 0.274976871 | 1 |
| ETHOSUXIMIDE                   | HL60   | 0.275361236 | 1 |
| HALOPERIDOL                    | HL60   | 0.275608834 | 1 |
| GABEXATE                       | HL60   | 0.275796471 | 1 |
| PRASTERONE                     | HL60   | 0.276086862 | 1 |
| PRESTWICK-981                  | HL60   | 0.276232127 | 1 |
| SALSOLIDIN                     | PC3    | 0.276813656 | 1 |
| HYDROQUININE                   | PC3    | 0.277395932 | 1 |
| DESOXYCORTONE                  | MCF7   | 0.277648656 | 1 |
| CLOTRIMAZOLE                   | HL60   | 0.27768735  | 1 |
| VELNACRINE                     | PC3    | 0.278124827 | 1 |
| OXETACAINE                     | HL60   | 0.278270746 | 1 |
| ORCIPRENALINE                  | PC3    | 0.278416711 | 1 |
| AMPYRONE                       | HL60   | 0.279147238 | 1 |
| ABAMECTIN                      | HL60   | 0.279293483 | 1 |
| GLY-HIS-LYS                    | MCF7   | 0.279439775 | 1 |
| ATROPINE                       | PC3    | 0.28046512  | 1 |
| TERBUTALINE                    | HL60   | 0.280758494 | 1 |
| SALSOLIDIN                     | HL60   | 0.280905251 | 1 |
| FLUSPIRILENE                   | MCF7   | 0.281166317 | 1 |
| CHLORHEXIDINE                  | HL60   | 0.281492744 | 1 |
| SPECTINOMYCIN                  | PC3    | 0.282080981 | 1 |
| CHLORCYCLIZINE                 | HL60   | 0.282375378 | 1 |
| PUROMYCIN                      | HL60   | 0.282817321 | 1 |
| OFLOXACIN                      | HL60   | 0.282964728 | 1 |
| NALBUPHINE                     | PC3    | 0.283039494 | 1 |
| PRESTWICK-1082                 | PC3    | 0.283997878 | 1 |
| COLCHICINE                     | SKMEL5 | 0.28429348  | 1 |
| TERBUTALINE                    | PC3    | 0.284885242 | 1 |
| FLUPHENAZINE                   | PC3    | 0.284939005 | 1 |
| ETHOSUXIMIDE                   | MCF7   | 0.285033298 | 1 |
| PILOCARPINE                    | HL60   | 0.2851814   | 1 |
| AMOXICILLIN                    | PC3    | 0.285774272 | 1 |
| HARMINE                        | MCF7   | 0.286388132 | 1 |
| TINIDAZOLE                     | PC3    | 0.286598209 | 1 |
| FLUMEQUINE                     | HL60   | 0.286813578 | 1 |
| ROFECOXIB                      | HL60   | 0.287557325 | 1 |
| STOCK1N-28457                  | PC3    | 0.287855148 | 1 |
| PRESTWICK-665                  | MCF7   | 0.287860608 | 1 |
| PAROXETINE                     | PC3    | 0.288493054 | 1 |
| METOLAZONE                     | MCF7   | 0.288915146 | 1 |
| LEVONORGESTREL                 | PC3    | 0.28912633  | 1 |
| AMOXAPINE                      | HL60   | 0.289795486 | 1 |
| CHLOROPYRAZINE                 | PC3    | 0.290394079 | 1 |

|                        |      |             |   |
|------------------------|------|-------------|---|
| ALPRENOLOL             | HL60 | 0.290543842 | 1 |
| MEFENAMIC ACID         | PC3  | 0.290819118 | 1 |
| CARCININE              | PC3  | 0.291143354 | 1 |
| DINOPROST              | MCF7 | 0.291243235 | 1 |
| PRALIDOXIME            | HL60 | 0.291293347 | 1 |
| GLYCOCHOLIC ACID       | PC3  | 0.291443386 | 1 |
| CARBARSONE             | PC3  | 0.291743602 | 1 |
| PRACTOLOL              | PC3  | 0.292044002 | 1 |
| BRETYLIUM TOSILATE     | HL60 | 0.29219427  | 1 |
| LM-1685                | MCF7 | 0.292348107 | 1 |
| DOXYLAMINE             | PC3  | 0.29251779  | 1 |
| BACLOFEN               | HL60 | 0.292645351 | 1 |
| COLECALCIFEROL         | PC3  | 0.292946301 | 1 |
| METHOXSALEN            | MCF7 | 0.293369329 | 1 |
| CALCIUM FOLINATE       | MCF7 | 0.293582443 | 1 |
| ISOPROPAMIDE IODIDE    | HL60 | 0.294604802 | 1 |
| SULFAMETHOXAZOLE       | HL60 | 0.294906942 | 1 |
| BUPIVACAINE            | HL60 | 0.295058081 | 1 |
| STOCK1N-35215          | MCF7 | 0.295965874 | 1 |
| ORLISTAT               | MCF7 | 0.296095151 | 1 |
| VIGABATRIN             | MCF7 | 0.296268837 | 1 |
| KHELLIN                | MCF7 | 0.296361253 | 1 |
| CAPTOPRIL              | HL60 | 0.296420387 | 1 |
| AMIKACIN               | PC3  | 0.296571983 | 1 |
| SPIRONOLACTONE         | MCF7 | 0.296575648 | 1 |
| DOXORUBICIN            | PC3  | 0.296875311 | 1 |
| FLAVOXATE              | PC3  | 0.297330646 | 1 |
| INDOPROFEN             | PC3  | 0.297482515 | 1 |
| SULFINPYRAZONE         | PC3  | 0.29763443  | 1 |
| MERCAPTOPURINE         | PC3  | 0.29778639  | 1 |
| GEMFIBROZIL            | HL60 | 0.297938396 | 1 |
| THIOGUANOSINE          | PC3  | 0.298242545 | 1 |
| CEFOTAXIME             | PC3  | 0.298724608 | 1 |
| GABAPENTIN             | HL60 | 0.299156083 | 1 |
| THEOBROMINE            | HL60 | 0.299308498 | 1 |
| NICOTINIC ACID         | HL60 | 0.299460959 | 1 |
| DANAZOL                | HL60 | 0.299613466 | 1 |
| ENOXACIN               | PC3  | 0.299766018 | 1 |
| PAROMOMYCIN            | MCF7 | 0.300234295 | 1 |
| GLYCOPYRRONIUM BROMIDE | PC3  | 0.300450329 | 1 |
| PACLITAXEL             | PC3  | 0.300666453 | 1 |
| METOLAZONE             | HL60 | 0.300682282 | 1 |
| TETRAHYDROALSTONINE    | PC3  | 0.300835152 | 1 |
| CINCHONINE             | PC3  | 0.300988067 | 1 |
| TICARCILLIN            | PC3  | 0.301141027 | 1 |
| PROCHLORPERAZINE       | HL60 | 0.301422323 | 1 |
| SULFAQUINOXALINE       | HL60 | 0.30160018  | 1 |
| CLOFIBRATE             | MCF7 | 0.301965101 | 1 |
| GLAFENINE              | HL60 | 0.302366342 | 1 |
| PROCAINE               | HL60 | 0.302673123 | 1 |
| N-ACETYL-L-LEUCINE     | MCF7 | 0.3030498   | 1 |
| DIPIVEFRINE            | PC3  | 0.303594553 | 1 |
| EPITIOSTANOL           | PC3  | 0.303748282 | 1 |
| PIRINIXIC ACID         | PC3  | 0.304136759 | 1 |
| TRIMETHOPRIM           | HL60 | 0.304209743 | 1 |
| ETAMSYLATE             | MCF7 | 0.304572176 | 1 |
| OUABAIN                | PC3  | 0.304671609 | 1 |
| TIAPRIDE               | PC3  | 0.304790019 | 1 |
| NORFLOXACIN            | HL60 | 0.304825655 | 1 |
| ISOXSUPRINE            | HL60 | 0.304979746 | 1 |
| PROPAFENONE            | HL60 | 0.305133882 | 1 |

|                           |      |             |   |
|---------------------------|------|-------------|---|
| PRALIDOXIME               | PC3  | 0.305442289 | 1 |
| FLUNIXIN                  | PC3  | 0.305444091 | 1 |
| ARCAINE                   | MCF7 | 0.305662295 | 1 |
| CAMPTOTHECIN              | PC3  | 0.306059644 | 1 |
| THIAMAZOLE                | MCF7 | 0.306165019 | 1 |
| CEFOTETAN                 | PC3  | 0.306214095 | 1 |
| IMATINIB                  | PC3  | 0.306523132 | 1 |
| NIFEDIPINE                | PC3  | 0.306973411 | 1 |
| BETAHISTINE               | PC3  | 0.306987026 | 1 |
| 12,13-EODE                | MCF7 | 0.307296513 | 1 |
| AZATHIOPRINE              | HL60 | 0.30760618  | 1 |
| SULINDAC SULFIDE          | MCF7 | 0.307761081 | 1 |
| GELSEMINE                 | HL60 | 0.308071017 | 1 |
| GLYCOPYRRONIUM BROMIDE    | HL60 | 0.308381133 | 1 |
| HYDROXYZINE               | PC3  | 0.3087266   | 1 |
| 4,5-DIANILINOPHTHALIMIDE  | PC3  | 0.309467951 | 1 |
| MEGLUMINE                 | HL60 | 0.309778873 | 1 |
| PEPSTATIN                 | PC3  | 0.310556962 | 1 |
| PRESTWICK-1085            | PC3  | 0.310712714 | 1 |
| METHYLERGOMETRINE         | MCF7 | 0.310926155 | 1 |
| ALFUZOSIN                 | PC3  | 0.311024353 | 1 |
| TIRATRICOL                | HL60 | 0.311648165 | 1 |
| PROPAFENONE               | PC3  | 0.311960338 | 1 |
| TERBUTALINE               | MCF7 | 0.312029285 | 1 |
| CORBADRINE                | PC3  | 0.312428934 | 1 |
| SERTACONAZOLE             | PC3  | 0.313054351 | 1 |
| CLENBUTEROL               | PC3  | 0.313367327 | 1 |
| ISOPROPAMIDE IODIDE       | PC3  | 0.313680481 | 1 |
| BEMEGRIDE                 | HL60 | 0.31462101  | 1 |
| MEPENZOLATE BROMIDE       | HL60 | 0.315406005 | 1 |
| TRIMETAZIDINE             | PC3  | 0.316192109 | 1 |
| COLISTIN                  | PC3  | 0.316349463 | 1 |
| FURAZOLIDONE              | MCF7 | 0.31757831  | 1 |
| CLIOQUINOL                | PC3  | 0.317925433 | 1 |
| AMIODARONE                | PC3  | 0.318399086 | 1 |
| GIBBERELLIC ACID          | MCF7 | 0.318471294 | 1 |
| PRESTWICK-857             | HL60 | 0.318715075 | 1 |
| AMOXICILLIN               | HL60 | 0.318873136 | 1 |
| CARISOPRODOL              | MCF7 | 0.320037412 | 1 |
| ACICLOVIR                 | MCF7 | 0.320717936 | 1 |
| BECLOMETASONE             | PC3  | 0.320931933 | 1 |
| PRESTWICK-675             | PC3  | 0.321158708 | 1 |
| LOMEFLOXACIN              | PC3  | 0.321607842 | 1 |
| PHENELZINE                | HL60 | 0.321725756 | 1 |
| MELATONIN                 | HL60 | 0.322361605 | 1 |
| LETROZOLE                 | PC3  | 0.322520676 | 1 |
| CHLORAMPHENICOL           | PC3  | 0.322957348 | 1 |
| FISETIN                   | PC3  | 0.323316691 | 1 |
| PRESTWICK-864             | PC3  | 0.323476025 | 1 |
| NETILMICIN                | MCF7 | 0.323633284 | 1 |
| LYSERGOL                  | PC3  | 0.324113799 | 1 |
| MEPHENYTOIN               | MCF7 | 0.324535755 | 1 |
| DIHYDROERGOCRISTINE       | HL60 | 0.325231585 | 1 |
| AMBROXOL                  | PC3  | 0.325551345 | 1 |
| ETILEFRINE                | MCF7 | 0.326118439 | 1 |
| SULFAPHENAZOLE            | PC3  | 0.326191387 | 1 |
| NARINGENIN                | PC3  | 0.326671876 | 1 |
| 6-BROMOINDIRUBIN-3'-OXIME | MCF7 | 0.326794029 | 1 |
| ROFECOXIB                 | MCF7 | 0.326812587 | 1 |
| ISOETARINE                | HL60 | 0.326832125 | 1 |
| ENALAPRIL                 | PC3  | 0.326992419 | 1 |

|                                |        |             |   |
|--------------------------------|--------|-------------|---|
| SR-95531                       | PC3    | 0.327313135 | 1 |
| PROGUANIL                      | MCF7   | 0.327478421 | 1 |
| LASALOCID                      | HL60   | 0.328276327 | 1 |
| CEFALONIUM                     | MCF7   | 0.328437011 | 1 |
| NOMEGESTROL                    | PC3    | 0.328597738 | 1 |
| PRESTWICK-967                  | PC3    | 0.328758508 | 1 |
| ABAMECTIN                      | PC3    | 0.328919322 | 1 |
| LACTOBIONIC ACID               | PC3    | 0.329563009 | 1 |
| PIOGLITAZONE                   | MCF7   | 0.329689149 | 1 |
| DIMETHADIONE                   | HL60   | 0.329885112 | 1 |
| ZAPRINAST                      | PC3    | 0.330207388 | 1 |
| CANAVANINE                     | MCF7   | 0.330368591 | 1 |
| PREGNENOLONE                   | MCF7   | 0.330663851 | 1 |
| METANEPHRINE                   | HL60   | 0.330691126 | 1 |
| ALPRENOLOL                     | PC3    | 0.331175252 | 1 |
| NADOLOL                        | PC3    | 0.331336713 | 1 |
| AMYLOCAINE                     | HL60   | 0.331659765 | 1 |
| TRIBENOSIDE                    | PC3    | 0.332629954 | 1 |
| SULFASALAZINE                  | PC3    | 0.332791803 | 1 |
| CORALYNE                       | MCF7   | 0.332949519 | 1 |
| THEOBROMINE                    | MCF7   | 0.334095576 | 1 |
| GANCICLOVIR                    | MCF7   | 0.334784239 | 1 |
| PIPERINE                       | MCF7   | 0.335243776 | 1 |
| PRESTWICK-860                  | PC3    | 0.335387214 | 1 |
| ETOFYLLINE                     | PC3    | 0.335473673 | 1 |
| CEPHAELINE                     | PC3    | 0.335875073 | 1 |
| FLUNARIZINE                    | PC3    | 0.336037778 | 1 |
| IOPAMIDOL                      | MCF7   | 0.336163875 | 1 |
| DEBRISOQUINE                   | PC3    | 0.336689025 | 1 |
| SPECTINOMYCIN                  | HL60   | 0.337177907 | 1 |
| CO-DERGOCRINE MESILATE         | MCF7   | 0.337546583 | 1 |
| LYMECYCLINE                    | MCF7   | 0.338008166 | 1 |
| MORACIZINE                     | MCF7   | 0.338239086 | 1 |
| PROPIDIUM IODIDE               | PC3    | 0.338320122 | 1 |
| BENZAMIL                       | MCF7   | 0.33856848  | 1 |
| AMILORIDE                      | HL60   | 0.338646852 | 1 |
| ATOVAQUONE                     | PC3    | 0.338810281 | 1 |
| SULPIRIDE                      | MCF7   | 0.339163612 | 1 |
| CHLORPROTHIXENE                | PC3    | 0.339464419 | 1 |
| IOBENGUANE                     | PC3    | 0.340119235 | 1 |
| METHOCARBAMOL                  | PC3    | 0.340283045 | 1 |
| 16,16-DIMETHYLPROSTAGLANDIN E2 | MCF7   | 0.340446897 | 1 |
| DIPYRIDAMOLE                   | HL60   | 0.341595044 | 1 |
| PROBENECID                     | PC3    | 0.341923466 | 1 |
| ACEBUTOLOL                     | PC3    | 0.34217768  | 1 |
| YOHIMBIC ACID                  | MCF7   | 0.342416415 | 1 |
| ISOCARBOXAZID                  | PC3    | 0.343340734 | 1 |
| ZUCLOPENTHIXOL                 | PC3    | 0.343403449 | 1 |
| PSEUDOPELLETIERINE             | PC3    | 0.343897533 | 1 |
| FINASTERIDE                    | HL60   | 0.344062312 | 1 |
| NOVOBIOCIN                     | SKMEL5 | 0.3445569   | 1 |
| PHENYL BIGUANIDE               | MCF7   | 0.344721846 | 1 |
| FLUCYTOSINE                    | MCF7   | 0.34473917  | 1 |
| BENZTHIAZIDE                   | MCF7   | 0.345205987 | 1 |
| IOCETAMIC ACID                 | MCF7   | 0.345906839 | 1 |
| SPIRAMYCIN                     | HL60   | 0.346373611 | 1 |
| PRESTWICK-691                  | PC3    | 0.347035486 | 1 |
| PROBENECID                     | HL60   | 0.347366673 | 1 |
| PERPHENAZINE                   | HL60   | 0.347698028 | 1 |
| DIGOXIN                        | MCF7   | 0.348248436 | 1 |
| DIZOCILPINE                    | HL60   | 0.348361235 | 1 |



|                           |        |             |   |
|---------------------------|--------|-------------|---|
| JOSAMYCIN                 | HL60   | 0.348693088 | 1 |
| CINCHOCAINE               | MCF7   | 0.348952538 | 1 |
| HYDROCHLOROTHIAZIDE       | HL60   | 0.349191179 | 1 |
| OZAGREL                   | PC3    | 0.349357292 | 1 |
| DESIPRAMINE               | PC3    | 0.349689642 | 1 |
| TOLBUTAMIDE               | MCF7   | 0.350340452 | 1 |
| ANISOMYCIN                | PC3    | 0.350687688 | 1 |
| LOVASTATIN                | HL60   | 0.3510207   | 1 |
| TAMOXIFEN                 | ssMCF7 | 0.351187268 | 1 |
| CALYCANTHINE              | HL60   | 0.351520529 | 1 |
| ATRACTYLOSIDE             | MCF7   | 0.351540625 | 1 |
| COLISTIN                  | HL60   | 0.352020728 | 1 |
| BUTACAINE                 | PC3    | 0.352187543 | 1 |
| FENOTEROL                 | PC3    | 0.353523548 | 1 |
| BUTAMBEN                  | MCF7   | 0.353665576 | 1 |
| TRIMETHYLCOLCHICINIC ACID | HL60   | 0.353690734 | 1 |
| DINOPROST                 | PC3    | 0.354359885 | 1 |
| PIRINIXIC ACID            | MCF7   | 0.354612134 | 1 |
| FULVESTRANT               | ssMCF7 | 0.355197246 | 1 |
| H-7                       | PC3    | 0.356034426 | 1 |
| TOBRAMYCIN                | PC3    | 0.356035629 | 1 |
| RALOXIFENE                | MCF7   | 0.356358698 | 1 |
| SYROSIINGOPINE            | HL60   | 0.356371267 | 1 |
| 0225151-0000              | PC3    | 0.356509177 | 1 |
| GELSEMINE                 | PC3    | 0.356875031 | 1 |
| MIDODRINE                 | MCF7   | 0.357935383 | 1 |
| METHAPYRILENE             | PC3    | 0.358051903 | 1 |
| ESTRIOL                   | PC3    | 0.358725295 | 1 |
| LISINOPRIL                | MCF7   | 0.359602984 | 1 |
| PROFENAMINE               | MCF7   | 0.359841536 | 1 |
| FOSFOSAL                  | PC3    | 0.360074021 | 1 |
| METYRAPONE                | PC3    | 0.360242794 | 1 |
| CP-645525-01              | MCF7   | 0.360557678 | 1 |
| AZTREONAM                 | MCF7   | 0.360796554 | 1 |
| BENZTHIAZIDE              | PC3    | 0.361087262 | 1 |
| NALTREXONE                | HL60   | 0.361256277 | 1 |
| GLIBENCLAMIDE             | MCF7   | 0.361274547 | 1 |
| EQUILIN                   | PC3    | 0.361425331 | 1 |
| PIVAMPICILLIN             | PC3    | 0.361763562 | 1 |
| CEFIXIME                  | PC3    | 0.362440504 | 1 |
| 3-NITROPROPIONIC ACID     | PC3    | 0.362710455 | 1 |
| IFENPRODIL                | PC3    | 0.362779217 | 1 |
| DICLOFENAMIDE             | MCF7   | 0.362950054 | 1 |
| IODIXANOL                 | MCF7   | 0.363429493 | 1 |
| TOLAZAMIDE                | MCF7   | 0.364475181 | 1 |
| AMRINONE                  | MCF7   | 0.36462949  | 1 |
| MECLOZINE                 | PC3    | 0.364644997 | 1 |
| LORACARBEF                | MCF7   | 0.36486973  | 1 |
| FLUOROMETHOLONE           | PC3    | 0.365664732 | 1 |
| SULFADIMETHOXINE          | MCF7   | 0.365831483 | 1 |
| OMEPRAZOLE                | PC3    | 0.365834827 | 1 |
| PEPSTATIN                 | MCF7   | 0.366312837 | 1 |
| CYPROTERONE               | HL60   | 0.367708494 | 1 |
| ALBENDAZOLE               | HL60   | 0.368220326 | 1 |
| CEFOPERAZONE              | HL60   | 0.368391016 | 1 |
| CINCHONINE                | MCF7   | 0.368724367 | 1 |
| DORZOLAMIDE               | PC3    | 0.369245057 | 1 |
| LIDOFLAZINE               | MCF7   | 0.369691193 | 1 |
| TODRALAZINE               | MCF7   | 0.369933096 | 1 |
| STREPTOMYCIN              | HL60   | 0.370442369 | 1 |
| ISOSORBIDE                | HL60   | 0.370613571 | 1 |

|                             |      |             |   |
|-----------------------------|------|-------------|---|
| CITIOLONE                   | MCF7 | 0.370752193 | 1 |
| SCOPOLAMINE                 | HL60 | 0.370784812 | 1 |
| KETOROLAC                   | HL60 | 0.370956093 | 1 |
| RILMENIDINE                 | MCF7 | 0.371386166 | 1 |
| PIRACETAM                   | PC3  | 0.372327746 | 1 |
| MOROXYDINE                  | PC3  | 0.373084978 | 1 |
| (+/-)-CATECHIN              | MCF7 | 0.373571056 | 1 |
| PIVAMPICILLIN               | MCF7 | 0.373814212 | 1 |
| KAWAIN                      | HL60 | 0.37456201  | 1 |
| TAMOXIFEN                   | HL60 | 0.374734149 | 1 |
| FOLIC ACID                  | MCF7 | 0.374787612 | 1 |
| AG-013608                   | PC3  | 0.375414465 | 1 |
| 7-AMINOCEPHALOSPORANIC ACID | PC3  | 0.375595424 | 1 |
| PARGYLINE                   | PC3  | 0.376285142 | 1 |
| LIOTHYRONINE                | PC3  | 0.376630232 | 1 |
| ETHIONAMIDE                 | PC3  | 0.377493633 | 1 |
| BENZETHONIUM CHLORIDE       | HL60 | 0.377839263 | 1 |
| PICOTAMIDE                  | MCF7 | 0.37795972  | 1 |
| 15-DELTA PROSTAGLANDIN J2   | PC3  | 0.378505075 | 1 |
| THIOPROPERAZINE             | PC3  | 0.378693595 | 1 |
| MICONAZOLE                  | PC3  | 0.378938374 | 1 |
| DOBUTAMINE                  | PC3  | 0.380089601 | 1 |
| MESORIDAZINE                | HL60 | 0.380436381 | 1 |
| PIRIBEDIL                   | PC3  | 0.380609828 | 1 |
| PHYSOSTIGMINE               | HL60 | 0.380783313 | 1 |
| LOBELANIDINE                | PC3  | 0.381651311 | 1 |
| MECLOCYCLINE                | PC3  | 0.381825025 | 1 |
| TOLFENAMIC ACID             | HL60 | 0.382694163 | 1 |
| IOPROMIDE                   | MCF7 | 0.383111292 | 1 |
| DIPHENHYDRAMINE             | MCF7 | 0.383849969 | 1 |
| PROXYPHYLLINE               | PC3  | 0.385307251 | 1 |
| BAMBUTEROL                  | MCF7 | 0.385576189 | 1 |
| KETOPROFEN                  | MCF7 | 0.386638517 | 1 |
| NAFTIDROFURYL               | PC3  | 0.387054014 | 1 |
| PRESTWICK-642               | MCF7 | 0.387058737 | 1 |
| LEFLUNOMIDE                 | PC3  | 0.387228896 | 1 |
| METHANTHELINIUM BROMIDE     | PC3  | 0.387578772 | 1 |
| CIMETIDINE                  | PC3  | 0.388048599 | 1 |
| PARAROSANILINE              | MCF7 | 0.388103867 | 1 |
| CHLOROPYRAMINE              | HL60 | 0.388629297 | 1 |
| PYRIMETHAMINE               | PC3  | 0.389783725 | 1 |
| METHYLBENZETHONIUM CHLORIDE | PC3  | 0.390528463 | 1 |
| NS-398                      | PC3  | 0.390558733 | 1 |
| BETULINIC ACID              | MCF7 | 0.391771172 | 1 |
| LEVAMISOLE                  | HL60 | 0.392140691 | 1 |
| DEMECARIUM BROMIDE          | PC3  | 0.392316648 | 1 |
| SULMAZOLE                   | HL60 | 0.392492642 | 1 |
| PROPRANOLOL                 | MCF7 | 0.392766666 | 1 |
| IC-86621                    | MCF7 | 0.393015723 | 1 |
| ASCORBIC ACID               | PC3  | 0.393196985 | 1 |
| DEMECLOCYCLINE              | MCF7 | 0.39332641  | 1 |
| ATROPINE METHONITRATE       | PC3  | 0.394254599 | 1 |
| QUINISOCAINE                | PC3  | 0.394607429 | 1 |
| NARINGIN                    | MCF7 | 0.39526053  | 1 |
| CLOTRIMAZOLE                | MCF7 | 0.396077768 | 1 |
| NAFTOPIDIL                  | MCF7 | 0.396196969 | 1 |
| TYLOXAPOL                   | PC3  | 0.396550599 | 1 |
| DEXAMETHASONE               | HL60 | 0.397258295 | 1 |
| OXAPROZIN                   | MCF7 | 0.397431934 | 1 |
| HESPERIDIN                  | PC3  | 0.39761236  | 1 |
| FASUDIL                     | MCF7 | 0.397789447 | 1 |

|                             |        |             |   |
|-----------------------------|--------|-------------|---|
| PROBUCOL                    | MCF7   | 0.398140524 | 1 |
| ETHAMBUTOL                  | PC3    | 0.398513427 | 1 |
| GABAPENTIN                  | PC3    | 0.398675421 | 1 |
| CAFFEIC ACID                | MCF7   | 0.399030062 | 1 |
| VALPROIC ACID               | ssMCF7 | 0.399384847 | 1 |
| ILOPROST                    | SKMEL5 | 0.399739776 | 1 |
| HYDRALAZINE                 | MCF7   | 0.399759954 | 1 |
| FLUTAMIDE                   | HL60   | 0.400094848 | 1 |
| PARACETAMOL                 | MCF7   | 0.400270036 | 1 |
| MONOCROTALINE               | PC3    | 0.400272438 | 1 |
| DEXAMETHASONE               | ssMCF7 | 0.400450063 | 1 |
| BETULINIC ACID              | PC3    | 0.401160923 | 1 |
| PENTETIC ACID               | MCF7   | 0.401606867 | 1 |
| BUTIRO SIN                  | MCF7   | 0.401778492 | 1 |
| LOMEFLOXACIN                | MCF7   | 0.401915061 | 1 |
| TRIAMCINOLONE               | HL60   | 0.402584352 | 1 |
| ALPHA-ERGOCRYPTINE          | PC3    | 0.402785554 | 1 |
| SUPROFEN                    | MCF7   | 0.403037497 | 1 |
| NAPHAZOLINE                 | HL60   | 0.403475149 | 1 |
| ESTRADIOL                   | ssMCF7 | 0.403541595 | 1 |
| PERHEXILINE                 | MCF7   | 0.40379375  | 1 |
| CALYCANTHINE                | MCF7   | 0.404045976 | 1 |
| LY-294002                   | ssMCF7 | 0.404188423 | 1 |
| HEXYLCAINE                  | MCF7   | 0.405308164 | 1 |
| 1,5-ISOQUINOLINEDIOL        | HL60   | 0.406152834 | 1 |
| PRESTWICK-689               | PC3    | 0.406689319 | 1 |
| AJMALINE                    | MCF7   | 0.406825107 | 1 |
| CONVOLAMINE                 | PC3    | 0.406868217 | 1 |
| TROLOX C                    | PC3    | 0.40704715  | 1 |
| OXOLAMINE                   | MCF7   | 0.407078176 | 1 |
| ALVERINE                    | MCF7   | 0.407226118 | 1 |
| VALDECOXIB                  | PC3    | 0.407837801 | 1 |
| STOCK1N-35696               | MCF7   | 0.408121482 | 1 |
| SUCCINYLSULFATHIAZOLE       | MCF7   | 0.408851609 | 1 |
| BUMETANIDE                  | MCF7   | 0.409612694 | 1 |
| AMBROXOL                    | MCF7   | 0.409866527 | 1 |
| OXYMETAZOLINE               | PC3    | 0.410628441 | 1 |
| TETRYZOLINE                 | HL60   | 0.410633114 | 1 |
| ANISOMYCIN                  | MCF7   | 0.41088255  | 1 |
| PERGOLIDE                   | PC3    | 0.410992472 | 1 |
| IMIPRAMINE                  | MCF7   | 0.411390975 | 1 |
| ANTAZOLINE                  | PC3    | 0.411711599 | 1 |
| TRIFLUPROMAZINE             | PC3    | 0.411891466 | 1 |
| NAFCILLIN                   | PC3    | 0.412071368 | 1 |
| TRIAMCINOLONE               | PC3    | 0.412154128 | 1 |
| BEMEGRIDE                   | PC3    | 0.412971391 | 1 |
| FLUCYTOSINE                 | HL60   | 0.413331639 | 1 |
| FLUOROCURARINE              | PC3    | 0.413511814 | 1 |
| METERGOLINE                 | HL60   | 0.414052544 | 1 |
| ALPROSTADIL                 | PC3    | 0.414954094 | 1 |
| FLUPHENAZINE                | SKMEL5 | 0.41495444  | 1 |
| NIMODIPINE                  | MCF7   | 0.415212884 | 1 |
| METHYLERGOMETRINE           | PC3    | 0.415315435 | 1 |
| PIPERIDOLATE                | HL60   | 0.415676566 | 1 |
| TETROQUINONE                | PC3    | 0.415857182 | 1 |
| LY-294002                   | SKMEL5 | 0.416760769 | 1 |
| ALPHA-ERGOCRYPTINE          | MCF7   | 0.416936079 | 1 |
| DOXYLAMINE                  | HL60   | 0.416941587 | 1 |
| BETHANECHOL                 | PC3    | 0.417122439 | 1 |
| BEPHENIUM HYDROXYNAPHTHOATE | PC3    | 0.417484243 | 1 |
| ISOXICAM                    | MCF7   | 0.418025308 | 1 |

|                                    |        |             |   |
|------------------------------------|--------|-------------|---|
| DROPERIDOL                         | HL60   | 0.418208254 | 1 |
| AMINOHIPPURIC ACID                 | PC3    | 0.418389341 | 1 |
| NICARDIPINE                        | MCF7   | 0.418793742 | 1 |
| IVERMECTIN                         | HL60   | 0.4189328   | 1 |
| DOXYCYCLINE                        | PC3    | 0.41947656  | 1 |
| WORTMANNIN                         | ssMCF7 | 0.420746495 | 1 |
| CLOMIPRAMINE                       | HL60   | 0.42129125  | 1 |
| SULFAMETOXYDIAZINE                 | PC3    | 0.421654585 | 1 |
| DIPIVEFRINE                        | MCF7   | 0.421873464 | 1 |
| XYLOMETAZOLINE                     | HL60   | 0.422199835 | 1 |
| BAS-012416453                      | MCF7   | 0.422387677 | 1 |
| PENTOXIFYLLINE                     | HL60   | 0.422563499 | 1 |
| AZACITIDINE                        | MCF7   | 0.422902152 | 1 |
| PILOCARPINE                        | PC3    | 0.423473234 | 1 |
| PARGYLINE                          | MCF7   | 0.423674358 | 1 |
| AZAPERONE                          | PC3    | 0.423837357 | 1 |
| GLIBENCLAMIDE                      | PC3    | 0.424383786 | 1 |
| ISONIAZID                          | PC3    | 0.424447151 | 1 |
| RAMIPRIL                           | PC3    | 0.425295154 | 1 |
| LANSOPRAZOLE                       | HL60   | 0.425659928 | 1 |
| SULFAMONOMETHOXINE                 | MCF7   | 0.425736443 | 1 |
| FLUDROCORTISONE                    | PC3    | 0.425994496 | 1 |
| BENZTHIAZIDE                       | HL60   | 0.426207333 | 1 |
| MINOXIDIL                          | PC3    | 0.427285731 | 1 |
| BROMPHENIRAMINE                    | HL60   | 0.427303015 | 1 |
| BENSERAZIDE                        | MCF7   | 0.427961211 | 1 |
| NORETHISTERONE                     | PC3    | 0.429131723 | 1 |
| DICYCLOVERINE                      | MCF7   | 0.429355052 | 1 |
| ETICLOPRIDE                        | PC3    | 0.431146988 | 1 |
| BENZYDAMINE                        | MCF7   | 0.431169058 | 1 |
| ACETOHEXAMIDE                      | HL60   | 0.431330385 | 1 |
| BUFEXAMAC                          | PC3    | 0.431697272 | 1 |
| FURALTADONE                        | PC3    | 0.433505905 | 1 |
| COLECALCIFEROL                     | MCF7   | 0.433765868 | 1 |
| THIOPERAMIDE                       | MCF7   | 0.434208412 | 1 |
| DEXTROMETHORPHAN                   | PC3    | 0.434269008 | 1 |
| L-METHIONINE SULFOXIMINE           | MCF7   | 0.434806348 | 1 |
| ATROPINE OXIDE                     | MCF7   | 0.435066624 | 1 |
| BENFOTIAMINE                       | PC3    | 0.43518897  | 1 |
| FAMPROFAZONE                       | MCF7   | 0.435483496 | 1 |
| TROLOX C                           | HL60   | 0.4359255   | 1 |
| GELDANAMYCIN                       | PC3    | 0.436108348 | 1 |
| BISOPROLOL                         | PC3    | 0.43610971  | 1 |
| LEVOCABASTINE                      | PC3    | 0.436662525 | 1 |
| FIPEXIDE                           | HL60   | 0.437031223 | 1 |
| CYANOCOBALAMIN                     | MCF7   | 0.437672789 | 1 |
| PERHEXILINE                        | PC3    | 0.437768987 | 1 |
| SPARTEINE                          | HL60   | 0.437953505 | 1 |
| MG-262                             | PC3    | 0.438194761 | 1 |
| 16-PHENYLTETTRANORPROSTAGLANDIN E2 | MCF7   | 0.438194761 | 1 |
| CHLORTALIDONE                      | MCF7   | 0.43845584  | 1 |
| TRIMETHYLCOLCHICINIC ACID          | PC3    | 0.438691884 | 1 |
| PROPOFOL                           | PC3    | 0.439800367 | 1 |
| BETONICINE                         | HL60   | 0.44035502  | 1 |
| SC-560                             | MCF7   | 0.441331722 | 1 |
| TOLAZAMIDE                         | PC3    | 0.441650269 | 1 |
| TETRAETHYLENEPENTAMINE             | MCF7   | 0.442950887 | 1 |
| MORACIZINE                         | PC3    | 0.443132361 | 1 |
| CHLORCYCLIZINE                     | PC3    | 0.444214908 | 1 |
| BUSPIRONE                          | PC3    | 0.444245187 | 1 |
| STACHYDRINE                        | MCF7   | 0.445002486 | 1 |

|                        |      |             |   |
|------------------------|------|-------------|---|
| SULFAMETHIZOLE         | HL60 | 0.445916432 | 1 |
| PF-00875133-00         | PC3  | 0.446102274 | 1 |
| LEVODOPA               | MCF7 | 0.446579239 | 1 |
| METHOTREXATE           | PC3  | 0.446703036 | 1 |
| PSEUDOPelletierine     | MCF7 | 0.447105295 | 1 |
| PROXYMETACaine         | PC3  | 0.447217942 | 1 |
| FLUPHENAZINE           | HL60 | 0.447226936 | 1 |
| CLOMIFENE              | PC3  | 0.447962307 | 1 |
| MEBENDAZOLE            | PC3  | 0.448158109 | 1 |
| PRESTWICK-674          | PC3  | 0.448421459 | 1 |
| NEFOPAM                | MCF7 | 0.4486374   | 1 |
| ERGOCALCIFEROL         | MCF7 | 0.448684867 | 1 |
| 3-ACETYLCoumarin       | PC3  | 0.44907973  | 1 |
| MENADIONE              | HL60 | 0.449266069 | 1 |
| OLEANDOMYCIN           | PC3  | 0.449475439 | 1 |
| CONVOLAMINE            | HL60 | 0.449638834 | 1 |
| 0198306-0000           | PC3  | 0.449739079 | 1 |
| HYDRASTININE           | MCF7 | 0.450530347 | 1 |
| HARMOL                 | PC3  | 0.450757822 | 1 |
| ETYNODIOL              | MCF7 | 0.452114435 | 1 |
| PHthalylsulfathiazole  | MCF7 | 0.452515524 | 1 |
| SULFAGUANIDINE         | PC3  | 0.452907251 | 1 |
| GALANTAMINE            | HL60 | 0.453185841 | 1 |
| FENSPiRIDE             | PC3  | 0.45343608  | 1 |
| LYCORINE               | PC3  | 0.45355981  | 1 |
| DROPERIDOL             | MCF7 | 0.45370058  | 1 |
| ETACRYNIC ACID         | HL60 | 0.453746837 | 1 |
| F0447-0125             | PC3  | 0.453965136 | 1 |
| PIPERACETAZINE         | MCF7 | 0.454759144 | 1 |
| FENOTEROL              | MCF7 | 0.454869593 | 1 |
| (-)-ATENOLOL           | MCF7 | 0.45581861  | 1 |
| ETHISTERONE            | HL60 | 0.456180755 | 1 |
| NAFCILLIN              | MCF7 | 0.456613797 | 1 |
| METRONIDAZOLE          | HL60 | 0.456930605 | 1 |
| CO-DERGOCRINE MESILATE | PC3  | 0.457118138 | 1 |
| BEMEGRIDE              | MCF7 | 0.457144201 | 1 |
| PROBENECID             | MCF7 | 0.457409486 | 1 |
| TROPICAMIDE            | PC3  | 0.457940224 | 1 |
| ENILCONAZOLE           | MCF7 | 0.458205675 | 1 |
| HYDROXYACHILLIN        | PC3  | 0.458243914 | 1 |
| CLOZAPINE              | MCF7 | 0.458801545 | 1 |
| NIMODIPINE             | PC3  | 0.458807176 | 1 |
| 10-METHOXYHARMALAN     | HL60 | 0.458994985 | 1 |
| ZAPRINAST              | MCF7 | 0.459002362 | 1 |
| AMPICILLIN             | MCF7 | 0.459533762 | 1 |
| ROSIGLITAZONE          | MCF7 | 0.459618393 | 1 |
| NORFLOXACIN            | MCF7 | 0.459799544 | 1 |
| THIOPROPERAZINE        | MCF7 | 0.460065381 | 1 |
| LABETALOL              | PC3  | 0.460122416 | 1 |
| SALSOLINOL             | PC3  | 0.460310417 | 1 |
| ALTIZIDE               | PC3  | 0.460686501 | 1 |
| ALTIZIDE               | MCF7 | 0.460863219 | 1 |
| RESERPINE              | PC3  | 0.461062693 | 1 |
| ISRADIPINE             | PC3  | 0.462003651 | 1 |
| GRISEOFULVIN           | HL60 | 0.462380223 | 1 |
| LEVOPROPOXYPHENE       | PC3  | 0.46256855  | 1 |
| MESORIDAZINE           | MCF7 | 0.462726744 | 1 |
| BROMOPRIDE             | PC3  | 0.462726744 | 1 |
| PF-00875133-00         | MCF7 | 0.463259666 | 1 |
| N-ACETYLMURAMIC ACID   | PC3  | 0.464076131 | 1 |
| BENZyDAMINE            | HL60 | 0.464830564 | 1 |

|                             |        |             |   |
|-----------------------------|--------|-------------|---|
| LYSERGOL                    | MCF7   | 0.465660462 | 1 |
| DIGITOXIGENIN               | PC3    | 0.46596301  | 1 |
| DYDROGESTERONE              | HL60   | 0.466151844 | 1 |
| STREPTOZOCIN                | MCF7   | 0.466194556 | 1 |
| ACETYLSALICYLIC ACID        | MCF7   | 0.466378714 | 1 |
| INDOMETACIN                 | PC3    | 0.466461683 | 1 |
| MOROXYDINE                  | MCF7   | 0.466728862 | 1 |
| BACAMPICILLIN               | PC3    | 0.467096407 | 1 |
| BENZBROMARONE               | MCF7   | 0.467285399 | 1 |
| STOCK1N-28457               | MCF7   | 0.467530715 | 1 |
| 0297417-0002B               | PC3    | 0.46766346  | 1 |
| BEPHENIUM HYDROXYNAPHTHOATE | MCF7   | 0.468148605 | 1 |
| TIABENDAZOLE                | PC3    | 0.468419897 | 1 |
| SC-58125                    | SKMEL5 | 0.468798272 | 1 |
| ATROPINE                    | MCF7   | 0.469135832 | 1 |
| VIDARABINE                  | HL60   | 0.470312807 | 1 |
| MECLOFENAMIC ACID           | MCF7   | 0.470474855 | 1 |
| SODIUM PHENYLBUTYRATE       | PC3    | 0.471260229 | 1 |
| PALMATINE                   | MCF7   | 0.471547    | 1 |
| PIMOZIDE                    | PC3    | 0.471639377 | 1 |
| MOMETASONE                  | MCF7   | 0.471815164 | 1 |
| NOSCAPINE                   | PC3    | 0.472018626 | 1 |
| 10-METHOXYHARMALAN          | MCF7   | 0.472888329 | 1 |
| NICLOSAMIDE                 | MCF7   | 0.473156747 | 1 |
| HARMALINE                   | PC3    | 0.473916398 | 1 |
| FENOPROFEN                  | MCF7   | 0.474387442 | 1 |
| MINOXIDIL                   | HL60   | 0.474866228 | 1 |
| ZOMEPIRAC                   | PC3    | 0.475816683 | 1 |
| LEFLUNOMIDE                 | MCF7   | 0.476650748 | 1 |
| BERBERINE                   | PC3    | 0.477148363 | 1 |
| 3-NITROPROPIONIC ACID       | MCF7   | 0.477458249 | 1 |
| TRIMETHOPRIM                | PC3    | 0.477727514 | 1 |
| PROPANTHELINE BROMIDE       | MCF7   | 0.477996829 | 1 |
| PHENINDIONE                 | PC3    | 0.478481248 | 1 |
| SERTACONAZOLE               | MCF7   | 0.478805065 | 1 |
| VALPROIC ACID               | SKMEL5 | 0.479434042 | 1 |
| TYLOXAPOL                   | MCF7   | 0.479883395 | 1 |
| CP-863187                   | MCF7   | 0.480153099 | 1 |
| NICERGOLINE                 | HL60   | 0.480768971 | 1 |
| NIRIDAZOLE                  | PC3    | 0.480959771 | 1 |
| PICROTOXININ                | PC3    | 0.481150596 | 1 |
| SCOPOLAMINE                 | MCF7   | 0.481232395 | 1 |
| MYRICETIN                   | HL60   | 0.481341444 | 1 |
| NICARDIPINE                 | PC3    | 0.481723212 | 1 |
| THIAMAZOLE                  | PC3    | 0.482312458 | 1 |
| LUTEOLIN                    | MCF7   | 0.482852775 | 1 |
| TOLAZOLINE                  | HL60   | 0.48286909  | 1 |
| MEROPENEM                   | PC3    | 0.483060152 | 1 |
| FLUNISOLIDE                 | PC3    | 0.483123004 | 1 |
| TYRPHOSTIN AG-1478          | MCF7   | 0.483633482 | 1 |
| SULPIRIDE                   | PC3    | 0.483933976 | 1 |
| DIRITHROMYCIN               | MCF7   | 0.484204394 | 1 |
| METRIZAMIDE                 | PC3    | 0.484207023 | 1 |
| VALINOMYCIN                 | MCF7   | 0.484474859 | 1 |
| THAPSIGARGIN                | PC3    | 0.485163394 | 1 |
| HEMICHOLINIUM               | PC3    | 0.485354738 | 1 |
| HEXAMETHONIUM BROMIDE       | PC3    | 0.485557186 | 1 |
| NAFCILLIN                   | HL60   | 0.485737496 | 1 |
| CARBINOXAMINE               | MCF7   | 0.48691114  | 1 |
| RALOXIFENE                  | PC3    | 0.487844318 | 1 |
| PRESTWICK-664               | MCF7   | 0.487941254 | 1 |

|                          |      |             |   |
|--------------------------|------|-------------|---|
| TRIOXYSALEN              | MCF7 | 0.487995132 | 1 |
| GUANFACINE               | PC3  | 0.488419387 | 1 |
| CP-690334-01             | MCF7 | 0.489206215 | 1 |
| L-METHIONINE SULFOXIMINE | PC3  | 0.48976201  | 1 |
| PRESTWICK-691            | MCF7 | 0.489893871 | 1 |
| 6-BENZYLAMINOPURINE      | MCF7 | 0.48993467  | 1 |
| REPAGLINIDE              | PC3  | 0.49014582  | 1 |
| PRESTWICK-984            | MCF7 | 0.490979857 | 1 |
| PROTOVERATRINE A         | PC3  | 0.492258371 | 1 |
| TRIAMTERENE              | PC3  | 0.492338343 | 1 |
| MECLOCYCLINE             | MCF7 | 0.493153965 | 1 |
| THALIDOMIDE              | HL60 | 0.493219508 | 1 |
| VALPROIC ACID            | MCF7 | 0.493773517 | 1 |
| CINNARIZINE              | PC3  | 0.493988813 | 1 |
| AJMALINE                 | HL60 | 0.494181194 | 1 |
| DIPHENYLPYRALINE         | PC3  | 0.494242076 | 1 |
| CYCLIZINE                | MCF7 | 0.494514213 | 1 |
| RAMIFENAZONE             | PC3  | 0.494566021 | 1 |
| MEFENAMIC ACID           | MCF7 | 0.495875546 | 1 |
| DIMENHYDRINATE           | MCF7 | 0.496147942 | 1 |
| MOLINDONE                | PC3  | 0.496298812 | 1 |
| GUANETHIDINE             | PC3  | 0.496684113 | 1 |
| N-ACETYL-L-ASPARTIC ACID | MCF7 | 0.496692862 | 1 |
| MEPHENESIN               | MCF7 | 0.497783214 | 1 |
| RAUBASINE                | HL60 | 0.498033337 | 1 |
| CANRENOIC ACID           | MCF7 | 0.498328644 | 1 |
| BUFLOMEDIL               | PC3  | 0.49841902  | 1 |
| FLUFENAMIC ACID          | PC3  | 0.498601422 | 1 |
| STOCK1N-35874            | PC3  | 0.499420009 | 1 |
| CLONIDINE                | HL60 | 0.499769572 | 1 |
| MEBEVERINE               | HL60 | 0.500348692 | 1 |
| FLORFENICOL              | MCF7 | 0.500512042 | 1 |
| TAMOXIFEN                | PC3  | 0.501121143 | 1 |
| CALCIUM PANTOTHENATE     | PC3  | 0.501314307 | 1 |
| JOSAMYCIN                | MCF7 | 0.501604737 | 1 |
| GABEXATE                 | PC3  | 0.501700697 | 1 |
| PIPEMIDIC ACID           | MCF7 | 0.502087169 | 1 |
| DIPHEMANIL METILSULFATE  | PC3  | 0.502424689 | 1 |
| BENZAMIL                 | PC3  | 0.502424689 | 1 |
| BACITRACIN               | HL60 | 0.502473722 | 1 |
| EPITIOSTANOL             | MCF7 | 0.502971527 | 1 |
| NORCYCLOBENZAPRINE       | PC3  | 0.503053705 | 1 |
| CHLORAMBUCIL             | MCF7 | 0.504339329 | 1 |
| NIMODIPINE               | HL60 | 0.504601212 | 1 |
| NIALAMIDE                | PC3  | 0.50461301  | 1 |
| CEFEPIME                 | HL60 | 0.504794741 | 1 |
| PIPEMIDIC ACID           | PC3  | 0.505181858 | 1 |
| CEFMETAZOLE              | MCF7 | 0.505434292 | 1 |
| STOCK1N-35215            | PC3  | 0.506255931 | 1 |
| ISOFLUPREDONE            | PC3  | 0.506343685 | 1 |
| FUSIDIC ACID             | PC3  | 0.507312415 | 1 |
| KHELLIN                  | PC3  | 0.507352    | 1 |
| ETHOXYQUIN               | PC3  | 0.507626115 | 1 |
| BENDROFLUMETHIAZIDE      | HL60 | 0.508281632 | 1 |
| CEFOXITIN                | PC3  | 0.508475534 | 1 |
| PRONETALOL               | MCF7 | 0.509271617 | 1 |
| PRESTWICK-692            | PC3  | 0.509639346 | 1 |
| NIFEDIPINE               | MCF7 | 0.509664384 | 1 |
| SANTONIN                 | PC3  | 0.510369385 | 1 |
| PRIMIDONE                | MCF7 | 0.510643922 | 1 |
| NABUMETONE               | PC3  | 0.510803846 | 1 |

|                         |      |             |   |
|-------------------------|------|-------------|---|
| CARBACHOL               | PC3  | 0.511192163 | 1 |
| SULCONAZOLE             | PC3  | 0.51138635  | 1 |
| MYCOPHENOLIC ACID       | PC3  | 0.511969024 | 1 |
| MOXISYLYTE              | PC3  | 0.512017172 | 1 |
| NIFENAZONE              | MCF7 | 0.513391355 | 1 |
| AZAPROPAZONE            | HL60 | 0.513523639 | 1 |
| LORACARBEF              | PC3  | 0.514690373 | 1 |
| PROXYMETACAINE          | MCF7 | 0.514766459 | 1 |
| PYRVINIUM               | PC3  | 0.51546856  | 1 |
| PRILOCAINE              | HL60 | 0.515663152 | 1 |
| SIMVASTATIN             | PC3  | 0.515857762 | 1 |
| KETOCONAZOLE            | MCF7 | 0.515867196 | 1 |
| 3-HYDROXY-DL-KYNURENINE | MCF7 | 0.515884409 | 1 |
| ARACHIDONIC ACID        | MCF7 | 0.516056651 | 1 |
| GW-8510                 | MCF7 | 0.51641778  | 1 |
| PHENSUXIMIDE            | MCF7 | 0.517243925 | 1 |
| DIZOCILPINE             | MCF7 | 0.517519377 | 1 |
| VERTEPORFIN             | MCF7 | 0.517519377 | 1 |
| CEFALEXIN               | MCF7 | 0.517743204 | 1 |
| HELIOTRINE              | PC3  | 0.517794865 | 1 |
| PF-00539745-00          | PC3  | 0.518070388 | 1 |
| 0317956-0000            | MCF7 | 0.518611522 | 1 |
| METIXENE                | MCF7 | 0.518621539 | 1 |
| FLAVOXATE               | MCF7 | 0.51917283  | 1 |
| BETAMETHASONE           | MCF7 | 0.519753684 | 1 |
| PROCYCLIDINE            | MCF7 | 0.520000027 | 1 |
| CLORSULON               | HL60 | 0.521118902 | 1 |
| STOCK1N-35696           | PC3  | 0.522094568 | 1 |
| ERYTHROMYCIN            | MCF7 | 0.522483466 | 1 |
| AMODIAQUINE             | HL60 | 0.523070656 | 1 |
| SB-202190               | MCF7 | 0.5232617   | 1 |
| METHOXSALEN             | PC3  | 0.523265923 | 1 |
| PRESTWICK-972           | MCF7 | 0.523461207 | 1 |
| FIPEXIDE                | PC3  | 0.523656508 | 1 |
| SULFAFURAZOLE           | HL60 | 0.524047159 | 1 |
| MORANTEL                | PC3  | 0.52441691  | 1 |
| DISULFIRAM              | PC3  | 0.52552246  | 1 |
| ZIDOVUDINE              | MCF7 | 0.525798929 | 1 |
| SCOPOLETIN              | MCF7 | 0.5258059   | 1 |
| MEGLUMINE               | PC3  | 0.526001397 | 1 |
| TRANLYCYPROMINE         | MCF7 | 0.526351963 | 1 |
| OXYMETAZOLINE           | MCF7 | 0.526392439 | 1 |
| SODIUM PHENYLBUTYRATE   | HL60 | 0.526628528 | 1 |
| CLIDINIUM BROMIDE       | MCF7 | 0.526905125 | 1 |
| GUAIFENESIN             | PC3  | 0.526905125 | 1 |
| URSODEOXYCHOLIC ACID    | PC3  | 0.527370325 | 1 |
| PNU-0251126             | PC3  | 0.527987021 | 1 |
| CAPTOPRIL               | MCF7 | 0.528288588 | 1 |
| TROPINE                 | PC3  | 0.52854431  | 1 |
| KETOTIFEN               | MCF7 | 0.528565375 | 1 |
| DOXEPIN                 | MCF7 | 0.528935764 | 1 |
| NILUTAMIDE              | MCF7 | 0.529395924 | 1 |
| MEPYRAMINE              | PC3  | 0.529523062 | 1 |
| RIFABUTIN               | MCF7 | 0.529672835 | 1 |
| PENTOLONIUM             | HL60 | 0.530893962 | 1 |
| CARCININE               | MCF7 | 0.531057854 | 1 |
| IC-86621                | PC3  | 0.531612075 | 1 |
| FLUTICASONE             | PC3  | 0.531873634 | 1 |
| PROTOVERATRINE A        | MCF7 | 0.532166416 | 1 |
| METOCLOPRAMIDE          | PC3  | 0.532166416 | 1 |
| EBSELEN                 | PC3  | 0.532265608 | 1 |



|                             |      |             |   |
|-----------------------------|------|-------------|---|
| FLUNIXIN                    | MCF7 | 0.532720878 | 1 |
| DIGOXIN                     | PC3  | 0.532853681 | 1 |
| RONIDAZOLE                  | PC3  | 0.533441888 | 1 |
| DEXIBUPROFEN                | MCF7 | 0.533830156 | 1 |
| KARAKOLINE                  | PC3  | 0.534107549 | 1 |
| PAPAVERINE                  | PC3  | 0.534618698 | 1 |
| VIDARABINE                  | MCF7 | 0.534662423 | 1 |
| CELECOXIB                   | PC3  | 0.535599772 | 1 |
| SR-95639A                   | PC3  | 0.536188589 | 1 |
| SB-203580                   | PC3  | 0.536327737 | 1 |
| ALPRENOLOL                  | MCF7 | 0.536605389 | 1 |
| (+)-ISOPRENALINE            | PC3  | 0.536973877 | 1 |
| GEMFIBROZIL                 | PC3  | 0.537994073 | 1 |
| GLYCOPYRRONIUM BROMIDE      | MCF7 | 0.537994073 | 1 |
| BETULINIC ACID              | HL60 | 0.53815223  | 1 |
| ISOTRETINOIN                | MCF7 | 0.538271893 | 1 |
| MECLOCYCLINE                | HL60 | 0.538348671 | 1 |
| PHA-00851261E               | MCF7 | 0.538577631 | 1 |
| PRAZIQUANTEL                | MCF7 | 0.538827616 | 1 |
| CHLORTETRACYCLINE           | MCF7 | 0.539105519 | 1 |
| PRASTERONE                  | PC3  | 0.539134572 | 1 |
| METHYLBENZETHONIUM CHLORIDE | MCF7 | 0.539439757 | 1 |
| SOLANINE                    | PC3  | 0.540117255 | 1 |
| OXOLINIC ACID               | PC3  | 0.540773507 | 1 |
| NADIDE                      | MCF7 | 0.541051599 | 1 |
| AZACITIDINE                 | PC3  | 0.542083626 | 1 |
| AZACYCLONOL                 | PC3  | 0.542164232 | 1 |
| CLEMIZOLE                   | HL60 | 0.542477059 | 1 |
| TRIHEXYPHENIDYL             | PC3  | 0.544051308 | 1 |
| NEOMYCIN                    | PC3  | 0.544112343 | 1 |
| CIPROFIBRATE                | MCF7 | 0.544390747 | 1 |
| LOBELINE                    | MCF7 | 0.54522611  | 1 |
| PROCYCLIDINE                | PC3  | 0.545232529 | 1 |
| BEPRIDIL                    | PC3  | 0.54562637  | 1 |
| PIRETANIDE                  | HL60 | 0.545823309 | 1 |
| HYDRASTINE HYDROCHLORIDE    | MCF7 | 0.546061699 | 1 |
| ILOPROST                    | MCF7 | 0.546340278 | 1 |
| SULFATHIAZOLE               | HL60 | 0.5464142   | 1 |
| OXYPHENBUTAZONE             | MCF7 | 0.546618881 | 1 |
| KETANSERIN                  | PC3  | 0.546808189 | 1 |
| MEPENZOLATE BROMIDE         | PC3  | 0.547176162 | 1 |
| 1,4-CHRYSENEQUINONE         | PC3  | 0.547202227 | 1 |
| TRIFLUSAL                   | MCF7 | 0.547454838 | 1 |
| GALANTAMINE                 | PC3  | 0.547596313 | 1 |
| CLOFILUM TOSYLATE           | MCF7 | 0.548291012 | 1 |
| SPIPERONE                   | PC3  | 0.549370292 | 1 |
| CIPROFLOXACIN               | MCF7 | 0.549685111 | 1 |
| GLIPIZIDE                   | MCF7 | 0.549964    | 1 |
| PRESTWICK-1085              | MCF7 | 0.550242913 | 1 |
| MYRICETIN                   | MCF7 | 0.55052185  | 1 |
| HYDROCORTISONE              | PC3  | 0.550947959 | 1 |
| KETOROLAC                   | MCF7 | 0.55107979  | 1 |
| TRICHLORMETHIAZIDE          | PC3  | 0.551145218 | 1 |
| FENOPROFEN                  | PC3  | 0.551358795 | 1 |
| PHENFORMIN                  | MCF7 | 0.552365064 | 1 |
| ETIDRONIC ACID              | MCF7 | 0.552475038 | 1 |
| TACROLIMUS                  | MCF7 | 0.552518296 | 1 |
| FLECAINIDE                  | MCF7 | 0.552860178 | 1 |
| DICOUMAROL                  | MCF7 | 0.553202093 | 1 |
| PRESTWICK-1083              | PC3  | 0.553513212 | 1 |
| ACONITINE                   | PC3  | 0.554302894 | 1 |

|                                |      |             |   |
|--------------------------------|------|-------------|---|
| PHENINDIONE                    | MCF7 | 0.554429314 | 1 |
| ATROPINE METHONITRATE          | MCF7 | 0.554895269 | 1 |
| CHLOROQUINE                    | PC3  | 0.555290239 | 1 |
| HYDROXYZINE                    | HL60 | 0.55548774  | 1 |
| NOSCAPINE                      | MCF7 | 0.555546517 | 1 |
| LABETALOL                      | MCF7 | 0.556105245 | 1 |
| PIPERIDOLATE                   | MCF7 | 0.55638464  | 1 |
| NIMESULIDE                     | PC3  | 0.5564754   | 1 |
| SCOPOLAMINE                    | PC3  | 0.556870537 | 1 |
| PRESTWICK-967                  | MCF7 | 0.556943491 | 1 |
| ROXARSONE                      | PC3  | 0.55706812  | 1 |
| IVERMECTIN                     | PC3  | 0.557502425 | 1 |
| PRILOCAINE                     | PC3  | 0.557502425 | 1 |
| MINAPRINE                      | PC3  | 0.557781922 | 1 |
| BUDESONIDE                     | MCF7 | 0.558620534 | 1 |
| BCB000040                      | PC3  | 0.558620534 | 1 |
| NITROFURAL                     | PC3  | 0.558846827 | 1 |
| NICERGOLINE                    | PC3  | 0.558900111 | 1 |
| PRESTWICK-689                  | MCF7 | 0.559179708 | 1 |
| BENZBROMARONE                  | PC3  | 0.559242204 | 1 |
| IOPANOIC ACID                  | PC3  | 0.560033075 | 1 |
| MEBEVERINE                     | PC3  | 0.560230817 | 1 |
| AMINOPHENAZONE                 | HL60 | 0.56062633  | 1 |
| PROPIDIUM IODIDE               | MCF7 | 0.561417175 | 1 |
| PRESTWICK-559                  | HL60 | 0.561417469 | 1 |
| DAPSONE                        | MCF7 | 0.561696943 | 1 |
| FLUVOXAMINE                    | PC3  | 0.561813094 | 1 |
| PROADIFEN                      | PC3  | 0.562208757 | 1 |
| TIMOLOL                        | MCF7 | 0.562331308 | 1 |
| DOXAZOSIN                      | PC3  | 0.562406602 | 1 |
| IFOSFAMIDE                     | MCF7 | 0.56253636  | 1 |
| ROLITETRACYCLINE               | PC3  | 0.562604456 | 1 |
| SUXIBUZONE                     | PC3  | 0.562802319 | 1 |
| DEPTROPINE                     | MCF7 | 0.562816202 | 1 |
| PF-00539745-00                 | MCF7 | 0.563000192 | 1 |
| ETHAMBUTOL                     | MCF7 | 0.563375941 | 1 |
| CYCLIC ADENOSINE MONOPHOSPHATE | MCF7 | 0.563655837 | 1 |
| SB-202190                      | PC3  | 0.563655837 | 1 |
| CHLORPHENESIN                  | MCF7 | 0.563935751 | 1 |
| VANCOMYCIN                     | MCF7 | 0.564215682 | 1 |
| DESOXYCORTONE                  | PC3  | 0.564583492 | 1 |
| ESTROPIPATE                    | MCF7 | 0.564775598 | 1 |
| HEXESTROL                      | MCF7 | 0.564775598 | 1 |
| PUROMYCIN                      | MCF7 | 0.565615601 | 1 |
| BUDESONIDE                     | PC3  | 0.566167348 | 1 |
| HEPTAMINOL                     | MCF7 | 0.566455757 | 1 |
| CROTAMITON                     | MCF7 | 0.566735842 | 1 |
| OXOLINIC ACID                  | MCF7 | 0.567296063 | 1 |
| MEMANTINE                      | PC3  | 0.567553664 | 1 |
| MERBROMIN                      | PC3  | 0.568696898 | 1 |
| ETANIDAZOLE                    | PC3  | 0.569336651 | 1 |
| ALVESPIMYCIN                   | MCF7 | 0.569792487 | 1 |
| FENBUFEN                       | HL60 | 0.570327473 | 1 |
| LOVASTATIN                     | MCF7 | 0.570378418 | 1 |
| DEXIBUPROFEN                   | PC3  | 0.57052566  | 1 |
| CORYNANTHINE                   | MCF7 | 0.570939047 | 1 |
| TERCONAZOLE                    | MCF7 | 0.571499735 | 1 |
| ROLIPRAM                       | MCF7 | 0.571780101 | 1 |
| AMIPRILOSE                     | PC3  | 0.571913178 | 1 |
| DICLOXACILLIN                  | PC3  | 0.572111424 | 1 |
| 4-HYDROXYPHENAZONE             | PC3  | 0.572340876 | 1 |

|                       |      |             |   |
|-----------------------|------|-------------|---|
| TRANLYCYPROMINE       | PC3  | 0.572621285 | 1 |
| ALCURONIUM CHLORIDE   | MCF7 | 0.573182146 | 1 |
| TROGLITAZONE          | PC3  | 0.573739144 | 1 |
| CAPSAICIN             | MCF7 | 0.574304034 | 1 |
| ISOFLUPREDONE         | MCF7 | 0.574490926 | 1 |
| PROFENAMINE           | PC3  | 0.574689262 | 1 |
| ELLIPTICINE           | PC3  | 0.575284311 | 1 |
| IOXAGLIC ACID         | MCF7 | 0.575426138 | 1 |
| ARTEMISININ           | MCF7 | 0.575482674 | 1 |
| TOCAINIDE             | PC3  | 0.576077801 | 1 |
| MINOCYCLINE           | MCF7 | 0.576404186 | 1 |
| HYOSCYAMINE           | MCF7 | 0.57654845  | 1 |
| BOLDINE               | MCF7 | 0.57682906  | 1 |
| CEFMETAZOLE           | PC3  | 0.576871393 | 1 |
| IDAZOXAN              | MCF7 | 0.577109682 | 1 |
| DEPTROPINE            | PC3  | 0.577268226 | 1 |
| CHICAGO SKY BLUE 6B   | MCF7 | 0.577951622 | 1 |
| GANCICLOVIR           | HL60 | 0.578260417 | 1 |
| FLUFENAMIC ACID       | HL60 | 0.578458873 | 1 |
| MOLSIDOMINE           | MCF7 | 0.57879367  | 1 |
| ALTRETAMINE           | MCF7 | 0.579635824 | 1 |
| FLECAINIDE            | PC3  | 0.579916564 | 1 |
| ARTICAINE             | MCF7 | 0.580245238 | 1 |
| LEVOBUNOLOL           | HL60 | 0.580443751 | 1 |
| ETODOLAC              | PC3  | 0.580478079 | 1 |
| ALEXIDINE             | MCF7 | 0.581237858 | 1 |
| HARMAN                | PC3  | 0.581833494 | 1 |
| GLIBENCLAMIDE         | HL60 | 0.582230611 | 1 |
| AMINOPHYLLINE         | PC3  | 0.583422084 | 1 |
| ASIATICOSIDE          | MCF7 | 0.583567167 | 1 |
| METHAZOLAMIDE         | PC3  | 0.584415112 | 1 |
| PANCURONIUM BROMIDE   | PC3  | 0.584613732 | 1 |
| THIETHYLPERAZINE      | MCF7 | 0.584971695 | 1 |
| ETHOTOIN              | PC3  | 0.585252628 | 1 |
| 3-ACETAMIDOCOUMARIN   | MCF7 | 0.585252628 | 1 |
| SALSOLINOL            | MCF7 | 0.585533571 | 1 |
| THIORIDAZINE          | HL60 | 0.586048797 | 1 |
| HARPAGOSIDE           | PC3  | 0.586202853 | 1 |
| MEPTAZINOL            | HL60 | 0.586401513 | 1 |
| DICLOFENAC            | MCF7 | 0.5867224   | 1 |
| TRIFLURIDINE          | PC3  | 0.587394876 | 1 |
| AZAPERONE             | MCF7 | 0.587500409 | 1 |
| HEXAMETHONIUM BROMIDE | MCF7 | 0.587781419 | 1 |
| PERPHENAZINE          | PC3  | 0.587781419 | 1 |
| NALIDIXIC ACID        | MCF7 | 0.588062437 | 1 |
| NABUMETONE            | HL60 | 0.588587045 | 1 |
| N-ACETYLMURAMIC ACID  | MCF7 | 0.588905538 | 1 |
| BETAZOLE              | HL60 | 0.589183181 | 1 |
| CORTICOSTERONE        | MCF7 | 0.589186586 | 1 |
| LACTOBIONIC ACID      | MCF7 | 0.589186586 | 1 |
| AMODIAQUINE           | PC3  | 0.589580623 | 1 |
| ETIDRONIC ACID        | HL60 | 0.58997808  | 1 |
| BUTOCONAZOLE          | PC3  | 0.590574292 | 1 |
| PROADIFEN             | MCF7 | 0.590591937 | 1 |
| IDAZOXAN              | PC3  | 0.591170534 | 1 |
| ETOFENAMATE           | PC3  | 0.591369288 | 1 |
| SULFAMETHIZOLE        | MCF7 | 0.59143523  | 1 |
| ZALCITABINE           | PC3  | 0.591568045 | 1 |
| (-)-MK-801            | MCF7 | 0.59171634  | 1 |
| DAPSONE               | PC3  | 0.592559709 | 1 |
| REMOXIPRIDE           | PC3  | 0.592760653 | 1 |

|                             |        |             |   |
|-----------------------------|--------|-------------|---|
| CHLORTETRACYCLINE           | HL60   | 0.593158213 | 1 |
| AR-A014418                  | MCF7   | 0.59435096  | 1 |
| TANESPIMYCIN                | MCF7   | 0.59436306  | 1 |
| CHRYSLIN                    | MCF7   | 0.594527772 | 1 |
| CLOXACILLIN                 | PC3    | 0.59454976  | 1 |
| DIPROPHYLLINE               | PC3    | 0.595090124 | 1 |
| TETROQUINONE                | MCF7   | 0.595090124 | 1 |
| PRESTWICK-1085              | HL60   | 0.595344987 | 1 |
| RETRORSINE                  | MCF7   | 0.595371307 | 1 |
| LISURIDE                    | PC3    | 0.595652495 | 1 |
| OXAMNIQUINE                 | PC3    | 0.595941432 | 1 |
| L-METHIONINE SULFOXIMINE    | HL60   | 0.596140252 | 1 |
| MECLOFENAMIC ACID           | PC3    | 0.596214884 | 1 |
| TRIMETHADIONE               | PC3    | 0.596339074 | 1 |
| PRIDINOL                    | PC3    | 0.596935552 | 1 |
| PROPAFENONE                 | MCF7   | 0.597058501 | 1 |
| ALPHA-YOHIMBINE             | PC3    | 0.597333215 | 1 |
| CALCIUM FOLINATE            | PC3    | 0.597339715 | 1 |
| ALPROSTADIL                 | MCF7   | 0.597396363 | 1 |
| LEVOTHYROXINE SODIUM        | HL60   | 0.597929724 | 1 |
| CYCLOPENTOLATE              | MCF7   | 0.598464609 | 1 |
| ROSIGLITAZONE               | PC3    | 0.599118666 | 1 |
| PILOCARPINE                 | MCF7   | 0.599308316 | 1 |
| CLEBOPRIDE                  | PC3    | 0.599321639 | 1 |
| NIFENAZONE                  | PC3    | 0.599870803 | 1 |
| SISOMICIN                   | MCF7   | 0.599870803 | 1 |
| ACETOHEXAMIDE               | PC3    | 0.600117054 | 1 |
| SOTALOL                     | PC3    | 0.600315912 | 1 |
| HYDROXYZINE                 | MCF7   | 0.600714554 | 1 |
| PRIMAQUINE                  | PC3    | 0.601707948 | 1 |
| SPARTEINE                   | MCF7   | 0.602402121 | 1 |
| ALPHA-ESTRADIOL             | ssMCF7 | 0.603497781 | 1 |
| HARMALOL                    | MCF7   | 0.603527203 | 1 |
| TUBOCURARINE CHLORIDE       | MCF7   | 0.603808477 | 1 |
| BENFLUOREX                  | MCF7   | 0.604652305 | 1 |
| NAFTIFINE                   | PC3    | 0.604691034 | 1 |
| VANOXERINE                  | MCF7   | 0.605214861 | 1 |
| ADIPIODONE                  | MCF7   | 0.60662126  | 1 |
| PINACIDIL                   | PC3    | 0.606679817 | 1 |
| METACYCLINE                 | PC3    | 0.607077574 | 1 |
| OXYBUTYNIN                  | MCF7   | 0.6074651   | 1 |
| BENFLUOREX                  | HL60   | 0.607674209 | 1 |
| HYDRALAZINE                 | PC3    | 0.607746379 | 1 |
| PRAMOCAINE                  | HL60   | 0.608469719 | 1 |
| METOPROLOL                  | MCF7   | 0.609152765 | 1 |
| ARACHIDONYLTRIFLUOROMETHANE | MCF7   | 0.60943404  | 1 |
| NAPROXEN                    | MCF7   | 0.609514519 | 1 |
| OXPRENOLOL                  | MCF7   | 0.609715313 | 1 |
| HESPERIDIN                  | HL60   | 0.609861844 | 1 |
| BETAZOLE                    | PC3    | 0.609996584 | 1 |
| ALEXIDINE                   | PC3    | 0.611121655 | 1 |
| XYLOMETAZOLINE              | PC3    | 0.611651665 | 1 |
| CLIDINIUM BROMIDE           | PC3    | 0.612049392 | 1 |
| NAFTIFINE                   | MCF7   | 0.612246694 | 1 |
| MEDRYSONE                   | PC3    | 0.612527948 | 1 |
| ETAMSYLATE                  | PC3    | 0.613242543 | 1 |
| (-)-CATECHIN                | MCF7   | 0.613640249 | 1 |
| CHLORPHENAMINE              | MCF7   | 0.614496645 | 1 |
| ETACRYNIC ACID              | PC3    | 0.614634485 | 1 |
| DIPYRIDAMOLE                | PC3    | 0.614777875 | 1 |
| ROLIPRAM                    | PC3    | 0.615032168 | 1 |

|                       |      |             |   |
|-----------------------|------|-------------|---|
| IPRONIAZID            | MCF7 | 0.616183968 | 1 |
| FLECAINIDE            | HL60 | 0.616622822 | 1 |
| (+)-CHELIDONINE       | HL60 | 0.617020464 | 1 |
| QUINOSTATIN           | MCF7 | 0.617308767 | 1 |
| INDAPAMIDE            | MCF7 | 0.617721357 | 1 |
| IMIPRAMINE            | PC3  | 0.617815722 | 1 |
| BETAZOLE              | MCF7 | 0.618152318 | 1 |
| FURALTADONE           | HL60 | 0.618412139 | 1 |
| CYANOCOBALAMIN        | PC3  | 0.618809738 | 1 |
| ALSTERPAULLONE        | MCF7 | 0.619207326 | 1 |
| NOMIFENSINE           | PC3  | 0.619558133 | 1 |
| SUPROFEN              | PC3  | 0.619803687 | 1 |
| LANSOPRAZOLE          | MCF7 | 0.620120421 | 1 |
| MONOBENZONE           | PC3  | 0.621195094 | 1 |
| GLIQUIDONE            | HL60 | 0.621393854 | 1 |
| ESTRADIOL             | HL60 | 0.621516231 | 1 |
| CHENODEOXYCHOLIC ACID | MCF7 | 0.621807137 | 1 |
| KETOROLAC             | PC3  | 0.621990114 | 1 |
| LEVOTHYROXINE SODIUM  | PC3  | 0.622387605 | 1 |
| METHACHOLINE CHLORIDE | MCF7 | 0.622650407 | 1 |
| ISRADIPINE            | MCF7 | 0.622931483 | 1 |
| BETULIN               | MCF7 | 0.622931483 | 1 |
| PENTAMIDINE           | PC3  | 0.623182543 | 1 |
| TRIMETHOPRIM          | MCF7 | 0.623212552 | 1 |
| SULFAMETOXYDIAZINE    | MCF7 | 0.623493614 | 1 |
| DIETHYLSTILBESTROL    | MCF7 | 0.623575031 | 1 |
| DIFLORASONE           | MCF7 | 0.623774668 | 1 |
| DENATONIUM BENZOATE   | PC3  | 0.623778709 | 1 |
| BACAMPICILLIN         | MCF7 | 0.624336754 | 1 |
| QUINETHAZONE          | PC3  | 0.624336754 | 1 |
| PRESTWICK-972         | PC3  | 0.624573544 | 1 |
| PAROXETINE            | MCF7 | 0.624617786 | 1 |
| DICLOFENAMIDE         | PC3  | 0.625169629 | 1 |
| GENTAMICIN            | PC3  | 0.625460832 | 1 |
| COLISTIN              | MCF7 | 0.625741831 | 1 |
| CLOPAMIDE             | MCF7 | 0.626022822 | 1 |
| HARPAGOSIDE           | MCF7 | 0.626303804 | 1 |
| PROPANTHELINE BROMIDE | PC3  | 0.627354952 | 1 |
| 0179445-0000          | MCF7 | 0.627409714 | 1 |
| THALIDOMIDE           | PC3  | 0.627708583 | 1 |
| KINETIN               | MCF7 | 0.627989511 | 1 |
| BENZBROMARONE         | HL60 | 0.628546718 | 1 |
| GEMFIBROZIL           | MCF7 | 0.628832239 | 1 |
| THIAMPHENICOL         | PC3  | 0.62939401  | 1 |
| OXPRENOLOL            | PC3  | 0.629539724 | 1 |
| CEFORANIDE            | MCF7 | 0.62967488  | 1 |
| PIRLINDOLE            | HL60 | 0.630135468 | 1 |
| FOLIC ACID            | HL60 | 0.630334039 | 1 |
| MILRINONE             | MCF7 | 0.630798258 | 1 |
| APRAMYCIN             | PC3  | 0.63112827  | 1 |
| AMPYRONE              | PC3  | 0.631359884 | 1 |
| ALVERINE              | PC3  | 0.63164068  | 1 |
| COTININE              | PC3  | 0.631921466 | 1 |
| FENOTEROL             | HL60 | 0.632319453 | 1 |
| PYRVINIUM             | MCF7 | 0.632573959 | 1 |
| METERGOLINE           | PC3  | 0.633311951 | 1 |
| CLORGILINE            | PC3  | 0.633510433 | 1 |
| MOLINDONE             | MCF7 | 0.633605941 | 1 |
| PAROMOMYCIN           | PC3  | 0.633708909 | 1 |
| DINOPROSTONE          | MCF7 | 0.633886646 | 1 |
| PROCAINAMIDE          | PC3  | 0.634105844 | 1 |

|                          |        |             |   |
|--------------------------|--------|-------------|---|
| CLORSULON                | PC3    | 0.634304302 | 1 |
| GALANTAMINE              | MCF7   | 0.635289987 | 1 |
| APRAMYCIN                | MCF7   | 0.635570618 | 1 |
| SANGUINARINE             | MCF7   | 0.635891743 | 1 |
| HNMPA-(AM)3              | PC3    | 0.636090145 | 1 |
| ISOCARBOXAZID            | MCF7   | 0.636693012 | 1 |
| CONVOLAMINE              | MCF7   | 0.636973578 | 1 |
| TROGLITAZONE             | SKMEL5 | 0.637082054 | 1 |
| FLUTAMIDE                | MCF7   | 0.63725413  | 1 |
| MITOXANTRONE             | PC3    | 0.637478771 | 1 |
| LORGLUMIDE               | PC3    | 0.637677119 | 1 |
| VINPOCETINE              | MCF7   | 0.637815193 | 1 |
| HEMICHOLINIUM            | MCF7   | 0.637815193 | 1 |
| CORBADRINE               | MCF7   | 0.638095705 | 1 |
| QUIPAZINE                | PC3    | 0.638470443 | 1 |
| SULFAMERAZINE            | MCF7   | 0.639051503 | 1 |
| NOVOBIOCIN               | HL60   | 0.639065362 | 1 |
| BETONICINE               | PC3    | 0.639217609 | 1 |
| BUFLOMEDIL               | MCF7   | 0.640619663 | 1 |
| CROMOGLICIC ACID         | MCF7   | 0.640651493 | 1 |
| MECAMYLAMINE             | MCF7   | 0.641180381 | 1 |
| TROPINE                  | MCF7   | 0.641741037 | 1 |
| CHLORPROPAMIDE           | PC3    | 0.642237142 | 1 |
| CP-944629                | MCF7   | 0.64230163  | 1 |
| PHENOXYBENZAMINE         | PC3    | 0.642435313 | 1 |
| CLONIDINE                | MCF7   | 0.643702835 | 1 |
| DELSOLINE                | PC3    | 0.643822285 | 1 |
| FENBENDAZOLE             | PC3    | 0.644263203 | 1 |
| FELBINAC                 | HL60   | 0.644812733 | 1 |
| CYPROHEPTADINE           | PC3    | 0.644823504 | 1 |
| CROTAMITON               | HL60   | 0.645604938 | 1 |
| PREDNISONE               | HL60   | 0.646000989 | 1 |
| ALFADOLONE               | PC3    | 0.646199001 | 1 |
| ESTRIOL                  | MCF7   | 0.646223956 | 1 |
| VINCAMINE                | PC3    | 0.646223956 | 1 |
| ALVERINE                 | HL60   | 0.646397005 | 1 |
| PIZOTIFEN                | MCF7   | 0.646784014 | 1 |
| EMETINE                  | HL60   | 0.646990962 | 1 |
| VINBLASTINE              | MCF7   | 0.647064017 | 1 |
| N-ACETYL-L-ASPARTIC ACID | PC3    | 0.647386889 | 1 |
| ALCLOMETASONE            | MCF7   | 0.647903916 | 1 |
| TETROQUINONE             | HL60   | 0.648178633 | 1 |
| LITHOCHOLIC ACID         | MCF7   | 0.648432079 | 1 |
| SULFATHIAZOLE            | MCF7   | 0.648463757 | 1 |
| TOLMETIN                 | PC3    | 0.64857445  | 1 |
| PHENANTHRIDINONE         | MCF7   | 0.64897023  | 1 |
| R-ATENOLOL               | PC3    | 0.649168105 | 1 |
| SCOULERINE               | MCF7   | 0.64986303  | 1 |
| LUMICOLCHICINE           | PC3    | 0.650552966 | 1 |
| CLOPAMIDE                | PC3    | 0.651146332 | 1 |
| FOLIOSIDINE              | PC3    | 0.651261822 | 1 |
| 0173570-0000             | MCF7   | 0.651541521 | 1 |
| ISOCORYDINE              | MCF7   | 0.6518212   | 1 |
| FLUNISOLIDE              | MCF7   | 0.651859033 | 1 |
| DISOPYRAMIDE             | HL60   | 0.652925887 | 1 |
| RIBAVIRIN                | MCF7   | 0.652939712 | 1 |
| PHENACETIN               | PC3    | 0.653321231 | 1 |
| SPIRADOLINE              | PC3    | 0.653498845 | 1 |
| TENOXICAM                | PC3    | 0.653518888 | 1 |
| ADIPHENINE               | MCF7   | 0.65377838  | 1 |
| MOXONIDINE               | PC3    | 0.654111794 | 1 |

|                          |      |             |   |
|--------------------------|------|-------------|---|
| AMINOCAPROIC ACID        | MCF7 | 0.654309408 | 1 |
| PHA-00745360             | PC3  | 0.654370496 | 1 |
| MIFEPRISTONE             | MCF7 | 0.654616857 | 1 |
| NAPHAZOLINE              | PC3  | 0.655175735 | 1 |
| MAFENIDE                 | PC3  | 0.656013888 | 1 |
| CEFSULODIN               | PC3  | 0.65608745  | 1 |
| PRESTWICK-692            | MCF7 | 0.656572547 | 1 |
| QUINIDINE                | PC3  | 0.657272315 | 1 |
| METHOXAMINE              | MCF7 | 0.657410366 | 1 |
| OXEDRINE                 | MCF7 | 0.657689594 | 1 |
| PREDNICARBATE            | MCF7 | 0.657968799 | 1 |
| TERFENADINE              | MCF7 | 0.658247981 | 1 |
| ALTRETAMINE              | PC3  | 0.658259391 | 1 |
| XYLAZINE                 | PC3  | 0.659838107 | 1 |
| METHOCARBAMOL            | MCF7 | 0.660201598 | 1 |
| LUTEOLIN                 | PC3  | 0.660232667 | 1 |
| IDOXURIDINE              | PC3  | 0.660759559 | 1 |
| PREGNENOLONE             | HL60 | 0.660824417 | 1 |
| TRIMIPRAMINE             | PC3  | 0.661021643 | 1 |
| FLUOROCURARINE           | MCF7 | 0.661038504 | 1 |
| TILETAMINE               | HL60 | 0.661416058 | 1 |
| CHLORPROMAZINE           | PC3  | 0.661873219 | 1 |
| MIDECAMYCIN              | MCF7 | 0.662990421 | 1 |
| FINASTERIDE              | MCF7 | 0.663145176 | 1 |
| PROXYPHYLLINE            | MCF7 | 0.663269166 | 1 |
| S-PROPRANOLOL            | PC3  | 0.663387385 | 1 |
| PHENINDIONE              | HL60 | 0.663584448 | 1 |
| DIZOCILPINE              | PC3  | 0.664105247 | 1 |
| DIPHENYLPYRALINE         | MCF7 | 0.664738039 | 1 |
| MOROXYDINE               | HL60 | 0.664963529 | 1 |
| EDROPHONIUM CHLORIDE     | HL60 | 0.665357434 | 1 |
| NAFTIDROFURYL            | MCF7 | 0.665498196 | 1 |
| SULOCTIDIL               | HL60 | 0.665948193 | 1 |
| GUANADREL                | PC3  | 0.666055191 | 1 |
| ANTIMYCIN A              | MCF7 | 0.666333648 | 1 |
| CYCLOSERINE              | PC3  | 0.666735683 | 1 |
| ZARDAVERINE              | MCF7 | 0.667168857 | 1 |
| ETIOCHOLANOLONE          | HL60 | 0.667326159 | 1 |
| APIGENIN                 | PC3  | 0.667719741 | 1 |
| DILTIAZEM                | MCF7 | 0.667725526 | 1 |
| ALCLOMETASONE            | PC3  | 0.667916511 | 1 |
| TICLOPIDINE              | PC3  | 0.66800382  | 1 |
| PHENYLPROPANOLAMINE      | PC3  | 0.668506739 | 1 |
| IOBENGUANE               | MCF7 | 0.668560323 | 1 |
| DIHYDROERGOTAMINE        | MCF7 | 0.669116715 | 1 |
| CALYCANTHINE             | PC3  | 0.669293513 | 1 |
| PRESTWICK-685            | MCF7 | 0.669394868 | 1 |
| NAPELLINE                | MCF7 | 0.669951089 | 1 |
| XAMOTEROL                | MCF7 | 0.670785206 | 1 |
| GALLAMINE TRIETHIODIDE   | PC3  | 0.671063187 | 1 |
| OXYBUTYNIN               | PC3  | 0.67125945  | 1 |
| CARBIMAZOLE              | MCF7 | 0.671619062 | 1 |
| N-PHENYLANTHRANILIC ACID | MCF7 | 0.671848948 | 1 |
| HYDRASTININE             | PC3  | 0.672174818 | 1 |
| BROMOPRIDE               | MCF7 | 0.67223531  | 1 |
| MIANSERIN                | HL60 | 0.672634737 | 1 |
| NORTRIPTYLINE            | MCF7 | 0.672730456 | 1 |
| CLENBUTEROL              | MCF7 | 0.672915848 | 1 |
| Y-27632                  | MCF7 | 0.673285974 | 1 |
| TOBRAMYCIN               | MCF7 | 0.673563688 | 1 |
| PANCURONIUM BROMIDE      | MCF7 | 0.673841371 | 1 |

|                     |        |             |   |
|---------------------|--------|-------------|---|
| DECITABINE          | MCF7   | 0.674009292 | 1 |
| GLICLAZIDE          | PC3    | 0.674598158 | 1 |
| PHYSOSTIGMINE       | MCF7   | 0.675229327 | 1 |
| PRILOCAINE          | MCF7   | 0.675296297 | 1 |
| METAMPICILLIN       | MCF7   | 0.675506825 | 1 |
| ETHOSUXIMIDE        | PC3    | 0.676616504 | 1 |
| OXYTETRACYCLINE     | PC3    | 0.677148292 | 1 |
| ETOFYLLINE          | MCF7   | 0.678280065 | 1 |
| BECLOMETASONE       | MCF7   | 0.678520325 | 1 |
| PRESTWICK-642       | PC3    | 0.678716264 | 1 |
| FLUMETASONE         | MCF7   | 0.678806078 | 1 |
| VALPROIC ACID       | PC3    | 0.678992078 | 1 |
| MEXILETINE          | MCF7   | 0.679032338 | 1 |
| CLEMIZOLE           | PC3    | 0.679111407 | 1 |
| MIANSERIN           | MCF7   | 0.679388455 | 1 |
| ADENOSINE PHOSPHATE | PC3    | 0.679499858 | 1 |
| RALOXIFENE          | ssMCF7 | 0.68008738  | 1 |
| DIHYDROERGOTAMINE   | HL60   | 0.680478977 | 1 |
| ZIMELDINE           | PC3    | 0.680496315 | 1 |
| BUPROPION           | HL60   | 0.680870507 | 1 |
| ACEMETACIN          | HL60   | 0.681066246 | 1 |
| TRANEXAMIC ACID     | PC3    | 0.681326856 | 1 |
| HARMOL              | MCF7   | 0.681603635 | 1 |
| TERCONAZOLE         | PC3    | 0.681849034 | 1 |
| RIBOFLAVIN          | MCF7   | 0.68188038  | 1 |
| QUINISOCAINE        | MCF7   | 0.682157091 | 1 |
| ACECLOFENAC         | MCF7   | 0.682987016 | 1 |
| AMPHOTERICIN B      | PC3    | 0.683413784 | 1 |
| TONZONIUM BROMIDE   | PC3    | 0.684195739 | 1 |
| PROPYLTHIOURACIL    | MCF7   | 0.684369524 | 1 |
| ZIDOVUDINE          | HL60   | 0.68478202  | 1 |
| BCB000039           | PC3    | 0.685198603 | 1 |
| PRESTWICK-857       | PC3    | 0.685368139 | 1 |
| ADRENOSTERONE       | PC3    | 0.685563477 | 1 |
| MEPRYLCAINE         | HL60   | 0.68614938  | 1 |
| CLEMASTINE          | HL60   | 0.686539891 | 1 |
| 3-ACETAMIDOCOUMARIN | PC3    | 0.687125521 | 1 |
| PROBUCOL            | PC3    | 0.687320694 | 1 |
| FLUMEQUINE          | MCF7   | 0.68740789  | 1 |
| TRIMETHOBENZAMIDE   | MCF7   | 0.687959845 | 1 |
| HYDROCORTISONE      | MCF7   | 0.688235766 | 1 |
| HYDROFLUMETHIAZIDE  | MCF7   | 0.68851165  | 1 |
| ENILCONAZOLE        | HL60   | 0.6892714   | 1 |
| ABAMECTIN           | MCF7   | 0.689890504 | 1 |
| SPECTINOMYCIN       | MCF7   | 0.690441779 | 1 |
| PF-00539758-00      | PC3    | 0.691268402 | 1 |
| PRESTWICK-981       | MCF7   | 0.691543866 | 1 |
| HALOPERIDOL         | MCF7   | 0.691569378 | 1 |
| CINCHOCAINE         | HL60   | 0.691609742 | 1 |
| AR-A014418          | PC3    | 0.69181929  | 1 |
| ALIMEMAZINE         | MCF7   | 0.692094676 | 1 |
| COLFORSIN           | PC3    | 0.692370022 | 1 |
| IKARUGAMYCIN        | MCF7   | 0.692565063 | 1 |
| PENTETRAZOL         | PC3    | 0.69316708  | 1 |
| MEFLOQUINE          | MCF7   | 0.693195823 | 1 |
| DISULFIRAM          | HL60   | 0.693361658 | 1 |
| PENTETIC ACID       | PC3    | 0.694139771 | 1 |
| CEFALOTIN           | PC3    | 0.694334248 | 1 |
| ERASTIN             | MCF7   | 0.69457136  | 1 |
| VIGABATRIN          | PC3    | 0.694723144 | 1 |
| NATAMYCIN           | PC3    | 0.695306334 | 1 |



|                        |      |             |   |
|------------------------|------|-------------|---|
| CHLORHEXIDINE          | PC3  | 0.695671062 | 1 |
| CINCHONIDINE           | PC3  | 0.695889341 | 1 |
| DINOPROSTONE           | PC3  | 0.695945885 | 1 |
| LOBELINE               | PC3  | 0.69627791  | 1 |
| BENZONATATE            | MCF7 | 0.696495408 | 1 |
| SULFACETAMIDE          | PC3  | 0.696770107 | 1 |
| PINDOLOL               | MCF7 | 0.696770107 | 1 |
| PROGLUMIDE             | MCF7 | 0.697044765 | 1 |
| PIRIBEDIL              | MCF7 | 0.697593955 | 1 |
| PRESTWICK-665          | PC3  | 0.698142978 | 1 |
| VITEXIN                | PC3  | 0.698413549 | 1 |
| S-PROPRANOLOL          | MCF7 | 0.698417425 | 1 |
| OLEANDOMYCIN           | MCF7 | 0.698966194 | 1 |
| METHOXAMINE            | PC3  | 0.699189513 | 1 |
| LIOTHYRONINE           | MCF7 | 0.699240514 | 1 |
| CYTOCHALASIN B         | MCF7 | 0.699577367 | 1 |
| OCTOPAMINE             | HL60 | 0.700158987 | 1 |
| LANATOSIDE C           | MCF7 | 0.700304437 | 1 |
| SULFABENZAMIDE         | PC3  | 0.700352817 | 1 |
| TRIFLURIDINE           | MCF7 | 0.701159551 | 1 |
| HYDRASTININE           | HL60 | 0.701321642 | 1 |
| JOSAMYCIN              | PC3  | 0.701707456 | 1 |
| PRESTWICK-559          | MCF7 | 0.702528983 | 1 |
| OXYBUTYNIN             | HL60 | 0.702677075 | 1 |
| HEPTAMINOL             | PC3  | 0.702802736 | 1 |
| BROMOCRIPTINE          | HL60 | 0.70287062  | 1 |
| CLIOQUINOL             | HL60 | 0.703064142 | 1 |
| LEVOPROPOXYPHENE       | MCF7 | 0.703076445 | 1 |
| MAPROTILINE            | MCF7 | 0.703623729 | 1 |
| FAMOTIDINE             | HL60 | 0.703838008 | 1 |
| MELATONIN              | MCF7 | 0.703897304 | 1 |
| GLIPIZIDE              | PC3  | 0.704444318 | 1 |
| DOSULEPIN              | PC3  | 0.704611514 | 1 |
| NITRENDIPINE           | PC3  | 0.704998131 | 1 |
| DIETHYLSTILBESTROL     | HL60 | 0.705191406 | 1 |
| SULFAPYRIDINE          | PC3  | 0.705771091 | 1 |
| MYCOPHENOLIC ACID      | MCF7 | 0.706357432 | 1 |
| PHENAZOPYRIDINE        | MCF7 | 0.70663055  | 1 |
| PROGESTERONE           | PC3  | 0.70692984  | 1 |
| METARAMINOL            | MCF7 | 0.707722555 | 1 |
| GLIQUIDONE             | PC3  | 0.707894824 | 1 |
| 4-HYDROXYPHENAZONE     | MCF7 | 0.70799544  | 1 |
| CARMUSTINE             | MCF7 | 0.70881381  | 1 |
| SPIRADOLINE            | MCF7 | 0.709086505 | 1 |
| NOMIFENSINE            | HL60 | 0.709630309 | 1 |
| RONIDAZOLE             | MCF7 | 0.710401015 | 1 |
| METOCLOPRAMIDE         | MCF7 | 0.71134796  | 1 |
| CHLORZOXAZONE          | PC3  | 0.711748819 | 1 |
| BW-B70C                | MCF7 | 0.712133686 | 1 |
| PIOGLITAZONE           | PC3  | 0.712339898 | 1 |
| GLIMEPIRIDE            | MCF7 | 0.712355091 | 1 |
| ASCORBIC ACID          | MCF7 | 0.712899172 | 1 |
| DROPROPIZINE           | PC3  | 0.712903126 | 1 |
| TALAMPICILLIN          | PC3  | 0.713287697 | 1 |
| NICOTINIC ACID         | MCF7 | 0.713443054 | 1 |
| ISOCARBOXAZID          | HL60 | 0.71405654  | 1 |
| SULFANILAMIDE          | PC3  | 0.71463291  | 1 |
| ARTEMISININ            | PC3  | 0.71501703  | 1 |
| METHYLDOPATE           | MCF7 | 0.715616581 | 1 |
| SULFAMETHOXYPYRIDAZINE | PC3  | 0.715784967 | 1 |
| BACAMPICILLIN          | HL60 | 0.715976888 | 1 |

|                           |      |             |   |
|---------------------------|------|-------------|---|
| SULFADOXINE               | PC3  | 0.716168783 | 1 |
| METRONIDAZOLE             | PC3  | 0.716702127 | 1 |
| CEFAZOLIN                 | PC3  | 0.716973385 | 1 |
| KINETIN                   | PC3  | 0.717319615 | 1 |
| SR-95531                  | MCF7 | 0.717515747 | 1 |
| IPRATROPIUM BROMIDE       | PC3  | 0.717703019 | 1 |
| PIVMECILLINAM             | MCF7 | 0.71778685  | 1 |
| ONDANSETRON               | PC3  | 0.717894682 | 1 |
| OXYBUPROCAINE             | MCF7 | 0.718057901 | 1 |
| EUCATROPINE               | MCF7 | 0.718224095 | 1 |
| SULOCTIDIL                | MCF7 | 0.719412371 | 1 |
| TOLNAFTATE                | MCF7 | 0.719683107 | 1 |
| BCB000038                 | MCF7 | 0.719683107 | 1 |
| NOVOBIOCIN                | MCF7 | 0.720650342 | 1 |
| TRAPIDIL                  | MCF7 | 0.720765521 | 1 |
| APOMORPHINE               | PC3  | 0.721306408 | 1 |
| CHLORPHENAMINE            | PC3  | 0.722295653 | 1 |
| ETHOTOIN                  | MCF7 | 0.722311793 | 1 |
| ARECOLINE                 | HL60 | 0.722677676 | 1 |
| ACICLOVIR                 | PC3  | 0.723197809 | 1 |
| TORASEMIDE                | PC3  | 0.724395428 | 1 |
| DOXEPIN                   | PC3  | 0.724776847 | 1 |
| NIPECOTIC ACID            | PC3  | 0.725348768 | 1 |
| TRIHXYPHENIDYL            | HL60 | 0.72572991  | 1 |
| ACETAZOLAMIDE             | MCF7 | 0.725895149 | 1 |
| SALBUTAMOL                | PC3  | 0.725895149 | 1 |
| RESCINNAMINE              | MCF7 | 0.726164576 | 1 |
| DEHYDROCHOLIC ACID        | PC3  | 0.726433948 | 1 |
| FUSARIC ACID              | PC3  | 0.727443654 | 1 |
| NEOMYCIN                  | HL60 | 0.728965049 | 1 |
| MEPYRAMINE                | MCF7 | 0.729124539 | 1 |
| ETIOCHOLANOLONE           | MCF7 | 0.729133445 | 1 |
| PINDOLOL                  | HL60 | 0.729345111 | 1 |
| DIFLUNISAL                | MCF7 | 0.730199167 | 1 |
| SULFAPHENAZOLE            | MCF7 | 0.730199167 | 1 |
| SECURININE                | MCF7 | 0.731004526 | 1 |
| FUROSEMIDE                | PC3  | 0.731053951 | 1 |
| MESALAZINE                | MCF7 | 0.731107093 | 1 |
| TRIMETHADIONE             | MCF7 | 0.731541139 | 1 |
| PRONETALOL                | PC3  | 0.731623038 | 1 |
| TETRACYCLINE              | MCF7 | 0.731809357 | 1 |
| METHYLDOPATE              | PC3  | 0.732002282 | 1 |
| ARTEMISININ               | HL60 | 0.732191859 | 1 |
| DIRITHROMYCIN             | HL60 | 0.732381407 | 1 |
| CARBENOXOLONE             | MCF7 | 0.732613657 | 1 |
| CYCLOPENTHIAZIDE          | PC3  | 0.733139301 | 1 |
| HYDROCOTARNINE            | PC3  | 0.733707408 | 1 |
| CONESSINE                 | MCF7 | 0.734220644 | 1 |
| HOMATROPINE               | MCF7 | 0.734488265 | 1 |
| HECOGENIN                 | PC3  | 0.734653652 | 1 |
| PENTOXIFYLLINE            | MCF7 | 0.735023325 | 1 |
| GLYCOCHOLIC ACID          | HL60 | 0.735221035 | 1 |
| GENISTEIN                 | HL60 | 0.735372374 | 1 |
| 6-BROMOINDIRUBIN-3'-OXIME | PC3  | 0.735487985 | 1 |
| EPIRIZOLE                 | PC3  | 0.73582546  | 1 |
| SULFAMONOMETHOXINE        | PC3  | 0.73597712  | 1 |
| FUSIDIC ACID              | MCF7 | 0.736092716 | 1 |
| GENTAMICIN                | MCF7 | 0.73635991  | 1 |
| CICLOSPORIN               | MCF7 | 0.736621948 | 1 |
| AZLOCILLIN                | MCF7 | 0.736627044 | 1 |
| NALTREXONE                | MCF7 | 0.737428074 | 1 |

|                                     |        |             |   |
|-------------------------------------|--------|-------------|---|
| BENZOCAINE                          | PC3    | 0.738430997 | 1 |
| CEFSULODIN                          | HL60   | 0.738619539 | 1 |
| MK-886                              | MCF7   | 0.738761882 | 1 |
| TETRYZOLINE                         | MCF7   | 0.739561416 | 1 |
| ACETYLSALICYLSALICYLIC ACID         | MCF7   | 0.739827801 | 1 |
| PEMPIDINE                           | MCF7   | 0.740165911 | 1 |
| MORANTEL                            | MCF7   | 0.740360382 | 1 |
| PHYSOSTIGMINE                       | PC3    | 0.741067725 | 1 |
| METHAPYRILENE                       | MCF7   | 0.741158777 | 1 |
| DILOXANIDE                          | HL60   | 0.741255825 | 1 |
| TROPICAMIDE                         | MCF7   | 0.74136113  | 1 |
| TACRINE                             | MCF7   | 0.741424781 | 1 |
| CLOBETASOL                          | MCF7   | 0.741690721 | 1 |
| PIRETANIDE                          | MCF7   | 0.741956596 | 1 |
| WITHAFERIN A                        | PC3    | 0.742222408 | 1 |
| SULFANILAMIDE                       | MCF7   | 0.742488155 | 1 |
| KETOPROFEN                          | PC3    | 0.742488155 | 1 |
| TOLNAFTATE                          | PC3    | 0.743285008 | 1 |
| VINBURNINE                          | MCF7   | 0.744081275 | 1 |
| AMILORIDE                           | MCF7   | 0.744346567 | 1 |
| VANCOMYCIN                          | HL60   | 0.744823593 | 1 |
| SYROSGOPINE                         | MCF7   | 0.745407078 | 1 |
| DEPUDECIN                           | MCF7   | 0.745936938 | 1 |
| CEFEPIME                            | PC3    | 0.746135057 | 1 |
| ALPROSTADIL                         | HL60   | 0.746509463 | 1 |
| EPIRIZOLE                           | MCF7   | 0.746995859 | 1 |
| (-)-MK-801                          | PC3    | 0.747257875 | 1 |
| TRACAZOLATE                         | MCF7   | 0.747260422 | 1 |
| LEVOBUNOLOL                         | MCF7   | 0.747260422 | 1 |
| PIRENZEPINE                         | PC3    | 0.747524918 | 1 |
| DAUNORUBICIN                        | MCF7   | 0.748181225 | 1 |
| SULFATHIAZOLE                       | PC3    | 0.748846388 | 1 |
| SAQUINAVIR                          | PC3    | 0.748939834 | 1 |
| HOMOSALATE                          | MCF7   | 0.749110479 | 1 |
| PINDOLOL                            | PC3    | 0.749638457 | 1 |
| MONENSIN                            | MCF7   | 0.749690815 | 1 |
| GALLAMINE TRIETHIODIDE              | MCF7   | 0.750166161 | 1 |
| DL-THIORPHAN                        | MCF7   | 0.751220746 | 1 |
| PROTRIPTYLINE                       | PC3    | 0.751736969 | 1 |
| SOLASODINE                          | MCF7   | 0.751951006 | 1 |
| CLINDAMYCIN                         | MCF7   | 0.752274224 | 1 |
| PIRINIXIC ACID                      | SKMEL5 | 0.752295464 | 1 |
| NITROFURANTOIN                      | MCF7   | 0.753063602 | 1 |
| BCB000040                           | MCF7   | 0.753063602 | 1 |
| TETRAMISOLE                         | MCF7   | 0.754377828 | 1 |
| NALBUPHINE                          | MCF7   | 0.754903024 | 1 |
| COLCHICINE                          | HL60   | 0.755083211 | 1 |
| CHENODEOXYCHOLIC ACID               | PC3    | 0.755825266 | 1 |
| EXEMESTANE                          | MCF7   | 0.756381431 | 1 |
| OFLOXACIN                           | MCF7   | 0.756476902 | 1 |
| PROCHLORPERAZINE                    | PC3    | 0.756562977 | 1 |
| 16-PHENYLTETRAHYDROPROSTAGLANDIN E2 | PC3    | 0.756738964 | 1 |
| THIOCOLCHICOSIDE                    | MCF7   | 0.757262872 | 1 |
| NAFTOPIDIL                          | PC3    | 0.757492791 | 1 |
| THIETHYLPERAZINE                    | PC3    | 0.757677891 | 1 |
| DELSOLINE                           | MCF7   | 0.757786491 | 1 |
| HYDROXYACHILLIN                     | MCF7   | 0.758048192 | 1 |
| IOPAMIDOL                           | PC3    | 0.758232974 | 1 |
| 0317956-0000                        | PC3    | 0.758684661 | 1 |
| ZIMELDINE                           | MCF7   | 0.759094266 | 1 |
| ALFUZOSIN                           | MCF7   | 0.759127508 | 1 |

|                           |        |             |   |
|---------------------------|--------|-------------|---|
| VINCAMINE                 | HL60   | 0.759157384 | 1 |
| MONORDEN                  | PC3    | 0.759636531 | 1 |
| CHLORZOXAZONE             | MCF7   | 0.760139168 | 1 |
| PROPRANOLOL               | PC3    | 0.760265466 | 1 |
| NITRENDIPINE              | MCF7   | 0.760300575 | 1 |
| BEZAFIBRATE               | MCF7   | 0.76118289  | 1 |
| PRESTWICK-984             | PC3    | 0.761740839 | 1 |
| LAUDANOSINE               | PC3    | 0.761925093 | 1 |
| TENOXICAM                 | MCF7   | 0.7619649   | 1 |
| ORNIDAZOLE                | PC3    | 0.762225421 | 1 |
| MEPHENTERMINE             | MCF7   | 0.762746238 | 1 |
| LOBELANIDINE              | HL60   | 0.762845802 | 1 |
| VERAPAMIL                 | PC3    | 0.763006534 | 1 |
| ZOXAZOLAMINE              | MCF7   | 0.763266754 | 1 |
| NORTRIPTYLINE             | PC3    | 0.763581693 | 1 |
| LORGLUMIDE                | MCF7   | 0.763704613 | 1 |
| AMINOCAPROIC ACID         | PC3    | 0.765418766 | 1 |
| CEFAPIRIN                 | MCF7   | 0.767160927 | 1 |
| PAPAVERINE                | MCF7   | 0.767678842 | 1 |
| BENPERIDOL                | PC3    | 0.76816718  | 1 |
| NORDIHYDROGUAIARETIC ACID | ssMCF7 | 0.768196446 | 1 |
| PHA-00767505E             | MCF7   | 0.768713738 | 1 |
| KAWAIN                    | PC3    | 0.769489088 | 1 |
| BENZYDAMINE               | PC3    | 0.769994589 | 1 |
| NALTREXONE                | PC3    | 0.770005594 | 1 |
| TROPINE                   | HL60   | 0.770359598 | 1 |
| BROMOCRIPTINE             | PC3    | 0.770521784 | 1 |
| PRESTWICK-685             | PC3    | 0.770521784 | 1 |
| FLUVOXAMINE               | MCF7   | 0.77077976  | 1 |
| W-13                      | MCF7   | 0.771295473 | 1 |
| THEOPHYLLINE              | MCF7   | 0.771810868 | 1 |
| GUANFACINE                | HL60   | 0.772364306 | 1 |
| HYDRASTINE HYDROCHLORIDE  | PC3    | 0.772546312 | 1 |
| ESTRADIOL                 | PC3    | 0.773673874 | 1 |
| MONORDEN                  | MCF7   | 0.77375477  | 1 |
| SEROTONIN                 | PC3    | 0.773819228 | 1 |
| GIBBERELLIC ACID          | PC3    | 0.774000911 | 1 |
| GOSSYPOL                  | MCF7   | 0.774152679 | 1 |
| TANESPIMYCIN              | ssMCF7 | 0.774182554 | 1 |
| CLOFILUM TOSYLATE         | PC3    | 0.774364156 | 1 |
| SULFACHLORPYRIDAZINE      | PC3    | 0.77438302  | 1 |
| TRIFLUOPERAZINE           | PC3    | 0.774572094 | 1 |
| QUINPIROLE                | MCF7   | 0.775305547 | 1 |
| SKIMMIANINE               | PC3    | 0.77563423  | 1 |
| SCRIPTAID                 | MCF7   | 0.775815505 | 1 |
| CARBARSONE                | MCF7   | 0.775922414 | 1 |
| FELODIPINE                | PC3    | 0.775996739 | 1 |
| CITIOLONE                 | PC3    | 0.776178693 | 1 |
| PYRIMETHAMINE             | MCF7   | 0.776434889 | 1 |
| MONENSIN                  | PC3    | 0.776691003 | 1 |
| CEFOXITIN                 | MCF7   | 0.777202983 | 1 |
| INDOMETACIN               | SKMEL5 | 0.777264226 | 1 |
| MAPROTILINE               | PC3    | 0.77744513  | 1 |
| PHENIRAMINE               | MCF7   | 0.777714631 | 1 |
| HELVETICOSIDE             | MCF7   | 0.778128287 | 1 |
| BACLOFEN                  | PC3    | 0.778225947 | 1 |
| PHENYLPROPANOLAMINE       | MCF7   | 0.778225947 | 1 |
| CLIOQUINOL                | MCF7   | 0.778232639 | 1 |
| OXYPHENBUTAZONE           | PC3    | 0.77925188  | 1 |
| FENDILINE                 | MCF7   | 0.779502773 | 1 |
| FLUPENTIXOL               | PC3    | 0.779793088 | 1 |

|                        |      |             |   |
|------------------------|------|-------------|---|
| XYLAZINE               | MCF7 | 0.78179575  | 1 |
| ALSTERPAULLONE         | PC3  | 0.7820501   | 1 |
| SULFAFURAZOLE          | PC3  | 0.782313693 | 1 |
| METFORMIN              | MCF7 | 0.78280216  | 1 |
| IOVERSOL               | PC3  | 0.78303233  | 1 |
| LYNESTRENOL            | PC3  | 0.783320566 | 1 |
| GLIQUIDONE             | MCF7 | 0.783574401 | 1 |
| SKIMMIANINE            | MCF7 | 0.78382815  | 1 |
| TOPIRAMATE             | MCF7 | 0.784288288 | 1 |
| SULFADIMIDINE          | PC3  | 0.784335388 | 1 |
| ALIMEMAZINE            | PC3  | 0.784646743 | 1 |
| PHENAZOPYRIDINE        | PC3  | 0.785184101 | 1 |
| PROMETHAZINE           | MCF7 | 0.785601963 | 1 |
| TOLAZOLINE             | PC3  | 0.785855016 | 1 |
| RANITIDINE             | MCF7 | 0.78661365  | 1 |
| TETRAETHYLENEPENTAMINE | HL60 | 0.786972452 | 1 |
| FLUOROMETHOLONE        | MCF7 | 0.787118967 | 1 |
| CINCHOCAINE            | PC3  | 0.787876279 | 1 |
| CLOTRIMAZOLE           | PC3  | 0.78804335  | 1 |
| CICLOHEXIMIDE          | PC3  | 0.788221678 | 1 |
| NAPROXEN               | PC3  | 0.79013803  | 1 |
| DANAZOL                | MCF7 | 0.790143415 | 1 |
| TETRAHYDROALSTONINE    | HL60 | 0.790535884 | 1 |
| SC-19220               | MCF7 | 0.790646238 | 1 |
| QUIPAZINE              | MCF7 | 0.790897514 | 1 |
| SULFABENZAMIDE         | MCF7 | 0.7911487   | 1 |
| OMEPRAZOLE             | MCF7 | 0.791901715 | 1 |
| ISOXICAM               | PC3  | 0.792653912 | 1 |
| CARTEOLOL              | PC3  | 0.793196656 | 1 |
| LOXAPINE               | PC3  | 0.794434836 | 1 |
| HYCANTHONE             | MCF7 | 0.794655747 | 1 |
| CLORSULON              | MCF7 | 0.794905562 | 1 |
| DESIPRAMINE            | MCF7 | 0.795155285 | 1 |
| KAWAIN                 | MCF7 | 0.795404915 | 1 |
| SPARTEINE              | PC3  | 0.795494336 | 1 |
| PUROMYCIN              | PC3  | 0.795670757 | 1 |
| AMOXAPINE              | PC3  | 0.796153248 | 1 |
| SUCCINYLSULFATHIAZOLE  | PC3  | 0.796375977 | 1 |
| OXETACAINE             | PC3  | 0.796402506 | 1 |
| CIMETIDINE             | MCF7 | 0.797149721 | 1 |
| WORTMANNIN             | HL60 | 0.79734358  | 1 |
| GLIMEPIRIDE            | PC3  | 0.797432407 | 1 |
| PROMAZINE              | PC3  | 0.797896092 | 1 |
| NATAMYCIN              | MCF7 | 0.798144694 | 1 |
| C-75                   | MCF7 | 0.798641616 | 1 |
| GLYCOCHOLIC ACID       | MCF7 | 0.798889935 | 1 |
| URSODEOXYCHOLIC ACID   | MCF7 | 0.799013881 | 1 |
| GENISTEIN              | MCF7 | 0.799876952 | 1 |
| CELASTROL              | MCF7 | 0.800766574 | 1 |
| CLOPERASTINE           | MCF7 | 0.800936542 | 1 |
| PRENYLAMINE            | HL60 | 0.800941581 | 1 |
| CIPROFIBRATE           | HL60 | 0.801291452 | 1 |
| DIGOXIGENIN            | MCF7 | 0.801542518 | 1 |
| DICLOXACILLIN          | MCF7 | 0.801615169 | 1 |
| 2,6-DIMETHYLPIPERIDINE | MCF7 | 0.801643457 | 1 |
| IOHEXOL                | HL60 | 0.801815897 | 1 |
| BUTAMBEN               | HL60 | 0.801990616 | 1 |
| PRIDINOL               | MCF7 | 0.802109421 | 1 |
| ALLANTOIN              | MCF7 | 0.802356403 | 1 |
| TOLBUTAMIDE            | PC3  | 0.802603288 | 1 |
| VINBURNINE             | HL60 | 0.802863487 | 1 |

|                           |      |             |   |
|---------------------------|------|-------------|---|
| CYCLOPENTHIAZIDE          | MCF7 | 0.803096767 | 1 |
| 2-AMINOBENZENESULFONAMIDE | PC3  | 0.80338663  | 1 |
| 2-AMINOBENZENESULFONAMIDE | MCF7 | 0.803589859 | 1 |
| CEFAMANDOLE               | PC3  | 0.804082562 | 1 |
| DESIPRAMINE               | HL60 | 0.804083473 | 1 |
| METHYLDOPA                | MCF7 | 0.804563704 | 1 |
| HECOGENIN                 | MCF7 | 0.804820885 | 1 |
| BENFOTIAMINE              | HL60 | 0.805127274 | 1 |
| SCOPOLAMINE N-OXIDE       | PC3  | 0.805312611 | 1 |
| PIPERACETAZINE            | PC3  | 0.805822161 | 1 |
| SURAMIN SODIUM            | MCF7 | 0.806049462 | 1 |
| CEFSULODIN                | MCF7 | 0.806294883 | 1 |
| PRESTWICK-692             | HL60 | 0.80651626  | 1 |
| CEFOTIAM                  | MCF7 | 0.806785427 | 1 |
| ZOXAZOLAMINE              | HL60 | 0.807209569 | 1 |
| ACENOCOUMAROL             | MCF7 | 0.807275575 | 1 |
| THIOCOLCHICOSIDE          | HL60 | 0.807555926 | 1 |
| SPLITOMICIN               | PC3  | 0.80772903  | 1 |
| RAMIPRIL                  | MCF7 | 0.808254679 | 1 |
| TRIFLUPROMAZINE           | MCF7 | 0.808499206 | 1 |
| BUSPIRONE                 | MCF7 | 0.809232186 | 1 |
| BROMOCRIPTINE             | MCF7 | 0.809476312 | 1 |
| CLOFAZIMINE               | MCF7 | 0.809566293 | 1 |
| DANAZOL                   | PC3  | 0.809629879 | 1 |
| HEPTAMINOL                | HL60 | 0.810147239 | 1 |
| DACARBAZINE               | MCF7 | 0.810208087 | 1 |
| BEZAFIBRATE               | PC3  | 0.810491894 | 1 |
| LOMUSTINE                 | MCF7 | 0.810695432 | 1 |
| DICYCLOVERINE             | PC3  | 0.811182373 | 1 |
| GELDANAMYCIN              | MCF7 | 0.811429331 | 1 |
| PRIMIDONE                 | PC3  | 0.812040333 | 1 |
| SPIRAMYCIN                | MCF7 | 0.812051947 | 1 |
| FELODIPINE                | MCF7 | 0.812358353 | 1 |
| PAROMOMYCIN               | HL60 | 0.812383871 | 1 |
| CEFOTIAM                  | PC3  | 0.813584646 | 1 |
| CHLOROPYRAZINE            | MCF7 | 0.813853266 | 1 |
| CLOZAPINE                 | HL60 | 0.814358538 | 1 |
| DIFLUNISAL                | PC3  | 0.815063202 | 1 |
| PROPOFOL                  | HL60 | 0.815295666 | 1 |
| HYDROQUININE              | MCF7 | 0.815304879 | 1 |
| BENDROFLUMETHIAZIDE       | MCF7 | 0.815316726 | 1 |
| HEXETIDINE                | MCF7 | 0.815546452 | 1 |
| DEXVERAPAMIL              | MCF7 | 0.816490297 | 1 |
| LIDOCAINE                 | PC3  | 0.816511705 | 1 |
| SAQUINAVIR                | MCF7 | 0.816752757 | 1 |
| 0225151-0000              | MCF7 | 0.8170015   | 1 |
| DIHYDROERGOTAMINE         | PC3  | 0.817234548 | 1 |
| TOLFENAMIC ACID           | PC3  | 0.817234548 | 1 |
| EBSELEN                   | MCF7 | 0.81734204  | 1 |
| EPIVINCAMINE              | MCF7 | 0.817475287 | 1 |
| SR-95639A                 | MCF7 | 0.81771592  | 1 |
| DIETHYLSTILBESTROL        | PC3  | 0.81771592  | 1 |
| MEFEXAMIDE                | HL60 | 0.818362402 | 1 |
| TOMATIDINE                | MCF7 | 0.81843719  | 1 |
| AZAPROPAZONE              | MCF7 | 0.818532278 | 1 |
| KARAKOLINE                | MCF7 | 0.818856814 | 1 |
| GUANABENZ                 | MCF7 | 0.818917509 | 1 |
| CARBAMAZEPINE             | PC3  | 0.819637194 | 1 |
| FELBINAC                  | MCF7 | 0.821312738 | 1 |
| AMOXAPINE                 | MCF7 | 0.821551674 | 1 |
| NORETHISTERONE            | MCF7 | 0.821790503 | 1 |

|                                  |        |             |   |
|----------------------------------|--------|-------------|---|
| PHENSUXIMIDE                     | PC3    | 0.821918655 | 1 |
| ONDANSETRON                      | MCF7   | 0.822267838 | 1 |
| SENECIPHYLLINE                   | MCF7   | 0.822744743 | 1 |
| ACETYLSALICYLSALICYLIC ACID      | PC3    | 0.822761908 | 1 |
| ISOCONAZOLE                      | MCF7   | 0.822983034 | 1 |
| TYRPHOSTIN AG-825                | MCF7   | 0.823435539 | 1 |
| ISOSORBIDE                       | PC3    | 0.823603812 | 1 |
| BACLOFEN                         | MCF7   | 0.823935115 | 1 |
| TALAMPICILLIN                    | MCF7   | 0.823935115 | 1 |
| TRAPIDIL                         | HL60   | 0.82427636  | 1 |
| PROGLUMIDE                       | PC3    | 0.824410505 | 1 |
| RITODRINE                        | PC3    | 0.824444361 | 1 |
| THIORIDAZINE                     | PC3    | 0.824516425 | 1 |
| SULINDAC                         | MCF7   | 0.824534054 | 1 |
| DIETHYLCARBAMAZINE               | PC3    | 0.825115821 | 1 |
| LEVOMEPRMAZINE                   | MCF7   | 0.826070933 | 1 |
| PROPOXYCAINE                     | MCF7   | 0.826307699 | 1 |
| ETOPOSIDE                        | HL60   | 0.826623407 | 1 |
| GRAMINE                          | MCF7   | 0.826780902 | 1 |
| ROTTLERIN                        | MCF7   | 0.827027465 | 1 |
| NAPHAZOLINE                      | MCF7   | 0.827253663 | 1 |
| DINOPROST                        | HL60   | 0.827459032 | 1 |
| ZOMEPIRAC                        | MCF7   | 0.827725983 | 1 |
| TRIOXYSALEN                      | PC3    | 0.828126536 | 1 |
| ELLIPTICINE                      | MCF7   | 0.828197861 | 1 |
| PRENYLAMINE                      | MCF7   | 0.828669294 | 1 |
| PIMOZIDE                         | MCF7   | 0.828904844 | 1 |
| METOLAZONE                       | PC3    | 0.829845928 | 1 |
| LOVASTATIN                       | PC3    | 0.829957591 | 1 |
| ATRACURIUM BESILATE              | MCF7   | 0.83008092  | 1 |
| PROTRIPTYLINE                    | MCF7   | 0.830785222 | 1 |
| HARMAN                           | HL60   | 0.831119285 | 1 |
| 6-AZATHYMINE                     | MCF7   | 0.831254195 | 1 |
| ETHAVERINE                       | PC3    | 0.83161631  | 1 |
| METITEPINE                       | MCF7   | 0.831722718 | 1 |
| MYOSMINE                         | PC3    | 0.832892044 | 1 |
| BENSERAZIDE                      | SKMEL5 | 0.832939224 | 1 |
| QUIPAZINE                        | HL60   | 0.833104333 | 1 |
| PRACTOLOL                        | MCF7   | 0.833592278 | 1 |
| MEVALOLACTONE                    | MCF7   | 0.833599319 | 1 |
| TOLFENAMIC ACID                  | MCF7   | 0.833764201 | 1 |
| HYDROFLUMETHIAZIDE               | PC3    | 0.833825461 | 1 |
| CYCLOBENZAPRINE                  | MCF7   | 0.83405853  | 1 |
| ARCAINE                          | PC3    | 0.834258502 | 1 |
| ADIPHENINE                       | PC3    | 0.834291485 | 1 |
| MECLOFENOXATE                    | MCF7   | 0.834783498 | 1 |
| DOCOSAHEXAENOIC ACID ETHYL ESTER | PC3    | 0.835081194 | 1 |
| NEOSTIGMINE BROMIDE              | MCF7   | 0.835222159 | 1 |
| TONZONIUM BROMIDE                | MCF7   | 0.835222159 | 1 |
| ISOTRETINOIN                     | HL60   | 0.835409869 | 1 |
| IMIDUREA                         | PC3    | 0.836558418 | 1 |
| CHLORTETRACYCLINE                | PC3    | 0.83661472  | 1 |
| CHLOROGENIC ACID                 | PC3    | 0.836722265 | 1 |
| DOBUTAMINE                       | MCF7   | 0.836846409 | 1 |
| DOXAZOSIN                        | MCF7   | 0.837077982 | 1 |
| (+)-CHELIDONINE                  | PC3    | 0.837540633 | 1 |
| RANITIDINE                       | PC3    | 0.837540781 | 1 |
| MEFEXAMIDE                       | MCF7   | 0.837772005 | 1 |
| CHLOROGENIC ACID                 | MCF7   | 0.83869574  | 1 |
| LOBELANIDINE                     | MCF7   | 0.839617603 | 1 |
| IRINOTECAN                       | PC3    | 0.839661574 | 1 |

|                                         |      |             |   |
|-----------------------------------------|------|-------------|---|
| HARMALINE                               | MCF7 | 0.839847776 | 1 |
| OCTOPAMINE                              | PC3  | 0.839986995 | 1 |
| TILETAMINE                              | PC3  | 0.84031218  | 1 |
| AMINOPHENAZONE                          | PC3  | 0.840537588 | 1 |
| OLEANDOMYCIN                            | HL60 | 0.840961843 | 1 |
| CLINDAMYCIN                             | PC3  | 0.841226338 | 1 |
| FLUNARIZINE                             | MCF7 | 0.841226338 | 1 |
| H-7                                     | MCF7 | 0.842143014 | 1 |
| CP-645525-01                            | PC3  | 0.842420123 | 1 |
| SPIPERONE                               | HL60 | 0.842743531 | 1 |
| AMINOPHYLLINE                           | HL60 | 0.842905146 | 1 |
| 11-DEOXY-16,16-DIMETHYLPROSTAGLANDIN E2 | MCF7 | 0.843057787 | 1 |
| (+)-ISOPRENALINE                        | HL60 | 0.843873582 | 1 |
| HARMALOL                                | PC3  | 0.844195915 | 1 |
| SULFACHLORPYRIDAZINE                    | MCF7 | 0.844198567 | 1 |
| SULFAMETHIZOLE                          | PC3  | 0.844518008 | 1 |
| ORNIDAZOLE                              | HL60 | 0.844839861 | 1 |
| PREDNISOLONE                            | PC3  | 0.845322188 | 1 |
| DROFENINE                               | PC3  | 0.845482843 | 1 |
| MEBHYDROLIN                             | PC3  | 0.845643438 | 1 |
| FAMOTIDINE                              | PC3  | 0.845790612 | 1 |
| BUDESONIDE                              | HL60 | 0.845803972 | 1 |
| LATAMOXEF                               | MCF7 | 0.846445504 | 1 |
| TETRAMISOLE                             | PC3  | 0.846605735 | 1 |
| ZOXAZOLAMINE                            | PC3  | 0.847405981 | 1 |
| ESTRONE                                 | MCF7 | 0.847828812 | 1 |
| HC TOXIN                                | MCF7 | 0.84804508  | 1 |
| FENSPIRIDE                              | MCF7 | 0.848956876 | 1 |
| NALIDIXIC ACID                          | HL60 | 0.84916115  | 1 |
| DIAZOXIDE                               | MCF7 | 0.849182121 | 1 |
| SULFADOXINE                             | MCF7 | 0.849407243 | 1 |
| EPIANDROSTERONE                         | PC3  | 0.849479475 | 1 |
| ETHAMBUTOL                              | HL60 | 0.849638545 | 1 |
| PROPANTHELINE BROMIDE                   | HL60 | 0.849797553 | 1 |
| TRANEXAMIC ACID                         | MCF7 | 0.85008187  | 1 |
| PERPHENAZINE                            | MCF7 | 0.850306499 | 1 |
| CINNARIZINE                             | MCF7 | 0.850979645 | 1 |
| IOBENGUANE                              | HL60 | 0.851067399 | 1 |
| CEFALEXIN                               | PC3  | 0.851384242 | 1 |
| CEFAZOLIN                               | MCF7 | 0.851427789 | 1 |
| PRAZQUANTEL                             | PC3  | 0.85154257  | 1 |
| BENFOTIAMINE                            | MCF7 | 0.851745882 | 1 |
| ANTAZOLINE                              | HL60 | 0.85185904  | 1 |
| IPRONIAZID                              | PC3  | 0.851875436 | 1 |
| BRETYLIUM TOSILATE                      | MCF7 | 0.852099073 | 1 |
| ETIFENIN                                | MCF7 | 0.853215386 | 1 |
| NYSTATIN                                | MCF7 | 0.853280069 | 1 |
| (-)-ISOPRENALINE                        | HL60 | 0.853437648 | 1 |
| PYRITHYLDIONE                           | PC3  | 0.853595165 | 1 |
| FLUOXETINE                              | MCF7 | 0.853883672 | 1 |
| SULFAPYRIDINE                           | MCF7 | 0.854772961 | 1 |
| FLUMEQUINE                              | PC3  | 0.854853039 | 1 |
| FLURBIPROFEN                            | MCF7 | 0.854930779 | 1 |
| ARTICAINE                               | PC3  | 0.855637161 | 1 |
| DISULFIRAM                              | MCF7 | 0.855660232 | 1 |
| ALFAXALONE                              | MCF7 | 0.855660232 | 1 |
| SOLASODINE                              | PC3  | 0.856103108 | 1 |
| CICLOSPORIN                             | PC3  | 0.856106875 | 1 |
| DEXAMETHASONE                           | MCF7 | 0.856354378 | 1 |
| LYNESTRENOL                             | MCF7 | 0.856545476 | 1 |
| ROXARSONE                               | MCF7 | 0.85676647  | 1 |



|                                  |      |             |   |
|----------------------------------|------|-------------|---|
| MEPTAZINOL                       | MCF7 | 0.857649169 | 1 |
| SB-203580                        | MCF7 | 0.858359471 | 1 |
| SEROTONIN                        | MCF7 | 0.858449285 | 1 |
| RESCINNAMINE                     | HL60 | 0.858602344 | 1 |
| TRIAMTERENE                      | MCF7 | 0.859188968 | 1 |
| OXEDRINE                         | HL60 | 0.859223651 | 1 |
| TETRANDRINE                      | MCF7 | 0.859408426 | 1 |
| MEPHENESIN                       | PC3  | 0.859846954 | 1 |
| ANTIMYCIN A                      | PC3  | 0.860284967 | 1 |
| TOMATIDINE                       | PC3  | 0.86030846  | 1 |
| PALMATINE                        | PC3  | 0.860617824 | 1 |
| METHOTREXATE                     | MCF7 | 0.860687665 | 1 |
| HEXAMETHONIUM BROMIDE            | HL60 | 0.861852688 | 1 |
| DICOUMAROL                       | PC3  | 0.862031832 | 1 |
| TELENZEPINE                      | PC3  | 0.862314688 | 1 |
| ALTRETAMINE                      | HL60 | 0.862468558 | 1 |
| HYDROCHLOROTHIAZIDE              | MCF7 | 0.862684759 | 1 |
| CEFAPIRIN                        | PC3  | 0.863083384 | 1 |
| ETIDRONIC ACID                   | PC3  | 0.863543816 | 1 |
| LISURIDE                         | MCF7 | 0.863553498 | 1 |
| CHLORZOXAZONE                    | HL60 | 0.864003657 | 1 |
| TRETINOIN                        | PC3  | 0.864400948 | 1 |
| CLORGILINE                       | MCF7 | 0.864420137 | 1 |
| PROCAINAMIDE                     | HL60 | 0.864768745 | 1 |
| PROPOXYCAINE                     | PC3  | 0.864921565 | 1 |
| PHA-00846566E                    | MCF7 | 0.865227006 | 1 |
| PNU-0230031                      | MCF7 | 0.865623227 | 1 |
| CEFIXIME                         | MCF7 | 0.866147084 | 1 |
| OXYBENZONE                       | MCF7 | 0.866147084 | 1 |
| TOMATIDINE                       | HL60 | 0.866293967 | 1 |
| ALPHA-ESTRADIOL                  | MCF7 | 0.866435264 | 1 |
| NARINGENIN                       | MCF7 | 0.866577496 | 1 |
| IFOSFAMIDE                       | PC3  | 0.866598216 | 1 |
| DOXORUBICIN                      | MCF7 | 0.867007376 | 1 |
| CYTISINE                         | PC3  | 0.867205916 | 1 |
| PERGOLIDE                        | MCF7 | 0.867436723 | 1 |
| PIVMECILLINAM                    | PC3  | 0.867509366 | 1 |
| DECAMETHONIUM BROMIDE            | PC3  | 0.867660991 | 1 |
| MESTRANOL                        | PC3  | 0.867964041 | 1 |
| CLOPAMIDE                        | HL60 | 0.868115465 | 1 |
| SULFINPYRAZONE                   | MCF7 | 0.868293814 | 1 |
| MEXILETINE                       | PC3  | 0.868507752 | 1 |
| ATOVAQUONE                       | MCF7 | 0.868720493 | 1 |
| TODRALAZINE                      | PC3  | 0.868721556 | 1 |
| VORINOSTAT                       | PC3  | 0.868935226 | 1 |
| DOCOSAHEXAENOIC ACID ETHYL ESTER | MCF7 | 0.869022604 | 1 |
| FLUOCINONIDE                     | PC3  | 0.869148761 | 1 |
| ALCLOMETASONE                    | HL60 | 0.869324447 | 1 |
| ADENOSINE PHOSPHATE              | MCF7 | 0.869362162 | 1 |
| RACECADOTRIL                     | PC3  | 0.869475267 | 1 |
| 3-ACETYLCOUMARIN                 | MCF7 | 0.869504856 | 1 |
| NORCYCLOBENZAPRINE               | MCF7 | 0.869575428 | 1 |
| BETAXOLOL                        | MCF7 | 0.869788559 | 1 |
| GENISTEIN                        | PC3  | 0.870113749 | 1 |
| SENECIPHYLLINE                   | PC3  | 0.870829615 | 1 |
| METRIZAMIDE                      | HL60 | 0.870979761 | 1 |
| DIPHENHYDRAMINE                  | PC3  | 0.871276696 | 1 |
| CAY-10397                        | MCF7 | 0.871579663 | 1 |
| PIPERINE                         | PC3  | 0.871729468 | 1 |
| BUCLADESINE                      | MCF7 | 0.871970114 | 1 |
| METITEPINE                       | PC3  | 0.872028876 | 1 |

|                           |      |             |   |
|---------------------------|------|-------------|---|
| TRIMETHOBENZAMIDE         | PC3  | 0.872124077 | 1 |
| FULVESTRANT               | PC3  | 0.872189594 | 1 |
| ROTENONE                  | MCF7 | 0.872969277 | 1 |
| ALFADOLONE                | HL60 | 0.873372835 | 1 |
| SULFAQUINOXALINE          | MCF7 | 0.873391057 | 1 |
| MAFENIDE                  | HL60 | 0.873521822 | 1 |
| CP-319743                 | MCF7 | 0.87381229  | 1 |
| AMBROXOL                  | HL60 | 0.873968372 | 1 |
| METRIFONATE               | MCF7 | 0.8740227   | 1 |
| TRIMETHYLCOLCHICINIC ACID | MCF7 | 0.8740227   | 1 |
| BENFLUOREX                | PC3  | 0.87456281  | 1 |
| VINCAMINE                 | MCF7 | 0.875287281 | 1 |
| CHLOROPYRAMINE            | MCF7 | 0.87549172  | 1 |
| PRAMOCAINE                | PC3  | 0.875600425 | 1 |
| ISOMETHEPTENE             | MCF7 | 0.875701029 | 1 |
| HESPERETIN                | MCF7 | 0.875910198 | 1 |
| NIALAMIDE                 | MCF7 | 0.876328123 | 1 |
| VINPOCETINE               | HL60 | 0.876634654 | 1 |
| MINAPRINE                 | HL60 | 0.876929523 | 1 |
| PIRACETAM                 | MCF7 | 0.876953968 | 1 |
| TRIHENXYPHENIDYL          | MCF7 | 0.877076854 | 1 |
| SULFAMETHOXAZOLE          | PC3  | 0.877162305 | 1 |
| RAMIFENAZONE              | MCF7 | 0.877786481 | 1 |
| PYRANTEL                  | PC3  | 0.877786481 | 1 |
| MEFEXAMIDE                | PC3  | 0.87825299  | 1 |
| NU-1025                   | MCF7 | 0.878616761 | 1 |
| CINCHONIDINE              | MCF7 | 0.879031062 | 1 |
| VINBLASTINE               | PC3  | 0.87927844  | 1 |
| ALPHA-ESTRADIOL           | PC3  | 0.879282091 | 1 |
| 3-AMINO BENZAMIDE         | MCF7 | 0.879716866 | 1 |
| NORDIHYDROGUAIARETIC ACID | PC3  | 0.879857977 | 1 |
| STROPHANTHIDIN            | MCF7 | 0.880064355 | 1 |
| LIDOFLAZINE               | PC3  | 0.880154659 | 1 |
| PROCYCLIDINE              | HL60 | 0.880446169 | 1 |
| TETRAETHYLENEPENTAMINE    | PC3  | 0.880737396 | 1 |
| (+/-)-CATECHIN            | PC3  | 0.881464228 | 1 |
| METRONIDAZOLE             | MCF7 | 0.881505043 | 1 |
| ECONAZOLE                 | PC3  | 0.881754465 | 1 |
| CHLORPROTHIXENE           | MCF7 | 0.882529856 | 1 |
| CARTEOLOL                 | HL60 | 0.882623473 | 1 |
| ASTEMIZOLE                | HL60 | 0.882768058 | 1 |
| MESTRANOL                 | MCF7 | 0.883143037 | 1 |
| BETAMETHASONE             | PC3  | 0.883489917 | 1 |
| BETAMETHASONE             | HL60 | 0.884209989 | 1 |
| DEQUALINIUM CHLORIDE      | MCF7 | 0.88456879  | 1 |
| CORALYNE                  | PC3  | 0.884641172 | 1 |
| PRASTERONE                | MCF7 | 0.884771896 | 1 |
| ANABASINE                 | MCF7 | 0.884974858 | 1 |
| CICLACILLIN               | PC3  | 0.885785266 | 1 |
| GUANETHIDINE              | HL60 | 0.885930842 | 1 |
| CLOMIPRAMINE              | PC3  | 0.886073778 | 1 |
| BUPIVACAINE               | MCF7 | 0.886189605 | 1 |
| SELEGILINE                | PC3  | 0.8866448   | 1 |
| TTNPB                     | MCF7 | 0.887072307 | 1 |
| PROGESTERONE              | MCF7 | 0.88739915  | 1 |
| THIOPERAMIDE              | PC3  | 0.887783367 | 1 |
| NIMESULIDE                | HL60 | 0.887925362 | 1 |
| (+)-CHELIDONINE           | MCF7 | 0.888001963 | 1 |
| FLUOXETINE                | HL60 | 0.888350907 | 1 |
| PROBUCOL                  | HL60 | 0.88849261  | 1 |
| DILOXANIDE                | MCF7 | 0.888803674 | 1 |

|                       |      |             |   |
|-----------------------|------|-------------|---|
| ESCULETIN             | MCF7 | 0.889003737 | 1 |
| PENTOXIFYLLINE        | PC3  | 0.889603048 | 1 |
| FENBUFEN              | MCF7 | 0.889734051 | 1 |
| IFENPRODIL            | MCF7 | 0.889802526 | 1 |
| BROMPHENIRAMINE       | PC3  | 0.890187341 | 1 |
| EDROPHONIUM CHLORIDE  | MCF7 | 0.89020104  | 1 |
| CELECOXIB             | MCF7 | 0.890277196 | 1 |
| ETACRYNIC ACID        | MCF7 | 0.890328093 | 1 |
| VIOMYCIN              | PC3  | 0.89046877  | 1 |
| OXYMETAZOLINE         | HL60 | 0.890749905 | 1 |
| ENALAPRIL             | MCF7 | 0.89079771  | 1 |
| GLIMEPIRIDE           | HL60 | 0.890890362 | 1 |
| NOVOBIOCIN            | PC3  | 0.890996306 | 1 |
| PENTETRAZOL           | MCF7 | 0.890996306 | 1 |
| LASALOCID             | PC3  | 0.891171056 | 1 |
| PARBENDAZOLE          | PC3  | 0.891194754 | 1 |
| EPIVINCAMINE          | PC3  | 0.892151157 | 1 |
| AMPROLIUM             | PC3  | 0.892382341 | 1 |
| PHENAZONE             | MCF7 | 0.893127631 | 1 |
| RIBAVIRIN             | PC3  | 0.893405955 | 1 |
| ADRENOSTERONE         | MCF7 | 0.893564593 | 1 |
| CP-320650-01          | PC3  | 0.893634547 | 1 |
| MIFEPRISTONE          | PC3  | 0.894100463 | 1 |
| NICERGOLINE           | MCF7 | 0.894153709 | 1 |
| LEVOBUNOLOL           | PC3  | 0.894516273 | 1 |
| THEOPHYLLINE          | PC3  | 0.894793106 | 1 |
| CAFFEIC ACID          | PC3  | 0.89493141  | 1 |
| TROLEANDOMYCIN        | HL60 | 0.895069639 | 1 |
| CHLORMEZANONE         | PC3  | 0.895207794 | 1 |
| CARTEOLOL             | MCF7 | 0.895523085 | 1 |
| SYROSLINGOPINE        | PC3  | 0.895621807 | 1 |
| AMIODARONE            | MCF7 | 0.895772258 | 1 |
| SULFASALAZINE         | MCF7 | 0.896169834 | 1 |
| KETOCONAZOLE          | PC3  | 0.896310328 | 1 |
| VERAPAMIL             | MCF7 | 0.896408078 | 1 |
| ACEMETACIN            | MCF7 | 0.896496711 | 1 |
| MEGESTROL             | MCF7 | 0.897272899 | 1 |
| PHENIRAMINE           | HL60 | 0.897408046 | 1 |
| ESTRADIOL             | MCF7 | 0.897444015 | 1 |
| NOMIFENSINE           | MCF7 | 0.89804667  | 1 |
| TIAPROFENIC ACID      | PC3  | 0.898091664 | 1 |
| HOMOCHLORCYCLIZINE    | MCF7 | 0.898239734 | 1 |
| PYRANTEL              | MCF7 | 0.898625406 | 1 |
| NITROFURAL            | MCF7 | 0.898818015 | 1 |
| BUTACAINE             | MCF7 | 0.898818015 | 1 |
| CEFUROXIME            | PC3  | 0.898909504 | 1 |
| METENEPROST           | MCF7 | 0.899010471 | 1 |
| TIAPROFENIC ACID      | MCF7 | 0.899970468 | 1 |
| AZAPROPAZONE          | PC3  | 0.900131127 | 1 |
| BERBERINE             | MCF7 | 0.900162009 | 1 |
| TUBOCURARINE CHLORIDE | PC3  | 0.900536961 | 1 |
| MEPYRAMINE            | HL60 | 0.900807134 | 1 |
| NEFOPAM               | HL60 | 0.900942106 | 1 |
| MECLOZINE             | MCF7 | 0.901203072 | 1 |
| PARBENDAZOLE          | MCF7 | 0.901308044 | 1 |
| LORACARBEF            | HL60 | 0.901481226 | 1 |
| CEFIXIME              | HL60 | 0.901615814 | 1 |
| NEFOPAM               | PC3  | 0.901750325 | 1 |
| ISOETARINE            | MCF7 | 0.902068998 | 1 |
| LEVODOPA              | PC3  | 0.902258852 | 1 |
| OXEDRINE              | PC3  | 0.9022876   | 1 |

|                                         |      |             |   |
|-----------------------------------------|------|-------------|---|
| ECONAZOLE                               | MCF7 | 0.902448551 | 1 |
| YOHIMBINE                               | PC3  | 0.902555776 | 1 |
| SALBUTAMOL                              | HL60 | 0.902689748 | 1 |
| 0316684-0000                            | PC3  | 0.902827488 | 1 |
| URSOLIC ACID                            | MCF7 | 0.903016724 | 1 |
| FURSULTIAMINE                           | PC3  | 0.90335845  | 1 |
| GINKGOLIDE A                            | MCF7 | 0.903583506 | 1 |
| ALLANTOIN                               | PC3  | 0.903960585 | 1 |
| ETHAVERINE                              | MCF7 | 0.903960585 | 1 |
| ORNIDAZOLE                              | MCF7 | 0.904337045 | 1 |
| TERAZOSIN                               | PC3  | 0.904424347 | 1 |
| FASUDIL                                 | PC3  | 0.904557234 | 1 |
| GUANADREL                               | HL60 | 0.904822777 | 1 |
| FLUTAMIDE                               | PC3  | 0.905088098 | 1 |
| VIOMYCIN                                | MCF7 | 0.905275472 | 1 |
| HEXYLCAINE                              | PC3  | 0.905617535 | 1 |
| CORBADRINE                              | HL60 | 0.906013861 | 1 |
| SPAGLUMIC ACID                          | MCF7 | 0.906409483 | 1 |
| PODOPHYLLOTOXIN                         | MCF7 | 0.906582717 | 1 |
| PIROXICAM                               | HL60 | 0.90667284  | 1 |
| FURAZOLIDONE                            | HL60 | 0.906935883 | 1 |
| CEFEPIME                                | MCF7 | 0.906954807 | 1 |
| PHA-00767505E                           | PC3  | 0.907882282 | 1 |
| MG-262                                  | MCF7 | 0.908377002 | 1 |
| COPPER SULFATE                          | MCF7 | 0.908621428 | 1 |
| CLONIDINE                               | PC3  | 0.90876838  | 1 |
| ISOXSUPRINE                             | MCF7 | 0.909174129 | 1 |
| TERAZOSIN                               | HL60 | 0.909419096 | 1 |
| AZTREONAM                               | PC3  | 0.909725406 | 1 |
| RILUZOLE                                | PC3  | 0.91009213  | 1 |
| VERAPAMIL                               | HL60 | 0.910585391 | 1 |
| PIRENPERONE                             | HL60 | 0.910714582 | 1 |
| ASIATICOSIDE                            | PC3  | 0.910843694 | 1 |
| TRIPROLIDINE                            | MCF7 | 0.911188488 | 1 |
| DYDROGESTERONE                          | MCF7 | 0.911370657 | 1 |
| AMPHOTERICIN B                          | MCF7 | 0.911370657 | 1 |
| MEFENAMIC ACID                          | HL60 | 0.911616688 | 1 |
| GUANFACINE                              | MCF7 | 0.911696723 | 1 |
| CORTISONE                               | MCF7 | 0.911916205 | 1 |
| ALFADOLONE                              | MCF7 | 0.912898619 | 1 |
| CORTICOSTERONE                          | PC3  | 0.913154043 | 1 |
| ESTROPIPATE                             | PC3  | 0.913663928 | 1 |
| KANAMYCIN                               | MCF7 | 0.913724284 | 1 |
| 10-METHOXYHARMALAN                      | PC3  | 0.914299471 | 1 |
| KETOTIFEN                               | PC3  | 0.914553124 | 1 |
| RAUBASINE                               | MCF7 | 0.915337789 | 1 |
| RIFAMPICIN                              | PC3  | 0.91569056  | 1 |
| CINOXACIN                               | MCF7 | 0.915694566 | 1 |
| METIXENE                                | PC3  | 0.915942433 | 1 |
| CHICAGO SKY BLUE 6B                     | PC3  | 0.916068247 | 1 |
| IPRATROPIUM BROMIDE                     | MCF7 | 0.91619398  | 1 |
| GLICLAZIDE                              | MCF7 | 0.91693817  | 1 |
| LYSERGOL                                | HL60 | 0.916946672 | 1 |
| SURAMIN SODIUM                          | PC3  | 0.917292019 | 1 |
| AMINOPHYLLINE                           | MCF7 | 0.917645216 | 1 |
| 11-DEOXY-16,16-DIMETHYLPROSTAGLANDIN E2 | PC3  | 0.91799776  | 1 |
| CYPROHEPTADINE                          | MCF7 | 0.918349648 | 1 |
| 2-DEOXY-D-GLUCOSE                       | MCF7 | 0.918443245 | 1 |
| TRICHOSTATIN A                          | MCF7 | 0.918651342 | 1 |
| CLEMIZOLE                               | MCF7 | 0.918700882 | 1 |
| ESTRONE                                 | PC3  | 0.918939484 | 1 |

|                          |      |             |   |
|--------------------------|------|-------------|---|
| CARBINOXAMINE            | PC3  | 0.919063339 | 1 |
| METHACHOLINE CHLORIDE    | PC3  | 0.919310801 | 1 |
| PHENETICILLIN            | MCF7 | 0.919401378 | 1 |
| KAEMPFEROL               | MCF7 | 0.919576091 | 1 |
| CYCLOPENTOLATE           | PC3  | 0.919928019 | 1 |
| PHENETICILLIN            | PC3  | 0.920051215 | 1 |
| SULMAZOLE                | MCF7 | 0.920174329 | 1 |
| DIPYRIDAMOLE             | MCF7 | 0.920409973 | 1 |
| LEVAMISOLE               | MCF7 | 0.920447186 | 1 |
| METHAZOLAMIDE            | MCF7 | 0.920967862 | 1 |
| ETICLOPRIDE              | MCF7 | 0.920967862 | 1 |
| LOPERAMIDE               | PC3  | 0.92114109  | 1 |
| THIOLCHICOSIDE           | PC3  | 0.92127864  | 1 |
| MEBEVERINE               | MCF7 | 0.921314152 | 1 |
| TESTOSTERONE             | MCF7 | 0.92147152  | 1 |
| IONOMYCIN                | MCF7 | 0.921683084 | 1 |
| VELNACRINE               | MCF7 | 0.921832345 | 1 |
| OUABAIN                  | MCF7 | 0.922004744 | 1 |
| CICLOHEXIMIDE            | MCF7 | 0.922176977 | 1 |
| H-89                     | MCF7 | 0.922254619 | 1 |
| LEVONORGESTREL           | MCF7 | 0.922316282 | 1 |
| HYDRASTINE HYDROCHLORIDE | HL60 | 0.922376243 | 1 |
| OXANTEL                  | MCF7 | 0.922692678 | 1 |
| COLCHICINE               | PC3  | 0.923949772 | 1 |
| AMILORIDE                | PC3  | 0.92423078  | 1 |
| IMATINIB                 | MCF7 | 0.924310891 | 1 |
| DEXPROPRANOLOL           | PC3  | 0.924911079 | 1 |
| ETILEFRINE               | PC3  | 0.925150567 | 1 |
| METAMIZOLE SODIUM        | MCF7 | 0.925241437 | 1 |
| INDOPROFEN               | MCF7 | 0.925586597 | 1 |
| CEFALOTIN                | MCF7 | 0.925586597 | 1 |
| ETHIONAMIDE              | MCF7 | 0.925747818 | 1 |
| ELDELINE                 | MCF7 | 0.925861845 | 1 |
| (-)-ATENOLOL             | PC3  | 0.925986129 | 1 |
| BETONICINE               | MCF7 | 0.926068142 | 1 |
| NOCODAZOLE               | HL60 | 0.926224103 | 1 |
| DECAMETHONIUM BROMIDE    | MCF7 | 0.92626047  | 1 |
| PRAZOSIN                 | PC3  | 0.926580431 | 1 |
| TRIMIPRAMINE             | MCF7 | 0.926596395 | 1 |
| KETOPROFEN               | HL60 | 0.926699039 | 1 |
| NORETYNODREL             | MCF7 | 0.926764104 | 1 |
| NIFLUMIC ACID            | MCF7 | 0.926931644 | 1 |
| SULFAMERAZINE            | PC3  | 0.927172623 | 1 |
| RIMEXOLONE               | MCF7 | 0.927266217 | 1 |
| RAUBASINE                | PC3  | 0.927408908 | 1 |
| DEXAMETHASONE            | PC3  | 0.92743325  | 1 |
| CAY-10397                | PC3  | 0.927600113 | 1 |
| PIRLINDOLE               | MCF7 | 0.927766806 | 1 |
| DACARBAZINE              | PC3  | 0.927880461 | 1 |
| TOLAZOLINE               | MCF7 | 0.92793333  | 1 |
| TROLEANDOMYCIN           | PC3  | 0.92793333  | 1 |
| SULFACETAMIDE            | MCF7 | 0.927998138 | 1 |
| TETRACYCLINE             | HL60 | 0.928115729 | 1 |
| GANCICLOVIR              | PC3  | 0.928233236 | 1 |
| SULINDAC                 | PC3  | 0.928265869 | 1 |
| PIRENZEPINE              | MCF7 | 0.928597728 | 1 |
| TILETAMINE               | MCF7 | 0.928763403 | 1 |
| ETAMIVAN                 | MCF7 | 0.928928907 | 1 |
| DIOXYBENZONE             | PC3  | 0.929170227 | 1 |
| BROMPHENIRAMINE          | MCF7 | 0.929424397 | 1 |
| RITODRINE                | HL60 | 0.929636679 | 1 |

|                             |        |             |   |
|-----------------------------|--------|-------------|---|
| DEBRISOQUINE                | MCF7   | 0.929753871 | 1 |
| LEVOCABASTINE               | MCF7   | 0.9302468   | 1 |
| DIFLUNISAL                  | HL60   | 0.930333795 | 1 |
| OXETACAINE                  | MCF7   | 0.930574564 | 1 |
| GEFITINIB                   | HL60   | 0.930796828 | 1 |
| TRIDIHEXETHYL               | MCF7   | 0.930901643 | 1 |
| (-)-ISOPRENALINE            | PC3    | 0.93102783  | 1 |
| XYLOMETAZOLINE              | MCF7   | 0.931064925 | 1 |
| ORCIPRENALINE               | MCF7   | 0.931228036 | 1 |
| ISOTRETINOIN                | PC3    | 0.931258489 | 1 |
| ACETYLSALICYLSALICYLIC ACID | HL60   | 0.931488804 | 1 |
| LIDOCAINE                   | MCF7   | 0.931716336 | 1 |
| NADOLOL                     | HL60   | 0.931718776 | 1 |
| RITODRINE                   | MCF7   | 0.932203088 | 1 |
| LAUDANOSINE                 | MCF7   | 0.93268829  | 1 |
| CITALOPRAM                  | PC3    | 0.932849678 | 1 |
| ETAMIVAN                    | PC3    | 0.933091373 | 1 |
| CETIRIZINE                  | PC3    | 0.933205195 | 1 |
| N-ACETYLMURAMIC ACID        | HL60   | 0.933318931 | 1 |
| AMPHOTERICIN B              | HL60   | 0.933999527 | 1 |
| MIMOSINE                    | MCF7   | 0.93413456  | 1 |
| NIRIDAZOLE                  | MCF7   | 0.934613531 | 1 |
| CHLORPROPAMIDE              | MCF7   | 0.934758589 | 1 |
| CYTISINE                    | HL60   | 0.935014567 | 1 |
| METHOTREXATE                | HL60   | 0.936198786 | 1 |
| PIZOTIFEN                   | HL60   | 0.936245596 | 1 |
| PINACIDIL                   | MCF7   | 0.936670958 | 1 |
| BUTYL HYDROXYBENZOATE       | MCF7   | 0.936699524 | 1 |
| ETOMIDATE                   | MCF7   | 0.936984864 | 1 |
| RIBOSTAMYCIN                | PC3    | 0.937244938 | 1 |
| BICUCULLINE                 | PC3    | 0.93746605  | 1 |
| CALCIUM PANTOTHENATE        | MCF7   | 0.937766561 | 1 |
| CEFACLOX                    | MCF7   | 0.937922373 | 1 |
| FENOFIBRATE                 | MCF7   | 0.93823347  | 1 |
| STROPHANTHIDIN              | PC3    | 0.938346984 | 1 |
| AMPICILLIN                  | PC3    | 0.938456705 | 1 |
| CINOXACIN                   | PC3    | 0.938566338 | 1 |
| TETRAETHYLENEPENTAMINE      | ssMCF7 | 0.939003988 | 1 |
| AMINOPHENAZONE              | MCF7   | 0.939008131 | 1 |
| SPIRAMYCIN                  | PC3    | 0.93931676  | 1 |
| HEXESTROL                   | PC3    | 0.939549065 | 1 |
| NIZATIDINE                  | HL60   | 0.93987505  | 1 |
| NORDIHYDROGUAIARETIC ACID   | MCF7   | 0.940028034 | 1 |
| PRESTWICK-1083              | MCF7   | 0.940308458 | 1 |
| SEMUSTINE                   | PC3    | 0.940544199 | 1 |
| IVERMECTIN                  | MCF7   | 0.940696832 | 1 |
| PYRIDOXINE                  | PC3    | 0.940955909 | 1 |
| NIPECOTIC ACID              | MCF7   | 0.941153663 | 1 |
| IOHEXOL                     | PC3    | 0.941278436 | 1 |
| METICRANE                   | MCF7   | 0.941457328 | 1 |
| METHYLDOPA                  | PC3    | 0.9418142   | 1 |
| NIFLUMIC ACID               | PC3    | 0.941921086 | 1 |
| TETRAHYDROALSTONINE         | MCF7   | 0.94206252  | 1 |
| CHLORTALIDONE               | PC3    | 0.942347737 | 1 |
| PREDNISONE                  | PC3    | 0.942514541 | 1 |
| IMIPENEM                    | MCF7   | 0.942814995 | 1 |
| MYOSMINE                    | MCF7   | 0.943088769 | 1 |
| BENPERIDOL                  | MCF7   | 0.943114734 | 1 |
| HESPERIDIN                  | MCF7   | 0.943413756 | 1 |
| MEBENDAZOLE                 | MCF7   | 0.943712062 | 1 |
| CAPTOPRIL                   | PC3    | 0.944158173 | 1 |

|                         |        |             |   |
|-------------------------|--------|-------------|---|
| YOHIMBINE               | MCF7   | 0.944184241 | 1 |
| TROLEANDOMYCIN          | MCF7   | 0.944249958 | 1 |
| MOXISYLYTE              | MCF7   | 0.944306518 | 1 |
| CP-319743               | PC3    | 0.944454683 | 1 |
| CORYNANTHINE            | PC3    | 0.944459521 | 1 |
| FLUCLOXACILLIN          | PC3    | 0.94487757  | 1 |
| CAMPTOTHECIN            | MCF7   | 0.944898097 | 1 |
| TERFENADINE             | HL60   | 0.94519016  | 1 |
| RILUZOLE                | MCF7   | 0.945339891 | 1 |
| FLUDROCORTISONE         | MCF7   | 0.945375421 | 1 |
| PIPENZOLATE BROMIDE     | MCF7   | 0.945486794 | 1 |
| HESPERETIN              | HL60   | 0.945501939 | 1 |
| OXYBENZONE              | HL60   | 0.945812906 | 1 |
| PROPOFOL                | MCF7   | 0.945926421 | 1 |
| ARECOLINE               | PC3    | 0.946638172 | 1 |
| PROCAINE                | MCF7   | 0.946655515 | 1 |
| COPPER SULFATE          | ssMCF7 | 0.946740923 | 1 |
| AMIKACIN                | MCF7   | 0.947380078 | 1 |
| SR-95531                | HL60   | 0.947457639 | 1 |
| CHLORPROPAMIDE          | HL60   | 0.947559664 | 1 |
| STREPTOMYCIN            | PC3    | 0.947865193 | 1 |
| BETA-ESCIN              | MCF7   | 0.947883002 | 1 |
| CYCLOSERINE             | MCF7   | 0.948100097 | 1 |
| BENZOCAINE              | MCF7   | 0.948243555 | 1 |
| IMIPENEM                | PC3    | 0.948574907 | 1 |
| AMOXICILLIN             | MCF7   | 0.948815562 | 1 |
| AG-012559               | MCF7   | 0.948877702 | 1 |
| PHENELZINE              | PC3    | 0.948958107 | 1 |
| THIETHYLPERAZINE        | HL60   | 0.948978452 | 1 |
| PICROTOXININ            | MCF7   | 0.949384647 | 1 |
| DEMECARIUM BROMIDE      | HL60   | 0.949581028 | 1 |
| EUCATROPINE             | PC3    | 0.949668093 | 1 |
| SAQUINAVIR              | HL60   | 0.950080658 | 1 |
| COTININE                | MCF7   | 0.950149972 | 1 |
| DIPROPHYLLINE           | MCF7   | 0.950232785 | 1 |
| CP-863187               | PC3    | 0.950934521 | 1 |
| METHYLERGOMETRINE       | HL60   | 0.951073038 | 1 |
| FOLIOSIDINE             | MCF7   | 0.9511806   | 1 |
| HYDROCOTARNINE          | MCF7   | 0.951909223 | 1 |
| SULFADIMETHOXINE        | PC3    | 0.952047729 | 1 |
| NAPELLINE               | PC3    | 0.952544349 | 1 |
| MOMETASONE              | PC3    | 0.952641698 | 1 |
| CYTISINE                | MCF7   | 0.952874883 | 1 |
| LOPERAMIDE              | HL60   | 0.953127054 | 1 |
| IOHEXOL                 | MCF7   | 0.953285961 | 1 |
| MEPRYLCAINE             | MCF7   | 0.953559087 | 1 |
| BIOTIN                  | MCF7   | 0.953898806 | 1 |
| DILOXANIDE              | PC3    | 0.954090816 | 1 |
| METHAPYRILENE           | HL60   | 0.954186682 | 1 |
| CHLORCYCLIZINE          | MCF7   | 0.954212694 | 1 |
| DEMECARIUM BROMIDE      | MCF7   | 0.954509176 | 1 |
| MERBROMIN               | MCF7   | 0.954644159 | 1 |
| FENBENDAZOLE            | MCF7   | 0.954855135 | 1 |
| FLUDROXYCORTIDE         | MCF7   | 0.954913567 | 1 |
| CONESSINE               | PC3    | 0.95523506  | 1 |
| KAEMPFEROL              | PC3    | 0.955707866 | 1 |
| PHENTOLAMINE            | MCF7   | 0.955875116 | 1 |
| 3-HYDROXY-DL-KYNURENINE | PC3    | 0.956084429 | 1 |
| DIHYDROSTREPTOMYCIN     | PC3    | 0.956116662 | 1 |
| YOHIMBIC ACID           | PC3    | 0.956178336 | 1 |
| ACETYLSALICYLIC ACID    | PC3    | 0.956249404 | 1 |

|                     |      |             |   |
|---------------------|------|-------------|---|
| PROCAINAMIDE        | MCF7 | 0.956249404 | 1 |
| PENTETIC ACID       | HL60 | 0.956272149 | 1 |
| LOMEFLOXACIN        | HL60 | 0.956365869 | 1 |
| FOSFOSAL            | MCF7 | 0.95638196  | 1 |
| STACHYDRINE         | PC3  | 0.956459495 | 1 |
| PRAMOCAINE          | MCF7 | 0.956508536 | 1 |
| ETHISTERONE         | PC3  | 0.956514328 | 1 |
| GABAPENTIN          | MCF7 | 0.956646508 | 1 |
| MOLSIDOMINE         | PC3  | 0.957019283 | 1 |
| HELIOTRINE          | MCF7 | 0.957047058 | 1 |
| AZACYCLONOL         | MCF7 | 0.957173354 | 1 |
| MINAPRINE           | MCF7 | 0.957304596 | 1 |
| CLOZAPINE           | PC3  | 0.957315145 | 1 |
| VANCOMYCIN          | PC3  | 0.957483192 | 1 |
| CEFOTETAN           | MCF7 | 0.957668098 | 1 |
| CARBAMAZEPINE       | MCF7 | 0.957672029 | 1 |
| SC-19220            | PC3  | 0.957697195 | 1 |
| ANDROSTERONE        | MCF7 | 0.957827685 | 1 |
| DEXPANTHENOL        | MCF7 | 0.9580881   | 1 |
| TOLMETIN            | MCF7 | 0.958864821 | 1 |
| RANITIDINE          | HL60 | 0.959042885 | 1 |
| PHA-00665752        | MCF7 | 0.959133783 | 1 |
| 6-BENZYLAMINOPURINE | PC3  | 0.959586852 | 1 |
| SC-58125            | MCF7 | 0.959634742 | 1 |
| RESVERATROL         | MCF7 | 0.959692844 | 1 |
| ACEPROMAZINE        | MCF7 | 0.9597624   | 1 |
| METANEPHRINE        | PC3  | 0.960144236 | 1 |
| CHLOROPYRAMINE      | PC3  | 0.960396412 | 1 |
| ZALCITABINE         | MCF7 | 0.960524365 | 1 |
| DIENESTROL          | MCF7 | 0.960650695 | 1 |
| NALOXONE            | HL60 | 0.96075375  | 1 |
| VORINOSTAT          | MCF7 | 0.960860205 | 1 |
| PIRENPERONE         | PC3  | 0.960931849 | 1 |
| TRIFLUPROMAZINE     | HL60 | 0.961020755 | 1 |
| PREDNISOLONE        | MCF7 | 0.96108843  | 1 |
| SALBUTAMOL          | MCF7 | 0.961154113 | 1 |
| ETYNODIOL           | PC3  | 0.961286905 | 1 |
| DEMECOLCINE         | MCF7 | 0.961640439 | 1 |
| PHENAZONE           | PC3  | 0.961904588 | 1 |
| NOMEGESTROL         | MCF7 | 0.962275663 | 1 |
| PHA-00816795        | PC3  | 0.962522797 | 1 |
| HYDROCHLOROTHIAZIDE | PC3  | 0.962769166 | 1 |
| DIMENHYDRINATE      | PC3  | 0.963039306 | 1 |
| PEMPIDINE           | PC3  | 0.963557569 | 1 |
| BUFEXAMAC           | MCF7 | 0.963625427 | 1 |
| FENBUFEN            | PC3  | 0.963746983 | 1 |
| 8-AZAGUANINE        | MCF7 | 0.963868347 | 1 |
| CEFADROXIL          | PC3  | 0.963901159 | 1 |
| ACONITINE           | MCF7 | 0.963989519 | 1 |
| FINASTERIDE         | PC3  | 0.964110499 | 1 |
| BISOPROLOL          | MCF7 | 0.964231286 | 1 |
| CEFACLOR            | PC3  | 0.964413664 | 1 |
| OCTOPAMINE          | MCF7 | 0.964472285 | 1 |
| COTININE            | HL60 | 0.964498745 | 1 |
| ETOFENAMATE         | MCF7 | 0.96519066  | 1 |
| PROMAZINE           | MCF7 | 0.965282634 | 1 |
| PYRITHYLDIONE       | MCF7 | 0.965428576 | 1 |
| ENILCONAZOLE        | PC3  | 0.965679766 | 1 |
| CLEBOPRIDE          | MCF7 | 0.965784002 | 1 |
| SULFABENZAMIDE      | HL60 | 0.966096975 | 1 |
| PIPERACILLIN        | MCF7 | 0.966151974 | 1 |



|                              |      |             |   |
|------------------------------|------|-------------|---|
| MEGESTROL                    | PC3  | 0.966263182 | 1 |
| THIOGUANOSINE                | MCF7 | 0.966372514 | 1 |
| FOLIC ACID                   | PC3  | 0.966511767 | 1 |
| 15-DELTA PROSTAGLANDIN J2    | MCF7 | 0.966574231 | 1 |
| THEOBROMINE                  | PC3  | 0.966594435 | 1 |
| HYOSCYAMINE                  | PC3  | 0.966606564 | 1 |
| CARCININE                    | HL60 | 0.966677006 | 1 |
| MEPENZOLATE BROMIDE          | MCF7 | 0.966956185 | 1 |
| NALOXONE                     | MCF7 | 0.966963422 | 1 |
| SCOULERINE                   | PC3  | 0.96725229  | 1 |
| PSEUDOPelletierine           | HL60 | 0.967497385 | 1 |
| TIMOLOL                      | PC3  | 0.967741605 | 1 |
| RACECADOTRIL                 | MCF7 | 0.967765175 | 1 |
| N-ACETYL-L-ASPARTIC ACID     | HL60 | 0.967822817 | 1 |
| FLUOXETINE                   | PC3  | 0.968065871 | 1 |
| ERGOCALCIFEROL               | PC3  | 0.968146694 | 1 |
| N6-METHYLADENOSINE           | MCF7 | 0.968223178 | 1 |
| BUMETANIDE                   | PC3  | 0.96822742  | 1 |
| BRETYLIUM TOSILATE           | PC3  | 0.968388579 | 1 |
| RIBOFLAVIN                   | PC3  | 0.968469013 | 1 |
| ORPHENADRINE                 | MCF7 | 0.968697179 | 1 |
| VITEXIN                      | HL60 | 0.968869719 | 1 |
| PRESTWICK-857                | MCF7 | 0.969129829 | 1 |
| ISOCORYDINE                  | HL60 | 0.969267985 | 1 |
| CLOFAZIMINE                  | PC3  | 0.969347345 | 1 |
| RILUZOLE                     | HL60 | 0.969426608 | 1 |
| ROTENONE                     | PC3  | 0.969466602 | 1 |
| STACHYDRINE                  | HL60 | 0.96958484  | 1 |
| REMOXIPRIDE                  | MCF7 | 0.96969014  | 1 |
| VALDECOXIB                   | MCF7 | 0.96974268  | 1 |
| MYRICETIN                    | PC3  | 0.969821454 | 1 |
| HARMAN                       | MCF7 | 0.969912895 | 1 |
| TRIFLUOPERAZINE              | MCF7 | 0.970123075 | 1 |
| PHENOXYBENZAMINE             | MCF7 | 0.97034135  | 1 |
| OXAMIC ACID                  | MCF7 | 0.970448116 | 1 |
| METAMPICILLIN                | PC3  | 0.970686363 | 1 |
| PNU-0230031                  | PC3  | 0.970822452 | 1 |
| RIBOSTAMYCIN                 | MCF7 | 0.971014906 | 1 |
| NIFENAZONE                   | HL60 | 0.971222615 | 1 |
| PRESTWICK-860                | MCF7 | 0.971450211 | 1 |
| PACLITAXEL                   | HL60 | 0.971606179 | 1 |
| BIPERIDEN                    | MCF7 | 0.971811292 | 1 |
| BUTEIN                       | PC3  | 0.972139033 | 1 |
| GLY-HIS-LYS                  | PC3  | 0.972204414 | 1 |
| PRACTOLOL                    | HL60 | 0.972214761 | 1 |
| BUTIRO SIN                   | PC3  | 0.972516686 | 1 |
| RESVERATROL                  | PC3  | 0.972524686 | 1 |
| ETICLOPRIDE                  | HL60 | 0.97281703  | 1 |
| CYPROTERONE                  | MCF7 | 0.97284318  | 1 |
| NETILMICIN                   | PC3  | 0.97289187  | 1 |
| TRIBENOSIDE                  | MCF7 | 0.97294895  | 1 |
| ACACETIN                     | MCF7 | 0.972987373 | 1 |
| ELDELINE                     | PC3  | 0.973265071 | 1 |
| BENZATHINE BENZYL PENICILLIN | MCF7 | 0.973474829 | 1 |
| THALIDOMIDE                  | MCF7 | 0.973548133 | 1 |
| PRIMAQUINE                   | MCF7 | 0.973579411 | 1 |
| CALMIDAZOLIUM                | MCF7 | 0.973683795 | 1 |
| OXOLAMINE                    | PC3  | 0.973855775 | 1 |
| GW-8510                      | PC3  | 0.973995756 | 1 |
| SUXIBUZONE                   | MCF7 | 0.974202738 | 1 |
| CEFTAZIDIME                  | MCF7 | 0.974222048 | 1 |

|                           |        |             |   |
|---------------------------|--------|-------------|---|
| FLUPENTIXOL               | MCF7   | 0.974305932 | 1 |
| ATROPINE METHONITRATE     | HL60   | 0.97458584  | 1 |
| DOXYCYCLINE               | MCF7   | 0.9746437   | 1 |
| AMPYRONE                  | MCF7   | 0.974716718 | 1 |
| COBALT CHLORIDE           | MCF7   | 0.974810733 | 1 |
| QUINPIROLE                | HL60   | 0.974875085 | 1 |
| 15-DELTA PROSTAGLANDIN J2 | SKMEL5 | 0.974947147 | 1 |
| PRALIDOXIME               | MCF7   | 0.975225725 | 1 |
| PIRETANIDE                | PC3    | 0.975305967 | 1 |
| METERGOLINE               | MCF7   | 0.975326929 | 1 |
| CYCLIZINE                 | PC3    | 0.975377432 | 1 |
| MIANSERIN                 | PC3    | 0.975427933 | 1 |
| TAMOXIFEN                 | MCF7   | 0.975436865 | 1 |
| GLAFENINE                 | PC3    | 0.975448797 | 1 |
| ETIOCHOLANOLONE           | PC3    | 0.975629345 | 1 |
| LOPERAMIDE                | MCF7   | 0.97576087  | 1 |
| MIDODRINE                 | HL60   | 0.975804129 | 1 |
| CANRENOIC ACID            | PC3    | 0.975829958 | 1 |
| MEMANTINE                 | MCF7   | 0.975829958 | 1 |
| PENBUTOLOL                | HL60   | 0.975945564 | 1 |
| THIAMINE                  | MCF7   | 0.976129381 | 1 |
| TREMORINE                 | PC3    | 0.976227235 | 1 |
| BENZETHONIUM CHLORIDE     | MCF7   | 0.97622879  | 1 |
| 4-HYDROXYPHENAZONE        | HL60   | 0.976297403 | 1 |
| NAPROXEN                  | HL60   | 0.976327998 | 1 |
| 4,5-DIANILINOPHTHALIMIDE  | MCF7   | 0.976437439 | 1 |
| AMINOHIPPURIC ACID        | MCF7   | 0.976525815 | 1 |
| QUERCETIN                 | MCF7   | 0.976565685 | 1 |
| ADIPIODONE                | HL60   | 0.976577076 | 1 |
| ASTEMIZOLE                | MCF7   | 0.97682104  | 1 |
| BERGENIN                  | HL60   | 0.976855148 | 1 |
| DOSULEPIN                 | MCF7   | 0.977114462 | 1 |
| HOMOSALATE                | PC3    | 0.977114462 | 1 |
| NIFUROXAZIDE              | MCF7   | 0.977211869 | 1 |
| NILUTAMIDE                | PC3    | 0.977269253 | 1 |
| NOVOBIOCIN                | ssMCF7 | 0.977406486 | 1 |
| PRESTWICK-983             | HL60   | 0.977474952 | 1 |
| COLCHICINE                | MCF7   | 0.977529447 | 1 |
| FLUDROCORTISONE           | HL60   | 0.977543318 | 1 |
| PROCARBAZINE              | MCF7   | 0.977599491 | 1 |
| CEPHAELINE                | HL60   | 0.977611584 | 1 |
| DIOXYBENZONE              | MCF7   | 0.977983902 | 1 |
| MOXONIDINE                | MCF7   | 0.978221456 | 1 |
| AZATHIOPRINE              | MCF7   | 0.978479426 | 1 |
| TESTOSTERONE              | PC3    | 0.978556756 | 1 |
| METYRAPONE                | MCF7   | 0.978648881 | 1 |
| CHLORAMPHENICOL           | MCF7   | 0.978756728 | 1 |
| CHLOROQUINE               | HL60   | 0.979021948 | 1 |
| CISAPRIDE                 | MCF7   | 0.979117825 | 1 |
| CANADINE                  | MCF7   | 0.979396772 | 1 |
| BIPERIDEN                 | PC3    | 0.979416753 | 1 |
| BENDROFLUMETHIAZIDE       | PC3    | 0.979489351 | 1 |
| NIFUROXAZIDE              | PC3    | 0.979742982 | 1 |
| ZAPRINAST                 | HL60   | 0.979807925 | 1 |
| AMODIAQUINE               | MCF7   | 0.979857645 | 1 |
| CP-944629                 | PC3    | 0.979949214 | 1 |
| MEDRYSONE                 | MCF7   | 0.980246571 | 1 |
| ISOPROPAMIDE IODIDE       | MCF7   | 0.980313465 | 1 |
| MOLSIDOMINE               | HL60   | 0.980323828 | 1 |
| MIDECAMYCIN               | PC3    | 0.980584528 | 1 |
| DIPERODON                 | MCF7   | 0.980642979 | 1 |

|                                 |      |             |   |
|---------------------------------|------|-------------|---|
| IRINOTECAN                      | MCF7 | 0.980674477 | 1 |
| METAMPICILLIN                   | HL60 | 0.980706505 | 1 |
| THIORIDAZINE                    | MCF7 | 0.980992223 | 1 |
| MONASTROL                       | PC3  | 0.981336191 | 1 |
| BUTEIN                          | MCF7 | 0.981398602 | 1 |
| CROTAMITON                      | PC3  | 0.981460911 | 1 |
| NADOLOL                         | MCF7 | 0.981474891 | 1 |
| VINPOCETINE                     | PC3  | 0.981523118 | 1 |
| FLUOCINONIDE                    | MCF7 | 0.981631023 | 1 |
| 2,6-DIMETHYLPYPERIDINE          | PC3  | 0.981738041 | 1 |
| ISOXICAM                        | HL60 | 0.981832631 | 1 |
| DISOPYRAMIDE                    | PC3  | 0.981894229 | 1 |
| REPAGLINIDE                     | MCF7 | 0.98199936  | 1 |
| APOMORPHINE                     | MCF7 | 0.982086059 | 1 |
| PHENTOLAMINE                    | PC3  | 0.982086059 | 1 |
| CEFAZOLIN                       | HL60 | 0.982261677 | 1 |
| HYDROQUININE                    | HL60 | 0.982383346 | 1 |
| DIHYDROSTREPTOMYCIN             | MCF7 | 0.982430821 | 1 |
| SEMUSTINE                       | MCF7 | 0.982516502 | 1 |
| HYMECROMONE                     | PC3  | 0.98262546  | 1 |
| PROPYLTHIOURACIL                | PC3  | 0.982865944 | 1 |
| AMANTADINE                      | PC3  | 0.982925809 | 1 |
| MIDODRINE                       | PC3  | 0.983110558 | 1 |
| SOLANINE                        | MCF7 | 0.983194606 | 1 |
| DYDROGESTERONE                  | PC3  | 0.983282861 | 1 |
| LEVAMISOLE                      | PC3  | 0.983401061 | 1 |
| NABUMETONE                      | MCF7 | 0.983445526 | 1 |
| AG-028671                       | MCF7 | 0.983694773 | 1 |
| PRESTWICK-1103                  | PC3  | 0.983869772 | 1 |
| DROFENINE                       | MCF7 | 0.983941845 | 1 |
| PIRACETAM                       | HL60 | 0.984101672 | 1 |
| PHA-00846566E                   | PC3  | 0.98426863  | 1 |
| ETOPOSIDE                       | PC3  | 0.984331934 | 1 |
| LETROZOLE                       | MCF7 | 0.984511566 | 1 |
| TOMELUKAST                      | MCF7 | 0.984674251 | 1 |
| ALBENDAZOLE                     | MCF7 | 0.985150367 | 1 |
| MAPROTILINE                     | HL60 | 0.98545862  | 1 |
| 15(S)-15-METHYLPROSTAGLANDIN E2 | MCF7 | 0.985620837 | 1 |
| CYPROTERONE                     | PC3  | 0.985897784 | 1 |
| WITHAFERIN A                    | MCF7 | 0.985930368 | 1 |
| CYCLIC ADENOSINE MONOPHOSPHATE  | HL60 | 0.986060772 | 1 |
| DAUNORUBICIN                    | PC3  | 0.986383964 | 1 |
| LUMICOLCHICINE                  | MCF7 | 0.986437469 | 1 |
| PRESTWICK-682                   | MCF7 | 0.986464112 | 1 |
| ACEPROMAZINE                    | PC3  | 0.98649087  | 1 |
| PACLITAXEL                      | MCF7 | 0.986616234 | 1 |
| LEVODOPA                        | HL60 | 0.986809111 | 1 |
| FLUPHENAZINE                    | MCF7 | 0.986817319 | 1 |
| PRAZOSIN                        | MCF7 | 0.98706515  | 1 |
| N-ACETYL-L-LEUCINE              | PC3  | 0.987123634 | 1 |
| SCOULERINE                      | HL60 | 0.987227648 | 1 |
| METOPROLOL                      | PC3  | 0.987485873 | 1 |
| NISOXETINE                      | MCF7 | 0.987861827 | 1 |
| MG-132                          | MCF7 | 0.988245016 | 1 |
| FLUTICASON                      | MCF7 | 0.98828768  | 1 |
| DIMETHADIONE                    | MCF7 | 0.98835793  | 1 |
| CISAPRIDE                       | PC3  | 0.988443514 | 1 |
| BEPRIDIL                        | MCF7 | 0.988567432 | 1 |
| DIAZOXIDE                       | PC3  | 0.988775065 | 1 |
| BCB000039                       | MCF7 | 0.988980817 | 1 |
| OXYBENZONE                      | PC3  | 0.989029039 | 1 |

|                           |      |             |   |
|---------------------------|------|-------------|---|
| CAPSAICIN                 | PC3  | 0.989125172 | 1 |
| PIROMIDIC ACID            | PC3  | 0.989173082 | 1 |
| CLOXACILLIN               | MCF7 | 0.989252266 | 1 |
| 2-AMINOBENZENESULFONAMIDE | HL60 | 0.989363682 | 1 |
| BETULIN                   | HL60 | 0.989552617 | 1 |
| OXAMNIQUINE               | MCF7 | 0.98958688  | 1 |
| FLUCLOXACILLIN            | MCF7 | 0.989719267 | 1 |
| ROXITHROMYCIN             | PC3  | 0.989739885 | 1 |
| VANOXERINE                | PC3  | 0.989786442 | 1 |
| TRIMETAZIDINE             | MCF7 | 0.989850821 | 1 |
| TRANLYCYPROMINE           | HL60 | 0.990200759 | 1 |
| GUAIFENESIN               | MCF7 | 0.99020592  | 1 |
| BLEBBISTATIN              | MCF7 | 0.990240475 | 1 |
| LASALOCID                 | MCF7 | 0.990432483 | 1 |
| PROPOXYCAINE              | HL60 | 0.990472274 | 1 |
| BACITRACIN                | MCF7 | 0.990496069 | 1 |
| FURALTADONE               | MCF7 | 0.990519072 | 1 |
| CARISOPRODOL              | HL60 | 0.990740029 | 1 |
| PARTHENOLIDE              | MCF7 | 0.990748319 | 1 |
| CHLORPROMAZINE            | MCF7 | 0.990934033 | 1 |
| DEFEROXAMINE              | MCF7 | 0.990935241 | 1 |
| PIRENPERONE               | MCF7 | 0.991130324 | 1 |
| COPPER SULFATE            | PC3  | 0.991134605 | 1 |
| CHLORHEXIDINE             | MCF7 | 0.991242781 | 1 |
| CHLORPHENAMINE            | HL60 | 0.991264246 | 1 |
| ACEMETACIN                | PC3  | 0.991435636 | 1 |
| NYSTATIN                  | PC3  | 0.991520702 | 1 |
| MIFEPRISTONE              | HL60 | 0.991647516 | 1 |
| TETRACAINE                | MCF7 | 0.99166444  | 1 |
| BUTAMBEN                  | PC3  | 0.991815133 | 1 |
| PRESTWICK-675             | MCF7 | 0.991898312 | 1 |
| IPRONIAZID                | HL60 | 0.992186134 | 1 |
| ACETOHEXAMIDE             | MCF7 | 0.992191473 | 1 |
| ASTEMIZOLE                | PC3  | 0.992248982 | 1 |
| DIHYDROSTREPTOMYCIN       | HL60 | 0.992267424 | 1 |
| MINOCYCLINE               | PC3  | 0.992348294 | 1 |
| NILUTAMIDE                | HL60 | 0.992388572 | 1 |
| MEPHENYTOIN               | HL60 | 0.992428744 | 1 |
| CYCLOBENZAPRINE           | PC3  | 0.992468811 | 1 |
| CALCIUM FOLINATE          | HL60 | 0.992508773 | 1 |
| ERYTHROMYCIN              | HL60 | 0.992588382 | 1 |
| QUERCETIN                 | PC3  | 0.992628029 | 1 |
| BENZYL PENICILLIN         | PC3  | 0.992746339 | 1 |
| HYCANTHONE                | HL60 | 0.992902612 | 1 |
| ETODOLAC                  | MCF7 | 0.992977475 | 1 |
| CICLOPIROX                | PC3  | 0.993095586 | 1 |
| DYCLONINE                 | PC3  | 0.99324807  | 1 |
| ACICLOVIR                 | HL60 | 0.993285928 | 1 |
| ETHISTERONE               | MCF7 | 0.993308731 | 1 |
| DIETHYLCARBAMAZINE        | MCF7 | 0.993355008 | 1 |
| PYRIDOXINE                | HL60 | 0.993398868 | 1 |
| PENBUTOLOL                | MCF7 | 0.993408098 | 1 |
| PRAZQUANTEL               | HL60 | 0.993436305 | 1 |
| U0125                     | PC3  | 0.993584995 | 1 |
| GLIPIZIDE                 | HL60 | 0.993658708 | 1 |
| CEFOPERAZONE              | MCF7 | 0.993768486 | 1 |
| TOCAINIDE                 | MCF7 | 0.993773825 | 1 |
| NOCODAZOLE                | PC3  | 0.99387642  | 1 |
| FELBINAC                  | PC3  | 0.993877314 | 1 |
| ISONIAZID                 | MCF7 | 0.99397817  | 1 |
| BUPIVACAINE               | PC3  | 0.994056583 | 1 |

|                     |        |             |   |
|---------------------|--------|-------------|---|
| BCB000038           | PC3    | 0.994129211 | 1 |
| RESERPINE           | MCF7   | 0.994198098 | 1 |
| TELENZEPINE         | MCF7   | 0.99427835  | 1 |
| CIPROFLOXACIN       | HL60   | 0.994303125 | 1 |
| DEHYDROCHOLIC ACID  | MCF7   | 0.99432764  | 1 |
| LISURIDE            | HL60   | 0.994476055 | 1 |
| VINBURNINE          | PC3    | 0.994510324 | 1 |
| BROMPERIDOL         | MCF7   | 0.994522688 | 1 |
| PHENFORMIN          | PC3    | 0.994570921 | 1 |
| AMANTADINE          | HL60   | 0.994646343 | 1 |
| MICONAZOLE          | MCF7   | 0.994666752 | 1 |
| MONENSIN            | HL60   | 0.994713717 | 1 |
| LEFLUNOMIDE         | HL60   | 0.994747246 | 1 |
| DL-ALPHA TOCOPHEROL | HL60   | 0.994813985 | 1 |
| AMYLOCAINE          | PC3    | 0.994855875 | 1 |
| STREPTOZOCIN        | PC3    | 0.994880302 | 1 |
| FAMPROFAZONE        | PC3    | 0.994902626 | 1 |
| CARBACHOL           | MCF7   | 0.994949166 | 1 |
| HEXYLCAINE          | HL60   | 0.995173483 | 1 |
| CHLORMEZANONE       | MCF7   | 0.995178686 | 1 |
| DIFENIDOL           | MCF7   | 0.995223954 | 1 |
| BRINZOLAMIDE        | PC3    | 0.995269303 | 1 |
| RICININE            | MCF7   | 0.995358487 | 1 |
| ONDANSETRON         | HL60   | 0.995458081 | 1 |
| MEVALOLACTONE       | PC3    | 0.995489173 | 1 |
| ATRACTYLOSIDE       | PC3    | 0.995491111 | 1 |
| MONORDEN            | SKMEL5 | 0.995551039 | 1 |
| PICOTAMIDE          | PC3    | 0.995578467 | 1 |
| TETRANDRINE         | HL60   | 0.995581812 | 1 |
| EPIANDROSTERONE     | MCF7   | 0.995621826 | 1 |
| SENECIPHYLLINE      | HL60   | 0.995643041 | 1 |
| BETA-ESCIN          | PC3    | 0.995664973 | 1 |
| SULFASALAZINE       | HL60   | 0.995703846 | 1 |
| PROCHLORPERAZINE    | MCF7   | 0.995818709 | 1 |
| HYDROXYACHILLIN     | HL60   | 0.995913319 | 1 |
| MITOXANTRONE        | MCF7   | 0.995961057 | 1 |
| HALOPERIDOL         | PC3    | 0.9961016   | 1 |
| GOSSYPOL            | PC3    | 0.996125575 | 1 |
| CIMETIDINE          | HL60   | 0.996146344 | 1 |
| ATROPINE OXIDE      | HL60   | 0.996174994 | 1 |
| LEVOMEPRMAZINE      | PC3    | 0.996206558 | 1 |
| DICYCLOVERINE       | HL60   | 0.996231975 | 1 |
| DIHYDROERGOCRISTINE | PC3    | 0.996260306 | 1 |
| NISOXETINE          | PC3    | 0.996344662 | 1 |
| DANTROLENE          | MCF7   | 0.996424801 | 1 |
| HOMOCHLORCYCLIZINE  | HL60   | 0.996455647 | 1 |
| TTNPB               | PC3    | 0.996510501 | 1 |
| SULCONAZOLE         | MCF7   | 0.996560456 | 1 |
| LITHOCHOLIC ACID    | HL60   | 0.99656493  | 1 |
| FLUSPIRILENE        | PC3    | 0.996778388 | 1 |
| DYCLONINE           | MCF7   | 0.996786811 | 1 |
| EQUILIN             | MCF7   | 0.996797809 | 1 |
| ADENOSINE PHOSPHATE | HL60   | 0.997085797 | 1 |
| ESCULIN             | PC3    | 0.997110722 | 1 |
| AMITRIPTYLINE       | MCF7   | 0.997150367 | 1 |
| PODOPHYLLOTOXIN     | PC3    | 0.997184857 | 1 |
| DIPIVEFRINE         | HL60   | 0.997209355 | 1 |
| MECAMYLAMINE        | PC3    | 0.997233747 | 1 |
| PIPERACILLIN        | PC3    | 0.997250935 | 1 |
| TENOXICAM           | HL60   | 0.997377859 | 1 |
| PENTOLONIUM         | PC3    | 0.997386492 | 1 |

|                       |      |             |   |
|-----------------------|------|-------------|---|
| TRAZODONE             | MCF7 | 0.997419848 | 1 |
| THIOSTREPTON          | MCF7 | 0.99748592  | 1 |
| PROMETHAZINE          | PC3  | 0.997495019 | 1 |
| HYDRALAZINE           | HL60 | 0.99751813  | 1 |
| DIPERODON             | HL60 | 0.997541136 | 1 |
| DROPERIDOL            | PC3  | 0.997632089 | 1 |
| (+/-)-CATECHIN        | HL60 | 0.997699183 | 1 |
| PIZOTIFEN             | PC3  | 0.997873402 | 1 |
| PRESTWICK-972         | HL60 | 0.997915888 | 1 |
| METENEPROST           | PC3  | 0.997924507 | 1 |
| DIMETHYLOXALYLGLYCINE | PC3  | 0.997936971 | 1 |
| SC-58125              | HL60 | 0.997957947 | 1 |
| INDOPROFEN            | HL60 | 0.998020235 | 1 |
| PRESTWICK-983         | MCF7 | 0.998070996 | 1 |
| TRIPROLIDINE          | PC3  | 0.99808156  | 1 |
| KANAMYCIN             | HL60 | 0.998201324 | 1 |
| SECURININE            | PC3  | 0.99824039  | 1 |
| METAMIZOLE SODIUM     | PC3  | 0.9982671   | 1 |
| CHLORAMBUCIL          | PC3  | 0.998294259 | 1 |
| NICARDIPINE           | HL60 | 0.998336184 | 1 |
| DEXIBUPROFEN          | HL60 | 0.998355022 | 1 |
| MEPHENTERMINE         | HL60 | 0.998373752 | 1 |
| CLEMASTINE            | MCF7 | 0.998426845 | 1 |
| HYMECROMONE           | HL60 | 0.998429303 | 1 |
| NARINGENIN            | HL60 | 0.998465801 | 1 |
| ATROPINE              | HL60 | 0.99848389  | 1 |
| BUPROPION             | PC3  | 0.998501872 | 1 |
| DISOPYRAMIDE          | MCF7 | 0.998503828 | 1 |
| NYSTATIN              | HL60 | 0.998537514 | 1 |
| SULPIRIDE             | HL60 | 0.998572728 | 1 |
| AMITRIPTYLINE         | PC3  | 0.998578884 | 1 |
| MEBHYDROLIN           | HL60 | 0.998590175 | 1 |
| SULFADIMETHOXINE      | HL60 | 0.998607514 | 1 |
| MEBENDAZOLE           | HL60 | 0.998725892 | 1 |
| IOPROMIDE             | PC3  | 0.998758751 | 1 |
| DOMPERIDONE           | MCF7 | 0.998769609 | 1 |
| DOBUTAMINE            | HL60 | 0.998791181 | 1 |
| DOMPERIDONE           | PC3  | 0.998870381 | 1 |
| PRESTWICK-685         | HL60 | 0.998885899 | 1 |
| OXYTETRACYCLINE       | HL60 | 0.998901311 | 1 |
| PIPENZOLATE BROMIDE   | PC3  | 0.998916615 | 1 |
| PF-01378883-00        | MCF7 | 0.998925246 | 1 |
| PIPERLONGUMINE        | MCF7 | 0.998946902 | 1 |
| PROGUANIL             | HL60 | 0.99897676  | 1 |
| PIPERINE              | HL60 | 0.99900619  | 1 |
| BAMBUTEROL            | HL60 | 0.999020744 | 1 |
| CORTICOSTERONE        | HL60 | 0.999063763 | 1 |
| DEFEROXAMINE          | PC3  | 0.999068613 | 1 |
| DILAZEP               | HL60 | 0.999077888 | 1 |
| TETRACAINE            | HL60 | 0.99911962  | 1 |
| KETANSERIN            | HL60 | 0.999160387 | 1 |
| TRETINOIN             | HL60 | 0.99918671  | 1 |
| HEXETIDINE            | HL60 | 0.999200189 | 1 |
| THIAMINE              | HL60 | 0.999239025 | 1 |
| CEFADROXIL            | HL60 | 0.99926438  | 1 |
| CEFOPERAZONE          | PC3  | 0.999276897 | 1 |
| BENZOCAINE            | HL60 | 0.999301608 | 1 |
| TOLMETIN              | HL60 | 0.999313802 | 1 |
| TRANEXAMIC ACID       | HL60 | 0.999325889 | 1 |
| ZUCLOPENTHIXOL        | MCF7 | 0.999345982 | 1 |
| PRESTWICK-984         | HL60 | 0.999361507 | 1 |

|                         |      |             |   |
|-------------------------|------|-------------|---|
| PENTOXYVERINE           | MCF7 | 0.999362639 | 1 |
| PARTHENOLIDE            | PC3  | 0.999373166 | 1 |
| PODOPHYLLOTOXIN         | HL60 | 0.999418725 | 1 |
| PRESTWICK-682           | HL60 | 0.99944086  | 1 |
| MONOBENZONE             | MCF7 | 0.999442703 | 1 |
| AMPICILLIN              | HL60 | 0.999451767 | 1 |
| METHANTHELINIUM BROMIDE | HL60 | 0.999473259 | 1 |
| CLENBUTEROL             | HL60 | 0.999483843 | 1 |
| ARECOLINE               | MCF7 | 0.999488165 | 1 |
| HALOFANTRINE            | HL60 | 0.999504691 | 1 |
| FLUCLOXACILLIN          | HL60 | 0.999514953 | 1 |
| CANADINE                | HL60 | 0.999525109 | 1 |
| MEGESTROL               | HL60 | 0.999554931 | 1 |
| LOMUSTINE               | PC3  | 0.999559641 | 1 |
| DIPHEMANIL METILSULFATE | HL60 | 0.999564657 | 1 |
| FUSIDIC ACID            | HL60 | 0.999583786 | 1 |
| GLAFENINE               | MCF7 | 0.999586728 | 1 |
| DIPROPHYLLINE           | HL60 | 0.99959319  | 1 |
| PIMETHIXENE             | MCF7 | 0.999612955 | 1 |
| ISOMETHEPTENE           | HL60 | 0.999620757 | 1 |
| TRIMIPRAMINE            | HL60 | 0.999629731 | 1 |
| PRIMAQUINE              | HL60 | 0.999638598 | 1 |
| TRIMETHOBENZAMIDE       | HL60 | 0.999656009 | 1 |
| ANDROSTERONE            | PC3  | 0.999664554 | 1 |
| ADIPIODONE              | PC3  | 0.999697658 | 1 |
| ATRACTYLOSID            | HL60 | 0.999705666 | 1 |
| THIAMPHENICOL           | HL60 | 0.999729044 | 1 |
| CLORGILINE              | HL60 | 0.999736621 | 1 |
| ASIATICOSIDE            | HL60 | 0.999751455 | 1 |
| KARAKOLINE              | HL60 | 0.999765858 | 1 |
| CARBARSONE              | HL60 | 0.999772899 | 1 |
| PRIMIDONE               | HL60 | 0.999786658 | 1 |
| SR-95639A               | HL60 | 0.999812887 | 1 |
| MONOCROTALINE           | HL60 | 0.999819175 | 1 |
| VIGABATRIN              | HL60 | 0.999825356 | 1 |
| RILMENIDINE             | PC3  | 0.999843255 | 1 |
| AH-6809                 | PC3  | 0.999844734 | 1 |
| DIPHENHYDRAMINE         | HL60 | 0.999849006 | 1 |
| GUANABENZ               | PC3  | 0.999852798 | 1 |
| ALPHA-ERGOCRYPTINE      | HL60 | 0.999860186 | 1 |
| ALFUZOSIN               | HL60 | 0.999870936 | 1 |
| HYCANTHONE              | PC3  | 0.99987615  | 1 |
| ISOFLUPREDONE           | HL60 | 0.999881256 | 1 |
| PROPIDIUM IODIDE        | HL60 | 0.999886255 | 1 |
| LEVOPROPOXYPHENE        | HL60 | 0.999891146 | 1 |
| GUANABENZ               | HL60 | 0.99989593  | 1 |
| NITROFURAL              | HL60 | 0.999900607 | 1 |
| CEFMETAZOLE             | HL60 | 0.999905176 | 1 |
| IODIXANOL               | HL60 | 0.999913991 | 1 |
| RILMENIDINE             | HL60 | 0.999918238 | 1 |
| CICLOPIROX              | MCF7 | 0.99992731  | 1 |
| AMITRIPTYLINE           | HL60 | 0.999930332 | 1 |
| LUMICOLCHICINE          | HL60 | 0.999934149 | 1 |
| NOCODAZOLE              | MCF7 | 0.999935472 | 1 |
| RAMIFENAZONE            | HL60 | 0.999937858 | 1 |
| CYCLOBENZAPRINE         | HL60 | 0.999941459 | 1 |
| PROCARBAZINE            | HL60 | 0.999944954 | 1 |
| ALEXIDINE               | HL60 | 0.99994834  | 1 |
| ISOCORYDINE             | PC3  | 0.999951619 | 1 |
| NADIDE                  | HL60 | 0.999954791 | 1 |
| NOSCAPINE               | HL60 | 0.999960811 | 1 |

|                         |      |             |   |
|-------------------------|------|-------------|---|
| ADIPHENINE              | HL60 | 0.999966402 | 1 |
| BIPERIDEN               | HL60 | 0.999969036 | 1 |
| CHLOROGENIC ACID        | HL60 | 0.999971563 | 1 |
| BOLDINE                 | HL60 | 0.999973982 | 1 |
| HOMATROPINE             | HL60 | 0.999976293 | 1 |
| MERBROMIN               | HL60 | 0.999980594 | 1 |
| FUROSEMIDE              | HL60 | 0.999982583 | 1 |
| IOCETAMIC ACID          | HL60 | 0.999984464 | 1 |
| PHENETICILLIN           | HL60 | 0.999986238 | 1 |
| VIOMYCIN                | HL60 | 0.999987905 | 1 |
| CHICAGO SKY BLUE 6B     | HL60 | 0.999989464 | 1 |
| 3-HYDROXY-DL-KYNURENINE | HL60 | 0.999990915 | 1 |
| TRIBENOSIDE             | HL60 | 0.999992259 | 1 |
| THIAMAZOLE              | HL60 | 0.999993495 | 1 |
| OZAGREL                 | HL60 | 0.999994624 | 1 |
| DOSULEPIN               | HL60 | 0.999995646 | 1 |
| CYCLOPENTHIAZIDE        | HL60 | 0.99999656  | 1 |
| METFORMIN               | HL60 | 0.999997366 | 1 |
| LACTOBIONIC ACID        | HL60 | 0.999998065 | 1 |
| CEFOTIAM                | HL60 | 0.999998656 | 1 |
| CARBENOXOLONE           | HL60 | 0.99999914  | 1 |
| DAPSONE                 | HL60 | 0.999999516 | 1 |
| STREPTOZOCIN            | HL60 | 0.999999785 | 1 |
| ENOXACIN                | HL60 | 1           | 1 |
