# Supplementary material for: The Diagnostic and Prognostic Values of HOXA Gene Family in Kidney Clear Cell Renal Cell Carcinoma
Source: Hindawi journal article supplement (doi:10.1155/2022/1762637), 2022-03-16
Supplement: f1 [file 1762637.f1.zip]

| Gene symbol | logFC        | AveExpr     | t            | P.Value     | adj.P.Val   | B           |
|-------------|--------------|-------------|--------------|-------------|-------------|-------------|
| AQP2        | -9.446940693 | 3.36527669  | -43.97941052 | 4.8948E-192 | 3.4254E-188 | 428.9365983 |
| LINC02437   | -3.448514347 | 2.240454136 | -42.16840981 | 1.3408E-183 | 4.6914E-180 | 409.5279165 |
| PRR35       | -3.187961167 | 2.216687137 | -41.7085582  | 1.9873E-181 | 4.6357E-178 | 404.5400159 |
| UMOD        | -10.7491672  | 3.755398766 | -40.95278746 | 7.7825E-178 | 1.3615E-174 | 396.3276386 |
| DUSP9       | -5.524154151 | 2.919771048 | -40.91351557 | 1.1986E-177 | 1.6775E-174 | 395.85308   |
| AP005432.2  | -3.839841576 | 2.513996669 | -40.00760037 | 2.6789E-173 | 3.1245E-170 | 385.8740727 |
| SLC9A4      | -4.205586247 | 2.438442765 | -39.76720756 | 3.8861E-172 | 3.8849E-169 | 383.2060681 |
| ACPP        | -3.791645153 | 2.742045754 | -39.36745435 | 3.3724E-170 | 2.95E-167   | 378.751117  |
| SLC12A1     | -7.561834939 | 3.267201746 | -39.16302036 | 3.3309E-169 | 2.5899E-166 | 376.4813882 |
| KCNJ10      | -4.779946195 | 2.889066048 | -38.7406048  | 3.8438E-167 | 2.6899E-164 | 371.7243447 |
| KNG1        | -7.992584518 | 3.303109857 | -38.70552049 | 5.7078E-167 | 3.6312E-164 | 371.3522443 |
| TMEM207     | -3.555243638 | 2.255922998 | -38.47743944 | 7.4871E-166 | 4.3662E-163 | 368.7734999 |
| FXVD4       | -7.74743337  | 3.276204902 | -37.86528797 | 7.7281E-163 | 4.1601E-160 | 361.8595416 |
| MFSD4A      | -4.404039853 | 4.461081518 | -37.30482969 | 4.6188E-160 | 2.3087E-157 | 355.4565943 |
| MUC15       | -4.967415121 | 2.570877073 | -36.64992792 | 8.5001E-157 | 3.9656E-154 | 347.9682853 |
| HS6ST2      | -3.843684937 | 2.447358043 | -36.19861105 | 1.5564E-154 | 6.8074E-152 | 342.7748384 |
| PVT1        | 2.385694176  | 4.131655483 | 35.99702065  | 1.6074E-153 | 6.617E-151  | 340.449932  |
| ESRRB       | -3.656379641 | 2.521948322 | -35.94064026 | 3.091E-153  | 1.2017E-150 | 339.7927319 |
| CA9         | 6.898889294  | 8.480081944 | 35.32662243  | 3.9158E-150 | 1.4422E-147 | 332.6743019 |
| HRG         | -3.91854546  | 2.3846855   | -34.68249005 | 7.3715E-147 | 2.5793E-144 | 325.1412638 |
| ATP12A      | -2.69991143  | 2.151979172 | -34.36344955 | 3.1399E-145 | 1.0463E-142 | 321.3939073 |
| ELF5        | -3.350093705 | 2.263251291 | -34.30163777 | 6.5035E-145 | 2.0687E-142 | 320.6707574 |
| AC073172.1  | -2.771735604 | 2.177341739 | -34.11188154 | 6.0964E-144 | 1.8549E-141 | 318.4350118 |
| TMEM238L    | -2.855185184 | 2.223114462 | -33.86315234 | 1.1524E-142 | 3.3602E-140 | 315.5028427 |
| GPC5        | -2.626136049 | 2.25211251  | -33.78606755 | 2.8694E-142 | 8.0321E-140 | 314.5915772 |
| KCNJ1       | -6.478535281 | 3.298157269 | -33.44521487 | 1.6328E-140 | 4.3948E-138 | 310.5618812 |
| SFRP1       | -5.769075649 | 4.030566481 | -32.62844783 | 2.753E-136  | 7.1353E-134 | 300.8476676 |
| SPAG4       | 3.586078428  | 6.53086515  | 32.51116121  | 1.1199E-135 | 2.7988E-133 | 299.446093  |
| IRX2        | -3.319055482 | 2.643977136 | -31.99398835 | 5.5339E-133 | 1.3354E-130 | 293.2587769 |
| SERPINA5    | -5.751105062 | 3.94426048  | -31.77448552 | 7.7575E-132 | 1.8096E-129 | 290.6232416 |
| AL031726.1  | -2.26107276  | 2.200304015 | -31.53282365 | 1.427E-130  | 3.2213E-128 | 287.7169453 |
| CLDN16      | -4.702385217 | 2.941808888 | -31.46637241 | 3.1812E-130 | 6.9569E-128 | 286.9172211 |
| NELL1       | -3.551365958 | 2.380655655 | -31.42763581 | 5.0773E-130 | 1.0767E-127 | 286.4510864 |
| LINC02121   | -3.363862695 | 2.227683712 | -31.32874692 | 1.6758E-129 | 3.4492E-127 | 285.2593909 |
| EGF         | -5.085599546 | 3.720726558 | -30.94431144 | 1.7533E-127 | 3.5056E-125 | 280.6184441 |
| GP2         | -2.256931855 | 2.087682712 | -30.94153581 | 1.8133E-127 | 3.5248E-125 | 280.5849364 |
| LINC00982   | -3.826188584 | 2.582084345 | -30.8803865  | 3.8039E-127 | 7.1945E-125 | 279.8454317 |
| LINC00864   | -2.436439339 | 2.193395983 | -30.79920272 | 1.0177E-126 | 1.8742E-124 | 278.8635956 |
| LINC01762   | -2.472987778 | 2.398295743 | -30.48251869 | 4.7552E-125 | 8.5326E-123 | 275.0273344 |
| TFAP2B      | -3.341208798 | 2.331963422 | -30.29518812 | 4.6393E-124 | 8.1165E-122 | 272.7531741 |
| CASR        | -4.587223571 | 2.933262362 | -29.9556416  | 2.9019E-122 | 4.9531E-120 | 268.62681   |
| RANBP3L     | -3.991596873 | 2.835250159 | -29.56485688 | 3.4255E-120 | 5.7075E-118 | 263.8649286 |
| AC016526.1  | -1.940124969 | 2.034107224 | -29.51701544 | 6.1479E-120 | 1.0005E-117 | 263.2821615 |
| RALYL       | -2.6075732   | 2.191560645 | -29.49317433 | 8.2287E-120 | 1.3087E-117 | 262.9908765 |
| SCNN1G      | -5.88971901  | 3.158468194 | -29.48546661 | 9.0421E-120 | 1.4061E-117 | 262.8958835 |
| PTGER1      | -3.304967427 | 2.521035606 | -29.47267366 | 1.0573E-119 | 1.6085E-117 | 262.7389544 |
| CLCNKA      | -5.412387947 | 3.225141945 | -29.42971563 | 1.7882E-119 | 2.6625E-117 | 262.2163264 |
| AC087045.3  | -2.593673075 | 2.19972104  | -29.41889563 | 2.0413E-119 | 2.976E-117  | 262.0842311 |
| AC007993.2  | -2.097749005 | 2.108767605 | -28.99199498 | 3.8092E-117 | 5.4402E-115 | 256.866773  |
| GABRD       | 3.419155009  | 5.118641805 | 28.97303669  | 4.8063E-117 | 6.7269E-115 | 256.5466989 |
| CLDN8       | -6.24793398  | 3.003804883 | -28.70436755 | 1.2998E-115 | 1.7836E-113 | 253.340519  |
| NHLRC4      | -2.462088046 | 3.101736628 | -28.65280016 | 2.449E-115  | 3.2958E-113 | 252.7111038 |
| AC092078.2  | -2.027840022 | 2.059223953 | -28.42410064 | 4.0728E-114 | 5.3776E-112 | 249.9063895 |
| CLCNKB      | -6.173761635 | 3.581874719 | -28.28081378 | 2.3742E-113 | 3.0768E-111 | 248.1442265 |
| PRR15       | -3.453123872 | 3.256808762 | -28.19407459 | 6.9064E-113 | 8.7875E-111 | 247.0812581 |
| SCNN1B      | -4.597495801 | 3.191126519 | -28.16130638 | 1.0339E-112 | 1.292E-110  | 246.6791519 |
| CA10        | -2.657448327 | 2.207085606 | -28.04291623 | 4.4445E-112 | 5.4566E-110 | 245.2221091 |

|            |              |             |              |             |             |             |
|------------|--------------|-------------|--------------|-------------|-------------|-------------|
| NRK        | -3.027661045 | 2.378676376 | -27.92414838 | 1.9209E-111 | 2.3177E-109 | 243.7590812 |
| AC124017.1 | -2.405049986 | 2.113484435 | -27.91873731 | 2.0535E-111 | 2.4356E-109 | 243.6960319 |
| GGT6       | -4.937232897 | 3.009709558 | -27.85942771 | 4.2664E-111 | 4.9761E-109 | 242.9657961 |
| CLDN19     | -4.620406346 | 3.049602492 | -27.78528258 | 1.0646E-110 | 1.2213E-108 | 242.05362   |
| WNK4       | -3.550772014 | 3.565512883 | -27.76119665 | 1.4329E-110 | 1.6174E-108 | 241.7592261 |
| CALB1      | -4.674928304 | 2.643393825 | -27.64567408 | 5.9605E-110 | 6.6209E-108 | 240.3323428 |
| LINC01983  | -2.024621943 | 2.05434197  | -27.64351822 | 6.1212E-110 | 6.6932E-108 | 240.3083728 |
| MCCD1      | -4.341263175 | 2.82726145  | -27.63422942 | 6.8648E-110 | 7.3907E-108 | 240.1919588 |
| ATP1A1     | -2.775609151 | 9.523119047 | -27.27030317 | 6.148E-108  | 6.5187E-106 | 235.6980907 |
| ADH1C      | -3.853377311 | 2.784770404 | -27.26141046 | 6.8622E-108 | 7.1674E-106 | 235.5951031 |
| IRX1       | -3.318925828 | 2.646228392 | -27.23239205 | 9.8228E-108 | 9.9907E-106 | 235.2358178 |
| TREM2      | 3.735068717  | 6.477220369 | 27.23216216  | 9.8508E-108 | 9.9907E-106 | 235.2331349 |
| SPTBN2     | -4.529027428 | 3.408390424 | -27.2287376  | 1.0277E-107 | 1.0274E-105 | 235.1971589 |
| LINC00887  | 3.619374042  | 5.268361543 | 27.2268298   | 1.0522E-107 | 1.0371E-105 | 235.0571853 |
| FAM3B      | -3.164018839 | 2.618970482 | -27.08727437 | 5.9085E-107 | 5.7427E-105 | 233.4452288 |
| GPC3       | -4.180629538 | 4.409485715 | -27.06689673 | 7.602E-107  | 7.2875E-105 | 233.2016646 |
| FABP6      | 4.059784789  | 5.672620502 | 27.04942794  | 9.4355E-107 | 8.9229E-105 | 232.8676729 |
| TMEM52B    | -4.833194968 | 3.528371236 | -27.01815299 | 1.3892E-106 | 1.2962E-104 | 232.5981792 |
| TYRP1      | -2.843662742 | 2.265698833 | -26.79742672 | 2.133E-105  | 1.964E-103  | 229.8677382 |
| RASL11B    | -3.749117914 | 3.107085333 | -26.65662945 | 1.2192E-104 | 1.108E-102  | 228.1304243 |
| DGCR5      | 3.484740419  | 5.441924657 | 26.56518218  | 3.784E-104  | 3.3949E-102 | 226.9246467 |
| NAT8L      | -3.542916975 | 2.608615213 | -26.54661151 | 4.7627E-104 | 4.2189E-102 | 226.7657122 |
| TMEM45B    | -3.525888262 | 3.552275106 | -26.53376831 | 5.5841E-104 | 4.8847E-102 | 226.6153478 |
| HSPA2      | -3.426182438 | 4.762909951 | -26.40411026 | 2.7837E-103 | 2.405E-101  | 225.0144955 |
| CDKN2A     | 1.82929342   | 3.482215215 | 26.36535168  | 4.5001E-103 | 3.8405E-101 | 224.3871733 |
| LINC01543  | -2.639573879 | 2.197814921 | -26.32689975 | 7.2476E-103 | 6.1107E-101 | 224.0528549 |
| AP000696.1 | -2.161530476 | 2.155782381 | -26.29705489 | 1.0492E-102 | 8.7407E-101 | 223.6861718 |
| AC104237.3 | -3.160491801 | 2.440874325 | -26.153178   | 6.2444E-102 | 5.141E-100  | 221.8993356 |
| LINC01571  | -2.150573129 | 2.07685633  | -26.06391628 | 1.8889E-101 | 1.537E-99   | 220.8015406 |
| NDUFA4L2   | 6.447529281  | 10.55943747 | 26.02568949  | 3.0345E-101 | 2.4409E-99  | 220.3312285 |
| SIM2       | -2.521864695 | 2.555643064 | -25.92162556 | 1.1032E-100 | 8.7298E-99  | 219.0371173 |
| PIK3C2G    | -2.552257036 | 2.19940277  | -25.92111547 | 1.1102E-100 | 8.7298E-99  | 219.0321161 |
| EHF        | -4.142749061 | 2.800511496 | -25.89627537 | 1.5109E-100 | 1.17483E-98 | 218.7224044 |
| NOL3       | 3.171392784  | 7.416275723 | 25.85926026  | 2.3915E-100 | 1.83911E-98 | 218.2745211 |
| AL049838.1 | -2.783263505 | 3.280073783 | -25.72288394 | 1.2988E-99  | 9.87953E-98 | 216.5782192 |
| TMPRSS2    | -4.464599179 | 2.981888695 | -25.48119168 | 2.60793E-98 | 1.9624E-96  | 213.5845826 |
| AL139280.1 | -2.982526189 | 2.289233442 | -25.43254466 | 4.77043E-98 | 3.55144E-96 | 212.9773938 |
| STC2       | 3.883899337  | 6.511803789 | 25.21778841  | 6.8626E-97  | 5.05521E-95 | 210.3123986 |
| CDCA2      | 2.920330983  | 4.72157482  | 25.18722204  | 1.00303E-96 | 7.3117E-95  | 209.8146538 |
| ATP6V1B1   | -5.136323581 | 3.596869569 | -25.14120937 | 1.776E-96   | 1.28128E-94 | 209.3742972 |
| SLC4A1     | -5.453197428 | 3.157166195 | -25.12439937 | 2.18823E-96 | 1.56258E-94 | 209.1627657 |
| TMEM213    | -6.135955965 | 3.191912178 | -25.12177219 | 2.26079E-96 | 1.59809E-94 | 209.1258923 |
| S100A2     | -3.655271006 | 4.446955458 | -25.09096487 | 3.31435E-96 | 2.31938E-94 | 208.7576911 |
| OVCH2      | -2.682209225 | 2.353867735 | -25.04653088 | 5.75475E-96 | 3.9873E-94  | 208.1965833 |
| AC007906.2 | -3.561343423 | 3.692186754 | -24.99485662 | 1.09322E-95 | 7.50035E-94 | 207.5648863 |
| APOC1      | 4.607815642  | 7.846132359 | 24.96691302  | 1.54672E-95 | 1.05087E-93 | 207.2235247 |
| ARMH4      | -2.61597732  | 3.086142138 | -24.96266481 | 1.63051E-95 | 1.09714E-93 | 207.1586574 |
| GATA3      | -3.419641227 | 4.192423932 | -24.94035382 | 2.15105E-95 | 1.43362E-93 | 206.8919903 |
| PROM2      | -4.418917558 | 3.465002132 | -24.69080684 | 4.77034E-94 | 3.14932E-92 | 203.7955041 |
| SMIM5      | -2.995606118 | 2.90075158  | -24.63284601 | 9.79843E-94 | 6.40836E-92 | 203.0689206 |
| BSND       | -4.317520113 | 2.58222308  | -24.6052045  | 1.38114E-93 | 8.94928E-92 | 202.7246197 |
| ERVE-1     | -2.492516332 | 2.198500802 | -24.52645517 | 3.67248E-93 | 2.3578E-91  | 201.7540648 |
| LINC01055  | -2.875526129 | 2.285546042 | -24.51724211 | 4.11763E-93 | 2.61956E-91 | 201.6359842 |
| SOST       | -2.8252719   | 2.239344302 | -24.48880072 | 5.8619E-93  | 3.69564E-91 | 201.2842144 |
| TMEM178A   | -2.808694938 | 3.535399792 | -24.38262872 | 2.19095E-92 | 1.36895E-90 | 199.9747012 |
| PLPPR1     | -3.419933353 | 2.550301532 | -24.37319647 | 2.4632E-92  | 1.52544E-90 | 199.8474534 |
| TRPV6      | -1.559324912 | 2.048316629 | -24.34391751 | 3.54322E-92 | 2.17504E-90 | 199.4852532 |
| ERVMER34-1 | -2.643709837 | 2.387756721 | -24.30386198 | 5.82649E-92 | 3.54554E-90 | 198.992996  |

|            |              |             |              |             |             |             |
|------------|--------------|-------------|--------------|-------------|-------------|-------------|
| HSF4       | 3.815262237  | 5.779851341 | 24.27695686  | 8.13759E-92 | 4.90921E-90 | 198.5748139 |
| AC090709.1 | -1.796256056 | 2.003186341 | -24.21846337 | 1.68236E-91 | 1.00625E-89 | 197.9355576 |
| CXCR4      | 2.968869636  | 8.750359734 | 23.91609313  | 7.18038E-90 | 4.25833E-88 | 194.1965401 |
| TNNC1      | -2.680625578 | 2.757217446 | -23.90293397 | 8.45437E-90 | 4.97174E-88 | 194.0255817 |
| MTURN      | -2.926171838 | 5.376400648 | -23.86016952 | 1.43745E-89 | 8.38274E-88 | 193.5066809 |
| PRRG2      | -2.611665107 | 3.259587749 | -23.78532992 | 3.63884E-89 | 2.10451E-87 | 192.5726886 |
| HILPDA     | 4.645211417  | 8.514553374 | 23.77494742  | 4.13922E-89 | 2.37429E-87 | 192.4558702 |
| CD70       | 4.649865184  | 6.361772402 | 23.74316111  | 6.14078E-89 | 3.49375E-87 | 191.9266143 |
| SLC52A3    | -2.666232116 | 3.250772835 | -23.71871639 | 8.31679E-89 | 4.69362E-87 | 191.7476998 |
| TFCP2L1    | -4.639530551 | 3.771065236 | -23.70991542 | 9.27647E-89 | 5.19334E-87 | 191.6446455 |
| GSTM3      | -3.213103059 | 5.485998661 | -23.60791691 | 3.28838E-88 | 1.82636E-86 | 190.3811435 |
| LILRB1     | 1.880791955  | 4.154238746 | 23.33972205  | 9.15279E-87 | 5.0434E-85  | 186.970393  |
| AC010655.2 | 2.223329154  | 3.850001202 | 23.29320224  | 1.62941E-86 | 8.90831E-85 | 186.3052005 |
| LINC00645  | -3.304595285 | 2.533835391 | -23.25958488 | 2.47184E-86 | 1.34092E-84 | 186.0572398 |
| ODF3B      | 2.897999263  | 5.665002876 | 23.25239905  | 2.70212E-86 | 1.45457E-84 | 185.9649057 |
| TMEM74B    | 1.964386491  | 3.970526231 | 23.24645917  | 2.90858E-86 | 1.55376E-84 | 185.7770023 |
| EPN3       | -2.767902949 | 2.479310523 | -23.18046077 | 6.59089E-86 | 3.49417E-84 | 185.0824728 |
| DDN        | -2.767419001 | 2.296117753 | -23.16878842 | 7.61673E-86 | 4.00766E-84 | 184.9390543 |
| MPP7       | -2.570930968 | 3.669571168 | -23.14461196 | 1.02775E-85 | 5.32756E-84 | 184.6481077 |
| F11        | -3.196369349 | 2.742512592 | -23.14487114 | 1.02446E-85 | 5.32756E-84 | 184.6404405 |
| DGCR9      | 2.225890879  | 4.147768516 | 23.12596943  | 1.29484E-85 | 6.66273E-84 | 184.2789503 |
| TNFAIP6    | 4.544069645  | 6.498547221 | 23.12064291  | 1.38319E-85 | 7.06538E-84 | 184.2561045 |
| RHCG       | -5.802783091 | 3.237990076 | -23.09755012 | 1.84142E-85 | 9.33785E-84 | 184.0579847 |
| TCF21      | -2.814291707 | 3.361844698 | -23.09423045 | 1.91874E-85 | 9.65995E-84 | 184.0221104 |
| AC104237.2 | -2.393091534 | 2.265278087 | -23.09337232 | 1.93925E-85 | 9.69347E-84 | 184.0107114 |
| AC107057.1 | -2.387555139 | 2.151369794 | -23.0683134  | 2.64529E-85 | 1.31289E-83 | 183.7016419 |
| ADGRF1     | -3.665405811 | 2.611744715 | -23.05612779 | 3.07637E-85 | 1.51609E-83 | 183.5416789 |
| ANGPTL4    | 5.455187428  | 9.951084388 | 23.04218938  | 3.65622E-85 | 1.78925E-83 | 183.3822865 |
| SCARB1     | 3.609440312  | 7.05561149  | 23.02986539  | 4.2593E-85  | 2.0699E-83  | 183.2409738 |
| AL035661.1 | -4.74849557  | 3.068268451 | -23.00483815 | 5.80739E-85 | 2.80277E-83 | 182.9170198 |
| ATP6V0A4   | -5.723469789 | 3.222657114 | -22.99592235 | 6.48551E-85 | 3.1086E-83  | 182.8019001 |
| TTC21B-AS1 | 3.746930852  | 5.117662502 | 22.8568098   | 3.63191E-84 | 1.72899E-82 | 180.8936288 |
| SLC16A3    | 3.020939069  | 7.180521976 | 22.76080407  | 1.19201E-83 | 5.59844E-82 | 179.9144674 |
| PARVG      | 1.733465309  | 3.950052943 | 22.75980718  | 1.20681E-83 | 5.63016E-82 | 179.7875437 |
| SLC4A11    | -2.740866036 | 2.973788662 | -22.73822027 | 1.57641E-83 | 7.30576E-82 | 179.6189434 |
| AP000757.1 | -2.832462549 | 3.254266587 | -22.71315504 | 2.14973E-83 | 9.89724E-82 | 179.312346  |
| ITGAX      | 2.3262601    | 4.679743604 | 22.64495209  | 4.999E-83   | 2.28647E-81 | 178.3977218 |
| REEP6      | -2.339356014 | 3.480069633 | -22.63146839 | 5.90648E-83 | 2.684E-81   | 178.3068921 |
| DDB2       | 1.857102051  | 5.982553594 | 22.58188419  | 1.0907E-82  | 4.92432E-81 | 177.7070873 |
| PRDM16     | -2.395296279 | 2.664001623 | -22.54661371 | 1.68714E-82 | 7.52013E-81 | 177.2555061 |
| AC019069.1 | 1.752340963  | 3.750710573 | 22.54859133  | 1.64638E-82 | 7.38548E-81 | 177.1396517 |
| GATA3-AS1  | -1.870300278 | 2.084443196 | -22.51892534 | 2.37604E-82 | 1.04576E-80 | 176.9160285 |
| SIGLEC8    | 2.174913439  | 3.843450374 | 22.53252826  | 2.00817E-82 | 8.8944E-81  | 176.9021049 |
| COL23A1    | 4.87177387   | 7.556864548 | 22.51400142  | 2.5252E-82  | 1.10446E-80 | 176.8525975 |
| FAM222A    | -2.166795391 | 3.130998843 | -22.4748254  | 4.09884E-82 | 1.7816E-80  | 176.3731696 |
| EMX1       | -2.416704342 | 4.30123067  | -22.45909361 | 4.97883E-82 | 2.15073E-80 | 176.1862078 |
| FAM167A    | -2.782151012 | 2.964325417 | -22.41696922 | 8.38052E-82 | 3.59797E-80 | 175.654071  |
| BMPR1B-DT  | -1.615695997 | 2.057644504 | -22.40933853 | 9.2094E-82  | 3.92972E-80 | 175.5575151 |
| LHX1-DT    | -3.121079057 | 2.474260088 | -22.40204221 | 1.00785E-81 | 4.27451E-80 | 175.4650076 |
| C1orf226   | -2.256431417 | 3.201148069 | -22.36858675 | 1.52391E-81 | 6.4243E-80  | 175.0623305 |
| HLA-F      | 2.311120399  | 7.484566835 | 22.35488139  | 1.80515E-81 | 7.56432E-80 | 174.8978597 |
| AL031123.1 | -3.234971446 | 2.875512155 | -22.32912873 | 2.48146E-81 | 1.03364E-79 | 174.5690639 |
| DOK3       | 1.72849503   | 4.215985639 | 22.30371459  | 3.39679E-81 | 1.40655E-79 | 174.1989496 |
| NPHS2      | -4.705848704 | 2.688806126 | -22.28579417 | 4.23851E-81 | 1.72448E-79 | 174.0367428 |
| SLC15A2    | -2.448751603 | 3.118604912 | -22.2831094  | 4.38143E-81 | 1.77233E-79 | 174.0067591 |
| TMEM30B    | -3.328234554 | 3.669106551 | -22.18942737 | 1.39345E-80 | 5.60421E-79 | 172.8603968 |
| CD68       | 1.561699525  | 3.594973534 | 22.12486103  | 3.0922E-80  | 1.23653E-78 | 171.916919  |
| LINC01976  | -1.74379027  | 2.061138061 | -22.11295578 | 3.58168E-80 | 1.42412E-78 | 171.908832  |

|            |              |             |              |             |             |             |
|------------|--------------|-------------|--------------|-------------|-------------|-------------|
| LINC00462  | 3.753916193  | 5.298312336 | 22.09630775  | 4.39869E-80 | 1.7391E-78  | 171.5235407 |
| TSPAN8     | -4.046823899 | 3.313317811 | -22.01974488 | 1.1314E-79  | 4.44807E-78 | 170.7679318 |
| TYMP       | 2.904378668  | 7.169319721 | 21.99411024  | 1.55223E-79 | 6.06844E-78 | 170.4616865 |
| AC079760.2 | 2.608178777  | 4.264744189 | 21.96452248  | 2.23589E-79 | 8.64461E-78 | 169.9005851 |
| CD300LF    | 1.807809971  | 3.970534349 | 21.92872173  | 3.4769E-79  | 1.33689E-77 | 169.5276871 |
| LINC02343  | -1.916094641 | 2.10305436  | -21.88993685 | 5.60886E-79 | 2.14485E-77 | 169.1679783 |
| FGF1       | -3.113644762 | 3.739855795 | -21.88718697 | 5.80227E-79 | 2.20676E-77 | 169.1402694 |
| SCNN1A     | -4.321131112 | 4.892762985 | -21.87286793 | 6.92246E-79 | 2.61856E-77 | 168.9604817 |
| SLC26A7    | -4.08793968  | 2.89369541  | -21.85419686 | 8.71393E-79 | 3.2785E-77  | 168.7236633 |
| KLRG2      | -2.521705826 | 2.28063323  | -21.80714141 | 1.55623E-78 | 5.8238E-77  | 168.1468997 |
| RNF150     | -2.633101179 | 3.36268735  | -21.77089152 | 2.4325E-78  | 9.00668E-77 | 167.7038689 |
| LINC02348  | 3.175189532  | 4.738727364 | 21.77564637  | 2.29409E-78 | 8.53939E-77 | 167.5681203 |
| FOXCUT     | -2.062473384 | 2.442558734 | -21.75312557 | 3.02765E-78 | 1.11513E-76 | 167.4875196 |
| HOXB9      | -3.631063389 | 3.82808295  | -21.67443193 | 7.98037E-78 | 2.92391E-76 | 166.5280598 |
| SDS        | 2.43224658   | 4.3940597   | 21.67045871  | 8.3805E-78  | 3.05452E-76 | 166.3264445 |
| CLUL1      | -1.648131614 | 2.361414457 | -21.64653242 | 1.12514E-77 | 4.07964E-76 | 166.1785507 |
| NR0B2      | -3.90004319  | 2.603794045 | -21.63051614 | 1.37036E-77 | 4.91783E-76 | 165.9689266 |
| ATP6V0D2   | -5.081078138 | 3.381815428 | -21.61028494 | 1.75787E-77 | 6.25624E-76 | 165.7318219 |
| LINC00379  | -2.900455979 | 2.611616895 | -21.61013173 | 1.76119E-77 | 6.25624E-76 | 165.7203948 |
| COL4A6     | -2.159260646 | 2.224472179 | -21.59707994 | 2.0681E-77  | 7.23627E-76 | 165.5700504 |
| RASAL3     | 1.923849331  | 4.493757674 | 21.59920862  | 2.01462E-77 | 7.08458E-76 | 165.5429939 |
| COL5A3     | 2.470715356  | 4.897415829 | 21.59982433  | 1.99941E-77 | 7.0666E-76  | 165.5361304 |
| INPP5J     | -3.476770657 | 3.096072048 | -21.56179459 | 3.19266E-77 | 1.10605E-75 | 165.1323665 |
| SUSD4      | -3.067354675 | 3.057471713 | -21.51620902 | 5.59399E-77 | 1.92841E-75 | 164.5714155 |
| TYROBP     | 2.778604186  | 8.72104923  | 21.51093106  | 5.96922E-77 | 2.04768E-75 | 164.5164631 |
| SLC2A12    | -2.288489631 | 2.522255646 | -21.51010105 | 6.03048E-77 | 2.0586E-75  | 164.5000563 |
| CHL1       | -2.824735874 | 2.821903915 | -21.49661659 | 7.11844E-77 | 2.41819E-75 | 164.3287686 |
| ESRRG      | -2.833616759 | 3.43780799  | -21.49251871 | 7.48641E-77 | 2.53091E-75 | 164.2864637 |
| SLC13A2    | -3.63184336  | 2.649963246 | -21.48370646 | 8.34341E-77 | 2.80708E-75 | 164.1667841 |
| ABHD17C    | -1.831840568 | 4.292197143 | -21.46167438 | 1.09399E-76 | 3.66304E-75 | 163.9128876 |
| LINC01020  | -1.673250065 | 2.039508365 | -21.43822724 | 1.45956E-76 | 4.86382E-75 | 163.6137812 |
| RNU1-106P  | 1.512937987  | 3.250831071 | 21.38556279  | 2.78859E-76 | 9.20498E-75 | 162.7733309 |
| AC138207.5 | 1.943263604  | 4.782319942 | 21.36240902  | 3.70651E-76 | 1.21775E-74 | 162.6709408 |
| EPB41L4B   | -2.456469806 | 2.442098712 | -21.35424243 | 4.09778E-76 | 1.33378E-74 | 162.5865739 |
| PIK3R5     | 1.747938981  | 3.980919054 | 21.35985839  | 3.82453E-76 | 1.25066E-74 | 162.547935  |
| ATP6V1C2   | -2.504634468 | 3.276117954 | -21.34372279 | 4.66323E-76 | 1.5108E-74  | 162.4597241 |
| CEL        | -2.21371992  | 2.488322746 | -21.33769315 | 5.02184E-76 | 1.61948E-74 | 162.3870339 |
| SEMA3B-AS1 | -2.495537976 | 2.984899844 | -21.32563738 | 5.82359E-76 | 1.86942E-74 | 162.2359177 |
| FAM81A     | -1.78598402  | 2.988585289 | -21.31848251 | 6.35866E-76 | 2.03187E-74 | 162.1563559 |
| EGLN3      | 4.074554866  | 8.207992561 | 21.31007963  | 7.05012E-76 | 2.23243E-74 | 162.0601688 |
| CHGB       | -2.928528379 | 2.675154832 | -21.31152025 | 6.92645E-76 | 2.20324E-74 | 162.0571908 |
| F11-AS1    | -1.814106097 | 2.202759507 | -21.30509429 | 7.49538E-76 | 2.3579E-74  | 161.9881767 |
| NNMT       | 4.475335081  | 9.752247505 | 21.30489494  | 7.51375E-76 | 2.3579E-74  | 161.9867827 |
| RAB25      | -4.411428335 | 3.198064127 | -21.29459429 | 8.52723E-76 | 2.664E-74   | 161.8602642 |
| PDE1A      | -2.928197996 | 4.60716802  | -21.22266963 | 2.06251E-75 | 6.41485E-74 | 160.9895022 |
| SYT7       | -2.690668082 | 2.730600607 | -21.21102479 | 2.37947E-75 | 7.36794E-74 | 160.8283708 |
| FGF9       | -3.499476779 | 2.56141796  | -21.18803445 | 3.15531E-75 | 9.72724E-74 | 160.5411874 |
| FCGR3A     | 3.404016148  | 7.685196958 | 21.18391325  | 3.31901E-75 | 1.0187E-73  | 160.5145832 |
| HLA-B      | 1.963595733  | 12.49038654 | 21.1624601   | 4.3187E-75  | 1.31975E-73 | 160.2218325 |
| SCD        | 3.292880607  | 8.49880128  | 21.1544859   | 4.76268E-75 | 1.4491E-73  | 160.1458444 |
| NPHS1      | -3.052605787 | 2.485608319 | -21.15046613 | 5.00349E-75 | 1.51578E-73 | 160.0828607 |
| LAPTM5     | 2.708302295  | 8.838299134 | 21.13798834  | 5.8313E-75  | 1.75894E-73 | 159.9467903 |
| SLC12A3    | -5.170788051 | 2.941340036 | -21.1359794  | 5.97682E-75 | 1.7951E-73  | 159.9125704 |
| MTCP1      | 1.912031269  | 4.138284748 | 21.11117038  | 8.10314E-75 | 2.42332E-73 | 159.5024505 |
| SLC4A9     | -2.823038915 | 2.401696651 | -21.09817163 | 9.50389E-75 | 2.83014E-73 | 159.445785  |
| NPTX2      | 4.820596786  | 6.582537057 | 21.09681955  | 9.66282E-75 | 2.86527E-73 | 159.2997157 |
| DANCR      | -1.71221868  | 5.465004936 | -21.08238044 | 1.1535E-74  | 3.40598E-73 | 159.2704153 |
| ACSF2      | -2.428598469 | 4.475745399 | -21.04168869 | 1.89988E-74 | 5.58627E-73 | 158.7722571 |

|            |              |             |              |             |             |             |
|------------|--------------|-------------|--------------|-------------|-------------|-------------|
| KLK6       | -2.698739982 | 2.326217322 | -21.01700633 | 2.57123E-74 | 7.52866E-73 | 158.4548458 |
| ENPP6      | -2.391137756 | 2.472467949 | -20.9693798  | 4.60946E-74 | 1.33846E-72 | 157.8757725 |
| KLHL14     | -2.414471959 | 2.697373229 | -20.96578834 | 4.81685E-74 | 1.39291E-72 | 157.8305111 |
| LINC02188  | 2.33602353   | 4.371128642 | 20.97524936  | 4.28956E-74 | 1.25076E-72 | 157.8097609 |
| ARL4D      | -3.003702888 | 4.83105637  | -20.93895037 | 6.69225E-74 | 1.92726E-72 | 157.5181075 |
| SLC7A8     | -3.255864893 | 4.919561013 | -20.92455988 | 7.98241E-74 | 2.28938E-72 | 157.3406905 |
| VIM        | 2.666943908  | 11.58150175 | 20.91959132  | 8.48334E-74 | 2.42312E-72 | 157.2629614 |
| C16orf89   | -3.232929236 | 3.367692759 | -20.90772573 | 9.81039E-74 | 2.79078E-72 | 157.1256277 |
| PCED1B-AS1 | 1.772880168  | 4.154098946 | 20.90547964  | 1.0084E-73  | 2.857E-72   | 157.0110176 |
| SLC16A5    | -2.660416322 | 4.349640905 | -20.86715279 | 1.6124E-73  | 4.53155E-72 | 156.6395508 |
| TACSTD2    | -4.420068825 | 5.559364919 | -20.86828294 | 1.59024E-73 | 4.48729E-72 | 156.6381302 |
| SAP30      | 2.284982999  | 6.257294194 | 20.85670144  | 1.83251E-73 | 5.12955E-72 | 156.5186271 |
| ADM        | 2.813278523  | 8.467255803 | 20.85583452  | 1.85206E-73 | 5.16363E-72 | 156.4950024 |
| EFHD1      | -2.807174471 | 6.735509763 | -20.82499585 | 2.70152E-73 | 7.50207E-72 | 156.1112229 |
| TNFSF9     | 2.4843983    | 4.768142786 | 20.79883495  | 3.721E-73   | 1.02923E-71 | 155.7027565 |
| NETO2      | 2.715296149  | 5.572133644 | 20.77654014  | 4.88808E-73 | 1.34672E-71 | 155.5102985 |
| MECOM      | -2.608539134 | 5.026423061 | -20.75274758 | 6.53962E-73 | 1.79468E-71 | 155.244331  |
| LIPH       | -3.046649891 | 2.985497038 | -20.73549842 | 8.07579E-73 | 2.199E-71   | 155.0156762 |
| AC114803.1 | 2.096330125  | 3.658540303 | 20.75031979  | 6.73675E-73 | 1.84155E-71 | 154.9888931 |
| AC112243.1 | -1.700300574 | 1.977239366 | -20.72946811 | 8.69394E-73 | 2.35815E-71 | 154.9388268 |
| PSMB8      | 1.602114088  | 8.629940994 | 20.72038361  | 9.71558E-73 | 2.62508E-71 | 154.8479804 |
| HK2        | 3.133879751  | 6.184938546 | 20.62897434  | 2.97015E-72 | 7.96363E-71 | 153.7275437 |
| FOLR3      | -2.441681355 | 2.466952956 | -20.59884617 | 4.29191E-72 | 1.14637E-70 | 153.3525652 |
| FLRT1      | -1.798373319 | 2.218048824 | -20.57859894 | 5.49627E-72 | 1.45693E-70 | 153.1099916 |
| AC026369.2 | 2.422310996  | 4.729719088 | 20.58078861  | 5.35121E-72 | 1.42387E-70 | 153.0466402 |
| COBLL1     | -2.285740032 | 4.998384661 | -20.44523558 | 2.79974E-71 | 7.39342E-70 | 151.4967438 |
| AQP6       | -4.100394273 | 2.628039224 | -20.43132141 | 3.3177E-71  | 8.72829E-70 | 151.3052432 |
| TMSB10     | 2.144667523  | 13.60238506 | 20.42973162  | 3.38267E-71 | 8.8328E-70  | 151.2695301 |
| P2RX7      | 1.896351298  | 4.42921548  | 20.43052652  | 3.35003E-71 | 8.78033E-70 | 151.243052  |
| KLK7       | -2.155374241 | 2.150033554 | -20.39720277 | 5.02995E-71 | 1.30369E-69 | 150.9019    |
| SLC6A3     | 4.700053367  | 6.297885913 | 20.40964635  | 4.32172E-71 | 1.12429E-69 | 150.8765723 |
| FATE1      | 1.682408358  | 3.577272423 | 20.38856997  | 5.58834E-71 | 1.44307E-69 | 150.6163626 |
| HSD11B2    | -3.859021845 | 6.813429457 | -20.34380349 | 9.64507E-71 | 2.48148E-69 | 150.2399834 |
| FAM78A     | 1.654118626  | 4.222039682 | 20.3344947   | 1.08039E-70 | 2.76944E-69 | 150.0762747 |
| SUCLG1     | -1.600457037 | 7.12828002  | -20.32649734 | 1.19099E-70 | 3.04181E-69 | 150.0442329 |
| AP1M2      | -2.915277098 | 5.254769693 | -20.3257934  | 1.20125E-70 | 3.05686E-69 | 150.0420128 |
| PLCL1      | -2.512439193 | 4.402781408 | -20.32026794 | 1.28493E-70 | 3.25794E-69 | 149.975547  |
| PLA2G4F    | -3.205528788 | 2.472606129 | -20.31379792 | 1.39033E-70 | 3.51247E-69 | 149.8741307 |
| ERBB4      | -2.73918258  | 2.495250119 | -20.30659571 | 1.51786E-70 | 3.80717E-69 | 149.7910844 |
| GNLY       | 2.100293441  | 4.404704573 | 20.2960412   | 1.72616E-70 | 4.29881E-69 | 149.574577  |
| AC007326.1 | 2.512122507  | 4.047096475 | 20.29643104  | 1.71798E-70 | 4.29372E-69 | 149.4590214 |
| L1CAM      | -3.979095523 | 3.315610458 | -20.27701112 | 2.17652E-70 | 5.40117E-69 | 149.4425797 |
| ESM1       | 3.654962526  | 8.55269759  | 20.25014028  | 3.01923E-70 | 7.46593E-69 | 149.1173876 |
| KCNK13     | -1.91917498  | 3.257895175 | -20.24266899 | 3.30681E-70 | 8.14827E-69 | 149.0259767 |
| TMIGD3     | 2.015633798  | 4.383761677 | 20.23044547  | 3.83751E-70 | 9.42276E-69 | 148.7853842 |
| MYO1F      | 1.949405613  | 4.690113836 | 20.21270776  | 4.7625E-70  | 1.16531E-68 | 148.6247229 |
| SIGLEC10   | 2.147627126  | 4.558636975 | 20.18672     | 6.53451E-70 | 1.59333E-68 | 148.2619776 |
| LRRC2      | -2.287245023 | 2.556072893 | -20.16484257 | 8.52777E-70 | 2.07213E-68 | 148.075824  |
| TRPM2      | 1.624352874  | 3.883581297 | 20.16104043  | 8.93156E-70 | 2.16274E-68 | 147.9143046 |
| IL2RB      | 2.320403097  | 4.91543705  | 20.12578435  | 1.3715E-69  | 3.30958E-68 | 147.5547622 |
| TNFRSF4    | 2.260098814  | 4.744938418 | 20.11737798  | 1.51915E-69 | 3.65326E-68 | 147.434043  |
| COL26A1    | -2.250454153 | 2.284845292 | -20.07865978 | 2.43258E-69 | 5.79021E-68 | 147.0320164 |
| VTCN1      | -3.958083204 | 2.950571286 | -20.05183179 | 3.37052E-69 | 7.99557E-68 | 146.7019937 |
| CAV2       | 1.932330507  | 7.017060746 | 20.04817017  | 3.52391E-69 | 8.33119E-68 | 146.6682712 |
| TJP3       | -2.379934826 | 2.843124824 | -20.00423731 | 6.00982E-69 | 1.4113E-67  | 146.1270955 |
| SFTA1P     | 1.706864259  | 3.357807454 | 19.98251442  | 7.82449E-69 | 1.8313E-67  | 145.6461924 |
| FCER1G     | 2.551668883  | 7.887942693 | 19.95704296  | 1.06609E-68 | 2.48682E-67 | 145.5624485 |
| ST8SIA4    | 2.690379298  | 5.239735414 | 19.95645935  | 1.07367E-68 | 2.49619E-67 | 145.5013888 |

|            |              |             |              |             |             |             |
|------------|--------------|-------------|--------------|-------------|-------------|-------------|
| TNNI1      | -1.684373959 | 2.224190535 | -19.948431   | 1.1836E-68  | 2.74265E-67 | 145.4536667 |
| AL096799.1 | 2.753468503  | 4.473196054 | 19.94533462  | 1.22894E-68 | 2.83832E-67 | 145.220477  |
| DCXR       | -1.953605181 | 6.62204027  | -19.89055331 | 2.3894E-68  | 5.48229E-67 | 144.7580835 |
| ENO2       | 3.134336928  | 7.624263945 | 19.87512303  | 2.88133E-68 | 6.58939E-67 | 144.5769557 |
| WNT9B      | -1.865975785 | 2.321641506 | -19.86609489 | 3.21482E-68 | 7.30433E-67 | 144.4599731 |
| DGCR10     | 1.685705808  | 3.545174348 | 19.87154991  | 3.00897E-68 | 6.85889E-67 | 144.3345977 |
| PROX1      | -2.447135821 | 2.570131302 | -19.85124744 | 3.8492E-68  | 8.68925E-67 | 144.2732445 |
| RASD2      | 2.143529275  | 4.551106157 | 19.84871648  | 3.96919E-68 | 8.93131E-67 | 144.1666938 |
| LINC01094  | 1.570457712  | 3.682285991 | 19.8535418   | 3.74356E-68 | 8.47814E-67 | 144.1578844 |
| FER1L4     | 2.037369678  | 3.667096714 | 19.83861781  | 4.48632E-68 | 1.00626E-66 | 143.9081998 |
| INHBB      | 3.439009322  | 6.502837156 | 19.81563211  | 5.92834E-68 | 1.31703E-66 | 143.8549061 |
| GRIK3      | 2.25177905   | 3.914178398 | 19.82918383  | 5.03006E-68 | 1.12461E-66 | 143.8006902 |
| CD300A     | 2.444485417  | 5.392745259 | 19.80943214  | 6.39112E-68 | 1.41535E-66 | 143.7641792 |
| PAPPA      | -2.263654664 | 2.839064168 | -19.76962567 | 1.03541E-67 | 2.28574E-66 | 143.2888598 |
| VEGFA      | 3.299601138  | 8.953039204 | 19.76163845  | 1.14063E-67 | 2.5101E-66  | 143.1981598 |
| GABRA2     | -2.058394686 | 2.115795396 | -19.74654323 | 1.36953E-67 | 3.00438E-66 | 143.0129435 |
| AC097534.2 | 1.920954769  | 4.396297637 | 19.74108614  | 1.46313E-67 | 3.19968E-66 | 142.8692099 |
| ATP6V1G3   | -4.468032087 | 2.748562801 | -19.7285887  | 1.70226E-67 | 3.71104E-66 | 142.7879907 |
| MAN1C1     | -2.199742858 | 3.736936618 | -19.72004271 | 1.8879E-67  | 4.10296E-66 | 142.6956513 |
| AVPR2      | -2.51338793  | 3.058718811 | -19.70776476 | 2.19056E-67 | 4.74598E-66 | 142.539544  |
| SSC4D      | -1.64148682  | 2.958481451 | -19.70208765 | 2.34644E-67 | 5.06803E-66 | 142.4828954 |
| GMPR       | -2.420959955 | 4.580087383 | -19.6840158  | 2.92035E-67 | 6.28819E-66 | 142.2679794 |
| DNASE1     | -2.021236002 | 3.40418661  | -19.68175982 | 3.00121E-67 | 6.44247E-66 | 142.2324478 |
| AL161668.4 | -1.569247428 | 2.143996985 | -19.67450782 | 3.27659E-67 | 7.01211E-66 | 142.1353165 |
| MYO3B      | -2.65920201  | 2.551282032 | -19.65499626 | 4.1494E-67  | 8.8529E-66  | 141.8987941 |
| CD247      | 1.747902109  | 4.135755775 | 19.6535084   | 4.22479E-67 | 8.98635E-66 | 141.7967842 |
| GRHL2      | -2.706976528 | 2.424599127 | -19.58750104 | 9.38857E-67 | 1.98493E-65 | 141.0844126 |
| ITLN1      | -1.792476677 | 2.27115033  | -19.58506338 | 9.66944E-67 | 2.03816E-65 | 141.0644239 |
| VGLL1      | -2.287890363 | 2.138156714 | -19.5782778  | 1.04963E-66 | 2.19919E-65 | 140.9811329 |
| OSCAR      | 1.596532964  | 3.962893453 | 19.57196517  | 1.13288E-66 | 2.36654E-65 | 140.8024075 |
| AC019080.1 | -1.791767929 | 2.976549894 | -19.5520115  | 1.44194E-66 | 3.00319E-65 | 140.6696803 |
| AHNAK2     | 2.669639089  | 4.903407647 | 19.53470307  | 1.77747E-66 | 3.69102E-65 | 140.3487474 |
| SOWAHA     | -2.527333851 | 2.897474256 | -19.5152788  | 2.24772E-66 | 4.65371E-65 | 140.216347  |
| CRHBP      | -2.950505771 | 3.167171978 | -19.51334398 | 2.30089E-66 | 4.74973E-65 | 140.1941152 |
| C3         | 4.318628063  | 9.405545985 | 19.49749075  | 2.7866E-66  | 5.71866E-65 | 140.0092686 |
| LINP1      | 1.679762442  | 3.584889933 | 19.50140077  | 2.65804E-66 | 5.47086E-65 | 139.8678245 |
| SIRLNT     | -1.681764972 | 2.033122612 | -19.47008476 | 3.88001E-66 | 7.89311E-65 | 139.6687979 |
| FCGR1A     | 1.80516962   | 4.035888938 | 19.47524479  | 3.6456E-66  | 7.43788E-65 | 139.6157308 |
| LZTS3      | -2.269205256 | 4.518608743 | -19.45898655 | 4.43644E-66 | 8.99891E-65 | 139.5533708 |
| GMFG       | 1.80531094   | 7.017503391 | 19.43360864  | 6.02692E-66 | 1.21897E-64 | 139.2431939 |
| MIR210HG   | 2.664757513  | 5.697759908 | 19.43000338  | 6.29499E-66 | 1.26952E-64 | 139.1950995 |
| ERMP1      | -2.255809415 | 5.926326183 | -19.42624888 | 6.58682E-66 | 1.32456E-64 | 139.1576715 |
| RHBDF2     | 1.737305171  | 5.535985051 | 19.40246811  | 8.77635E-66 | 1.7598E-64  | 138.8825836 |
| HLA-A      | 1.702844821  | 12.11959768 | 19.39730854  | 9.3401E-66  | 1.86749E-64 | 138.781042  |
| AC079310.1 | -1.671106198 | 1.974768597 | -19.39596111 | 9.49318E-66 | 1.89269E-64 | 138.7723387 |
| LAIR1      | 2.097670432  | 4.872162195 | 19.37583307  | 1.21023E-65 | 2.40603E-64 | 138.5124903 |
| CD40       | 1.801561865  | 6.943059217 | 19.33028799  | 2.09604E-65 | 4.14352E-64 | 138.000584  |
| COLGALT1   | 1.695610372  | 7.336352625 | 19.32112251  | 2.34091E-65 | 4.61456E-64 | 137.8897509 |
| PRKAR2B    | -1.839984377 | 3.876087531 | -19.31292536 | 2.58402E-65 | 5.0511E-64  | 137.7912663 |
| MAL        | -4.816579393 | 6.584669413 | -19.31373493 | 2.55893E-65 | 5.01607E-64 | 137.7787456 |
| LILRB4     | 2.026777155  | 4.326298427 | 19.3173782   | 2.44898E-65 | 4.81404E-64 | 137.7326183 |
| AC104984.4 | -2.388637223 | 2.493324374 | -19.30648179 | 2.7927E-65  | 5.44381E-64 | 137.7056141 |
| KLHL13     | -1.94091748  | 3.920199815 | -19.28609825 | 3.57028E-65 | 6.94022E-64 | 137.4688117 |
| SHMT2      | 1.9492696    | 7.922910161 | 19.27515105  | 4.07365E-65 | 7.89678E-64 | 137.3384543 |
| LY86       | 2.326465839  | 5.701492049 | 19.26054972  | 4.85705E-65 | 9.38941E-64 | 137.1715938 |
| PSMB9      | 2.041107035  | 6.930241952 | 19.2542282   | 5.24132E-65 | 1.01043E-63 | 137.0885031 |
| GCGR       | -2.930055796 | 2.419838043 | -19.25242676 | 5.35628E-65 | 1.02976E-63 | 137.0485451 |
| FBXO2      | -2.513602413 | 3.775168564 | -19.23806712 | 6.36748E-65 | 1.22081E-63 | 136.8914518 |

|            |              |             |              |             |             |             |
|------------|--------------|-------------|--------------|-------------|-------------|-------------|
| AL021328.1 | 1.852872283  | 3.733980904 | 19.20547956  | 9.42662E-65 | 1.80239E-63 | 136.3084471 |
| SLC9A2     | -2.593847715 | 2.473419484 | -19.18462439 | 1.21161E-64 | 2.31031E-63 | 136.2388466 |
| GAL3ST4    | 2.148339864  | 4.806565647 | 19.18227166  | 1.2464E-64  | 2.3702E-63  | 136.1712147 |
| IGSF6      | 2.122603304  | 4.999053451 | 19.17928113  | 1.29207E-64 | 2.45039E-63 | 136.1624948 |
| TRPV2      | 1.792261273  | 5.413557504 | 19.17550571  | 1.35212E-64 | 2.55734E-63 | 136.1544913 |
| FOXI1      | -4.584232074 | 2.803721152 | -19.16297284 | 1.57218E-64 | 2.95568E-63 | 135.9795923 |
| CD1D       | 1.800040628  | 4.62318033  | 19.16280239  | 1.57541E-64 | 2.95568E-63 | 135.9529225 |
| MYO1G      | 1.552534212  | 3.759161062 | 19.16523077  | 1.53005E-64 | 2.88606E-63 | 135.8787373 |
| DMRT2      | -3.904095129 | 2.661611238 | -19.14387223 | 1.97827E-64 | 3.70158E-63 | 135.7440929 |
| HOXB-AS3   | -2.335713828 | 3.077859743 | -19.13489941 | 2.20369E-64 | 4.11239E-63 | 135.646559  |
| RGS19      | 1.597579515  | 5.545482156 | 19.13033044  | 2.32816E-64 | 4.33311E-63 | 135.613469  |
| SEMA6D     | -2.354796711 | 3.607988749 | -19.12915324 | 2.36135E-64 | 4.38323E-63 | 135.5823351 |
| MAPK4      | -2.148083495 | 2.215160738 | -19.12588228 | 2.45608E-64 | 4.547E-63   | 135.5415924 |
| LAMA4      | 2.56175794   | 6.276846049 | 19.08904033  | 3.82466E-64 | 6.99299E-63 | 135.1193098 |
| ANKRD2     | -2.930504755 | 2.973481734 | -19.08767646 | 3.88787E-64 | 7.08524E-63 | 135.0751047 |
| PNCK       | 3.907833683  | 5.517907979 | 19.10388706  | 3.19956E-64 | 5.89224E-63 | 135.0745277 |
| EPCAM      | -3.236292244 | 6.898329711 | -19.07918003 | 4.30584E-64 | 7.82656E-63 | 134.9719106 |
| RGS1       | 3.119039027  | 6.927765564 | 19.07047268  | 4.78078E-64 | 8.66733E-63 | 134.8967342 |
| LINC02048  | 1.524756736  | 3.106555892 | 19.08898391  | 3.82726E-64 | 6.99299E-63 | 134.8542721 |
| LST1       | 2.009566183  | 5.461101442 | 19.05479887  | 5.77142E-64 | 1.04363E-62 | 134.7046377 |
| SPI1       | 2.226005326  | 6.32829131  | 19.04675371  | 6.35704E-64 | 1.14656E-62 | 134.6102304 |
| IDO1       | 2.988689832  | 5.510027841 | 19.03914593  | 6.96532E-64 | 1.25304E-62 | 134.4513341 |
| DIO1       | -3.294122254 | 2.927970964 | -19.03421877 | 7.38995E-64 | 1.32602E-62 | 134.4335024 |
| XPNPEP2    | -3.876129897 | 3.299512481 | -19.02631126 | 8.12614E-64 | 1.45439E-62 | 134.3496856 |
| LGALS9     | 1.967793872  | 5.663562952 | 19.00973962  | 9.91521E-64 | 1.77007E-62 | 134.1687263 |
| PCCB       | -1.655712644 | 4.919549316 | -19.0060012  | 1.03704E-63 | 1.84661E-62 | 134.1126308 |
| TMEM61     | -3.166650276 | 2.685467419 | -18.9882689  | 1.28304E-63 | 2.27885E-62 | 133.8796318 |
| GAL3ST3    | -2.143963433 | 2.264945984 | -18.98411261 | 1.34866E-63 | 2.38935E-62 | 133.843067  |
| FREM1      | -2.490246049 | 2.719833628 | -18.96151796 | 1.76872E-63 | 3.12563E-62 | 133.5658478 |
| TNFRSF14   | 1.937248181  | 6.867524467 | 18.94923723  | 2.04949E-63 | 3.6036E-62  | 133.43234   |
| FECH       | -1.75012184  | 5.693825467 | -18.92784811 | 2.64891E-63 | 4.59976E-62 | 133.1811103 |
| CSF3R      | 1.624247537  | 3.880841257 | 18.93865698  | 2.32683E-63 | 4.08099E-62 | 133.1746089 |
| STAMBPL1   | 1.575927503  | 4.037354305 | 18.93541658  | 2.41905E-63 | 4.23212E-62 | 133.1713423 |
| E2F1       | 1.504824493  | 4.088654751 | 18.93306614  | 2.48821E-63 | 4.34227E-62 | 133.1595506 |
| NXPH4      | 2.99223195   | 5.279035562 | 18.92997631  | 2.58215E-63 | 4.495E-62   | 133.1028502 |
| SEMA5B     | 3.417248091  | 6.755858048 | 18.90077961  | 3.66459E-63 | 6.33205E-62 | 132.8637553 |
| PLEKHB1    | -2.151534085 | 3.476506419 | -18.89463075 | 3.94492E-63 | 6.79964E-62 | 132.7740632 |
| AC092813.2 | -1.963929924 | 2.19748981  | -18.87595671 | 4.93451E-63 | 8.46365E-62 | 132.5500988 |
| MT1H       | -4.467024483 | 3.763833503 | -18.87489419 | 4.99775E-63 | 8.55116E-62 | 132.5441667 |
| CYP2B6     | -2.14903567  | 2.255108699 | -18.83878156 | 7.70338E-63 | 1.31484E-61 | 132.1056734 |
| TUBB2B     | -2.312351501 | 3.260250638 | -18.83644606 | 7.92192E-63 | 1.34885E-61 | 132.0759362 |
| MFSD6L     | -2.044997657 | 2.326493907 | -18.79455237 | 1.30826E-62 | 2.21675E-61 | 131.5783048 |
| ANXA9      | -1.890157656 | 5.424279544 | -18.78969012 | 1.38666E-62 | 2.34392E-61 | 131.5306291 |
| DOC2A      | 2.555084925  | 4.183348781 | 18.80338     | 1.17705E-62 | 1.99928E-61 | 131.4609565 |
| CNTN1      | -2.655789794 | 2.658656732 | -18.76118681 | 1.95036E-62 | 3.28091E-61 | 131.169822  |
| RN7SL138P  | 1.680183283  | 4.408785077 | 18.74760376  | 2.29451E-62 | 3.85059E-61 | 130.9763812 |
| CPAMD8     | -2.043569356 | 3.254399594 | -18.72475618 | 3.01559E-62 | 5.02455E-61 | 130.7454724 |
| LAT2       | 1.671112382  | 4.52859867  | 18.71583754  | 3.35498E-62 | 5.57675E-61 | 130.6104488 |
| SASH3      | 2.282406108  | 5.61120108  | 18.7050406   | 3.81728E-62 | 6.33017E-61 | 130.5222683 |
| HADH       | -1.635679516 | 6.838246401 | -18.68409047 | 4.9036E-62  | 8.09325E-61 | 130.2647288 |
| DNER       | -3.228798001 | 3.033387816 | -18.66308523 | 6.30274E-62 | 1.0378E-60  | 130.0018637 |
| RAB11FIP4  | -1.502446109 | 3.418487737 | -18.65821489 | 6.68038E-62 | 1.0974E-60  | 129.9602165 |
| GZMH       | 2.363133077  | 5.127110688 | 18.64372262  | 7.94308E-62 | 1.30177E-60 | 129.7515387 |
| TTC36      | -1.652715624 | 2.667821614 | -18.63805413 | 8.4995E-62  | 1.38971E-60 | 129.7175437 |
| TNFAIP8L2  | 1.910198872  | 5.078661091 | 18.61229195  | 1.15612E-61 | 1.88151E-60 | 129.4075756 |
| AL031710.1 | -2.930090589 | 3.250494632 | -18.60913975 | 1.20045E-61 | 1.94914E-60 | 129.3633663 |
| NKG7       | 3.10482873   | 6.837030914 | 18.60692169  | 1.23267E-61 | 1.9922E-60  | 129.3611915 |
| GAS6-AS1   | 1.676566018  | 3.492044629 | 18.62516008  | 9.9145E-62  | 1.61729E-60 | 129.3456572 |

|             |              |             |              |             |             |             |
|-------------|--------------|-------------|--------------|-------------|-------------|-------------|
| NUPR2       | -3.265162353 | 2.59268158  | -18.60795053 | 1.21762E-61 | 1.97243E-60 | 129.3379863 |
| AC007406.3  | 2.004001816  | 4.193994389 | 18.57592005  | 1.78462E-61 | 2.8776E-60  | 128.8393483 |
| AL353152.1  | -1.904185723 | 2.244064382 | -18.536376   | 2.86036E-61 | 4.5805E-60  | 128.5022874 |
| RBP2        | -1.549529604 | 2.23582285  | -18.53596706 | 2.87434E-61 | 4.59239E-60 | 128.492232  |
| GPSM3       | 1.872534473  | 6.604228844 | 18.53203849  | 3.01221E-61 | 4.77992E-60 | 128.4588593 |
| UPP2        | -2.371608853 | 2.740729006 | -18.53304226 | 2.97637E-61 | 4.73378E-60 | 128.4573311 |
| ENPP3       | 4.649358744  | 7.848623754 | 18.53117274  | 3.04347E-61 | 4.8186E-60  | 128.4567373 |
| SLA2        | 1.560805929  | 3.671143988 | 18.53331422  | 2.96673E-61 | 4.7292E-60  | 128.3063967 |
| AC106772.2  | -1.888114989 | 2.137845844 | -18.51579552 | 3.65593E-61 | 5.77522E-60 | 128.25588   |
| MIR4435-2HG | 1.544367404  | 4.626213607 | 18.50465651  | 4.17512E-61 | 6.58051E-60 | 128.1178013 |
| KCTD1       | -1.801623498 | 3.793251112 | -18.48306976 | 5.40012E-61 | 8.49214E-60 | 127.872283  |
| SLC16A1     | 2.202979067  | 6.537264929 | 18.47804228  | 5.73351E-61 | 8.97609E-60 | 127.8226681 |
| IGFBP3      | 3.453787797  | 11.00070127 | 18.4734237   | 6.05787E-61 | 9.46272E-60 | 127.7576027 |
| SLC15A4     | 1.723122005  | 6.611140025 | 18.47142974  | 6.20351E-61 | 9.66864E-60 | 127.7367497 |
| LINC01077   | 2.71285809   | 4.226694685 | 18.48061236  | 5.56059E-61 | 8.72489E-60 | 127.6021456 |
| SLC22A8     | -3.601175332 | 2.691873183 | -18.45476744 | 7.56559E-61 | 1.17653E-59 | 127.5176749 |
| AIF1L       | -3.556640547 | 7.201722009 | -18.41478312 | 1.21792E-60 | 1.8898E-59  | 127.0421274 |
| GAS2L3      | 2.385732049  | 4.97636128  | 18.38953923  | 1.64475E-60 | 2.54645E-59 | 126.7037212 |
| MRAP2       | -2.034499222 | 2.470932585 | -18.38049674 | 1.83158E-60 | 2.82945E-59 | 126.6509862 |
| TNNT2       | -1.689523397 | 2.118361069 | -18.37371235 | 1.98555E-60 | 3.06054E-59 | 126.564582  |
| ZNF503      | -1.819316896 | 5.237251261 | -18.36441001 | 2.21788E-60 | 3.40366E-59 | 126.4699335 |
| C1QB        | 2.987422346  | 9.430105289 | 18.32236005  | 3.65669E-60 | 5.58723E-59 | 125.9686978 |
| SELPLG      | 2.104623212  | 6.061909801 | 18.30405518  | 4.54539E-60 | 6.89993E-59 | 125.7633032 |
| ARHGAP9     | 1.637066378  | 4.100031295 | 18.31244685  | 4.11396E-60 | 6.27222E-59 | 125.7537385 |
| BATF        | 1.878310923  | 4.22639603  | 18.31146086  | 4.16245E-60 | 6.33236E-59 | 125.725042  |
| RUNX3       | 2.171079933  | 4.881190158 | 18.29819419  | 4.87325E-60 | 7.3816E-59  | 125.6334588 |
| ANGPTL1     | -2.538355796 | 3.249346712 | -18.28608919 | 5.62703E-60 | 8.50496E-59 | 125.5276671 |
| TMEM91      | 2.898142655  | 6.046217054 | 18.2733063   | 6.54976E-60 | 9.85704E-59 | 125.3882843 |
| PCP4        | -3.809622216 | 3.064511401 | -18.26964188 | 6.84113E-60 | 1.02734E-58 | 125.3313052 |
| ERP27       | -3.046315307 | 3.949745576 | -18.26594974 | 7.14779E-60 | 1.06881E-58 | 125.3018082 |
| CCL5        | 2.986109488  | 7.463042203 | 18.25929004  | 7.73605E-60 | 1.1543E-58  | 125.2246901 |
| BHLHE41     | 2.817886606  | 7.416801907 | 18.24192467  | 9.50746E-60 | 1.4156E-58  | 125.0176341 |
| SLC37A2     | 1.803086823  | 4.207915557 | 18.23991013  | 9.73758E-60 | 1.44678E-58 | 124.8841883 |
| CD37        | 1.969203815  | 5.255518087 | 18.22298856  | 1.19037E-59 | 1.76487E-58 | 124.7938023 |
| MARVELD2    | -2.256277672 | 4.168277271 | -18.2175535  | 1.26968E-59 | 1.87848E-58 | 124.7266836 |
| PLA2G7      | 2.207903978  | 4.342905616 | 18.18288307  | 1.9157E-59  | 2.82234E-58 | 124.1636238 |
| SLC16A7     | -2.415267287 | 3.738475469 | -18.16616677 | 2.33572E-59 | 3.42671E-58 | 124.11524   |
| AC009542.2  | 1.566417439  | 3.32397644  | 18.17440787  | 2.11827E-59 | 3.11421E-58 | 123.9819158 |
| HS6ST1      | -1.856105613 | 5.80662252  | -18.13349931 | 3.44032E-59 | 5.02617E-58 | 123.7371933 |
| TAP1        | 1.84101985   | 7.611001292 | 18.12819534  | 3.6635E-59  | 5.32997E-58 | 123.6680137 |
| FABP7       | 4.900099165  | 6.264101997 | 18.13042258  | 3.56807E-59 | 5.20195E-58 | 123.4600899 |
| HEPACAM2    | -3.850010606 | 2.633702842 | -18.06849631 | 7.42978E-59 | 1.07203E-57 | 122.9434138 |
| LINC01587   | 1.836198541  | 3.546623406 | 18.0848244   | 6.12375E-59 | 8.87247E-58 | 122.9219838 |
| SELENBP1    | -1.698648851 | 6.200143964 | -18.0569808  | 8.5148E-59  | 1.22104E-57 | 122.8324087 |
| IKBIP       | 1.73727098   | 6.249395235 | 18.05614935  | 8.59901E-59 | 1.23059E-57 | 122.8250532 |
| FMNL1       | 1.789185772  | 4.782608642 | 18.02909954  | 1.18429E-58 | 1.68792E-57 | 122.4817638 |
| CCDC181     | -1.69765753  | 2.477720072 | -18.02515368 | 1.24088E-58 | 1.76498E-57 | 122.4507316 |
| ESRP1       | -3.121829522 | 2.777346104 | -18.02336559 | 1.26741E-58 | 1.79541E-57 | 122.413133  |
| NIPAL1      | -2.137158599 | 2.797292084 | -17.9795786  | 2.12709E-58 | 2.99504E-57 | 121.9080231 |
| HCLS1       | 1.938077683  | 6.452890746 | 17.97566008  | 2.22793E-58 | 3.13073E-57 | 121.8758332 |
| BTK         | 1.520919707  | 3.999290822 | 17.98186611  | 2.07034E-58 | 2.92102E-57 | 121.8461695 |
| SLC1A4      | 1.665217595  | 5.059358255 | 17.95043805  | 3.00154E-58 | 4.20938E-57 | 121.5793872 |
| CALML3      | -1.698820451 | 2.114142535 | -17.92265629 | 4.16735E-58 | 5.83263E-57 | 121.2342146 |
| HPD         | -4.052064099 | 4.047635826 | -17.92008566 | 4.2958E-58  | 6.0004E-57  | 121.2201409 |
| AC083862.2  | 1.521826148  | 4.416830664 | 17.91216153  | 4.71714E-58 | 6.57581E-57 | 121.0905637 |
| PHKA2       | 2.069163265  | 6.431269936 | 17.89744607  | 5.6121E-58  | 7.80785E-57 | 120.9571091 |
| B4GALNT3    | -2.174851684 | 3.158257685 | -17.8837191  | 6.59914E-58 | 9.16285E-57 | 120.780037  |
| SLC9A3      | -3.797935055 | 4.633264773 | -17.87965711 | 6.92317E-58 | 9.59373E-57 | 120.74299   |



|            |              |             |              |             |             |             |
|------------|--------------|-------------|--------------|-------------|-------------|-------------|
| LILRB2     | 1.675907443  | 4.372216878 | 17.87809837  | 7.05169E-58 | 9.75251E-57 | 120.6626728 |
| RASSF10    | -2.0322542   | 2.715701829 | -17.86144499 | 8.5827E-58  | 1.18232E-56 | 120.5195671 |
| C1QC       | 2.856589656  | 9.435768349 | 17.83641078  | 1.15306E-57 | 1.57908E-56 | 120.2335617 |
| TAPBP      | 1.593627135  | 8.853994363 | 17.82301606  | 1.35032E-57 | 1.84561E-56 | 120.0778007 |
| FAM83B     | -2.245219084 | 2.327445612 | -17.81223599 | 1.53328E-57 | 2.0916E-56  | 119.939033  |
| HSPB7      | -2.769026162 | 3.37785911  | -17.8119085  | 1.53921E-57 | 2.09561E-56 | 119.9349494 |
| ZNF395     | 2.470763495  | 8.158020801 | 17.79377423  | 1.90594E-57 | 2.57984E-56 | 119.7275961 |
| LINC01612  | -2.348027181 | 2.306379744 | -17.78828525 | 2.03327E-57 | 2.74688E-56 | 119.6565766 |
| ITGB2      | 2.394341652  | 6.800736857 | 17.78371164  | 2.14583E-57 | 2.89336E-56 | 119.6191771 |
| GALNT3     | -2.307665643 | 3.560572067 | -17.78106685 | 2.21374E-57 | 2.97919E-56 | 119.5755993 |
| MT1G       | -4.937756559 | 5.938495144 | -17.76574035 | 2.65171E-57 | 3.55492E-56 | 119.3789044 |
| CSTA       | 1.553761395  | 4.061683037 | 17.77095404  | 2.49379E-57 | 3.34962E-56 | 119.3674136 |
| CWH43      | -2.792407096 | 2.672094811 | -17.755254   | 3.00023E-57 | 3.99917E-56 | 119.2600207 |
| PRF1       | 2.382473404  | 5.624518303 | 17.75105409  | 3.15232E-57 | 4.19391E-56 | 119.232383  |
| AC104072.1 | -1.97313664  | 2.116715839 | -17.74990447 | 3.19528E-57 | 4.24299E-56 | 119.2079766 |
| RPS6KA6    | -2.264178755 | 2.983094791 | -17.73718166 | 3.71155E-57 | 4.90991E-56 | 119.0557189 |
| CORO1A     | 2.318479602  | 6.089200296 | 17.71514302  | 4.81054E-57 | 6.32785E-56 | 118.8217123 |
| CTH        | -1.507634633 | 3.835863172 | -17.70674334 | 5.31023E-57 | 6.97204E-56 | 118.7091111 |
| ADAP2      | 1.711051562  | 5.377083732 | 17.69943287  | 5.7871E-57  | 7.56975E-56 | 118.6363928 |
| SLC47A2    | -2.375566295 | 2.77095841  | -17.69986529 | 5.75774E-57 | 7.54544E-56 | 118.6164418 |
| CAV1       | 2.258904941  | 8.340649659 | 17.68503371  | 6.85504E-57 | 8.94992E-56 | 118.453795  |
| C1orf162   | 2.181999188  | 5.877792456 | 17.66481064  | 8.6951E-57  | 1.12474E-55 | 118.2313276 |
| LINC01606  | -1.998540555 | 2.140081474 | -17.66540684 | 8.63437E-57 | 1.11895E-55 | 118.2174921 |
| PTCSC3     | -2.379078233 | 2.551753543 | -17.65992515 | 9.20906E-57 | 1.18902E-55 | 118.1478874 |
| DTX1       | -1.807186776 | 3.432533965 | -17.65719565 | 9.50931E-57 | 1.22553E-55 | 118.1259079 |
| KISS1R     | 2.670565116  | 4.22113874  | 17.6735381   | 7.84719E-57 | 1.02262E-55 | 118.0723027 |
| LCP2       | 1.930781198  | 5.355095844 | 17.6402986   | 1.15981E-56 | 1.48652E-55 | 117.9387542 |
| C1QA       | 2.716149686  | 9.574541249 | 17.63975311  | 1.16727E-56 | 1.49062E-55 | 117.9269452 |
| SIM1       | -2.799299508 | 3.316899599 | -17.64012746 | 1.16215E-56 | 1.48679E-55 | 117.9185659 |
| HIF1A-AS2  | 2.495779016  | 4.60425934  | 17.64543394  | 1.0919E-56  | 1.40461E-55 | 117.8303059 |
| FMO5       | -2.014923801 | 3.614580685 | -17.628043   | 1.33944E-56 | 1.70736E-55 | 117.7826655 |
| AC103563.7 | -2.318350994 | 2.805665155 | -17.62616485 | 1.36932E-56 | 1.74227E-55 | 117.7536748 |
| DEF6       | 1.850869076  | 4.92661438  | 17.57842326  | 2.39863E-56 | 3.04639E-55 | 117.1951471 |
| GZMA       | 2.784594435  | 6.333023122 | 17.57249901  | 2.57133E-56 | 3.24805E-55 | 117.1505072 |
| LDHB       | -1.577102231 | 10.00177283 | -17.57273406 | 2.56425E-56 | 3.24496E-55 | 117.1060687 |
| ANGPT2     | 2.839187974  | 6.31896747  | 17.56140508  | 2.92884E-56 | 3.69297E-55 | 117.0198789 |
| RNU6-796P  | 1.989082962  | 3.884076346 | 17.57460195  | 2.50865E-56 | 3.18035E-55 | 116.9609119 |
| SOSTDC1    | -3.396034193 | 3.387355704 | -17.55357051 | 3.21081E-56 | 4.03398E-55 | 116.9095364 |
| FERMT3     | 1.954517942  | 5.761690301 | 17.54031094  | 3.75114E-56 | 4.69527E-55 | 116.774321  |
| COL4A5     | -2.072373212 | 3.511392128 | -17.53523536 | 3.98121E-56 | 4.96622E-55 | 116.6958562 |
| CGN        | -2.499709314 | 4.225529596 | -17.52463796 | 4.508E-56   | 5.61334E-55 | 116.5794626 |
| VAV1       | 1.689138595  | 4.359744761 | 17.5206155   | 4.7257E-56  | 5.87397E-55 | 116.4670305 |
| FOXC1      | -2.077329451 | 5.139487457 | -17.5049425  | 5.67882E-56 | 7.03369E-55 | 116.3521507 |
| MAP6       | -1.6901984   | 3.01786413  | -17.50149167 | 5.91321E-56 | 7.31107E-55 | 116.3061413 |
| TMC8       | 1.741782333  | 4.373279452 | 17.50531597  | 5.65401E-56 | 7.01539E-55 | 116.2832524 |
| KCNQ1      | -1.947818609 | 5.400998021 | -17.49566521 | 6.33108E-56 | 7.81392E-55 | 116.2438681 |
| HSPA7      | 2.162659163  | 4.22012282  | 17.48520323  | 7.15679E-56 | 8.81746E-55 | 115.9482273 |
| GPAT3      | -2.801742516 | 4.95467452  | -17.4695658  | 8.59559E-56 | 1.05715E-54 | 115.9401509 |
| ARRDC2     | 1.922296172  | 6.663883527 | 17.45823881  | 9.81497E-56 | 1.20289E-54 | 115.8039462 |
| LAD1       | -3.278473543 | 4.376503422 | -17.45689825 | 9.97026E-56 | 1.21979E-54 | 115.7931117 |
| TMPRSS4    | -2.211725815 | 2.303533132 | -17.44808756 | 1.10538E-55 | 1.34999E-54 | 115.6750741 |
| RAP1GAP    | -2.729215948 | 5.663318399 | -17.44242009 | 1.18121E-55 | 1.44009E-54 | 115.6169961 |
| PAQR7      | -1.526210337 | 5.916179069 | -17.42933834 | 1.37667E-55 | 1.67547E-54 | 115.4693431 |
| CYFIP2     | -2.139267896 | 7.002849594 | -17.41759041 | 1.57957E-55 | 1.91574E-54 | 115.3185874 |
| MLKL       | 1.557707419  | 4.808646109 | 17.39145754  | 2.14442E-55 | 2.57846E-54 | 115.02146   |
| LINC01871  | 1.506301818  | 3.837708568 | 17.39602246  | 2.03293E-55 | 2.44861E-54 | 114.9461236 |
| AL109615.3 | 1.94824537   | 4.55452052  | 17.38872472  | 2.21407E-55 | 2.65764E-54 | 114.9190742 |
| PLXDC1     | 2.067317575  | 4.864180389 | 17.35367106  | 3.33557E-55 | 3.98333E-54 | 114.5418142 |

|            |              |             |              |             |             |             |
|------------|--------------|-------------|--------------|-------------|-------------|-------------|
| AC008760.2 | 2.422731481  | 4.227214415 | 17.36098096  | 3.06243E-55 | 3.66339E-54 | 114.4484231 |
| AL162724.2 | 1.521434281  | 3.526712422 | 17.34205694  | 3.82044E-55 | 4.55458E-54 | 114.2542349 |
| ALDH6A1    | -2.636847938 | 6.035048703 | -17.318812   | 5.01236E-55 | 5.95527E-54 | 114.1729224 |
| FAM169A    | -1.921190173 | 2.3787511   | -17.31829278 | 5.04285E-55 | 5.98133E-54 | 114.1652106 |
| FRMD7      | -1.560926861 | 2.03488576  | -17.30478646 | 5.90436E-55 | 6.95602E-54 | 113.9905554 |
| YBX3       | 1.506336081  | 7.618212094 | 17.30123093  | 6.15463E-55 | 7.23867E-54 | 113.9716128 |
| LINC02038  | -1.787082883 | 2.443683661 | -17.29849689 | 6.35425E-55 | 7.46091E-54 | 113.9359222 |
| NUSAP1     | 1.916549716  | 5.292943117 | 17.272128    | 8.6442E-55  | 1.01327E-53 | 113.6398064 |
| LGALS1     | 2.073583242  | 10.17827701 | 17.25702025  | 1.03103E-54 | 1.20655E-53 | 113.4514958 |
| ALB        | -3.419110426 | 3.343991845 | -17.25061327 | 1.11104E-54 | 1.298E-53   | 113.3757563 |
| LINC02381  | -2.2403621   | 5.493418628 | -17.24775042 | 1.14876E-54 | 1.33984E-53 | 113.354732  |
| BMP7       | -2.353251402 | 2.347721421 | -17.24139479 | 1.23714E-54 | 1.43813E-53 | 113.2654775 |
| LSP1       | 2.112874285  | 5.63139338  | 17.1987539   | 2.03368E-54 | 2.3446E-53  | 112.792194  |
| ST6GAL1    | -2.189392668 | 6.480669688 | -17.18826609 | 2.29799E-54 | 2.64061E-53 | 112.6547407 |
| PFKFB4     | 1.883681184  | 4.812085801 | 17.1893041   | 2.27037E-54 | 2.61316E-53 | 112.6430422 |
| CA8        | -2.015285086 | 2.730689145 | -17.18047777 | 2.51621E-54 | 2.8819E-53  | 112.5620589 |
| PFKFB2     | -1.920864912 | 3.983884162 | -17.1707041  | 2.81955E-54 | 3.2188E-53  | 112.4525944 |
| ABAT       | -2.236519318 | 4.328733975 | -17.16948814 | 2.85976E-54 | 3.25938E-53 | 112.442199  |
| BIN2       | 1.576138154  | 4.704697785 | 17.14801687  | 3.6719E-54  | 4.17142E-53 | 112.1821934 |
| TBXAS1     | 1.523334596  | 4.91292693  | 17.13755474  | 4.14736E-54 | 4.70393E-53 | 112.0761522 |
| SFXN2      | -1.677092033 | 4.035009185 | -17.13171297 | 4.43909E-54 | 5.02666E-53 | 112.0007312 |
| RHBG       | -2.922058004 | 2.495729396 | -17.12464309 | 4.81968E-54 | 5.44881E-53 | 111.9001129 |
| LPCAT1     | 2.306696931  | 7.602960092 | 17.10776811  | 5.86499E-54 | 6.60921E-53 | 111.7218075 |
| RNASET2    | 2.848139305  | 6.938184804 | 17.10625849  | 5.96887E-54 | 6.70468E-53 | 111.7189271 |
| MPC1       | -1.63969813  | 7.512773604 | -17.10710764 | 5.91021E-54 | 6.64946E-53 | 111.7079698 |
| SNHG12     | 1.915368306  | 4.521423872 | 17.10413828  | 6.11787E-54 | 6.86104E-53 | 111.6129325 |
| OXGR1      | -2.101061764 | 2.29503894  | -17.09370063 | 6.90734E-54 | 7.73401E-53 | 111.5551307 |
| ARHGDIB    | 1.686699705  | 9.424605206 | 17.08943676  | 7.25838E-54 | 8.11408E-53 | 111.5119142 |
| PRDM1      | 1.912046113  | 5.095177375 | 17.07917273  | 8.1782E-54  | 9.12776E-53 | 111.3901305 |
| KRBA1      | 2.313137557  | 5.908818694 | 17.05694048  | 1.05891E-53 | 1.1781E-52  | 111.1496736 |
| GRIK5      | -2.34034239  | 2.625844683 | -17.05886619 | 1.03548E-53 | 1.15387E-52 | 111.1462645 |
| S100A14    | -2.2890648   | 4.188667907 | -17.05016079 | 1.14568E-53 | 1.26859E-52 | 111.0581032 |
| PPM1H      | -1.996974605 | 4.199425983 | -17.04398956 | 1.23083E-53 | 1.36026E-52 | 110.9852275 |
| LTB4R      | 1.573210571  | 4.132617497 | 17.05058459  | 1.14006E-53 | 1.26436E-52 | 110.9763086 |
| AC148477.4 | -2.859262862 | 2.587847569 | -17.04296963 | 1.24549E-53 | 1.37259E-52 | 110.9541378 |
| NLRC5      | 1.685750398  | 4.761535461 | 17.0335037   | 1.39022E-53 | 1.52968E-52 | 110.8519344 |
| AC130371.2 | -1.938222665 | 3.049662804 | -17.01870815 | 1.65079E-53 | 1.80503E-52 | 110.6885754 |
| PHYHD1     | -2.527657224 | 4.176277797 | -17.0147225  | 1.72896E-53 | 1.88756E-52 | 110.6494676 |
| COL4A4     | -2.081427309 | 4.348702698 | -16.9903031  | 2.2954E-53  | 2.49042E-52 | 110.3655624 |
| CAVIN3     | 2.108634064  | 7.192097253 | 16.96388102  | 3.11856E-53 | 3.37305E-52 | 110.057928  |
| CLDN14     | -1.775171252 | 2.730895678 | -16.95596133 | 3.41848E-53 | 3.68606E-52 | 109.9660012 |
| AC108463.1 | 1.737669678  | 4.420233861 | 16.95844637  | 3.3214E-53  | 3.5869E-52  | 109.9309086 |
| GAS1       | -1.943462643 | 3.576263702 | -16.94911703 | 3.70077E-53 | 3.97819E-52 | 109.8849945 |
| AL590666.2 | 1.83011858   | 4.233623303 | 16.95567054  | 3.43003E-53 | 3.69282E-52 | 109.8498777 |
| CLIC5      | -2.722031653 | 3.829215378 | -16.93659053 | 4.27905E-53 | 4.58572E-52 | 109.7432695 |
| HOXB6      | -2.009035574 | 4.785580956 | -16.93101227 | 4.56479E-53 | 4.88447E-52 | 109.6828451 |
| SCN1B      | 1.587005856  | 4.663862557 | 16.91937493  | 5.2237E-53  | 5.57247E-52 | 109.5326258 |
| MS4A6A     | 2.295456016  | 6.140609877 | 16.90586166  | 6.1088E-53  | 6.49687E-52 | 109.404018  |
| ASF1B      | 1.542347909  | 4.223059431 | 16.91129685  | 5.7361E-53  | 6.10978E-52 | 109.3825508 |
| PAPPA2     | -2.717224761 | 2.65646262  | -16.90037789 | 6.50933E-53 | 6.90187E-52 | 109.3077874 |
| CLEC2B     | 1.843077269  | 5.248707112 | 16.88883454  | 7.44017E-53 | 7.8769E-52  | 109.2008066 |
| HMOX1      | 2.721256477  | 9.104118639 | 16.86773189  | 9.49865E-53 | 9.99572E-52 | 108.9506273 |
| TYMS       | 2.012391521  | 6.034916037 | 16.86620696  | 9.66775E-53 | 1.01584E-51 | 108.9451913 |
| APOBEC3G   | 1.799995093  | 4.922991407 | 16.86282742  | 1.00533E-52 | 1.05319E-51 | 108.884532  |
| SLC13A3    | -3.850086544 | 3.427350556 | -16.85800549 | 1.06301E-52 | 1.11029E-51 | 108.8344651 |
| CD52       | 2.279547026  | 6.866399697 | 16.85614604  | 1.08613E-52 | 1.13275E-51 | 108.8203695 |
| GZMB       | 1.839513609  | 4.497869055 | 16.85830429  | 1.05934E-52 | 1.10812E-51 | 108.7782477 |
| CST7       | 2.69752295   | 6.09729475  | 16.84463866  | 1.24077E-52 | 1.28446E-51 | 108.6944983 |

|            |              |             |              |             |             |             |
|------------|--------------|-------------|--------------|-------------|-------------|-------------|
| CDH16      | -2.694287295 | 8.645711531 | -16.84777343 | 1.19659E-52 | 1.24239E-51 | 108.6899795 |
| C1QTNF6    | 1.540491885  | 4.309426109 | 16.84599922  | 1.2214E-52  | 1.26628E-51 | 108.6461479 |
| BMPR1B     | -2.802793992 | 2.768693053 | -16.83754235 | 1.3469E-52  | 1.39226E-51 | 108.582965  |
| AL109615.1 | 2.693279792  | 4.223754858 | 16.85077429  | 1.15577E-52 | 1.20358E-51 | 108.4967162 |
| IYD        | -1.985311467 | 2.440477512 | -16.81920749 | 1.66496E-52 | 1.71344E-51 | 108.3845164 |
| MS4A7      | 2.329130787  | 6.168709551 | 16.8117268   | 1.81533E-52 | 1.85999E-51 | 108.318749  |
| RAB42      | 3.010912124  | 5.338117277 | 16.81526631  | 1.74256E-52 | 1.78804E-51 | 108.2439991 |
| HCK        | 1.916351712  | 5.493151903 | 16.79799073  | 2.12763E-52 | 2.1736E-51  | 108.158551  |
| ACOT11     | -1.623980526 | 3.355645174 | -16.79476446 | 2.20844E-52 | 2.25287E-51 | 108.1091728 |
| LRRN2      | -2.372181131 | 3.186513337 | -16.78958768 | 2.34455E-52 | 2.38824E-51 | 108.0387151 |
| TAGLN3     | -1.930789757 | 2.277000077 | -16.78560658 | 2.4549E-52  | 2.497E-51   | 107.9972697 |
| LINC01428  | 1.916908999  | 3.782244934 | 16.80252051  | 2.01913E-52 | 2.06577E-51 | 107.9805122 |
| ILDR1      | -2.036893514 | 4.305701174 | -16.7763581  | 2.73166E-52 | 2.77046E-51 | 107.8969148 |
| AC107021.2 | 1.536643436  | 3.81949453  | 16.78027964  | 2.61069E-52 | 2.65162E-51 | 107.7970776 |
| HLX        | 1.787706128  | 4.550756218 | 16.76583211  | 3.08472E-52 | 3.11949E-51 | 107.7273171 |
| WAS        | 1.919057642  | 5.368067528 | 16.74050926  | 4.13206E-52 | 4.13678E-51 | 107.494071  |
| MYBL2      | 1.658979022  | 3.700129047 | 16.75646917  | 3.43687E-52 | 3.4656E-51  | 107.4751156 |
| AC015910.1 | -3.634977832 | 2.73103661  | -16.7408642  | 4.11516E-52 | 4.12578E-51 | 107.4665612 |
| THRB       | -1.744789777 | 3.818994441 | -16.73437011 | 4.4354E-52  | 4.4215E-51  | 107.4117205 |
| MPPED2     | -1.787999822 | 2.854269311 | -16.73323697 | 4.49377E-52 | 4.47332E-51 | 107.3984496 |
| PLK2       | 2.107425703  | 6.962753116 | 16.73225089  | 4.54519E-52 | 4.51808E-51 | 107.3901743 |
| APBB1IP    | 2.453483113  | 6.147963973 | 16.71759902  | 5.3822E-52  | 5.33494E-51 | 107.2359538 |
| P2RY1      | 1.568693268  | 3.932327865 | 16.71084314  | 5.81835E-52 | 5.75097E-51 | 107.0185555 |
| CD7        | 1.682416557  | 4.045903099 | 16.69307303  | 7.14144E-52 | 7.00923E-51 | 106.8174833 |
| PPP1R18    | 1.648142171  | 6.721344308 | 16.6693993   | 9.38168E-52 | 9.19509E-51 | 106.6660006 |
| CARD16     | 1.600624089  | 5.137146846 | 16.66631466  | 9.7211E-52  | 9.51444E-51 | 106.6431947 |
| KDF1       | -2.082697242 | 3.973668101 | -16.66573811 | 9.78589E-52 | 9.56448E-51 | 106.6231066 |
| AL049555.1 | -2.30516307  | 2.437592868 | -16.66145352 | 1.02811E-51 | 1.00344E-50 | 106.5655174 |
| SH3GL2     | -2.942158143 | 2.802402717 | -16.65304139 | 1.13271E-51 | 1.104E-50   | 106.4598148 |
| C7         | -4.300928578 | 6.108292324 | -16.65280011 | 1.13587E-51 | 1.10554E-50 | 106.4562253 |
| BTN3A2     | 1.828000953  | 6.581675105 | 16.62937657  | 1.48753E-51 | 1.43781E-50 | 106.2103106 |
| THEMIS2    | 1.942331864  | 5.529492634 | 16.62814889  | 1.5087E-51  | 1.45626E-50 | 106.2069142 |
| LGI2       | -1.972470378 | 3.059004587 | -16.61579664 | 1.73919E-51 | 1.67643E-50 | 106.0461123 |
| GABARAPL1  | -1.73678547  | 7.529538838 | -16.61224159 | 1.81182E-51 | 1.74403E-50 | 106.0008508 |
| DNAH11     | 1.946191685  | 3.688975704 | 16.63064839  | 1.46591E-51 | 1.41887E-50 | 105.980683  |
| C1orf116   | -2.701599372 | 2.933451864 | -16.60942301 | 1.87155E-51 | 1.79905E-50 | 105.9626524 |
| PLEKHO1    | 1.611591996  | 5.509760644 | 16.60558236  | 1.95611E-51 | 1.87776E-50 | 105.9496437 |
| GBP2       | 1.870793946  | 6.944157583 | 16.60083332  | 2.06596E-51 | 1.97508E-50 | 105.8792886 |
| HOMER1     | -1.642888913 | 3.362484408 | -16.5958363  | 2.1882E-51  | 2.08058E-50 | 105.823293  |
| CTSW       | 2.354854255  | 5.224485826 | 16.58009826  | 2.62239E-51 | 2.48665E-50 | 105.6170899 |
| PLPP4      | -2.185178454 | 2.728929573 | -16.57823321 | 2.67924E-51 | 2.53712E-50 | 105.6123013 |
| PP7080     | -2.329151214 | 5.838872575 | -16.56858543 | 2.99354E-51 | 2.82328E-50 | 105.5128063 |
| EDA2R      | 1.847072076  | 4.947483307 | 16.56681352  | 3.05514E-51 | 2.87751E-50 | 105.4798637 |
| JAK3       | 1.792484042  | 4.692367453 | 16.52922112  | 4.70577E-51 | 4.39666E-50 | 105.0282549 |
| PTP4A3     | 1.756517753  | 6.733389314 | 16.50486591  | 6.22423E-51 | 5.79218E-50 | 104.7813017 |
| CD2        | 2.665000699  | 5.849848887 | 16.48233998  | 8.06043E-51 | 7.48102E-50 | 104.5264889 |
| OLFML2B    | 2.49268755   | 6.456450274 | 16.46773769  | 9.53031E-51 | 8.83353E-50 | 104.371186  |
| LDHA       | 1.761308678  | 10.57579991 | 16.44979661  | 1.17073E-50 | 1.07942E-49 | 104.137561  |
| TRIM9      | 1.51029064   | 3.654456653 | 16.45900631  | 1.05341E-50 | 9.75096E-50 | 104.0840149 |
| SLC36A2    | -2.991612503 | 2.556652411 | -16.44077181 | 1.29834E-50 | 1.19549E-49 | 104.0267676 |
| HNF4A-AS1  | -1.624210122 | 2.23541805  | -16.43524196 | 1.38329E-50 | 1.27038E-49 | 103.9760718 |
| PROZ       | -1.864739124 | 2.321230582 | -16.4300957  | 1.46733E-50 | 1.34579E-49 | 103.9215688 |
| COL9A2     | -2.008612318 | 3.612121875 | -16.41072831 | 1.83186E-50 | 1.67355E-49 | 103.701796  |
| PPP1R1A    | -3.97647502  | 4.267559999 | -16.40348369 | 1.99035E-50 | 1.80889E-49 | 103.6281269 |
| SLC5A2     | -2.339774009 | 2.526504183 | -16.4041653  | 1.97487E-50 | 1.79716E-49 | 103.6195601 |
| AP000439.2 | 3.127918919  | 4.733148449 | 16.41888255  | 1.6685E-50  | 1.52629E-49 | 103.551723  |
| CGREF1     | 2.414875649  | 5.094254638 | 16.39777377  | 2.12484E-50 | 1.92612E-49 | 103.5113402 |
| ZFAS1      | 1.545962464  | 7.879455304 | 16.39054786  | 2.30812E-50 | 2.08685E-49 | 103.4773274 |

|            |              |             |              |             |             |             |
|------------|--------------|-------------|--------------|-------------|-------------|-------------|
| FAM171A1   | -2.073866546 | 5.824197528 | -16.38024021 | 2.5972E-50  | 2.3409E-49  | 103.3620921 |
| HSPB8      | 2.345958786  | 8.654275586 | 16.38017487  | 2.59914E-50 | 2.3409E-49  | 103.358292  |
| CXCR3      | 1.795853613  | 4.000881588 | 16.39095617  | 2.29736E-50 | 2.07981E-49 | 103.3275081 |
| ITGAL      | 2.069104201  | 5.10769402  | 16.36639709  | 3.04304E-50 | 2.72666E-49 | 103.1874401 |
| PDLIM1     | 1.722769674  | 8.884657802 | 16.36115504  | 3.23114E-50 | 2.8915E-49  | 103.1448634 |
| CBLC       | -1.922375587 | 3.112984743 | -16.34378278 | 3.94146E-50 | 3.51368E-49 | 102.9387815 |
| CYP4F2     | -2.587557899 | 2.51557085  | -16.34468255 | 3.90111E-50 | 3.48659E-49 | 102.9369879 |
| EBI3       | 1.775445481  | 4.678591009 | 16.3445047   | 3.90906E-50 | 3.48923E-49 | 102.92055   |
| TMEM72     | -3.374787188 | 5.377890607 | -16.33659147 | 4.27929E-50 | 3.80515E-49 | 102.8581429 |
| PTTG1      | 1.588684975  | 4.299005631 | 16.34010169  | 4.11093E-50 | 3.66009E-49 | 102.8354768 |
| TMCC1      | 1.660377355  | 6.233117583 | 16.32247793  | 5.0286E-50  | 4.46009E-49 | 102.7052535 |
| ADH1B      | -3.106546864 | 3.921522009 | -16.32065285 | 5.1346E-50  | 4.54835E-49 | 102.682051  |
| RNU6-339P  | 2.100332479  | 4.11575135  | 16.32878632  | 4.67873E-50 | 4.15505E-49 | 102.5884086 |
| DGKD       | 1.71189154   | 4.935661822 | 16.30745397  | 5.97057E-50 | 5.26886E-49 | 102.5269164 |
| RASD1      | -2.785152071 | 6.8420189   | -16.30397555 | 6.21265E-50 | 5.47558E-49 | 102.4751449 |
| PTP4A2P2   | 1.608606016  | 3.729466648 | 16.31047131  | 5.76822E-50 | 5.10316E-49 | 102.3887495 |
| LHX1       | -2.259493537 | 2.332784295 | -16.29492256 | 6.88959E-50 | 6.04936E-49 | 102.3767667 |
| ETV7       | 1.816677554  | 4.482606868 | 16.29205748  | 7.1188E-50  | 6.23496E-49 | 102.2867133 |
| GGTA1P     | 1.707823161  | 4.904764899 | 16.28087713  | 8.08837E-50 | 7.06647E-49 | 102.2229279 |
| STRA8      | 1.797362894  | 3.866654153 | 16.29392814  | 6.9683E-50  | 6.1108E-49  | 102.1930907 |
| MISP3      | -1.58181114  | 4.321872559 | -16.27148926 | 9.00354E-50 | 7.84642E-49 | 102.1180515 |
| OR51E1     | 1.590489573  | 3.879452731 | 16.28183109  | 8.00073E-50 | 6.99864E-49 | 102.1013099 |
| DEPP1      | 2.330619119  | 9.199496397 | 16.2619638   | 1.00378E-49 | 8.73685E-49 | 102.0149184 |
| NR3C2      | -2.052870786 | 4.355757996 | -16.26176403 | 1.00607E-49 | 8.74591E-49 | 102.0095168 |
| NCF4       | 1.741394027  | 5.225394917 | 16.25582465  | 1.07663E-49 | 9.34772E-49 | 101.9518449 |
| AC087468.1 | 1.64665453   | 3.435050464 | 16.27505867  | 8.64399E-50 | 7.54248E-49 | 101.9184179 |
| CYTH4      | 1.603535334  | 4.669462019 | 16.25487385  | 1.08838E-49 | 9.43799E-49 | 101.9163472 |
| NTNG1      | -1.528071954 | 2.116348634 | -16.22911534 | 1.46017E-49 | 1.25996E-48 | 101.618519  |
| MIR200CHG  | -2.132857449 | 2.30073932  | -16.20389526 | 1.94664E-49 | 1.66943E-48 | 101.3442004 |
| UBE2C      | 1.991353187  | 4.512686979 | 16.20814031  | 1.85468E-49 | 1.59253E-48 | 101.306787  |
| FABP1      | -3.06728514  | 2.960260705 | -16.19957563 | 2.04487E-49 | 1.74939E-48 | 101.2842807 |
| NPM1P25    | -1.552930362 | 3.896408096 | -16.19711879 | 2.10294E-49 | 1.79687E-48 | 101.273655  |
| LOXL2      | 2.628253828  | 6.492710445 | 16.1587708   | 3.25486E-49 | 2.77099E-48 | 100.8543465 |
| AC005082.1 | -2.49381864  | 2.906699094 | -16.16066278 | 3.1855E-49  | 2.71524E-48 | 100.8459354 |
| EPB41L5    | -1.667589567 | 4.785821002 | -16.1562854  | 3.34828E-49 | 2.84705E-48 | 100.8115133 |
| B4GALNT2   | -2.318973418 | 2.616244407 | -16.15540323 | 3.38208E-49 | 2.8723E-48  | 100.7889062 |
| TRBV28     | 2.317777088  | 5.102991028 | 16.14922895  | 3.62834E-49 | 3.07771E-48 | 100.6936259 |
| MIR210     | 2.014198654  | 4.043640071 | 16.14906712  | 3.63503E-49 | 3.07965E-48 | 100.5407773 |
| DPEP1      | -3.647395    | 4.226463949 | -16.11962117 | 5.08184E-49 | 4.259E-48   | 100.4022255 |
| FCGR2C     | 1.510809982  | 3.433050556 | 16.13839755  | 4.10436E-49 | 3.47308E-48 | 100.3835545 |
| CAPN12     | 2.085478421  | 4.53922424  | 16.11718779  | 5.22445E-49 | 4.37329E-48 | 100.2742753 |
| ZNF37CP    | 1.87042154   | 3.722498407 | 16.12729723  | 4.65691E-49 | 3.92167E-48 | 100.2535665 |
| AC019197.1 | -1.723776011 | 2.454386896 | -16.10634713 | 5.90993E-49 | 4.93528E-48 | 100.2412091 |
| VWF        | 3.036620133  | 8.785978274 | 16.09978492  | 6.36774E-49 | 5.31126E-48 | 100.167072  |
| HOXD8      | -1.760927532 | 6.414118811 | -16.09212698 | 6.94693E-49 | 5.78745E-48 | 100.0849929 |
| EMP3       | 1.637720385  | 7.666751451 | 16.08520511  | 7.51553E-49 | 6.25371E-48 | 100.0048143 |
| AC104794.4 | -1.91326884  | 3.709450483 | -16.08148062 | 7.84046E-49 | 6.51634E-48 | 99.95986556 |
| MSC        | 2.644847535  | 6.132004573 | 16.07993337  | 7.97954E-49 | 6.62406E-48 | 99.9593195  |
| GLDC       | -2.400790172 | 4.499201451 | -16.07574889 | 8.3681E-49  | 6.93839E-48 | 99.9027091  |
| STAP1      | -2.955660852 | 3.064548635 | -16.06412035 | 9.54992E-49 | 7.89957E-48 | 99.75098142 |
| FXYD5      | 1.773455175  | 7.234697865 | 16.06018292  | 9.98671E-49 | 8.25112E-48 | 99.71935059 |
| MAL2       | -3.142193928 | 6.181189935 | -16.02582726 | 1.47507E-48 | 1.21299E-47 | 99.32276705 |
| POU5F1     | 2.583917811  | 5.5817653   | 16.00141228  | 1.94581E-48 | 1.59634E-47 | 99.04696154 |
| PLA2R1     | -1.94327973  | 3.672272426 | -15.97245723 | 2.70185E-48 | 2.20883E-47 | 98.72695546 |
| SLC30A2    | -2.553537868 | 2.860809202 | -15.95653763 | 3.23591E-48 | 2.63927E-47 | 98.53560465 |
| TMC4       | -2.735985671 | 4.933657763 | -15.9544778  | 3.31231E-48 | 2.69843E-47 | 98.53488631 |
| PALD1      | 1.738168599  | 5.494108791 | 15.94581696  | 3.6537E-48  | 2.97309E-47 | 98.44512375 |
| LYPD6B     | -2.229753822 | 2.367547691 | -15.9360074  | 4.08294E-48 | 3.31467E-47 | 98.31027908 |

|            |              |             |              |             |             |             |
|------------|--------------|-------------|--------------|-------------|-------------|-------------|
| CASP1      | 1.620096948  | 5.582564594 | 15.92961078  | 4.38959E-48 | 3.55536E-47 | 98.26199281 |
| AC144831.1 | -1.703646979 | 2.838291088 | -15.91317264 | 5.28716E-48 | 4.27246E-47 | 98.06119676 |
| ARHGAP25   | 1.53472329   | 5.208907946 | 15.8893475   | 6.9226E-48  | 5.55554E-47 | 97.80779154 |
| MCF2L-AS1  | -1.721035949 | 2.617362329 | -15.88817594 | 7.01492E-48 | 5.61675E-47 | 97.77849643 |
| MUC3A      | 1.515109942  | 3.517092996 | 15.90460193  | 5.82554E-48 | 4.69127E-47 | 97.753546   |
| THSD4      | -1.718813534 | 3.545527342 | -15.87207471 | 8.41552E-48 | 6.70749E-47 | 97.59737332 |
| NUDT4      | -1.582945149 | 5.039285019 | -15.87055593 | 8.56124E-48 | 6.81587E-47 | 97.58321282 |
| PADI2      | -2.106609938 | 4.167407756 | -15.86939146 | 8.67466E-48 | 6.89833E-47 | 97.56811614 |
| CSPG4      | 2.48780046   | 6.434910035 | 15.85284393  | 1.04583E-47 | 8.28849E-47 | 97.39706636 |
| AC073218.2 | 2.014681396  | 3.715714118 | 15.85529129  | 1.01731E-47 | 8.08075E-47 | 97.1572124  |
| TRIB3      | 2.495011075  | 6.074309493 | 15.82155052  | 1.48917E-47 | 1.17488E-46 | 97.04516497 |
| CORO2B     | -1.879856137 | 3.477447957 | -15.78803022 | 2.17374E-47 | 1.70536E-46 | 96.64993969 |
| GJC1       | 1.945372134  | 4.702250305 | 15.79074352  | 2.10823E-47 | 1.65582E-46 | 96.6305557  |
| DACH1      | -1.923793248 | 3.578988035 | -15.78262331 | 2.31042E-47 | 1.80652E-46 | 96.58881    |
| EHD2       | 2.276745464  | 8.761879018 | 15.77133103  | 2.62414E-47 | 2.04269E-46 | 96.46810835 |
| AC018553.1 | 1.857914854  | 4.401516018 | 15.77323579  | 2.56839E-47 | 2.00598E-46 | 96.39415809 |
| HAPLN1     | 1.781308412  | 3.771022304 | 15.78321957  | 2.29494E-47 | 1.79642E-46 | 96.38630719 |
| CGNL1      | -2.396457693 | 6.188724345 | -15.75747553 | 3.06771E-47 | 2.37476E-46 | 96.30745143 |
| FKBP10     | 2.544611245  | 7.6706195   | 15.74967958  | 3.34939E-47 | 2.58664E-46 | 96.22015895 |
| SLFN13     | 1.707563572  | 4.849698079 | 15.74959693  | 3.35251E-47 | 2.58664E-46 | 96.21319136 |
| AC023024.2 | 1.893873153  | 4.121002138 | 15.7619018   | 2.91843E-47 | 2.2617E-46  | 96.2075658  |
| HOXB8      | -2.462713136 | 4.464901913 | -15.73325019 | 4.03035E-47 | 3.0892E-46  | 96.0431255  |
| HAPLN3     | 1.565188702  | 4.148655464 | 15.73661852  | 3.88031E-47 | 2.98073E-46 | 95.98808514 |
| CMTM4      | -1.999021657 | 5.672276998 | -15.72489898 | 4.42778E-47 | 3.3864E-46  | 95.95023558 |
| EYA4       | -1.652162379 | 2.472522869 | -15.72160349 | 4.59516E-47 | 3.50293E-46 | 95.90448535 |
| BTG2       | -1.848662228 | 8.230550458 | -15.70731509 | 5.397E-47   | 4.0919E-46  | 95.72739176 |
| TPX2       | 1.738855634  | 4.43917037  | 15.71138351  | 5.15544E-47 | 3.91724E-46 | 95.72510696 |
| CES4A      | 2.447687649  | 4.748755033 | 15.70784245  | 5.36507E-47 | 4.0721E-46  | 95.63251778 |
| SHISA3     | -3.124007734 | 4.590138357 | -15.69022868 | 6.54107E-47 | 4.95394E-46 | 95.56408074 |
| MAB21L4    | -2.244681922 | 2.52983596  | -15.67463122 | 7.79536E-47 | 5.89113E-46 | 95.37114149 |
| SIGLEC1    | 1.696475032  | 4.15065428  | 15.66413249  | 8.77202E-47 | 6.60782E-46 | 95.15666663 |
| DEGS2      | -1.899112919 | 3.140146343 | -15.6408243  | 1.13988E-46 | 8.5497E-46  | 94.99844621 |
| DNASE1L3   | -2.146394596 | 4.10229592  | -15.63308415 | 1.24342E-46 | 9.3064E-46  | 94.91547421 |
| RASSF4     | 1.758486349  | 6.782733576 | 15.63127896  | 1.26889E-46 | 9.48688E-46 | 94.8953558  |
| CCDC160    | -1.861502804 | 3.292384    | -15.62899757 | 1.30183E-46 | 9.72271E-46 | 94.86674978 |
| SDHAP3     | 2.163617916  | 6.105454103 | 15.62313453  | 1.39043E-46 | 1.03734E-45 | 94.81999127 |
| RNA5SP18   | 1.538816075  | 3.381033533 | 15.63356113  | 1.23678E-46 | 9.26659E-46 | 94.67639031 |
| C4orf47    | 1.820426886  | 4.793688154 | 15.6136296   | 1.54702E-46 | 1.15171E-45 | 94.67566419 |
| GPD1L      | -1.743583453 | 5.397131829 | -15.60467018 | 1.71069E-46 | 1.26682E-45 | 94.60353566 |
| ASPHD1     | 2.051150705  | 4.760741253 | 15.60490085  | 1.70627E-46 | 1.26488E-45 | 94.54814108 |
| NCKAP1L    | 1.877871444  | 4.793743506 | 15.5949037   | 1.90884E-46 | 1.41057E-45 | 94.45960104 |
| RNF43      | -1.724230559 | 3.012134385 | -15.59100375 | 1.99422E-46 | 1.47211E-45 | 94.44422019 |
| SLC29A2    | -1.874558364 | 3.760376402 | -15.58818019 | 2.05841E-46 | 1.51629E-45 | 94.41122635 |
| CD86       | 1.831986239  | 4.848449801 | 15.58056146  | 2.24206E-46 | 1.6481E-45  | 94.30998055 |
| SYNE4      | -1.680494121 | 2.670838818 | -15.57339236 | 2.42977E-46 | 1.77861E-45 | 94.24821122 |
| SLC1A3     | 1.845079228  | 4.329560191 | 15.56304866  | 2.72856E-46 | 1.99316E-45 | 94.03169172 |
| PRSS22     | -1.854247149 | 2.270075885 | -15.55274885 | 3.06248E-46 | 2.23475E-45 | 94.01193108 |
| ITGA5      | 1.949269518  | 7.171368983 | 15.53954069  | 3.551E-46   | 2.58047E-45 | 93.86868821 |
| KCCAT198   | 1.662239047  | 3.77945521  | 15.55060152  | 3.13708E-46 | 2.2868E-45  | 93.81451436 |
| NEK6       | 2.226094606  | 7.234442798 | 15.53431291  | 3.76518E-46 | 2.72761E-45 | 93.81174294 |
| CALCA      | -2.525955392 | 2.272477561 | -15.53174498 | 3.87506E-46 | 2.80431E-45 | 93.77062197 |
| HPCAL4     | -1.717240289 | 2.273922394 | -15.52741731 | 4.06752E-46 | 2.93751E-45 | 93.72833127 |
| CD84       | 1.850536241  | 4.275032739 | 15.53436105  | 3.76315E-46 | 2.72761E-45 | 93.69860374 |
| CD48       | 1.948479186  | 5.235760112 | 15.51155039  | 4.85836E-46 | 3.49422E-45 | 93.56244855 |
| DEPTOR     | -1.552415689 | 6.267251514 | -15.49675132 | 5.73358E-46 | 4.11524E-45 | 93.39816879 |
| CD3D       | 2.450438673  | 5.539430267 | 15.49662312  | 5.74181E-46 | 4.11692E-45 | 93.3872146  |
| NAP1L2     | -2.241733817 | 3.682961747 | -15.4934601  | 5.94867E-46 | 4.25652E-45 | 93.35242724 |
| SLAMF6     | 1.743571688  | 4.22734538  | 15.47407298  | 7.38933E-46 | 5.26048E-45 | 93.04017216 |

|            |              |             |              |             |             |             |
|------------|--------------|-------------|--------------|-------------|-------------|-------------|
| BMP1       | 1.654146606  | 5.42483412  | 15.45913749  | 8.73231E-46 | 6.19763E-45 | 92.99040337 |
| C5orf46    | 2.967067933  | 4.462043458 | 15.48082495  | 6.85187E-46 | 4.8878E-45  | 92.94656545 |
| CALHM6     | 2.393866288  | 5.588813446 | 15.45403539  | 9.24478E-46 | 6.54146E-45 | 92.91907092 |
| SH2D2A     | 1.503510747  | 3.822142938 | 15.45878548  | 8.76673E-46 | 6.21577E-45 | 92.82508394 |
| PGF        | 3.254638002  | 6.19505977  | 15.44104778  | 1.06888E-45 | 7.53274E-45 | 92.76413375 |
| DDIT4      | 2.207006894  | 9.358558549 | 15.43267358  | 1.1737E-45  | 8.24656E-45 | 92.68397067 |
| PTH1R      | -2.896852117 | 5.552047213 | -15.43219843 | 1.17995E-45 | 8.28213E-45 | 92.67511064 |
| BTN3A1     | 1.691508267  | 6.371415682 | 15.42692201  | 1.25158E-45 | 8.76731E-45 | 92.62017445 |
| TNFSF13B   | 1.923394634  | 4.778896368 | 15.4278763   | 1.23831E-45 | 8.68305E-45 | 92.58871796 |
| MIR155HG   | 1.616429634  | 3.721506981 | 15.43348025  | 1.16317E-45 | 8.1808E-45  | 92.50352476 |
| PYGL       | 1.915681173  | 6.396261104 | 15.40042313  | 1.68244E-45 | 1.17268E-44 | 92.32872614 |
| SLC7A13    | -2.329767176 | 2.240500984 | -15.39904592 | 1.7085E-45  | 1.18848E-44 | 92.29644448 |
| CYP2J2     | 4.046640329  | 6.965514107 | 15.39769608  | 1.73443E-45 | 1.20532E-44 | 92.28866376 |
| SLC14A2    | -2.150704319 | 2.204229928 | -15.39475712 | 1.79226E-45 | 1.24427E-44 | 92.25109756 |
| RAPGEF3    | -1.594656822 | 4.210049849 | -15.39039231 | 1.8817E-45  | 1.30378E-44 | 92.20865647 |
| HOXB5      | -1.695706481 | 3.929632161 | -15.38637536 | 1.96795E-45 | 1.3595E-44  | 92.16376537 |
| CNKSRI     | -1.828636892 | 2.650771418 | -15.3792942  | 2.12969E-45 | 1.46689E-44 | 92.08406029 |
| ADA        | 1.598857813  | 4.628931902 | 15.37424333  | 2.2531E-45  | 1.54884E-44 | 92.01115605 |
| RF00601    | -1.549825256 | 2.039793039 | -15.36794717 | 2.41698E-45 | 1.65986E-44 | 91.93283067 |
| RAC2       | 2.073095566  | 6.304978777 | 15.36388413  | 2.52898E-45 | 1.73508E-44 | 91.92710195 |
| SIRPG      | 1.523518236  | 3.511639596 | 15.38133424  | 2.08178E-45 | 1.43672E-44 | 91.89354682 |
| TRNP1      | -2.363657885 | 3.852583102 | -15.3310528  | 3.64614E-45 | 2.49177E-44 | 91.54879658 |
| SHISA2     | -1.98961608  | 2.862697837 | -15.32794645 | 3.77449E-45 | 2.57697E-44 | 91.51080561 |
| TSPAN33    | -1.696855525 | 7.359122426 | -15.28254695 | 6.25611E-45 | 4.24227E-44 | 91.00499185 |
| ITGB6      | -2.481274431 | 4.391350116 | -15.27596494 | 6.73125E-45 | 4.56005E-44 | 90.94502264 |
| AC023421.1 | -1.966253587 | 2.18105038  | -15.27483773 | 6.81616E-45 | 4.6042E-44  | 90.92085177 |
| MCAM       | 2.09968416   | 8.230847879 | 15.26033697  | 8.00858E-45 | 5.38885E-44 | 90.76750908 |
| PPFIA4     | 1.859937871  | 4.059140521 | 15.26267548  | 7.80308E-45 | 5.25562E-44 | 90.64134726 |
| FCGR2A     | 1.858194823  | 5.823923428 | 15.23787437  | 1.02791E-44 | 6.88357E-44 | 90.53434033 |
| DCN        | -3.303967274 | 4.773987481 | -15.23570435 | 1.05299E-44 | 7.04477E-44 | 90.50137858 |
| RASSF2     | 1.979994977  | 5.688914528 | 15.22395674  | 1.19973E-44 | 8.00355E-44 | 90.38087165 |
| LDHD       | -2.379980886 | 5.037567344 | -15.22077231 | 1.24291E-44 | 8.27582E-44 | 90.33704575 |
| CNTD2      | -1.581593576 | 2.225802285 | -15.21874006 | 1.27127E-44 | 8.45663E-44 | 90.2939651  |
| EOMES      | 1.522950572  | 3.484065444 | 15.23446257  | 1.06761E-44 | 7.13578E-44 | 90.2578294  |
| SHROOM3    | -1.890584444 | 3.939643967 | -15.20951057 | 1.40842E-44 | 9.35119E-44 | 90.20306484 |
| GLOD5      | -1.680181431 | 2.90877279  | -15.19782392 | 1.60345E-44 | 1.06159E-43 | 90.07657772 |
| TCEAL2     | -2.781439442 | 2.747818188 | -15.19835642 | 1.59401E-44 | 1.05633E-43 | 90.06172683 |
| CADPS2     | -1.500123519 | 5.507846794 | -15.19261418 | 1.69886E-44 | 1.12369E-43 | 90.02299637 |
| PRR15L     | -3.265732049 | 4.086023438 | -15.18530558 | 1.84233E-44 | 1.21743E-43 | 89.94453649 |
| BSPRY      | -2.380847382 | 4.125575242 | -15.18157609 | 1.92013E-44 | 1.26765E-43 | 89.8977032  |
| IL10RA     | 1.970663674  | 5.390468632 | 15.17600769  | 2.04243E-44 | 1.34585E-43 | 89.84505306 |
| PVALB      | -4.075834975 | 3.20758952  | -15.17707074 | 2.01849E-44 | 1.33133E-43 | 89.83915025 |
| MAGI3      | -1.557566572 | 3.773212101 | -15.17536555 | 2.05702E-44 | 1.35419E-43 | 89.82806646 |
| TRBC2      | 2.559605111  | 6.037205147 | 15.16289625  | 2.36196E-44 | 1.55202E-43 | 89.70444998 |
| GBP5       | 1.967228039  | 4.254831228 | 15.1606345   | 2.42192E-44 | 1.58993E-43 | 89.52464142 |
| KRT7       | -3.315938821 | 4.636409552 | -15.14409274 | 2.90912E-44 | 1.90084E-43 | 89.49045594 |
| LINC02041  | 1.971436482  | 4.141689689 | 15.15617986  | 2.54449E-44 | 1.66882E-43 | 89.45489024 |
| COL4A3     | -1.883060643 | 4.193246646 | -15.1306381  | 3.3766E-44  | 2.20013E-43 | 89.33351533 |
| SLC25A25   | -1.67279629  | 4.702039035 | -15.12043545 | 3.78039E-44 | 2.45638E-43 | 89.22251345 |
| RPS24P17   | -1.94420958  | 2.361813066 | -15.11415244 | 4.05266E-44 | 2.62841E-43 | 89.1471911  |
| PFKP       | 2.059630732  | 9.110067599 | 15.11247407  | 4.12865E-44 | 2.67027E-43 | 89.13884411 |
| CAPS       | -1.601025567 | 4.076813141 | -15.10944149 | 4.26956E-44 | 2.75631E-43 | 89.09961667 |
| RDH10      | -1.650880049 | 5.789524767 | -15.10249032 | 4.61092E-44 | 2.96846E-43 | 89.03030577 |
| CHST11     | 1.591917801  | 5.328173756 | 15.09498043  | 5.01036E-44 | 3.22266E-43 | 88.95739895 |
| DEFB1      | -3.493569319 | 9.096889072 | -15.0915621  | 5.20343E-44 | 3.34376E-43 | 88.86160804 |
| CCL4       | 2.126904601  | 5.24709587  | 15.07564603  | 6.20474E-44 | 3.96537E-43 | 88.72311508 |
| BDH1       | -1.714871534 | 3.103697027 | -15.0615849  | 7.24803E-44 | 4.61526E-43 | 88.57371359 |
| CYP27B1    | -1.736539475 | 2.765867613 | -15.05614245 | 7.69728E-44 | 4.88798E-43 | 88.51340568 |

|            |              |             |              |             |             |             |
|------------|--------------|-------------|--------------|-------------|-------------|-------------|
| DIRAS1     | -1.937820122 | 2.508090805 | -15.04725428 | 8.49142E-44 | 5.38251E-43 | 88.41169489 |
| APLN       | 2.390056556  | 7.191859977 | 15.04176121  | 9.02254E-44 | 5.714E-43   | 88.35735966 |
| HS3ST2     | 1.677779618  | 3.413741229 | 15.06043289  | 7.34089E-44 | 4.67014E-43 | 88.2991225  |
| HLA-DQB1   | 2.350113908  | 8.230506112 | 15.02919588  | 1.03654E-43 | 6.54074E-43 | 88.21575939 |
| BCAM       | -1.777699399 | 8.249213264 | -15.03052247 | 1.02147E-43 | 6.45729E-43 | 88.21204131 |
| SLAMF7     | 1.861405098  | 4.368946242 | 15.03608941  | 9.60573E-44 | 6.07784E-43 | 88.19830622 |
| CCR5       | 2.044201692  | 4.726085153 | 15.02640757  | 1.06894E-43 | 6.73913E-43 | 88.12386712 |
| VASH1      | 1.902368282  | 5.589687427 | 15.01073251  | 1.27082E-43 | 7.94742E-43 | 88.03048076 |
| GDF6       | 2.139354047  | 4.231943753 | 15.01256069  | 1.24544E-43 | 7.79568E-43 | 87.86027604 |
| MRGPRF     | -1.936409282 | 3.373223208 | -14.990612   | 1.5866E-43  | 9.85183E-43 | 87.78940608 |
| TDGF1      | -2.415680822 | 2.35499434  | -14.98971418 | 1.60238E-43 | 9.93222E-43 | 87.77113359 |
| PLCB2      | 1.542863415  | 4.353446395 | 14.99128933  | 1.57479E-43 | 9.78721E-43 | 87.75122356 |
| NXPH2      | -1.80281651  | 2.129827797 | -14.98044453 | 1.7748E-43  | 1.09718E-42 | 87.67180977 |
| HLA-H      | 1.712166173  | 8.174312679 | 14.97577278  | 1.86859E-43 | 1.15312E-42 | 87.63365942 |
| SIT1       | 1.711767767  | 4.106249719 | 14.98608318  | 1.66784E-43 | 1.03288E-42 | 87.62257338 |
| ABCA4      | -2.009147429 | 2.323309699 | -14.95280328 | 2.40671E-43 | 1.47868E-42 | 87.37240457 |
| ANK2       | -2.373354693 | 4.590234249 | -14.9492303  | 2.50331E-43 | 1.53668E-42 | 87.34499196 |
| AL365181.3 | 1.557287769  | 3.945616285 | 14.95315109  | 2.39751E-43 | 1.47432E-42 | 87.25031734 |
| CD4        | 1.813292727  | 6.867657211 | 14.93006916  | 3.09123E-43 | 1.89426E-42 | 87.12872086 |
| HLA-DPB1   | 2.046157364  | 9.742669334 | 14.92333564  | 3.32901E-43 | 2.0364E-42  | 87.05516443 |
| CLSTN2     | -2.030889256 | 2.924428522 | -14.92098475 | 3.41625E-43 | 2.08794E-42 | 87.02278851 |
| MST1L      | -2.201124522 | 3.014790662 | -14.9007212  | 4.26926E-43 | 2.6002E-42  | 86.79800777 |
| SPARC      | 1.945947047  | 11.45956798 | 14.89503609  | 4.54465E-43 | 2.76312E-42 | 86.72119078 |
| ABCC3      | 2.315298235  | 6.540511477 | 14.89046988  | 4.77862E-43 | 2.90284E-42 | 86.70754887 |
| NUAK2      | -2.061855423 | 5.516304773 | -14.88977163 | 4.81544E-43 | 2.92267E-42 | 86.69459464 |
| EVI2A      | 1.8119525    | 5.267801295 | 14.86746844  | 6.15285E-43 | 3.72149E-42 | 86.45488129 |
| ERICH4     | -1.817116225 | 2.744182838 | -14.86534204 | 6.29826E-43 | 3.80615E-42 | 86.41858568 |
| CLDN10     | -2.370235118 | 5.730105711 | -14.85508013 | 7.04964E-43 | 4.24921E-42 | 86.31181822 |
| ZDHHC2     | -1.898774853 | 5.178674985 | -14.85460653 | 7.08639E-43 | 4.26769E-42 | 86.30886551 |
| LMO7-AS1   | -1.673156282 | 2.931899507 | -14.84872648 | 7.55899E-43 | 4.54449E-42 | 86.23974873 |
| IGFBP2     | -2.418594974 | 5.120223766 | -14.84675988 | 7.72397E-43 | 4.63968E-42 | 86.2251016  |
| RGS10      | 1.522235682  | 6.603782153 | 14.81609105  | 1.08141E-42 | 6.45709E-42 | 85.88162448 |
| PTPN13     | -1.754117139 | 5.189236878 | -14.81220199 | 1.12853E-42 | 6.7327E-42  | 85.8445115  |
| PDK1       | 1.584479469  | 4.885572624 | 14.80180389  | 1.26481E-42 | 7.5265E-42  | 85.72885915 |
| APOBEC3C   | 1.960840421  | 6.900531098 | 14.79431106  | 1.37308E-42 | 8.16382E-42 | 85.64520193 |
| ELMO1      | 1.505948174  | 4.922453757 | 14.78812251  | 1.46943E-42 | 8.72928E-42 | 85.58560638 |
| AQP3       | -2.318482787 | 7.839698682 | -14.78368099 | 1.54271E-42 | 9.14907E-42 | 85.508424   |
| IL32       | 2.278278176  | 8.547355135 | 14.75305612  | 2.15743E-42 | 1.27622E-41 | 85.19602503 |
| DOK2       | 1.602550392  | 4.787023889 | 14.7487188   | 2.26231E-42 | 1.33488E-41 | 85.14246416 |
| EVI2B      | 1.965844724  | 5.990673654 | 14.74596017  | 2.33165E-42 | 1.37348E-41 | 85.13278354 |
| SH3BP2     | 1.591545737  | 6.201301109 | 14.72793397  | 2.83995E-42 | 1.6617E-41  | 84.92690999 |
| SLAMF8     | 2.021813559  | 4.965889431 | 14.72946796  | 2.7927E-42  | 1.63542E-41 | 84.91395269 |
| TRIM2      | -2.02879063  | 5.540767741 | -14.71284395 | 3.34942E-42 | 1.9549E-41  | 84.76348547 |
| BTC        | -1.506911042 | 3.463166375 | -14.70793    | 3.53424E-42 | 2.05591E-41 | 84.70619238 |
| HSD3B7     | 1.932858033  | 7.116650859 | 14.70686871  | 3.57548E-42 | 2.07645E-41 | 84.69012031 |
| CD3E       | 2.302237709  | 5.503622638 | 14.7028986   | 3.73403E-42 | 2.16673E-41 | 84.65032334 |
| ACADSB     | -1.81851215  | 5.872763166 | -14.69767669 | 3.9533E-42  | 2.29206E-41 | 84.59767963 |
| LIMD2      | 1.553567188  | 4.764251426 | 14.6923599   | 4.18974E-42 | 2.42513E-41 | 84.53090798 |
| AOAH       | 1.944357616  | 5.089640285 | 14.69101127  | 4.25192E-42 | 2.45909E-41 | 84.51359419 |
| IFI16      | 1.578897688  | 6.861370477 | 14.68219986  | 4.68148E-42 | 2.70082E-41 | 84.42133294 |
| FAM151A    | -3.064531058 | 4.190954851 | -14.66087794 | 5.90849E-42 | 3.38637E-41 | 84.19892093 |
| CDH3       | -2.190133424 | 2.807929028 | -14.66207186 | 5.832E-42   | 3.34802E-41 | 84.1948387  |
| PEG3       | -1.535320994 | 2.906615725 | -14.62559048 | 8.68224E-42 | 4.94775E-41 | 83.81085375 |
| AFM        | -2.47889328  | 2.724783365 | -14.62682735 | 8.56596E-42 | 4.88546E-41 | 83.8065615  |
| PPP1R3C    | 1.82766265   | 7.175088021 | 14.62323602  | 8.90796E-42 | 5.07224E-41 | 83.78063732 |
| LINC00472  | -1.627488236 | 3.481249172 | -14.61612854 | 9.62544E-42 | 5.47188E-41 | 83.70635627 |
| TTYH3      | 2.012473295  | 7.797238832 | 14.61282198  | 9.97858E-42 | 5.65884E-41 | 83.66819328 |
| SCIN       | -2.713376938 | 4.704807854 | -14.60649895 | 1.06903E-41 | 6.05262E-41 | 83.60984995 |

|            |              |             |              |             |             |             |
|------------|--------------|-------------|--------------|-------------|-------------|-------------|
| AC009084.1 | 1.676361124  | 3.335232344 | 14.6305398   | 8.22619E-42 | 4.70702E-41 | 83.58901132 |
| PALM       | -1.588125549 | 5.220509073 | -14.57819525 | 1.45492E-41 | 8.19771E-41 | 83.2980922  |
| LOX        | 3.338170765  | 7.372241145 | 14.57342931  | 1.53238E-41 | 8.61334E-41 | 83.25664245 |
| CLEC7A     | 1.698112795  | 4.403291482 | 14.57375949  | 1.52689E-41 | 8.59625E-41 | 83.17973478 |
| TENT5B     | -1.779061568 | 3.24332988  | -14.55310874 | 1.9115E-41  | 1.07099E-40 | 83.02139875 |
| OLFM4      | -2.095775918 | 2.256189227 | -14.54117039 | 2.17645E-41 | 1.21652E-40 | 82.88673518 |
| RRM2       | 1.524956687  | 3.984293627 | 14.53601239  | 2.30196E-41 | 1.28565E-40 | 82.71613766 |
| SLC14A1    | -2.131881164 | 3.739585034 | -14.50234391 | 3.31848E-41 | 1.83869E-40 | 82.46999451 |
| AL731533.2 | 1.653569084  | 4.648952097 | 14.49471026  | 3.60519E-41 | 1.9944E-40  | 82.36743778 |
| CHAC1      | -1.555471397 | 3.261337767 | -14.48857617 | 3.85337E-41 | 2.12833E-40 | 82.32815036 |
| LHFPL2     | 1.742915172  | 5.362895098 | 14.48353141  | 4.07019E-41 | 2.24277E-40 | 82.28565319 |
| MYEOV      | 2.474078733  | 4.044969114 | 14.50480979  | 3.23081E-41 | 1.79154E-40 | 82.22755445 |
| CXCL9      | 2.956496307  | 6.509935951 | 14.47345223  | 4.54049E-41 | 2.49798E-40 | 82.17886516 |
| TOP2A      | 1.669803282  | 4.32509021  | 14.46647875  | 4.8972E-41  | 2.69E-40    | 82.00478982 |
| CYP17A1    | -2.721042861 | 2.915866681 | -14.46032683 | 5.23501E-41 | 2.87105E-40 | 82.00222726 |
| PLEK       | 2.069552145  | 5.801673497 | 14.44822125  | 5.96906E-41 | 3.26595E-40 | 81.90622283 |
| BCL2A1     | 1.648409999  | 4.328305608 | 14.4522565   | 5.71363E-41 | 3.13109E-40 | 81.86313584 |
| EIF4EBP1   | 1.77138613   | 7.55007003  | 14.44062508  | 6.48118E-41 | 3.53785E-40 | 81.80572179 |
| CD8B       | 1.860193855  | 4.078518641 | 14.45065445  | 5.81371E-41 | 3.18344E-40 | 81.7591408  |
| OLFML2A    | 2.374949425  | 6.74374197  | 14.43345253  | 7.00487E-41 | 3.80886E-40 | 81.73949652 |
| UCHL1      | -3.055141177 | 4.942097756 | -14.42465206 | 7.70538E-41 | 4.18326E-40 | 81.6420019  |
| PNMA2      | 2.586303262  | 6.03247154  | 14.42289074  | 7.85375E-41 | 4.26051E-40 | 81.63045415 |
| AC009084.2 | 1.649879286  | 3.270439882 | 14.43537819  | 6.86026E-41 | 3.73895E-40 | 81.46750471 |
| CD8A       | 2.486533595  | 5.193291561 | 14.40603892  | 9.42547E-41 | 5.10127E-40 | 81.38557527 |
| CD27       | 2.192704333  | 4.701762613 | 14.40568279  | 9.46187E-41 | 5.11701E-40 | 81.34333439 |
| PYCARD     | 1.681376644  | 5.606089823 | 14.38611917  | 1.16921E-40 | 6.30367E-40 | 81.23667389 |
| ARHGAP30   | 1.793830575  | 5.366507708 | 14.38238281  | 1.21742E-40 | 6.55854E-40 | 81.19433093 |
| ANXA4      | 1.735252896  | 8.64516808  | 14.38137597  | 1.23075E-40 | 6.62523E-40 | 81.1744901  |
| SGK2       | -1.718707199 | 4.928769281 | -14.36818615 | 1.41937E-40 | 7.61132E-40 | 81.0296591  |
| PLIN2      | 2.823222495  | 9.57398619  | 14.33430351  | 2.04668E-40 | 1.0925E-39  | 80.66656684 |
| BICDL1     | -2.092708967 | 5.52971955  | -14.31737385 | 2.45698E-40 | 1.30753E-39 | 80.48754376 |
| OVOL1      | -1.688094315 | 2.976117011 | -14.3123281  | 2.59444E-40 | 1.37963E-39 | 80.4267576  |
| ABTB2      | -1.703062263 | 4.39441933  | -14.2775992  | 3.7727E-40  | 1.99708E-39 | 80.05346177 |
| THSD7A     | -1.822487882 | 4.375235086 | -14.26725875 | 4.21727E-40 | 2.22232E-39 | 79.94306366 |
| DOCK2      | 1.561226906  | 4.145559822 | 14.27481271  | 3.88768E-40 | 2.05328E-39 | 79.93241069 |
| TPD52L1    | -1.622345781 | 4.003168182 | -14.25388628 | 4.87046E-40 | 2.56267E-39 | 79.7987541  |
| DUSP15     | -1.939938868 | 3.231571306 | -14.23781644 | 5.79009E-40 | 3.03969E-39 | 79.62356352 |
| LZTS1      | 1.968897529  | 5.369299694 | 14.23109915  | 6.22403E-40 | 3.2626E-39  | 79.56544614 |
| HLA-J      | 1.910806995  | 5.031833585 | 14.22889925  | 6.37307E-40 | 3.33823E-39 | 79.52522077 |
| BX547991.1 | -1.862433236 | 2.448665948 | -14.22597337 | 6.57683E-40 | 3.44238E-39 | 79.49652478 |
| KCNE3      | 1.96882239   | 6.912559373 | 14.2165435   | 7.27876E-40 | 3.79558E-39 | 79.4004122  |
| FOXJ1      | -1.835294262 | 2.370693749 | -14.15850994 | 1.3576E-39  | 6.98053E-39 | 78.7745603  |
| HIGD1A     | -1.571141978 | 7.051334103 | -14.1451084  | 1.56751E-39 | 8.04799E-39 | 78.63295908 |
| ABLIM3     | 2.239912973  | 6.375707625 | 14.13486627  | 1.74947E-39 | 8.96909E-39 | 78.54112715 |
| ARHGAP24   | -1.600727603 | 5.913466793 | -14.13366876 | 1.77208E-39 | 9.07169E-39 | 78.52076001 |
| C5orf38    | -1.824551364 | 2.607809954 | -14.13274405 | 1.78973E-39 | 9.15538E-39 | 78.50179049 |
| DLL4       | 2.136247067  | 6.546137711 | 14.12608005  | 1.92226E-39 | 9.81177E-39 | 78.44237592 |
| ITGAM      | 1.602469857  | 4.706848521 | 14.12177313  | 2.01306E-39 | 1.02678E-38 | 78.37483358 |
| GAL3ST1    | 2.606048591  | 7.672625718 | 14.11917463  | 2.0699E-39  | 1.05423E-38 | 78.35770147 |
| CXCL11     | 1.965907211  | 4.257761254 | 14.11275886  | 2.21719E-39 | 1.12843E-38 | 78.14813806 |
| ACKR3      | 2.07332975   | 7.561741218 | 14.08009027  | 3.14562E-39 | 1.59054E-38 | 77.94039466 |
| HPGD       | -2.173724544 | 3.90672274  | -14.06952773 | 3.52194E-39 | 1.77825E-38 | 77.82854354 |
| ALDH1A2    | -2.247021164 | 3.387494714 | -14.06715308 | 3.61254E-39 | 1.82268E-38 | 77.79753478 |
| CTSS       | 1.894925789  | 7.59181878  | 14.05791971  | 3.98744E-39 | 2.00894E-38 | 77.70501607 |
| CCL18      | 2.598918714  | 4.448205853 | 14.07823489  | 3.20869E-39 | 1.62126E-38 | 77.69718561 |
| ANXA3      | -2.184892748 | 3.758933956 | -14.04317846 | 4.66795E-39 | 2.34841E-38 | 77.54667995 |
| CDK18      | 2.147209009  | 7.80161184  | 14.03491477  | 5.09885E-39 | 2.55967E-38 | 77.45991341 |
| CD53       | 1.775783945  | 7.334571922 | 14.02731441  | 5.53006E-39 | 2.77216E-38 | 77.37921374 |



|            |              |             |              |             |             |             |
|------------|--------------|-------------|--------------|-------------|-------------|-------------|
| HCST       | 1.741922427  | 5.545327784 | 14.01281315  | 6.45616E-39 | 3.22026E-38 | 77.2447879  |
| SORD       | -1.60544242  | 4.605641968 | -14.01438679 | 6.34861E-39 | 3.16887E-38 | 77.24416607 |
| ALDOB      | -4.919967124 | 6.636959314 | -14.00916688 | 6.71239E-39 | 3.34567E-38 | 77.15660815 |
| HOGA1      | -2.046800351 | 5.135955955 | -13.98836514 | 8.38036E-39 | 4.16518E-38 | 76.9746089  |
| CXCL10     | 2.78027174   | 6.729469975 | 13.97701141  | 9.45889E-39 | 4.68791E-38 | 76.86395744 |
| MRO        | -1.669936972 | 3.251149149 | -13.97207241 | 9.97023E-39 | 4.93435E-38 | 76.79562497 |
| GAS5       | 1.509094793  | 7.91177029  | 13.95702402  | 1.17043E-38 | 5.77622E-38 | 76.63844398 |
| TIMP1      | 2.1101179    | 10.23671233 | 13.9522512   | 1.23148E-38 | 6.06465E-38 | 76.57820159 |
| DIRAS3     | -1.661864353 | 3.367270063 | -13.90686992 | 1.99606E-38 | 9.70029E-38 | 76.10468592 |
| PDGFRA     | -2.235796076 | 3.375175596 | -13.90606655 | 2.01318E-38 | 9.77672E-38 | 76.08774487 |
| P4HA1      | 1.63085466   | 8.152283865 | 13.89357657  | 2.29904E-38 | 1.11418E-37 | 75.9674089  |
| SLC34A1    | -3.198286031 | 3.179376763 | -13.86638799 | 3.06889E-38 | 1.47602E-37 | 75.66284212 |
| BIRC7      | 2.407416564  | 4.023878052 | 13.88074637  | 2.63484E-38 | 1.27075E-37 | 75.55617786 |
| PAQR5      | -1.839520885 | 5.666339429 | -13.83772616 | 4.15982E-38 | 1.98978E-37 | 75.38037235 |
| ADAMDEC1   | 1.625652898  | 3.425669228 | 13.86247306  | 3.19913E-38 | 1.53549E-37 | 75.37382161 |
| GACAT2     | 1.592182933  | 3.324374759 | 13.86256899  | 3.19587E-38 | 1.53498E-37 | 75.36207461 |
| IRF7       | 1.508555991  | 5.811220507 | 13.82523855  | 4.74878E-38 | 2.2684E-37  | 75.25388543 |
| HMGCS2     | -3.882389319 | 5.451772854 | -13.79367226 | 6.63485E-38 | 3.15212E-37 | 74.89985682 |
| PPARGC1A   | -2.060183028 | 4.680052066 | -13.78137094 | 7.55767E-38 | 3.57114E-37 | 74.78332971 |
| OCLN       | -1.797737659 | 3.431852435 | -13.75789454 | 9.68837E-38 | 4.55334E-37 | 74.52992014 |
| LINC01358  | 1.77428451   | 3.519114617 | 13.7688908   | 8.62462E-38 | 4.06705E-37 | 74.37968925 |
| FA2H       | -1.796870333 | 2.848260181 | -13.73186046 | 1.27571E-37 | 5.97153E-37 | 74.25747569 |
| PLAT       | -1.785740289 | 5.727120693 | -13.70225157 | 1.7439E-37  | 8.13587E-37 | 73.95422896 |
| NDNF       | -3.323682552 | 3.590454043 | -13.70092852 | 1.76842E-37 | 8.23927E-37 | 73.93217361 |
| AL049629.1 | -1.547418445 | 2.489605346 | -13.68583219 | 2.07369E-37 | 9.64875E-37 | 73.77187309 |
| MOXD1      | -2.314885848 | 4.035725599 | -13.66792602 | 2.50453E-37 | 1.16148E-36 | 73.58721794 |
| TCIM       | -2.149240061 | 7.227917585 | -13.66705525 | 2.52762E-37 | 1.17141E-36 | 73.56580087 |
| GGACT      | -1.722201979 | 4.089412729 | -13.64447942 | 3.20618E-37 | 1.47805E-36 | 73.34025256 |
| ATG16L2    | 1.502444053  | 4.235650911 | 13.63311389  | 3.61367E-37 | 1.66371E-36 | 73.15971991 |
| FPR3       | 2.188472876  | 5.998706746 | 13.6198599   | 4.15444E-37 | 1.90766E-36 | 73.10154945 |
| PROCR      | 1.554192064  | 7.216587555 | 13.61105337  | 4.55761E-37 | 2.08731E-36 | 72.98951034 |
| AC073115.2 | 1.722599358  | 3.28405918  | 13.63063286  | 3.70926E-37 | 1.7066E-36  | 72.90305246 |
| ARNT2      | -1.930761166 | 4.945272718 | -13.5949895  | 5.39603E-37 | 2.45843E-36 | 72.82833186 |
| MIR1270    | 1.879937009  | 4.101845416 | 13.59972132  | 5.13425E-37 | 2.34221E-36 | 72.71315553 |
| SMPDL3A    | 1.796298006  | 7.819054978 | 13.57958464  | 6.34396E-37 | 2.87347E-36 | 72.66244936 |
| AC073115.1 | 1.640960075  | 3.257518884 | 13.60231629  | 4.9961E-37  | 2.28216E-36 | 72.61082209 |
| MAN1A1     | -1.512247832 | 7.175901372 | -13.56732695 | 7.21535E-37 | 3.26182E-36 | 72.53027796 |
| MYH14      | -2.091995312 | 4.062541774 | -13.55142103 | 8.52611E-37 | 3.83949E-36 | 72.36757889 |
| SORT1      | -1.521099691 | 6.539322698 | -13.51461528 | 1.25408E-36 | 5.61847E-36 | 71.98777306 |
| FABP5      | 1.526935326  | 4.778457927 | 13.49423931  | 1.55236E-36 | 6.93704E-36 | 71.77077027 |
| PACRG      | -1.889155194 | 3.031629108 | -13.48134456 | 1.77663E-36 | 7.89387E-36 | 71.63465403 |
| TOX3       | -2.237723427 | 3.39279319  | -13.46361615 | 2.13856E-36 | 9.47191E-36 | 71.44552779 |
| C3AR1      | 1.877013403  | 5.94456777  | 13.46065854  | 2.20571E-36 | 9.76318E-36 | 71.43858947 |
| STAB1      | 1.649858086  | 6.253840652 | 13.45613697  | 2.31246E-36 | 1.02099E-35 | 71.38208107 |
| OGDHL      | -2.64147093  | 6.12339116  | -13.42626739 | 3.1592E-36  | 1.38609E-35 | 71.06090529 |
| FYB2       | -1.718620718 | 2.571164914 | -13.42187414 | 3.30745E-36 | 1.44841E-35 | 71.01818228 |
| PHLDA3     | 1.521204577  | 6.577585327 | 13.42009484  | 3.36945E-36 | 1.47371E-35 | 71.0008672  |
| PALM3      | -1.971864405 | 4.748008328 | -13.41668498 | 3.49151E-36 | 1.52424E-35 | 70.96973286 |
| TUBAL3     | -1.545530703 | 2.174818474 | -13.41684177 | 3.4858E-36  | 1.5227E-35  | 70.95143815 |
| AC011352.3 | 1.932120065  | 3.496721302 | 13.44244869  | 2.66803E-36 | 1.17575E-35 | 70.94337488 |
| CD74       | 1.625493306  | 12.73136599 | 13.41452513  | 3.5711E-36  | 1.55801E-35 | 70.90109906 |
| SNORD99    | 1.989765353  | 4.396705252 | 13.41346507  | 3.61081E-36 | 1.57436E-35 | 70.8173662  |
| SMIM22     | -1.983917977 | 2.630540666 | -13.39903951 | 4.19715E-36 | 1.8232E-35  | 70.77799673 |
| CADM4      | -2.081555886 | 4.924483612 | -13.38389186 | 4.91513E-36 | 2.1206E-35  | 70.63179727 |
| PTHLH      | 2.646450028  | 4.481542547 | 13.39625328  | 4.32088E-36 | 1.87229E-35 | 70.51750283 |
| NCF2       | 1.593224384  | 5.232758723 | 13.34156594  | 7.63734E-36 | 3.25494E-35 | 70.20358207 |
| AL031429.2 | -2.123450523 | 3.705476753 | -13.33577752 | 8.11135E-36 | 3.45065E-35 | 70.12340681 |
| CCND1      | 2.094152586  | 9.688868549 | 13.33472151  | 8.20093E-36 | 3.48664E-35 | 70.11749818 |

|            |              |             |              |             |             |             |
|------------|--------------|-------------|--------------|-------------|-------------|-------------|
| PTGER3     | -2.8025122   | 5.267811299 | -13.32958588 | 8.65086E-36 | 3.67124E-35 | 70.06894471 |
| TSPYL5     | -1.559562819 | 4.878653309 | -13.31672473 | 9.88842E-36 | 4.18881E-35 | 69.93149534 |
| BARX2      | 2.197117624  | 5.9343729   | 13.30399806  | 1.12865E-35 | 4.77525E-35 | 69.81690441 |
| PLAU       | -1.929956038 | 6.552180952 | -13.294901   | 1.24048E-35 | 5.23893E-35 | 69.70329878 |
| HLA-DQA1   | 2.065173892  | 7.474685972 | 13.27046351  | 1.59862E-35 | 6.69887E-35 | 69.44994463 |
| AFAP1L2    | -1.597573885 | 5.161447244 | -13.26340447 | 1.72006E-35 | 7.19483E-35 | 69.38315793 |
| LINC01187  | -2.964011672 | 2.525619906 | -13.25737096 | 1.83111E-35 | 7.64564E-35 | 69.29366514 |
| HPCAL1     | 1.653393426  | 7.561232022 | 13.25188166  | 1.93833E-35 | 8.08853E-35 | 69.26014324 |
| SEZ6L2     | 2.29774466   | 6.440078799 | 13.24671163  | 2.04504E-35 | 8.51855E-35 | 69.22209256 |
| PDIA5      | 1.55228128   | 6.595720105 | 13.23914956  | 2.21173E-35 | 9.18011E-35 | 69.12935535 |
| VAT1L      | -2.071217131 | 2.868284618 | -13.22717059 | 2.5039E-35  | 1.03438E-34 | 68.9985116  |
| LCP1       | 1.882861955  | 7.288461811 | 13.22039175  | 2.68596E-35 | 1.10893E-34 | 68.93399526 |
| PSAT1      | -2.695718447 | 5.010008135 | -13.21838538 | 2.74233E-35 | 1.13087E-34 | 68.92426777 |
| PTPRO      | -1.762852604 | 3.632269496 | -13.20910833 | 3.01869E-35 | 1.24263E-34 | 68.81880307 |
| WNT7B      | -1.76758714  | 2.234169119 | -13.20298503 | 3.21612E-35 | 1.32313E-34 | 68.74899134 |
| IL4I1      | 1.743138904  | 5.013493509 | 13.19291552  | 3.56914E-35 | 1.46578E-34 | 68.65549171 |
| GPM6B      | -1.515296142 | 3.156186732 | -13.18776148 | 3.7645E-35  | 1.5451E-34  | 68.60429578 |
| PNMA8A     | -2.052525027 | 4.534499061 | -13.15966312 | 5.03261E-35 | 2.05354E-34 | 68.31482304 |
| UGT8       | -1.848007778 | 5.503262303 | -13.13633674 | 6.40256E-35 | 2.60041E-34 | 68.07961651 |
| AC011297.1 | -1.503279757 | 2.313153314 | -13.11771689 | 7.7579E-35  | 3.14723E-34 | 67.87088132 |
| KCNJ13     | -2.036013014 | 2.499629421 | -13.11631599 | 7.87073E-35 | 3.19116E-34 | 67.86097492 |
| RNASE6     | 1.706602137  | 6.668584399 | 13.08636428  | 1.07155E-34 | 4.31455E-34 | 67.56090305 |
| AP005233.2 | 1.883787468  | 3.441050656 | 13.1097044   | 8.42575E-35 | 3.41223E-34 | 67.50494481 |
| AL355102.4 | -1.730410797 | 2.540375972 | -13.08001638 | 1.1439E-34  | 4.60058E-34 | 67.49319295 |
| OSTM1-AS1  | 1.658795999  | 3.150167449 | 13.10209991  | 9.11245E-35 | 3.68394E-34 | 67.4144879  |
| TGFB1      | 1.523643238  | 7.849475821 | 13.07163882  | 1.24689E-34 | 5.00614E-34 | 67.41209264 |
| AC073486.1 | 3.289173407  | 7.412250012 | 13.05908357  | 1.41876E-34 | 5.68318E-34 | 67.29437967 |
| GZMK       | 2.414154755  | 5.198113494 | 13.05662367  | 1.45511E-34 | 5.82209E-34 | 67.21581103 |
| NPNT       | -2.082553893 | 5.802559997 | -13.05070939 | 1.54632E-34 | 6.17647E-34 | 67.20098793 |
| HES4       | 1.844629721  | 5.389552955 | 13.04819806  | 1.58676E-34 | 6.32714E-34 | 67.18492878 |
| GRB14      | -1.803884699 | 4.529558473 | -13.04304614 | 1.67303E-34 | 6.65978E-34 | 67.11818202 |
| TEX11      | 1.511747165  | 3.312642162 | 13.06848386  | 1.28802E-34 | 5.16537E-34 | 67.10854038 |
| LAG3       | 1.656772101  | 3.858164519 | 13.05745042  | 1.44279E-34 | 5.77611E-34 | 67.08457027 |
| LRRC25     | 1.709062136  | 5.215448357 | 13.0200847   | 2.11799E-34 | 8.39282E-34 | 66.89617088 |
| AC084880.1 | 1.889097695  | 5.147352556 | 13.01676273  | 2.19146E-34 | 8.67903E-34 | 66.85179147 |
| TBX3       | -1.537914735 | 3.903399678 | -13.00921847 | 2.36787E-34 | 9.35123E-34 | 66.771847   |
| LINC01230  | -2.00452666  | 2.241204048 | -13.00182965 | 2.55435E-34 | 1.00706E-33 | 66.68979316 |
| NT5DC3     | 1.6702183    | 4.756692086 | 13.00162645  | 2.55968E-34 | 1.00859E-33 | 66.67993567 |
| CXCL13     | 1.879788048  | 3.75762503  | 13.00607522  | 2.44548E-34 | 9.65228E-34 | 66.49965651 |
| STMN3      | 1.895551583  | 7.062762323 | 12.97072542  | 3.5136E-34  | 1.37749E-33 | 66.37786756 |
| HLA-G      | 2.762313041  | 6.031288143 | 12.96649647  | 3.66914E-34 | 1.43445E-33 | 66.34554559 |
| SLC44A4    | -2.573124429 | 5.197245519 | -12.95933434 | 3.94836E-34 | 1.54103E-33 | 66.27109711 |
| MS4A4A     | 1.830917257  | 5.616274043 | 12.95705737  | 4.04149E-34 | 1.57387E-33 | 66.25823268 |
| C21orf62   | -1.990952362 | 3.322793135 | -12.9577817  | 4.01163E-34 | 1.56398E-33 | 66.24185901 |
| MYH10      | -1.83786997  | 5.971185256 | -12.91884619 | 5.97446E-34 | 2.31118E-33 | 65.85719037 |
| ARG2       | -2.623458706 | 5.215011082 | -12.90948486 | 6.57422E-34 | 2.53619E-33 | 65.7637301  |
| FBP1       | -2.175795397 | 7.177001631 | -12.90364335 | 6.97848E-34 | 2.68326E-33 | 65.68486857 |
| SLC2A3     | 1.989911683  | 6.646265687 | 12.89897683  | 7.31913E-34 | 2.80961E-33 | 65.65475271 |
| ADAMTS16   | -1.689105799 | 2.806964216 | -12.89564724 | 7.57225E-34 | 2.9036E-33  | 65.61539461 |
| OXCT1      | -1.990954768 | 5.71851801  | -12.89259926 | 7.81161E-34 | 2.9921E-33  | 65.59146615 |
| COL6A2     | 1.938696737  | 8.633552929 | 12.88939023  | 8.07175E-34 | 3.08667E-33 | 65.55723635 |
| CYGB       | 1.766662502  | 6.281986605 | 12.88148178  | 8.75027E-34 | 3.34249E-33 | 65.48004333 |
| CTXN3      | -2.698908781 | 2.819204678 | -12.84807499 | 1.23016E-33 | 4.67354E-33 | 65.11368502 |
| BIRC3      | 2.034493704  | 6.756019206 | 12.84301343  | 1.29526E-33 | 4.91021E-33 | 65.085987   |
| MNDA       | 1.763375931  | 5.442713487 | 12.83901539  | 1.3491E-33  | 5.10601E-33 | 65.0589306  |
| MISP       | -2.054187797 | 3.342729181 | -12.82687833 | 1.52657E-33 | 5.76523E-33 | 64.91310126 |
| SAMHD1     | 1.510611971  | 7.063571693 | 12.79498608  | 2.11162E-33 | 7.91916E-33 | 64.59367565 |
| EGFR-AS1   | 2.009671099  | 3.755957534 | 12.8172911   | 1.68304E-33 | 6.33903E-33 | 64.55482685 |

|            |              |             |              |             |             |             |
|------------|--------------|-------------|--------------|-------------|-------------|-------------|
| MAP3K7CL   | 1.657220636  | 5.180474926 | 12.7876067   | 2.27609E-33 | 8.51315E-33 | 64.53547298 |
| AP006284.1 | 1.78887148   | 3.944739656 | 12.79300049  | 2.15468E-33 | 8.07197E-33 | 64.39523516 |
| LINC01235  | 1.834856955  | 4.063039123 | 12.77287309  | 2.64359E-33 | 9.86132E-33 | 64.20005926 |
| DIRAS2     | 2.12935315   | 4.993147541 | 12.72251111  | 4.40622E-33 | 1.62459E-32 | 63.82682081 |
| ANO5       | -1.82385452  | 2.753788202 | -12.71203286 | 4.89966E-33 | 1.80462E-32 | 63.75685    |
| LRRC19     | -2.31493433  | 4.691004306 | -12.69433805 | 5.86092E-33 | 2.14962E-32 | 63.58769323 |
| C6orf223   | 2.567860839  | 5.688599444 | 12.66457007  | 7.91969E-33 | 2.88807E-32 | 63.28035053 |
| ASS1       | -1.993884843 | 8.183989702 | -12.66226553 | 8.1063E-33  | 2.95458E-32 | 63.23599955 |
| FAM193B    | 1.62265544   | 5.362833644 | 12.64183216  | 9.9645E-33  | 3.61304E-32 | 63.0715171  |
| PCSK6      | 2.159761502  | 4.963677709 | 12.64453309  | 9.69644E-33 | 3.51766E-32 | 63.03592848 |
| SERPINA4   | -2.001910448 | 2.549004198 | -12.60601505 | 1.43011E-32 | 5.15872E-32 | 62.68843108 |
| NRP2       | 1.562822012  | 5.092520949 | 12.59741643  | 1.55956E-32 | 5.61988E-32 | 62.62203164 |
| MFAP3L     | -1.67105189  | 5.182430834 | -12.58869666 | 1.70274E-32 | 6.12638E-32 | 62.52522914 |
| ALOX5      | 1.99323942   | 5.772934405 | 12.55645662  | 2.35538E-32 | 8.41395E-32 | 62.21678318 |
| PLXND1     | 1.517878855  | 7.221347119 | 12.54629953  | 2.60862E-32 | 9.2996E-32  | 62.09489475 |
| TMEM45A    | 2.099623339  | 4.844941898 | 12.53673439  | 2.87182E-32 | 1.02223E-31 | 61.94199284 |
| COX4I2     | 2.165439062  | 6.107156454 | 12.51531344  | 3.56107E-32 | 1.26371E-31 | 61.80520535 |
| CA2        | -1.690119544 | 8.352931063 | -12.5110975  | 3.71498E-32 | 1.31766E-31 | 61.72328947 |
| SLC2A1     | 1.893967582  | 8.184155785 | 12.50290846  | 4.0331E-32  | 1.42905E-31 | 61.66565799 |
| CYS1       | -2.487894272 | 7.435618039 | -12.50138127 | 4.09536E-32 | 1.45037E-31 | 61.62962677 |
| CD200      | 1.515189646  | 6.274046203 | 12.48924072  | 4.62557E-32 | 1.63566E-31 | 61.5312728  |
| AMBP       | -1.764457059 | 3.240457831 | -12.4718218  | 5.50774E-32 | 1.93977E-31 | 61.35271609 |
| SLFN11     | 1.542299032  | 5.783845803 | 12.46531048  | 5.87889E-32 | 2.06736E-31 | 61.30301429 |
| MCHR1      | 1.914070932  | 3.611690634 | 12.48172642  | 4.98742E-32 | 1.76095E-31 | 61.17359892 |
| ADTRP      | -1.544200927 | 3.01033317  | -12.43594246 | 7.88729E-32 | 2.75563E-31 | 61.00096288 |
| SEMA6A     | 1.750100499  | 5.790822618 | 12.42947691  | 8.41402E-32 | 2.93526E-31 | 60.94965878 |
| AL353801.1 | -1.789108436 | 3.435985594 | -12.42831771 | 8.51209E-32 | 2.96799E-31 | 60.91909623 |
| AC073218.1 | 2.471982304  | 5.795318306 | 12.42164497  | 9.09915E-32 | 3.16953E-31 | 60.86527368 |
| PSORS1C3   | 2.469171515  | 5.603872623 | 12.4165431   | 9.57503E-32 | 3.32867E-31 | 60.80300743 |
| KCNE4      | 1.794559356  | 5.559885525 | 12.39316626  | 1.20925E-31 | 4.18513E-31 | 60.59066386 |
| GPRC5A     | -2.130320081 | 3.605658003 | -12.39059173 | 1.24072E-31 | 4.28769E-31 | 60.54177699 |
| AXL        | 1.548246979  | 6.989620583 | 12.38496528  | 1.31236E-31 | 4.52633E-31 | 60.48847336 |
| AC093496.1 | -1.651776428 | 2.449107715 | -12.38275844 | 1.34157E-31 | 4.62252E-31 | 60.46546562 |
| TFAP2A     | -1.778984525 | 2.700291329 | -12.37684825 | 1.42303E-31 | 4.88874E-31 | 60.40900925 |
| KIAA0895L  | 1.561123233  | 4.97461093  | 12.36758518  | 1.56071E-31 | 5.35385E-31 | 60.32854666 |
| COL4A1     | 1.861308378  | 9.665346076 | 12.36657367  | 1.57653E-31 | 5.40281E-31 | 60.30756334 |
| IRF6       | -2.058061669 | 4.927719771 | -12.36111052 | 1.66474E-31 | 5.70233E-31 | 60.26064663 |
| AC022144.1 | 1.746956039  | 4.83721497  | 12.35740544  | 1.72735E-31 | 5.91099E-31 | 60.20706101 |
| GRB10      | 1.510611308  | 6.658940722 | 12.34927879  | 1.87299E-31 | 6.39686E-31 | 60.13613391 |
| MSR1       | 1.819802241  | 5.329441481 | 12.3313937   | 2.23799E-31 | 7.61373E-31 | 59.97460447 |
| RHOBTB3    | -1.796226322 | 4.922636463 | -12.27606655 | 3.87824E-31 | 1.3048E-30  | 59.41771902 |
| AL080317.1 | 1.940687101  | 5.3723792   | 12.25411451  | 4.82166E-31 | 1.60906E-30 | 59.20986029 |
| NTRK2      | -1.910819798 | 3.735499306 | -12.25127646 | 4.95923E-31 | 1.65261E-30 | 59.16671411 |
| SEMA3B     | -1.634375727 | 4.765947777 | -12.2402297  | 5.53294E-31 | 1.84203E-30 | 59.06215771 |
| USP2       | -1.996409379 | 5.066569621 | -12.23896683 | 5.60259E-31 | 1.86256E-30 | 59.05505037 |
| SCD5       | -2.428623776 | 5.422211663 | -12.23330065 | 5.92602E-31 | 1.96821E-30 | 58.99960166 |
| CD14       | 1.638435015  | 8.215784603 | 12.2318578   | 6.0113E-31  | 1.99465E-30 | 58.98319241 |
| NMB        | 1.915415778  | 6.578485177 | 12.2304881   | 6.09339E-31 | 2.02093E-30 | 58.97032824 |
| CSF1R      | 1.675707491  | 6.814184623 | 12.22674247  | 6.32361E-31 | 2.0953E-30  | 58.92701839 |
| SLC5A3     | -1.880243871 | 5.884346162 | -12.2064381  | 7.73079E-31 | 2.55189E-30 | 58.73482697 |
| SLC22A7    | -2.201069759 | 3.051908687 | -12.16948559 | 1.1138E-30  | 3.63543E-30 | 58.35584792 |
| ADAMTS4    | 1.968580073  | 5.272932226 | 12.15597496  | 1.27267E-30 | 4.14432E-30 | 58.23853962 |
| EXOC3L4    | 1.568762119  | 4.395723865 | 12.14963427  | 1.35481E-30 | 4.40362E-30 | 58.12781576 |
| CHRD1      | -2.437656442 | 3.210084557 | -12.14051282 | 1.48232E-30 | 4.80689E-30 | 58.06949964 |
| PTPRC      | 1.812152516  | 5.68807185  | 12.12976064  | 1.64803E-30 | 5.33931E-30 | 57.99490773 |
| COL5A2     | 1.823932873  | 6.240048882 | 12.10184511  | 2.1694E-30  | 6.99283E-30 | 57.71340896 |
| HLA-DQB2   | 2.381633413  | 5.930023707 | 12.09939975  | 2.22223E-30 | 7.15982E-30 | 57.69662142 |
| CTSL3P     | 1.626888365  | 3.847143117 | 12.11211353  | 1.96087E-30 | 6.33232E-30 | 57.63810788 |

|              |              |             |              |             |             |             |
|--------------|--------------|-------------|--------------|-------------|-------------|-------------|
| LG14         | 2.744989275  | 5.496071238 | 12.08117661  | 2.65837E-30 | 8.54538E-30 | 57.46010493 |
| HLA-DRB1     | 1.586895989  | 11.5991383  | 12.0742366   | 2.84601E-30 | 9.13597E-30 | 57.40148856 |
| HLA-DPA1     | 1.762049801  | 9.11613018  | 12.05743646  | 3.3566E-30  | 1.07405E-29 | 57.27422887 |
| PCSK1N       | -2.63154923  | 4.65793901  | -12.05475426 | 3.44616E-30 | 1.09969E-29 | 57.25242577 |
| MUC1         | -2.096068932 | 6.647771811 | -12.0221173  | 4.74637E-30 | 1.50841E-29 | 56.920483   |
| ACAN         | 1.702696612  | 4.299569388 | 12.00918597  | 5.38744E-30 | 1.70826E-29 | 56.70748751 |
| HLA-DRA      | 1.655543225  | 12.41176696 | 11.99128184  | 6.41953E-30 | 2.02725E-29 | 56.58479051 |
| RIMKLA       | 1.545868777  | 4.365119905 | 11.97317408  | 7.66336E-30 | 2.40917E-29 | 56.39608713 |
| SLC29A4      | 1.741684706  | 5.327675965 | 11.94914091  | 9.6916E-30  | 3.03453E-29 | 56.2324891  |
| SUCNR1       | -1.98156208  | 4.606986523 | -11.9346068  | 1.11688E-29 | 3.48458E-29 | 56.07826809 |
| GPR4         | 1.736618891  | 6.523759559 | 11.91790583  | 1.31445E-29 | 4.09186E-29 | 55.91661462 |
| FBLN5        | -2.110011118 | 6.080578588 | -11.88873012 | 1.74652E-29 | 5.39862E-29 | 55.63342186 |
| CTHRC1       | 2.347164474  | 5.559229249 | 11.86757199  | 2.14571E-29 | 6.60319E-29 | 55.4278719  |
| GPR27        | -1.517741142 | 3.231810013 | -11.86125954 | 2.28151E-29 | 7.01494E-29 | 55.36963799 |
| SOD3         | -1.660537973 | 6.72850394  | -11.85870895 | 2.33877E-29 | 7.1784E-29  | 55.34062224 |
| KCNMA1       | 1.539838677  | 4.157131509 | 11.86226317  | 2.25936E-29 | 6.94989E-29 | 55.28361991 |
| QRFPR        | 2.010300952  | 4.890671713 | 11.8557493   | 2.40702E-29 | 7.37816E-29 | 55.27521557 |
| HHLA2        | 2.79673976   | 5.947383413 | 11.84015633  | 2.80065E-29 | 8.55103E-29 | 55.16625819 |
| RTP4         | 1.503013414  | 5.836007252 | 11.83356371  | 2.98576E-29 | 9.09239E-29 | 55.11085799 |
| AGR2         | -2.1114206   | 2.406652573 | -11.83451526 | 2.95831E-29 | 9.02451E-29 | 55.09968493 |
| ALDOC        | 2.14576913   | 7.080305864 | 11.82976924  | 3.09776E-29 | 9.42937E-29 | 55.0624899  |
| WLS          | -1.557675703 | 6.74558516  | -11.82713961 | 3.17782E-29 | 9.66467E-29 | 55.03712822 |
| PGGHG        | 2.444589838  | 6.03913021  | 11.79733562  | 4.24253E-29 | 1.28137E-28 | 54.76781646 |
| CDH4         | 1.878510002  | 3.928047798 | 11.81258122  | 3.65978E-29 | 1.10919E-28 | 54.68025742 |
| KLK1         | -2.943473488 | 2.714808623 | -11.79195619 | 4.46947E-29 | 1.34584E-28 | 54.67451564 |
| PRSS8        | -1.96156055  | 6.261233768 | -11.7658008  | 5.757E-29   | 1.72169E-28 | 54.44809883 |
| UNC5B        | 1.67230532   | 6.461128869 | 11.76437051  | 5.83719E-29 | 1.74418E-28 | 54.43580332 |
| ABCB1        | -2.046890698 | 5.34361737  | -11.76066925 | 6.04989E-29 | 1.80465E-28 | 54.4048939  |
| CP           | 3.452865981  | 7.032081563 | 11.74490611  | 7.04555E-29 | 2.09223E-28 | 54.26576059 |
| MAPK8IP3     | 1.576131083  | 5.134398227 | 11.74174239  | 7.26421E-29 | 2.15311E-28 | 54.23079988 |
| PRSS35       | -1.569323149 | 3.148862233 | -11.73638992 | 7.64962E-29 | 2.26064E-28 | 54.16659021 |
| CXorf36      | 1.677735606  | 5.773894225 | 11.70392696  | 1.04634E-28 | 3.07917E-28 | 53.86939395 |
| CYP3A5       | 1.667580038  | 4.585253393 | 11.70124479  | 1.07374E-28 | 3.15451E-28 | 53.79546202 |
| COL8A1       | 1.908758443  | 5.822590889 | 11.69466397  | 1.14405E-28 | 3.35542E-28 | 53.78274778 |
| LYZ          | 2.436075638  | 8.613661357 | 11.67808591  | 1.34211E-28 | 3.92645E-28 | 53.60624576 |
| MYC          | 1.692445004  | 7.412117419 | 11.67131914  | 1.43243E-28 | 4.18196E-28 | 53.53906995 |
| MT1F         | -2.081027963 | 5.798042302 | -11.6614765  | 1.57471E-28 | 4.58776E-28 | 53.45268675 |
| VWCE         | 1.501510104  | 3.830115607 | 11.66437588  | 1.5314E-28  | 4.4653E-28  | 53.32074461 |
| C16orf74     | 1.543764559  | 3.989302529 | 11.65602647  | 1.65945E-28 | 4.83263E-28 | 53.26927712 |
| KITLG        | -1.645783683 | 5.490742331 | -11.64095413 | 1.91814E-28 | 5.56285E-28 | 53.25746295 |
| ALDH4A1      | -1.90125805  | 6.512260962 | -11.62148051 | 2.31258E-28 | 6.69289E-28 | 53.06474145 |
| IL20RB       | 2.139368277  | 3.964964268 | 11.64807975  | 1.79119E-28 | 5.2098E-28  | 53.05983189 |
| ENAM         | -1.589407607 | 3.347493147 | -11.60467011 | 2.71729E-28 | 7.82857E-28 | 52.90686232 |
| CYP39A1      | -1.502410763 | 3.431609121 | -11.60355862 | 2.74641E-28 | 7.90594E-28 | 52.89778473 |
| BMP6         | -1.611860846 | 4.574178984 | -11.60130946 | 2.80628E-28 | 8.07497E-28 | 52.87304806 |
| FAM107A      | -1.653897649 | 5.351986092 | -11.58119776 | 3.40272E-28 | 9.74713E-28 | 52.68741417 |
| DAO          | -2.010927963 | 3.341620826 | -11.56972295 | 3.79785E-28 | 1.08523E-27 | 52.56721642 |
| CRABP1       | -2.001649124 | 2.35368281  | -11.5579815  | 4.24941E-28 | 1.20884E-27 | 52.4549796  |
| SEL1L3       | 1.552440588  | 6.826536285 | 11.55244189  | 4.4806E-28  | 1.27254E-27 | 52.40633345 |
| HLA-DQB1-AS1 | 1.592661475  | 4.51154401  | 11.51851559  | 6.19577E-28 | 1.74619E-27 | 52.04983635 |
| GUCA2B       | 1.580164701  | 3.248344241 | 11.53017038  | 5.54331E-28 | 1.56672E-27 | 51.89777458 |
| C2orf40      | -1.89427548  | 3.920410648 | -11.46437735 | 1.03794E-27 | 2.88233E-27 | 51.57220413 |
| AC087379.2   | -2.139941331 | 2.967024271 | -11.46342026 | 1.04743E-27 | 2.90755E-27 | 51.5555181  |
| P2RY8        | 1.564238614  | 5.316617908 | 11.41509214  | 1.65798E-27 | 4.55715E-27 | 51.12815356 |
| TPSAB1       | 1.693440461  | 4.587943323 | 11.38459191  | 2.214E-27   | 6.0451E-27  | 50.7855667  |
| COL1A1       | 2.564039742  | 8.20804227  | 11.37684604  | 2.38255E-27 | 6.49932E-27 | 50.74617459 |
| NTN4         | -1.77439914  | 7.454796468 | -11.37374956 | 2.45344E-27 | 6.68581E-27 | 50.70874529 |
| CDH1         | -1.697719439 | 6.796188025 | -11.36965531 | 2.5504E-27  | 6.93924E-27 | 50.67997031 |

|            |              |             |              |             |             |             |
|------------|--------------|-------------|--------------|-------------|-------------|-------------|
| DPT        | -1.895941498 | 3.591869311 | -11.36864481 | 2.57492E-27 | 7.00321E-27 | 50.66898221 |
| ANGPTL3    | -2.284634066 | 3.684658077 | -11.34684023 | 3.16478E-27 | 8.56423E-27 | 50.46279985 |
| SPINK13    | 1.829898515  | 3.869198803 | 11.36685114  | 2.619E-27   | 7.12035E-27 | 50.43057731 |
| AC093583.1 | -1.810325587 | 3.694097909 | -11.33436575 | 3.56076E-27 | 9.6135E-27  | 50.34835613 |
| PLOD2      | 1.53073188   | 7.678252846 | 11.33303031  | 3.60597E-27 | 9.73179E-27 | 50.33906279 |
| AHSA2P     | 1.524577311  | 4.85519282  | 11.33021153  | 3.70327E-27 | 9.98669E-27 | 50.31704517 |
| LINC02061  | -1.898928082 | 2.831286902 | -11.32968948 | 3.72157E-27 | 1.00283E-26 | 50.30212364 |
| CDKN1C     | -1.520120054 | 5.865956416 | -11.32046514 | 4.06025E-27 | 1.09157E-26 | 50.22753668 |
| PXDN       | 1.603485186  | 6.008792621 | 11.30135931  | 4.86226E-27 | 1.30219E-26 | 50.05213322 |
| GPR183     | 1.560240302  | 5.557467972 | 11.30025032  | 4.91337E-27 | 1.31487E-26 | 50.04911673 |
| OSMR       | 1.507318384  | 7.098117609 | 11.30085755  | 4.88532E-27 | 1.30786E-26 | 50.03412337 |
| AC092535.4 | 1.631404953  | 4.217900494 | 11.28695176  | 5.56951E-27 | 1.48591E-26 | 49.8086486  |
| ASPDH      | -1.732538752 | 3.728995005 | -11.25936184 | 7.22143E-27 | 1.9135E-26  | 49.64751872 |
| ST14       | -1.785628915 | 6.186223942 | -11.25502922 | 7.5218E-27  | 1.99158E-26 | 49.61269524 |
| KIT        | -1.776215582 | 4.541330236 | -11.24362348 | 8.37323E-27 | 2.20783E-26 | 49.50258569 |
| CHST13     | 1.718783139  | 4.852817268 | 11.23368396  | 9.1929E-27  | 2.42214E-26 | 49.40309142 |
| NECTIN4    | -1.520068944 | 2.567568021 | -11.2116984  | 1.13002E-26 | 2.96286E-26 | 49.20293142 |
| CREB3L3    | 2.137978277  | 4.659148344 | 11.22039107  | 1.0415E-26  | 2.73487E-26 | 49.1996612  |
| HRH2       | 2.026594854  | 4.642322598 | 11.19642496  | 1.30403E-26 | 3.39494E-26 | 48.97943245 |
| WDR72      | -1.980017583 | 5.423158901 | -11.16668121 | 1.72291E-26 | 4.45727E-26 | 48.79340014 |
| IL2RG      | 1.610425614  | 5.961207579 | 11.1614775   | 1.80886E-26 | 4.67445E-26 | 48.7492977  |
| CDH6       | 1.994534072  | 6.864632439 | 11.15622352  | 1.89997E-26 | 4.90627E-26 | 48.69022792 |
| GLIS1      | 1.513580123  | 4.536379278 | 11.15819276  | 1.8653E-26  | 4.81852E-26 | 48.68695581 |
| FBLN1      | -1.768751309 | 4.863192879 | -11.15399763 | 1.93993E-26 | 5.00576E-26 | 48.67081176 |
| PMEPA1     | 1.579780928  | 6.966952915 | 11.14945609  | 2.02407E-26 | 5.21326E-26 | 48.62309639 |
| AC078864.1 | 1.998814469  | 5.185379343 | 11.14767356  | 2.05808E-26 | 5.29306E-26 | 48.60737886 |
| AC022509.2 | 1.686978443  | 4.615366691 | 11.12278014  | 2.59679E-26 | 6.6541E-26  | 48.34579767 |
| COX7A2P1   | -1.640592736 | 3.005457439 | -11.09046844 | 3.50982E-26 | 8.94129E-26 | 48.08087019 |
| SLC34A3    | -1.691952709 | 2.928360639 | -11.08576891 | 3.66687E-26 | 9.33118E-26 | 48.03680683 |
| OR2I1P     | 2.671123758  | 6.438516966 | 11.07368459  | 4.1035E-26  | 1.04044E-25 | 47.94425555 |
| CDHR1      | 1.609215846  | 3.598686076 | 11.09058709  | 3.50594E-26 | 8.93466E-26 | 47.84360673 |
| SLC17A4    | 2.524169217  | 5.145789985 | 11.07103015  | 4.20612E-26 | 1.06531E-25 | 47.83890409 |
| SEMA3G     | -1.805109936 | 5.207092048 | -11.04262059 | 5.47761E-26 | 1.37886E-25 | 47.64362327 |
| FREM2      | -1.543168802 | 3.718534832 | -11.04071467 | 5.57545E-26 | 1.40147E-25 | 47.62099858 |
| UBD        | 2.367384792  | 6.341482339 | 11.00538287  | 7.73846E-26 | 1.92993E-25 | 47.31296877 |
| SLC28A1    | 2.327227718  | 7.463382308 | 11.00634424  | 7.6698E-26  | 1.91349E-25 | 47.3017092  |
| MYO15B     | 1.596275589  | 5.71286595  | 11.00014207  | 8.12358E-26 | 2.02309E-25 | 47.26335477 |
| IL1RL1     | -1.900111849 | 3.463364301 | -10.9958314  | 8.45458E-26 | 2.10178E-25 | 47.2030407  |
| HAVCR2     | 2.030016659  | 6.504850141 | 10.98461539  | 9.37995E-26 | 2.32934E-25 | 47.11315625 |
| MMP9       | 2.143183418  | 4.771315938 | 10.98050254  | 9.74392E-26 | 2.41772E-25 | 46.98742608 |
| NEBL       | -1.553442829 | 5.024595538 | -10.90656844 | 1.92863E-25 | 4.71085E-25 | 46.39084995 |
| PIGR       | -3.441873201 | 6.13910544  | -10.90485199 | 1.95938E-25 | 4.78427E-25 | 46.35774546 |
| TRAC       | 1.685571094  | 6.369027386 | 10.8839561   | 2.37506E-25 | 5.78713E-25 | 46.18745508 |
| SLCO2B1    | 1.573704965  | 5.839442467 | 10.88090584  | 2.44265E-25 | 5.9477E-25  | 46.16839402 |
| SNORD104   | 1.769070042  | 4.959213537 | 10.87208182  | 2.64916E-25 | 6.43709E-25 | 46.07170358 |
| C10orf99   | 2.297561538  | 4.063610141 | 10.89276993  | 2.18999E-25 | 5.34178E-25 | 45.9908968  |
| CCL4L2     | 1.753655228  | 4.604739002 | 10.86441461  | 2.84261E-25 | 6.88564E-25 | 45.95999805 |
| CD36       | 2.014498319  | 6.059764882 | 10.84598228  | 3.36703E-25 | 8.1306E-25  | 45.8532087  |
| GJA1       | 1.715963546  | 8.130576636 | 10.81966321  | 4.28642E-25 | 1.02762E-24 | 45.59964739 |
| PCDH17     | 1.628093758  | 5.034080239 | 10.80339763  | 4.97516E-25 | 1.1903E-24  | 45.45799901 |
| RGS5       | 2.267783626  | 10.37973196 | 10.7719463   | 6.63365E-25 | 1.57953E-24 | 45.15572184 |
| KCNJ16     | -1.788135926 | 7.488293754 | -10.76449532 | 7.10096E-25 | 1.68793E-24 | 45.08331959 |
| KSR1       | 1.578166235  | 5.715113763 | 10.74921145  | 8.16431E-25 | 1.93412E-24 | 44.97365527 |
| LINC01874  | -1.98785884  | 2.634324258 | -10.73600058 | 9.20991E-25 | 2.17446E-24 | 44.83181633 |
| DCDC2      | -1.891882681 | 5.444427523 | -10.70837883 | 1.18452E-24 | 2.7807E-24  | 44.59580816 |
| PIPOX      | -1.925234924 | 4.392114868 | -10.64934655 | 2.02524E-24 | 4.69292E-24 | 44.05712366 |
| CD248      | 1.610966327  | 7.071847374 | 10.63460366  | 2.3148E-24  | 5.34797E-24 | 43.92096448 |
| EPS8L1     | -1.551397344 | 3.336360157 | -10.62297147 | 2.57199E-24 | 5.92064E-24 | 43.82261611 |

|            |              |             |              |             |             |             |
|------------|--------------|-------------|--------------|-------------|-------------|-------------|
| C4B        | 1.884066337  | 5.693028343 | 10.60948096  | 2.90596E-24 | 6.68286E-24 | 43.71754029 |
| CNTN3      | -1.565243143 | 2.456479523 | -10.59101228 | 3.43403E-24 | 7.86623E-24 | 43.52825166 |
| SPATA18    | 1.516652942  | 5.736318668 | 10.58320754  | 3.68487E-24 | 8.42428E-24 | 43.47775274 |
| PCK1       | -3.010416238 | 6.056642488 | -10.57011967 | 4.14698E-24 | 9.45295E-24 | 43.33671102 |
| SFTA2      | -1.669085873 | 2.38815667  | -10.56474879 | 4.35287E-24 | 9.90936E-24 | 43.29207182 |
| WT1        | -1.789705066 | 3.003989643 | -10.5553008  | 4.73998E-24 | 1.07591E-23 | 43.21137544 |
| SLC39A14   | 1.596193855  | 7.809618047 | 10.55414146  | 4.78977E-24 | 1.08686E-23 | 43.20413798 |
| AC087482.1 | 2.141963797  | 5.869161766 | 10.55128472  | 4.91471E-24 | 1.11341E-23 | 43.19654566 |
| MIR140     | 1.883623201  | 4.460466345 | 10.55605459  | 4.70788E-24 | 1.06897E-23 | 43.13714988 |
| GBP1       | 1.561086513  | 6.623929801 | 10.52819991  | 6.05042E-24 | 1.36495E-23 | 42.97022598 |
| KCCAT333   | 2.901285929  | 5.097522138 | 10.54568118  | 5.16923E-24 | 1.16955E-23 | 42.9613344  |
| ETNK2      | -1.532166734 | 5.357421593 | -10.50166884 | 7.68047E-24 | 1.71993E-23 | 42.73909106 |
| SLC6A8     | 1.512524162  | 8.527536293 | 10.47327477  | 9.90986E-24 | 2.20506E-23 | 42.48852962 |
| C2         | 1.910976057  | 5.048608299 | 10.4681191   | 1.03787E-23 | 2.30352E-23 | 42.43001628 |
| ANO1       | 1.550091106  | 5.538642281 | 10.4620766   | 1.09563E-23 | 2.43017E-23 | 42.40080108 |
| CHST15     | 1.510343217  | 6.287283335 | 10.45908345  | 1.12541E-23 | 2.49385E-23 | 42.35906356 |
| PROC       | -1.676766004 | 3.163864145 | -10.40144316 | 1.88432E-23 | 4.11179E-23 | 41.84524803 |
| RF00154    | 1.618248886  | 4.507264076 | 10.37842675  | 2.31368E-23 | 5.02831E-23 | 41.59897837 |
| BDKRB2     | -1.633435505 | 4.219643042 | -10.37250713 | 2.43899E-23 | 5.29571E-23 | 41.58760668 |
| APOD       | -1.655298573 | 4.400186677 | -10.35861539 | 2.76014E-23 | 5.97816E-23 | 41.46546707 |
| NGF        | 1.549730491  | 5.15182473  | 10.33241143  | 3.4844E-23  | 7.50733E-23 | 41.25219972 |
| G6PC       | -2.355639349 | 3.661958324 | -10.32730243 | 3.64618E-23 | 7.8366E-23  | 41.18490036 |
| RGCC       | 1.549646228  | 8.69742713  | 10.31084069  | 4.21988E-23 | 9.02804E-23 | 41.05190063 |
| PLVAP      | 1.75020362   | 10.62467389 | 10.29775291  | 4.73921E-23 | 1.01174E-22 | 40.91200975 |
| RERGL      | -1.516311043 | 3.779877544 | -10.27628779 | 5.73165E-23 | 1.21693E-22 | 40.74284901 |
| PHGDH      | -1.748598789 | 5.066042532 | -10.26278919 | 6.45872E-23 | 1.36881E-22 | 40.62786733 |
| LARGE2     | -1.575882772 | 4.386621252 | -10.22558042 | 8.97168E-23 | 1.88145E-22 | 40.29674945 |
| PLG        | -2.702803777 | 3.375460975 | -10.22408557 | 9.09076E-23 | 1.90585E-22 | 40.27384222 |
| TGFBI      | 2.790775785  | 8.518856567 | 10.22164314  | 9.28872E-23 | 1.9456E-22  | 40.26000268 |
| FLT1       | 1.738550105  | 7.682371038 | 10.20541802  | 1.07168E-22 | 2.23269E-22 | 40.12083881 |
| TPSB2      | 1.666349709  | 4.601967232 | 10.19220172  | 1.20394E-22 | 2.49782E-22 | 39.97556403 |
| DSP        | -1.873308315 | 5.829788288 | -10.17983954 | 1.34226E-22 | 2.7774E-22  | 39.9053927  |
| LAMC2      | -1.806860384 | 3.970306027 | -10.16637926 | 1.51085E-22 | 3.11518E-22 | 39.77929454 |
| ALPK2      | 1.713207756  | 5.518521477 | 10.15302383  | 1.69886E-22 | 3.49152E-22 | 39.68460307 |
| KRT223P    | 2.039292576  | 4.167607362 | 10.14896785  | 1.76043E-22 | 3.61592E-22 | 39.43131285 |
| AC021744.1 | 2.390279522  | 5.255972911 | 10.11218241  | 2.43016E-22 | 4.94799E-22 | 39.28517656 |
| LINC01426  | 1.581034077  | 4.111458888 | 10.11483375  | 2.37441E-22 | 4.84152E-22 | 39.204757   |
| PTGDS      | -2.129118573 | 5.064392319 | -10.08472839 | 3.0896E-22  | 6.26153E-22 | 39.08025998 |
| PAH        | -2.501391774 | 3.888517367 | -9.988644611 | 7.13281E-22 | 1.41725E-21 | 38.24250112 |
| C4A        | 1.883730798  | 5.732684196 | 9.984354051  | 7.40337E-22 | 1.46975E-21 | 38.22621983 |
| CYBB       | 1.727555383  | 6.487520567 | 9.985827519  | 7.30932E-22 | 1.45191E-21 | 38.22296056 |
| GPR34      | 1.561466895  | 5.429688753 | 9.957937898  | 9.30827E-22 | 1.83543E-21 | 37.99946443 |
| SLC38A4    | -1.73537781  | 2.918926096 | -9.955512597 | 9.50582E-22 | 1.87227E-21 | 37.9581049  |
| CPVL       | -1.509753438 | 7.115053383 | -9.926753489 | 1.21904E-21 | 2.38426E-21 | 37.70865078 |
| F2RL3      | 1.866332632  | 5.270166243 | 9.923833866  | 1.25019E-21 | 2.44312E-21 | 37.69887743 |
| SCGN       | 2.870221167  | 5.658539605 | 9.90291591   | 1.4976E-21  | 2.91036E-21 | 37.47699301 |
| TEK        | -1.567178256 | 5.762995824 | -9.886754635 | 1.72149E-21 | 3.33066E-21 | 37.3781441  |
| ADH6       | -1.544952728 | 3.61117076  | -9.872878439 | 1.94E-21    | 3.74514E-21 | 37.25436214 |
| LINC02384  | 1.587558099  | 4.251052905 | 9.783483517  | 4.17737E-21 | 7.88596E-21 | 36.41557877 |
| SLPI       | -3.228110594 | 5.559656115 | -9.773776963 | 4.53881E-21 | 8.53604E-21 | 36.40655433 |
| SLC2A5     | 1.963588852  | 6.101881894 | 9.736085595  | 6.26098E-21 | 1.16838E-20 | 36.10860703 |
| ADSSL1     | 1.837776737  | 5.757089489 | 9.677608151  | 1.02949E-20 | 1.9024E-20  | 35.61909112 |
| F3         | -1.547318172 | 4.156854336 | -9.61885856  | 1.69305E-20 | 3.10075E-20 | 35.10618403 |
| C1QL1      | 2.526239469  | 5.586502556 | 9.579541054  | 2.35901E-20 | 4.27677E-20 | 34.77329185 |
| C1orf210   | -1.836087715 | 5.241254237 | -9.57709938  | 2.40803E-20 | 4.36112E-20 | 34.76509157 |
| TUBA3D     | 1.691001697  | 3.544966739 | 9.604802579  | 1.90643E-20 | 3.48333E-20 | 34.71311999 |
| FN1        | 1.651394372  | 8.850883478 | 9.557950133  | 2.82916E-20 | 5.10139E-20 | 34.60516502 |
| CLDN7      | -1.61433771  | 6.233912334 | -9.52517621  | 3.72582E-20 | 6.68375E-20 | 34.33220655 |

|            |              |             |              |             |             |             |
|------------|--------------|-------------|--------------|-------------|-------------|-------------|
| ACTG2      | 1.726901012  | 4.962765434 | 9.519658072  | 3.90233E-20 | 6.98963E-20 | 34.2778539  |
| RRAD       | 1.605710123  | 7.341544884 | 9.501826953  | 4.5313E-20  | 8.07899E-20 | 34.13073153 |
| FSTL3      | 1.56869799   | 7.247814818 | 9.490151108  | 4.99656E-20 | 8.88813E-20 | 34.03370904 |
| WFDC2      | -2.11418327  | 7.21585883  | -9.48957443  | 5.02073E-20 | 8.92885E-20 | 34.01795951 |
| CYP1B1     | -1.701813813 | 5.459393232 | -9.473989557 | 5.71959E-20 | 1.01485E-19 | 33.90921722 |
| CKMT2      | -1.832669864 | 3.699517157 | -9.465365332 | 6.1469E-20  | 1.08901E-19 | 33.8283727  |
| APOLD1     | 1.821115008  | 7.249212205 | 9.44155811   | 7.49769E-20 | 1.32363E-19 | 33.63157868 |
| MELTF      | -1.500595442 | 3.02956067  | -9.417077258 | 9.19339E-20 | 1.61241E-19 | 33.43764317 |
| ARL4C      | 1.535696836  | 6.699702938 | 9.411411303  | 9.63709E-20 | 1.68896E-19 | 33.38431501 |
| PDGFD      | 1.563111106  | 6.782497912 | 9.406149849  | 1.00681E-19 | 1.76317E-19 | 33.34061105 |
| CA4        | -1.814384845 | 4.312428012 | -9.397320731 | 1.08346E-19 | 1.89599E-19 | 33.26972468 |
| GJB1       | -1.626886046 | 5.465363634 | -9.370307167 | 1.35575E-19 | 2.35598E-19 | 33.05476887 |
| CD163      | 1.714990384  | 6.117265471 | 9.352211196  | 1.57503E-19 | 2.73027E-19 | 32.91122317 |
| AC136475.3 | 2.106985667  | 4.859446144 | 9.335256685  | 1.81221E-19 | 3.12669E-19 | 32.69939929 |
| UGT3A1     | -2.057733276 | 4.365393695 | -9.318822209 | 2.07579E-19 | 3.57001E-19 | 32.62851229 |
| VCAN       | 1.876773781  | 6.55932277  | 9.311052182  | 2.21329E-19 | 3.80089E-19 | 32.56839878 |
| KCNK3      | 2.041931251  | 5.663849128 | 9.280582458  | 2.84518E-19 | 4.86098E-19 | 32.33371171 |
| PROM1      | -2.532155611 | 4.77273394  | -9.272173571 | 3.04905E-19 | 5.19787E-19 | 32.2558376  |
| SORCS2     | -1.65754093  | 3.81291419  | -9.225605475 | 4.46935E-19 | 7.55471E-19 | 31.86728222 |
| HLA-DRB6   | 1.514194359  | 7.359680895 | 9.200436192  | 5.49227E-19 | 9.23251E-19 | 31.6630443  |
| NGFR       | 1.546668263  | 5.237853259 | 9.111200422  | 1.13669E-18 | 1.87696E-18 | 30.96434793 |
| LY6E       | 1.567421149  | 8.866301337 | 9.05681476   | 1.76623E-18 | 2.89125E-18 | 30.51523802 |
| APOL1      | 1.532239903  | 8.516415895 | 9.054266305  | 1.803E-18   | 2.95006E-18 | 30.49605144 |
| AC104031.1 | 1.526875457  | 4.769701518 | 9.038189797  | 2.05306E-18 | 3.34824E-18 | 30.35938813 |
| LHFPL3-AS2 | -1.611283636 | 4.411015713 | -8.992101496 | 2.9764E-18  | 4.80925E-18 | 29.99261083 |
| C19orf33   | 1.836374201  | 7.240663119 | 8.938452684  | 4.57791E-18 | 7.31087E-18 | 29.56509146 |
| CYP4F3     | -1.508391245 | 2.975331652 | -8.910963341 | 5.7036E-18  | 9.07957E-18 | 29.35577618 |
| MIR647     | 1.550170715  | 4.798912213 | 8.903386594  | 6.05937E-18 | 9.63058E-18 | 29.29137477 |
| CPA3       | 1.569006551  | 4.891850885 | 8.881479871  | 7.21626E-18 | 1.14356E-17 | 29.12295014 |
| SPON2      | 1.592132509  | 5.78155846  | 8.861317639  | 8.47287E-18 | 1.33814E-17 | 28.97570237 |
| AC007406.2 | 1.670391326  | 5.103531177 | 8.852876187  | 9.06118E-18 | 1.42816E-17 | 28.90598533 |
| CCL20      | 2.127456785  | 5.183547083 | 8.818659453  | 1.1889E-17  | 1.8617E-17  | 28.61080429 |
| APCDD1L    | -1.518953059 | 2.836719197 | -8.782729932 | 1.57994E-17 | 2.46026E-17 | 28.34732704 |
| BTNL9      | 1.643268873  | 5.597254665 | 8.762310141  | 1.85634E-17 | 2.87786E-17 | 28.20424189 |
| CCDC8      | -1.640169136 | 4.792511252 | -8.702986572 | 2.96056E-17 | 4.54841E-17 | 27.72482697 |
| SERPINE1   | 1.934185404  | 8.347353573 | 8.696348961  | 3.11882E-17 | 4.78735E-17 | 27.67524589 |
| CLRN3      | 1.952609943  | 7.17414206  | 8.696816186  | 3.10741E-17 | 4.77088E-17 | 27.67351536 |
| SPINK1     | -1.793892902 | 3.828105461 | -8.654274409 | 4.33561E-17 | 6.6188E-17  | 27.34467172 |
| RHEX       | 1.514683351  | 6.176519308 | 8.652237561  | 4.40517E-17 | 6.71913E-17 | 27.33710216 |
| TSPAN1     | -1.948368126 | 8.046265372 | -8.653299852 | 4.36875E-17 | 6.66649E-17 | 27.31626648 |
| FLRT3      | -1.75985392  | 5.119843967 | -8.601729168 | 6.53089E-17 | 9.8775E-17  | 26.94725624 |
| LUM        | -2.287298799 | 6.358450773 | -8.598581376 | 6.69276E-17 | 1.01136E-16 | 26.91399626 |
| MUC20      | -1.560298558 | 4.921558903 | -8.583713093 | 7.51254E-17 | 1.13181E-16 | 26.80545031 |
| COL5A1     | 1.559676049  | 5.487483104 | 8.577486367  | 7.88466E-17 | 1.18609E-16 | 26.77619471 |
| APOH       | -1.612670446 | 3.028711113 | -8.523314164 | 1.19939E-16 | 1.78962E-16 | 26.34563025 |
| SLC9A3-AS1 | 1.819319863  | 5.365020492 | 8.427342509  | 2.50921E-16 | 3.68045E-16 | 25.63028878 |
| POSTN      | 1.733055659  | 6.333784358 | 8.329156011  | 5.30429E-16 | 7.66298E-16 | 24.88205299 |
| CAPN6      | -1.901735912 | 4.265001765 | -8.321131196 | 5.63726E-16 | 8.13392E-16 | 24.81443947 |
| VCAM1      | 1.694396321  | 8.718965453 | 8.283030194  | 7.52203E-16 | 1.07889E-15 | 24.53697452 |
| KL         | -1.61088915  | 6.616278563 | -8.173348254 | 1.71577E-15 | 2.41443E-15 | 23.71847148 |
| HAVCR1     | 2.090722273  | 6.370123514 | 8.149074427  | 2.05691E-15 | 2.88289E-15 | 23.55181065 |
| AC015722.2 | 1.519272505  | 3.816445694 | 8.162711483  | 1.85778E-15 | 2.60849E-15 | 23.45921221 |
| CYP24A1    | -1.684874514 | 3.285742802 | -8.116219009 | 2.6274E-15  | 3.66193E-15 | 23.29749691 |
| LINC02294  | -1.658237693 | 3.423360473 | -8.093566331 | 3.10905E-15 | 4.32118E-15 | 23.13157499 |
| APLNR      | 1.535153364  | 6.408186309 | 8.065897679  | 3.81681E-15 | 5.28284E-15 | 22.93066507 |
| RNU1-14P   | 1.799785688  | 5.202384811 | 8.048786536  | 4.33179E-15 | 5.97435E-15 | 22.81561048 |
| LCN2       | -1.653704442 | 2.826332295 | -8.031600137 | 4.91794E-15 | 6.76277E-15 | 22.68010681 |
| CSDC2      | -1.722163943 | 3.907331558 | -8.020438877 | 5.33983E-15 | 7.32996E-15 | 22.59585685 |

|            |              |             |              |             |             |             |
|------------|--------------|-------------|--------------|-------------|-------------|-------------|
| NAPSA      | -1.735467645 | 4.863822332 | -8.007915527 | 5.85583E-15 | 8.02881E-15 | 22.50949106 |
| COL1A2     | 1.511541387  | 8.227557415 | 7.941471734  | 9.53481E-15 | 1.29487E-14 | 22.03242125 |
| SLC22A6    | -2.485343399 | 4.879411518 | -7.893632708 | 1.35174E-14 | 1.82475E-14 | 21.69209937 |
| KCNJ15     | -1.531132691 | 6.276622547 | -7.819376844 | 2.31608E-14 | 3.09193E-14 | 21.15827161 |
| CPN2       | -1.767694314 | 2.824656626 | -7.783715336 | 2.99532E-14 | 3.98276E-14 | 20.89785408 |
| LIX1       | -1.589240173 | 3.05815191  | -7.655708787 | 7.48213E-14 | 9.7979E-14  | 19.99898812 |
| MT1X       | -1.532795132 | 6.830112629 | -7.534812895 | 1.75673E-13 | 2.26485E-13 | 19.15750873 |
| AC111000.2 | 1.526866395  | 5.126427486 | 7.52136066   | 1.93046E-13 | 2.48425E-13 | 19.08268892 |
| HLA-DQA2   | 1.949099657  | 6.685327412 | 7.466001084  | 2.84174E-13 | 3.64021E-13 | 18.68877983 |
| TMEM174    | -2.011138234 | 4.898665301 | -7.398660405 | 4.5343E-13  | 5.74734E-13 | 18.2312102  |
| IGF2       | -1.854456743 | 4.727432348 | -7.353633315 | 6.18546E-13 | 7.78663E-13 | 17.92272566 |
| SLC16A12   | -1.744522176 | 6.565594156 | -7.299536612 | 8.96442E-13 | 1.12123E-12 | 17.55564711 |
| BEX1       | -1.666818074 | 3.552960962 | -7.273066138 | 1.07405E-12 | 1.33979E-12 | 17.37712594 |
| CES3       | 1.610209209  | 5.597813591 | 7.110784258  | 3.2156E-12  | 3.93405E-12 | 16.32053594 |
| HAO2       | -1.908162175 | 5.563104821 | -7.100303544 | 3.44921E-12 | 4.20955E-12 | 16.2399824  |
| SLC6A19    | -2.156480573 | 4.487141152 | -7.040055549 | 5.15339E-12 | 6.24366E-12 | 15.84148326 |
| MFAP4      | -1.657997104 | 5.96616368  | -6.746533696 | 3.50124E-11 | 4.10895E-11 | 13.96618597 |
| IGHA1      | 1.981168651  | 9.263113712 | 6.708701768  | 4.46023E-11 | 5.21254E-11 | 13.7264491  |
| LTF        | -1.775785177 | 4.623853298 | -6.676116372 | 5.48936E-11 | 6.39709E-11 | 13.51943675 |
| SLC22A12   | -2.066031895 | 5.222650378 | -6.66386989  | 5.93355E-11 | 6.90783E-11 | 13.45036926 |
| IGLC2      | 1.907751175  | 7.941298228 | 6.661988936  | 6.00482E-11 | 6.98732E-11 | 13.43002763 |
| IGLC3      | 1.916529079  | 7.190002873 | 6.623172121  | 7.67799E-11 | 8.90611E-11 | 13.18683163 |
| IGHA2      | 1.740902067  | 6.550008537 | 6.49934195   | 1.66853E-10 | 1.91196E-10 | 12.43304406 |
| IGHM       | 1.768247728  | 6.855579561 | 6.48048434   | 1.87588E-10 | 2.14816E-10 | 12.31418844 |
| REG1A      | 2.11785392   | 5.416563489 | 6.382310421  | 3.43603E-10 | 3.8984E-10  | 11.73133634 |
| MMP7       | -1.784030076 | 6.929208596 | -6.379481101 | 3.49609E-10 | 3.96526E-10 | 11.70096252 |
| IGKC       | 1.915497054  | 8.623791877 | 6.262609588  | 7.11252E-10 | 7.99958E-10 | 11.01823928 |
| SLC17A3    | 1.951188536  | 7.294636858 | 6.257887284  | 7.31789E-10 | 8.22661E-10 | 10.98162758 |
| DES        | -1.50530766  | 4.081473071 | -6.238964152 | 8.20065E-10 | 9.20419E-10 | 10.87269584 |
| PRIMA1     | 1.550403776  | 4.644292895 | 6.238197502  | 8.23852E-10 | 9.24522E-10 | 10.85113329 |
| STAC2      | -1.633849734 | 3.351424938 | -6.187425192 | 1.11668E-09 | 1.24653E-09 | 10.57307887 |
| IGHG3      | 1.747181035  | 6.600210461 | 6.100964953  | 1.86536E-09 | 2.06776E-09 | 10.07368054 |
| CDHR5      | 1.518078171  | 7.287713978 | 5.926087584  | 5.16917E-09 | 5.66988E-09 | 9.07550093  |
| FGG        | 1.514608661  | 3.613893222 | 5.820813198  | 9.43331E-09 | 1.03019E-08 | 8.257492876 |
| IGHG1      | 1.84011679   | 7.981775892 | 5.733143874  | 1.54597E-08 | 1.6781E-08  | 8.012049178 |
| IGLV1-40   | 1.633219393  | 6.359382994 | 5.560355468  | 4.0175E-08  | 4.31999E-08 | 7.088141495 |
| IGHG2      | 1.605498656  | 8.06279881  | 5.429890141  | 8.12783E-08 | 8.68773E-08 | 6.403598616 |
| IGLV3-19   | 1.542132288  | 6.095433354 | 5.164504577  | 3.26086E-07 | 3.44289E-07 | 5.063414355 |
| RBP4       | -1.810558447 | 5.947750173 | -5.139149397 | 3.71216E-07 | 3.91525E-07 | 4.936103783 |
| CYP4A11    | -1.664780567 | 5.477092537 | -5.013831836 | 6.98852E-07 | 7.33768E-07 | 4.325488548 |
