# Supplementary figures and images for: The Diagnostic and Prognostic Values of HOXA Gene Family in Kidney Clear Cell Renal Cell Carcinoma
Source: Hindawi journal article supplement (doi:10.1155/2022/1762637), 2022-03-16

Grade

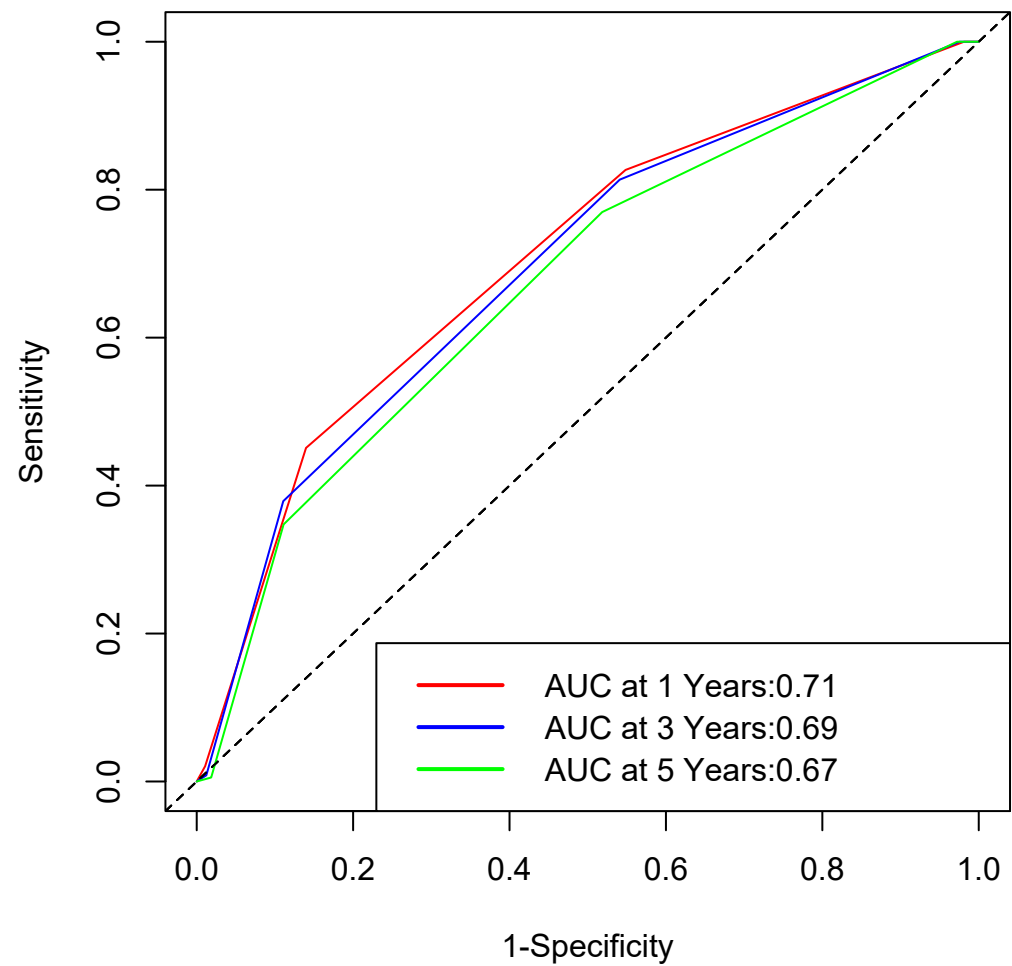

TNM

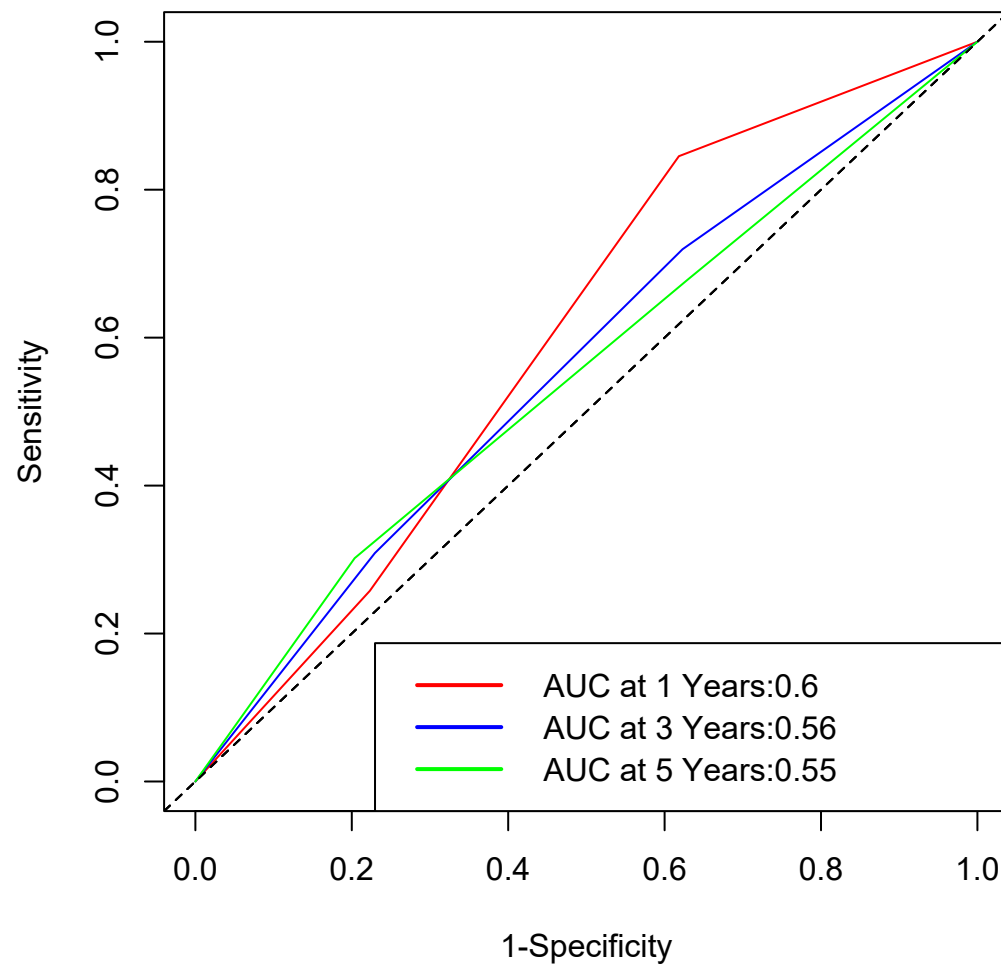

Supplement: f1 [file 1762637.f1.zip]

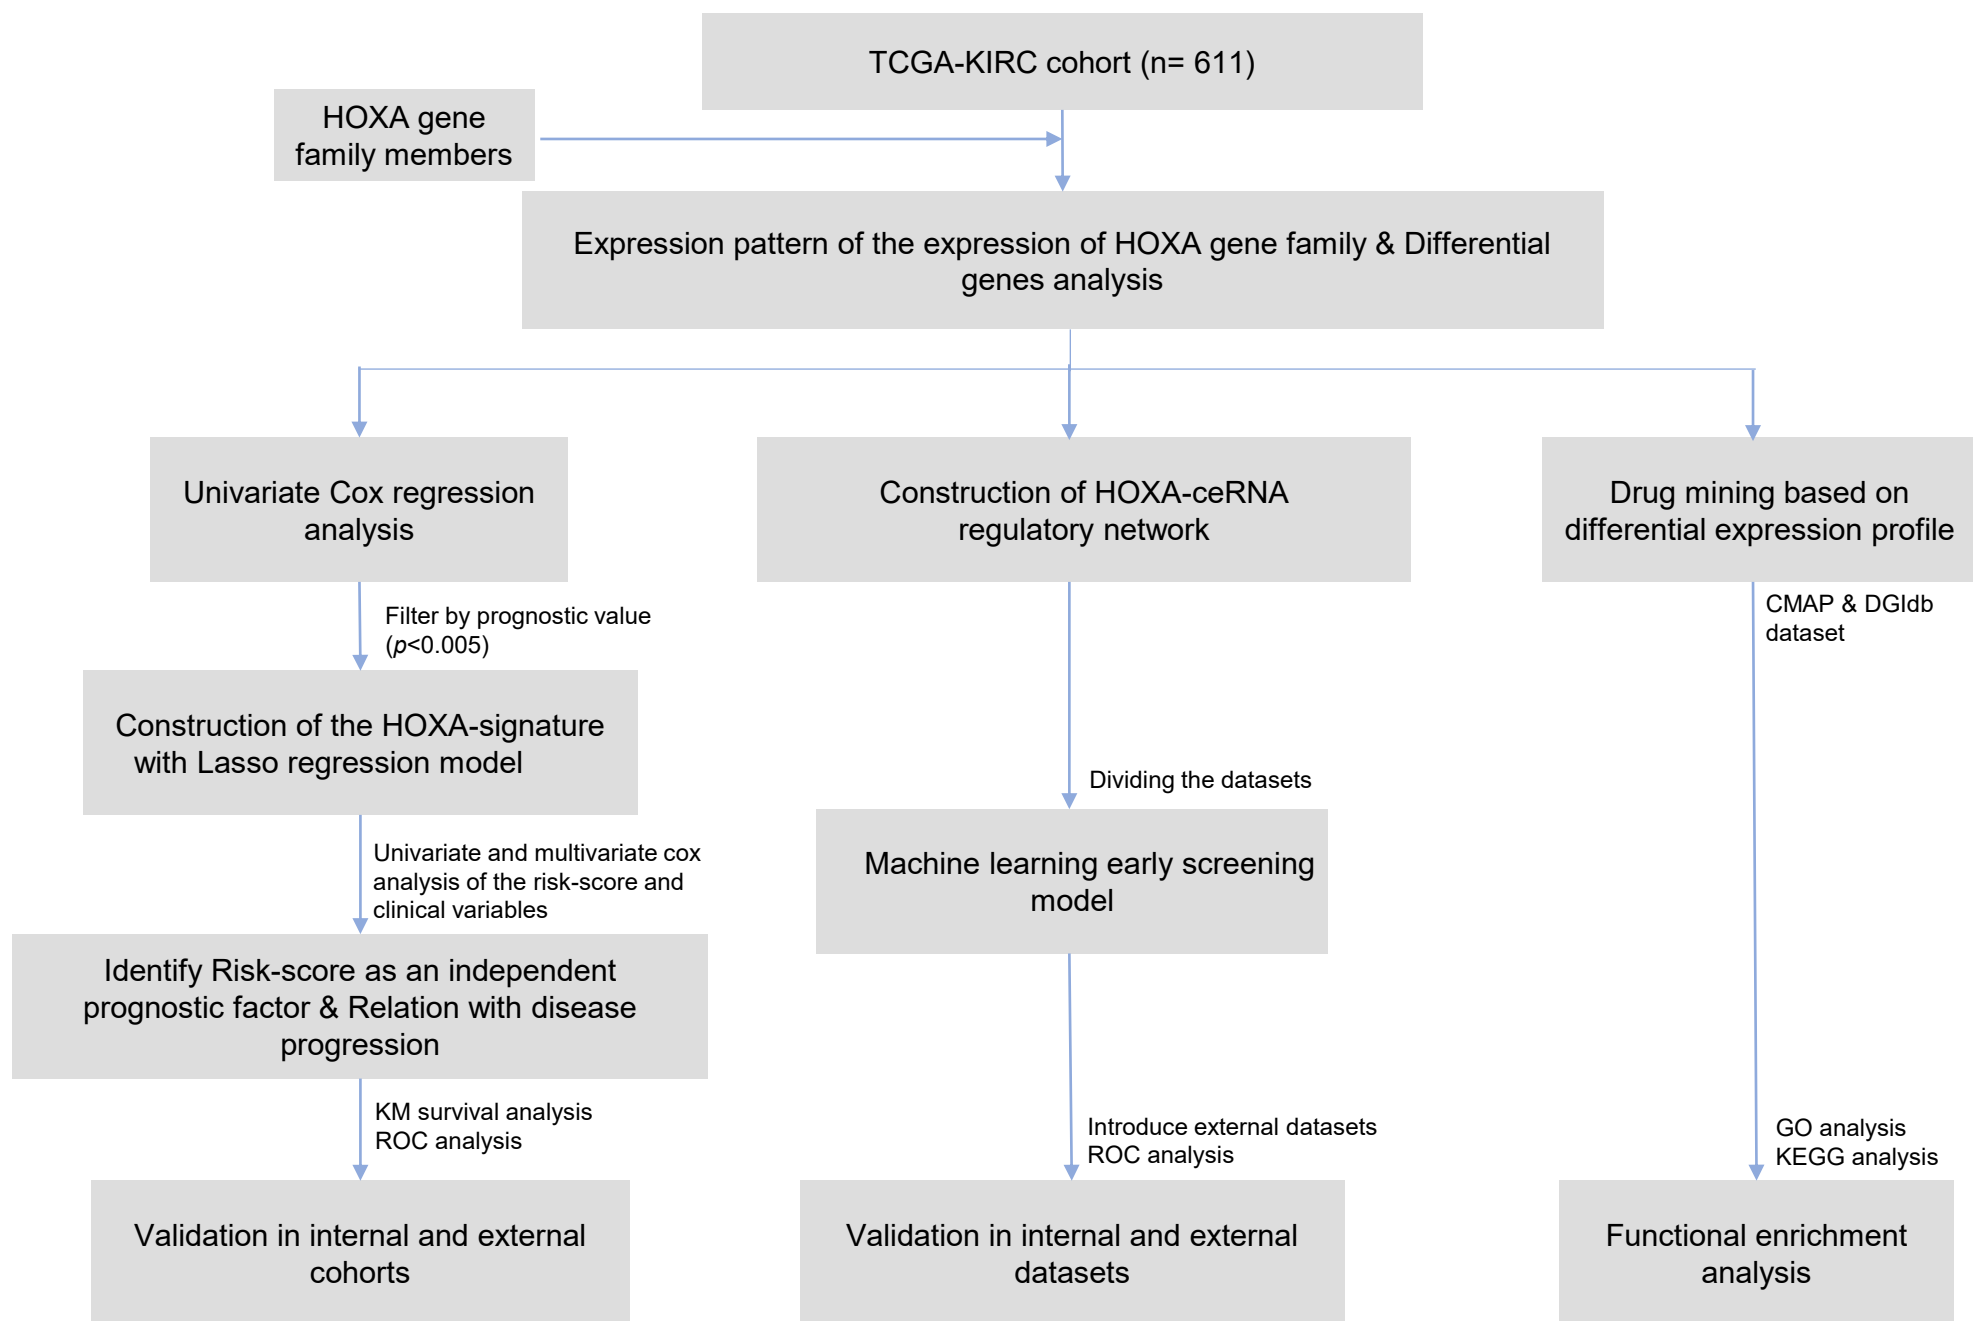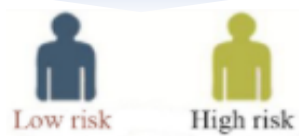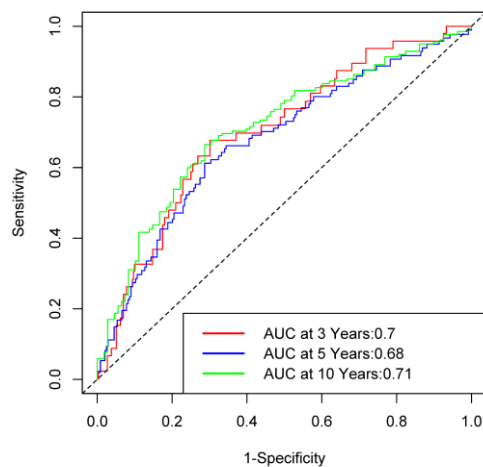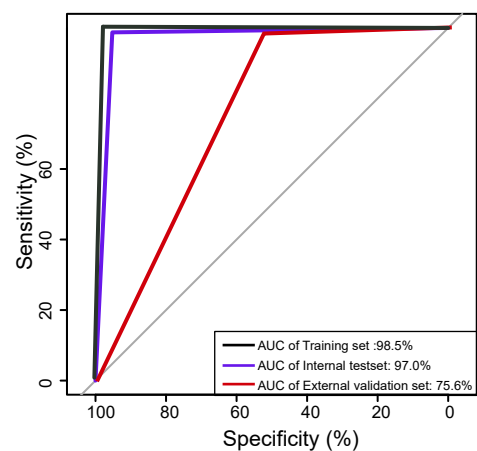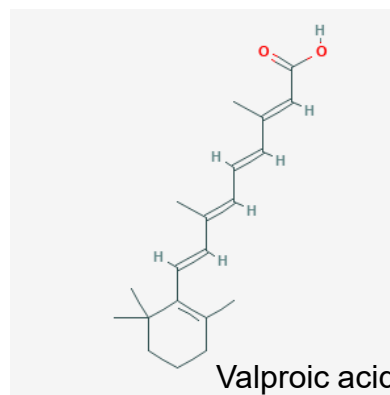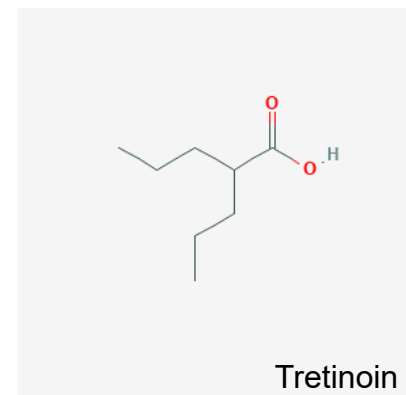

Supplement: f1 [file 1762637.f1.zip]

Overall Survival

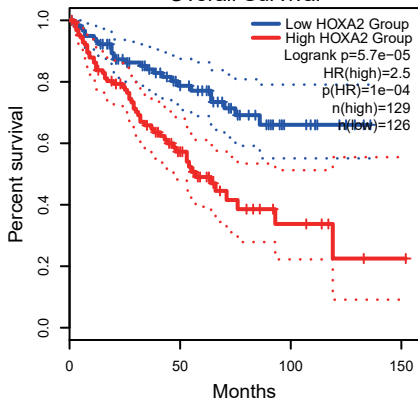

Overall Survival

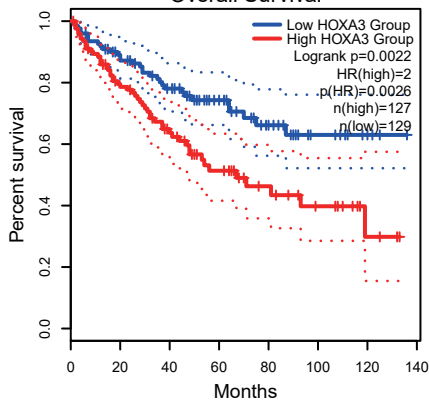

Overall Survival

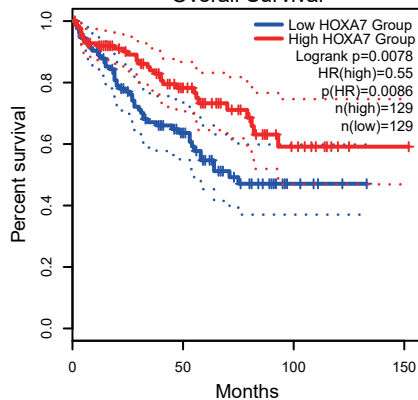

Overall Survival

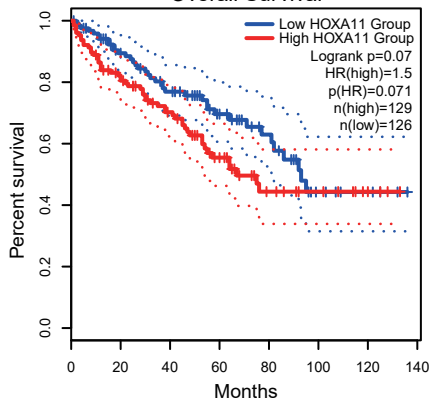

Overall Survival

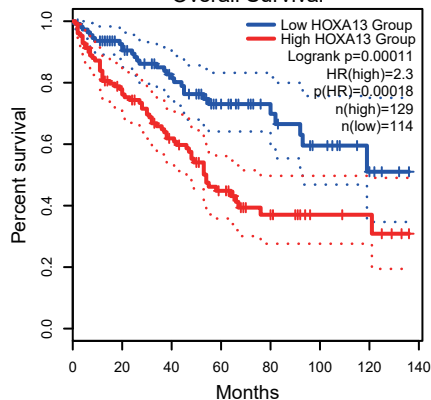

Supplement: f1 [file 1762637.f1.zip]
